# Supplementary material for: Integrating genetic variation with deep learning provides context for variants impacting transcription factor binding during embryogenesis
Source: Genome Res. 2025 May;35(5):1138–53. doi: 10.1101/gr.279652.124 (PMC12047541; doi:10.1101/gr.279652.124)
Supplement: Supplement 1 [file Supplemental_Table_S1.xlsx]

## Sheet: Sheet1
sampleName	mother	father	timePoint	replicate	Antibody	Number of reads
399_1012h_rep1_bin	399	399	1012	1	bin	30145611
399_1012h_rep1_input	399	399	1012	1	input	32583894
399_1012h_rep1_mef2	399	399	1012	1	mef2	24809193
399_1012h_rep2_bin	399	399	1012	2	bin	29714481
399_1012h_rep2_mef2	399	399	1012	2	mef2	19257052
399_24h_rep1_input	399	399	24	1	input	30342045
399_24h_rep1_twi	399	399	24	1	twi	12850905
399_24h_rep1_zld	399	399	24	1	zld	11040377
399_24h_rep2_twi	399	399	24	2	twi	26043095
399_24h_rep2_zld	399	399	24	2	zld	20225459
399_68h_rep1_bin	399	399	68	1	bin	35569858
399_68h_rep1_ctcf	399	399	68	1	ctcf	31748139
399_68h_rep1_input	399	399	68	1	input	27530846
399_68h_rep1_mef2	399	399	68	1	mef2	29854560
399_68h_rep2_bin	399	399	68	2	bin	18600003
399_68h_rep2_ctcf	399	399	68	2	ctcf	21286185
399_68h_rep2_mef2	399	399	68	2	mef2	24307823
Dsim_1012h_rep1_input	Dsim	Dsim	1012	1	input	28996598
Dsim_24h_rep1_input	Dsim	Dsim	24	1	input	29145720
Dsim_68h_rep1_input	Dsim	Dsim	68	1	input	30883588
vgn28_1012h_rep1_bin	vgn	28	1012	1	bin	39611450
vgn28_1012h_rep1_input	vgn	28	1012	1	input	33819241
vgn28_1012h_rep1_mef2	vgn	28	1012	1	mef2	35718185
vgn28_1012h_rep2_bin	vgn	28	1012	2	bin	34010367
vgn28_1012h_rep2_mef2	vgn	28	1012	2	mef2	23890938
vgn28_24h_rep1_input	vgn	28	24	1	input	31425636
vgn28_24h_rep1_twi	vgn	28	24	1	twi	15322827
vgn28_24h_rep1_zld	vgn	28	24	1	zld	10736095
vgn28_24h_rep2_twi	vgn	28	24	2	twi	21724328
vgn28_24h_rep2_zld	vgn	28	24	2	zld	25005337
vgn28_68h_rep1_bin	vgn	28	68	1	bin	28400130
vgn28_68h_rep1_ctcf	vgn	28	68	1	ctcf	36580939
vgn28_68h_rep1_input	vgn	28	68	1	input	28994327
vgn28_68h_rep1_mef2	vgn	28	68	1	mef2	27045422
vgn28_68h_rep2_bin	vgn	28	68	2	bin	27693127
vgn28_68h_rep2_ctcf	vgn	28	68	2	ctcf	18944684
vgn28_68h_rep2_mef2	vgn	28	68	2	mef2	22865701
vgn307_1012h_rep1_bin	vgn	307	1012	1	bin	27128376
vgn307_1012h_rep1_input	vgn	307	1012	1	input	29329476
vgn307_1012h_rep1_mef2	vgn	307	1012	1	mef2	29596895
vgn307_1012h_rep2_bin	vgn	307	1012	2	bin	25544996
vgn307_1012h_rep2_mef2	vgn	307	1012	2	mef2	20741500
vgn307_24h_rep1_input	vgn	307	24	1	input	14855453
vgn307_24h_rep1_twi	vgn	307	24	1	twi	13086639
vgn307_24h_rep1_zld	vgn	307	24	1	zld	13490471
vgn307_24h_rep2_twi	vgn	307	24	2	twi	20325563
vgn307_24h_rep2_zld	vgn	307	24	2	zld	21120412
vgn307_68h_rep1_bin	vgn	307	68	1	bin	17382404
vgn307_68h_rep1_ctcf	vgn	307	68	1	ctcf	35643937
vgn307_68h_rep1_input	vgn	307	68	1	input	31307252
vgn307_68h_rep1_mef2	vgn	307	68	1	mef2	17091938
vgn307_68h_rep2_bin	vgn	307	68	2	bin	38640976
vgn307_68h_rep2_ctcf	vgn	307	68	2	ctcf	31237026
vgn307_68h_rep2_mef2	vgn	307	68	2	mef2	36470938
vgn399_1012h_rep1_bin	vgn	399	1012	1	bin	25613670
vgn399_1012h_rep1_input	vgn	399	1012	1	input	34692589
vgn399_1012h_rep1_mef2	vgn	399	1012	1	mef2	21423144
vgn399_1012h_rep2_bin	vgn	399	1012	2	bin	23450875
vgn399_1012h_rep2_mef2	vgn	399	1012	2	mef2	17856985
vgn399_24h_rep1_input	vgn	399	24	1	input	30919598
vgn399_24h_rep1_twi	vgn	399	24	1	twi	16486827
vgn399_24h_rep1_zld	vgn	399	24	1	zld	12783244
vgn399_24h_rep2_twi	vgn	399	24	2	twi	52929765
vgn399_24h_rep2_zld	vgn	399	24	2	zld	40223793
vgn399_68h_rep1_bin	vgn	399	68	1	bin	12723917
vgn399_68h_rep1_ctcf	vgn	399	68	1	ctcf	26396345
vgn399_68h_rep1_input	vgn	399	68	1	input	30081607
vgn399_68h_rep1_mef2	vgn	399	68	1	mef2	9357059
vgn399_68h_rep2_bin	vgn	399	68	2	bin	32021167
vgn399_68h_rep2_ctcf	vgn	399	68	2	ctcf	22614651
vgn399_68h_rep2_mef2	vgn	399	68	2	mef2	20558081
vgn57_1012h_rep1_bin	vgn	57	1012	1	bin	41151649
vgn57_1012h_rep1_input	vgn	57	1012	1	input	39424019
vgn57_1012h_rep1_mef2	vgn	57	1012	1	mef2	27580383
vgn57_1012h_rep2_bin	vgn	57	1012	2	bin	21688678
vgn57_1012h_rep2_mef2	vgn	57	1012	2	mef2	21980087
vgn57_24h_rep1_input	vgn	57	24	1	input	29911021
vgn57_24h_rep1_twi	vgn	57	24	1	twi	30742313
vgn57_24h_rep1_zld	vgn	57	24	1	zld	20790650
vgn57_24h_rep2_twi	vgn	57	24	2	twi	19855416
vgn57_24h_rep2_zld	vgn	57	24	2	zld	19807333
vgn57_68h_rep1_bin	vgn	57	68	1	bin	29319379
vgn57_68h_rep1_ctcf	vgn	57	68	1	ctcf	45841809
vgn57_68h_rep1_input	vgn	57	68	1	input	30714902
vgn57_68h_rep1_mef2	vgn	57	68	1	mef2	32373394
vgn57_68h_rep2_bin	vgn	57	68	2	bin	22563698
vgn57_68h_rep2_ctcf	vgn	57	68	2	ctcf	21422941
vgn57_68h_rep2_mef2	vgn	57	68	2	mef2	19758297
vgn639_1012h_rep1_bin	vgn	639	1012	1	bin	31793758
vgn639_1012h_rep1_input	vgn	639	1012	1	input	28829702
vgn639_1012h_rep1_mef2	vgn	639	1012	1	mef2	26151324
vgn639_1012h_rep2_bin	vgn	639	1012	2	bin	31007328
vgn639_1012h_rep2_mef2	vgn	639	1012	2	mef2	32006636
vgn639_24h_rep1_input	vgn	639	24	1	input	28375514
vgn639_24h_rep1_twi	vgn	639	24	1	twi	17128519
vgn639_24h_rep1_zld	vgn	639	24	1	zld	16575537
vgn639_24h_rep2_twi	vgn	639	24	2	twi	27909443
vgn639_24h_rep2_zld	vgn	639	24	2	zld	27390330
vgn639_68h_rep1_bin	vgn	639	68	1	bin	30120353
vgn639_68h_rep1_ctcf	vgn	639	68	1	ctcf	29623070
vgn639_68h_rep1_input	vgn	639	68	1	input	29488186
vgn639_68h_rep1_mef2	vgn	639	68	1	mef2	28542181
vgn639_68h_rep2_bin	vgn	639	68	2	bin	32955470
vgn639_68h_rep2_ctcf	vgn	639	68	2	ctcf	14854731
vgn639_68h_rep2_mef2	vgn	639	68	2	mef2	26096385
vgn712_1012h_rep1_bin	vgn	712	1012	1	bin	36243562
vgn712_1012h_rep1_input	vgn	712	1012	1	input	33046397
vgn712_1012h_rep1_mef2	vgn	712	1012	1	mef2	25745007
vgn712_1012h_rep2_bin	vgn	712	1012	2	bin	7219044
vgn712_1012h_rep2_mef2	vgn	712	1012	2	mef2	31362945
vgn712_24h_rep1_input	vgn	712	24	1	input	34084671
vgn712_24h_rep1_twi	vgn	712	24	1	twi	38567455
vgn712_24h_rep1_zld	vgn	712	24	1	zld	22711407
vgn712_24h_rep2_twi	vgn	712	24	2	twi	21443503
vgn712_24h_rep2_zld	vgn	712	24	2	zld	15956805
vgn712_68h_rep1_bin	vgn	712	68	1	bin	15674883
vgn712_68h_rep1_ctcf	vgn	712	68	1	ctcf	29022126
vgn712_68h_rep1_input	vgn	712	68	1	input	28873463
vgn712_68h_rep1_mef2	vgn	712	68	1	mef2	14158978
vgn712_68h_rep2_bin	vgn	712	68	2	bin	29266147
vgn712_68h_rep2_ctcf	vgn	712	68	2	ctcf	21365008
vgn712_68h_rep2_mef2	vgn	712	68	2	mef2	23244182
vgn714_1012h_rep1_bin	vgn	714	1012	1	bin	28434906
vgn714_1012h_rep1_input	vgn	714	1012	1	input	28121305
vgn714_1012h_rep1_mef2	vgn	714	1012	1	mef2	29413553
vgn714_1012h_rep2_bin	vgn	714	1012	2	bin	22961471
vgn714_1012h_rep2_mef2	vgn	714	1012	2	mef2	22293410
vgn714_24h_rep1_input	vgn	714	24	1	input	29974150
vgn714_24h_rep1_twi	vgn	714	24	1	twi	28546452
vgn714_24h_rep1_zld	vgn	714	24	1	zld	31923666
vgn714_24h_rep2_twi	vgn	714	24	2	twi	14260907
vgn714_24h_rep2_zld	vgn	714	24	2	zld	16273856
vgn714_68h_rep1_bin	vgn	714	68	1	bin	15333233
vgn714_68h_rep1_ctcf	vgn	714	68	1	ctcf	22283862
vgn714_68h_rep1_input	vgn	714	68	1	input	29830921
vgn714_68h_rep1_mef2	vgn	714	68	1	mef2	15684835
vgn714_68h_rep2_bin	vgn	714	68	2	bin	20708003
vgn714_68h_rep2_ctcf	vgn	714	68	2	ctcf	20778041
vgn714_68h_rep2_mef2	vgn	714	68	2	mef2	20989724
vgn852_1012h_rep1_bin	vgn	852	1012	1	bin	29618763
vgn852_1012h_rep1_input	vgn	852	1012	1	input	31791159
vgn852_1012h_rep1_mef2	vgn	852	1012	1	mef2	28015615
vgn852_1012h_rep2_bin	vgn	852	1012	2	bin	26028385
vgn852_1012h_rep2_mef2	vgn	852	1012	2	mef2	17562515
vgn852_24h_rep1_input	vgn	852	24	1	input	26457510
vgn852_24h_rep1_twi	vgn	852	24	1	twi	20070161
vgn852_24h_rep1_zld	vgn	852	24	1	zld	11433195
vgn852_24h_rep2_twi	vgn	852	24	2	twi	22299388
vgn852_24h_rep2_zld	vgn	852	24	2	zld	19009193
vgn852_68h_rep1_bin	vgn	852	68	1	bin	14583080
vgn852_68h_rep1_ctcf	vgn	852	68	1	ctcf	18764845
vgn852_68h_rep1_input	vgn	852	68	1	input	30004840
vgn852_68h_rep1_mef2	vgn	852	68	1	mef2	10918790
vgn852_68h_rep2_bin	vgn	852	68	2	bin	21239016
vgn852_68h_rep2_ctcf	vgn	852	68	2	ctcf	20361903
vgn852_68h_rep2_mef2	vgn	852	68	2	mef2	17138841
vgnDsim_1012h_rep1_input	vgn	Dsim	1012	1	input	27455206
vgnDsim_24h_rep1_input	vgn	Dsim	24	1	input	33236905
vgnDsim_68h_rep1_input	vgn	Dsim	68	1	input	33630704
vgn_1012h_rep1_bin	vgn	vgn	1012	1	bin	30967418
vgn_1012h_rep1_input	vgn	vgn	1012	1	input	28030205
vgn_1012h_rep1_mef2	vgn	vgn	1012	1	mef2	26181732
vgn_1012h_rep2_bin	vgn	vgn	1012	2	bin	20167235
vgn_1012h_rep2_mef2	vgn	vgn	1012	2	mef2	22444677
vgn_24h_rep1_input	vgn	vgn	24	1	input	31814106
vgn_24h_rep1_twi	vgn	vgn	24	1	twi	14407032
vgn_24h_rep1_zld	vgn	vgn	24	1	zld	16352495
vgn_24h_rep2_twi	vgn	vgn	24	2	twi	16861785
vgn_24h_rep2_zld	vgn	vgn	24	2	zld	16564518
vgn_68h_rep1_bin	vgn	vgn	68	1	bin	15259599
vgn_68h_rep1_ctcf	vgn	vgn	68	1	ctcf	19751009
vgn_68h_rep1_input	vgn	vgn	68	1	input	37806225
vgn_68h_rep1_mef2	vgn	vgn	68	1	mef2	11304547
vgn_68h_rep2_bin	vgn	vgn	68	2	bin	15785533
vgn_68h_rep2_ctcf	vgn	vgn	68	2	ctcf	21849965
vgn_68h_rep2_mef2	vgn	vgn	68	2	mef2	20292908

## Sheet: README
Supplemental Table S1: ChIP-seq samples information
Table describing the F1 ChIP-seq samples by replicates, time-points, antibodies and the respective parental lines. Total number of reads is also reported.
