# Supplementary material for: Integrating genetic variation with deep learning provides context for variants impacting transcription factor binding during embryogenesis
Source: Genome Res. 2025 May;35(5):1138–53. doi: 10.1101/gr.279652.124 (PMC12047541; doi:10.1101/gr.279652.124)
Supplement: Supplement 2 [file Supplemental_Table_S2.xlsx]

## Sheet: Consensus peak set
chr	start	end	width	strand	twi_24h	CTCF_68h	Mef2_68h	Mef2_1012h	Bin_68h	Bin_1012h
chr2L	5289	6157	869	*	1	0	1	1	1	1
chr2L	16376	16876	501	*	0	0	0	1	0	0
chr2L	18378	19025	648	*	1	1	1	1	1	1
chr2L	21467	21974	508	*	0	1	0	1	0	0
chr2L	33695	34195	501	*	1	0	0	0	0	0
chr2L	35373	35972	600	*	1	1	1	0	0	0
chr2L	41964	42464	501	*	0	1	0	0	0	0
chr2L	55055	55555	501	*	1	0	0	0	0	0
chr2L	65575	66075	501	*	0	1	0	0	0	0
chr2L	66575	67224	650	*	1	0	0	1	1	1
chr2L	73015	73568	554	*	0	1	0	1	0	0
chr2L	81056	81556	501	*	0	0	0	1	0	0
chr2L	85044	85657	614	*	0	0	1	1	1	1
chr2L	87157	87657	501	*	0	0	0	1	0	0
chr2L	87718	88218	501	*	0	0	1	0	0	0
chr2L	93908	94408	501	*	0	0	0	1	0	0
chr2L	94505	95126	622	*	1	1	1	0	1	1
chr2L	102096	102638	543	*	1	1	1	1	1	1
chr2L	106888	107549	662	*	1	0	0	0	1	0
chr2L	107617	108378	762	*	0	1	1	1	0	0
chr2L	109070	109571	502	*	1	0	0	1	0	0
chr2L	114390	115093	704	*	1	1	1	1	1	0
chr2L	121851	122724	874	*	1	1	0	1	0	0
chr2L	129186	129846	661	*	0	0	1	1	0	0
chr2L	130998	131498	501	*	0	1	0	0	0	0
chr2L	136767	137267	501	*	0	0	0	1	0	0
chr2L	137993	138493	501	*	0	1	0	0	0	0
chr2L	143050	143623	574	*	0	0	1	1	1	1
chr2L	155152	155705	554	*	0	0	0	0	1	1
chr2L	155853	156389	537	*	1	1	1	1	0	0
chr2L	158755	159261	507	*	1	1	0	0	0	0
chr2L	160714	162009	1296	*	1	0	1	1	1	0
chr2L	166471	167022	552	*	0	0	0	1	1	1
chr2L	182562	183148	587	*	1	1	1	1	1	1
chr2L	203495	204026	532	*	1	1	1	1	1	1
chr2L	206821	207629	809	*	1	1	1	1	1	1
chr2L	221060	221560	501	*	0	0	0	1	0	0
chr2L	221611	222111	501	*	0	0	1	0	0	0
chr2L	222595	223095	501	*	1	0	0	0	0	0
chr2L	244755	245255	501	*	0	0	0	0	1	0
chr2L	246561	247061	501	*	0	0	0	1	0	0
chr2L	248289	248806	518	*	0	0	1	1	0	0
chr2L	249041	249541	501	*	1	0	0	0	0	0
chr2L	250541	251288	748	*	0	1	0	0	1	1
chr2L	252106	252644	539	*	1	0	0	1	1	1
chr2L	271494	272000	507	*	1	0	1	1	0	0
chr2L	273429	273937	509	*	1	0	1	1	0	0
chr2L	277035	277551	517	*	1	1	1	1	1	1
chr2L	282977	283495	519	*	0	1	0	1	0	1
chr2L	285477	285986	510	*	0	0	1	1	0	0
chr2L	290322	290845	524	*	0	0	0	0	1	1
chr2L	292159	292685	527	*	0	0	0	1	0	1
chr2L	294763	295357	595	*	1	1	1	1	1	0
chr2L	297468	298102	635	*	1	1	1	1	1	1
chr2L	305460	306078	619	*	1	1	1	1	1	0
chr2L	308077	308577	501	*	0	0	0	0	0	1
chr2L	313037	313537	501	*	0	0	0	0	0	1
chr2L	316906	317406	501	*	0	0	0	1	0	0
chr2L	346108	346766	659	*	0	0	1	1	0	0
chr2L	356073	356573	501	*	1	0	0	0	0	0
chr2L	357646	358233	588	*	1	1	1	1	1	1
chr2L	368581	369081	501	*	0	0	0	1	0	0
chr2L	395309	395827	519	*	1	1	0	1	0	0
chr2L	401949	402483	535	*	0	0	1	1	0	0
chr2L	403572	404399	828	*	1	1	1	1	1	1
chr2L	414519	415135	617	*	1	1	1	1	1	1
chr2L	419588	420258	671	*	1	1	1	1	1	1
chr2L	421169	421825	657	*	1	1	0	0	0	0
chr2L	430808	431308	501	*	0	0	0	0	1	0
chr2L	431405	431905	501	*	1	0	0	0	0	0
chr2L	452751	453341	591	*	1	0	1	1	1	1
chr2L	455241	455741	501	*	1	0	0	0	0	0
chr2L	472109	472609	501	*	0	0	0	1	0	0
chr2L	472649	473303	655	*	0	1	1	0	1	0
chr2L	480882	481504	623	*	1	0	1	1	1	1
chr2L	482604	483118	515	*	0	0	0	0	1	1
chr2L	484162	484874	713	*	0	0	1	1	0	1
chr2L	487177	488094	918	*	0	0	1	1	0	0
chr2L	489957	490605	649	*	1	1	1	1	1	1
chr2L	492159	492659	501	*	0	0	1	0	0	0
chr2L	496406	496906	501	*	0	0	1	0	0	0
chr2L	498365	498865	501	*	0	0	0	1	0	0
chr2L	510447	511058	612	*	1	0	1	1	1	1
chr2L	517820	518320	501	*	1	0	0	0	0	0
chr2L	522375	522875	501	*	1	0	0	0	0	0
chr2L	523336	523889	554	*	0	0	1	1	0	1
chr2L	540431	541030	600	*	1	1	1	1	1	1
chr2L	542250	542750	501	*	0	0	0	1	0	0
chr2L	560133	560633	501	*	0	0	0	1	0	0
chr2L	563935	564443	509	*	1	0	0	1	0	0
chr2L	567876	568567	692	*	1	1	1	1	1	1
chr2L	574155	574771	617	*	1	1	1	1	1	1
chr2L	587863	588363	501	*	1	0	0	0	0	0
chr2L	592629	593129	501	*	1	0	0	0	0	0
chr2L	594583	595201	619	*	1	0	1	1	1	0
chr2L	597825	598325	501	*	1	0	0	0	0	0
chr2L	601352	601852	501	*	1	0	0	0	0	0
chr2L	602206	603057	852	*	0	1	1	1	1	1
chr2L	605407	605907	501	*	1	0	0	0	0	0
chr2L	610092	610592	501	*	1	0	0	0	0	0
chr2L	667439	667939	501	*	1	0	0	0	0	0
chr2L	701633	702196	564	*	0	0	1	1	1	0
chr2L	740012	740540	529	*	1	1	1	1	0	0
chr2L	745633	746192	560	*	0	1	0	0	0	1
chr2L	815652	816238	587	*	1	0	1	1	1	1
chr2L	819200	820204	1005	*	1	1	1	1	1	1
chr2L	821164	821679	516	*	1	1	1	1	1	1
chr2L	825695	826222	528	*	1	1	1	1	0	0
chr2L	826962	827563	602	*	0	0	0	1	0	1
chr2L	833061	833561	501	*	0	1	0	0	0	0
chr2L	839221	839752	532	*	0	0	1	1	0	0
chr2L	845596	846294	699	*	0	0	1	1	0	0
chr2L	846344	846844	501	*	0	0	0	0	0	1
chr2L	849181	849681	501	*	0	0	1	0	0	0
chr2L	850518	851322	805	*	1	1	1	1	1	0
chr2L	852565	853065	501	*	0	0	0	1	0	0
chr2L	855218	855718	501	*	0	1	0	0	0	0
chr2L	855971	856471	501	*	0	0	0	0	1	0
chr2L	865624	866124	501	*	1	0	0	0	0	0
chr2L	867660	868418	759	*	1	0	0	0	1	0
chr2L	870540	872016	1477	*	1	1	1	1	1	1
chr2L	884910	885410	501	*	0	1	0	0	0	0
chr2L	887717	888217	501	*	0	1	0	0	0	0
chr2L	901321	901831	511	*	0	0	1	1	0	0
chr2L	913902	914432	531	*	1	0	0	1	0	0
chr2L	1006524	1007024	501	*	0	1	0	0	0	0
chr2L	1007810	1008310	501	*	0	0	0	1	0	0
chr2L	1036831	1037331	501	*	1	0	0	0	0	0
chr2L	1058691	1059191	501	*	0	0	0	1	0	0
chr2L	1062410	1062997	588	*	0	0	1	1	1	0
chr2L	1063019	1063519	501	*	1	0	0	0	0	0
chr2L	1064430	1065002	573	*	0	0	1	1	0	0
chr2L	1067864	1068375	512	*	0	0	0	0	1	1
chr2L	1068461	1068961	501	*	1	0	0	0	0	0
chr2L	1073588	1074088	501	*	0	0	0	0	0	1
chr2L	1074240	1074747	508	*	0	0	1	1	0	0
chr2L	1076611	1077248	638	*	1	0	0	0	1	0
chr2L	1077591	1078153	563	*	0	1	1	1	0	0
chr2L	1094563	1095063	501	*	0	0	0	1	0	0
chr2L	1108082	1108587	506	*	1	1	1	1	1	1
chr2L	1118043	1118919	877	*	0	1	0	1	0	1
chr2L	1119041	1119564	524	*	1	0	1	0	0	0
chr2L	1123188	1123939	752	*	0	0	1	1	1	1
chr2L	1128726	1129447	722	*	1	1	1	1	1	0
chr2L	1142571	1143252	682	*	0	1	1	1	0	0
chr2L	1147361	1148081	721	*	1	0	1	1	1	1
chr2L	1157610	1158494	885	*	1	1	1	1	0	1
chr2L	1162040	1162669	630	*	0	0	0	1	0	1
chr2L	1164197	1164718	522	*	0	0	1	0	1	0
chr2L	1169826	1170451	626	*	1	1	1	1	1	1
chr2L	1172537	1173156	620	*	1	0	1	1	0	0
chr2L	1177413	1177913	501	*	0	0	0	1	0	0
chr2L	1183622	1184296	675	*	0	1	0	1	0	0
chr2L	1186673	1187173	501	*	0	0	0	1	0	0
chr2L	1228108	1228608	501	*	0	1	0	0	0	0
chr2L	1253944	1254444	501	*	0	1	0	0	0	0
chr2L	1345998	1346498	501	*	0	1	0	0	0	0
chr2L	1362169	1362677	509	*	1	1	0	1	0	0
chr2L	1386827	1387327	501	*	0	0	1	0	0	0
chr2L	1399271	1399850	580	*	0	0	0	1	1	0
chr2L	1404260	1404957	698	*	1	0	0	1	0	0
chr2L	1407175	1407688	514	*	0	0	0	1	0	1
chr2L	1410752	1411566	815	*	1	0	1	0	0	0
chr2L	1413329	1413829	501	*	0	0	0	0	1	0
chr2L	1414130	1414630	501	*	0	0	1	0	0	0
chr2L	1419443	1419943	501	*	0	0	0	1	0	0
chr2L	1420004	1421145	1142	*	1	0	1	0	1	0
chr2L	1426608	1427372	765	*	0	0	1	1	0	0
chr2L	1429445	1429945	501	*	1	0	0	0	0	0
chr2L	1430373	1430896	524	*	0	0	1	1	0	0
chr2L	1433868	1434368	501	*	0	0	0	1	0	0
chr2L	1436165	1436754	590	*	1	0	1	0	0	0
chr2L	1437048	1437548	501	*	0	0	0	0	0	1
chr2L	1439694	1440692	999	*	1	0	0	0	1	1
chr2L	1443620	1444120	501	*	0	0	0	1	0	0
chr2L	1446338	1447312	975	*	0	0	0	1	1	0
chr2L	1451844	1452580	737	*	1	0	0	1	0	1
chr2L	1456942	1457442	501	*	1	0	0	0	0	0
chr2L	1461892	1462642	751	*	1	0	1	1	0	0
chr2L	1471230	1471801	572	*	0	0	1	1	1	0
chr2L	1491686	1492638	953	*	1	1	0	0	0	0
chr2L	1502644	1503169	526	*	1	0	0	1	1	1
chr2L	1504221	1504852	632	*	1	1	1	1	0	1
chr2L	1518021	1518521	501	*	1	0	0	0	0	0
chr2L	1532182	1532682	501	*	0	0	0	1	0	0
chr2L	1610846	1611346	501	*	0	0	0	0	1	0
chr2L	1613897	1614407	511	*	0	1	1	1	0	0
chr2L	1643652	1644152	501	*	0	0	0	1	0	0
chr2L	1649348	1649848	501	*	0	0	0	0	0	1
chr2L	1654164	1654716	553	*	0	0	1	1	0	1
chr2L	1657070	1657576	507	*	1	0	0	1	0	0
chr2L	1669640	1670140	501	*	1	0	0	0	0	0
chr2L	1688265	1688765	501	*	1	0	0	0	0	0
chr2L	1704627	1705274	648	*	1	1	1	1	1	1
chr2L	1708832	1709332	501	*	0	0	0	0	0	1
chr2L	1710204	1710704	501	*	0	0	0	0	0	1
chr2L	1715544	1716099	556	*	0	1	0	0	1	0
chr2L	1722956	1723597	642	*	0	0	1	1	1	1
chr2L	1724122	1724634	513	*	1	1	0	0	0	0
chr2L	1727595	1729011	1417	*	1	0	1	1	1	1
chr2L	1732246	1732746	501	*	0	0	1	0	0	0
chr2L	1735150	1735651	502	*	0	0	1	1	0	0
chr2L	1751832	1752347	516	*	1	1	1	1	1	1
chr2L	1758296	1758796	501	*	1	0	0	0	0	0
chr2L	1861286	1861786	501	*	0	0	0	0	0	1
chr2L	1884252	1884864	613	*	1	1	1	1	0	1
chr2L	1892874	1893374	501	*	1	0	0	0	0	0
chr2L	1902210	1902710	501	*	0	1	0	0	0	0
chr2L	1909675	1910206	532	*	1	1	1	0	0	0
chr2L	1937941	1938446	506	*	0	0	1	1	0	0
chr2L	1954481	1955020	540	*	1	0	1	0	0	0
chr2L	1962081	1962581	501	*	1	0	0	0	0	0
chr2L	1970350	1970876	527	*	1	0	1	1	0	0
chr2L	1972583	1973094	512	*	1	0	1	1	0	0
chr2L	1973918	1974418	501	*	0	0	0	1	0	0
chr2L	1979319	1979819	501	*	1	0	0	0	0	0
chr2L	1980523	1981032	510	*	1	1	1	1	1	1
chr2L	1981964	1982475	512	*	1	0	1	1	0	0
chr2L	1987532	1988056	525	*	1	0	0	1	0	0
chr2L	2009568	2010456	889	*	1	1	0	1	0	0
chr2L	2010701	2011201	501	*	0	0	1	0	0	0
chr2L	2013703	2014203	501	*	1	0	0	0	0	0
chr2L	2031370	2031884	515	*	1	0	1	1	0	0
chr2L	2037375	2037961	587	*	1	1	1	1	1	1
chr2L	2045163	2045722	560	*	1	1	1	1	1	1
chr2L	2093485	2093985	501	*	1	0	0	0	0	0
chr2L	2130070	2130795	726	*	1	1	1	1	0	1
chr2L	2144913	2145432	520	*	1	1	1	1	0	0
chr2L	2147054	2147584	531	*	1	0	1	1	1	1
chr2L	2151510	2152017	508	*	1	1	1	1	1	1
chr2L	2163103	2163776	674	*	1	0	0	1	0	1
chr2L	2171066	2171711	646	*	0	0	1	1	0	1
chr2L	2173062	2173562	501	*	1	0	0	0	0	0
chr2L	2178244	2178744	501	*	0	0	0	0	1	0
chr2L	2180696	2181196	501	*	0	0	0	1	0	0
chr2L	2181334	2181834	501	*	0	0	1	0	0	0
chr2L	2182021	2182521	501	*	1	0	0	0	0	0
chr2L	2192136	2192798	663	*	1	1	1	1	1	1
chr2L	2193332	2193847	516	*	1	0	0	1	0	0
chr2L	2196682	2197621	940	*	1	0	1	1	1	1
chr2L	2201597	2202695	1099	*	1	0	1	0	1	0
chr2L	2213802	2214530	729	*	1	1	1	1	1	1
chr2L	2217024	2217545	522	*	1	0	1	1	1	1
chr2L	2220487	2221228	742	*	1	0	1	1	0	1
chr2L	2226092	2226981	890	*	1	1	1	1	1	1
chr2L	2236657	2237196	540	*	0	0	0	1	1	1
chr2L	2279237	2279737	501	*	0	0	0	0	0	1
chr2L	2322697	2323197	501	*	1	0	0	0	0	0
chr2L	2357139	2357639	501	*	0	0	0	0	1	0
chr2L	2364650	2365458	809	*	1	1	1	1	1	1
chr2L	2374324	2374949	626	*	1	1	0	1	1	0
chr2L	2375015	2376511	1497	*	1	1	1	1	1	1
chr2L	2380818	2381369	552	*	1	1	1	1	0	0
chr2L	2382849	2383396	548	*	0	1	1	1	1	1
chr2L	2420331	2420845	515	*	0	1	1	1	1	0
chr2L	2436815	2437315	501	*	0	0	0	0	0	1
chr2L	2437410	2437910	501	*	0	0	0	0	1	0
chr2L	2442403	2442903	501	*	0	0	0	0	1	0
chr2L	2445521	2446041	521	*	0	0	1	0	1	1
chr2L	2447910	2448410	501	*	1	0	0	0	0	0
chr2L	2456612	2457112	501	*	1	0	0	0	0	0
chr2L	2462328	2462852	525	*	0	0	1	1	0	0
chr2L	2492640	2493181	542	*	1	1	1	1	0	1
chr2L	2493809	2494309	501	*	0	0	0	0	1	0
chr2L	2529486	2529986	501	*	0	0	0	1	0	0
chr2L	2574804	2575358	555	*	1	1	1	1	1	1
chr2L	2576525	2577285	761	*	1	0	1	0	0	0
chr2L	2579894	2580549	656	*	1	1	1	1	1	0
chr2L	2585154	2585778	625	*	0	1	1	1	1	1
chr2L	2677465	2677965	501	*	0	0	0	1	0	0
chr2L	2732855	2733365	511	*	0	0	0	0	1	1
chr2L	2739763	2740266	504	*	0	1	0	0	1	0
chr2L	2744871	2745371	501	*	1	0	0	0	0	0
chr2L	2748456	2748974	519	*	0	0	1	1	1	0
chr2L	2750528	2751028	501	*	1	0	0	0	0	0
chr2L	2753529	2754544	1016	*	0	0	1	1	1	1
chr2L	2755245	2755745	501	*	1	0	0	0	0	0
chr2L	2759548	2760144	597	*	1	1	1	1	1	0
chr2L	2765443	2765943	501	*	0	0	0	1	0	0
chr2L	2767626	2768162	537	*	1	0	0	0	1	1
chr2L	2769823	2770391	569	*	1	1	1	1	1	1
chr2L	2804618	2805121	504	*	0	0	0	0	1	1
chr2L	2834537	2835042	506	*	0	1	0	1	0	0
chr2L	2855835	2856702	868	*	1	1	0	1	0	1
chr2L	2859898	2860398	501	*	0	0	1	0	0	0
chr2L	2860613	2861113	501	*	0	0	0	0	1	0
chr2L	2862396	2862903	508	*	1	0	0	1	0	0
chr2L	2874058	2875030	973	*	1	1	1	1	1	0
chr2L	2877983	2878541	559	*	1	0	0	1	0	0
chr2L	2878738	2879263	526	*	0	0	0	0	1	1
chr2L	2882905	2883405	501	*	1	0	0	0	0	0
chr2L	2885206	2886127	922	*	1	1	1	1	1	1
chr2L	2889046	2889639	594	*	1	0	1	1	0	0
chr2L	2897024	2898185	1162	*	1	0	1	1	1	1
chr2L	2899454	2899957	504	*	0	0	0	1	0	1
chr2L	2906032	2906532	501	*	0	0	1	0	0	0
chr2L	2908672	2909172	501	*	1	0	0	0	0	0
chr2L	2931805	2932333	529	*	0	0	0	1	0	1
chr2L	2935721	2936259	539	*	0	0	1	0	0	1
chr2L	2945718	2946298	581	*	1	0	1	0	0	0
chr2L	2954351	2954851	501	*	1	0	0	0	0	0
chr2L	2955563	2956063	501	*	0	0	0	1	0	0
chr2L	2956985	2957485	501	*	0	1	0	0	0	0
chr2L	2958894	2959394	501	*	0	0	0	1	0	0
chr2L	2966832	2967332	501	*	0	1	0	0	0	0
chr2L	2972363	2973133	771	*	1	1	1	1	1	1
chr2L	2976733	2977306	574	*	0	0	1	1	0	0
chr2L	2979012	2979548	537	*	1	0	1	1	1	0
chr2L	2987550	2988360	811	*	1	0	1	1	1	1
chr2L	2988866	2989366	501	*	0	0	0	0	0	1
chr2L	2992533	2993241	709	*	1	1	1	1	1	1
chr2L	2999019	2999985	967	*	1	1	1	1	1	1
chr2L	3006112	3006612	501	*	1	0	0	0	0	0
chr2L	3018060	3018560	501	*	0	0	0	1	0	0
chr2L	3028922	3030261	1340	*	1	1	1	1	1	1
chr2L	3030268	3030778	511	*	1	1	0	1	0	0
chr2L	3034929	3035429	501	*	0	1	0	0	0	0
chr2L	3037119	3037759	641	*	1	0	0	1	1	1
chr2L	3039763	3040357	595	*	1	1	1	1	1	1
chr2L	3041922	3042422	501	*	0	0	0	1	0	0
chr2L	3058382	3058882	501	*	0	0	0	0	0	1
chr2L	3059200	3059700	501	*	1	0	0	0	0	0
chr2L	3071751	3072251	501	*	1	0	0	0	0	0
chr2L	3080198	3080910	713	*	1	0	1	0	0	0
chr2L	3083466	3083966	501	*	1	0	0	0	0	0
chr2L	3084489	3084989	501	*	0	0	0	0	0	1
chr2L	3088108	3088608	501	*	0	0	0	0	0	1
chr2L	3094812	3095363	552	*	1	1	1	1	0	0
chr2L	3101054	3101554	501	*	0	0	1	0	0	0
chr2L	3108187	3108749	563	*	0	1	1	1	0	0
chr2L	3116063	3116563	501	*	0	0	0	1	0	0
chr2L	3121565	3122065	501	*	0	0	0	1	0	0
chr2L	3131642	3132142	501	*	0	0	0	1	0	0
chr2L	3144608	3145146	539	*	1	1	1	1	0	1
chr2L	3145486	3145986	501	*	0	0	0	0	1	0
chr2L	3152913	3153667	755	*	0	0	1	1	1	1
chr2L	3158535	3159538	1004	*	1	1	1	1	1	1
chr2L	3163408	3163913	506	*	1	1	1	1	0	0
chr2L	3164540	3165055	516	*	0	0	1	1	0	0
chr2L	3169344	3169873	530	*	0	0	1	1	0	0
chr2L	3170579	3171412	834	*	1	0	1	1	1	1
chr2L	3172549	3173359	811	*	1	0	1	1	1	1
chr2L	3183120	3183620	501	*	0	1	0	0	0	0
chr2L	3265559	3266059	501	*	0	0	0	0	1	0
chr2L	3290924	3291424	501	*	0	1	0	0	0	0
chr2L	3300631	3301131	501	*	0	0	0	0	1	0
chr2L	3302054	3302657	604	*	1	0	1	1	0	1
chr2L	3303456	3303956	501	*	0	1	0	0	0	0
chr2L	3319642	3320182	541	*	1	1	1	1	1	1
chr2L	3339187	3339788	602	*	0	0	1	1	0	1
chr2L	3354659	3355159	501	*	0	0	0	1	0	0
chr2L	3373119	3373706	588	*	1	1	1	1	1	1
chr2L	3376648	3377243	596	*	1	1	1	1	0	1
chr2L	3422784	3423284	501	*	0	0	0	0	1	0
chr2L	3452248	3452754	507	*	0	0	1	1	0	0
chr2L	3456832	3457385	554	*	1	0	1	1	1	1
chr2L	3465841	3466363	523	*	1	1	1	1	1	1
chr2L	3469754	3470329	576	*	1	1	1	1	1	1
chr2L	3472180	3472725	546	*	1	1	1	1	0	0
chr2L	3477842	3478657	816	*	0	0	1	1	1	1
chr2L	3480025	3480887	863	*	0	1	0	1	0	0
chr2L	3490892	3491392	501	*	0	1	0	0	0	0
chr2L	3504738	3505238	501	*	1	0	0	0	0	0
chr2L	3514373	3514967	595	*	1	1	1	1	0	0
chr2L	3524264	3524990	727	*	0	0	0	1	0	1
chr2L	3530186	3530686	501	*	0	1	0	0	0	0
chr2L	3533286	3533786	501	*	1	0	0	0	0	0
chr2L	3538253	3538753	501	*	0	0	0	0	0	1
chr2L	3539325	3539829	505	*	1	0	1	0	0	0
chr2L	3539966	3540466	501	*	0	0	0	1	0	0
chr2L	3541873	3542373	501	*	1	0	0	0	0	0
chr2L	3547416	3547916	501	*	1	0	0	0	0	0
chr2L	3549593	3550093	501	*	1	0	0	0	0	0
chr2L	3562654	3563154	501	*	0	0	0	0	0	1
chr2L	3564236	3564736	501	*	0	1	0	0	0	0
chr2L	3570413	3570956	544	*	0	0	1	0	1	1
chr2L	3572566	3573066	501	*	0	0	0	1	0	0
chr2L	3580797	3581302	506	*	1	0	0	1	0	0
chr2L	3594152	3594652	501	*	1	0	0	0	0	0
chr2L	3602582	3603082	501	*	1	0	0	0	0	0
chr2L	3606422	3606949	528	*	0	0	1	1	0	0
chr2L	3608799	3609425	627	*	1	0	0	0	1	0
chr2L	3612862	3613657	796	*	1	0	1	0	1	1
chr2L	3616517	3617017	501	*	1	0	0	0	0	0
chr2L	3618601	3619477	877	*	1	1	0	0	0	0
chr2L	3628712	3629334	623	*	1	0	0	0	1	0
chr2L	3630295	3630795	501	*	0	0	0	0	0	1
chr2L	3631911	3632609	699	*	0	1	1	1	0	0
chr2L	3632754	3633254	501	*	1	0	0	0	0	0
chr2L	3642204	3642704	501	*	0	0	0	1	0	0
chr2L	3655552	3656305	754	*	0	0	1	1	0	1
chr2L	3657049	3657716	668	*	1	1	0	0	1	0
chr2L	3662282	3662802	521	*	0	0	1	1	0	0
chr2L	3673518	3674018	501	*	1	0	0	0	0	0
chr2L	3681562	3682161	600	*	1	0	0	0	1	0
chr2L	3711461	3712024	564	*	1	1	1	1	1	1
chr2L	3712882	3713604	723	*	0	1	1	1	0	0
chr2L	3719146	3719646	501	*	0	0	0	0	0	1
chr2L	3765921	3766431	511	*	0	0	1	1	0	0
chr2L	3771377	3771939	563	*	1	0	1	0	0	0
chr2L	3772122	3772622	501	*	0	0	0	1	0	0
chr2L	3776406	3776906	501	*	0	0	0	0	1	0
chr2L	3786156	3786675	520	*	1	1	1	1	0	0
chr2L	3802741	3803241	501	*	0	1	0	0	0	0
chr2L	3803603	3804199	597	*	1	0	1	1	0	1
chr2L	3806274	3806774	501	*	1	0	0	0	0	0
chr2L	3813136	3813649	514	*	1	1	0	1	0	0
chr2L	3813918	3814418	501	*	0	0	1	0	0	0
chr2L	3818270	3819054	785	*	1	0	1	0	1	0
chr2L	3822817	3823317	501	*	1	0	0	0	0	0
chr2L	3825311	3825873	563	*	0	0	1	1	1	0
chr2L	3827869	3828518	650	*	1	0	1	1	1	1
chr2L	3832106	3832764	659	*	1	0	1	1	1	0
chr2L	3833817	3834317	501	*	1	0	0	0	0	0
chr2L	3835290	3835790	501	*	0	0	0	1	0	0
chr2L	3836162	3836888	727	*	1	0	1	0	1	1
chr2L	3849436	3849936	501	*	1	0	0	0	0	0
chr2L	3855369	3856537	1169	*	0	0	1	1	1	1
chr2L	3860607	3861107	501	*	1	0	0	0	0	0
chr2L	3862603	3863157	555	*	1	0	0	1	0	0
chr2L	3867469	3867979	511	*	1	1	1	1	1	1
chr2L	3872266	3872825	560	*	0	0	1	1	0	0
chr2L	3885411	3885911	501	*	0	0	0	0	0	1
chr2L	3889975	3890499	525	*	0	1	0	0	0	1
chr2L	3893292	3893792	501	*	0	1	0	0	0	0
chr2L	3986545	3987045	501	*	0	1	0	0	0	0
chr2L	4019692	4020203	512	*	1	1	1	1	0	0
chr2L	4027395	4028062	668	*	0	0	1	1	1	1
chr2L	4030212	4030712	501	*	0	0	0	0	0	1
chr2L	4031197	4032069	873	*	1	0	0	1	1	0
chr2L	4034193	4034693	501	*	0	0	1	0	0	0
chr2L	4042595	4043247	653	*	1	0	0	1	1	1
chr2L	4045372	4046033	662	*	0	0	1	1	1	1
chr2L	4054777	4055277	501	*	0	0	0	1	0	0
chr2L	4055565	4056154	590	*	1	0	1	0	0	0
chr2L	4056405	4056905	501	*	0	0	0	0	1	0
chr2L	4056983	4057483	501	*	0	0	0	1	0	0
chr2L	4060425	4061126	702	*	0	0	1	1	0	0
chr2L	4089321	4089821	501	*	0	0	0	0	0	1
chr2L	4091756	4092395	640	*	1	0	1	1	1	0
chr2L	4093563	4094063	501	*	0	0	0	1	0	0
chr2L	4096093	4096593	501	*	1	0	0	0	0	0
chr2L	4123719	4124219	501	*	1	0	0	0	0	0
chr2L	4187468	4188074	607	*	1	1	1	1	1	1
chr2L	4196200	4196700	501	*	0	1	0	0	0	0
chr2L	4197804	4198304	501	*	0	0	0	1	0	0
chr2L	4221165	4221665	501	*	1	0	0	0	0	0
chr2L	4226702	4227949	1248	*	1	1	1	1	0	0
chr2L	4281909	4282409	501	*	1	0	0	0	0	0
chr2L	4287103	4287603	501	*	1	0	0	0	0	0
chr2L	4332238	4332738	501	*	1	0	0	0	0	0
chr2L	4333031	4333862	832	*	0	0	1	1	1	0
chr2L	4335859	4336359	501	*	1	0	0	0	0	0
chr2L	4345420	4346153	734	*	1	1	1	1	1	0
chr2L	4346615	4347176	562	*	0	0	1	1	0	0
chr2L	4349432	4350205	774	*	0	0	0	1	0	1
chr2L	4350587	4351540	954	*	1	0	1	0	1	0
chr2L	4363478	4364077	600	*	0	0	1	0	1	0
chr2L	4368756	4369383	628	*	1	0	0	0	0	1
chr2L	4375723	4376223	501	*	0	0	1	0	0	0
chr2L	4376429	4376988	560	*	0	0	0	1	0	1
chr2L	4377233	4377733	501	*	0	0	0	0	1	0
chr2L	4378307	4378807	501	*	1	0	0	0	0	0
chr2L	4382456	4382973	518	*	1	0	1	1	1	1
chr2L	4386801	4387597	797	*	1	0	0	0	1	1
chr2L	4393608	4394398	791	*	1	1	1	1	1	0
chr2L	4396413	4396913	501	*	0	0	0	1	0	0
chr2L	4402944	4403532	589	*	1	0	0	1	1	1
chr2L	4417937	4418462	526	*	1	1	1	1	0	0
chr2L	4418858	4419367	510	*	0	0	1	1	0	0
chr2L	4442232	4442766	535	*	1	0	1	1	1	1
chr2L	4444450	4445013	564	*	1	0	0	0	1	0
chr2L	4448541	4449185	645	*	1	0	0	0	1	0
chr2L	4454221	4454780	560	*	1	1	1	1	1	1
chr2L	4456567	4457067	501	*	0	0	0	1	0	0
chr2L	4458105	4459212	1108	*	1	1	1	1	0	0
chr2L	4459488	4460121	634	*	0	1	0	0	1	1
chr2L	4463271	4463803	533	*	1	1	1	1	1	1
chr2L	4464893	4465413	521	*	1	0	0	1	1	1
chr2L	4648650	4649150	501	*	1	0	0	0	0	0
chr2L	4660811	4661332	522	*	1	1	0	1	0	0
chr2L	4687147	4687647	501	*	1	0	0	0	0	0
chr2L	4691306	4691806	501	*	0	0	0	0	0	1
chr2L	4725972	4726591	620	*	1	1	1	1	0	0
chr2L	4794405	4794913	509	*	1	1	1	1	1	1
chr2L	4809924	4810424	501	*	1	0	0	0	0	0
chr2L	4810886	4811386	501	*	0	0	0	1	0	0
chr2L	4817944	4818494	551	*	1	1	1	1	1	1
chr2L	4823748	4824248	501	*	1	0	0	0	0	0
chr2L	4835324	4835824	501	*	0	0	0	1	0	0
chr2L	4837719	4838246	528	*	1	1	1	1	1	1
chr2L	4846635	4847966	1332	*	1	1	1	1	1	1
chr2L	4850211	4850882	672	*	1	0	1	1	1	1
chr2L	4852466	4853014	549	*	1	1	0	0	0	0
chr2L	4880413	4880913	501	*	0	0	0	1	0	0
chr2L	4882551	4883333	783	*	1	1	1	1	1	1
chr2L	4886324	4887052	729	*	0	0	1	1	0	1
chr2L	4889386	4889886	501	*	1	0	0	0	0	0
chr2L	4891984	4892622	639	*	1	0	1	1	1	1
chr2L	4896753	4897253	501	*	0	0	0	0	1	0
chr2L	4898287	4898787	501	*	0	0	1	0	0	0
chr2L	4902312	4902812	501	*	1	0	0	0	0	0
chr2L	4908055	4908555	501	*	0	0	0	1	0	0
chr2L	4945276	4945845	570	*	0	0	1	1	1	1
chr2L	4949488	4949989	502	*	0	0	0	0	1	1
chr2L	4955238	4955846	609	*	1	1	1	0	1	1
chr2L	4967508	4968008	501	*	0	0	0	1	0	0
chr2L	4971227	4971757	531	*	1	1	1	1	1	1
chr2L	4973734	4974258	525	*	1	0	1	1	1	1
chr2L	4981334	4981867	534	*	1	1	1	1	1	1
chr2L	4997336	4997836	501	*	0	0	0	0	0	1
chr2L	5000185	5001750	1566	*	1	1	1	1	1	0
chr2L	5003755	5004359	605	*	1	1	1	0	0	0
chr2L	5006177	5006883	707	*	0	0	1	1	0	1
chr2L	5009362	5010032	671	*	1	1	1	1	1	1
chr2L	5010592	5011307	716	*	1	0	0	1	0	0
chr2L	5024443	5024970	528	*	0	0	1	1	0	0
chr2L	5027242	5027754	513	*	0	0	1	1	0	0
chr2L	5029360	5029860	501	*	0	0	0	1	0	0
chr2L	5036042	5036542	501	*	0	1	0	0	0	0
chr2L	5042054	5042554	501	*	0	0	0	0	1	0
chr2L	5042604	5043520	917	*	0	1	1	1	0	1
chr2L	5043940	5044440	501	*	1	0	0	0	0	0
chr2L	5045223	5045723	501	*	0	0	0	1	0	0
chr2L	5052518	5053082	565	*	1	0	1	1	1	1
chr2L	5054896	5055429	534	*	1	0	1	1	1	1
chr2L	5059510	5060059	550	*	1	1	1	1	1	1
chr2L	5070721	5071254	534	*	1	1	1	1	0	0
chr2L	5073353	5073853	501	*	0	0	0	0	1	0
chr2L	5084035	5084687	653	*	0	0	0	1	0	1
chr2L	5092959	5094122	1164	*	1	1	1	1	1	1
chr2L	5096149	5096713	565	*	1	0	1	1	1	1
chr2L	5099939	5100669	731	*	1	0	1	0	1	1
chr2L	5101001	5101501	501	*	0	0	0	1	0	0
chr2L	5105052	5105552	501	*	0	0	1	0	0	0
chr2L	5106756	5107256	501	*	0	0	0	0	0	1
chr2L	5113103	5113929	827	*	1	0	0	0	1	0
chr2L	5114243	5114743	501	*	0	0	0	1	0	0
chr2L	5116469	5117083	615	*	0	0	0	1	0	1
chr2L	5144812	5145312	501	*	1	0	0	0	0	0
chr2L	5149823	5150344	522	*	0	0	0	1	0	1
chr2L	5156398	5156911	514	*	0	0	1	1	0	1
chr2L	5160853	5161353	501	*	1	0	0	0	0	0
chr2L	5209174	5209949	776	*	1	0	0	0	1	1
chr2L	5225488	5225988	501	*	0	0	0	1	0	0
chr2L	5233290	5233790	501	*	1	0	0	0	0	0
chr2L	5234651	5235151	501	*	0	0	0	1	1	0
chr2L	5238230	5238730	501	*	0	0	0	0	1	0
chr2L	5239408	5240106	699	*	1	0	0	0	0	1
chr2L	5240398	5240914	517	*	0	0	1	1	0	0
chr2L	5245043	5245945	903	*	0	0	1	1	1	1
chr2L	5268244	5268744	501	*	0	0	0	0	0	1
chr2L	5270613	5271428	816	*	1	1	1	1	1	1
chr2L	5277775	5278275	501	*	1	0	0	0	0	0
chr2L	5278292	5278846	555	*	0	1	1	1	1	0
chr2L	5288631	5289141	511	*	0	0	0	0	1	1
chr2L	5291031	5291531	501	*	0	0	0	0	1	0
chr2L	5292494	5292994	501	*	0	0	1	0	0	0
chr2L	5293308	5293808	501	*	0	0	0	1	0	0
chr2L	5299404	5299904	501	*	0	0	0	1	0	0
chr2L	5300471	5300971	501	*	0	1	0	0	0	0
chr2L	5305381	5305881	501	*	0	0	0	0	1	0
chr2L	5305890	5307034	1145	*	1	0	0	1	0	1
chr2L	5324764	5325984	1221	*	1	1	0	1	0	1
chr2L	5326060	5326982	923	*	0	1	1	0	1	0
chr2L	5329004	5329504	501	*	0	1	0	0	0	0
chr2L	5340977	5341477	501	*	1	0	0	0	0	0
chr2L	5362278	5362778	501	*	0	0	0	1	0	0
chr2L	5365690	5366328	639	*	0	1	1	1	1	1
chr2L	5366902	5367402	501	*	1	0	0	0	0	0
chr2L	5377117	5377617	501	*	1	0	0	0	0	0
chr2L	5381204	5381704	501	*	1	0	0	0	0	0
chr2L	5400845	5401345	501	*	1	0	0	0	0	0
chr2L	5403431	5404128	698	*	1	0	1	1	1	1
chr2L	5410256	5410756	501	*	1	0	0	0	0	0
chr2L	5412370	5412870	501	*	1	0	0	0	0	0
chr2L	5423234	5423734	501	*	0	0	1	0	0	0
chr2L	5423899	5424399	501	*	0	0	0	1	0	0
chr2L	5453360	5454125	766	*	1	0	0	1	1	0
chr2L	5455896	5456862	967	*	1	0	1	0	0	0
chr2L	5459528	5460135	608	*	1	0	0	0	1	0
chr2L	5461089	5461650	562	*	1	0	1	1	1	1
chr2L	5468472	5469138	667	*	0	0	1	1	0	0
chr2L	5472494	5472994	501	*	0	0	0	0	1	0
chr2L	5473519	5474019	501	*	1	0	0	0	0	0
chr2L	5480263	5480763	501	*	0	0	0	0	1	0
chr2L	5519639	5520253	615	*	1	1	1	1	1	1
chr2L	5524038	5524547	510	*	1	1	1	1	1	1
chr2L	5525668	5526174	507	*	0	0	0	0	1	1
chr2L	5527814	5528327	514	*	1	0	1	1	1	0
chr2L	5531969	5532472	504	*	0	0	1	1	0	0
chr2L	5541989	5543246	1258	*	1	1	1	1	1	1
chr2L	5546577	5547419	843	*	1	0	1	1	1	1
chr2L	5550700	5551200	501	*	1	0	0	0	0	0
chr2L	5558978	5560459	1482	*	0	0	1	1	1	1
chr2L	5629901	5630401	501	*	1	0	0	0	0	0
chr2L	5720856	5721379	524	*	0	0	0	0	1	1
chr2L	5723826	5724326	501	*	0	1	0	0	0	0
chr2L	5724410	5724944	535	*	1	0	1	1	0	1
chr2L	5730699	5731199	501	*	1	0	0	0	0	0
chr2L	5739237	5739737	501	*	1	0	0	0	0	0
chr2L	5748821	5749321	501	*	1	0	0	0	0	0
chr2L	5771183	5771685	503	*	0	1	1	1	0	0
chr2L	5780640	5781140	501	*	1	0	0	0	0	0
chr2L	5783054	5783556	503	*	0	0	1	1	0	0
chr2L	5789146	5789646	501	*	1	0	0	0	0	0
chr2L	5799544	5800580	1037	*	0	1	1	1	1	1
chr2L	5801737	5802403	667	*	0	1	1	1	0	0
chr2L	5805018	5805518	501	*	0	1	0	0	0	0
chr2L	5827493	5827993	501	*	0	0	1	0	0	0
chr2L	5836475	5836975	501	*	0	0	1	0	0	0
chr2L	5870896	5871396	501	*	1	0	0	0	0	0
chr2L	5874199	5874755	557	*	0	0	1	1	0	0
chr2L	5879229	5879825	597	*	1	0	1	1	1	1
chr2L	5896236	5896736	501	*	0	0	0	0	0	1
chr2L	5902836	5903460	625	*	1	0	1	1	1	1
chr2L	5906952	5907868	917	*	1	0	1	1	1	1
chr2L	5929778	5930278	501	*	0	0	0	0	0	1
chr2L	5943396	5944177	782	*	1	1	0	0	1	1
chr2L	5944332	5944832	501	*	0	0	0	1	0	0
chr2L	5948723	5949718	996	*	1	1	1	1	1	1
chr2L	5961599	5962129	531	*	1	0	0	0	1	0
chr2L	5964693	5965193	501	*	0	0	0	1	0	0
chr2L	5968342	5968842	501	*	0	0	1	0	0	0
chr2L	5972464	5973105	642	*	0	0	1	1	1	1
chr2L	5980643	5981143	501	*	0	0	0	1	0	0
chr2L	5981254	5981902	649	*	1	1	1	0	1	0
chr2L	5983349	5983849	501	*	1	0	0	0	0	0
chr2L	5986031	5986787	757	*	1	1	1	1	0	0
chr2L	5999379	5999879	501	*	0	0	0	1	0	0
chr2L	6012974	6013494	521	*	0	1	1	0	0	0
chr2L	6014729	6015382	654	*	0	0	1	1	0	0
chr2L	6016942	6017972	1031	*	0	0	1	1	1	1
chr2L	6019581	6020235	655	*	1	0	1	1	1	1
chr2L	6024256	6024765	510	*	1	1	1	1	1	1
chr2L	6036650	6037150	501	*	1	0	0	0	0	0
chr2L	6037620	6038187	568	*	1	0	0	1	1	1
chr2L	6047693	6048223	531	*	0	0	1	1	1	1
chr2L	6050498	6051161	664	*	1	1	1	1	1	1
chr2L	6062458	6063055	598	*	1	0	1	1	1	1
chr2L	6065718	6066245	528	*	1	0	1	1	1	0
chr2L	6068826	6069363	538	*	1	0	1	1	0	0
chr2L	6075290	6076060	771	*	0	0	1	1	0	0
chr2L	6076148	6076648	501	*	0	0	0	0	0	1
chr2L	6078794	6079379	586	*	1	0	1	1	0	0
chr2L	6088188	6088712	525	*	1	0	1	1	0	0
chr2L	6090094	6090594	501	*	0	0	0	0	0	1
chr2L	6098681	6099207	527	*	1	1	1	1	1	1
chr2L	6100060	6100560	501	*	0	0	0	1	0	0
chr2L	6124874	6125374	501	*	0	1	0	0	0	0
chr2L	6127402	6127907	506	*	0	0	1	1	0	0
chr2L	6133215	6133724	510	*	1	0	1	0	0	0
chr2L	6151033	6151533	501	*	1	0	0	0	0	0
chr2L	6172933	6173433	501	*	0	1	0	0	0	0
chr2L	6177261	6177953	693	*	1	0	1	0	1	0
chr2L	6181608	6182108	501	*	0	0	0	1	0	0
chr2L	6191974	6192474	501	*	0	0	0	1	0	0
chr2L	6193961	6194463	503	*	0	0	0	1	0	1
chr2L	6200887	6201387	501	*	0	0	0	1	0	0
chr2L	6204646	6205270	625	*	1	0	1	0	1	0
chr2L	6211065	6211652	588	*	1	0	1	1	1	1
chr2L	6216154	6216654	501	*	1	0	0	0	0	0
chr2L	6220438	6221399	962	*	0	1	0	1	0	0
chr2L	6221545	6222045	501	*	1	0	0	0	0	0
chr2L	6229272	6229772	501	*	1	0	0	0	0	0
chr2L	6236141	6236891	751	*	0	0	1	1	0	1
chr2L	6240917	6241496	580	*	0	0	1	0	1	0
chr2L	6241920	6242420	501	*	1	0	0	0	0	0
chr2L	6247414	6247914	501	*	1	0	0	0	0	0
chr2L	6251162	6251662	501	*	1	0	0	0	0	0
chr2L	6252162	6252676	515	*	0	0	0	0	1	1
chr2L	6259548	6260048	501	*	1	0	0	0	0	0
chr2L	6277501	6278001	501	*	0	0	0	0	0	1
chr2L	6280165	6280665	501	*	0	1	0	0	0	0
chr2L	6291541	6292084	544	*	0	0	1	1	1	1
chr2L	6301583	6302083	501	*	0	1	0	0	0	0
chr2L	6323439	6324156	718	*	1	1	1	1	1	1
chr2L	6338500	6339590	1091	*	1	1	1	1	1	1
chr2L	6343421	6343938	518	*	1	1	1	1	0	0
chr2L	6356845	6357345	501	*	0	1	0	0	0	0
chr2L	6373120	6373620	501	*	1	0	0	0	0	0
chr2L	6390299	6390799	501	*	1	0	0	0	0	0
chr2L	6391422	6391922	501	*	0	1	0	0	0	0
chr2L	6411103	6411745	643	*	1	0	0	1	0	1
chr2L	6422753	6423265	513	*	0	0	1	1	0	0
chr2L	6455253	6456481	1229	*	1	1	1	1	1	1
chr2L	6467452	6467977	526	*	1	1	1	1	1	1
chr2L	6473224	6474165	942	*	1	1	1	1	1	1
chr2L	6476703	6477208	506	*	1	0	1	1	0	0
chr2L	6480465	6481321	857	*	1	1	1	1	1	1
chr2L	6488825	6489366	542	*	1	1	1	1	1	1
chr2L	6490770	6491346	577	*	1	0	1	1	1	1
chr2L	6494266	6494766	501	*	0	0	0	1	0	0
chr2L	6498261	6498893	633	*	1	1	1	1	0	0
chr2L	6521292	6521792	501	*	0	0	0	1	0	0
chr2L	6526886	6527415	530	*	0	1	1	1	0	0
chr2L	6530958	6532123	1166	*	1	0	1	1	1	0
chr2L	6534400	6534900	501	*	0	0	0	0	1	0
chr2L	6536091	6536613	523	*	0	0	1	1	0	0
chr2L	6543557	6544060	504	*	0	0	1	1	0	0
chr2L	6550013	6550513	501	*	0	0	0	0	1	0
chr2L	6557242	6557768	527	*	1	1	1	1	1	1
chr2L	6561387	6562337	951	*	1	1	1	1	1	1
chr2L	6584313	6584813	501	*	0	1	0	0	0	0
chr2L	6593283	6593783	501	*	0	1	0	0	0	0
chr2L	6610746	6611494	749	*	0	1	0	0	1	1
chr2L	6612040	6612765	726	*	1	0	1	1	0	0
chr2L	6622587	6623115	529	*	1	1	1	1	0	0
chr2L	6647186	6648398	1213	*	1	0	1	1	1	1
chr2L	6648767	6649267	501	*	0	1	0	0	0	0
chr2L	6667766	6668293	528	*	0	0	1	1	1	1
chr2L	6673601	6674223	623	*	1	0	1	1	1	1
chr2L	6677371	6677877	507	*	0	1	0	1	1	1
chr2L	6684139	6685040	902	*	1	1	1	1	1	1
chr2L	6700664	6701164	501	*	1	0	0	0	0	0
chr2L	6701479	6702258	780	*	0	0	1	1	1	1
chr2L	6708866	6709384	519	*	0	0	1	1	0	0
chr2L	6717381	6717906	526	*	1	1	1	1	1	1
chr2L	6722968	6723750	783	*	1	1	1	1	1	1
chr2L	6734505	6735005	501	*	1	0	0	0	0	0
chr2L	6743481	6743981	501	*	0	0	0	0	1	0
chr2L	6751642	6752162	521	*	0	0	1	1	1	1
chr2L	6757260	6757760	501	*	0	0	0	1	0	0
chr2L	6772586	6773086	501	*	0	0	0	1	0	0
chr2L	6787266	6787766	501	*	0	0	0	1	0	0
chr2L	6793992	6794537	546	*	1	0	1	1	0	0
chr2L	6797319	6797887	569	*	1	1	1	1	1	1
chr2L	6799429	6799937	509	*	0	0	1	1	0	0
chr2L	6819039	6819554	516	*	0	0	1	1	0	0
chr2L	6820143	6820643	501	*	1	0	0	0	0	0
chr2L	6821549	6822108	560	*	1	0	1	1	0	0
chr2L	6826223	6826781	559	*	1	0	0	0	1	0
chr2L	6827548	6828048	501	*	1	0	0	0	0	0
chr2L	6830024	6830569	546	*	1	0	1	0	0	0
chr2L	6833617	6834183	567	*	1	0	1	1	0	0
chr2L	6847325	6847825	501	*	1	0	0	0	0	0
chr2L	6849835	6850335	501	*	1	0	0	0	0	0
chr2L	6851767	6852356	590	*	1	1	1	1	1	1
chr2L	6853891	6854413	523	*	1	1	1	1	1	1
chr2L	6907581	6908152	572	*	1	1	1	1	0	0
chr2L	6913909	6914468	560	*	1	1	1	1	1	1
chr2L	6920047	6921029	983	*	0	1	1	1	0	0
chr2L	6921620	6922120	501	*	1	0	0	0	0	0
chr2L	6939717	6940217	501	*	1	0	0	0	0	0
chr2L	6941694	6942476	783	*	0	0	1	1	0	1
chr2L	6944990	6945518	529	*	1	0	1	1	0	0
chr2L	6948508	6949046	539	*	1	0	0	1	1	1
chr2L	6949881	6950565	685	*	0	1	1	1	1	1
chr2L	6956743	6957243	501	*	1	0	0	0	0	0
chr2L	6960083	6960621	539	*	0	0	0	0	1	1
chr2L	6963809	6964472	664	*	1	1	1	1	0	0
chr2L	6966319	6966819	501	*	0	0	0	1	0	0
chr2L	6967320	6968032	713	*	1	1	1	1	1	1
chr2L	6971323	6972117	795	*	1	1	1	1	1	1
chr2L	7013207	7013707	501	*	0	0	0	0	1	0
chr2L	7027014	7027833	820	*	1	0	1	1	1	1
chr2L	7029032	7029534	503	*	1	1	0	0	0	0
chr2L	7032451	7033599	1149	*	1	1	1	1	1	1
chr2L	7037748	7038563	816	*	1	1	1	1	1	1
chr2L	7041999	7043338	1340	*	1	0	1	1	1	1
chr2L	7045769	7046269	501	*	0	0	1	0	0	0
chr2L	7049130	7050609	1480	*	1	0	1	1	1	0
chr2L	7056064	7056629	566	*	1	0	1	1	1	1
chr2L	7065577	7066128	552	*	0	1	1	1	0	0
chr2L	7097322	7097822	501	*	0	1	0	0	0	0
chr2L	7114043	7114543	501	*	0	1	0	0	0	0
chr2L	7116264	7116764	501	*	0	0	0	0	0	1
chr2L	7117115	7117615	501	*	0	0	0	1	0	0
chr2L	7121054	7121554	501	*	0	0	0	1	0	0
chr2L	7123675	7124175	501	*	0	0	1	0	0	0
chr2L	7126298	7126854	557	*	0	0	0	0	1	1
chr2L	7133849	7134349	501	*	1	0	0	0	0	0
chr2L	7135226	7135726	501	*	0	0	0	0	0	1
chr2L	7136680	7137475	796	*	1	0	1	0	0	0
chr2L	7138479	7138979	501	*	1	0	0	0	0	0
chr2L	7143642	7144142	501	*	1	0	0	0	0	0
chr2L	7147795	7148795	1001	*	1	0	0	1	0	0
chr2L	7165227	7165727	501	*	0	0	0	0	0	1
chr2L	7181787	7182564	778	*	1	1	1	1	1	1
chr2L	7188231	7188731	501	*	0	0	0	1	0	0
chr2L	7193153	7193665	513	*	0	0	1	1	1	1
chr2L	7194221	7194900	680	*	1	1	0	1	0	1
chr2L	7203403	7203903	501	*	0	0	0	0	0	1
chr2L	7203910	7204645	736	*	1	1	1	1	1	0
chr2L	7212282	7212782	501	*	1	0	0	0	0	0
chr2L	7215652	7216152	501	*	0	0	0	1	0	0
chr2L	7219652	7220315	664	*	1	1	1	1	1	1
chr2L	7222802	7223305	504	*	1	1	0	0	0	0
chr2L	7226563	7227066	504	*	0	0	1	1	1	0
chr2L	7245227	7245727	501	*	1	0	0	0	0	0
chr2L	7247340	7247840	501	*	1	0	0	0	0	0
chr2L	7254501	7255001	501	*	0	1	0	0	0	0
chr2L	7258028	7258609	582	*	1	1	1	1	0	0
chr2L	7264803	7265303	501	*	0	0	0	0	0	1
chr2L	7267491	7268213	723	*	0	0	1	1	1	0
chr2L	7276865	7277365	501	*	0	0	0	1	0	0
chr2L	7281328	7281894	567	*	1	1	1	1	1	0
chr2L	7290971	7291471	501	*	1	0	0	0	0	0
chr2L	7295287	7295787	501	*	1	0	0	0	0	0
chr2L	7299968	7300736	769	*	1	0	1	0	0	0
chr2L	7306706	7307217	512	*	1	0	1	1	0	0
chr2L	7308912	7309412	501	*	0	0	0	0	1	0
chr2L	7310533	7311033	501	*	1	0	0	0	0	0
chr2L	7313217	7313717	501	*	0	0	0	1	0	0
chr2L	7315447	7315958	512	*	1	1	1	0	0	0
chr2L	7330404	7331060	657	*	0	0	0	1	1	0
chr2L	7340294	7341146	853	*	0	0	0	1	1	1
chr2L	7352837	7353337	501	*	0	1	0	0	0	0
chr2L	7386831	7388426	1596	*	1	1	1	1	1	0
chr2L	7401184	7401992	809	*	0	0	0	1	1	1
chr2L	7402009	7402509	501	*	0	0	1	0	0	0
chr2L	7404857	7405357	501	*	0	0	0	1	0	0
chr2L	7407536	7408184	649	*	0	0	1	1	0	1
chr2L	7409464	7409988	525	*	0	0	1	1	1	0
chr2L	7412161	7412690	530	*	1	1	1	1	1	1
chr2L	7419811	7420535	725	*	1	1	1	1	0	0
chr2L	7423384	7423884	501	*	0	1	0	0	0	0
chr2L	7423944	7424444	501	*	0	0	0	1	0	0
chr2L	7426414	7427120	707	*	1	1	1	1	1	1
chr2L	7436776	7437276	501	*	1	0	0	0	0	0
chr2L	7462322	7462822	501	*	0	0	0	0	1	0
chr2L	7466019	7466519	501	*	0	0	0	0	1	0
chr2L	7483489	7484006	518	*	0	0	1	1	0	0
chr2L	7494510	7495160	651	*	0	0	0	0	1	1
chr2L	7495815	7496632	818	*	1	1	1	1	0	0
chr2L	7505331	7505831	501	*	0	0	1	0	0	0
chr2L	7507488	7507988	501	*	0	0	0	1	0	0
chr2L	7508019	7508519	501	*	0	0	1	0	0	0
chr2L	7508657	7509288	632	*	0	0	0	0	1	1
chr2L	7516288	7516795	508	*	1	0	1	0	0	0
chr2L	7519357	7520585	1229	*	1	0	1	1	0	0
chr2L	7522209	7522757	549	*	0	0	1	1	0	0
chr2L	7525985	7526573	589	*	0	0	1	0	1	0
chr2L	7527299	7527799	501	*	1	0	0	0	0	0
chr2L	7530085	7530808	724	*	0	1	1	1	0	1
chr2L	7534462	7535389	928	*	1	1	0	0	0	0
chr2L	7537146	7537694	549	*	0	0	1	0	1	0
chr2L	7538400	7538900	501	*	0	1	0	0	0	0
chr2L	7543868	7544711	844	*	1	0	1	0	1	1
chr2L	7560539	7561039	501	*	0	0	0	1	0	0
chr2L	7566432	7566943	512	*	0	0	1	1	0	0
chr2L	7568553	7569084	532	*	0	0	0	1	0	1
chr2L	7569435	7569935	501	*	1	0	0	0	0	0
chr2L	7571731	7572664	934	*	0	0	0	1	1	1
chr2L	7576603	7577313	711	*	0	0	1	1	1	1
chr2L	7584732	7585356	625	*	1	0	1	0	1	0
chr2L	7592769	7593269	501	*	1	0	0	0	0	0
chr2L	7596543	7597328	786	*	0	0	1	1	1	0
chr2L	7628265	7628923	659	*	0	0	1	1	1	1
chr2L	7632880	7633380	501	*	1	0	0	0	0	0
chr2L	7635361	7635922	562	*	1	0	0	0	1	0
chr2L	7637310	7637810	501	*	1	0	0	0	0	0
chr2L	7639963	7640463	501	*	1	0	0	0	0	0
chr2L	7641457	7641957	501	*	0	1	0	0	0	0
chr2L	7647076	7647576	501	*	0	0	0	0	1	0
chr2L	7702446	7702946	501	*	1	0	0	0	0	0
chr2L	7711095	7711595	501	*	0	0	0	1	0	0
chr2L	7771957	7772457	501	*	1	0	0	0	0	0
chr2L	7782637	7783201	565	*	1	0	1	1	1	1
chr2L	7799641	7800318	678	*	1	1	1	1	1	1
chr2L	7808783	7809283	501	*	0	1	0	0	0	0
chr2L	7809551	7810410	860	*	0	0	0	1	0	1
chr2L	7811268	7812129	862	*	1	0	1	0	1	0
chr2L	7812662	7813497	836	*	1	0	0	1	0	1
chr2L	7821247	7822015	769	*	1	1	1	1	1	1
chr2L	7827277	7827777	501	*	0	1	0	0	0	0
chr2L	7828002	7828653	652	*	1	0	1	1	1	1
chr2L	7856286	7856810	525	*	1	1	1	1	1	1
chr2L	7857983	7858483	501	*	1	0	0	0	0	0
chr2L	7885186	7885762	577	*	1	1	1	1	1	0
chr2L	7890589	7891140	552	*	1	1	1	1	1	0
chr2L	7900140	7900640	501	*	0	1	0	0	0	0
chr2L	7912488	7913008	521	*	0	0	1	1	0	0
chr2L	7953332	7953832	501	*	0	1	0	0	0	0
chr2L	7976637	7977144	508	*	0	0	1	1	0	0
chr2L	7983924	7984514	591	*	1	1	1	1	1	1
chr2L	7993899	7994533	635	*	1	0	1	1	1	1
chr2L	7998502	7999125	624	*	1	1	1	1	1	1
chr2L	8001894	8002452	559	*	0	0	1	1	1	1
chr2L	8024258	8024758	501	*	0	1	0	0	0	0
chr2L	8029149	8029751	603	*	0	1	1	1	0	0
chr2L	8030112	8031248	1137	*	1	1	1	1	1	1
chr2L	8042589	8043583	995	*	1	1	1	1	0	0
chr2L	8071335	8071842	508	*	1	0	1	1	1	1
chr2L	8072655	8073205	551	*	1	0	1	1	1	1
chr2L	8080800	8081326	527	*	0	0	1	1	0	0
chr2L	8082846	8083746	901	*	1	1	1	1	1	1
chr2L	8087479	8087979	501	*	0	0	1	0	0	0
chr2L	8088469	8088969	501	*	0	0	0	1	0	0
chr2L	8090809	8091334	526	*	0	0	0	0	1	1
chr2L	8091866	8092366	501	*	1	0	0	0	0	0
chr2L	8096316	8096816	501	*	0	0	0	0	1	0
chr2L	8098279	8098823	545	*	1	0	0	1	0	0
chr2L	8103997	8104533	537	*	0	0	1	1	0	0
chr2L	8111956	8112456	501	*	0	0	0	1	0	0
chr2L	8126718	8127296	579	*	1	1	1	1	1	1
chr2L	8128997	8129497	501	*	0	0	1	0	0	0
chr2L	8133929	8134453	525	*	1	1	0	1	0	0
chr2L	8145268	8145768	501	*	1	0	0	0	0	0
chr2L	8156723	8157250	528	*	1	1	1	1	1	1
chr2L	8159377	8159984	608	*	1	1	1	1	0	1
chr2L	8162144	8163016	873	*	1	1	0	0	1	1
chr2L	8163588	8164108	521	*	0	0	1	1	0	0
chr2L	8165945	8166445	501	*	1	0	0	0	0	0
chr2L	8168240	8168740	501	*	0	0	0	1	0	0
chr2L	8184929	8185429	501	*	0	1	0	0	0	0
chr2L	8196666	8197264	599	*	1	1	1	1	1	1
chr2L	8198701	8199224	524	*	1	1	1	1	1	1
chr2L	8204947	8205447	501	*	0	0	0	1	0	0
chr2L	8209324	8209824	501	*	1	0	0	0	0	0
chr2L	8210702	8211553	852	*	0	1	1	1	1	1
chr2L	8212684	8213284	601	*	1	0	1	1	1	1
chr2L	8214028	8214528	501	*	0	0	0	1	0	0
chr2L	8229238	8229738	501	*	0	0	1	0	0	0
chr2L	8232553	8233053	501	*	0	0	0	1	0	0
chr2L	8239291	8240204	914	*	0	1	0	1	0	1
chr2L	8257044	8257544	501	*	1	0	0	0	0	0
chr2L	8266623	8267123	501	*	1	0	0	0	0	0
chr2L	8276157	8276657	501	*	1	0	0	0	0	0
chr2L	8277653	8278594	942	*	0	0	0	1	1	0
chr2L	8280686	8281588	903	*	0	0	1	1	0	0
chr2L	8282122	8282622	501	*	1	0	0	0	0	0
chr2L	8289842	8290357	516	*	1	0	1	1	0	0
chr2L	8300188	8301289	1102	*	1	1	1	0	1	0
chr2L	8302703	8303339	637	*	1	1	1	1	1	1
chr2L	8304550	8305050	501	*	1	0	0	0	0	0
chr2L	8307907	8308433	527	*	1	1	1	1	1	1
chr2L	8310900	8311401	502	*	0	0	0	0	1	1
chr2L	8320045	8320622	578	*	0	0	1	1	1	1
chr2L	8326821	8327321	501	*	1	0	0	0	0	0
chr2L	8334654	8335154	501	*	0	0	0	1	0	0
chr2L	8359088	8359588	501	*	1	0	0	0	0	0
chr2L	8361131	8361631	501	*	1	0	0	0	0	0
chr2L	8362037	8362714	678	*	0	0	1	1	0	0
chr2L	8365532	8366286	755	*	1	1	1	1	1	1
chr2L	8370302	8370802	501	*	0	0	0	1	0	0
chr2L	8376745	8377262	518	*	1	0	1	1	1	1
chr2L	8381476	8381981	506	*	0	0	1	1	0	0
chr2L	8382539	8383077	539	*	1	0	1	1	0	0
chr2L	8384677	8385177	501	*	1	0	0	0	0	0
chr2L	8387025	8387525	501	*	1	0	0	0	0	0
chr2L	8400161	8400698	538	*	0	1	1	1	1	1
chr2L	8403238	8403799	562	*	1	1	1	1	1	1
chr2L	8414983	8415879	897	*	0	1	1	1	1	1
chr2L	8416267	8416767	501	*	1	0	0	0	0	0
chr2L	8419190	8419743	554	*	0	0	0	1	1	1
chr2L	8421263	8421763	501	*	1	0	0	0	0	0
chr2L	8422568	8423068	501	*	0	0	1	0	0	0
chr2L	8423832	8424467	636	*	0	0	0	1	0	1
chr2L	8433245	8433745	501	*	0	0	0	1	0	0
chr2L	8437121	8437736	616	*	1	0	0	0	1	1
chr2L	8449299	8449823	525	*	1	0	1	1	1	0
chr2L	8464185	8464744	560	*	1	1	1	1	1	1
chr2L	8477899	8478557	659	*	1	1	0	1	1	1
chr2L	8482005	8482507	503	*	0	0	1	1	0	0
chr2L	8485483	8486011	529	*	0	1	1	1	0	0
chr2L	8488731	8489239	509	*	1	1	1	1	1	1
chr2L	8511610	8512170	561	*	1	1	1	1	1	1
chr2L	8514626	8515156	531	*	1	0	1	1	0	0
chr2L	8517110	8517722	613	*	1	0	1	1	1	1
chr2L	8521694	8522500	807	*	1	0	1	1	1	0
chr2L	8528233	8528762	530	*	1	1	1	1	1	1
chr2L	8541424	8541924	501	*	0	0	0	1	0	0
chr2L	8542442	8542942	501	*	0	1	0	0	0	0
chr2L	8545086	8546022	937	*	1	0	0	0	1	1
chr2L	8551099	8551599	501	*	1	0	0	0	0	0
chr2L	8553636	8554284	649	*	0	0	1	1	0	0
chr2L	8570570	8571084	515	*	0	0	1	1	0	0
chr2L	8574801	8575302	502	*	0	0	1	1	0	0
chr2L	8578442	8578942	501	*	1	0	0	0	0	0
chr2L	8580106	8580606	501	*	0	0	0	1	0	0
chr2L	8581617	8582117	501	*	0	0	0	0	0	1
chr2L	8675462	8676000	539	*	1	0	1	0	0	0
chr2L	8677097	8677597	501	*	1	0	0	0	0	0
chr2L	8683150	8683739	590	*	0	0	1	1	0	0
chr2L	8685621	8686503	883	*	1	0	1	1	1	1
chr2L	8692390	8693236	847	*	0	0	1	1	0	0
chr2L	8709453	8709961	509	*	1	0	0	1	0	1
chr2L	8715377	8716019	643	*	0	0	1	1	0	1
chr2L	8717553	8718427	875	*	1	0	1	1	0	1
chr2L	8719560	8720060	501	*	0	0	0	0	0	1
chr2L	8735135	8735959	825	*	0	0	1	1	1	1
chr2L	8739921	8741317	1397	*	1	1	1	1	1	1
chr2L	8809739	8810239	501	*	1	0	0	0	0	0
chr2L	8825125	8825696	572	*	1	0	1	1	1	1
chr2L	8841747	8842247	501	*	1	0	0	0	0	0
chr2L	8846546	8847046	501	*	0	0	0	0	1	0
chr2L	8847253	8847753	501	*	0	0	1	0	0	0
chr2L	8850598	8851098	501	*	1	0	0	0	0	0
chr2L	8852174	8852704	531	*	0	0	1	0	0	1
chr2L	8875742	8876242	501	*	1	0	0	0	0	0
chr2L	8888607	8889236	630	*	1	1	0	0	0	0
chr2L	8936462	8936962	501	*	1	0	0	0	0	0
chr2L	8942964	8943527	564	*	1	1	1	1	1	0
chr2L	8949817	8950347	531	*	1	0	1	1	0	0
chr2L	8952584	8953189	606	*	1	1	0	1	0	0
chr2L	8957611	8958651	1041	*	1	1	1	1	1	1
chr2L	8975500	8976000	501	*	1	0	0	0	0	0
chr2L	8984651	8985151	501	*	1	0	0	0	0	0
chr2L	8997219	8997818	600	*	1	1	1	1	1	1
chr2L	9013003	9013503	501	*	1	0	0	0	0	0
chr2L	9019347	9019847	501	*	0	0	0	0	1	0
chr2L	9026724	9027224	501	*	1	0	0	0	0	0
chr2L	9067060	9067560	501	*	0	1	0	0	0	0
chr2L	9123789	9124289	501	*	0	0	0	1	0	0
chr2L	9125553	9126192	640	*	1	0	1	1	1	0
chr2L	9126958	9127458	501	*	0	0	0	1	0	0
chr2L	9128567	9129067	501	*	1	0	0	0	0	0
chr2L	9132940	9133440	501	*	0	0	0	0	1	0
chr2L	9134704	9135204	501	*	0	0	1	0	0	0
chr2L	9137988	9138488	501	*	1	0	0	0	0	0
chr2L	9145593	9146211	619	*	1	0	1	0	0	0
chr2L	9150795	9151295	501	*	1	0	0	0	0	0
chr2L	9158241	9158753	513	*	1	1	1	1	0	0
chr2L	9166338	9167167	830	*	1	1	1	1	1	1
chr2L	9175114	9175647	534	*	0	0	1	1	0	1
chr2L	9176135	9176885	751	*	0	0	1	1	1	1
chr2L	9178561	9179652	1092	*	1	0	1	1	0	0
chr2L	9185202	9185702	501	*	0	0	0	0	1	0
chr2L	9186543	9187043	501	*	1	0	0	0	0	0
chr2L	9189216	9190719	1504	*	1	0	1	1	1	1
chr2L	9198355	9198924	570	*	0	0	0	1	0	1
chr2L	9203377	9203877	501	*	0	0	0	1	0	0
chr2L	9204127	9204627	501	*	0	0	1	0	0	0
chr2L	9205087	9205627	541	*	1	0	0	1	0	1
chr2L	9226250	9226750	501	*	1	0	0	0	0	0
chr2L	9236357	9236857	501	*	0	0	0	1	0	0
chr2L	9244414	9244914	501	*	0	0	0	1	0	0
chr2L	9271158	9271668	511	*	0	0	1	1	0	0
chr2L	9291678	9292209	532	*	1	0	1	1	0	0
chr2L	9320329	9320850	522	*	0	1	1	1	0	0
chr2L	9330476	9331040	565	*	1	1	1	1	1	1
chr2L	9377027	9377535	509	*	0	0	1	1	0	0
chr2L	9388021	9388521	501	*	1	0	0	0	0	0
chr2L	9389038	9389538	501	*	0	0	1	0	0	0
chr2L	9422636	9423136	501	*	1	0	0	0	0	0
chr2L	9431350	9431850	501	*	1	0	0	0	0	0
chr2L	9437088	9437588	501	*	1	0	0	0	0	0
chr2L	9449168	9449683	516	*	1	0	0	0	1	0
chr2L	9454353	9454913	561	*	1	0	1	0	0	0
chr2L	9459993	9460493	501	*	1	0	0	0	0	0
chr2L	9464494	9464994	501	*	0	1	0	0	0	0
chr2L	9494167	9495091	925	*	0	1	1	1	0	0
chr2L	9501319	9501819	501	*	0	0	0	1	0	0
chr2L	9512407	9512907	501	*	0	1	0	0	0	0
chr2L	9520682	9521635	954	*	1	1	1	0	0	0
chr2L	9522168	9522668	501	*	0	0	0	0	1	0
chr2L	9525640	9526220	581	*	0	0	1	1	0	1
chr2L	9539924	9540424	501	*	0	1	0	0	0	0
chr2L	9551051	9551551	501	*	0	0	0	1	0	0
chr2L	9557568	9558068	501	*	0	0	0	0	0	1
chr2L	9558856	9559356	501	*	0	0	0	1	0	0
chr2L	9565044	9565595	552	*	0	0	0	1	0	1
chr2L	9567211	9567786	576	*	0	1	0	0	0	1
chr2L	9567794	9568294	501	*	1	0	0	0	0	0
chr2L	9568346	9569429	1084	*	0	0	1	1	1	0
chr2L	9576487	9577039	553	*	0	1	1	1	0	0
chr2L	9583261	9583761	501	*	1	0	0	0	0	0
chr2L	9586222	9586722	501	*	0	0	0	1	0	0
chr2L	9602009	9602509	501	*	1	0	0	0	0	0
chr2L	9612669	9613604	936	*	1	1	1	1	0	0
chr2L	9616573	9617142	570	*	1	1	1	1	1	0
chr2L	9657415	9657915	501	*	1	0	0	0	0	0
chr2L	9666671	9667171	501	*	0	0	0	1	0	0
chr2L	9675280	9675846	567	*	0	0	0	1	0	1
chr2L	9677040	9677569	530	*	0	0	0	1	0	1
chr2L	9680928	9681428	501	*	0	0	0	1	0	0
chr2L	9699041	9699890	850	*	1	1	1	1	1	1
chr2L	9705731	9706231	501	*	1	0	0	0	0	0
chr2L	9706921	9707422	502	*	0	0	1	1	0	0
chr2L	9710966	9711473	508	*	1	1	1	1	0	0
chr2L	9715272	9715772	501	*	1	0	0	0	0	0
chr2L	9731154	9731738	585	*	1	1	1	1	0	0
chr2L	9757812	9758706	895	*	1	1	1	1	1	0
chr2L	9762989	9763752	764	*	1	1	1	1	1	1
chr2L	9776712	9777580	869	*	1	0	1	0	0	0
chr2L	9782125	9782625	501	*	0	0	0	1	0	0
chr2L	9790451	9791193	743	*	1	0	1	1	0	0
chr2L	9792779	9793345	567	*	0	1	1	1	1	1
chr2L	9887771	9888304	534	*	1	1	1	1	0	1
chr2L	9890515	9891084	570	*	1	1	1	1	1	1
chr2L	9894779	9895325	547	*	1	1	1	1	1	1
chr2L	9897204	9897765	562	*	1	1	1	1	1	1
chr2L	9907366	9907868	503	*	0	0	1	1	0	0
chr2L	9912391	9913101	711	*	1	1	1	1	1	1
chr2L	9914937	9915461	525	*	1	0	0	1	0	0
chr2L	9917930	9918450	521	*	1	1	1	1	0	0
chr2L	9921365	9921881	517	*	0	0	0	1	1	1
chr2L	9938533	9939076	544	*	1	0	0	0	1	1
chr2L	9953921	9954440	520	*	1	0	1	1	1	1
chr2L	9957066	9957575	510	*	1	0	1	1	1	0
chr2L	9966962	9967527	566	*	1	1	1	1	0	1
chr2L	9971353	9971853	501	*	1	0	0	0	0	0
chr2L	9983994	9984494	501	*	1	0	0	0	0	0
chr2L	9988421	9989630	1210	*	1	0	1	0	1	0
chr2L	9996746	9997278	533	*	1	1	0	0	0	0
chr2L	10002288	10004121	1834	*	1	1	1	1	1	1
chr2L	10009139	10010029	891	*	1	1	1	1	1	1
chr2L	10032935	10033852	918	*	1	1	0	0	0	0
chr2L	10053565	10054065	501	*	0	1	0	0	0	0
chr2L	10056617	10057266	650	*	1	1	1	1	1	1
chr2L	10058689	10059189	501	*	1	0	0	0	0	0
chr2L	10108703	10109203	501	*	0	1	0	0	0	0
chr2L	10111919	10112419	501	*	0	1	0	0	0	0
chr2L	10121656	10122156	501	*	0	1	0	0	0	0
chr2L	10180063	10180563	501	*	1	0	0	0	0	0
chr2L	10198744	10199244	501	*	0	0	0	0	0	1
chr2L	10200764	10201337	574	*	1	1	1	1	1	1
chr2L	10203925	10204533	609	*	1	1	1	1	1	1
chr2L	10220674	10221625	952	*	1	1	1	1	1	1
chr2L	10226857	10227357	501	*	0	0	1	0	0	0
chr2L	10229655	10230661	1007	*	0	1	0	0	1	1
chr2L	10237133	10237859	727	*	0	0	0	0	1	1
chr2L	10238771	10239801	1031	*	1	1	1	1	0	1
chr2L	10246772	10247290	519	*	1	1	0	1	0	0
chr2L	10247778	10248278	501	*	0	0	0	0	0	1
chr2L	10248721	10249221	501	*	0	0	0	0	1	0
chr2L	10249678	10250361	684	*	1	0	1	0	0	0
chr2L	10250459	10251011	553	*	0	1	0	1	0	0
chr2L	10255531	10256141	611	*	1	1	1	1	1	0
chr2L	10260732	10261284	553	*	0	1	1	1	0	0
chr2L	10262838	10263887	1050	*	1	1	1	1	1	1
chr2L	10269769	10270336	568	*	1	0	1	0	1	0
chr2L	10276647	10277271	625	*	0	0	0	0	1	1
chr2L	10277762	10279067	1306	*	1	1	1	1	0	0
chr2L	10291270	10291770	501	*	1	0	0	0	0	0
chr2L	10292465	10292965	501	*	0	0	1	0	0	0
chr2L	10294688	10295188	501	*	0	0	0	0	0	1
chr2L	10295214	10295714	501	*	1	0	0	0	0	0
chr2L	10296044	10296544	501	*	0	0	0	0	1	0
chr2L	10298270	10298778	509	*	0	1	1	1	0	0
chr2L	10303666	10304176	511	*	0	0	1	1	1	1
chr2L	10306649	10307182	534	*	1	1	1	1	1	0
chr2L	10311726	10312401	676	*	1	1	1	1	1	1
chr2L	10314146	10314827	682	*	1	1	1	1	1	0
chr2L	10321174	10321949	776	*	0	0	1	1	0	1
chr2L	10327673	10328194	522	*	1	1	1	1	0	0
chr2L	10333385	10334084	700	*	1	1	1	1	0	0
chr2L	10334726	10335558	833	*	1	0	0	1	1	0
chr2L	10339193	10340996	1804	*	1	1	1	1	0	1
chr2L	10342044	10342976	933	*	0	1	0	0	1	0
chr2L	10356536	10357094	559	*	1	1	1	1	1	1
chr2L	10362756	10363288	533	*	1	1	1	1	1	0
chr2L	10364552	10365052	501	*	1	0	0	0	0	0
chr2L	10366450	10366983	534	*	1	1	1	1	1	0
chr2L	10376086	10377265	1180	*	1	0	1	1	1	0
chr2L	10379799	10380370	572	*	1	1	1	1	1	0
chr2L	10385961	10386494	534	*	0	1	0	1	0	0
chr2L	10387509	10388360	852	*	1	1	1	1	1	1
chr2L	10396084	10396915	832	*	1	1	1	1	1	1
chr2L	10403638	10404146	509	*	0	0	1	0	0	1
chr2L	10408072	10408604	533	*	0	1	1	0	1	1
chr2L	10413608	10414286	679	*	1	1	1	1	1	1
chr2L	10418924	10419454	531	*	1	1	1	1	0	0
chr2L	10422525	10423449	925	*	1	1	1	1	0	0
chr2L	10426345	10427174	830	*	1	1	1	1	1	1
chr2L	10430658	10431439	782	*	1	0	0	1	1	0
chr2L	10435730	10436359	630	*	1	0	0	1	0	0
chr2L	10437251	10437768	518	*	0	1	0	1	0	1
chr2L	10438299	10439630	1332	*	1	1	1	1	1	0
chr2L	10443498	10443998	501	*	1	0	0	0	0	0
chr2L	10457358	10458021	664	*	1	0	1	0	1	0
chr2L	10458937	10459447	511	*	1	1	0	0	0	0
chr2L	10466662	10467623	962	*	0	0	0	1	0	1
chr2L	10472342	10472842	501	*	0	0	0	0	0	1
chr2L	10474055	10474555	501	*	0	0	0	1	0	0
chr2L	10476833	10477398	566	*	1	1	1	1	0	0
chr2L	10483103	10483603	501	*	1	0	0	0	0	0
chr2L	10488374	10488997	624	*	1	1	1	1	1	1
chr2L	10495461	10495961	501	*	0	0	0	0	0	1
chr2L	10498967	10499631	665	*	0	0	0	1	0	1
chr2L	10501938	10502479	542	*	0	0	0	0	1	1
chr2L	10503305	10503805	501	*	0	0	0	1	0	0
chr2L	10506551	10507147	597	*	1	1	1	1	1	0
chr2L	10517011	10517576	566	*	1	1	1	1	1	1
chr2L	10527451	10527951	501	*	0	0	1	0	0	0
chr2L	10544587	10545163	577	*	0	0	1	0	1	1
chr2L	10548704	10549204	501	*	1	0	0	0	0	0
chr2L	10553595	10554207	613	*	1	0	1	1	0	0
chr2L	10554454	10555109	656	*	0	0	1	0	1	1
chr2L	10586796	10587296	501	*	0	0	0	0	0	1
chr2L	10590138	10590638	501	*	0	0	0	1	0	0
chr2L	10590733	10591233	501	*	0	0	0	0	0	1
chr2L	10603548	10604048	501	*	0	1	0	0	0	0
chr2L	10604292	10604792	501	*	1	0	0	0	0	0
chr2L	10608147	10609171	1025	*	0	0	1	1	1	1
chr2L	10611006	10611506	501	*	1	0	0	0	0	0
chr2L	10614979	10615605	627	*	0	1	1	1	1	1
chr2L	10620842	10621348	507	*	0	0	1	1	0	0
chr2L	10625885	10626385	501	*	0	1	0	0	0	0
chr2L	10647656	10648156	501	*	1	0	0	0	0	0
chr2L	10732176	10732689	514	*	1	1	1	1	1	0
chr2L	10735775	10736316	542	*	1	0	1	1	0	0
chr2L	10743652	10744173	522	*	1	1	1	1	1	1
chr2L	10747186	10747686	501	*	0	0	1	0	0	0
chr2L	10751849	10752384	536	*	1	0	1	1	1	1
chr2L	10755945	10756445	501	*	0	0	0	0	0	1
chr2L	10767706	10768206	501	*	0	0	0	1	0	0
chr2L	10769737	10770237	501	*	0	0	0	1	0	0
chr2L	10842269	10842851	583	*	1	1	1	1	1	1
chr2L	10850554	10851111	558	*	1	1	1	1	1	1
chr2L	10857802	10858664	863	*	1	1	1	1	1	0
chr2L	10940150	10940650	501	*	0	1	0	0	0	0
chr2L	10947758	10948258	501	*	0	0	0	0	1	0
chr2L	10964416	10964936	521	*	1	1	1	1	0	0
chr2L	10967383	10967883	501	*	0	0	0	1	0	0
chr2L	10970151	10970724	574	*	1	1	1	1	1	1
chr2L	10976351	10976900	550	*	0	0	1	1	0	0
chr2L	10985961	10986974	1014	*	0	1	1	1	1	1
chr2L	10987666	10988166	501	*	0	0	0	0	1	0
chr2L	10989120	10989649	530	*	1	1	1	1	1	1
chr2L	11001024	11001534	511	*	0	0	1	1	0	0
chr2L	11003759	11004414	656	*	1	1	1	1	0	1
chr2L	11010851	11011530	680	*	1	1	1	1	0	0
chr2L	11044965	11045485	521	*	0	0	1	1	0	0
chr2L	11057495	11057995	501	*	0	0	0	0	0	1
chr2L	11060762	11061262	501	*	0	0	0	1	0	0
chr2L	11066772	11067272	501	*	0	0	0	1	0	0
chr2L	11070819	11071319	501	*	1	0	0	0	0	0
chr2L	11091176	11091705	530	*	0	1	1	1	0	0
chr2L	11100607	11101138	532	*	1	0	0	1	0	0
chr2L	11106453	11107078	626	*	1	1	1	1	1	1
chr2L	11120049	11120562	514	*	1	0	0	1	0	0
chr2L	11123293	11124060	768	*	1	1	1	1	1	1
chr2L	11130351	11130851	501	*	0	0	0	1	0	0
chr2L	11167843	11168610	768	*	0	0	1	1	1	1
chr2L	11171915	11172415	501	*	0	1	0	0	0	0
chr2L	11178728	11179281	554	*	1	1	1	1	0	0
chr2L	11188564	11189064	501	*	0	0	1	0	0	0
chr2L	11200021	11200521	501	*	0	0	0	0	0	1
chr2L	11206699	11207265	567	*	1	0	0	0	1	0
chr2L	11221196	11221751	556	*	0	0	1	1	1	1
chr2L	11224361	11224861	501	*	1	0	0	0	0	0
chr2L	11226684	11227368	685	*	0	0	1	1	0	0
chr2L	11232348	11232848	501	*	0	0	0	0	0	1
chr2L	11268722	11269331	610	*	1	1	1	1	1	1
chr2L	11272308	11272853	546	*	0	0	1	1	0	0
chr2L	11277788	11278299	512	*	0	0	1	1	0	0
chr2L	11279977	11280530	554	*	1	1	1	1	1	1
chr2L	11286633	11287133	501	*	1	0	0	0	0	0
chr2L	11296451	11296951	501	*	0	0	0	0	1	0
chr2L	11318424	11318924	501	*	0	1	0	0	0	0
chr2L	11322412	11322912	501	*	0	0	0	0	0	1
chr2L	11327454	11327954	501	*	0	0	0	0	1	0
chr2L	11341245	11342194	950	*	0	0	1	1	0	0
chr2L	11343733	11344233	501	*	1	0	0	0	0	0
chr2L	11344729	11345315	587	*	0	0	0	1	0	1
chr2L	11347064	11347927	864	*	0	0	1	1	1	0
chr2L	11354700	11355272	573	*	1	0	0	1	0	0
chr2L	11355287	11355787	501	*	0	0	0	0	1	0
chr2L	11358398	11359182	785	*	0	1	0	1	0	0
chr2L	11364417	11364917	501	*	0	0	0	0	0	1
chr2L	11376580	11377155	576	*	0	0	0	1	0	1
chr2L	11403230	11403730	501	*	0	0	0	0	0	1
chr2L	11415214	11415832	619	*	0	0	1	1	1	1
chr2L	11445662	11446162	501	*	0	0	0	1	0	0
chr2L	11447298	11448180	883	*	1	0	1	1	0	0
chr2L	11452739	11453265	527	*	1	0	0	0	1	1
chr2L	11453405	11453905	501	*	0	0	0	1	0	0
chr2L	11455590	11456090	501	*	1	0	0	0	0	0
chr2L	11458101	11458979	879	*	0	0	1	1	1	0
chr2L	11460439	11460995	557	*	0	0	0	1	1	1
chr2L	11474893	11475415	523	*	0	1	1	1	0	0
chr2L	11475421	11475921	501	*	1	0	0	0	0	0
chr2L	11485903	11486403	501	*	1	0	0	0	0	0
chr2L	11491099	11491599	501	*	1	0	0	0	0	0
chr2L	11493885	11494385	501	*	0	1	0	0	0	0
chr2L	11516851	11517520	670	*	1	1	1	1	1	1
chr2L	11581748	11582248	501	*	0	0	0	1	0	0
chr2L	11606996	11607496	501	*	0	0	0	1	0	0
chr2L	11624134	11624634	501	*	0	1	0	0	0	0
chr2L	11793863	11794363	501	*	1	0	0	0	0	0
chr2L	11806388	11807875	1488	*	0	0	1	1	1	1
chr2L	11808154	11808654	501	*	1	0	0	0	0	0
chr2L	11813482	11814006	525	*	0	0	1	1	0	0
chr2L	11816306	11816887	582	*	1	1	1	1	0	0
chr2L	11826395	11826895	501	*	0	0	0	0	0	1
chr2L	11829132	11829680	549	*	1	1	1	1	1	1
chr2L	11878777	11879277	501	*	0	1	0	0	0	0
chr2L	11904171	11904671	501	*	0	1	0	0	0	0
chr2L	11931223	11931723	501	*	0	0	0	1	0	0
chr2L	11940574	11941074	501	*	0	1	0	0	0	0
chr2L	11948485	11949253	769	*	1	1	0	0	0	0
chr2L	11955788	11956288	501	*	1	0	0	0	0	0
chr2L	11960874	11961374	501	*	1	0	0	0	0	0
chr2L	11965340	11965840	501	*	1	0	0	0	0	0
chr2L	11968810	11969310	501	*	1	0	0	0	0	0
chr2L	11973112	11973612	501	*	1	0	0	0	0	0
chr2L	11987773	11988560	788	*	1	1	1	1	1	1
chr2L	11990651	11991151	501	*	0	0	0	0	0	1
chr2L	11992730	11993232	503	*	0	0	0	0	1	1
chr2L	12003657	12004467	811	*	0	1	1	0	1	1
chr2L	12006928	12007749	822	*	1	0	1	1	1	1
chr2L	12010337	12011228	892	*	1	0	1	1	0	0
chr2L	12011657	12012223	567	*	0	0	0	0	1	1
chr2L	12020686	12021211	526	*	0	0	1	0	1	1
chr2L	12027186	12027686	501	*	0	0	0	1	0	0
chr2L	12030067	12030567	501	*	0	0	0	0	1	0
chr2L	12038204	12038729	526	*	1	0	1	1	0	0
chr2L	12040419	12040919	501	*	1	0	0	0	0	0
chr2L	12044623	12045158	536	*	0	0	1	1	0	0
chr2L	12045251	12045751	501	*	0	0	0	0	0	1
chr2L	12048643	12049167	525	*	1	0	0	0	1	1
chr2L	12055848	12056603	756	*	1	1	1	1	0	1
chr2L	12062908	12063419	512	*	1	0	1	1	1	1
chr2L	12065865	12066365	501	*	1	0	0	0	0	0
chr2L	12078118	12078618	501	*	0	1	0	0	0	0
chr2L	12079890	12080390	501	*	1	0	0	0	0	0
chr2L	12085744	12086244	501	*	0	1	0	0	0	0
chr2L	12087402	12087902	501	*	1	0	0	0	0	0
chr2L	12092623	12093123	501	*	1	0	0	0	0	0
chr2L	12093516	12094016	501	*	0	0	0	1	0	0
chr2L	12096228	12096774	547	*	1	0	1	1	1	1
chr2L	12103377	12104004	628	*	1	0	0	1	0	0
chr2L	12108843	12109346	504	*	0	0	1	1	0	0
chr2L	12133278	12134023	746	*	1	1	0	0	0	0
chr2L	12159606	12160106	501	*	1	0	0	0	0	0
chr2L	12172699	12173256	558	*	1	1	1	1	1	1
chr2L	12174768	12175268	501	*	1	0	0	0	0	0
chr2L	12242655	12243155	501	*	1	0	0	0	0	0
chr2L	12244297	12244805	509	*	0	0	1	1	0	0
chr2L	12252158	12252730	573	*	1	0	0	1	0	0
chr2L	12290193	12290693	501	*	1	0	0	0	0	0
chr2L	12292838	12293338	501	*	1	0	0	0	0	0
chr2L	12332446	12332946	501	*	0	1	0	0	0	0
chr2L	12341604	12342104	501	*	0	0	0	1	0	0
chr2L	12342993	12343910	918	*	1	0	0	1	0	0
chr2L	12365903	12366561	659	*	1	0	1	1	1	0
chr2L	12373412	12373912	501	*	0	1	0	0	0	0
chr2L	12422295	12422795	501	*	1	0	0	0	0	0
chr2L	12423899	12424948	1050	*	0	1	1	1	1	1
chr2L	12427437	12427957	521	*	1	0	1	1	0	0
chr2L	12433961	12434586	626	*	0	1	1	1	0	0
chr2L	12435289	12435789	501	*	1	0	0	0	0	0
chr2L	12454939	12455439	501	*	0	1	0	0	0	0
chr2L	12456968	12457605	638	*	1	0	0	0	1	1
chr2L	12459594	12460094	501	*	0	0	0	1	0	0
chr2L	12461037	12461759	723	*	1	0	1	0	1	1
chr2L	12466589	12467089	501	*	1	0	0	0	0	0
chr2L	12473481	12473981	501	*	1	0	0	0	0	0
chr2L	12474165	12474665	501	*	0	0	1	0	0	0
chr2L	12476478	12476982	505	*	0	0	1	1	0	0
chr2L	12478428	12478928	501	*	1	0	0	0	0	0
chr2L	12483323	12483823	501	*	1	0	0	0	0	0
chr2L	12483871	12484371	501	*	0	0	0	0	1	0
chr2L	12485031	12485531	501	*	0	0	0	0	0	1
chr2L	12487137	12487639	503	*	0	0	1	1	0	0
chr2L	12489074	12489574	501	*	1	0	0	0	0	0
chr2L	12493399	12493899	501	*	0	0	0	1	0	0
chr2L	12504966	12505483	518	*	0	0	1	1	0	1
chr2L	12513875	12514375	501	*	0	0	0	1	0	0
chr2L	12520108	12520717	610	*	1	1	1	1	1	1
chr2L	12529508	12530106	599	*	1	0	1	0	0	0
chr2L	12534029	12534529	501	*	0	0	0	1	0	0
chr2L	12535548	12536050	503	*	0	0	1	1	0	0
chr2L	12540137	12540752	616	*	1	1	0	0	0	0
chr2L	12546326	12546988	663	*	1	1	1	1	1	0
chr2L	12557788	12558288	501	*	1	0	0	0	0	0
chr2L	12576118	12576618	501	*	1	0	0	0	0	0
chr2L	12578964	12579464	501	*	0	1	0	0	0	0
chr2L	12586803	12587337	535	*	0	0	1	1	1	1
chr2L	12603300	12603800	501	*	0	1	0	0	0	0
chr2L	12607319	12607819	501	*	1	0	0	0	0	0
chr2L	12615345	12615845	501	*	1	0	0	0	0	0
chr2L	12617752	12618873	1122	*	1	0	1	1	0	1
chr2L	12622899	12623399	501	*	0	0	1	0	0	0
chr2L	12655738	12656287	550	*	0	0	1	1	1	0
chr2L	12665958	12666458	501	*	1	0	0	0	0	0
chr2L	12672699	12673199	501	*	1	0	0	0	0	0
chr2L	12677264	12677764	501	*	0	0	0	0	0	1
chr2L	12678221	12678721	501	*	0	0	0	1	0	0
chr2L	12679161	12679661	501	*	1	0	0	0	0	0
chr2L	12692683	12693235	553	*	1	0	1	1	1	1
chr2L	12694754	12695268	515	*	1	0	0	1	1	1
chr2L	12704367	12704927	561	*	1	0	1	1	0	0
chr2L	12712187	12712691	505	*	0	0	1	1	0	0
chr2L	12721618	12722444	827	*	1	1	1	1	0	1
chr2L	12803411	12803911	501	*	0	1	0	0	0	0
chr2L	12813352	12813852	501	*	1	0	0	0	0	0
chr2L	12817352	12817852	501	*	1	0	0	0	0	0
chr2L	12822830	12823330	501	*	0	0	0	0	1	0
chr2L	12829739	12830239	501	*	0	0	0	1	0	0
chr2L	12846912	12847412	501	*	1	0	0	0	0	0
chr2L	12880405	12880905	501	*	0	1	0	0	0	0
chr2L	12973935	12974541	607	*	1	0	0	1	0	1
chr2L	12993778	12994278	501	*	0	1	0	0	0	0
chr2L	13000355	13000915	561	*	1	1	1	1	1	1
chr2L	13003553	13004331	779	*	1	1	1	1	0	0
chr2L	13018873	13019390	518	*	1	1	1	1	1	1
chr2L	13021067	13021597	531	*	0	1	1	1	0	0
chr2L	13042544	13043044	501	*	0	0	0	0	0	1
chr2L	13059678	13060178	501	*	0	0	0	1	0	0
chr2L	13078256	13078756	501	*	0	0	0	0	1	0
chr2L	13101306	13101831	526	*	0	0	0	0	1	1
chr2L	13150023	13150523	501	*	1	0	0	0	0	0
chr2L	13165280	13165964	685	*	1	1	1	1	1	1
chr2L	13176561	13177149	589	*	1	1	1	1	1	1
chr2L	13179000	13179509	510	*	1	0	0	1	1	1
chr2L	13182337	13182843	507	*	1	0	0	0	1	1
chr2L	13191316	13192421	1106	*	1	1	1	1	1	1
chr2L	13203499	13204031	533	*	1	1	1	1	0	0
chr2L	13204541	13205446	906	*	0	0	0	0	1	1
chr2L	13211597	13212229	633	*	1	0	1	1	0	0
chr2L	13215583	13216213	631	*	1	0	1	1	1	0
chr2L	13219664	13220230	567	*	1	1	1	1	1	1
chr2L	13222260	13222929	670	*	1	0	1	1	1	1
chr2L	13225374	13225874	501	*	1	0	0	0	0	0
chr2L	13227224	13227724	501	*	1	0	0	0	0	0
chr2L	13229242	13229742	501	*	1	0	0	0	0	0
chr2L	13234686	13235186	501	*	1	0	0	0	0	0
chr2L	13240126	13240626	501	*	1	0	0	0	0	0
chr2L	13244239	13244899	661	*	1	1	1	1	1	0
chr2L	13251265	13251765	501	*	1	0	0	0	0	0
chr2L	13254817	13255323	507	*	0	0	1	1	0	0
chr2L	13260319	13261241	923	*	0	0	0	1	0	1
chr2L	13267891	13268440	550	*	0	0	1	1	0	0
chr2L	13286547	13287057	511	*	1	0	1	1	1	1
chr2L	13289778	13290290	513	*	0	0	0	1	1	1
chr2L	13296039	13296581	543	*	1	1	1	1	1	1
chr2L	13325849	13326349	501	*	0	1	0	0	0	0
chr2L	13349124	13349624	501	*	0	0	0	1	0	0
chr2L	13365902	13366626	725	*	1	1	1	1	0	1
chr2L	13367066	13367887	822	*	1	0	1	1	1	1
chr2L	13368920	13369420	501	*	0	0	0	0	1	0
chr2L	13370738	13371253	516	*	0	0	0	1	1	1
chr2L	13373746	13374379	634	*	1	1	1	1	1	1
chr2L	13378613	13379138	526	*	1	1	1	1	1	0
chr2L	13387036	13387582	547	*	1	1	1	1	1	1
chr2L	13394805	13395360	556	*	1	1	1	1	1	0
chr2L	13398721	13399252	532	*	1	0	1	1	0	0
chr2L	13445326	13445979	654	*	0	1	1	1	1	1
chr2L	13458982	13459482	501	*	1	0	0	0	0	0
chr2L	13500368	13501244	877	*	0	1	0	1	0	0
chr2L	13501952	13502452	501	*	0	0	1	0	0	0
chr2L	13513549	13514049	501	*	0	0	0	1	0	0
chr2L	13514324	13514824	501	*	0	0	1	0	0	0
chr2L	13515008	13515821	814	*	1	0	0	0	0	1
chr2L	13540634	13541134	501	*	0	1	0	0	0	0
chr2L	13548760	13549260	501	*	1	0	0	0	0	0
chr2L	13549278	13550806	1529	*	0	1	1	1	1	1
chr2L	13554484	13554984	501	*	0	0	0	0	0	1
chr2L	13569953	13570453	501	*	1	0	0	0	0	0
chr2L	13573618	13574118	501	*	1	0	0	0	0	0
chr2L	13576319	13576831	513	*	0	0	1	1	0	0
chr2L	13585564	13586064	501	*	1	0	0	0	0	0
chr2L	13597172	13597672	501	*	1	0	0	0	0	0
chr2L	13622720	13623220	501	*	1	0	0	0	0	0
chr2L	13640360	13641060	701	*	1	0	0	1	1	1
chr2L	13641339	13642517	1179	*	1	1	1	1	0	1
chr2L	13680298	13680798	501	*	1	0	0	0	0	0
chr2L	13732185	13732759	575	*	0	1	0	1	0	0
chr2L	13763075	13763575	501	*	0	1	0	0	0	0
chr2L	13770859	13771392	534	*	1	1	1	1	1	0
chr2L	13780416	13780934	519	*	1	1	1	1	1	1
chr2L	13781959	13782508	550	*	0	0	1	0	1	1
chr2L	13783180	13783861	682	*	0	0	1	1	1	0
chr2L	13793280	13793811	532	*	0	0	1	1	1	0
chr2L	13811197	13811729	533	*	1	0	1	0	1	1
chr2L	13813572	13814079	508	*	0	1	1	1	0	0
chr2L	13829493	13830101	609	*	1	1	1	1	1	1
chr2L	13833110	13833617	508	*	1	0	0	1	0	0
chr2L	13834822	13835608	787	*	1	1	1	1	1	1
chr2L	13838402	13839092	691	*	0	0	1	1	1	1
chr2L	13842119	13842619	501	*	0	1	0	0	0	0
chr2L	13851015	13851515	501	*	1	0	0	0	0	0
chr2L	13863461	13863961	501	*	1	0	0	0	0	0
chr2L	13867710	13868210	501	*	1	0	0	0	0	0
chr2L	13869369	13869869	501	*	1	0	0	0	0	0
chr2L	13878715	13879215	501	*	0	0	0	1	0	0
chr2L	13887065	13887565	501	*	1	0	0	0	0	0
chr2L	13888780	13889280	501	*	0	0	0	0	1	0
chr2L	13892682	13893182	501	*	1	0	0	0	0	0
chr2L	13903898	13904912	1015	*	1	1	1	1	1	1
chr2L	14011552	14012052	501	*	1	0	0	0	0	0
chr2L	14023790	14024481	692	*	1	0	0	1	0	1
chr2L	14040483	14040983	501	*	1	0	0	0	0	0
chr2L	14087129	14087629	501	*	1	0	0	0	0	0
chr2L	14094624	14095135	512	*	1	1	1	1	1	1
chr2L	14097636	14098136	501	*	0	0	0	1	0	0
chr2L	14112127	14112627	501	*	0	1	0	0	0	0
chr2L	14119483	14119983	501	*	1	0	0	0	0	0
chr2L	14160830	14161330	501	*	0	1	0	0	0	0
chr2L	14210932	14211807	876	*	0	1	0	0	1	1
chr2L	14212011	14212511	501	*	0	0	0	1	0	0
chr2L	14228628	14229128	501	*	1	0	0	0	0	0
chr2L	14231039	14231539	501	*	0	0	0	0	1	0
chr2L	14233895	14235137	1243	*	0	0	1	1	0	1
chr2L	14237882	14238417	536	*	0	0	0	1	0	1
chr2L	14245053	14245708	656	*	0	0	1	1	1	1
chr2L	14246936	14247453	518	*	0	0	1	1	0	0
chr2L	14251684	14252378	695	*	0	1	1	1	0	0
chr2L	14261950	14262450	501	*	1	0	0	0	0	0
chr2L	14262819	14263340	522	*	0	0	1	1	0	0
chr2L	14264880	14265767	888	*	1	0	1	0	1	0
chr2L	14267143	14267741	599	*	0	0	0	1	0	1
chr2L	14274641	14275141	501	*	1	0	0	0	0	0
chr2L	14284931	14285431	501	*	1	0	0	0	0	0
chr2L	14287770	14288310	541	*	1	1	0	1	0	0
chr2L	14292706	14293423	718	*	0	0	0	1	0	1
chr2L	14298662	14299184	523	*	0	0	1	1	0	1
chr2L	14300770	14301270	501	*	0	0	0	1	0	0
chr2L	14303450	14303950	501	*	1	0	0	0	0	0
chr2L	14307147	14307647	501	*	0	0	0	0	0	1
chr2L	14312495	14312995	501	*	0	0	0	0	0	1
chr2L	14333983	14334483	501	*	0	0	0	1	0	0
chr2L	14337229	14337738	510	*	0	0	1	0	1	0
chr2L	14348511	14349030	520	*	1	1	1	1	1	1
chr2L	14354803	14355406	604	*	1	1	1	1	1	1
chr2L	14376410	14376910	501	*	0	0	0	1	0	0
chr2L	14377914	14378508	595	*	0	0	1	1	0	0
chr2L	14403260	14403760	501	*	0	0	0	1	0	0
chr2L	14410169	14410680	512	*	1	0	1	0	0	0
chr2L	14415876	14416376	501	*	1	0	0	0	0	0
chr2L	14419619	14420168	550	*	0	0	1	1	0	0
chr2L	14423199	14423799	601	*	1	0	1	0	0	0
chr2L	14428715	14429215	501	*	0	0	1	0	0	0
chr2L	14430392	14430892	501	*	1	0	0	0	0	0
chr2L	14432357	14432857	501	*	0	0	0	0	0	1
chr2L	14434415	14435326	912	*	1	0	1	0	1	1
chr2L	14439837	14440337	501	*	1	0	0	0	0	0
chr2L	14444723	14445327	605	*	0	0	1	1	0	1
chr2L	14446323	14446823	501	*	0	0	1	0	0	0
chr2L	14448689	14449760	1072	*	0	0	1	1	1	1
chr2L	14453140	14453727	588	*	0	0	1	1	1	1
chr2L	14455735	14456235	501	*	1	0	0	0	0	0
chr2L	14456297	14456844	548	*	0	0	1	1	0	0
chr2L	14458184	14458684	501	*	0	0	0	0	1	0
chr2L	14461017	14462083	1067	*	1	0	1	0	1	0
chr2L	14462692	14463449	758	*	0	0	1	0	0	1
chr2L	14464603	14465103	501	*	1	0	0	0	0	0
chr2L	14469925	14470425	501	*	1	0	0	0	0	0
chr2L	14472556	14473056	501	*	0	0	1	0	0	0
chr2L	14476535	14477035	501	*	0	0	0	1	0	0
chr2L	14482585	14483312	728	*	1	0	1	0	1	0
chr2L	14487049	14487549	501	*	1	0	0	0	0	0
chr2L	14490035	14491025	991	*	0	0	1	1	1	1
chr2L	14497337	14498385	1049	*	1	0	1	0	1	0
chr2L	14513050	14513571	522	*	0	0	0	1	1	0
chr2L	14513835	14514335	501	*	0	0	1	0	0	0
chr2L	14515207	14515707	501	*	0	0	0	1	0	0
chr2L	14517228	14517728	501	*	1	0	0	0	0	0
chr2L	14518418	14518918	501	*	0	0	0	1	0	0
chr2L	14521247	14521752	506	*	0	0	0	1	0	1
chr2L	14527475	14528069	595	*	0	0	0	1	1	1
chr2L	14537108	14538280	1173	*	0	0	1	1	1	1
chr2L	14540056	14540556	501	*	1	0	0	0	0	0
chr2L	14545310	14546192	883	*	1	0	0	0	1	1
chr2L	14547029	14547556	528	*	0	0	1	1	0	0
chr2L	14553985	14554833	849	*	1	0	1	0	0	0
chr2L	14560292	14561049	758	*	0	0	1	1	1	1
chr2L	14577149	14577710	562	*	1	0	1	0	0	1
chr2L	14579410	14580037	628	*	1	0	0	0	1	0
chr2L	14580756	14581639	884	*	0	1	0	1	0	0
chr2L	14583317	14583817	501	*	0	0	0	1	0	0
chr2L	14585027	14585527	501	*	1	0	0	0	0	0
chr2L	14588813	14589325	513	*	0	1	1	1	0	0
chr2L	14589600	14590100	501	*	1	0	0	0	0	0
chr2L	14598581	14599081	501	*	0	0	0	1	0	0
chr2L	14599147	14599647	501	*	0	0	1	0	0	0
chr2L	14619090	14619590	501	*	0	0	1	1	0	0
chr2L	14640319	14640819	501	*	1	0	0	0	0	0
chr2L	14652070	14652570	501	*	1	0	0	0	0	0
chr2L	14652752	14653252	501	*	0	0	0	1	0	0
chr2L	14656475	14656975	501	*	0	0	0	1	0	0
chr2L	14662787	14663292	506	*	1	0	0	1	0	0
chr2L	14673659	14674686	1028	*	0	0	1	1	0	1
chr2L	14676111	14676611	501	*	0	0	0	1	0	0
chr2L	14684783	14685558	776	*	1	0	1	1	0	0
chr2L	14685594	14686094	501	*	0	0	0	0	0	1
chr2L	14688920	14689545	626	*	1	1	0	0	0	1
chr2L	14690546	14691062	517	*	0	0	1	0	1	0
chr2L	14699497	14699997	501	*	0	0	0	1	0	0
chr2L	14701419	14701919	501	*	0	0	0	1	0	0
chr2L	14706119	14706668	550	*	1	1	1	1	1	1
chr2L	14721015	14721515	501	*	0	0	0	1	0	0
chr2L	14851623	14852178	556	*	1	1	0	0	0	0
chr2L	14898555	14899055	501	*	0	0	0	1	0	0
chr2L	14953156	14953656	501	*	0	0	0	1	0	0
chr2L	14972752	14973252	501	*	0	1	0	0	0	0
chr2L	14980372	14980969	598	*	0	0	0	1	0	1
chr2L	14995656	14996159	504	*	0	0	0	1	0	1
chr2L	15005469	15005992	524	*	1	1	1	1	1	1
chr2L	15007664	15008164	501	*	1	0	0	0	0	0
chr2L	15009703	15010239	537	*	1	0	0	1	0	0
chr2L	15013521	15014021	501	*	1	0	0	0	0	0
chr2L	15039228	15039905	678	*	1	1	1	1	1	1
chr2L	15057626	15058229	604	*	0	1	1	1	1	1
chr2L	15060446	15061153	708	*	1	1	1	1	1	1
chr2L	15065649	15066168	520	*	0	0	1	1	0	0
chr2L	15067545	15068366	822	*	1	1	1	1	1	1
chr2L	15096675	15097175	501	*	0	1	0	0	0	0
chr2L	15105786	15106289	504	*	0	0	0	0	1	1
chr2L	15108618	15109118	501	*	1	0	0	0	0	0
chr2L	15111294	15111794	501	*	1	0	0	0	0	0
chr2L	15113078	15113691	614	*	1	1	1	1	1	1
chr2L	15117937	15118437	501	*	0	1	0	0	0	0
chr2L	15256042	15256638	597	*	1	1	1	1	1	1
chr2L	15264328	15264865	538	*	0	0	1	1	1	1
chr2L	15271654	15272276	623	*	1	1	1	1	1	1
chr2L	15306779	15307581	803	*	1	1	1	1	0	0
chr2L	15315271	15315771	501	*	1	0	0	0	0	0
chr2L	15324090	15324935	846	*	1	0	1	0	0	0
chr2L	15326930	15327430	501	*	0	0	1	0	0	0
chr2L	15331613	15332183	571	*	1	0	0	0	1	0
chr2L	15333472	15333978	507	*	0	0	1	1	0	0
chr2L	15339428	15339928	501	*	0	0	0	1	0	0
chr2L	15341366	15341866	501	*	0	0	1	0	0	0
chr2L	15384498	15384998	501	*	0	0	0	0	1	0
chr2L	15422404	15422904	501	*	0	1	0	0	0	0
chr2L	15425750	15426250	501	*	0	0	0	1	0	0
chr2L	15430351	15430851	501	*	0	0	0	1	0	0
chr2L	15434840	15435340	501	*	0	1	0	0	0	0
chr2L	15438922	15439422	501	*	0	1	0	0	0	0
chr2L	15445241	15445741	501	*	0	0	0	1	0	0
chr2L	15453847	15454353	507	*	0	0	1	1	0	0
chr2L	15454993	15455497	505	*	1	0	0	0	1	0
chr2L	15457282	15457782	501	*	0	0	1	0	0	0
chr2L	15470834	15471334	501	*	1	0	0	0	0	0
chr2L	15472279	15472779	501	*	0	0	1	0	0	0
chr2L	15478600	15479101	502	*	0	0	1	1	0	0
chr2L	15479242	15479742	501	*	1	0	0	0	0	0
chr2L	15482027	15482527	501	*	1	0	0	0	0	0
chr2L	15486510	15487010	501	*	1	0	0	0	0	0
chr2L	15491973	15492563	591	*	1	0	1	0	0	0
chr2L	15498607	15499298	692	*	1	1	1	1	1	1
chr2L	15501066	15501566	501	*	0	0	0	0	1	0
chr2L	15504508	15505008	501	*	0	1	0	0	0	0
chr2L	15557271	15557771	501	*	0	0	0	1	0	0
chr2L	15643711	15644215	505	*	1	1	0	1	0	0
chr2L	15731699	15732199	501	*	1	0	0	0	0	0
chr2L	15735839	15736339	501	*	1	0	0	0	0	0
chr2L	15744191	15744691	501	*	1	0	0	0	0	0
chr2L	15745767	15746303	537	*	0	0	1	1	0	0
chr2L	15746342	15746842	501	*	0	1	0	0	0	0
chr2L	15747064	15747625	562	*	0	0	0	0	1	1
chr2L	15747955	15748455	501	*	0	1	0	0	0	0
chr2L	15750816	15751644	829	*	1	0	0	1	1	1
chr2L	15751990	15752490	501	*	0	0	1	0	0	0
chr2L	15762338	15762921	584	*	1	0	0	1	0	0
chr2L	15768052	15768552	501	*	1	0	0	0	0	0
chr2L	15770883	15771401	519	*	1	1	1	1	0	0
chr2L	15779819	15780326	508	*	1	0	1	0	0	0
chr2L	15782955	15783455	501	*	0	1	0	0	0	0
chr2L	15810513	15811013	501	*	1	0	0	0	0	0
chr2L	15857964	15858464	501	*	1	0	0	0	0	0
chr2L	15900550	15901101	552	*	0	0	0	1	1	1
chr2L	15902563	15903063	501	*	0	0	0	0	0	1
chr2L	15903676	15904176	501	*	0	1	0	0	0	0
chr2L	15908692	15909192	501	*	0	0	0	0	1	0
chr2L	15909486	15909986	501	*	0	0	0	0	0	1
chr2L	15909999	15910499	501	*	0	0	0	1	0	0
chr2L	15910680	15911623	944	*	1	0	1	0	0	0
chr2L	15949417	15949917	501	*	0	1	0	0	0	0
chr2L	15992526	15993026	501	*	1	0	0	0	0	0
chr2L	16026646	16027146	501	*	0	1	0	0	0	0
chr2L	16041789	16042740	952	*	1	1	0	0	0	0
chr2L	16049503	16050196	694	*	1	1	1	1	0	0
chr2L	16167354	16168273	920	*	0	0	1	1	1	1
chr2L	16177621	16178121	501	*	1	0	0	0	0	0
chr2L	16198092	16198599	508	*	0	0	1	1	0	0
chr2L	16213564	16214064	501	*	1	0	0	0	0	0
chr2L	16223651	16224416	766	*	1	1	0	0	0	0
chr2L	16231135	16231734	600	*	1	0	1	1	1	1
chr2L	16233964	16234464	501	*	0	0	0	1	0	0
chr2L	16234780	16235312	533	*	1	0	0	1	0	0
chr2L	16251444	16251981	538	*	1	0	1	0	0	0
chr2L	16252857	16253357	501	*	1	0	0	0	0	0
chr2L	16254422	16254954	533	*	0	0	1	1	0	0
chr2L	16257320	16257839	520	*	1	1	1	1	1	1
chr2L	16261954	16262467	514	*	0	0	0	0	1	1
chr2L	16268419	16268919	501	*	0	0	1	0	0	0
chr2L	16269183	16270175	993	*	1	0	0	1	0	0
chr2L	16270449	16270949	501	*	0	0	0	0	0	1
chr2L	16275847	16276347	501	*	0	1	0	0	0	0
chr2L	16276876	16277376	501	*	0	0	0	0	1	0
chr2L	16279830	16280383	554	*	1	0	1	1	1	0
chr2L	16281780	16282280	501	*	0	0	1	0	0	0
chr2L	16285672	16286172	501	*	1	0	0	0	0	0
chr2L	16287275	16288081	807	*	0	1	1	1	1	1
chr2L	16299289	16300144	856	*	1	1	1	1	1	1
chr2L	16302499	16303153	655	*	1	1	0	0	0	0
chr2L	16306933	16307548	616	*	1	1	1	1	1	1
chr2L	16310466	16310975	510	*	1	1	1	1	1	1
chr2L	16314972	16315472	501	*	1	0	0	0	0	0
chr2L	16319889	16320389	501	*	1	0	0	0	0	0
chr2L	16321211	16322018	808	*	0	0	1	1	0	0
chr2L	16323501	16324001	501	*	1	0	0	0	0	0
chr2L	16325618	16326243	626	*	1	1	1	1	1	1
chr2L	16326917	16327417	501	*	0	0	0	0	0	1
chr2L	16328887	16329407	521	*	1	1	0	1	1	1
chr2L	16333772	16334272	501	*	0	1	0	0	0	0
chr2L	16350015	16350515	501	*	0	1	0	0	0	0
chr2L	16351950	16352893	944	*	1	0	1	1	1	1
chr2L	16356475	16357132	658	*	1	1	1	1	1	1
chr2L	16364651	16365194	544	*	0	0	1	1	0	0
chr2L	16405742	16406242	501	*	1	0	0	0	0	0
chr2L	16414816	16415316	501	*	1	0	0	0	0	0
chr2L	16415498	16415998	501	*	0	1	0	0	0	0
chr2L	16422614	16423202	589	*	1	0	1	1	0	1
chr2L	16439119	16439619	501	*	1	0	0	0	0	0
chr2L	16447917	16448429	513	*	0	0	1	1	0	0
chr2L	16456419	16456919	501	*	0	0	0	0	1	0
chr2L	16463272	16463772	501	*	1	0	0	0	0	0
chr2L	16486104	16486742	639	*	1	0	1	1	1	1
chr2L	16487554	16488054	501	*	0	1	0	0	0	0
chr2L	16491101	16491770	670	*	1	1	1	1	1	1
chr2L	16499380	16499934	555	*	1	0	1	1	0	0
chr2L	16507596	16508108	513	*	0	1	1	1	0	1
chr2L	16521157	16521724	568	*	1	0	1	0	1	1
chr2L	16522996	16523496	501	*	1	0	0	0	0	0
chr2L	16525967	16526507	541	*	0	0	1	1	0	1
chr2L	16530861	16531361	501	*	0	0	0	1	0	0
chr2L	16532737	16533237	501	*	1	0	0	0	0	0
chr2L	16533376	16533876	501	*	0	0	1	0	0	0
chr2L	16534075	16535277	1203	*	0	0	0	1	1	1
chr2L	16538130	16538630	501	*	0	0	0	0	0	1
chr2L	16540735	16541235	501	*	0	0	0	0	0	1
chr2L	16543147	16543703	557	*	1	1	0	1	0	0
chr2L	16548093	16548600	508	*	0	0	0	0	1	1
chr2L	16582673	16583173	501	*	1	0	0	0	0	0
chr2L	16588033	16588548	516	*	1	0	1	0	0	0
chr2L	16588860	16589360	501	*	0	0	0	1	0	0
chr2L	16598664	16599164	501	*	0	1	0	0	0	0
chr2L	16601510	16602010	501	*	1	0	0	0	0	0
chr2L	16602197	16602699	503	*	0	0	0	0	1	1
chr2L	16625860	16626360	501	*	1	0	0	0	0	0
chr2L	16633394	16633894	501	*	1	0	0	0	0	0
chr2L	16647835	16648335	501	*	0	1	0	0	0	0
chr2L	16656496	16657154	659	*	1	1	1	1	0	0
chr2L	16676846	16677410	565	*	1	1	1	1	1	1
chr2L	16679790	16680309	520	*	1	1	1	1	1	1
chr2L	16684103	16684603	501	*	0	0	0	0	1	0
chr2L	16686198	16686698	501	*	1	0	0	0	0	0
chr2L	16689082	16690070	989	*	1	0	0	1	0	0
chr2L	16696366	16696866	501	*	1	0	0	0	0	0
chr2L	16702985	16703485	501	*	0	0	0	0	1	0
chr2L	16707529	16708029	501	*	0	0	0	1	0	0
chr2L	16716003	16716503	501	*	0	0	0	1	0	0
chr2L	16719491	16720394	904	*	1	1	1	1	1	1
chr2L	16727524	16728034	511	*	0	0	1	1	0	0
chr2L	16729540	16730056	517	*	0	0	1	1	1	1
chr2L	16731848	16732348	501	*	0	0	1	1	0	0
chr2L	16738115	16738644	530	*	0	1	1	1	1	1
chr2L	16742881	16743418	538	*	1	1	1	1	1	1
chr2L	16761009	16761616	608	*	0	0	1	1	0	1
chr2L	16763369	16763869	501	*	1	0	0	0	0	0
chr2L	16768134	16768634	501	*	0	0	0	1	0	0
chr2L	16772935	16773435	501	*	1	0	0	0	0	0
chr2L	16787497	16788015	519	*	1	0	1	1	0	0
chr2L	16798664	16799193	530	*	0	0	1	1	0	0
chr2L	16801629	16802184	556	*	1	1	1	1	0	0
chr2L	16815887	16817322	1436	*	0	1	1	0	1	1
chr2L	16817336	16817836	501	*	1	0	0	0	0	0
chr2L	16818086	16818586	501	*	0	0	0	1	0	0
chr2L	16824890	16825441	552	*	0	1	1	0	1	0
chr2L	16825878	16826378	501	*	1	0	0	0	0	0
chr2L	16826846	16827414	569	*	0	1	1	1	1	1
chr2L	16848493	16849243	751	*	1	1	1	1	0	0
chr2L	16858856	16859656	801	*	1	1	1	1	1	1
chr2L	16864308	16864808	501	*	0	0	0	1	0	0
chr2L	16868833	16869333	501	*	0	0	0	1	0	0
chr2L	16874676	16875491	816	*	0	0	1	1	0	1
chr2L	16876450	16876950	501	*	0	1	0	0	0	0
chr2L	16879158	16879753	596	*	1	1	1	1	1	1
chr2L	16882822	16883322	501	*	0	0	0	1	0	0
chr2L	16887986	16888747	762	*	1	1	1	1	1	1
chr2L	16901937	16902454	518	*	1	0	0	1	0	0
chr2L	16983186	16983698	513	*	0	0	1	1	1	0
chr2L	17092733	17093233	501	*	0	1	0	0	0	0
chr2L	17130760	17131260	501	*	0	1	0	0	0	0
chr2L	17163297	17163797	501	*	0	1	0	0	0	0
chr2L	17176738	17177238	501	*	0	1	0	0	0	0
chr2L	17195127	17195627	501	*	0	1	0	0	0	0
chr2L	17201708	17202208	501	*	0	1	0	0	0	0
chr2L	17217507	17218007	501	*	0	0	1	0	0	0
chr2L	17221697	17222197	501	*	1	0	0	0	0	0
chr2L	17227013	17227662	650	*	1	0	1	1	0	0
chr2L	17242275	17242775	501	*	0	0	0	1	0	0
chr2L	17244601	17245144	544	*	0	0	0	0	1	1
chr2L	17254852	17255442	591	*	0	0	0	1	1	0
chr2L	17258210	17258743	534	*	0	0	1	0	1	0
chr2L	17258792	17259292	501	*	0	0	0	1	0	0
chr2L	17260455	17261117	663	*	1	1	0	1	0	0
chr2L	17262026	17262526	501	*	0	0	1	0	0	0
chr2L	17262696	17263196	501	*	0	0	0	0	1	0
chr2L	17263281	17263781	501	*	1	0	0	0	0	0
chr2L	17264047	17264547	501	*	0	0	0	1	0	0
chr2L	17266647	17267147	501	*	1	0	0	0	0	0
chr2L	17368405	17368927	523	*	1	1	1	1	0	0
chr2L	17378562	17379074	513	*	1	0	0	0	1	0
chr2L	17382074	17383085	1012	*	1	0	1	1	0	0
chr2L	17384170	17384940	771	*	0	1	0	1	0	0
chr2L	17410252	17410901	650	*	1	1	1	1	1	1
chr2L	17428151	17428651	501	*	0	0	0	0	0	1
chr2L	17435952	17436452	501	*	1	0	0	0	0	0
chr2L	17449296	17449796	501	*	0	0	0	1	0	0
chr2L	17465842	17466342	501	*	0	1	0	0	0	0
chr2L	17466389	17467051	663	*	0	0	0	1	1	1
chr2L	17472733	17473502	770	*	1	1	1	1	0	1
chr2L	17477565	17478096	532	*	1	1	1	1	1	0
chr2L	17480966	17481498	533	*	1	0	0	1	1	1
chr2L	17484034	17484687	654	*	1	1	1	1	1	1
chr2L	17497115	17497615	501	*	1	0	0	0	0	0
chr2L	17500826	17501446	621	*	1	1	1	1	1	1
chr2L	17514180	17514680	501	*	1	0	0	0	0	0
chr2L	17515585	17516085	501	*	1	0	0	0	0	0
chr2L	17550584	17551084	501	*	0	1	0	0	0	0
chr2L	17589758	17590328	571	*	1	1	0	1	0	1
chr2L	17594044	17594544	501	*	0	0	0	1	0	0
chr2L	17603156	17603764	609	*	1	1	1	1	1	1
chr2L	17644423	17644923	501	*	1	0	0	0	0	0
chr2L	17650799	17651299	501	*	0	1	0	0	0	0
chr2L	17702369	17702869	501	*	0	0	0	1	0	0
chr2L	17715360	17716239	880	*	1	1	0	0	0	0
chr2L	17721902	17722402	501	*	1	0	0	0	0	0
chr2L	17734535	17735124	590	*	0	1	0	1	0	0
chr2L	17735586	17736167	582	*	1	0	1	0	1	0
chr2L	17740365	17740865	501	*	1	0	0	0	0	0
chr2L	17748725	17749225	501	*	1	0	0	0	0	0
chr2L	17752291	17752791	501	*	1	0	0	0	0	0
chr2L	17753843	17754764	922	*	0	0	1	0	1	0
chr2L	17755496	17755996	501	*	1	0	0	0	0	0
chr2L	17764196	17764696	501	*	0	0	0	0	0	1
chr2L	17765338	17765838	501	*	0	0	0	1	0	0
chr2L	17766515	17767015	501	*	0	0	0	0	1	0
chr2L	17777318	17777981	664	*	1	0	1	1	1	1
chr2L	17784638	17785138	501	*	0	1	0	0	0	0
chr2L	17830998	17831498	501	*	1	0	0	0	0	0
chr2L	17951691	17952191	501	*	0	1	0	0	0	0
chr2L	17960134	17960634	501	*	0	1	0	0	0	0
chr2L	17963027	17963573	547	*	1	0	1	1	1	1
chr2L	18011276	18011776	501	*	1	0	0	0	0	0
chr2L	18032639	18033139	501	*	0	1	0	0	0	0
chr2L	18063080	18063580	501	*	0	1	0	0	0	0
chr2L	18067208	18067708	501	*	0	1	0	0	0	0
chr2L	18116873	18117373	501	*	0	1	0	0	0	0
chr2L	18137782	18138282	501	*	0	0	1	0	0	0
chr2L	18142878	18143483	606	*	0	0	0	1	1	0
chr2L	18144650	18145150	501	*	1	0	0	0	0	0
chr2L	18147915	18148415	501	*	0	0	1	0	0	0
chr2L	18151325	18152109	785	*	1	0	0	0	0	1
chr2L	18152142	18152818	677	*	0	1	0	1	1	0
chr2L	18158371	18159031	661	*	1	1	1	1	1	1
chr2L	18184573	18185468	896	*	0	0	1	1	0	1
chr2L	18284092	18284592	501	*	0	1	0	0	0	0
chr2L	18294353	18294853	501	*	0	1	0	0	0	0
chr2L	18297933	18298433	501	*	0	1	0	0	0	0
chr2L	18305637	18306137	501	*	0	0	1	0	0	0
chr2L	18317617	18318132	516	*	0	0	1	1	0	0
chr2L	18333712	18334212	501	*	1	0	0	0	0	0
chr2L	18334506	18335006	501	*	0	0	1	0	0	0
chr2L	18335469	18335969	501	*	0	0	0	1	0	0
chr2L	18336184	18337049	866	*	1	0	1	0	0	1
chr2L	18337145	18337645	501	*	0	0	0	1	0	0
chr2L	18347895	18348395	501	*	0	1	0	0	0	0
chr2L	18353362	18353862	501	*	1	0	0	0	0	0
chr2L	18361103	18361603	501	*	1	0	0	0	0	0
chr2L	18369337	18369837	501	*	1	0	0	0	0	0
chr2L	18387689	18388189	501	*	0	0	0	0	1	0
chr2L	18441174	18441674	501	*	0	1	0	0	0	0
chr2L	18442995	18443555	561	*	1	1	1	1	0	0
chr2L	18448685	18449190	506	*	1	1	1	1	0	0
chr2L	18454334	18454842	509	*	0	1	1	1	0	0
chr2L	18456914	18457414	501	*	0	0	0	1	0	0
chr2L	18459789	18460359	571	*	0	0	0	1	0	1
chr2L	18465950	18466450	501	*	0	0	0	1	0	0
chr2L	18477235	18477735	501	*	0	0	0	1	0	0
chr2L	18480347	18480847	501	*	0	0	0	1	0	0
chr2L	18481920	18482420	501	*	0	0	1	0	0	0
chr2L	18484880	18485528	649	*	1	0	0	0	1	0
chr2L	18496730	18497230	501	*	0	0	0	0	1	0
chr2L	18497599	18498099	501	*	0	0	0	0	0	1
chr2L	18501461	18502036	576	*	0	0	0	0	1	1
chr2L	18503603	18504103	501	*	0	0	0	1	0	0
chr2L	18504566	18505724	1159	*	1	0	1	0	1	0
chr2L	18505734	18506234	501	*	0	0	0	1	0	0
chr2L	18512637	18513137	501	*	0	0	0	1	0	0
chr2L	18516335	18516835	501	*	0	1	0	0	0	0
chr2L	18557420	18557920	501	*	0	0	0	0	0	1
chr2L	18562988	18563551	564	*	0	0	1	1	1	1
chr2L	18571654	18572518	865	*	0	0	1	1	0	1
chr2L	18590346	18591160	815	*	1	1	1	1	1	1
chr2L	18598210	18598710	501	*	1	0	0	0	0	0
chr2L	18604725	18605225	501	*	0	0	0	1	0	0
chr2L	18606623	18607139	517	*	1	0	1	1	1	1
chr2L	18616040	18616540	501	*	1	0	0	0	0	0
chr2L	18617028	18617528	501	*	0	0	0	1	0	0
chr2L	18620063	18620563	501	*	0	0	0	0	0	1
chr2L	18621472	18621994	523	*	0	0	1	1	0	0
chr2L	18625342	18625842	501	*	1	0	0	0	0	0
chr2L	18628773	18629273	501	*	1	0	0	0	0	0
chr2L	18632677	18633177	501	*	0	0	0	1	0	0
chr2L	18647216	18647716	501	*	0	0	0	0	0	1
chr2L	18647756	18648406	651	*	0	0	0	1	1	0
chr2L	18652523	18653023	501	*	1	0	0	0	0	0
chr2L	18665820	18666382	563	*	1	1	1	1	0	0
chr2L	18676910	18677789	880	*	1	0	1	1	1	1
chr2L	18681774	18682302	529	*	1	0	1	1	0	0
chr2L	18688567	18689283	717	*	1	1	1	1	0	0
chr2L	18695271	18696003	733	*	1	0	1	1	1	1
chr2L	18698485	18698990	506	*	1	0	1	1	0	0
chr2L	18703189	18703701	513	*	1	1	1	1	1	1
chr2L	18705475	18706107	633	*	0	0	1	1	0	0
chr2L	18708131	18708847	717	*	1	1	1	1	1	1
chr2L	18714001	18714501	501	*	0	1	0	0	0	0
chr2L	18735491	18735991	501	*	0	0	0	0	1	0
chr2L	18737146	18737733	588	*	1	0	1	1	0	0
chr2L	18775070	18775570	501	*	1	0	0	0	0	0
chr2L	18776478	18776989	512	*	0	1	1	1	0	0
chr2L	18778155	18778655	501	*	1	0	0	0	0	0
chr2L	18782861	18783747	887	*	0	0	1	1	1	1
chr2L	18795815	18796315	501	*	0	0	0	1	0	0
chr2L	18796748	18797265	518	*	0	0	0	0	1	1
chr2L	18799584	18800123	540	*	0	0	1	1	1	0
chr2L	18801614	18802114	501	*	1	0	0	0	0	0
chr2L	18803119	18803710	592	*	0	0	1	0	1	0
chr2L	18808682	18809182	501	*	1	0	0	0	0	0
chr2L	18812537	18813037	501	*	0	0	0	0	1	0
chr2L	18817832	18818598	767	*	1	1	0	0	0	0
chr2L	18822795	18823295	501	*	0	0	0	0	1	0
chr2L	18823332	18823832	501	*	0	0	0	1	0	0
chr2L	18830669	18831291	623	*	1	1	1	1	1	1
chr2L	18839317	18839979	663	*	1	1	1	1	1	1
chr2L	18857612	18858112	501	*	0	0	0	1	0	0
chr2L	18859013	18859597	585	*	1	1	1	1	1	1
chr2L	18866581	18867081	501	*	0	0	0	1	0	0
chr2L	18875205	18875797	593	*	1	0	1	0	0	0
chr2L	18878270	18878844	575	*	0	0	1	0	1	0
chr2L	18881285	18881836	552	*	1	0	1	1	0	0
chr2L	18885512	18886012	501	*	1	0	0	0	0	0
chr2L	18892842	18893342	501	*	0	0	1	0	0	0
chr2L	18893900	18894400	501	*	1	0	0	0	0	0
chr2L	18895265	18895765	501	*	1	0	0	0	0	0
chr2L	18897732	18898232	501	*	1	0	0	0	0	0
chr2L	18899180	18899974	795	*	0	0	1	1	1	1
chr2L	18906432	18906940	509	*	0	0	1	1	0	0
chr2L	18912790	18913290	501	*	0	0	0	1	0	0
chr2L	18915398	18915898	501	*	1	0	0	0	0	0
chr2L	18917578	18918078	501	*	1	0	0	0	0	0
chr2L	18925683	18926183	501	*	1	0	0	0	0	0
chr2L	18930284	18930784	501	*	0	1	0	0	0	0
chr2L	18935973	18936532	560	*	1	0	1	1	0	0
chr2L	18943681	18944607	927	*	1	1	1	1	1	1
chr2L	18947571	18948282	712	*	1	0	1	1	0	0
chr2L	18948618	18949190	573	*	0	1	0	0	1	1
chr2L	18951519	18952052	534	*	1	1	1	1	1	1
chr2L	18954591	18955091	501	*	0	0	1	0	0	0
chr2L	18957254	18957754	501	*	0	0	1	0	0	0
chr2L	18965425	18965925	501	*	0	0	0	0	1	0
chr2L	18967322	18967822	501	*	1	0	0	0	0	0
chr2L	18968576	18969287	712	*	1	1	1	1	1	1
chr2L	18974052	18974957	906	*	1	1	1	1	1	1
chr2L	18976703	18977203	501	*	1	0	0	0	0	0
chr2L	18980312	18981057	746	*	0	0	0	1	0	1
chr2L	18981669	18982180	512	*	0	0	1	1	0	0
chr2L	18982480	18982980	501	*	1	0	0	0	0	0
chr2L	18987238	18988005	768	*	1	1	1	1	1	1
chr2L	19009039	19009673	635	*	1	1	1	1	1	1
chr2L	19034325	19034855	531	*	1	1	1	1	0	0
chr2L	19037081	19037816	736	*	0	0	1	1	1	1
chr2L	19045110	19045631	522	*	1	1	1	1	1	1
chr2L	19053835	19054597	763	*	1	1	1	1	1	1
chr2L	19063063	19063584	522	*	0	0	0	1	1	0
chr2L	19064712	19065212	501	*	1	0	0	0	0	0
chr2L	19068688	19069197	510	*	0	0	0	0	1	1
chr2L	19075233	19075733	501	*	1	0	0	0	0	0
chr2L	19083207	19083707	501	*	1	0	0	0	0	0
chr2L	19095707	19096207	501	*	1	0	0	0	0	0
chr2L	19098551	19099051	501	*	0	0	0	1	0	0
chr2L	19108463	19108984	522	*	0	0	1	1	0	0
chr2L	19114063	19114627	565	*	1	0	1	1	1	1
chr2L	19123557	19124137	581	*	0	0	0	1	1	0
chr2L	19126722	19127435	714	*	1	0	1	1	1	0
chr2L	19131690	19132501	812	*	1	0	1	1	0	1
chr2L	19133228	19134466	1239	*	0	1	1	0	1	1
chr2L	19134582	19135422	841	*	1	0	0	1	0	1
chr2L	19146084	19146584	501	*	1	0	0	0	0	0
chr2L	19154896	19155396	501	*	1	0	0	0	0	0
chr2L	19158268	19159212	945	*	0	0	1	1	1	1
chr2L	19181085	19182005	921	*	1	1	1	1	1	1
chr2L	19185804	19186323	520	*	1	1	1	1	1	1
chr2L	19190074	19190649	576	*	0	0	1	0	1	1
chr2L	19191553	19192053	501	*	0	0	1	0	0	0
chr2L	19204444	19204944	501	*	0	0	0	1	0	0
chr2L	19219093	19219698	606	*	0	0	1	0	1	0
chr2L	19219712	19220212	501	*	1	0	0	0	0	0
chr2L	19225490	19225990	501	*	0	0	0	0	1	0
chr2L	19226115	19226615	501	*	0	0	0	1	0	0
chr2L	19245789	19246289	501	*	0	1	0	0	0	0
chr2L	19247527	19248027	501	*	0	0	0	1	0	0
chr2L	19270615	19271115	501	*	0	1	0	0	0	0
chr2L	19273750	19274282	533	*	0	0	1	1	0	0
chr2L	19281822	19282322	501	*	0	1	0	0	0	0
chr2L	19287152	19287678	527	*	1	0	1	1	0	0
chr2L	19296861	19297361	501	*	0	0	0	1	0	0
chr2L	19308973	19309473	501	*	0	1	0	0	0	0
chr2L	19312176	19312676	501	*	0	0	0	1	0	0
chr2L	19313428	19313928	501	*	1	0	0	0	0	0
chr2L	19317047	19317547	501	*	0	0	0	1	0	0
[truncated: 11,694 more rows]

## Sheet: IDR pseudoreplicates
ab	tp	individual	IDR_thres	pooled_pseudorep	self_pseudorep1	self_pseudorep2	true_rep	quality_warn	quality_fail
mef2	68	399_399	0.01	5476	3769	5249	4791	FALSE	FALSE
mef2	68	399_399	0.02	5785	4245	5702	5455	FALSE	FALSE
mef2	68	399_399	0.05	6172	4781	6235	6128	FALSE	FALSE
mef2	68	vgn_28	0.01	4024	3387	2671	3485	FALSE	FALSE
mef2	68	vgn_28	0.02	4358	3844	3035	3898	FALSE	FALSE
mef2	68	vgn_28	0.05	4752	4357	3469	4349	FALSE	FALSE
mef2	68	vgn_307	0.01	2054	1423	1432	1378	FALSE	FALSE
mef2	68	vgn_307	0.02	2432	1641	1729	1706	FALSE	FALSE
mef2	68	vgn_307	0.05	3101	1963	2254	2264	FALSE	FALSE
mef2	68	vgn_399	0.01	4818	2233	4709	3873	TRUE	FALSE
mef2	68	vgn_399	0.02	5136	2641	5106	4268	FALSE	FALSE
mef2	68	vgn_399	0.05	5541	3121	5561	4740	FALSE	FALSE
mef2	68	vgn_57	0.01	4386	4343	1900	2598	TRUE	FALSE
mef2	68	vgn_57	0.02	4643	4732	2231	2957	TRUE	FALSE
mef2	68	vgn_57	0.05	4980	5165	2659	3365	FALSE	FALSE
mef2	68	vgn_639	0.01	5391	4227	4565	5488	FALSE	FALSE
mef2	68	vgn_639	0.02	5672	4632	4970	5866	FALSE	FALSE
mef2	68	vgn_639	0.05	6033	5096	5460	6326	FALSE	FALSE
mef2	68	vgn_712	0.01	3098	1975	2688	2714	FALSE	FALSE
mef2	68	vgn_712	0.02	3390	2245	3101	3020	FALSE	FALSE
mef2	68	vgn_712	0.05	3735	2600	3564	3391	FALSE	FALSE
mef2	68	vgn_714	0.01	4080	2599	3578	3738	FALSE	FALSE
mef2	68	vgn_714	0.02	4437	3042	3998	4228	FALSE	FALSE
mef2	68	vgn_714	0.05	4860	3564	4491	4769	FALSE	FALSE
mef2	68	vgn_852	0.01	5134	4391	4334	5070	FALSE	FALSE
mef2	68	vgn_852	0.02	5404	4855	4699	5451	FALSE	FALSE
mef2	68	vgn_852	0.05	5753	5377	5100	5860	FALSE	FALSE
mef2	68	vgn_vgn	0.01	3772	2438	2801	3711	FALSE	FALSE
mef2	68	vgn_vgn	0.02	4082	2859	3198	4079	FALSE	FALSE
mef2	68	vgn_vgn	0.05	4450	3381	3667	4519	FALSE	FALSE
mef2	1012	399_399	0.01	5866	5436	3665	4918	FALSE	FALSE
mef2	1012	399_399	0.02	6130	5753	4081	5263	FALSE	FALSE
mef2	1012	399_399	0.05	6483	6141	4564	5679	FALSE	FALSE
mef2	1012	vgn_28	0.01	5713	4592	4664	5432	FALSE	FALSE
mef2	1012	vgn_28	0.02	5960	5011	5032	5781	FALSE	FALSE
mef2	1012	vgn_28	0.05	6284	5465	5458	6181	FALSE	FALSE
mef2	1012	vgn_307	0.01	3822	2797	2433	3512	FALSE	FALSE
mef2	1012	vgn_307	0.02	4139	3194	2877	3893	FALSE	FALSE
mef2	1012	vgn_307	0.05	4552	3690	3391	4332	FALSE	FALSE
mef2	1012	vgn_399	0.01	5462	4680	4060	4931	FALSE	FALSE
mef2	1012	vgn_399	0.02	5734	5058	4478	5280	FALSE	FALSE
mef2	1012	vgn_399	0.05	6082	5492	4974	5692	FALSE	FALSE
mef2	1012	vgn_57	0.01	4798	4863	1398	1422	TRUE	FALSE
mef2	1012	vgn_57	0.02	5045	5193	1636	1759	TRUE	FALSE
mef2	1012	vgn_57	0.05	5370	5580	1988	2142	TRUE	FALSE
mef2	1012	vgn_639	0.01	6663	6319	5136	6367	FALSE	FALSE
mef2	1012	vgn_639	0.02	6879	6597	5532	6671	FALSE	FALSE
mef2	1012	vgn_639	0.05	7202	6957	5974	7054	FALSE	FALSE
mef2	1012	vgn_712	0.01	5611	5298	2331	2766	TRUE	FALSE
mef2	1012	vgn_712	0.02	5882	5657	2697	3245	TRUE	FALSE
mef2	1012	vgn_712	0.05	6245	6089	3158	3782	FALSE	FALSE
mef2	1012	vgn_714	0.01	1666	354	2991	130	TRUE	TRUE
mef2	1012	vgn_714	0.02	1942	413	3483	191	TRUE	TRUE
mef2	1012	vgn_714	0.05	2350	519	4050	320	TRUE	TRUE
mef2	1012	vgn_852	0.01	6431	6134	4975	6111	FALSE	FALSE
mef2	1012	vgn_852	0.02	6686	6426	5417	6486	FALSE	FALSE
mef2	1012	vgn_852	0.05	7036	6798	5923	6902	FALSE	FALSE
mef2	1012	vgn_vgn	0.01	5696	2667	5755	3954	TRUE	FALSE
mef2	1012	vgn_vgn	0.02	5984	3155	6060	4503	FALSE	FALSE
mef2	1012	vgn_vgn	0.05	6347	3724	6437	5082	FALSE	FALSE
bin	68	399_399	0.01	3263	1452	2953	2375	TRUE	FALSE
bin	68	399_399	0.02	3644	1860	3349	2834	FALSE	FALSE
bin	68	399_399	0.05	4080	2415	3812	3341	FALSE	FALSE
bin	68	vgn_28	0.01	2964	2333	1924	2423	FALSE	FALSE
bin	68	vgn_28	0.02	3245	2761	2189	2808	FALSE	FALSE
bin	68	vgn_28	0.05	3584	3298	2522	3272	FALSE	FALSE
bin	68	vgn_307	0.01	1957	933	1370	1693	FALSE	FALSE
bin	68	vgn_307	0.02	2227	1147	1621	1982	FALSE	FALSE
bin	68	vgn_307	0.05	2565	1486	1978	2355	FALSE	FALSE
bin	68	vgn_399	0.01	3486	1661	2905	2801	FALSE	FALSE
bin	68	vgn_399	0.02	3881	2028	3381	3245	FALSE	FALSE
bin	68	vgn_399	0.05	4359	2558	3942	3762	FALSE	FALSE
bin	68	vgn_57	0.01	4114	3396	2694	3667	FALSE	FALSE
bin	68	vgn_57	0.02	4374	3757	3010	4011	FALSE	FALSE
bin	68	vgn_57	0.05	4709	4195	3399	4405	FALSE	FALSE
bin	68	vgn_639	0.01	3600	2482	2816	3293	FALSE	FALSE
bin	68	vgn_639	0.02	3970	2905	3220	3706	FALSE	FALSE
bin	68	vgn_639	0.05	4406	3445	3710	4158	FALSE	FALSE
bin	68	vgn_712	0.01	3224	1487	3034	2235	TRUE	FALSE
bin	68	vgn_712	0.02	3472	1724	3328	2556	FALSE	FALSE
bin	68	vgn_712	0.05	3784	2042	3687	2978	FALSE	FALSE
bin	68	vgn_714	0.01	3054	1327	2943	2381	TRUE	FALSE
bin	68	vgn_714	0.02	3347	1643	3260	2722	FALSE	FALSE
bin	68	vgn_714	0.05	3712	2078	3625	3147	FALSE	FALSE
bin	68	vgn_852	0.01	4070	2206	3486	3701	FALSE	FALSE
bin	68	vgn_852	0.02	4380	2698	3796	4099	FALSE	FALSE
bin	68	vgn_852	0.05	4745	3265	4169	4521	FALSE	FALSE
bin	68	vgn_vgn	0.01	3583	1403	3189	1939	TRUE	FALSE
bin	68	vgn_vgn	0.02	3836	1690	3541	2288	TRUE	FALSE
bin	68	vgn_vgn	0.05	4145	2115	3948	2707	FALSE	FALSE
bin	1012	399_399	0.01	3929	3391	1874	3361	FALSE	FALSE
bin	1012	399_399	0.02	4295	3848	2319	3841	FALSE	FALSE
bin	1012	399_399	0.05	4759	4377	2915	4362	FALSE	FALSE
bin	1012	vgn_28	0.01	2953	1903	2286	2706	FALSE	FALSE
bin	1012	vgn_28	0.02	3248	2232	2589	3038	FALSE	FALSE
bin	1012	vgn_28	0.05	3652	2684	2973	3450	FALSE	FALSE
bin	1012	vgn_307	0.01	1200	988	555	998	FALSE	FALSE
bin	1012	vgn_307	0.02	1414	1172	669	1198	FALSE	FALSE
bin	1012	vgn_307	0.05	1755	1456	872	1522	FALSE	FALSE
bin	1012	vgn_399	0.01	3361	2229	2395	2791	FALSE	FALSE
bin	1012	vgn_399	0.02	3725	2698	2768	3248	FALSE	FALSE
bin	1012	vgn_399	0.05	4153	3298	3243	3803	FALSE	FALSE
bin	1012	vgn_57	0.01	3142	2985	779	1097	TRUE	FALSE
bin	1012	vgn_57	0.02	3427	3413	936	1368	TRUE	FALSE
bin	1012	vgn_57	0.05	3786	3926	1210	1736	TRUE	FALSE
bin	1012	vgn_639	0.01	4877	4282	2939	4237	FALSE	FALSE
bin	1012	vgn_639	0.02	5281	4802	3490	4721	FALSE	FALSE
bin	1012	vgn_639	0.05	5760	5364	4150	5224	FALSE	FALSE
bin	1012	vgn_712	0.01	2343	2290	812	1158	TRUE	FALSE
bin	1012	vgn_712	0.02	2662	2752	997	1480	TRUE	FALSE
bin	1012	vgn_712	0.05	3104	3389	1303	1994	TRUE	FALSE
bin	1012	vgn_714	0.01	345	117	691	51	TRUE	TRUE
bin	1012	vgn_714	0.02	421	141	885	74	TRUE	TRUE
bin	1012	vgn_714	0.05	565	188	1230	115	TRUE	TRUE
bin	1012	vgn_852	0.01	4204	2903	2890	3672	FALSE	FALSE
bin	1012	vgn_852	0.02	4599	3391	3420	4174	FALSE	FALSE
bin	1012	vgn_852	0.05	5042	3965	4063	4747	FALSE	FALSE
bin	1012	vgn_vgn	0.01	3078	1335	2475	2258	FALSE	FALSE
bin	1012	vgn_vgn	0.02	3477	1673	2931	2761	FALSE	FALSE
bin	1012	vgn_vgn	0.05	3964	2193	3481	3366	FALSE	FALSE
ctcf	68	399_399	0.01	4266	1455	1723	2834	FALSE	FALSE
ctcf	68	399_399	0.02	4446	1475	1751	2955	FALSE	FALSE
ctcf	68	399_399	0.05	4630	1524	1810	3129	FALSE	FALSE
ctcf	68	vgn_28	0.01	1904	1542	1331	2523	FALSE	FALSE
ctcf	68	vgn_28	0.02	1932	1567	1350	2626	FALSE	FALSE
ctcf	68	vgn_28	0.05	1997	1619	1393	2774	FALSE	FALSE
ctcf	68	vgn_307	0.01	3920	1599	1641	3029	FALSE	FALSE
ctcf	68	vgn_307	0.02	4099	1621	1668	3132	FALSE	FALSE
ctcf	68	vgn_307	0.05	4292	1674	1726	3288	FALSE	FALSE
ctcf	68	vgn_399	0.01	3792	1351	1289	2708	FALSE	FALSE
ctcf	68	vgn_399	0.02	3997	1371	1306	2810	FALSE	FALSE
ctcf	68	vgn_399	0.05	4208	1417	1350	2960	FALSE	FALSE
ctcf	68	vgn_57	0.01	2052	2000	1261	1648	FALSE	FALSE
ctcf	68	vgn_57	0.02	2083	2033	1280	1923	FALSE	FALSE
ctcf	68	vgn_57	0.05	2152	2103	1322	2230	FALSE	FALSE
ctcf	68	vgn_639	0.01	1714	1603	1339	2857	FALSE	FALSE
ctcf	68	vgn_639	0.02	1736	1628	1362	3066	FALSE	FALSE
ctcf	68	vgn_639	0.05	1792	1683	1411	3335	FALSE	FALSE
ctcf	68	vgn_712	0.01	3616	2804	1480	2568	FALSE	FALSE
ctcf	68	vgn_712	0.02	3790	2895	1505	2765	FALSE	FALSE
ctcf	68	vgn_712	0.05	3983	3035	1555	2991	FALSE	FALSE
ctcf	68	vgn_714	0.01	2096	1369	1758	2569	FALSE	FALSE
ctcf	68	vgn_714	0.02	2124	1387	1783	2692	FALSE	FALSE
ctcf	68	vgn_714	0.05	2194	1432	1843	2874	FALSE	FALSE
ctcf	68	vgn_852	0.01	1811	1264	1267	1816	FALSE	FALSE
ctcf	68	vgn_852	0.02	1836	1284	1286	1863	FALSE	FALSE
ctcf	68	vgn_852	0.05	1896	1326	1329	1945	FALSE	FALSE
ctcf	68	vgn_vgn	0.01	1772	1195	1343	2767	FALSE	FALSE
ctcf	68	vgn_vgn	0.02	1796	1210	1360	2881	FALSE	FALSE
ctcf	68	vgn_vgn	0.05	1855	1249	1404	3044	FALSE	FALSE
zld	24	399_399	0.01	5685	3917	5146	5090	FALSE	FALSE
zld	24	399_399	0.02	5982	4262	5475	5518	FALSE	FALSE
zld	24	399_399	0.05	6376	4655	5884	6008	FALSE	FALSE
zld	24	vgn_28	0.01	5818	4120	5174	3362	FALSE	FALSE
zld	24	vgn_28	0.02	6078	4475	5448	4787	FALSE	FALSE
zld	24	vgn_28	0.05	6427	4881	5821	6120	FALSE	FALSE
zld	24	vgn_307	0.01	5070	3630	4398	4504	FALSE	FALSE
zld	24	vgn_307	0.02	5316	3918	4583	4901	FALSE	FALSE
zld	24	vgn_307	0.05	5639	4250	4851	5350	FALSE	FALSE
zld	24	vgn_399	0.01	5868	3974	5455	5266	FALSE	FALSE
zld	24	vgn_399	0.02	6053	4269	5637	5851	FALSE	FALSE
zld	24	vgn_399	0.05	6342	4607	5908	6376	FALSE	FALSE
zld	24	vgn_57	0.01	5134	4448	4279	4951	FALSE	FALSE
zld	24	vgn_57	0.02	5307	4608	4487	5221	FALSE	FALSE
zld	24	vgn_57	0.05	5559	4835	4765	5538	FALSE	FALSE
zld	24	vgn_639	0.01	6278	4869	5832	5967	FALSE	FALSE
zld	24	vgn_639	0.02	6455	5173	6038	6425	FALSE	FALSE
zld	24	vgn_639	0.05	6739	5542	6339	6876	FALSE	FALSE
zld	24	vgn_712	0.01	5577	4992	4181	4878	FALSE	FALSE
zld	24	vgn_712	0.02	5797	5196	4443	5253	FALSE	FALSE
zld	24	vgn_712	0.05	6107	5473	4773	5695	FALSE	FALSE
zld	24	vgn_714	0.01	5805	5617	4348	5685	FALSE	FALSE
zld	24	vgn_714	0.02	6024	5865	4583	6025	FALSE	FALSE
zld	24	vgn_714	0.05	6340	6210	4877	6421	FALSE	FALSE
zld	24	vgn_852	0.01	5813	4552	5241	5632	FALSE	FALSE
zld	24	vgn_852	0.02	6007	4809	5448	6002	FALSE	FALSE
zld	24	vgn_852	0.05	6298	5132	5740	6407	FALSE	FALSE
zld	24	vgn_vgn	0.01	5266	4653	4157	4462	FALSE	FALSE
zld	24	vgn_vgn	0.02	5461	4981	4311	5122	FALSE	FALSE
zld	24	vgn_vgn	0.05	5744	5367	4527	5737	FALSE	FALSE
twi	24	399_399	0.01	3992	2947	2904	3193	FALSE	FALSE
twi	24	399_399	0.02	4426	3371	3377	3812	FALSE	FALSE
twi	24	399_399	0.05	5010	3917	4055	4679	FALSE	FALSE
twi	24	vgn_28	0.01	4649	3904	2410	2452	FALSE	FALSE
twi	24	vgn_28	0.02	5065	4390	2807	3304	FALSE	FALSE
twi	24	vgn_28	0.05	5535	4958	3329	4261	FALSE	FALSE
twi	24	vgn_307	0.01	3154	1346	2894	2136	TRUE	FALSE
twi	24	vgn_307	0.02	3500	1600	3265	2557	TRUE	FALSE
twi	24	vgn_307	0.05	3962	2051	3735	3152	FALSE	FALSE
twi	24	vgn_399	0.01	5780	4062	5588	5208	FALSE	FALSE
twi	24	vgn_399	0.02	6112	4636	6064	5948	FALSE	FALSE
twi	24	vgn_399	0.05	6539	5262	6618	6725	FALSE	FALSE
twi	24	vgn_57	0.01	4165	2704	3348	3793	FALSE	FALSE
twi	24	vgn_57	0.02	4520	3064	3726	4250	FALSE	FALSE
twi	24	vgn_57	0.05	4991	3520	4194	4809	FALSE	FALSE
twi	24	vgn_639	0.01	7052	4572	6602	6108	FALSE	FALSE
twi	24	vgn_639	0.02	7395	5130	7012	7027	FALSE	FALSE
twi	24	vgn_639	0.05	7840	5765	7487	7931	FALSE	FALSE
twi	24	vgn_712	0.01	3622	2820	2317	3285	FALSE	FALSE
twi	24	vgn_712	0.02	3987	3267	2682	3731	FALSE	FALSE
twi	24	vgn_712	0.05	4444	3843	3153	4242	FALSE	FALSE
twi	24	vgn_714	0.01	4104	3033	3458	4004	FALSE	FALSE
twi	24	vgn_714	0.02	4509	3500	3962	4469	FALSE	FALSE
twi	24	vgn_714	0.05	5022	4079	4572	5035	FALSE	FALSE
twi	24	vgn_852	0.01	6607	4777	5731	6146	FALSE	FALSE
twi	24	vgn_852	0.02	6997	5306	6234	6813	FALSE	FALSE
twi	24	vgn_852	0.05	7488	5900	6815	7536	FALSE	FALSE
twi	24	vgn_vgn	0.01	4374	3573	3327	3845	FALSE	FALSE
twi	24	vgn_vgn	0.02	4756	4129	3785	4611	FALSE	FALSE
twi	24	vgn_vgn	0.05	5225	4782	4307	5411	FALSE	FALSE

## Sheet: README
Supplemental Table S2: Consensus peaks set and IDR pseudoreplicates
ChIP-seq consensus peak set across transcription factors and time-points. Peak activity per condition is binarized (0: peak is not present; 1: peak is present). The second sheet reports the pooled and self pseudoreplicates IDR peaks numbers as a metric for peak calling reproducibility.
