# Supplementary material for: Integrating genetic variation with deep learning provides context for variants impacting transcription factor binding during embryogenesis
Source: Genome Res. 2025 May;35(5):1138–53. doi: 10.1101/gr.279652.124 (PMC12047541; doi:10.1101/gr.279652.124)
Supplement: Supplement 3 [file Supplemental_Table_S3.xlsx]

## Sheet: Sheet1
condition	motif	motif_set	share_ns	share_sign_weak	share_sign_strong
twi/24	M4670_1.02	selected_motifs	0.0021	0.0052	0.003
twi/24	flyfactor_mef2_optimized_furlong	selected_motifs	0.0046	0.0034	0.006
twi/24	berkeley_bdtnp_twi	selected_motifs	0.0019	0.0034	0.0285
twi/24	flyfactor_bin_optimized_furlong	selected_motifs	0.0081	0.0034	0.012
ctcf/68	M4670_1.02	selected_motifs	0.0046	0.016	0.0988
ctcf/68	flyfactor_mef2_optimized_furlong	selected_motifs	0.0041	0.006	0.0115
ctcf/68	berkeley_bdtnp_twi	selected_motifs	0.001	0.0059	0.003
ctcf/68	flyfactor_bin_optimized_furlong	selected_motifs	0.0056	0.0099	0.0147
bin/68	M4670_1.02	selected_motifs	0.0029	0.0086	0
bin/68	flyfactor_mef2_optimized_furlong	selected_motifs	0.0043	0	0.0235
bin/68	berkeley_bdtnp_twi	selected_motifs	0.0023	0	0
bin/68	flyfactor_bin_optimized_furlong	selected_motifs	0.0075	0.0386	0.0866
bin/1012	M4670_1.02	selected_motifs	0.0028	0	0
bin/1012	flyfactor_mef2_optimized_furlong	selected_motifs	0.0039	0	0
bin/1012	berkeley_bdtnp_twi	selected_motifs	0.0028	0	0
bin/1012	flyfactor_bin_optimized_furlong	selected_motifs	0.0121	0.0354	0.0784
mef2/68	M4670_1.02	selected_motifs	0.0031	0	0
mef2/68	flyfactor_mef2_optimized_furlong	selected_motifs	0.0047	0.0159	0.0486
mef2/68	berkeley_bdtnp_twi	selected_motifs	0.0016	0.0023	0.0029
mef2/68	flyfactor_bin_optimized_furlong	selected_motifs	0.009	0.0114	0.02
mef2/1012	M4670_1.02	selected_motifs	0.0035	0.0045	0.0076
mef2/1012	flyfactor_mef2_optimized_furlong	selected_motifs	0.0053	0.0135	0.0431
mef2/1012	berkeley_bdtnp_twi	selected_motifs	0.0027	0	0.0051
mef2/1012	flyfactor_bin_optimized_furlong	selected_motifs	0.0063	0.009	0.0152
twi/24	M2328_1.02	cisbp_motifs	0.0056	0.0034	0.0105
twi/24	M4876_1.02	cisbp_motifs	0.0152	0.012	0.0135
twi/24	M5065_1.02	cisbp_motifs	0.0163	0.0103	0.018
twi/24	M4898_1.02	cisbp_motifs	0.0123	0.0069	0.0181
twi/24	M5006_1.02	cisbp_motifs	0.0056	0.0086	0.0075
twi/24	M4870_1.02	cisbp_motifs	0.0086	0.0068	0.0181
twi/24	M1912_1.02	cisbp_motifs	0.0044	0.0017	0.003
twi/24	M5215_1.02	cisbp_motifs	0.015	0.024	0.0211
twi/24	M4674_1.02	cisbp_motifs	0.0036	0	0.0015
twi/24	M2325_1.02	cisbp_motifs	0.005	0.0051	0.006
twi/24	M5151_1.02	cisbp_motifs	0.0056	0.0052	0.0075
twi/24	M5168_1.02	cisbp_motifs	0.0323	0.0325	0.0407
twi/24	M5211_1.02	cisbp_motifs	0.0255	0.0154	0.0286
twi/24	M5148_1.02	cisbp_motifs	0.0056	0.0017	0.0045
twi/24	M2327_1.02	cisbp_motifs	0.0044	0.0017	0.0015
twi/24	M6459_1.02	cisbp_motifs	0.0075	0.0103	0.0106
twi/24	M4880_1.02	cisbp_motifs	0.0046	0.0103	0.0045
twi/24	M6166_1.02	cisbp_motifs	0.0029	0.0103	0.0045
twi/24	M5003_1.02	cisbp_motifs	0.0019	0.0034	0.003
twi/24	M6235_1.02	cisbp_motifs	0.0046	0	0.009
twi/24	M5048_1.02	cisbp_motifs	0.0286	0.024	0.0287
twi/24	M4860_1.02	cisbp_motifs	0.0054	0.0069	0.0135
twi/24	M5660_1.02	cisbp_motifs	0.0035	0.0034	0.006
twi/24	M5037_1.02	cisbp_motifs	0.0033	0.0034	0.0045
twi/24	M4885_1.02	cisbp_motifs	0.004	0.0034	0.006
twi/24	M5203_1.02	cisbp_motifs	0.0035	0	0.009
twi/24	M4672_1.02	cisbp_motifs	0.005	0.0052	0.0105
twi/24	M4866_1.02	cisbp_motifs	0.0048	0.0069	0.012
twi/24	M5222_1.02	cisbp_motifs	0.0029	0.0034	0.0045
twi/24	M4850_1.02	cisbp_motifs	0.0085	0.0223	0.0256
twi/24	M2259_1.02	cisbp_motifs	0.0056	0.0034	0.012
twi/24	M5102_1.02	cisbp_motifs	0.0071	0.0052	0.0165
twi/24	M4889_1.02	cisbp_motifs	0.0069	0.0017	0.0045
twi/24	M4842_1.02	cisbp_motifs	0.0035	0.0051	0.006
twi/24	M1890_1.02	cisbp_motifs	0.005	0.0051	0.0045
twi/24	M5186_1.02	cisbp_motifs	0.0036	0.0017	0.009
twi/24	M5158_1.02	cisbp_motifs	0.0042	0.0034	0.0135
twi/24	M4722_1.02	cisbp_motifs	0.0044	0.0034	0.012
twi/24	M5079_1.02	cisbp_motifs	0.0067	0.0069	0.012
twi/24	M5030_1.02	cisbp_motifs	0.0052	0.0052	0.003
twi/24	M5219_1.02	cisbp_motifs	0.0056	0.0034	0.015
twi/24	M6501_1.02	cisbp_motifs	0.0067	0.0103	0.0286
twi/24	M5244_1.02	cisbp_motifs	0.0031	0.0069	0.0045
twi/24	M4865_1.02	cisbp_motifs	0.0102	0.012	0.018
twi/24	M4633_1.02	cisbp_motifs	0.0021	0.0034	0.0015
twi/24	M4867_1.02	cisbp_motifs	0.0035	0.0052	0.003
twi/24	M5185_1.02	cisbp_motifs	0.0017	0	0.003
twi/24	M4900_1.02	cisbp_motifs	0.0013	0	0.003
twi/24	M4819_1.02	cisbp_motifs	0.0025	0.0068	0
twi/24	M5039_1.02	cisbp_motifs	0.0015	0.0017	0.0015
twi/24	M4879_1.02	cisbp_motifs	0.0031	0.0051	0.003
twi/24	M4873_1.02	cisbp_motifs	0.0025	0	0.003
twi/24	M5209_1.02	cisbp_motifs	0.0061	0.0069	0.0045
twi/24	M4824_1.02	cisbp_motifs	0.0042	0.0034	0.006
twi/24	M4802_1.02	cisbp_motifs	0.0029	0.0051	0
twi/24	M4897_1.02	cisbp_motifs	0.0017	0	0.0045
twi/24	M4927_1.02	cisbp_motifs	0.0035	0	0
twi/24	M4748_1.02	cisbp_motifs	0.004	0	0.003
twi/24	M4837_1.02	cisbp_motifs	0.0075	0.0034	0.009
twi/24	M4934_1.02	cisbp_motifs	0.0025	0.0051	0.0045
twi/24	M1854_1.02	cisbp_motifs	0.0065	0.0086	0.0105
twi/24	M6277_1.02	cisbp_motifs	6.00E-04	0.0017	0.0015
twi/24	M5054_1.02	cisbp_motifs	0.0144	0.0086	0.0286
twi/24	M5018_1.02	cisbp_motifs	0.0027	0.0086	0.0045
twi/24	M4922_1.02	cisbp_motifs	0.0035	0.0017	0.006
twi/24	M4811_1.02	cisbp_motifs	0.006	0.0052	0.0075
twi/24	M6537_1.02	cisbp_motifs	0.0033	0.0103	0.009
twi/24	M4912_1.02	cisbp_motifs	0.0027	0.0034	0.003
twi/24	M4526_1.02	cisbp_motifs	0.0019	0.0017	0.003
twi/24	M4767_1.02	cisbp_motifs	0.0048	0.0068	0.0045
twi/24	M4803_1.02	cisbp_motifs	0.0017	0	0.003
twi/24	M4913_1.02	cisbp_motifs	0.0019	0.0017	0
twi/24	M4892_1.02	cisbp_motifs	0.004	0.0017	0.006
twi/24	M4823_1.02	cisbp_motifs	0.0033	0.0017	0.0045
twi/24	M4735_1.02	cisbp_motifs	0.0023	0.0052	0.0271
twi/24	M4750_1.02	cisbp_motifs	0.0036	0.0069	0.0135
twi/24	M5189_1.02	cisbp_motifs	0.0025	0.0034	0.009
twi/24	M5022_1.02	cisbp_motifs	0.0023	0	0.0045
twi/24	M4952_1.02	cisbp_motifs	0.0021	0	0.0105
twi/24	M5348_1.02	cisbp_motifs	0.004	0.0069	0
twi/24	M5103_1.02	cisbp_motifs	0.0038	0.0017	0.003
twi/24	M4939_1.02	cisbp_motifs	0.006	0.0086	0.0015
twi/24	M5213_1.02	cisbp_motifs	0.0013	0.0052	0.003
twi/24	M5035_1.02	cisbp_motifs	0.0035	0.0069	0.006
twi/24	M0580_1.02	cisbp_motifs	0.0035	0.0017	0.0075
twi/24	M4813_1.02	cisbp_motifs	0.0025	0.0069	0.009
twi/24	M4899_1.02	cisbp_motifs	0.004	0.0086	0.009
twi/24	M5217_1.02	cisbp_motifs	0.0017	0.0069	0
twi/24	M5207_1.02	cisbp_motifs	0.0042	0.0034	0.0015
twi/24	M5128_1.02	cisbp_motifs	0.001	0.0017	0.015
twi/24	M5182_1.02	cisbp_motifs	0.0019	0.0086	0.0045
twi/24	M5051_1.02	cisbp_motifs	0.0021	0.0017	0
twi/24	M5050_1.02	cisbp_motifs	0.0021	0.0017	0
twi/24	M4911_1.02	cisbp_motifs	0.0019	0.0069	0.0195
twi/24	M1471_1.02	cisbp_motifs	0.0012	0.0017	0.003
twi/24	M5097_1.02	cisbp_motifs	0.005	0.0017	0.0076
twi/24	M6410_1.02	cisbp_motifs	0.001	0.0068	0.006
twi/24	M5059_1.02	cisbp_motifs	0.0025	0.0051	0.0015
twi/24	M4966_1.02	cisbp_motifs	0.0029	0.012	0.0196
twi/24	M4937_1.02	cisbp_motifs	0.0017	0.0017	0
twi/24	M4930_1.02	cisbp_motifs	0.0023	0	0.0015
twi/24	M4929_1.02	cisbp_motifs	0.0023	0	0.0015
twi/24	M4840_1.02	cisbp_motifs	0.0042	0.0051	0.0045
twi/24	M1837_1.02	cisbp_motifs	0.0036	0.0051	0.0091
twi/24	M1095_1.02	cisbp_motifs	0.0027	0.0034	0.0045
twi/24	M5020_1.02	cisbp_motifs	0.0019	0	0.003
twi/24	M5011_1.02	cisbp_motifs	0.0042	0.0051	0.0121
twi/24	M2247_1.02	cisbp_motifs	0.0054	0.0069	0.0075
twi/24	M1850_1.02	cisbp_motifs	0.0021	0.0051	0.0105
twi/24	M5029_1.02	cisbp_motifs	0.0023	0.0017	0.0045
twi/24	M5099_1.02	cisbp_motifs	0.0077	0.0069	0.0045
twi/24	M6186_1.02	cisbp_motifs	0.0013	0.0035	0.0015
twi/24	M4673_1.02	cisbp_motifs	0.0046	0.0051	0.009
twi/24	M5190_1.02	cisbp_motifs	0.0036	0.0103	0.0151
twi/24	M5177_1.02	cisbp_motifs	0.0036	0.0103	0.0151
twi/24	M2249_1.02	cisbp_motifs	0.0052	0	0.0075
twi/24	M1628_1.02	cisbp_motifs	0.0021	0.0017	0.0015
twi/24	M4924_1.02	cisbp_motifs	0.0027	0.0068	0.0045
twi/24	M5121_1.02	cisbp_motifs	0.0042	0.0017	0.003
twi/24	M5025_1.02	cisbp_motifs	0.0027	0	0.003
twi/24	M4969_1.02	cisbp_motifs	0.0021	0.0103	0.006
twi/24	M4949_1.02	cisbp_motifs	0.0021	0	0.003
twi/24	M4677_1.02	cisbp_motifs	0.0038	0.0052	0.009
twi/24	M0302_1.02	cisbp_motifs	0.0019	0	0.0015
twi/24	M6374_1.02	cisbp_motifs	0.0019	0	0.009
twi/24	M4919_1.02	cisbp_motifs	0.0015	0.0017	0.009
twi/24	M4918_1.02	cisbp_motifs	0.0015	0.0017	0.009
twi/24	M1524_1.02	cisbp_motifs	0.0023	0.0034	0.003
twi/24	M1100_1.02	cisbp_motifs	0.0019	0.0051	0.003
twi/24	M5272_1.02	cisbp_motifs	0.0012	0.0034	0.0015
twi/24	M4896_1.02	cisbp_motifs	0.0012	0.0034	0.0045
twi/24	M4895_1.02	cisbp_motifs	0.0012	0.0034	0.0045
twi/24	M4747_1.02	cisbp_motifs	0.001	0	0.0015
twi/24	M4985_1.02	cisbp_motifs	0.0033	0.0052	0.006
twi/24	M5247_1.02	cisbp_motifs	0.0088	0.0103	0.009
twi/24	M4669_1.02	cisbp_motifs	0.0017	0.0017	0.0015
twi/24	M2387_1.02	cisbp_motifs	0.0019	0.0052	0.0045
twi/24	M5234_1.02	cisbp_motifs	0.0012	0	0.0015
twi/24	M5152_1.02	cisbp_motifs	0.0035	0.0017	0.0045
twi/24	M4988_1.02	cisbp_motifs	0.0033	0.0051	0.003
twi/24	M4971_1.02	cisbp_motifs	0.0035	0.0086	0.0211
twi/24	M4670_1.02	cisbp_motifs	0.0021	0.0052	0.003
twi/24	M1529_1.02	cisbp_motifs	0.0023	0.0052	0.0015
twi/24	M1092_1.02	cisbp_motifs	0.0017	0	0.0015
twi/24	M1089_1.02	cisbp_motifs	0.0021	0.0017	0.003
twi/24	M5263_1.02	cisbp_motifs	0.001	0.0034	0.0075
twi/24	M4794_1.02	cisbp_motifs	0.0031	0.0051	0.0181
twi/24	M5227_1.02	cisbp_motifs	0.0029	0.0051	0.0136
twi/24	M5187_1.02	cisbp_motifs	0.001	0.0034	0.0076
twi/24	M4914_1.02	cisbp_motifs	0.0017	0	0.003
twi/24	M4906_1.02	cisbp_motifs	0.0017	0.0069	0.027
twi/24	M1631_1.02	cisbp_motifs	0.0012	0.0017	0
twi/24	M1094_1.02	cisbp_motifs	0.0015	0.0017	0.0015
twi/24	M6238_1.02	cisbp_motifs	0.0088	0.0068	0.0121
twi/24	M5283_1.02	cisbp_motifs	0.0036	0.0017	0.0045
twi/24	M4869_1.02	cisbp_motifs	0.0013	0.0034	0.0015
twi/24	M4800_1.02	cisbp_motifs	0.0031	0	0.003
twi/24	M0723_1.02	cisbp_motifs	0.0031	0.0034	0.006
twi/24	M2251_1.02	cisbp_motifs	8.00E-04	0	0
twi/24	M1097_1.02	cisbp_motifs	0.001	0	0.0015
twi/24	M0319_1.02	cisbp_motifs	4.00E-04	0	0.0015
twi/24	M5047_1.02	cisbp_motifs	0.0106	0.0154	0.0211
twi/24	M5009_1.02	cisbp_motifs	0.004	0.0034	0.003
twi/24	M0576_1.02	cisbp_motifs	0.0019	0.0017	0.0045
twi/24	M4765_1.02	cisbp_motifs	0.0015	0.0051	0.0015
twi/24	M5060_1.02	cisbp_motifs	0.0025	0	0.003
twi/24	M4926_1.02	cisbp_motifs	0.0031	0.0034	0.0045
twi/24	M4882_1.02	cisbp_motifs	0.0017	0.0017	0
twi/24	M1849_1.02	cisbp_motifs	0.0081	0.0068	0.0121
twi/24	M1519_1.02	cisbp_motifs	0.0044	0.0086	0.0105
twi/24	M5256_1.02	cisbp_motifs	0.0017	0.0051	0.0287
twi/24	M5159_1.02	cisbp_motifs	0.0027	0	0.0045
twi/24	M5024_1.02	cisbp_motifs	0.0015	0	0.003
twi/24	M5019_1.02	cisbp_motifs	0.0017	0	0.003
twi/24	M4996_1.02	cisbp_motifs	0.004	0.0069	0.0195
twi/24	M4954_1.02	cisbp_motifs	0.0025	0	0.0015
twi/24	M5224_1.02	cisbp_motifs	0.0021	0.0017	0.0045
twi/24	M5142_1.02	cisbp_motifs	0.0035	0.0034	0.003
twi/24	M5704_1.02	cisbp_motifs	6.00E-04	0	0.0015
twi/24	M4708_1.02	cisbp_motifs	0.005	0.0034	0.006
twi/24	M0740_1.02	cisbp_motifs	0.0048	0.0034	0.006
twi/24	M0737_1.02	cisbp_motifs	0.0058	0.0051	0.0075
twi/24	M0641_1.02	cisbp_motifs	0.0015	0.0051	0.003
twi/24	M1088_1.02	cisbp_motifs	0.0012	0.0034	0.0015
twi/24	M5004_1.02	cisbp_motifs	6.00E-04	0.0017	0.0015
twi/24	M4676_1.02	cisbp_motifs	0.0054	0.0017	0.009
twi/24	M1102_1.02	cisbp_motifs	0.0015	0.0017	0.003
twi/24	M1093_1.02	cisbp_motifs	0.0013	0.0017	0.0015
twi/24	M1091_1.02	cisbp_motifs	0.0019	0	0
twi/24	M5233_1.02	cisbp_motifs	8.00E-04	0	0.0015
twi/24	M5157_1.02	cisbp_motifs	0.0015	0	0.003
twi/24	M5116_1.02	cisbp_motifs	0.0027	0.0086	0.006
twi/24	M4953_1.02	cisbp_motifs	0.0019	0.0017	0.009
twi/24	M4831_1.02	cisbp_motifs	0.0025	0.0069	0.0045
twi/24	M4817_1.02	cisbp_motifs	0.0017	0.0086	0.0045
twi/24	M4739_1.02	cisbp_motifs	0.0025	0.0017	0.006
twi/24	M4757_1.02	cisbp_motifs	0.006	0.0034	0.006
twi/24	M6394_1.02	cisbp_motifs	0.0025	0	0.0045
twi/24	M5280_1.02	cisbp_motifs	0.0017	0	0.003
twi/24	M4921_1.02	cisbp_motifs	0.0023	0	0.003
twi/24	M4808_1.02	cisbp_motifs	0.0033	0.0034	0.0151
twi/24	M2060_1.02	cisbp_motifs	0.0029	0.0051	0.0045
twi/24	M1599_1.02	cisbp_motifs	0.0025	0.0017	0.003
twi/24	M1099_1.02	cisbp_motifs	0.0013	0	0.003
twi/24	M5173_1.02	cisbp_motifs	0.0027	0.0017	0.0076
twi/24	M5172_1.02	cisbp_motifs	0.0027	0.0017	0.0076
twi/24	M5052_1.02	cisbp_motifs	0.0013	0.0052	0.0015
twi/24	M4902_1.02	cisbp_motifs	0.001	0.0017	0
twi/24	M5023_1.02	cisbp_motifs	8.00E-04	0.0034	0
twi/24	M4783_1.02	cisbp_motifs	0.0019	0.0017	0.003
twi/24	M4770_1.02	cisbp_motifs	0.0031	0.0034	0.006
twi/24	M4728_1.02	cisbp_motifs	0.0029	0	0.0045
twi/24	M5180_1.02	cisbp_motifs	0.0023	0	0.0015
twi/24	M5167_1.02	cisbp_motifs	0.005	0.0034	0.0045
twi/24	M4923_1.02	cisbp_motifs	0.0015	0.0034	0.0015
twi/24	M4830_1.02	cisbp_motifs	0.0033	0.0034	0.0015
twi/24	M2263_1.02	cisbp_motifs	0.0031	0	0
twi/24	M1090_1.02	cisbp_motifs	0.0015	0.0017	0
twi/24	M4973_1.02	cisbp_motifs	0.004	0.0034	0.006
twi/24	M4859_1.02	cisbp_motifs	0.0025	0.0034	0.0075
twi/24	M4901_1.02	cisbp_motifs	0.0021	0.0017	0.0015
twi/24	M4883_1.02	cisbp_motifs	0.0013	0.0034	0.003
twi/24	M6237_1.02	cisbp_motifs	0.0073	0.0052	0.015
twi/24	M5043_1.02	cisbp_motifs	0.0017	0.0017	0
twi/24	M1101_1.02	cisbp_motifs	0.0017	0	0
twi/24	M4857_1.02	cisbp_motifs	0.0012	0	0.003
twi/24	M1946_1.02	cisbp_motifs	0.0012	0	0
twi/24	M4829_1.02	cisbp_motifs	0.0021	0.0017	0.0015
twi/24	M0817_1.02	cisbp_motifs	0.0017	0.0017	0.003
twi/24	M0713_1.02	cisbp_motifs	0.0012	0	0.0015
twi/24	M5265_1.02	cisbp_motifs	0.0017	0.0017	0.0105
twi/24	M5179_1.02	cisbp_motifs	0.0017	0.0068	0.0076
twi/24	M5113_1.02	cisbp_motifs	0.0015	0.0051	0.0015
twi/24	M5104_1.02	cisbp_motifs	0.0021	0	0.0045
twi/24	M4951_1.02	cisbp_motifs	0.001	0.0017	0.0045
twi/24	M4894_1.02	cisbp_motifs	0.0012	0	0.0015
twi/24	M4893_1.02	cisbp_motifs	0.0012	0	0.0015
twi/24	M4769_1.02	cisbp_motifs	0.0015	0	0.0045
twi/24	M4725_1.02	cisbp_motifs	0.0025	0.0086	0.0045
twi/24	M4724_1.02	cisbp_motifs	0.0025	0.0086	0.0045
twi/24	M1469_1.02	cisbp_motifs	0.0015	0.0034	0.003
twi/24	M5241_1.02	cisbp_motifs	0.0017	0.0034	0.003
twi/24	M5108_1.02	cisbp_motifs	0.0012	0	0
twi/24	M5107_1.02	cisbp_motifs	0.0012	0	0
twi/24	M4933_1.02	cisbp_motifs	0.0015	0	0.0015
twi/24	M4891_1.02	cisbp_motifs	0.0017	0	0.0015
twi/24	M1623_1.02	cisbp_motifs	0.0012	0.0034	0
twi/24	M1470_1.02	cisbp_motifs	0.0013	0	0.0045
twi/24	M1098_1.02	cisbp_motifs	8.00E-04	0	0
twi/24	M1096_1.02	cisbp_motifs	0.0012	0	0.003
twi/24	M5036_1.02	cisbp_motifs	0.001	0	0.003
twi/24	M4947_1.02	cisbp_motifs	0.0019	0	0.0045
twi/24	M4787_1.02	cisbp_motifs	0.0038	0.012	0.0105
twi/24	M0135_1.02	cisbp_motifs	0.0052	0.0069	0.012
twi/24	M5194_1.02	cisbp_motifs	0.0035	0.0051	0.003
twi/24	M4982_1.02	cisbp_motifs	0.0021	0	0
twi/24	M4931_1.02	cisbp_motifs	0.0015	0.0017	0.0015
twi/24	M4878_1.02	cisbp_motifs	6.00E-04	0.0017	0.0015
twi/24	M4847_1.02	cisbp_motifs	6.00E-04	0.0034	0.003
twi/24	M4826_1.02	cisbp_motifs	0.0013	0	0.0045
twi/24	M4730_1.02	cisbp_motifs	0.004	0.0034	0.009
twi/24	M1960_1.02	cisbp_motifs	0.0035	0	0.0015
twi/24	M1104_1.02	cisbp_motifs	0.0021	0.0051	0.0015
twi/24	M0967_1.02	cisbp_motifs	0.0013	0.0017	0.0015
twi/24	M5144_1.02	cisbp_motifs	0.0021	0	0
twi/24	M4843_1.02	cisbp_motifs	0.0031	0.0017	0
twi/24	M5252_1.02	cisbp_motifs	0.0021	0.0017	0.0015
twi/24	M5208_1.02	cisbp_motifs	0.0013	0	0
twi/24	M5199_1.02	cisbp_motifs	0.0021	0.0034	0.003
twi/24	M5174_1.02	cisbp_motifs	0.0023	0.0017	0.0015
twi/24	M4977_1.02	cisbp_motifs	0.0017	0	0
twi/24	M4964_1.02	cisbp_motifs	0.0033	0.0034	0.0045
twi/24	M4872_1.02	cisbp_motifs	0.0038	0	0.006
twi/24	M4820_1.02	cisbp_motifs	0.001	0.0034	0
twi/24	M4788_1.02	cisbp_motifs	0.0021	0.0017	0.003
twi/24	M4743_1.02	cisbp_motifs	0.0029	0.0052	0.003
twi/24	M4720_1.02	cisbp_motifs	0.0019	0.0051	0
twi/24	M1869_1.02	cisbp_motifs	0.001	0	0.0015
twi/24	M0736_1.02	cisbp_motifs	0.004	0.0034	0.0015
twi/24	M0111_1.02	cisbp_motifs	0.0017	0.0034	0.0015
twi/24	M5273_1.02	cisbp_motifs	0.0013	0.0051	0.0015
twi/24	M5101_1.02	cisbp_motifs	0.0015	0	0.003
twi/24	M5081_1.02	cisbp_motifs	0.0013	0	0.0015
twi/24	M5064_1.02	cisbp_motifs	0.0013	0.0051	0.0015
twi/24	M4745_1.02	cisbp_motifs	0.0013	0.0051	0.0015
twi/24	M1858_1.02	cisbp_motifs	0.0023	0	0.0045
twi/24	M4675_1.02	cisbp_motifs	6.00E-04	0	0
twi/24	M5196_1.02	cisbp_motifs	8.00E-04	0.0017	0.003
twi/24	M4863_1.02	cisbp_motifs	0.0019	0	0.0015
twi/24	M2006_1.02	cisbp_motifs	0.004	0.0034	0.0015
twi/24	M1242_1.02	cisbp_motifs	0.0021	0	0
twi/24	M1223_1.02	cisbp_motifs	0.0015	0	0.0015
twi/24	M1105_1.02	cisbp_motifs	2.00E-04	0.0017	0
twi/24	M1103_1.02	cisbp_motifs	0.0017	0	0
twi/24	M5109_1.02	cisbp_motifs	0.0048	0.0034	0.006
twi/24	M2037_1.02	cisbp_motifs	6.00E-04	0	0.0015
twi/24	M0596_1.02	cisbp_motifs	0.0023	0.0052	0.0015
twi/24	M2031_1.02	cisbp_motifs	0.0015	0.0051	0.0015
twi/24	M5147_1.02	cisbp_motifs	8.00E-04	0	0.0015
twi/24	M5111_1.02	cisbp_motifs	0.0013	0	0
twi/24	M4948_1.02	cisbp_motifs	0.0013	0.0051	0.0015
twi/24	M2002_1.02	cisbp_motifs	0.001	0	0.0015
twi/24	M5164_1.02	cisbp_motifs	0.004	0.0034	0.0015
twi/24	M5137_1.02	cisbp_motifs	0.0035	0.0034	0.003
twi/24	M5007_1.02	cisbp_motifs	0.004	0.0034	0.0015
twi/24	M4997_1.02	cisbp_motifs	0.0104	0.0052	0.012
twi/24	M4790_1.02	cisbp_motifs	0.0042	0.0034	0.0045
twi/24	M1992_1.02	cisbp_motifs	0.004	0.0051	0.0015
twi/24	M1918_1.02	cisbp_motifs	0.0038	0.0034	0.0045
twi/24	M1106_1.02	cisbp_motifs	8.00E-04	0.0034	0
twi/24	M5221_1.02	cisbp_motifs	0.001	0	0.0015
twi/24	M5034_1.02	cisbp_motifs	0.001	0	0.0015
twi/24	M4809_1.02	cisbp_motifs	0.0015	0.0017	0
twi/24	M5119_1.02	cisbp_motifs	0.0013	0	0
twi/24	M4983_1.02	cisbp_motifs	0.0019	0	0.0015
twi/24	M2046_1.02	cisbp_motifs	8.00E-04	0.0017	0.0015
twi/24	M2029_1.02	cisbp_motifs	0.0013	0.0017	0.0015
ctcf/68	M5065_1.02	cisbp_motifs	0.0169	0.008	0.0585
ctcf/68	M4876_1.02	cisbp_motifs	0.0138	0.0099	0.0441
ctcf/68	M2328_1.02	cisbp_motifs	0.0056	0.0138	0.0383
ctcf/68	M4898_1.02	cisbp_motifs	0.0128	0.0099	0.0413
ctcf/68	M2325_1.02	cisbp_motifs	0.0092	0.0179	0.0204
ctcf/68	M5215_1.02	cisbp_motifs	0.0154	0.004	0.0441
ctcf/68	M4870_1.02	cisbp_motifs	0.0072	0.0099	0.0147
ctcf/68	M5211_1.02	cisbp_motifs	0.0348	0.0238	0.0587
ctcf/68	M5148_1.02	cisbp_motifs	0.0046	0.002	0.0088
ctcf/68	M2327_1.02	cisbp_motifs	0.0036	0.004	0.0118
ctcf/68	M4880_1.02	cisbp_motifs	0.0041	0	0.0175
ctcf/68	M1912_1.02	cisbp_motifs	0.0061	0.006	0.0088
ctcf/68	M5006_1.02	cisbp_motifs	0.0036	0.002	0.0118
ctcf/68	M6235_1.02	cisbp_motifs	0.0026	0.006	0.0116
ctcf/68	M4879_1.02	cisbp_motifs	0.001	0.0079	0.0088
ctcf/68	M5003_1.02	cisbp_motifs	0.0031	0.004	0.0088
ctcf/68	M5048_1.02	cisbp_motifs	0.0271	0.0317	0.0441
ctcf/68	M6459_1.02	cisbp_motifs	0.0077	0.004	0.0235
ctcf/68	M4860_1.02	cisbp_motifs	0.0061	0.002	0.0205
ctcf/68	M5168_1.02	cisbp_motifs	0.0312	0.0179	0.0352
ctcf/68	M5037_1.02	cisbp_motifs	0.0046	0	0.0089
ctcf/68	M4672_1.02	cisbp_motifs	0.0036	0.0178	0.0294
ctcf/68	M5219_1.02	cisbp_motifs	0.0041	0.008	0.0234
ctcf/68	M4850_1.02	cisbp_motifs	0.0061	0.0139	0.0235
ctcf/68	M4889_1.02	cisbp_motifs	0.0046	0.006	0.0087
ctcf/68	M5102_1.02	cisbp_motifs	0.0072	0.004	0.0205
ctcf/68	M6501_1.02	cisbp_motifs	0.0092	0.0139	0.0264
ctcf/68	M4885_1.02	cisbp_motifs	0.0031	0	0.0146
ctcf/68	M2259_1.02	cisbp_motifs	0.0056	0.002	0.0263
ctcf/68	M4842_1.02	cisbp_motifs	0.002	0.006	0.0233
ctcf/68	M1890_1.02	cisbp_motifs	0.0056	0.004	0.0147
ctcf/68	M4722_1.02	cisbp_motifs	0.0036	0.0079	0.0029
ctcf/68	M4866_1.02	cisbp_motifs	0.0036	0.0059	0.0148
ctcf/68	M4865_1.02	cisbp_motifs	0.0051	0.0119	0.0206
ctcf/68	M5660_1.02	cisbp_motifs	0.0041	0.004	0.0087
ctcf/68	M4900_1.02	cisbp_motifs	0.0015	0.0039	0.003
ctcf/68	M4867_1.02	cisbp_motifs	0.002	0.0059	0.0118
ctcf/68	M5035_1.02	cisbp_motifs	0.0026	0.0099	0.0205
ctcf/68	M4873_1.02	cisbp_motifs	0.0046	0.004	0.0117
ctcf/68	M5209_1.02	cisbp_motifs	0.0051	0.0099	0.0117
ctcf/68	M4526_1.02	cisbp_motifs	0.0046	0	0.0118
ctcf/68	M4802_1.02	cisbp_motifs	0.002	0.004	0.0117
ctcf/68	M4897_1.02	cisbp_motifs	0.002	0.01	0.0146
ctcf/68	M4927_1.02	cisbp_motifs	0.0041	0.006	0.0059
ctcf/68	M5244_1.02	cisbp_motifs	0.0051	0.0059	0.0177
ctcf/68	M4748_1.02	cisbp_motifs	0.0031	0.004	0.0029
ctcf/68	M4837_1.02	cisbp_motifs	0.0031	0.006	0.0205
ctcf/68	M4934_1.02	cisbp_motifs	0.0015	0.006	0.0117
ctcf/68	M5039_1.02	cisbp_motifs	0.0026	0.002	0.0088
ctcf/68	M1854_1.02	cisbp_motifs	0.0026	0	0.0147
ctcf/68	M6166_1.02	cisbp_motifs	0.0036	0.0099	0.0059
ctcf/68	M6277_1.02	cisbp_motifs	0.001	0	0
ctcf/68	M4674_1.02	cisbp_motifs	0.0026	0.004	0.0029
ctcf/68	M5054_1.02	cisbp_motifs	0.0133	0.004	0.038
ctcf/68	M5018_1.02	cisbp_motifs	0.0031	0.004	0.0324
ctcf/68	M4922_1.02	cisbp_motifs	0.0015	0.006	0.0029
ctcf/68	M4811_1.02	cisbp_motifs	0.0031	0.004	0.0147
ctcf/68	M4912_1.02	cisbp_motifs	0.0026	0.0059	0.0118
ctcf/68	M5158_1.02	cisbp_motifs	0.0041	0.0059	0.0147
ctcf/68	M5079_1.02	cisbp_motifs	0.0067	0.0059	0.0385
ctcf/68	M4767_1.02	cisbp_motifs	0.0026	0.0139	0.0206
ctcf/68	M4803_1.02	cisbp_motifs	0.0031	0.004	0.0088
ctcf/68	M5030_1.02	cisbp_motifs	0.0041	0	0.0088
ctcf/68	M4913_1.02	cisbp_motifs	0.0015	0.004	0.0088
ctcf/68	M4633_1.02	cisbp_motifs	0	0.004	0.0088
ctcf/68	M5189_1.02	cisbp_motifs	0.0031	0.004	0.0029
ctcf/68	M4952_1.02	cisbp_motifs	0.0031	0.004	0.0088
ctcf/68	M4892_1.02	cisbp_motifs	0.0026	0.004	0.0059
ctcf/68	M4750_1.02	cisbp_motifs	0.0031	0.0099	0.0264
ctcf/68	M4735_1.02	cisbp_motifs	0.0056	0.006	0.0408
ctcf/68	M5022_1.02	cisbp_motifs	0.0015	0.0059	0.0059
ctcf/68	M5203_1.02	cisbp_motifs	0.0036	0.006	0.0117
ctcf/68	M5222_1.02	cisbp_motifs	0.0026	0.006	0.0146
ctcf/68	M5103_1.02	cisbp_motifs	0.0026	0.0059	0.0178
ctcf/68	M4939_1.02	cisbp_motifs	0.0056	0.0059	0.0265
ctcf/68	M0580_1.02	cisbp_motifs	0.0015	0.002	0.0088
ctcf/68	M5151_1.02	cisbp_motifs	0.0031	0	0.0236
ctcf/68	M5182_1.02	cisbp_motifs	0.002	0.0059	0.0266
ctcf/68	M5217_1.02	cisbp_motifs	0.0015	0.002	0.0118
ctcf/68	M5207_1.02	cisbp_motifs	0.0026	0.0079	0.0176
ctcf/68	M5128_1.02	cisbp_motifs	0.0036	0.01	0.0145
ctcf/68	M4899_1.02	cisbp_motifs	0.0031	0.002	0.0029
ctcf/68	M5348_1.02	cisbp_motifs	0.0041	0.0079	0.0117
ctcf/68	M5186_1.02	cisbp_motifs	0.0031	0.006	0.0088
ctcf/68	M6537_1.02	cisbp_motifs	0.0015	0.004	0.0088
ctcf/68	M5097_1.02	cisbp_motifs	0.0046	0.0059	0.0118
ctcf/68	M5059_1.02	cisbp_motifs	0.001	0.004	0.0087
ctcf/68	M4937_1.02	cisbp_motifs	0.0015	0.002	0.0059
ctcf/68	M1095_1.02	cisbp_motifs	0.001	0.0059	0.0176
ctcf/68	M6410_1.02	cisbp_motifs	0.0031	0.004	0.0117
ctcf/68	M5121_1.02	cisbp_motifs	0.0046	0	0.0058
ctcf/68	M4966_1.02	cisbp_motifs	0.0036	0.004	0.0059
ctcf/68	M4930_1.02	cisbp_motifs	0.0015	0.002	0.0029
ctcf/68	M4929_1.02	cisbp_motifs	0.0015	0.002	0.0029
ctcf/68	M4840_1.02	cisbp_motifs	0.0036	0.006	0.0292
ctcf/68	M1837_1.02	cisbp_motifs	0.002	0.008	0.0233
ctcf/68	M4824_1.02	cisbp_motifs	0.0061	0.006	0.0292
ctcf/68	M4823_1.02	cisbp_motifs	0.002	0.002	0.0178
ctcf/68	M5029_1.02	cisbp_motifs	0.0015	0.006	0
ctcf/68	M5020_1.02	cisbp_motifs	0.001	0.006	0
ctcf/68	M5011_1.02	cisbp_motifs	0.0015	0.006	0.0175
ctcf/68	M2247_1.02	cisbp_motifs	0.0056	0.0099	0.0264
ctcf/68	M1850_1.02	cisbp_motifs	0.0031	0.002	0.0117
ctcf/68	M5099_1.02	cisbp_motifs	0.0082	0.0099	0.0235
ctcf/68	M4813_1.02	cisbp_motifs	0.0031	0.004	0.0029
ctcf/68	M6186_1.02	cisbp_motifs	0.0026	0.008	0.0058
ctcf/68	M5190_1.02	cisbp_motifs	0.0041	0.002	0.0059
ctcf/68	M5177_1.02	cisbp_motifs	0.0041	0.002	0.0059
ctcf/68	M4673_1.02	cisbp_motifs	0.0041	0.012	0.0204
ctcf/68	M2249_1.02	cisbp_motifs	0.0031	0.0059	0.0088
ctcf/68	M5213_1.02	cisbp_motifs	0.0061	0.002	0.0116
ctcf/68	M4911_1.02	cisbp_motifs	0.0031	0.0059	0.0147
ctcf/68	M5051_1.02	cisbp_motifs	0.001	0	0.0059
ctcf/68	M5050_1.02	cisbp_motifs	0.001	0	0.0059
ctcf/68	M1628_1.02	cisbp_motifs	0.002	0.002	0.0147
ctcf/68	M4924_1.02	cisbp_motifs	0.0041	0.0079	0.0118
ctcf/68	M4919_1.02	cisbp_motifs	0.0041	0.0059	0.0088
ctcf/68	M4918_1.02	cisbp_motifs	0.0041	0.0059	0.0088
ctcf/68	M6374_1.02	cisbp_motifs	0.001	0.004	0.0029
ctcf/68	M5025_1.02	cisbp_motifs	0.002	0.002	0.0058
ctcf/68	M4969_1.02	cisbp_motifs	0.0056	0.006	0.0175
ctcf/68	M4949_1.02	cisbp_motifs	0.0015	0.004	0
ctcf/68	M4677_1.02	cisbp_motifs	0.002	0.002	0.0147
ctcf/68	M1524_1.02	cisbp_motifs	0.0056	0.002	0.0088
ctcf/68	M1100_1.02	cisbp_motifs	0.001	0	0.0058
ctcf/68	M0302_1.02	cisbp_motifs	0.001	0.0079	0.0088
ctcf/68	M5272_1.02	cisbp_motifs	5.00E-04	0.004	0.0029
ctcf/68	M4896_1.02	cisbp_motifs	0.0031	0	0.0147
ctcf/68	M4895_1.02	cisbp_motifs	0.0031	0	0.0147
ctcf/68	M4747_1.02	cisbp_motifs	0.0015	0.002	0.0029
ctcf/68	M4819_1.02	cisbp_motifs	0.0056	0.004	0.0118
ctcf/68	M4985_1.02	cisbp_motifs	0.0026	0.0119	0.0088
ctcf/68	M1471_1.02	cisbp_motifs	0.0041	0.004	0.0087
ctcf/68	M5263_1.02	cisbp_motifs	0.0031	0	0.0088
ctcf/68	M5247_1.02	cisbp_motifs	0.0051	0.0079	0.0206
ctcf/68	M4971_1.02	cisbp_motifs	0.0046	0.0099	0.0029
ctcf/68	M4794_1.02	cisbp_motifs	0.0041	0.0039	0.0089
ctcf/68	M4670_1.02	cisbp_motifs	0.0046	0.016	0.0988
ctcf/68	M2387_1.02	cisbp_motifs	0.0015	0.0039	0.0119
ctcf/68	M1092_1.02	cisbp_motifs	0.0031	0	0.0058
ctcf/68	M1089_1.02	cisbp_motifs	0.0015	0.002	0.0029
ctcf/68	M5234_1.02	cisbp_motifs	0	0.006	0.0058
ctcf/68	M5152_1.02	cisbp_motifs	0.0072	0.006	0.0468
ctcf/68	M4988_1.02	cisbp_motifs	0.0036	0.002	0.0029
ctcf/68	M4669_1.02	cisbp_motifs	0.001	0.002	0.0029
ctcf/68	M1529_1.02	cisbp_motifs	0.0046	0.002	0.0118
ctcf/68	M5187_1.02	cisbp_motifs	0.0015	0.006	0.0147
ctcf/68	M4914_1.02	cisbp_motifs	0.0015	0.004	0.0176
ctcf/68	M4906_1.02	cisbp_motifs	0.0015	0.004	0.0029
ctcf/68	M1631_1.02	cisbp_motifs	5.00E-04	0.004	0.0147
ctcf/68	M5227_1.02	cisbp_motifs	0.0036	0.008	0.0058
ctcf/68	M1094_1.02	cisbp_motifs	5.00E-04	0.002	0.0088
ctcf/68	M5185_1.02	cisbp_motifs	0.0031	0.006	0.0029
ctcf/68	M6238_1.02	cisbp_motifs	0.0036	0.0198	0.0176
ctcf/68	M5283_1.02	cisbp_motifs	0.0036	0	0.0058
ctcf/68	M4869_1.02	cisbp_motifs	0.002	0.006	0.0029
ctcf/68	M4800_1.02	cisbp_motifs	0.002	0.002	0.0029
ctcf/68	M2251_1.02	cisbp_motifs	0.0015	0.002	0
ctcf/68	M0723_1.02	cisbp_motifs	0.0036	0	0.0118
ctcf/68	M0319_1.02	cisbp_motifs	0	0.004	0.0029
ctcf/68	M1097_1.02	cisbp_motifs	0.001	0	0.003
ctcf/68	M5047_1.02	cisbp_motifs	0.0123	0.0217	0.0501
ctcf/68	M5009_1.02	cisbp_motifs	0.0026	0.002	0.0058
ctcf/68	M0576_1.02	cisbp_motifs	0.002	0	0.0147
ctcf/68	M5060_1.02	cisbp_motifs	5.00E-04	0.002	0.0029
ctcf/68	M4926_1.02	cisbp_motifs	0.0026	0.004	0.0117
ctcf/68	M4882_1.02	cisbp_motifs	5.00E-04	0.002	0.0058
ctcf/68	M4765_1.02	cisbp_motifs	0.0015	0.0079	0.0059
ctcf/68	M1849_1.02	cisbp_motifs	0.0087	0.004	0.0236
ctcf/68	M1519_1.02	cisbp_motifs	0.0056	0.0059	0
ctcf/68	M5256_1.02	cisbp_motifs	0.0041	0.006	0.0146
ctcf/68	M5224_1.02	cisbp_motifs	0	0.002	0
ctcf/68	M5159_1.02	cisbp_motifs	0.001	0	0.0059
ctcf/68	M5142_1.02	cisbp_motifs	0.0015	0	0.0029
ctcf/68	M5024_1.02	cisbp_motifs	0.001	0.002	0
ctcf/68	M5019_1.02	cisbp_motifs	0.0015	0.002	0.0059
ctcf/68	M4996_1.02	cisbp_motifs	0.0031	0	0.0294
ctcf/68	M4954_1.02	cisbp_motifs	0.001	0.002	0.0029
ctcf/68	M0740_1.02	cisbp_motifs	0.0031	0.002	0.0088
ctcf/68	M0737_1.02	cisbp_motifs	0.0041	0.01	0.0175
ctcf/68	M5704_1.02	cisbp_motifs	0.001	0.002	0.0029
ctcf/68	M0641_1.02	cisbp_motifs	0.0026	0.002	0.0088
ctcf/68	M4708_1.02	cisbp_motifs	0.0051	0.0098	0.0119
ctcf/68	M1088_1.02	cisbp_motifs	0.0015	0.0039	0.0059
ctcf/68	M5233_1.02	cisbp_motifs	5.00E-04	0.002	0
ctcf/68	M5157_1.02	cisbp_motifs	0.0026	0.004	0.0029
ctcf/68	M5116_1.02	cisbp_motifs	0.0051	0.002	0.0353
ctcf/68	M5004_1.02	cisbp_motifs	0.001	0	0.0059
ctcf/68	M4953_1.02	cisbp_motifs	0.0031	0.006	0.0117
ctcf/68	M4831_1.02	cisbp_motifs	0.002	0.002	0.0088
ctcf/68	M4817_1.02	cisbp_motifs	5.00E-04	0.002	0.0146
ctcf/68	M4739_1.02	cisbp_motifs	0.0041	0.0059	0.0148
ctcf/68	M1093_1.02	cisbp_motifs	0.001	0	0
ctcf/68	M1091_1.02	cisbp_motifs	0.001	0.002	0.0117
ctcf/68	M4676_1.02	cisbp_motifs	0.0046	0.0059	0.0059
ctcf/68	M1102_1.02	cisbp_motifs	0.0026	0.002	0.0117
ctcf/68	M4757_1.02	cisbp_motifs	0.0072	0.0099	0.0177
ctcf/68	M6394_1.02	cisbp_motifs	0.0026	0	0.0029
ctcf/68	M5173_1.02	cisbp_motifs	0.0031	0.004	0.0088
ctcf/68	M5172_1.02	cisbp_motifs	0.0031	0.004	0.0088
ctcf/68	M1599_1.02	cisbp_motifs	0.0015	0.006	0.0058
ctcf/68	M1099_1.02	cisbp_motifs	5.00E-04	0	0.0029
ctcf/68	M5280_1.02	cisbp_motifs	5.00E-04	0.002	0.0029
ctcf/68	M5052_1.02	cisbp_motifs	0.002	0.004	0.0175
ctcf/68	M4921_1.02	cisbp_motifs	0.0026	0.006	0.0087
ctcf/68	M4902_1.02	cisbp_motifs	0	0	0
ctcf/68	M4808_1.02	cisbp_motifs	0.002	0.002	0.0175
ctcf/68	M2060_1.02	cisbp_motifs	0.001	0.006	0.0029
ctcf/68	M5023_1.02	cisbp_motifs	0.0031	0.006	0.0029
ctcf/68	M4783_1.02	cisbp_motifs	0.001	0.0039	0.0089
ctcf/68	M4770_1.02	cisbp_motifs	0.0041	0.006	0.0437
ctcf/68	M4728_1.02	cisbp_motifs	0.002	0.002	0.0029
ctcf/68	M5180_1.02	cisbp_motifs	0.0015	0.002	0.0029
ctcf/68	M5167_1.02	cisbp_motifs	0.0067	0.0079	0.0088
ctcf/68	M4973_1.02	cisbp_motifs	0.0026	0.0119	0.0146
ctcf/68	M4923_1.02	cisbp_motifs	0.0026	0.004	0.0147
ctcf/68	M4901_1.02	cisbp_motifs	0.0046	0.002	0.0088
ctcf/68	M4859_1.02	cisbp_motifs	0.002	0.004	0.0059
ctcf/68	M4830_1.02	cisbp_motifs	0.002	0.006	0.0088
ctcf/68	M2263_1.02	cisbp_motifs	0.001	0.002	0.0058
ctcf/68	M1946_1.02	cisbp_motifs	5.00E-04	0.004	0.0088
ctcf/68	M1090_1.02	cisbp_motifs	0.001	0.002	0.003
ctcf/68	M4883_1.02	cisbp_motifs	0.001	0	0.0088
ctcf/68	M5043_1.02	cisbp_motifs	5.00E-04	0.002	0.0059
ctcf/68	M1101_1.02	cisbp_motifs	0.0015	0	0.0059
ctcf/68	M6237_1.02	cisbp_motifs	0.0067	0.0219	0.0058
ctcf/68	M4857_1.02	cisbp_motifs	0.001	0.002	0.0059
ctcf/68	M5265_1.02	cisbp_motifs	5.00E-04	0.002	0.0088
ctcf/68	M5113_1.02	cisbp_motifs	0.0015	0.002	0.0058
ctcf/68	M5104_1.02	cisbp_motifs	0.002	0.002	0
ctcf/68	M4951_1.02	cisbp_motifs	0.002	0.008	0.0058
ctcf/68	M4829_1.02	cisbp_motifs	0.002	0	0.0059
ctcf/68	M1469_1.02	cisbp_motifs	0.002	0	0
ctcf/68	M0817_1.02	cisbp_motifs	0.001	0	0.0059
ctcf/68	M5179_1.02	cisbp_motifs	0.002	0	0.0088
ctcf/68	M4894_1.02	cisbp_motifs	0.0015	0.002	0
ctcf/68	M4893_1.02	cisbp_motifs	0.0015	0.002	0
ctcf/68	M4769_1.02	cisbp_motifs	0.001	0.002	0
ctcf/68	M4725_1.02	cisbp_motifs	0.0026	0.006	0.0116
ctcf/68	M4724_1.02	cisbp_motifs	0.0026	0.006	0.0116
ctcf/68	M0713_1.02	cisbp_motifs	0.002	0.002	0.0088
ctcf/68	M5108_1.02	cisbp_motifs	5.00E-04	0.004	0.0029
ctcf/68	M5107_1.02	cisbp_motifs	5.00E-04	0.004	0.0029
ctcf/68	M4933_1.02	cisbp_motifs	0.0015	0	0
ctcf/68	M4787_1.02	cisbp_motifs	0.002	0.002	0.0029
ctcf/68	M1470_1.02	cisbp_motifs	5.00E-04	0	0.0029
ctcf/68	M5241_1.02	cisbp_motifs	5.00E-04	0.004	0.0029
ctcf/68	M5036_1.02	cisbp_motifs	0.002	0	0
ctcf/68	M4947_1.02	cisbp_motifs	0.0031	0	0.0059
ctcf/68	M4891_1.02	cisbp_motifs	0.0015	0	0.0088
ctcf/68	M1623_1.02	cisbp_motifs	0.0015	0	0.0088
ctcf/68	M1098_1.02	cisbp_motifs	0	0	0
ctcf/68	M1096_1.02	cisbp_motifs	5.00E-04	0	0
ctcf/68	M0135_1.02	cisbp_motifs	0.0046	0.01	0.0203
ctcf/68	M5194_1.02	cisbp_motifs	0.0026	0.0099	0.0205
ctcf/68	M5144_1.02	cisbp_motifs	0.002	0.004	0.0029
ctcf/68	M4982_1.02	cisbp_motifs	0.0015	0.002	0.0058
ctcf/68	M4931_1.02	cisbp_motifs	5.00E-04	0.0059	0
ctcf/68	M4878_1.02	cisbp_motifs	0.001	0.004	0.0029
ctcf/68	M4847_1.02	cisbp_motifs	0	0.004	0.0088
ctcf/68	M4826_1.02	cisbp_motifs	0.001	0	0.0089
ctcf/68	M4730_1.02	cisbp_motifs	0	0.0039	0.0059
ctcf/68	M1960_1.02	cisbp_motifs	0.001	0.002	0.0029
ctcf/68	M1104_1.02	cisbp_motifs	0.0015	0.006	0.0146
ctcf/68	M0967_1.02	cisbp_motifs	0.0031	0.004	0.0058
ctcf/68	M4843_1.02	cisbp_motifs	0.0015	0	0.0117
ctcf/68	M4977_1.02	cisbp_motifs	0	0.002	0.0029
ctcf/68	M4964_1.02	cisbp_motifs	0.0026	0.004	0.0087
ctcf/68	M4872_1.02	cisbp_motifs	0.0031	0.004	0.0059
ctcf/68	M4743_1.02	cisbp_motifs	0.002	0.0039	0.0148
ctcf/68	M1869_1.02	cisbp_motifs	0.0015	0	0.0029
ctcf/68	M5252_1.02	cisbp_motifs	0.0015	0	0.0117
ctcf/68	M5199_1.02	cisbp_motifs	0.002	0	0.0087
ctcf/68	M5174_1.02	cisbp_motifs	5.00E-04	0.002	0.0058
ctcf/68	M4820_1.02	cisbp_motifs	0	0.002	0.0118
ctcf/68	M4788_1.02	cisbp_motifs	5.00E-04	0	0.0087
ctcf/68	M4720_1.02	cisbp_motifs	0.0026	0.006	0.0116
ctcf/68	M0736_1.02	cisbp_motifs	0.0036	0.008	0.0116
ctcf/68	M5208_1.02	cisbp_motifs	5.00E-04	0.004	0.0059
ctcf/68	M0111_1.02	cisbp_motifs	0.002	0.006	0.0029
ctcf/68	M5273_1.02	cisbp_motifs	0.0015	0.002	0.0058
ctcf/68	M5101_1.02	cisbp_motifs	0.001	0.002	0
ctcf/68	M5081_1.02	cisbp_motifs	0.0015	0	0
ctcf/68	M5064_1.02	cisbp_motifs	0.0015	0.002	0.0058
ctcf/68	M4745_1.02	cisbp_motifs	0.0015	0.002	0.0058
ctcf/68	M1858_1.02	cisbp_motifs	0.002	0.002	0.0117
ctcf/68	M4675_1.02	cisbp_motifs	0	0.002	0
ctcf/68	M5196_1.02	cisbp_motifs	0.0026	0.008	0.0117
ctcf/68	M5109_1.02	cisbp_motifs	0.0046	0.006	0.0175
ctcf/68	M4863_1.02	cisbp_motifs	0.0026	0.0079	0.0088
ctcf/68	M2037_1.02	cisbp_motifs	0.0015	0	0
ctcf/68	M2006_1.02	cisbp_motifs	0.0015	0.002	0.0146
ctcf/68	M1242_1.02	cisbp_motifs	5.00E-04	0.002	0
ctcf/68	M1223_1.02	cisbp_motifs	0.0015	0.002	0.0029
ctcf/68	M1105_1.02	cisbp_motifs	0.001	0.004	0.0029
ctcf/68	M1103_1.02	cisbp_motifs	0.0015	0	0
ctcf/68	M0596_1.02	cisbp_motifs	0.002	0.0119	0
ctcf/68	M2031_1.02	cisbp_motifs	0.002	0	0.0059
ctcf/68	M5147_1.02	cisbp_motifs	0.0015	0	0.0029
ctcf/68	M5111_1.02	cisbp_motifs	0.001	0	0.0029
ctcf/68	M4948_1.02	cisbp_motifs	0.0015	0.002	0.0058
ctcf/68	M2002_1.02	cisbp_motifs	0.001	0	0.0088
ctcf/68	M5164_1.02	cisbp_motifs	0.0015	0.002	0.0146
ctcf/68	M5137_1.02	cisbp_motifs	0.002	0.002	0.0146
ctcf/68	M5007_1.02	cisbp_motifs	0.0015	0.002	0.0146
ctcf/68	M4997_1.02	cisbp_motifs	0.0097	0.0139	0.0293
ctcf/68	M4790_1.02	cisbp_motifs	0.0036	0.0139	0.0147
ctcf/68	M1992_1.02	cisbp_motifs	0.002	0.006	0.0146
ctcf/68	M1918_1.02	cisbp_motifs	0.0031	0.002	0.0175
ctcf/68	M1106_1.02	cisbp_motifs	0.0015	0.002	0.0059
ctcf/68	M5221_1.02	cisbp_motifs	5.00E-04	0	0
ctcf/68	M5034_1.02	cisbp_motifs	5.00E-04	0	0
ctcf/68	M4809_1.02	cisbp_motifs	5.00E-04	0.008	0.0029
ctcf/68	M4983_1.02	cisbp_motifs	0.001	0	0.0087
ctcf/68	M2046_1.02	cisbp_motifs	5.00E-04	0.004	0
ctcf/68	M2029_1.02	cisbp_motifs	0.002	0.002	0.0058
ctcf/68	M5119_1.02	cisbp_motifs	0.0015	0	0.0029
bin/68	M2328_1.02	cisbp_motifs	0.0055	0	0.0079
bin/68	M4876_1.02	cisbp_motifs	0.0156	0.0259	0.0157
bin/68	M5065_1.02	cisbp_motifs	0.0182	0.0258	0.0236
bin/68	M4898_1.02	cisbp_motifs	0.015	0.0129	0.0118
bin/68	M5215_1.02	cisbp_motifs	0.0121	0.0129	0.0235
bin/68	M6501_1.02	cisbp_motifs	0.0078	0.0129	0.0078
bin/68	M2325_1.02	cisbp_motifs	0.0072	0.0043	0.0079
bin/68	M5151_1.02	cisbp_motifs	0.0043	0.0043	0
bin/68	M5211_1.02	cisbp_motifs	0.0265	0.0215	0.0276
bin/68	M4885_1.02	cisbp_motifs	0.004	0.0043	0.0039
bin/68	M4870_1.02	cisbp_motifs	0.0089	0.0129	0.0118
bin/68	M2327_1.02	cisbp_motifs	0.0037	0	0
bin/68	M4880_1.02	cisbp_motifs	0.0066	0.0086	0.0079
bin/68	M1912_1.02	cisbp_motifs	0.0046	0.0043	0.0039
bin/68	M5003_1.02	cisbp_motifs	0.0032	0	0.0039
bin/68	M5006_1.02	cisbp_motifs	0.0043	0.0086	0
bin/68	M6459_1.02	cisbp_motifs	0.0084	0.0086	0.0157
bin/68	M4850_1.02	cisbp_motifs	0.0072	0.0172	0.0118
bin/68	M6235_1.02	cisbp_motifs	0.0058	0.03	0.0472
bin/68	M4860_1.02	cisbp_motifs	0.0043	0.0043	0
bin/68	M5037_1.02	cisbp_motifs	0.0049	0	0.0118
bin/68	M4672_1.02	cisbp_motifs	0.0043	0.0086	0
bin/68	M5203_1.02	cisbp_motifs	0.0026	0.0043	0.0079
bin/68	M5168_1.02	cisbp_motifs	0.0314	0.0259	0.0784
bin/68	M4866_1.02	cisbp_motifs	0.0026	0.0086	0.0118
bin/68	M4927_1.02	cisbp_motifs	0.002	0.0043	0
bin/68	M5048_1.02	cisbp_motifs	0.0309	0.0343	0.0512
bin/68	M4889_1.02	cisbp_motifs	0.0055	0.0129	0.0078
bin/68	M5102_1.02	cisbp_motifs	0.0052	0	0.0079
bin/68	M4674_1.02	cisbp_motifs	0.0055	0.0043	0.0039
bin/68	M1890_1.02	cisbp_motifs	0.0035	0.0086	0.0039
bin/68	M5158_1.02	cisbp_motifs	0.0035	0	0.0039
bin/68	M4842_1.02	cisbp_motifs	0.0029	0.0086	0
bin/68	M2259_1.02	cisbp_motifs	0.0061	0.0086	0
bin/68	M4722_1.02	cisbp_motifs	0.0055	0	0.0039
bin/68	M5244_1.02	cisbp_motifs	0.0046	0.0129	0
bin/68	M5186_1.02	cisbp_motifs	0.0043	0.0086	0.0196
bin/68	M4912_1.02	cisbp_motifs	0.0029	0	0.0078
bin/68	M4865_1.02	cisbp_motifs	0.0104	0.0043	0.0196
bin/68	M5079_1.02	cisbp_motifs	0.0063	0.0043	0.0079
bin/68	M5660_1.02	cisbp_motifs	0.0029	0.0086	0.0039
bin/68	M5148_1.02	cisbp_motifs	0.0061	0.0043	0.0078
bin/68	M4867_1.02	cisbp_motifs	0.0052	0.0086	0.0118
bin/68	M4900_1.02	cisbp_motifs	0.0017	0.0043	0
bin/68	M4819_1.02	cisbp_motifs	0.0032	0.0086	0.0039
bin/68	M5035_1.02	cisbp_motifs	0.0052	0	0
bin/68	M4873_1.02	cisbp_motifs	0.0026	0.0086	0
bin/68	M5209_1.02	cisbp_motifs	0.0052	0.0086	0.0157
bin/68	M4802_1.02	cisbp_motifs	0.0035	0.0043	0.0039
bin/68	M4897_1.02	cisbp_motifs	0.0026	0.0086	0.0039
bin/68	M5219_1.02	cisbp_motifs	0.0046	0	0.0039
bin/68	M4633_1.02	cisbp_motifs	0.0032	0	0.0078
bin/68	M4748_1.02	cisbp_motifs	9.00E-04	0.0043	0.0039
bin/68	M4837_1.02	cisbp_motifs	0.0055	0.0172	0.0157
bin/68	M4934_1.02	cisbp_motifs	0.0017	0.0043	0.0078
bin/68	M4813_1.02	cisbp_motifs	0.0032	0	0
bin/68	M1854_1.02	cisbp_motifs	0.0055	0	0.0078
bin/68	M5185_1.02	cisbp_motifs	0.0026	0	0.0039
bin/68	M6277_1.02	cisbp_motifs	0.0014	0	0
bin/68	M4879_1.02	cisbp_motifs	0.0061	0	0
bin/68	M6537_1.02	cisbp_motifs	0.0023	0.0043	0.0079
bin/68	M5054_1.02	cisbp_motifs	0.0101	0.0129	0.0039
bin/68	M5018_1.02	cisbp_motifs	0.0035	0.0086	0.0039
bin/68	M4922_1.02	cisbp_motifs	0.0035	0	0
bin/68	M4811_1.02	cisbp_motifs	0.0058	0.0129	0.0118
bin/68	M4824_1.02	cisbp_motifs	0.0052	0.0172	0.0039
bin/68	M4767_1.02	cisbp_motifs	0.0052	0	0.0039
bin/68	M4803_1.02	cisbp_motifs	0.0017	0.0043	0.0079
bin/68	M5030_1.02	cisbp_motifs	0.0037	0	0.0039
bin/68	M5039_1.02	cisbp_motifs	0.004	0.0215	0
bin/68	M4913_1.02	cisbp_motifs	0.0026	0	0
bin/68	M5189_1.02	cisbp_motifs	0.0017	0	0
bin/68	M4735_1.02	cisbp_motifs	0.0029	0.0086	0.0039
bin/68	M4952_1.02	cisbp_motifs	0.0017	0.0043	0.0118
bin/68	M4892_1.02	cisbp_motifs	0.004	0.0086	0
bin/68	M4750_1.02	cisbp_motifs	0.0014	0	0
bin/68	M5222_1.02	cisbp_motifs	0.0032	0	0.0039
bin/68	M5348_1.02	cisbp_motifs	0.0049	0	0.0079
bin/68	M5103_1.02	cisbp_motifs	0.0049	0.0043	0
bin/68	M5213_1.02	cisbp_motifs	0.0026	0.0043	0.0039
bin/68	M4939_1.02	cisbp_motifs	0.0046	0.0043	0.0039
bin/68	M0580_1.02	cisbp_motifs	0.0043	0.0043	0.0039
bin/68	M5182_1.02	cisbp_motifs	0.0029	0.0086	0.0039
bin/68	M5051_1.02	cisbp_motifs	6.00E-04	0	0
bin/68	M5050_1.02	cisbp_motifs	6.00E-04	0	0
bin/68	M4911_1.02	cisbp_motifs	0.0012	0.0043	0
bin/68	M4899_1.02	cisbp_motifs	0.0063	0.0129	0
bin/68	M5217_1.02	cisbp_motifs	3.00E-04	0	0.0078
bin/68	M5207_1.02	cisbp_motifs	0.004	0	0
bin/68	M5128_1.02	cisbp_motifs	0.002	0	0
bin/68	M5022_1.02	cisbp_motifs	0.0029	0.0043	0
bin/68	M5097_1.02	cisbp_motifs	0.0052	0	0.0039
bin/68	M4526_1.02	cisbp_motifs	0.0014	0.0043	0.0039
bin/68	M6166_1.02	cisbp_motifs	0.0029	0.0043	0
bin/68	M6410_1.02	cisbp_motifs	0.0012	0	0.0039
bin/68	M4966_1.02	cisbp_motifs	0.0032	0.0129	0
bin/68	M4930_1.02	cisbp_motifs	3.00E-04	0	0.0078
bin/68	M4929_1.02	cisbp_motifs	3.00E-04	0	0.0078
bin/68	M1095_1.02	cisbp_motifs	0.0029	0.0043	0.0039
bin/68	M5121_1.02	cisbp_motifs	0.0037	0.0043	0.0039
bin/68	M5059_1.02	cisbp_motifs	0.0014	0	0.0039
bin/68	M4937_1.02	cisbp_motifs	0.0017	0	0
bin/68	M4840_1.02	cisbp_motifs	0.0049	0	0.0079
bin/68	M1837_1.02	cisbp_motifs	0.0043	0.0043	0
bin/68	M4823_1.02	cisbp_motifs	0.002	0	0
bin/68	M5020_1.02	cisbp_motifs	0.0026	0	0
bin/68	M2247_1.02	cisbp_motifs	0.0066	0.0086	0.0118
bin/68	M5029_1.02	cisbp_motifs	0.0032	0	0
bin/68	M5011_1.02	cisbp_motifs	0.002	0.0043	0.0078
bin/68	M1850_1.02	cisbp_motifs	0.0014	0	0.0039
bin/68	M5099_1.02	cisbp_motifs	0.0061	0	0.0197
bin/68	M6186_1.02	cisbp_motifs	0.0026	0	0
bin/68	M5190_1.02	cisbp_motifs	0.0055	0.0043	0.0039
bin/68	M5177_1.02	cisbp_motifs	0.0055	0.0043	0.0039
bin/68	M4673_1.02	cisbp_motifs	0.0066	0.0129	0.0196
bin/68	M2249_1.02	cisbp_motifs	0.004	0	0.0118
bin/68	M1628_1.02	cisbp_motifs	0.0026	0	0.0039
bin/68	M1471_1.02	cisbp_motifs	9.00E-04	0	0
bin/68	M4924_1.02	cisbp_motifs	0.0066	0	0.0039
bin/68	M6374_1.02	cisbp_motifs	0.0026	0.0043	0
bin/68	M5025_1.02	cisbp_motifs	0.0043	0	0
bin/68	M4949_1.02	cisbp_motifs	0.0035	0	0.0039
bin/68	M4919_1.02	cisbp_motifs	0.0017	0	0
bin/68	M4918_1.02	cisbp_motifs	0.0017	0	0
bin/68	M4677_1.02	cisbp_motifs	0.004	0.0043	0.0078
bin/68	M1524_1.02	cisbp_motifs	0.0017	0	0.0039
bin/68	M1100_1.02	cisbp_motifs	0.0029	0	0.0078
bin/68	M0302_1.02	cisbp_motifs	0.0012	0	0.0039
bin/68	M4969_1.02	cisbp_motifs	0.002	0.0172	0
bin/68	M5272_1.02	cisbp_motifs	0.0012	0	0
bin/68	M4747_1.02	cisbp_motifs	9.00E-04	0	0
bin/68	M4896_1.02	cisbp_motifs	0.0014	0	0.0039
bin/68	M4895_1.02	cisbp_motifs	0.0014	0	0.0039
bin/68	M4985_1.02	cisbp_motifs	0.0032	0.0129	0
bin/68	M4670_1.02	cisbp_motifs	0.0029	0.0086	0
bin/68	M5234_1.02	cisbp_motifs	0.0012	0	0
bin/68	M5152_1.02	cisbp_motifs	0.0035	0.0129	0.0118
bin/68	M4988_1.02	cisbp_motifs	0.0046	0.0043	0
bin/68	M4669_1.02	cisbp_motifs	0.0017	0	0.0039
bin/68	M2387_1.02	cisbp_motifs	0.002	0	0
bin/68	M1092_1.02	cisbp_motifs	9.00E-04	0	0
bin/68	M1089_1.02	cisbp_motifs	0.0023	0	0
bin/68	M5263_1.02	cisbp_motifs	0.0014	0	0.0039
bin/68	M5247_1.02	cisbp_motifs	0.0095	0.0129	0.0157
bin/68	M4971_1.02	cisbp_motifs	0.0035	0.0043	0
bin/68	M4794_1.02	cisbp_motifs	0.004	0.0172	0
bin/68	M1529_1.02	cisbp_motifs	0.0035	0	0
bin/68	M4906_1.02	cisbp_motifs	0.0012	0	0
bin/68	M5227_1.02	cisbp_motifs	0.0012	0.0086	0
bin/68	M5187_1.02	cisbp_motifs	0.0026	0.0043	0.0039
bin/68	M4914_1.02	cisbp_motifs	0.0012	0.0043	0
bin/68	M1631_1.02	cisbp_motifs	0.002	0	0
bin/68	M1094_1.02	cisbp_motifs	0.0023	0	0
bin/68	M6238_1.02	cisbp_motifs	0.0066	0.0345	0.0431
bin/68	M5283_1.02	cisbp_motifs	0.0029	0	0
bin/68	M4800_1.02	cisbp_motifs	0.0012	0.0043	0
bin/68	M2251_1.02	cisbp_motifs	6.00E-04	0	0
bin/68	M0319_1.02	cisbp_motifs	9.00E-04	0.0043	0
bin/68	M4869_1.02	cisbp_motifs	0.002	0	0.0039
bin/68	M1097_1.02	cisbp_motifs	0.0014	0	0
bin/68	M0723_1.02	cisbp_motifs	0.0046	0.0086	0.0392
bin/68	M5047_1.02	cisbp_motifs	0.0127	0.0172	0.0039
bin/68	M5009_1.02	cisbp_motifs	0.0035	0	0.0039
bin/68	M0576_1.02	cisbp_motifs	0.0017	0	0
bin/68	M4882_1.02	cisbp_motifs	0.0012	0.0043	0
bin/68	M5060_1.02	cisbp_motifs	0.0037	0.0043	0
bin/68	M4926_1.02	cisbp_motifs	0.0037	0.0043	0.0039
bin/68	M4765_1.02	cisbp_motifs	0.0029	0.0043	0.0039
bin/68	M1519_1.02	cisbp_motifs	0.0029	0.0129	0.0118
bin/68	M1849_1.02	cisbp_motifs	0.0061	0.0086	0.0079
bin/68	M5256_1.02	cisbp_motifs	0.002	0.0086	0.0039
bin/68	M5159_1.02	cisbp_motifs	9.00E-04	0	0
bin/68	M5142_1.02	cisbp_motifs	0.0049	0.0129	0
bin/68	M5024_1.02	cisbp_motifs	0.0026	0	0
bin/68	M5019_1.02	cisbp_motifs	0.0023	0	0
bin/68	M4996_1.02	cisbp_motifs	0.0037	0.0086	0
bin/68	M4954_1.02	cisbp_motifs	0.0012	0	0
bin/68	M5224_1.02	cisbp_motifs	0.0014	0	0.0039
bin/68	M0740_1.02	cisbp_motifs	0.0058	0.0129	0.0591
bin/68	M0737_1.02	cisbp_motifs	0.0072	0.0086	0.0431
bin/68	M0641_1.02	cisbp_motifs	0.0026	0	0
bin/68	M5704_1.02	cisbp_motifs	0.0014	0	0
bin/68	M4708_1.02	cisbp_motifs	0.0052	0.0043	0.0039
bin/68	M1093_1.02	cisbp_motifs	9.00E-04	0.0043	0
bin/68	M4817_1.02	cisbp_motifs	0.0023	0	0.0078
bin/68	M4676_1.02	cisbp_motifs	0.0055	0	0.0039
bin/68	M1091_1.02	cisbp_motifs	0.002	0	0
bin/68	M5233_1.02	cisbp_motifs	6.00E-04	0	0
bin/68	M5157_1.02	cisbp_motifs	3.00E-04	0	0.0079
bin/68	M4953_1.02	cisbp_motifs	0.0014	0	0.0118
bin/68	M4739_1.02	cisbp_motifs	6.00E-04	0	0.0039
bin/68	M1102_1.02	cisbp_motifs	0.0014	0	0
bin/68	M5116_1.02	cisbp_motifs	0.0023	0.0043	0
bin/68	M5004_1.02	cisbp_motifs	0.0012	0	0
bin/68	M4831_1.02	cisbp_motifs	0.0023	0	0
bin/68	M4757_1.02	cisbp_motifs	0.0066	0.0043	0.0078
bin/68	M1088_1.02	cisbp_motifs	0.0017	0	0
bin/68	M1099_1.02	cisbp_motifs	0.0017	0	0
bin/68	M6394_1.02	cisbp_motifs	9.00E-04	0	0
bin/68	M5173_1.02	cisbp_motifs	0.0043	0.0086	0.0039
bin/68	M5172_1.02	cisbp_motifs	0.0043	0.0086	0.0039
bin/68	M4921_1.02	cisbp_motifs	0.002	0	0
bin/68	M4902_1.02	cisbp_motifs	0.002	0	0
bin/68	M4808_1.02	cisbp_motifs	0.0037	0.0043	0.0079
bin/68	M2060_1.02	cisbp_motifs	0.0037	0	0
bin/68	M1599_1.02	cisbp_motifs	0.0023	0	0
bin/68	M5280_1.02	cisbp_motifs	0.0014	0	0
bin/68	M5052_1.02	cisbp_motifs	0.0026	0	0
bin/68	M4783_1.02	cisbp_motifs	0.0026	0	0.0039
bin/68	M5023_1.02	cisbp_motifs	0.0026	0	0
bin/68	M4770_1.02	cisbp_motifs	0.0032	0.0043	0
bin/68	M4728_1.02	cisbp_motifs	0.0035	0.0043	0.0118
bin/68	M5167_1.02	cisbp_motifs	0.0058	0.0043	0.0039
bin/68	M5180_1.02	cisbp_motifs	0.0014	0	0
bin/68	M4973_1.02	cisbp_motifs	0.0026	0.0043	0.0157
bin/68	M4923_1.02	cisbp_motifs	0.0023	0	0
bin/68	M4901_1.02	cisbp_motifs	0.0017	0	0
bin/68	M4859_1.02	cisbp_motifs	0.0037	0	0.0078
bin/68	M4830_1.02	cisbp_motifs	0.004	0.0129	0.0353
bin/68	M2263_1.02	cisbp_motifs	9.00E-04	0	0
bin/68	M1946_1.02	cisbp_motifs	0	0	0.0039
bin/68	M1090_1.02	cisbp_motifs	0.0029	0	0
bin/68	M4883_1.02	cisbp_motifs	0.0014	0.0086	0
bin/68	M5043_1.02	cisbp_motifs	0.0017	0	0
bin/68	M6237_1.02	cisbp_motifs	0.0092	0.0345	0.0392
bin/68	M1101_1.02	cisbp_motifs	0.0012	0	0.0079
bin/68	M4857_1.02	cisbp_motifs	0.0012	0.0086	0.0039
bin/68	M4951_1.02	cisbp_motifs	0.0014	0	0.0078
bin/68	M0713_1.02	cisbp_motifs	0.0014	0	0.0039
bin/68	M5265_1.02	cisbp_motifs	0.002	0	0
bin/68	M5179_1.02	cisbp_motifs	0.0012	0	0.0039
bin/68	M5113_1.02	cisbp_motifs	0.0014	0	0
bin/68	M5104_1.02	cisbp_motifs	0.0014	0	0
bin/68	M4894_1.02	cisbp_motifs	9.00E-04	0	0.0039
bin/68	M4893_1.02	cisbp_motifs	9.00E-04	0	0.0039
bin/68	M4829_1.02	cisbp_motifs	0.004	0.0086	0
bin/68	M4769_1.02	cisbp_motifs	6.00E-04	0	0.0039
bin/68	M4725_1.02	cisbp_motifs	0.0023	0	0
bin/68	M4724_1.02	cisbp_motifs	0.0023	0	0
bin/68	M1469_1.02	cisbp_motifs	0.0012	0	0
bin/68	M0817_1.02	cisbp_motifs	0.002	0	0.0039
bin/68	M5241_1.02	cisbp_motifs	0.0032	0	0
bin/68	M5108_1.02	cisbp_motifs	0.0014	0	0
bin/68	M5107_1.02	cisbp_motifs	0.0014	0	0
bin/68	M4933_1.02	cisbp_motifs	0.0012	0	0
bin/68	M4787_1.02	cisbp_motifs	0.0049	0.0086	0.0039
bin/68	M1623_1.02	cisbp_motifs	9.00E-04	0	0
bin/68	M1470_1.02	cisbp_motifs	0.0014	0	0
bin/68	M5036_1.02	cisbp_motifs	0.0014	0	0
bin/68	M4947_1.02	cisbp_motifs	0.0014	0.0043	0
bin/68	M4891_1.02	cisbp_motifs	9.00E-04	0	0
bin/68	M1098_1.02	cisbp_motifs	9.00E-04	0.0043	0
bin/68	M1096_1.02	cisbp_motifs	0.0012	0	0
bin/68	M0135_1.02	cisbp_motifs	0.0043	0.0043	0.0078
bin/68	M4847_1.02	cisbp_motifs	0.0029	0	0.0039
bin/68	M1960_1.02	cisbp_motifs	0.002	0	0.0039
bin/68	M5194_1.02	cisbp_motifs	0.0026	0	0
bin/68	M5144_1.02	cisbp_motifs	0.0014	0	0.0039
bin/68	M4982_1.02	cisbp_motifs	0.002	0	0.0039
bin/68	M4931_1.02	cisbp_motifs	6.00E-04	0	0
bin/68	M4878_1.02	cisbp_motifs	0.0012	0	0.0079
bin/68	M4826_1.02	cisbp_motifs	0.0012	0	0.0039
bin/68	M4730_1.02	cisbp_motifs	0.004	0	0.0039
bin/68	M1104_1.02	cisbp_motifs	0.0026	0	0
bin/68	M0967_1.02	cisbp_motifs	0.0023	0	0
bin/68	M4843_1.02	cisbp_motifs	0.0023	0	0.0079
bin/68	M5174_1.02	cisbp_motifs	0.0017	0	0.0039
bin/68	M4720_1.02	cisbp_motifs	0.0023	0	0
bin/68	M5252_1.02	cisbp_motifs	0.0017	0	0
bin/68	M5208_1.02	cisbp_motifs	0.0012	0	0
bin/68	M5199_1.02	cisbp_motifs	0.0029	0.0043	0.0394
bin/68	M4977_1.02	cisbp_motifs	9.00E-04	0	0.0039
bin/68	M4820_1.02	cisbp_motifs	0.0012	0	0
bin/68	M4788_1.02	cisbp_motifs	0.0017	0	0.0039
bin/68	M4743_1.02	cisbp_motifs	0.0026	0.0129	0.0118
bin/68	M0736_1.02	cisbp_motifs	0.0035	0.0086	0.0353
bin/68	M0111_1.02	cisbp_motifs	0.0017	0	0
bin/68	M4964_1.02	cisbp_motifs	0.0035	0.0129	0.0354
bin/68	M4872_1.02	cisbp_motifs	0.0032	0.0043	0
bin/68	M1869_1.02	cisbp_motifs	0.0014	0	0
bin/68	M1858_1.02	cisbp_motifs	0.0012	0	0.0078
bin/68	M5273_1.02	cisbp_motifs	6.00E-04	0	0
bin/68	M5101_1.02	cisbp_motifs	9.00E-04	0	0
bin/68	M5081_1.02	cisbp_motifs	9.00E-04	0.0043	0
bin/68	M5064_1.02	cisbp_motifs	6.00E-04	0	0
bin/68	M4745_1.02	cisbp_motifs	6.00E-04	0	0
bin/68	M4675_1.02	cisbp_motifs	3.00E-04	0	0.0039
bin/68	M5109_1.02	cisbp_motifs	0.0046	0.0086	0.0157
bin/68	M2037_1.02	cisbp_motifs	9.00E-04	0	0
bin/68	M5196_1.02	cisbp_motifs	0.0029	0	0.0039
bin/68	M4863_1.02	cisbp_motifs	0.0023	0	0.0039
bin/68	M2006_1.02	cisbp_motifs	0.0035	0.0043	0.0079
bin/68	M1242_1.02	cisbp_motifs	9.00E-04	0	0.0039
bin/68	M1223_1.02	cisbp_motifs	0.0014	0	0.0039
bin/68	M1105_1.02	cisbp_motifs	9.00E-04	0	0
bin/68	M1103_1.02	cisbp_motifs	0.0014	0	0.0039
bin/68	M0596_1.02	cisbp_motifs	0.0037	0	0.0039
bin/68	M2031_1.02	cisbp_motifs	0.0017	0.0043	0
bin/68	M5147_1.02	cisbp_motifs	0.0012	0	0
bin/68	M2002_1.02	cisbp_motifs	6.00E-04	0	0
bin/68	M5111_1.02	cisbp_motifs	0.0012	0	0
bin/68	M4948_1.02	cisbp_motifs	6.00E-04	0	0
bin/68	M5164_1.02	cisbp_motifs	0.0035	0.0043	0.0079
bin/68	M5137_1.02	cisbp_motifs	0.0032	0.0043	0.0079
bin/68	M5007_1.02	cisbp_motifs	0.0035	0.0043	0.0079
bin/68	M4997_1.02	cisbp_motifs	0.0075	0.0086	0.0118
bin/68	M4790_1.02	cisbp_motifs	0.0046	0.0043	0.0079
bin/68	M1992_1.02	cisbp_motifs	0.0032	0.0043	0.0079
bin/68	M1918_1.02	cisbp_motifs	0.004	0.0043	0.0079
bin/68	M1106_1.02	cisbp_motifs	0.0014	0	0
bin/68	M5221_1.02	cisbp_motifs	6.00E-04	0	0
bin/68	M5034_1.02	cisbp_motifs	6.00E-04	0	0
bin/68	M4809_1.02	cisbp_motifs	0.0017	0.0043	0.0078
bin/68	M5119_1.02	cisbp_motifs	0.002	0	0
bin/68	M4983_1.02	cisbp_motifs	0.0017	0	0.0078
bin/68	M2046_1.02	cisbp_motifs	0.0012	0	0
bin/68	M2029_1.02	cisbp_motifs	0.0026	0	0
bin/1012	M4876_1.02	cisbp_motifs	0.0183	0.0088	0.0147
bin/1012	M5065_1.02	cisbp_motifs	0.0178	0.0177	0.0098
bin/1012	M2328_1.02	cisbp_motifs	0.0088	0	0.0098
bin/1012	M4898_1.02	cisbp_motifs	0.0172	0.0088	0.0098
bin/1012	M4870_1.02	cisbp_motifs	0.0095	0.0088	0.0049
bin/1012	M5215_1.02	cisbp_motifs	0.0172	0	0.0098
bin/1012	M6501_1.02	cisbp_motifs	0.0085	0.0177	0.0196
bin/1012	M2325_1.02	cisbp_motifs	0.0041	0.0265	0
bin/1012	M5151_1.02	cisbp_motifs	0.0041	0	0
bin/1012	M5211_1.02	cisbp_motifs	0.0293	0.0088	0.0147
bin/1012	M5030_1.02	cisbp_motifs	0.0036	0	0.0049
bin/1012	M4885_1.02	cisbp_motifs	0.0026	0	0
bin/1012	M5148_1.02	cisbp_motifs	0.0064	0	0.0049
bin/1012	M2327_1.02	cisbp_motifs	0.0049	0	0
bin/1012	M5048_1.02	cisbp_motifs	0.0283	0.0265	0.0294
bin/1012	M5006_1.02	cisbp_motifs	0.0057	0	0.0098
bin/1012	M6235_1.02	cisbp_motifs	0.0041	0.0354	0.0735
bin/1012	M6459_1.02	cisbp_motifs	0.0067	0	0
bin/1012	M4850_1.02	cisbp_motifs	0.01	0.0265	0.0049
bin/1012	M5003_1.02	cisbp_motifs	0.0028	0.0177	0
bin/1012	M1912_1.02	cisbp_motifs	0.0041	0.0088	0.0098
bin/1012	M4860_1.02	cisbp_motifs	0.0041	0.0088	0.0049
bin/1012	M5660_1.02	cisbp_motifs	0.0028	0	0.0196
bin/1012	M5037_1.02	cisbp_motifs	0.0036	0	0
bin/1012	M4672_1.02	cisbp_motifs	0.0036	0	0.0049
bin/1012	M5203_1.02	cisbp_motifs	0.0033	0	0.0049
bin/1012	M5168_1.02	cisbp_motifs	0.0275	0.0265	0.0343
bin/1012	M4866_1.02	cisbp_motifs	0.0049	0.0088	0
bin/1012	M5102_1.02	cisbp_motifs	0.0088	0.0177	0.0049
bin/1012	M4889_1.02	cisbp_motifs	0.0057	0.0088	0.0147
bin/1012	M4674_1.02	cisbp_motifs	0.0049	0	0
bin/1012	M1890_1.02	cisbp_motifs	0.0036	0	0.0049
bin/1012	M5158_1.02	cisbp_motifs	0.0054	0.0088	0
bin/1012	M4880_1.02	cisbp_motifs	0.0054	0	0
bin/1012	M2259_1.02	cisbp_motifs	0.0067	0	0.0049
bin/1012	M4842_1.02	cisbp_motifs	0.0051	0	0
bin/1012	M4722_1.02	cisbp_motifs	0.0049	0	0.0049
bin/1012	M5186_1.02	cisbp_motifs	0.0039	0	0.0049
bin/1012	M4912_1.02	cisbp_motifs	0.0031	0	0
bin/1012	M4865_1.02	cisbp_motifs	0.0103	0.0088	0.0049
bin/1012	M4879_1.02	cisbp_motifs	0.0015	0.0088	0.0098
bin/1012	M5079_1.02	cisbp_motifs	0.008	0.0088	0.0049
bin/1012	M4633_1.02	cisbp_motifs	0.0013	0	0.0049
bin/1012	M4900_1.02	cisbp_motifs	0.0021	0	0
bin/1012	M5185_1.02	cisbp_motifs	0.0023	0	0
bin/1012	M4867_1.02	cisbp_motifs	0.0033	0.0088	0.0098
bin/1012	M5035_1.02	cisbp_motifs	0.0049	0	0
bin/1012	M4873_1.02	cisbp_motifs	0.0044	0	0.0049
bin/1012	M5209_1.02	cisbp_motifs	0.0062	0.0177	0
bin/1012	M4824_1.02	cisbp_motifs	0.0046	0.0177	0
bin/1012	M4802_1.02	cisbp_motifs	0.0026	0	0.0147
bin/1012	M4897_1.02	cisbp_motifs	0.0028	0.0177	0.0049
bin/1012	M4927_1.02	cisbp_motifs	0.0026	0	0
bin/1012	M5219_1.02	cisbp_motifs	0.0054	0.0088	0.0049
bin/1012	M6277_1.02	cisbp_motifs	5.00E-04	0	0
bin/1012	M5244_1.02	cisbp_motifs	0.0044	0	0
bin/1012	M4748_1.02	cisbp_motifs	0.0015	0.0088	0.0049
bin/1012	M4837_1.02	cisbp_motifs	0.0062	0.0177	0.0049
bin/1012	M1854_1.02	cisbp_motifs	0.0046	0.0088	0.0245
bin/1012	M5054_1.02	cisbp_motifs	0.0157	0	0.0147
bin/1012	M5018_1.02	cisbp_motifs	0.0033	0	0.0098
bin/1012	M4922_1.02	cisbp_motifs	0.0041	0	0.0049
bin/1012	M6537_1.02	cisbp_motifs	0.0021	0	0
bin/1012	M4811_1.02	cisbp_motifs	0.0082	0	0.0098
bin/1012	M4934_1.02	cisbp_motifs	0.0041	0	0
bin/1012	M4767_1.02	cisbp_motifs	0.0049	0.0265	0.0049
bin/1012	M1471_1.02	cisbp_motifs	0.0021	0	0
bin/1012	M4803_1.02	cisbp_motifs	0.0015	0	0
bin/1012	M5039_1.02	cisbp_motifs	0.0026	0	0
bin/1012	M4913_1.02	cisbp_motifs	0.0018	0	0.0049
bin/1012	M4750_1.02	cisbp_motifs	0.0013	0.0088	0
bin/1012	M4735_1.02	cisbp_motifs	0.0018	0.0088	0.0049
bin/1012	M5189_1.02	cisbp_motifs	0.0041	0	0
bin/1012	M4952_1.02	cisbp_motifs	0.0026	0.0088	0.0049
bin/1012	M4892_1.02	cisbp_motifs	0.0044	0	0.0098
bin/1012	M5022_1.02	cisbp_motifs	0.0026	0	0.0049
bin/1012	M5222_1.02	cisbp_motifs	0.0033	0.0177	0
bin/1012	M4819_1.02	cisbp_motifs	0.0031	0	0
bin/1012	M5103_1.02	cisbp_motifs	0.0054	0	0.0049
bin/1012	M4939_1.02	cisbp_motifs	0.0049	0	0
bin/1012	M5213_1.02	cisbp_motifs	0.0018	0.0088	0.0049
bin/1012	M0580_1.02	cisbp_motifs	0.0026	0.0088	0.0049
bin/1012	M5348_1.02	cisbp_motifs	0.0023	0	0
bin/1012	M5217_1.02	cisbp_motifs	0.0013	0.0088	0
bin/1012	M5182_1.02	cisbp_motifs	0.0028	0.0088	0
bin/1012	M5207_1.02	cisbp_motifs	0.0028	0	0
bin/1012	M5128_1.02	cisbp_motifs	0.0023	0	0
bin/1012	M4899_1.02	cisbp_motifs	0.0049	0.0177	0.0098
bin/1012	M5051_1.02	cisbp_motifs	8.00E-04	0	0.0049
bin/1012	M5050_1.02	cisbp_motifs	8.00E-04	0	0.0049
bin/1012	M5097_1.02	cisbp_motifs	0.0031	0	0.0049
bin/1012	M4526_1.02	cisbp_motifs	0.0028	0	0
bin/1012	M4840_1.02	cisbp_motifs	0.0049	0.0088	0.0098
bin/1012	M1837_1.02	cisbp_motifs	0.0033	0	0.0147
bin/1012	M6410_1.02	cisbp_motifs	8.00E-04	0.0088	0.0049
bin/1012	M5121_1.02	cisbp_motifs	0.0033	0	0
bin/1012	M5059_1.02	cisbp_motifs	0.0026	0	0
bin/1012	M4966_1.02	cisbp_motifs	0.0033	0	0.0049
bin/1012	M4937_1.02	cisbp_motifs	0.001	0	0
bin/1012	M4930_1.02	cisbp_motifs	5.00E-04	0.0088	0
bin/1012	M4929_1.02	cisbp_motifs	5.00E-04	0.0088	0
bin/1012	M1095_1.02	cisbp_motifs	0.0026	0	0
bin/1012	M6166_1.02	cisbp_motifs	0.0018	0.0088	0.0049
bin/1012	M5011_1.02	cisbp_motifs	0.0046	0	0.0098
bin/1012	M5020_1.02	cisbp_motifs	0.0026	0	0
bin/1012	M2247_1.02	cisbp_motifs	0.009	0.0088	0
bin/1012	M5029_1.02	cisbp_motifs	0.0028	0	0
bin/1012	M1850_1.02	cisbp_motifs	0.0031	0.0265	0.0049
bin/1012	M5099_1.02	cisbp_motifs	0.0041	0.0088	0.0147
bin/1012	M4813_1.02	cisbp_motifs	0.0028	0.0088	0
bin/1012	M6186_1.02	cisbp_motifs	0.0013	0	0
bin/1012	M5190_1.02	cisbp_motifs	0.0054	0	0.0049
bin/1012	M5177_1.02	cisbp_motifs	0.0054	0	0.0049
bin/1012	M4673_1.02	cisbp_motifs	0.0033	0.0265	0.0343
bin/1012	M2249_1.02	cisbp_motifs	0.0036	0.0088	0.0098
bin/1012	M1628_1.02	cisbp_motifs	0.0018	0.0088	0.0049
bin/1012	M4911_1.02	cisbp_motifs	0.0018	0	0
bin/1012	M4924_1.02	cisbp_motifs	0.0039	0.0088	0
bin/1012	M4823_1.02	cisbp_motifs	0.0033	0	0
bin/1012	M4919_1.02	cisbp_motifs	5.00E-04	0	0
bin/1012	M4918_1.02	cisbp_motifs	5.00E-04	0	0
bin/1012	M6374_1.02	cisbp_motifs	0.0033	0	0.0098
bin/1012	M5025_1.02	cisbp_motifs	0.0028	0.0088	0.0049
bin/1012	M4969_1.02	cisbp_motifs	0.0018	0.0177	0.0049
bin/1012	M4949_1.02	cisbp_motifs	0.0036	0	0
bin/1012	M4677_1.02	cisbp_motifs	0.0036	0	0
bin/1012	M1100_1.02	cisbp_motifs	0.0015	0	0
bin/1012	M0302_1.02	cisbp_motifs	0.0015	0.0088	0
bin/1012	M1524_1.02	cisbp_motifs	0.0023	0.0088	0
bin/1012	M5272_1.02	cisbp_motifs	0.0013	0	0
bin/1012	M4896_1.02	cisbp_motifs	0.0013	0	0.0049
bin/1012	M4895_1.02	cisbp_motifs	0.0013	0	0.0049
bin/1012	M4747_1.02	cisbp_motifs	0.0021	0	0
bin/1012	M4985_1.02	cisbp_motifs	0.0028	0.0088	0.0049
bin/1012	M5263_1.02	cisbp_motifs	0.001	0	0
bin/1012	M4794_1.02	cisbp_motifs	0.0039	0.0177	0.0049
bin/1012	M5234_1.02	cisbp_motifs	0.001	0	0
bin/1012	M5152_1.02	cisbp_motifs	0.0044	0	0.0049
bin/1012	M4971_1.02	cisbp_motifs	0.0036	0.0088	0.0049
bin/1012	M4670_1.02	cisbp_motifs	0.0028	0	0
bin/1012	M1529_1.02	cisbp_motifs	0.0033	0.0088	0
bin/1012	M1092_1.02	cisbp_motifs	8.00E-04	0	0
bin/1012	M1089_1.02	cisbp_motifs	0.001	0	0.0098
bin/1012	M5247_1.02	cisbp_motifs	0.0111	0.0088	0.0049
bin/1012	M4988_1.02	cisbp_motifs	0.0026	0	0
bin/1012	M4669_1.02	cisbp_motifs	0.0031	0.0177	0.0049
bin/1012	M2387_1.02	cisbp_motifs	0.0023	0	0
bin/1012	M4906_1.02	cisbp_motifs	0.0021	0	0
bin/1012	M5227_1.02	cisbp_motifs	0.0013	0	0
bin/1012	M5187_1.02	cisbp_motifs	0.0026	0	0.0049
bin/1012	M4914_1.02	cisbp_motifs	0.0015	0	0
bin/1012	M1631_1.02	cisbp_motifs	0.0015	0	0.0049
bin/1012	M1094_1.02	cisbp_motifs	0.0013	0	0.0049
bin/1012	M6238_1.02	cisbp_motifs	0.0116	0.0265	0.0343
bin/1012	M4869_1.02	cisbp_motifs	0.0013	0	0.0049
bin/1012	M2251_1.02	cisbp_motifs	3.00E-04	0	0
bin/1012	M1097_1.02	cisbp_motifs	8.00E-04	0	0
bin/1012	M0723_1.02	cisbp_motifs	0.0046	0.0177	0.0637
bin/1012	M0319_1.02	cisbp_motifs	0.0013	0	0
bin/1012	M5283_1.02	cisbp_motifs	0.0026	0	0.0049
bin/1012	M4800_1.02	cisbp_motifs	0.0039	0	0.0098
bin/1012	M5047_1.02	cisbp_motifs	0.0113	0	0.0196
bin/1012	M5009_1.02	cisbp_motifs	0.0031	0	0
bin/1012	M0576_1.02	cisbp_motifs	0.0031	0.0088	0.0049
bin/1012	M5060_1.02	cisbp_motifs	0.0018	0	0
bin/1012	M4926_1.02	cisbp_motifs	0.0031	0.0088	0
bin/1012	M4882_1.02	cisbp_motifs	0.0015	0	0
bin/1012	M4765_1.02	cisbp_motifs	0.0015	0	0.0147
bin/1012	M1849_1.02	cisbp_motifs	0.0064	0.0088	0.0049
bin/1012	M1519_1.02	cisbp_motifs	0.0064	0.0088	0.0098
bin/1012	M5256_1.02	cisbp_motifs	0.0015	0	0.0049
bin/1012	M5224_1.02	cisbp_motifs	0.0021	0	0.0049
bin/1012	M5159_1.02	cisbp_motifs	0.0015	0	0
bin/1012	M5024_1.02	cisbp_motifs	0.0021	0	0
bin/1012	M5019_1.02	cisbp_motifs	0.0021	0	0.0049
bin/1012	M4954_1.02	cisbp_motifs	0.0015	0	0
bin/1012	M5142_1.02	cisbp_motifs	0.0039	0	0
bin/1012	M4996_1.02	cisbp_motifs	0.0018	0	0.0196
bin/1012	M5704_1.02	cisbp_motifs	8.00E-04	0	0
bin/1012	M4708_1.02	cisbp_motifs	0.0044	0	0.0049
bin/1012	M0740_1.02	cisbp_motifs	0.0064	0.0354	0.0931
bin/1012	M0737_1.02	cisbp_motifs	0.0044	0.0177	0.0588
bin/1012	M0641_1.02	cisbp_motifs	0.0023	0	0
bin/1012	M1088_1.02	cisbp_motifs	0.0015	0.0088	0
bin/1012	M5233_1.02	cisbp_motifs	8.00E-04	0	0
bin/1012	M5116_1.02	cisbp_motifs	0.0023	0	0
bin/1012	M4831_1.02	cisbp_motifs	0.001	0	0
bin/1012	M5004_1.02	cisbp_motifs	0.001	0	0.0049
bin/1012	M1102_1.02	cisbp_motifs	0.0013	0.0088	0.0049
bin/1012	M1093_1.02	cisbp_motifs	8.00E-04	0	0
bin/1012	M1091_1.02	cisbp_motifs	0.001	0	0
bin/1012	M4817_1.02	cisbp_motifs	0.001	0	0
bin/1012	M4676_1.02	cisbp_motifs	0.0054	0	0
bin/1012	M5157_1.02	cisbp_motifs	0.0031	0.0088	0
bin/1012	M4953_1.02	cisbp_motifs	0.0033	0.0088	0
bin/1012	M4739_1.02	cisbp_motifs	0.0033	0.0088	0
bin/1012	M4757_1.02	cisbp_motifs	0.0041	0	0.0098
bin/1012	M6394_1.02	cisbp_motifs	0.0021	0	0
bin/1012	M5280_1.02	cisbp_motifs	3.00E-04	0	0.0049
bin/1012	M5173_1.02	cisbp_motifs	0.0031	0	0
bin/1012	M5172_1.02	cisbp_motifs	0.0031	0	0
bin/1012	M5052_1.02	cisbp_motifs	0.0031	0	0
bin/1012	M4921_1.02	cisbp_motifs	0.0021	0	0.0049
bin/1012	M4902_1.02	cisbp_motifs	0.0013	0	0
bin/1012	M4808_1.02	cisbp_motifs	0.0064	0	0.0049
bin/1012	M2060_1.02	cisbp_motifs	0.0015	0	0.0049
bin/1012	M1599_1.02	cisbp_motifs	0.001	0	0.0049
bin/1012	M1099_1.02	cisbp_motifs	0.001	0	0
bin/1012	M4783_1.02	cisbp_motifs	0.0026	0	0
bin/1012	M4770_1.02	cisbp_motifs	0.0028	0.0088	0
bin/1012	M4728_1.02	cisbp_motifs	0.0028	0	0
bin/1012	M5023_1.02	cisbp_motifs	0.0015	0	0
bin/1012	M5180_1.02	cisbp_motifs	0.0013	0	0
bin/1012	M5167_1.02	cisbp_motifs	0.0059	0.0177	0.0098
bin/1012	M4973_1.02	cisbp_motifs	0.0049	0.0354	0.0098
bin/1012	M4923_1.02	cisbp_motifs	0.001	0.0088	0.0049
bin/1012	M4901_1.02	cisbp_motifs	0.0028	0	0.0098
bin/1012	M4859_1.02	cisbp_motifs	0.0028	0	0.0049
bin/1012	M4830_1.02	cisbp_motifs	0.0057	0.0354	0.0392
bin/1012	M2263_1.02	cisbp_motifs	0.0023	0.0088	0
bin/1012	M1946_1.02	cisbp_motifs	0.0018	0	0
bin/1012	M1090_1.02	cisbp_motifs	0.0018	0	0.0049
bin/1012	M4883_1.02	cisbp_motifs	3.00E-04	0	0.0049
bin/1012	M6237_1.02	cisbp_motifs	0.009	0	0.0294
bin/1012	M5043_1.02	cisbp_motifs	8.00E-04	0	0.0049
bin/1012	M1101_1.02	cisbp_motifs	0.001	0	0.0049
bin/1012	M4857_1.02	cisbp_motifs	0.0018	0	0
bin/1012	M5113_1.02	cisbp_motifs	0.001	0	0.0049
bin/1012	M5104_1.02	cisbp_motifs	3.00E-04	0	0
bin/1012	M1469_1.02	cisbp_motifs	0.0018	0.0088	0.0049
bin/1012	M4829_1.02	cisbp_motifs	0.0023	0	0
bin/1012	M4769_1.02	cisbp_motifs	0.0013	0	0
bin/1012	M0817_1.02	cisbp_motifs	0.0018	0	0.0049
bin/1012	M5265_1.02	cisbp_motifs	0.001	0	0
bin/1012	M5179_1.02	cisbp_motifs	0.0013	0	0.0049
bin/1012	M4951_1.02	cisbp_motifs	0.0021	0.0088	0.0049
bin/1012	M4894_1.02	cisbp_motifs	3.00E-04	0	0
bin/1012	M4893_1.02	cisbp_motifs	3.00E-04	0	0
bin/1012	M4725_1.02	cisbp_motifs	0.0018	0	0.0049
bin/1012	M4724_1.02	cisbp_motifs	0.0018	0	0.0049
bin/1012	M0713_1.02	cisbp_motifs	0.0023	0.0088	0
bin/1012	M1470_1.02	cisbp_motifs	0.0021	0	0
bin/1012	M5241_1.02	cisbp_motifs	0.0021	0	0.0049
bin/1012	M5108_1.02	cisbp_motifs	5.00E-04	0	0
bin/1012	M5107_1.02	cisbp_motifs	5.00E-04	0	0
bin/1012	M4947_1.02	cisbp_motifs	0.0013	0	0
bin/1012	M4933_1.02	cisbp_motifs	0.0015	0.0088	0
bin/1012	M4891_1.02	cisbp_motifs	0.001	0.0088	0.0049
bin/1012	M1623_1.02	cisbp_motifs	0.0018	0	0
bin/1012	M1098_1.02	cisbp_motifs	5.00E-04	0	0
bin/1012	M1096_1.02	cisbp_motifs	0.0018	0	0
bin/1012	M5036_1.02	cisbp_motifs	0.0018	0	0
bin/1012	M4787_1.02	cisbp_motifs	0.0023	0	0.0049
bin/1012	M0135_1.02	cisbp_motifs	0.0044	0	0.0049
bin/1012	M5194_1.02	cisbp_motifs	0.0013	0.0088	0
bin/1012	M5144_1.02	cisbp_motifs	0.0015	0	0
bin/1012	M4982_1.02	cisbp_motifs	8.00E-04	0	0
bin/1012	M4931_1.02	cisbp_motifs	0.0015	0	0
bin/1012	M4878_1.02	cisbp_motifs	0.0013	0.0177	0.0098
bin/1012	M4847_1.02	cisbp_motifs	0.0015	0	0
bin/1012	M4826_1.02	cisbp_motifs	0.0013	0.0088	0
bin/1012	M4730_1.02	cisbp_motifs	0.0051	0	0.0049
bin/1012	M1960_1.02	cisbp_motifs	0.0018	0	0.0049
bin/1012	M1104_1.02	cisbp_motifs	0.0023	0	0.0049
bin/1012	M0967_1.02	cisbp_motifs	0.001	0.0088	0
bin/1012	M4843_1.02	cisbp_motifs	0.0021	0.0088	0.0049
bin/1012	M5252_1.02	cisbp_motifs	0.0015	0	0.0098
bin/1012	M5208_1.02	cisbp_motifs	0.0018	0	0.0098
bin/1012	M5199_1.02	cisbp_motifs	0.0023	0.0088	0.0441
bin/1012	M5174_1.02	cisbp_motifs	0.0015	0.0088	0
bin/1012	M4977_1.02	cisbp_motifs	0.0013	0.0088	0
bin/1012	M4964_1.02	cisbp_motifs	0.0033	0.0088	0.0637
bin/1012	M4872_1.02	cisbp_motifs	0.0026	0	0
bin/1012	M4820_1.02	cisbp_motifs	0.001	0	0
bin/1012	M4788_1.02	cisbp_motifs	0.0015	0.0088	0.0049
bin/1012	M4743_1.02	cisbp_motifs	0.0046	0.0088	0.0098
bin/1012	M4720_1.02	cisbp_motifs	0.0031	0	0.0098
bin/1012	M1869_1.02	cisbp_motifs	0.0013	0	0
bin/1012	M0736_1.02	cisbp_motifs	0.0049	0	0.0245
bin/1012	M0111_1.02	cisbp_motifs	0.001	0	0
bin/1012	M5081_1.02	cisbp_motifs	0.0023	0	0
bin/1012	M5273_1.02	cisbp_motifs	8.00E-04	0	0.0049
bin/1012	M5101_1.02	cisbp_motifs	0	0	0
bin/1012	M5064_1.02	cisbp_motifs	8.00E-04	0	0.0049
bin/1012	M4745_1.02	cisbp_motifs	8.00E-04	0	0.0049
bin/1012	M1858_1.02	cisbp_motifs	0.0018	0.0088	0.0049
bin/1012	M4675_1.02	cisbp_motifs	3.00E-04	0	0
bin/1012	M5196_1.02	cisbp_motifs	0.0018	0	0.0049
bin/1012	M5109_1.02	cisbp_motifs	0.0049	0	0.0049
bin/1012	M4863_1.02	cisbp_motifs	0.0018	0	0
bin/1012	M2037_1.02	cisbp_motifs	0.001	0	0.0049
bin/1012	M2006_1.02	cisbp_motifs	0.0023	0.0177	0
bin/1012	M1242_1.02	cisbp_motifs	8.00E-04	0	0
bin/1012	M1223_1.02	cisbp_motifs	0.0015	0	0
bin/1012	M1105_1.02	cisbp_motifs	3.00E-04	0	0.0049
bin/1012	M1103_1.02	cisbp_motifs	0.0013	0	0
bin/1012	M0596_1.02	cisbp_motifs	0.0021	0.0088	0.0049
bin/1012	M2031_1.02	cisbp_motifs	0.001	0	0.0098
bin/1012	M5147_1.02	cisbp_motifs	0.001	0.0088	0
bin/1012	M5111_1.02	cisbp_motifs	5.00E-04	0	0
bin/1012	M4948_1.02	cisbp_motifs	8.00E-04	0	0.0049
bin/1012	M2002_1.02	cisbp_motifs	0.0013	0	0
bin/1012	M5164_1.02	cisbp_motifs	0.0023	0.0177	0
bin/1012	M5137_1.02	cisbp_motifs	0.0018	0.0088	0.0049
bin/1012	M5007_1.02	cisbp_motifs	0.0023	0.0177	0
bin/1012	M4997_1.02	cisbp_motifs	0.009	0	0
bin/1012	M4790_1.02	cisbp_motifs	0.0026	0	0
bin/1012	M1992_1.02	cisbp_motifs	0.0031	0.0088	0
bin/1012	M1918_1.02	cisbp_motifs	0.0023	0.0088	0
bin/1012	M1106_1.02	cisbp_motifs	0.0015	0.0088	0
bin/1012	M5221_1.02	cisbp_motifs	0.001	0	0
bin/1012	M5034_1.02	cisbp_motifs	0.001	0	0
bin/1012	M4809_1.02	cisbp_motifs	0.0031	0.0088	0
bin/1012	M5119_1.02	cisbp_motifs	0.001	0	0
bin/1012	M4983_1.02	cisbp_motifs	0.001	0	0.0049
bin/1012	M2046_1.02	cisbp_motifs	8.00E-04	0	0
bin/1012	M2029_1.02	cisbp_motifs	0.0013	0	0
mef2/68	M4876_1.02	cisbp_motifs	0.0148	0.0271	0.0086
mef2/68	M5065_1.02	cisbp_motifs	0.0159	0.0271	0.0201
mef2/68	M2328_1.02	cisbp_motifs	0.006	0.0045	0.0086
mef2/68	M4898_1.02	cisbp_motifs	0.0099	0.0182	0.0114
mef2/68	M1912_1.02	cisbp_motifs	0.0034	0	0.0057
mef2/68	M4870_1.02	cisbp_motifs	0.0085	0.0045	0.0144
mef2/68	M5215_1.02	cisbp_motifs	0.0112	0.0249	0.0201
mef2/68	M6501_1.02	cisbp_motifs	0.0085	0.0068	0.0172
mef2/68	M2325_1.02	cisbp_motifs	0.0056	0.0068	0.0029
mef2/68	M5151_1.02	cisbp_motifs	0.0049	0.0045	0
mef2/68	M5211_1.02	cisbp_motifs	0.0282	0.0205	0.0257
mef2/68	M5030_1.02	cisbp_motifs	0.0027	0.0068	0.0029
mef2/68	M5148_1.02	cisbp_motifs	0.0045	0.0045	0.0114
mef2/68	M2327_1.02	cisbp_motifs	0.0034	0.0023	0
mef2/68	M5003_1.02	cisbp_motifs	0.0027	0.0045	0.0057
mef2/68	M5006_1.02	cisbp_motifs	0.0049	0.0045	0.0029
mef2/68	M6459_1.02	cisbp_motifs	0.0081	0.0045	0.0057
mef2/68	M6235_1.02	cisbp_motifs	0.0034	0.0046	0.0171
mef2/68	M4850_1.02	cisbp_motifs	0.0074	0.0091	0.0143
mef2/68	M4860_1.02	cisbp_motifs	0.0045	0.0045	0.0114
mef2/68	M5660_1.02	cisbp_motifs	0.0043	0	0.0029
mef2/68	M4885_1.02	cisbp_motifs	0.0029	0.0068	0.0028
mef2/68	M5037_1.02	cisbp_motifs	0.0045	0.0023	0.0085
mef2/68	M4672_1.02	cisbp_motifs	0.0049	0.0023	0.0029
mef2/68	M5203_1.02	cisbp_motifs	0.0049	0.0023	0.0029
mef2/68	M5168_1.02	cisbp_motifs	0.0282	0.0318	0.0286
mef2/68	M4866_1.02	cisbp_motifs	0.0029	0	0.0057
mef2/68	M5102_1.02	cisbp_motifs	0.0067	0.0114	0.0029
mef2/68	M4889_1.02	cisbp_motifs	0.0049	0.0068	0.0086
mef2/68	M4842_1.02	cisbp_motifs	0.0034	0.0023	0.0086
mef2/68	M5079_1.02	cisbp_motifs	0.006	0.0113	0.0115
mef2/68	M5048_1.02	cisbp_motifs	0.0305	0.0159	0.0287
mef2/68	M1890_1.02	cisbp_motifs	0.0043	0.0045	0.0114
mef2/68	M5186_1.02	cisbp_motifs	0.0049	0.0068	0.0029
mef2/68	M5158_1.02	cisbp_motifs	0.0043	0.0045	0
mef2/68	M4674_1.02	cisbp_motifs	0.0036	0.0023	0.0029
mef2/68	M4880_1.02	cisbp_motifs	0.004	0.0023	0.0115
mef2/68	M2259_1.02	cisbp_motifs	0.0047	0.0114	0.0057
mef2/68	M5219_1.02	cisbp_motifs	0.0034	0.0091	0.0086
mef2/68	M4879_1.02	cisbp_motifs	0.0034	0.0023	0.0057
mef2/68	M4722_1.02	cisbp_motifs	0.0058	0.0045	0.0029
mef2/68	M4912_1.02	cisbp_motifs	0.0027	0.0045	0.0057
mef2/68	M5244_1.02	cisbp_motifs	0.0054	0.0091	0
mef2/68	M4865_1.02	cisbp_motifs	0.0094	0.0113	0.0144
mef2/68	M5222_1.02	cisbp_motifs	0.0027	0.0023	0.0028
mef2/68	M4900_1.02	cisbp_motifs	7.00E-04	0	0.0029
mef2/68	M4867_1.02	cisbp_motifs	0.0043	0.0045	0.0029
mef2/68	M4819_1.02	cisbp_motifs	0.0043	0.0046	0.0028
mef2/68	M5039_1.02	cisbp_motifs	0.0034	0.0068	0.0057
mef2/68	M5035_1.02	cisbp_motifs	0.0045	0.0023	0.0029
mef2/68	M4873_1.02	cisbp_motifs	0.004	0.0023	0.0028
mef2/68	M5209_1.02	cisbp_motifs	0.0072	0.0068	0.0115
mef2/68	M4897_1.02	cisbp_motifs	0.0016	0.0023	0.0086
mef2/68	M4927_1.02	cisbp_motifs	0.0029	0.0045	0
mef2/68	M6277_1.02	cisbp_motifs	0.0011	0.0023	0.0028
mef2/68	M4633_1.02	cisbp_motifs	0.0016	0.0023	0.0029
mef2/68	M4802_1.02	cisbp_motifs	0.002	0	0.0028
mef2/68	M4748_1.02	cisbp_motifs	0.0038	0	0.0028
mef2/68	M4837_1.02	cisbp_motifs	0.0067	0.0068	0.0086
mef2/68	M4934_1.02	cisbp_motifs	0.0036	0.0068	0.0057
mef2/68	M1854_1.02	cisbp_motifs	0.0043	0.0068	0.0057
mef2/68	M5018_1.02	cisbp_motifs	0.0036	0.0023	0.0057
mef2/68	M4922_1.02	cisbp_motifs	0.0027	0	0.0115
mef2/68	M4811_1.02	cisbp_motifs	0.0056	0.0068	0.0086
mef2/68	M5054_1.02	cisbp_motifs	0.011	0.0159	0.0258
mef2/68	M6537_1.02	cisbp_motifs	0.0022	0	0.0057
mef2/68	M4824_1.02	cisbp_motifs	0.0038	0.0045	0.0057
mef2/68	M4767_1.02	cisbp_motifs	0.006	0.0113	0.0086
mef2/68	M4803_1.02	cisbp_motifs	0.0031	0.0023	0.0086
mef2/68	M4913_1.02	cisbp_motifs	0.0027	0.0023	0
mef2/68	M5185_1.02	cisbp_motifs	0.0018	0	0.0029
mef2/68	M4892_1.02	cisbp_motifs	0.0036	0	0.0029
mef2/68	M5189_1.02	cisbp_motifs	9.00E-04	0.0023	0.0029
mef2/68	M4952_1.02	cisbp_motifs	0.0022	0.0023	0.0115
mef2/68	M4735_1.02	cisbp_motifs	0.0029	0	0.0086
mef2/68	M5022_1.02	cisbp_motifs	0.0022	0.0023	0.0115
mef2/68	M4750_1.02	cisbp_motifs	0.0022	0	0.0029
mef2/68	M5103_1.02	cisbp_motifs	0.0038	0.0068	0
mef2/68	M4939_1.02	cisbp_motifs	0.0069	0.0045	0.0201
mef2/68	M5213_1.02	cisbp_motifs	0.0036	0.0023	0.0115
mef2/68	M0580_1.02	cisbp_motifs	0.0045	0	0.0029
mef2/68	M5348_1.02	cisbp_motifs	0.0038	0.0045	0
mef2/68	M4813_1.02	cisbp_motifs	0.0027	0.0068	0.0057
mef2/68	M5217_1.02	cisbp_motifs	0.0011	0.0045	0.0029
mef2/68	M4899_1.02	cisbp_motifs	0.0038	0.0023	0.0085
mef2/68	M5207_1.02	cisbp_motifs	0.0036	0.0045	0.0029
mef2/68	M5182_1.02	cisbp_motifs	0.0018	0.0023	0
mef2/68	M5128_1.02	cisbp_motifs	0.0013	0.0023	0.0028
mef2/68	M5121_1.02	cisbp_motifs	0.0029	0	0
mef2/68	M5051_1.02	cisbp_motifs	0.002	0	0.0029
mef2/68	M5050_1.02	cisbp_motifs	0.002	0	0.0029
mef2/68	M4911_1.02	cisbp_motifs	0.0016	0.0091	0.0057
mef2/68	M4526_1.02	cisbp_motifs	0.0022	0.0045	0
mef2/68	M1471_1.02	cisbp_motifs	0.0025	0.0045	0.0029
mef2/68	M5097_1.02	cisbp_motifs	0.0036	0	0.0115
mef2/68	M6166_1.02	cisbp_motifs	0.0027	0.0045	0.0029
mef2/68	M6410_1.02	cisbp_motifs	0.002	0.0023	0
mef2/68	M5059_1.02	cisbp_motifs	0.002	0.0045	0
mef2/68	M4966_1.02	cisbp_motifs	0.0036	0	0.0057
mef2/68	M4937_1.02	cisbp_motifs	0.0011	0.0023	0
mef2/68	M4930_1.02	cisbp_motifs	0.0018	0.0023	0
mef2/68	M4929_1.02	cisbp_motifs	0.0018	0.0023	0
mef2/68	M4840_1.02	cisbp_motifs	0.006	0.0068	0.0086
mef2/68	M1837_1.02	cisbp_motifs	0.0031	0.0068	0
mef2/68	M1095_1.02	cisbp_motifs	0.0018	0.0045	0.0057
mef2/68	M4823_1.02	cisbp_motifs	0.004	0	0
mef2/68	M5011_1.02	cisbp_motifs	0.0031	0	0.0029
mef2/68	M5029_1.02	cisbp_motifs	0.0036	0	0.0057
mef2/68	M5020_1.02	cisbp_motifs	0.0016	0.0045	0.0057
mef2/68	M2247_1.02	cisbp_motifs	0.0063	0.009	0.0144
mef2/68	M1850_1.02	cisbp_motifs	0.0016	0.0045	0.0086
mef2/68	M5099_1.02	cisbp_motifs	0.0058	0.0045	0.0057
mef2/68	M5190_1.02	cisbp_motifs	0.0038	0	0.0115
mef2/68	M5177_1.02	cisbp_motifs	0.0038	0	0.0115
mef2/68	M2249_1.02	cisbp_motifs	0.0038	0.0046	0.0057
mef2/68	M6186_1.02	cisbp_motifs	0.002	0.0023	0
mef2/68	M4673_1.02	cisbp_motifs	0.0045	0.0045	0.0143
mef2/68	M1628_1.02	cisbp_motifs	0.0034	0.0023	0.0029
mef2/68	M4924_1.02	cisbp_motifs	0.0043	0.0045	0
mef2/68	M5025_1.02	cisbp_motifs	0.002	0.0023	0.0114
mef2/68	M4949_1.02	cisbp_motifs	0.002	0.0023	0.0086
mef2/68	M0302_1.02	cisbp_motifs	0.0011	0	0
mef2/68	M4919_1.02	cisbp_motifs	0.0016	0	0
mef2/68	M4918_1.02	cisbp_motifs	0.0016	0	0
mef2/68	M4677_1.02	cisbp_motifs	0.0058	0	0.0029
mef2/68	M6374_1.02	cisbp_motifs	0.0029	0	0.0029
mef2/68	M4969_1.02	cisbp_motifs	0.0025	0	0
mef2/68	M1524_1.02	cisbp_motifs	0.0018	0	0.0057
mef2/68	M1100_1.02	cisbp_motifs	0.002	0.0045	0
mef2/68	M5272_1.02	cisbp_motifs	7.00E-04	0.0023	0.0085
mef2/68	M4896_1.02	cisbp_motifs	0.0013	0.0023	0.0057
mef2/68	M4895_1.02	cisbp_motifs	0.0013	0.0023	0.0057
mef2/68	M4747_1.02	cisbp_motifs	4.00E-04	0	0
mef2/68	M4985_1.02	cisbp_motifs	0.0031	0.0045	0.0057
mef2/68	M4669_1.02	cisbp_motifs	0.002	0	0.0086
mef2/68	M5263_1.02	cisbp_motifs	0.0027	0	0
mef2/68	M5247_1.02	cisbp_motifs	0.0083	0.0091	0.0228
mef2/68	M5234_1.02	cisbp_motifs	7.00E-04	0	0.0057
mef2/68	M5152_1.02	cisbp_motifs	0.004	0	0.0029
mef2/68	M4988_1.02	cisbp_motifs	0.0022	0.0068	0.0029
mef2/68	M4971_1.02	cisbp_motifs	0.0027	0.0023	0
mef2/68	M4794_1.02	cisbp_motifs	0.0034	0	0.0029
mef2/68	M4670_1.02	cisbp_motifs	0.0031	0	0
mef2/68	M1529_1.02	cisbp_motifs	0.0027	0	0.0029
mef2/68	M1092_1.02	cisbp_motifs	0.0025	0.0023	0.0029
mef2/68	M1089_1.02	cisbp_motifs	0.0016	0.0023	0.0028
mef2/68	M2387_1.02	cisbp_motifs	0.0013	0.0045	0
mef2/68	M5227_1.02	cisbp_motifs	0.0018	0	0.0057
mef2/68	M5187_1.02	cisbp_motifs	0.0045	0	0
mef2/68	M4914_1.02	cisbp_motifs	0.0016	0	0.0029
mef2/68	M4906_1.02	cisbp_motifs	0.002	0.0045	0.0086
mef2/68	M1631_1.02	cisbp_motifs	0.002	0.0023	0
mef2/68	M1094_1.02	cisbp_motifs	0.0016	0.0023	0
mef2/68	M6238_1.02	cisbp_motifs	0.0054	0.0068	0.0171
mef2/68	M0723_1.02	cisbp_motifs	0.0025	0.0045	0.0086
mef2/68	M5283_1.02	cisbp_motifs	0.0029	0.0023	0.0057
mef2/68	M4869_1.02	cisbp_motifs	9.00E-04	0.0023	0
mef2/68	M4800_1.02	cisbp_motifs	0.002	0.0023	0.0057
mef2/68	M0319_1.02	cisbp_motifs	7.00E-04	0	0.0028
mef2/68	M2251_1.02	cisbp_motifs	7.00E-04	0	0.0057
mef2/68	M1097_1.02	cisbp_motifs	0.0011	0.0045	0
mef2/68	M5047_1.02	cisbp_motifs	0.0128	0.0158	0.0115
mef2/68	M5009_1.02	cisbp_motifs	0.0036	0	0.0114
mef2/68	M0576_1.02	cisbp_motifs	0.0029	0	0
mef2/68	M4765_1.02	cisbp_motifs	0.0018	0.0023	0.0057
mef2/68	M5060_1.02	cisbp_motifs	0.0022	0	0.0029
mef2/68	M4926_1.02	cisbp_motifs	0.0025	0.0023	0.0029
mef2/68	M1519_1.02	cisbp_motifs	0.0031	0.0045	0.0057
mef2/68	M4882_1.02	cisbp_motifs	0.0011	0.0023	0
mef2/68	M1849_1.02	cisbp_motifs	0.0063	0.0068	0.0115
mef2/68	M5256_1.02	cisbp_motifs	0.0022	0.0023	0.0057
mef2/68	M5142_1.02	cisbp_motifs	0.0034	0.0068	0
mef2/68	M5024_1.02	cisbp_motifs	0.0018	0	0.0057
mef2/68	M5019_1.02	cisbp_motifs	0.002	0	0.0085
mef2/68	M5224_1.02	cisbp_motifs	0.0011	0	0
mef2/68	M5159_1.02	cisbp_motifs	0.0018	0	0.0057
mef2/68	M4996_1.02	cisbp_motifs	0.0034	0.0046	0.0057
mef2/68	M4954_1.02	cisbp_motifs	0.0016	0.0023	0.0029
mef2/68	M5704_1.02	cisbp_motifs	7.00E-04	0.0023	0.0057
mef2/68	M4708_1.02	cisbp_motifs	0.0034	0.0091	0.0086
mef2/68	M0740_1.02	cisbp_motifs	0.0034	0.0068	0.0029
mef2/68	M0737_1.02	cisbp_motifs	0.0027	0.0023	0.0085
mef2/68	M0641_1.02	cisbp_motifs	0.0016	0.0023	0.0057
mef2/68	M1088_1.02	cisbp_motifs	0.0011	0.0023	0
mef2/68	M1102_1.02	cisbp_motifs	0.0018	0.0023	0
mef2/68	M5233_1.02	cisbp_motifs	4.00E-04	0	0.0029
mef2/68	M5157_1.02	cisbp_motifs	0.002	0	0.0029
mef2/68	M5116_1.02	cisbp_motifs	0.0025	0	0.0086
mef2/68	M5004_1.02	cisbp_motifs	0.002	0.0023	0
mef2/68	M4953_1.02	cisbp_motifs	0.0022	0.0023	0.0086
mef2/68	M4831_1.02	cisbp_motifs	0.0016	0	0.0029
mef2/68	M4817_1.02	cisbp_motifs	0.0016	0	0.0086
mef2/68	M4739_1.02	cisbp_motifs	0.0025	0	0.0057
mef2/68	M4676_1.02	cisbp_motifs	0.004	0.0068	0.0057
mef2/68	M1093_1.02	cisbp_motifs	0.0013	0	0
mef2/68	M1091_1.02	cisbp_motifs	0.002	0.0046	0
mef2/68	M4757_1.02	cisbp_motifs	0.0065	0.0023	0.02
mef2/68	M6394_1.02	cisbp_motifs	0.002	0	0.0085
mef2/68	M5173_1.02	cisbp_motifs	0.0016	0.009	0.0029
mef2/68	M5172_1.02	cisbp_motifs	0.0016	0.009	0.0029
mef2/68	M4921_1.02	cisbp_motifs	0.0016	0.0045	0.0029
mef2/68	M4902_1.02	cisbp_motifs	0.0011	0	0.0029
mef2/68	M4808_1.02	cisbp_motifs	0.0031	0.0045	0.0057
mef2/68	M1599_1.02	cisbp_motifs	0.0025	0.0023	0.0086
mef2/68	M1099_1.02	cisbp_motifs	0.0011	0.0023	0.0057
mef2/68	M5280_1.02	cisbp_motifs	0.0011	0.0045	0
mef2/68	M5052_1.02	cisbp_motifs	0.0027	0.0023	0.0057
mef2/68	M2060_1.02	cisbp_motifs	0.0018	0.0068	0
mef2/68	M1946_1.02	cisbp_motifs	4.00E-04	0	0.0029
mef2/68	M4783_1.02	cisbp_motifs	0.0022	0	0.0057
mef2/68	M4770_1.02	cisbp_motifs	0.0043	0	0.0029
mef2/68	M4728_1.02	cisbp_motifs	0.0031	0	0.0057
mef2/68	M5023_1.02	cisbp_motifs	0.0022	0.0045	0.0057
mef2/68	M4830_1.02	cisbp_motifs	0.0027	0.0068	0.0086
mef2/68	M4973_1.02	cisbp_motifs	0.0029	0.0045	0.0029
mef2/68	M4923_1.02	cisbp_motifs	0.0013	0.0045	0
mef2/68	M4859_1.02	cisbp_motifs	0.0027	0.0045	0.0086
mef2/68	M2263_1.02	cisbp_motifs	9.00E-04	0.0045	0
mef2/68	M5180_1.02	cisbp_motifs	7.00E-04	0	0
mef2/68	M5167_1.02	cisbp_motifs	0.0049	0.0045	0.0057
mef2/68	M4901_1.02	cisbp_motifs	0.0013	0.0023	0.0057
mef2/68	M1090_1.02	cisbp_motifs	0.0016	0.0023	0
mef2/68	M4883_1.02	cisbp_motifs	9.00E-04	0.0023	0
mef2/68	M6237_1.02	cisbp_motifs	0.0076	0.0045	0.0143
mef2/68	M5043_1.02	cisbp_motifs	9.00E-04	0.0023	0
mef2/68	M1101_1.02	cisbp_motifs	0.0016	0.0068	0.0029
mef2/68	M4857_1.02	cisbp_motifs	0.0013	0.0023	0.0057
mef2/68	M4829_1.02	cisbp_motifs	7.00E-04	0	0
mef2/68	M0817_1.02	cisbp_motifs	0.0018	0.0023	0
mef2/68	M5113_1.02	cisbp_motifs	0.0018	0	0.0029
mef2/68	M5104_1.02	cisbp_motifs	4.00E-04	0	0
mef2/68	M1469_1.02	cisbp_motifs	7.00E-04	0.0023	0.0029
mef2/68	M5265_1.02	cisbp_motifs	9.00E-04	0	0
mef2/68	M5179_1.02	cisbp_motifs	0.0025	0	0.0057
mef2/68	M4951_1.02	cisbp_motifs	0.0013	0	0.0029
mef2/68	M4894_1.02	cisbp_motifs	0.0011	0	0
mef2/68	M4893_1.02	cisbp_motifs	0.0011	0	0
mef2/68	M4769_1.02	cisbp_motifs	0.002	0	0.0029
mef2/68	M4725_1.02	cisbp_motifs	0.0025	0.0023	0.0029
mef2/68	M4724_1.02	cisbp_motifs	0.0025	0.0023	0.0029
mef2/68	M0713_1.02	cisbp_motifs	0.0016	0	0.0057
mef2/68	M1470_1.02	cisbp_motifs	0.0018	0	0.0029
mef2/68	M5108_1.02	cisbp_motifs	4.00E-04	0	0
mef2/68	M5107_1.02	cisbp_motifs	4.00E-04	0	0
mef2/68	M4933_1.02	cisbp_motifs	0.0018	0	0
mef2/68	M4787_1.02	cisbp_motifs	0.0031	0	0.0029
mef2/68	M5241_1.02	cisbp_motifs	0.0016	0.0045	0.0057
mef2/68	M5036_1.02	cisbp_motifs	0.0013	0	0
mef2/68	M4947_1.02	cisbp_motifs	0.0016	0.0023	0
mef2/68	M4891_1.02	cisbp_motifs	0.0013	0	0
mef2/68	M1623_1.02	cisbp_motifs	0.0018	0	0
mef2/68	M1098_1.02	cisbp_motifs	0.0011	0	0.0029
mef2/68	M1096_1.02	cisbp_motifs	0.0011	0	0.0057
mef2/68	M0135_1.02	cisbp_motifs	0.0054	0	0.0029
mef2/68	M5194_1.02	cisbp_motifs	0.0016	0.0046	0.0028
mef2/68	M4878_1.02	cisbp_motifs	0.002	0.0045	0
mef2/68	M4847_1.02	cisbp_motifs	0.0011	0	0.0029
mef2/68	M4826_1.02	cisbp_motifs	0.0013	0	0.0028
mef2/68	M1960_1.02	cisbp_motifs	0.002	0.0023	0.0029
mef2/68	M5144_1.02	cisbp_motifs	0.0025	0.0068	0.0057
mef2/68	M4982_1.02	cisbp_motifs	0.0016	0.0023	0
mef2/68	M4931_1.02	cisbp_motifs	7.00E-04	0	0
mef2/68	M4730_1.02	cisbp_motifs	0.0036	0.0136	0.0115
mef2/68	M1104_1.02	cisbp_motifs	0.0018	0.0023	0
mef2/68	M0967_1.02	cisbp_motifs	0.0018	0.0023	0
mef2/68	M4843_1.02	cisbp_motifs	0.0027	0.0091	0.0086
mef2/68	M5208_1.02	cisbp_motifs	7.00E-04	0	0
mef2/68	M5199_1.02	cisbp_motifs	0.0013	0.0045	0
mef2/68	M0736_1.02	cisbp_motifs	0.004	0	0.0029
mef2/68	M0111_1.02	cisbp_motifs	0.0025	0.0023	0
mef2/68	M4872_1.02	cisbp_motifs	0.0043	0.0023	0.0057
mef2/68	M5252_1.02	cisbp_motifs	7.00E-04	0.0023	0
mef2/68	M5174_1.02	cisbp_motifs	0.0011	0.0023	0.0029
mef2/68	M4977_1.02	cisbp_motifs	9.00E-04	0.0023	0.0029
mef2/68	M4964_1.02	cisbp_motifs	0.0027	0.0045	0.0029
mef2/68	M4820_1.02	cisbp_motifs	0	0	0.0029
mef2/68	M4788_1.02	cisbp_motifs	9.00E-04	0.0023	0.0057
mef2/68	M4743_1.02	cisbp_motifs	0.0054	0.0045	0.0057
mef2/68	M4720_1.02	cisbp_motifs	0.0016	0.0045	0
mef2/68	M1869_1.02	cisbp_motifs	9.00E-04	0.0023	0
mef2/68	M5273_1.02	cisbp_motifs	0.0013	0	0.0029
mef2/68	M5101_1.02	cisbp_motifs	4.00E-04	0	0
mef2/68	M5064_1.02	cisbp_motifs	0.0013	0	0.0029
mef2/68	M4745_1.02	cisbp_motifs	0.0013	0	0.0029
mef2/68	M5081_1.02	cisbp_motifs	0.0011	0	0
mef2/68	M1858_1.02	cisbp_motifs	0.0011	0	0.0057
mef2/68	M4675_1.02	cisbp_motifs	9.00E-04	0.0023	0.0199
mef2/68	M0596_1.02	cisbp_motifs	0.0036	0.0023	0.0057
mef2/68	M5196_1.02	cisbp_motifs	0.0016	0.0045	0
mef2/68	M4863_1.02	cisbp_motifs	0.0016	0.0023	0
mef2/68	M2006_1.02	cisbp_motifs	0.0034	0.0068	0.0029
mef2/68	M1242_1.02	cisbp_motifs	9.00E-04	0.0023	0
mef2/68	M1223_1.02	cisbp_motifs	0.0013	0.0045	0
mef2/68	M1105_1.02	cisbp_motifs	0.0011	0.0023	0
mef2/68	M1103_1.02	cisbp_motifs	0.0013	0.0023	0.0057
mef2/68	M5109_1.02	cisbp_motifs	0.0058	0.0045	0.0086
mef2/68	M2037_1.02	cisbp_motifs	0.0013	0	0.0029
mef2/68	M2031_1.02	cisbp_motifs	9.00E-04	0.0023	0.0029
mef2/68	M2002_1.02	cisbp_motifs	0.0018	0	0
mef2/68	M5111_1.02	cisbp_motifs	9.00E-04	0	0
mef2/68	M4948_1.02	cisbp_motifs	0.0013	0	0.0029
mef2/68	M5147_1.02	cisbp_motifs	2.00E-04	0.0023	0
mef2/68	M5164_1.02	cisbp_motifs	0.0034	0.0068	0.0029
mef2/68	M5137_1.02	cisbp_motifs	0.0036	0.0045	0.0029
mef2/68	M5007_1.02	cisbp_motifs	0.0034	0.0068	0.0029
mef2/68	M4997_1.02	cisbp_motifs	0.009	0.0023	0.0201
mef2/68	M4790_1.02	cisbp_motifs	0.0029	0.0023	0.0029
mef2/68	M1992_1.02	cisbp_motifs	0.0036	0.0045	0.0029
mef2/68	M1918_1.02	cisbp_motifs	0.0038	0.0045	0.0029
mef2/68	M1106_1.02	cisbp_motifs	0.0011	0.0023	0.0086
mef2/68	M5221_1.02	cisbp_motifs	0.0011	0	0
mef2/68	M5034_1.02	cisbp_motifs	0.0011	0	0
mef2/68	M4809_1.02	cisbp_motifs	0.0022	0.0023	0
mef2/68	M5119_1.02	cisbp_motifs	7.00E-04	0.0023	0.0057
mef2/68	M4983_1.02	cisbp_motifs	0.0025	0.0023	0.0029
mef2/68	M2046_1.02	cisbp_motifs	7.00E-04	0.0023	0
mef2/68	M2029_1.02	cisbp_motifs	0.0018	0	0.0057
mef2/1012	M5065_1.02	cisbp_motifs	0.018	0.0225	0.0228
mef2/1012	M4876_1.02	cisbp_motifs	0.0167	0.0247	0.0203
mef2/1012	M2328_1.02	cisbp_motifs	0.0069	0.0045	0.0178
mef2/1012	M4898_1.02	cisbp_motifs	0.0159	0.0157	0.0203
mef2/1012	M4870_1.02	cisbp_motifs	0.0106	0.009	0.0076
mef2/1012	M5215_1.02	cisbp_motifs	0.0184	0.018	0.0253
mef2/1012	M6501_1.02	cisbp_motifs	0.0071	0.009	0.0051
mef2/1012	M2325_1.02	cisbp_motifs	0.0063	0.0113	0.0076
mef2/1012	M5151_1.02	cisbp_motifs	0.0025	0.0045	0
mef2/1012	M5048_1.02	cisbp_motifs	0.029	0.018	0.033
mef2/1012	M5030_1.02	cisbp_motifs	0.0031	0.0067	0.0051
mef2/1012	M4885_1.02	cisbp_motifs	0.0035	0.0023	0.0025
mef2/1012	M2327_1.02	cisbp_motifs	0.0031	0.0045	0.0051
mef2/1012	M5148_1.02	cisbp_motifs	0.0031	0	0.0051
mef2/1012	M4880_1.02	cisbp_motifs	0.0043	0.0045	0.0127
mef2/1012	M1912_1.02	cisbp_motifs	0.0035	0.0135	0.0101
mef2/1012	M5003_1.02	cisbp_motifs	0.0033	0.0022	0.0102
mef2/1012	M5211_1.02	cisbp_motifs	0.0292	0.0202	0.0279
mef2/1012	M6459_1.02	cisbp_motifs	0.0076	0.0113	0.0025
mef2/1012	M5006_1.02	cisbp_motifs	0.0059	0.0113	0
mef2/1012	M4850_1.02	cisbp_motifs	0.008	0.0135	0.0127
mef2/1012	M6235_1.02	cisbp_motifs	0.0035	0.0045	0.0126
mef2/1012	M4860_1.02	cisbp_motifs	0.0035	0.0045	0.0025
mef2/1012	M5037_1.02	cisbp_motifs	0.0043	0	0
mef2/1012	M5203_1.02	cisbp_motifs	0.0024	0.0023	0.0025
mef2/1012	M4672_1.02	cisbp_motifs	0.0067	0.0045	0.0076
mef2/1012	M5168_1.02	cisbp_motifs	0.0268	0.0248	0.0354
mef2/1012	M4866_1.02	cisbp_motifs	0.0041	0	0.0025
mef2/1012	M5102_1.02	cisbp_motifs	0.0063	0.0045	0.0051
mef2/1012	M4889_1.02	cisbp_motifs	0.0073	0.0067	0.0051
mef2/1012	M5186_1.02	cisbp_motifs	0.0037	0.009	0.0051
mef2/1012	M4912_1.02	cisbp_motifs	0.0033	0	0.0101
mef2/1012	M5158_1.02	cisbp_motifs	0.0025	0	0.0076
mef2/1012	M4934_1.02	cisbp_motifs	0.0041	0.0089	0.0026
mef2/1012	M4674_1.02	cisbp_motifs	0.0029	0	0.0025
mef2/1012	M5079_1.02	cisbp_motifs	0.008	0.0113	0.0203
mef2/1012	M4842_1.02	cisbp_motifs	0.0033	0.0023	0.0076
mef2/1012	M2259_1.02	cisbp_motifs	0.0073	0.0113	0.0101
mef2/1012	M5219_1.02	cisbp_motifs	0.0043	0.0045	0.0126
mef2/1012	M1890_1.02	cisbp_motifs	0.0039	0.0068	0.0025
mef2/1012	M4722_1.02	cisbp_motifs	0.0047	0.0068	0.0076
mef2/1012	M5244_1.02	cisbp_motifs	0.0033	0	0.0025
mef2/1012	M4865_1.02	cisbp_motifs	0.0082	0.009	0.0152
mef2/1012	M5222_1.02	cisbp_motifs	0.0022	0.0022	0.0076
mef2/1012	M5660_1.02	cisbp_motifs	0.0043	0.0022	0.0076
mef2/1012	M4900_1.02	cisbp_motifs	0.002	0	0.0025
mef2/1012	M4867_1.02	cisbp_motifs	0.0045	0.0135	0.0025
mef2/1012	M5039_1.02	cisbp_motifs	0.0024	0.0045	0.005
mef2/1012	M5035_1.02	cisbp_motifs	0.0043	0.0068	0
mef2/1012	M4873_1.02	cisbp_motifs	0.0027	0.0067	0.0051
mef2/1012	M5209_1.02	cisbp_motifs	0.0069	0.0067	0.0102
mef2/1012	M4824_1.02	cisbp_motifs	0.0045	0.0045	0
mef2/1012	M4802_1.02	cisbp_motifs	0.001	0	0.0026
mef2/1012	M4897_1.02	cisbp_motifs	0.002	0.0045	0
mef2/1012	M4927_1.02	cisbp_motifs	0.0045	0	0.0025
mef2/1012	M6277_1.02	cisbp_motifs	0.0012	0.0022	0.0025
mef2/1012	M4633_1.02	cisbp_motifs	0.0022	0.0045	0.0127
mef2/1012	M4879_1.02	cisbp_motifs	0.0025	0.0022	0.0051
mef2/1012	M4748_1.02	cisbp_motifs	0.0037	0.0045	0.0025
mef2/1012	M6166_1.02	cisbp_motifs	0.0022	0	0.0051
mef2/1012	M4837_1.02	cisbp_motifs	0.0084	0.0112	0.0051
mef2/1012	M1854_1.02	cisbp_motifs	0.0039	0.0135	0.0076
mef2/1012	M5348_1.02	cisbp_motifs	0.0035	0.0045	0.0025
mef2/1012	M5054_1.02	cisbp_motifs	0.0127	0.0157	0.0203
mef2/1012	M4922_1.02	cisbp_motifs	0.0033	0.0022	0
mef2/1012	M6537_1.02	cisbp_motifs	0.0025	0.0135	0.0025
mef2/1012	M5018_1.02	cisbp_motifs	0.0027	0.0022	0.0026
mef2/1012	M4811_1.02	cisbp_motifs	0.0074	0.0068	0.0126
mef2/1012	M4767_1.02	cisbp_motifs	0.0067	0.0045	0.0127
mef2/1012	M4803_1.02	cisbp_motifs	0.0031	0.0022	0.0076
mef2/1012	M4526_1.02	cisbp_motifs	0.0029	0.0023	0.0051
mef2/1012	M4913_1.02	cisbp_motifs	0.0024	0.0045	0.0025
mef2/1012	M5185_1.02	cisbp_motifs	0.0027	0	0
mef2/1012	M4735_1.02	cisbp_motifs	0.0025	0.0022	0.0025
mef2/1012	M4823_1.02	cisbp_motifs	0.0018	0.0045	0.0025
mef2/1012	M4750_1.02	cisbp_motifs	0.0025	0.0022	0.0051
mef2/1012	M5189_1.02	cisbp_motifs	0.0022	0.0045	0.0051
mef2/1012	M4952_1.02	cisbp_motifs	0.0014	0	0.0025
mef2/1012	M4892_1.02	cisbp_motifs	0.0041	0.0067	0.0076
mef2/1012	M5022_1.02	cisbp_motifs	0.0033	0.0022	0.0025
mef2/1012	M5103_1.02	cisbp_motifs	0.0033	0.0022	0.0076
mef2/1012	M4819_1.02	cisbp_motifs	0.0041	0.0067	0
mef2/1012	M5213_1.02	cisbp_motifs	0.0031	0.0045	0.0051
mef2/1012	M4939_1.02	cisbp_motifs	0.0065	0.009	0.0127
mef2/1012	M0580_1.02	cisbp_motifs	0.0029	0.0068	0.0101
mef2/1012	M4813_1.02	cisbp_motifs	0.0025	0.0045	0.0025
mef2/1012	M5217_1.02	cisbp_motifs	0.0022	0.0045	0
mef2/1012	M5207_1.02	cisbp_motifs	0.0024	0.0045	0.0076
mef2/1012	M5128_1.02	cisbp_motifs	0.0012	0.0022	0
mef2/1012	M5051_1.02	cisbp_motifs	0.0018	0.0023	0
mef2/1012	M5050_1.02	cisbp_motifs	0.0018	0.0023	0
mef2/1012	M5182_1.02	cisbp_motifs	0.0035	0.0022	0.0051
mef2/1012	M4899_1.02	cisbp_motifs	0.0041	0.0045	0.0051
mef2/1012	M4911_1.02	cisbp_motifs	0.0016	0.0023	0.0025
mef2/1012	M5097_1.02	cisbp_motifs	0.0047	0.0045	0.0025
mef2/1012	M5121_1.02	cisbp_motifs	0.0025	0.0022	0.0051
mef2/1012	M5059_1.02	cisbp_motifs	0.0016	0	0.0051
mef2/1012	M4966_1.02	cisbp_motifs	0.0031	0.0023	0
mef2/1012	M4937_1.02	cisbp_motifs	0.0024	0.0067	0.0025
mef2/1012	M4930_1.02	cisbp_motifs	0.001	0.0023	0
mef2/1012	M4929_1.02	cisbp_motifs	0.001	0.0023	0
mef2/1012	M4840_1.02	cisbp_motifs	0.0067	0	0.0102
mef2/1012	M1837_1.02	cisbp_motifs	0.0035	0.0045	0.0025
mef2/1012	M1095_1.02	cisbp_motifs	0.0025	0.0022	0
mef2/1012	M6410_1.02	cisbp_motifs	0.0018	0.0023	0.0051
mef2/1012	M5029_1.02	cisbp_motifs	0.0024	0.0045	0
mef2/1012	M5020_1.02	cisbp_motifs	0.0014	0	0
mef2/1012	M5011_1.02	cisbp_motifs	0.0039	0	0.0025
mef2/1012	M2247_1.02	cisbp_motifs	0.0065	0.0045	0.0127
mef2/1012	M1850_1.02	cisbp_motifs	0.001	0.0067	0.0025
mef2/1012	M5099_1.02	cisbp_motifs	0.0063	0.0022	0.0127
mef2/1012	M6186_1.02	cisbp_motifs	0.002	0.0045	0
mef2/1012	M5190_1.02	cisbp_motifs	0.0043	0.009	0.0025
mef2/1012	M5177_1.02	cisbp_motifs	0.0043	0.009	0.0025
mef2/1012	M4673_1.02	cisbp_motifs	0.0037	0.009	0.0076
mef2/1012	M2249_1.02	cisbp_motifs	0.0035	0	0.0076
mef2/1012	M1628_1.02	cisbp_motifs	0.0037	0.009	0
mef2/1012	M1471_1.02	cisbp_motifs	0.0025	0.0022	0
mef2/1012	M4924_1.02	cisbp_motifs	0.0033	0.0045	0
mef2/1012	M6374_1.02	cisbp_motifs	0.0033	0.0023	0.0025
mef2/1012	M4919_1.02	cisbp_motifs	0.0018	0.0023	0
mef2/1012	M4918_1.02	cisbp_motifs	0.0018	0.0023	0
mef2/1012	M5025_1.02	cisbp_motifs	0.0033	0.0022	0
mef2/1012	M4969_1.02	cisbp_motifs	0.0037	0.0023	0.0051
mef2/1012	M4949_1.02	cisbp_motifs	0.0024	0.0022	0
mef2/1012	M4677_1.02	cisbp_motifs	0.0022	0.0045	0.0101
mef2/1012	M1524_1.02	cisbp_motifs	0.0018	0	0.0025
mef2/1012	M1100_1.02	cisbp_motifs	0.002	0.0022	0.0025
mef2/1012	M0302_1.02	cisbp_motifs	0.0016	0	0
mef2/1012	M5272_1.02	cisbp_motifs	0.0012	0.0022	0
mef2/1012	M4896_1.02	cisbp_motifs	0.0014	0.0045	0
mef2/1012	M4895_1.02	cisbp_motifs	0.0014	0.0045	0
mef2/1012	M4747_1.02	cisbp_motifs	0.0014	0	0
mef2/1012	M4985_1.02	cisbp_motifs	0.0033	0.0045	0.0025
mef2/1012	M1092_1.02	cisbp_motifs	0.0014	0.0045	0
mef2/1012	M5263_1.02	cisbp_motifs	0.0012	0	0
mef2/1012	M5247_1.02	cisbp_motifs	0.0106	0.0068	0.0076
mef2/1012	M5234_1.02	cisbp_motifs	0.0025	0.0045	0
mef2/1012	M5152_1.02	cisbp_motifs	0.0029	0.0112	0.0051
mef2/1012	M4988_1.02	cisbp_motifs	0.0035	0.0067	0.0025
mef2/1012	M4971_1.02	cisbp_motifs	0.0029	0.0068	0
mef2/1012	M4794_1.02	cisbp_motifs	0.0035	0.0023	0.0025
mef2/1012	M4670_1.02	cisbp_motifs	0.0035	0.0045	0.0076
mef2/1012	M1529_1.02	cisbp_motifs	0.0029	0	0.0076
mef2/1012	M1089_1.02	cisbp_motifs	0.0018	0.0045	0.0101
mef2/1012	M4669_1.02	cisbp_motifs	0.002	0.0022	0.0026
mef2/1012	M2387_1.02	cisbp_motifs	0.0024	0	0
mef2/1012	M5227_1.02	cisbp_motifs	0.0022	0.0022	0
mef2/1012	M5187_1.02	cisbp_motifs	0.0031	0	0
mef2/1012	M4914_1.02	cisbp_motifs	0.0016	0	0.0051
mef2/1012	M1631_1.02	cisbp_motifs	0.0016	0.0045	0
mef2/1012	M1094_1.02	cisbp_motifs	0.001	0	0
mef2/1012	M4906_1.02	cisbp_motifs	0.0022	0	0
mef2/1012	M6238_1.02	cisbp_motifs	0.0063	0.0045	0.0227
mef2/1012	M4800_1.02	cisbp_motifs	0.0018	0.0023	0.0051
mef2/1012	M5283_1.02	cisbp_motifs	0.002	0.0045	0.0076
mef2/1012	M4869_1.02	cisbp_motifs	0.0025	0	0.0025
mef2/1012	M2251_1.02	cisbp_motifs	2.00E-04	0	0
mef2/1012	M1097_1.02	cisbp_motifs	0.001	0.0022	0
mef2/1012	M0723_1.02	cisbp_motifs	0.0022	0	0.0051
mef2/1012	M0319_1.02	cisbp_motifs	0.0012	0	0
mef2/1012	M5047_1.02	cisbp_motifs	0.0135	0.0135	0.0253
mef2/1012	M5009_1.02	cisbp_motifs	0.0033	0.0045	0.0025
mef2/1012	M0576_1.02	cisbp_motifs	0.002	0	0.0076
mef2/1012	M4765_1.02	cisbp_motifs	0.001	0.0023	0.0025
mef2/1012	M5060_1.02	cisbp_motifs	0.0016	0.0023	0.0025
mef2/1012	M4926_1.02	cisbp_motifs	0.002	0.0067	0
mef2/1012	M4882_1.02	cisbp_motifs	8.00E-04	0	0.0025
mef2/1012	M1849_1.02	cisbp_motifs	0.0088	0.0135	0.0203
mef2/1012	M1519_1.02	cisbp_motifs	0.0047	0.0067	0.0102
mef2/1012	M1088_1.02	cisbp_motifs	0.001	0.0022	0.0025
mef2/1012	M5256_1.02	cisbp_motifs	0.002	0	0
mef2/1012	M5224_1.02	cisbp_motifs	0.0016	0.0045	0
mef2/1012	M4996_1.02	cisbp_motifs	0.0037	0.0023	0.0051
mef2/1012	M5159_1.02	cisbp_motifs	0.0024	0	0.0051
mef2/1012	M5142_1.02	cisbp_motifs	0.0031	0.0045	0.0025
mef2/1012	M5024_1.02	cisbp_motifs	0.0022	0	0
mef2/1012	M5019_1.02	cisbp_motifs	0.0029	0	0
mef2/1012	M4954_1.02	cisbp_motifs	0.0012	0	0
mef2/1012	M5704_1.02	cisbp_motifs	4.00E-04	0.0068	0
mef2/1012	M4708_1.02	cisbp_motifs	0.0037	0.0045	0.0127
mef2/1012	M0740_1.02	cisbp_motifs	0.0035	0	0.0101
mef2/1012	M0737_1.02	cisbp_motifs	0.0025	0.0023	0.0101
mef2/1012	M0641_1.02	cisbp_motifs	0.0027	0	0.0025
mef2/1012	M5233_1.02	cisbp_motifs	6.00E-04	0	0
mef2/1012	M4676_1.02	cisbp_motifs	0.0061	0	0.0076
mef2/1012	M5116_1.02	cisbp_motifs	0.0027	0.0022	0.0025
mef2/1012	M5004_1.02	cisbp_motifs	0.0016	0	0
mef2/1012	M4831_1.02	cisbp_motifs	0.0016	0.0045	0
mef2/1012	M4817_1.02	cisbp_motifs	0.0016	0.0022	0.0102
mef2/1012	M1102_1.02	cisbp_motifs	0.0022	0.0045	0.0025
mef2/1012	M1093_1.02	cisbp_motifs	0.001	0	0.0051
mef2/1012	M1091_1.02	cisbp_motifs	0.0016	0	0.0025
mef2/1012	M5157_1.02	cisbp_motifs	0.001	0	0
mef2/1012	M4953_1.02	cisbp_motifs	8.00E-04	0.0023	0
mef2/1012	M4739_1.02	cisbp_motifs	0.0012	0.0022	0
mef2/1012	M4757_1.02	cisbp_motifs	0.0065	0.0045	0.0077
mef2/1012	M2060_1.02	cisbp_motifs	0.0018	0	0.0025
mef2/1012	M6394_1.02	cisbp_motifs	0.0018	0	0.0051
mef2/1012	M5280_1.02	cisbp_motifs	0.001	0.0023	0
mef2/1012	M5173_1.02	cisbp_motifs	0.0022	0.0022	0.0051
mef2/1012	M5172_1.02	cisbp_motifs	0.0022	0.0022	0.0051
mef2/1012	M5052_1.02	cisbp_motifs	0.0025	0.0023	0.0051
mef2/1012	M4921_1.02	cisbp_motifs	0.0024	0.0068	0.0025
mef2/1012	M4902_1.02	cisbp_motifs	0.0016	0	0
mef2/1012	M4808_1.02	cisbp_motifs	0.0051	0.0045	0.0076
mef2/1012	M1599_1.02	cisbp_motifs	0.002	0.0023	0.0025
mef2/1012	M1099_1.02	cisbp_motifs	0.0012	0	0.0025
mef2/1012	M5023_1.02	cisbp_motifs	0.0025	0.0022	0.0025
mef2/1012	M4783_1.02	cisbp_motifs	0.0025	0	0.0025
mef2/1012	M4770_1.02	cisbp_motifs	0.0035	0.0023	0.0025
mef2/1012	M4728_1.02	cisbp_motifs	0.0043	0	0.0025
mef2/1012	M5180_1.02	cisbp_motifs	0.0014	0	0
mef2/1012	M5167_1.02	cisbp_motifs	0.0063	0.0022	0.0051
mef2/1012	M4973_1.02	cisbp_motifs	0.0033	0.0045	0.0025
mef2/1012	M4923_1.02	cisbp_motifs	0.0016	0	0.0025
mef2/1012	M4901_1.02	cisbp_motifs	0.002	0.0022	0.0025
mef2/1012	M4859_1.02	cisbp_motifs	0.0035	0.0045	0.0076
mef2/1012	M4830_1.02	cisbp_motifs	0.0027	0	0.0076
mef2/1012	M2263_1.02	cisbp_motifs	0.0014	0	0
mef2/1012	M1946_1.02	cisbp_motifs	0.0014	0	0.0025
mef2/1012	M1090_1.02	cisbp_motifs	0.001	0	0
mef2/1012	M4883_1.02	cisbp_motifs	0.0014	0	0.0025
mef2/1012	M6237_1.02	cisbp_motifs	0.0071	0.0112	0.0153
mef2/1012	M5043_1.02	cisbp_motifs	0.0014	0	0.0025
mef2/1012	M1101_1.02	cisbp_motifs	0.002	0.0022	0.0025
mef2/1012	M4857_1.02	cisbp_motifs	8.00E-04	0	0
mef2/1012	M5113_1.02	cisbp_motifs	0.0016	0.0022	0.0025
mef2/1012	M5104_1.02	cisbp_motifs	0.0012	0.0023	0
mef2/1012	M4769_1.02	cisbp_motifs	0.0018	0	0
mef2/1012	M1469_1.02	cisbp_motifs	6.00E-04	0	0
mef2/1012	M5265_1.02	cisbp_motifs	8.00E-04	0.0023	0.0025
mef2/1012	M5179_1.02	cisbp_motifs	0.0014	0.0045	0
mef2/1012	M4951_1.02	cisbp_motifs	0.0014	0.0022	0.0025
mef2/1012	M4894_1.02	cisbp_motifs	0.0018	0	0
mef2/1012	M4893_1.02	cisbp_motifs	0.0018	0	0
mef2/1012	M4829_1.02	cisbp_motifs	6.00E-04	0	0
mef2/1012	M4725_1.02	cisbp_motifs	0.0016	0.0023	0
mef2/1012	M4724_1.02	cisbp_motifs	0.0016	0.0023	0
mef2/1012	M0817_1.02	cisbp_motifs	0.0025	0.0023	0
mef2/1012	M0713_1.02	cisbp_motifs	8.00E-04	0	0.0025
mef2/1012	M5241_1.02	cisbp_motifs	0.0022	0	0.0025
mef2/1012	M1623_1.02	cisbp_motifs	0.0014	0.0023	0
mef2/1012	M1470_1.02	cisbp_motifs	0.001	0	0
mef2/1012	M5108_1.02	cisbp_motifs	0.0016	0	0
mef2/1012	M5107_1.02	cisbp_motifs	0.0016	0	0
mef2/1012	M5036_1.02	cisbp_motifs	4.00E-04	0.0022	0
mef2/1012	M4947_1.02	cisbp_motifs	8.00E-04	0.0023	0.0025
mef2/1012	M4933_1.02	cisbp_motifs	8.00E-04	0	0
mef2/1012	M4891_1.02	cisbp_motifs	0.002	0.0023	0
mef2/1012	M4787_1.02	cisbp_motifs	0.0025	0.0045	0.0051
mef2/1012	M1098_1.02	cisbp_motifs	4.00E-04	0	0.0025
mef2/1012	M1096_1.02	cisbp_motifs	0.0012	0.0022	0.0025
mef2/1012	M0135_1.02	cisbp_motifs	0.0063	0.0068	0.0025
mef2/1012	M4847_1.02	cisbp_motifs	0.001	0.0022	0.0025
mef2/1012	M4826_1.02	cisbp_motifs	4.00E-04	0.0045	0.0025
mef2/1012	M1960_1.02	cisbp_motifs	0.002	0.0023	0
mef2/1012	M5194_1.02	cisbp_motifs	0.0027	0.0045	0.0051
mef2/1012	M5144_1.02	cisbp_motifs	0.0016	0	0
mef2/1012	M4982_1.02	cisbp_motifs	0.0014	0.0045	0
mef2/1012	M4931_1.02	cisbp_motifs	6.00E-04	0.0022	0.0025
mef2/1012	M4878_1.02	cisbp_motifs	0.0012	0.0023	0
mef2/1012	M4730_1.02	cisbp_motifs	0.0033	0.0023	0
mef2/1012	M1104_1.02	cisbp_motifs	0.002	0.0045	0.0025
mef2/1012	M0967_1.02	cisbp_motifs	0.002	0.0045	0.0051
mef2/1012	M4843_1.02	cisbp_motifs	0.002	0.0022	0.0102
mef2/1012	M5174_1.02	cisbp_motifs	0.0014	0.0068	0.0101
mef2/1012	M4720_1.02	cisbp_motifs	0.002	0	0.0025
mef2/1012	M5208_1.02	cisbp_motifs	0.0014	0	0.0025
mef2/1012	M5199_1.02	cisbp_motifs	8.00E-04	0	0
mef2/1012	M4977_1.02	cisbp_motifs	0.0012	0.0022	0.0025
mef2/1012	M4964_1.02	cisbp_motifs	0.0027	0	0.0051
mef2/1012	M4872_1.02	cisbp_motifs	0.0029	0.0023	0.0025
mef2/1012	M4743_1.02	cisbp_motifs	0.0031	0.0022	0.0102
mef2/1012	M1869_1.02	cisbp_motifs	8.00E-04	0	0.0025
mef2/1012	M0736_1.02	cisbp_motifs	0.0025	0.0022	0
mef2/1012	M0111_1.02	cisbp_motifs	0.0027	0.0023	0.0025
mef2/1012	M5252_1.02	cisbp_motifs	6.00E-04	0	0.0025
mef2/1012	M4820_1.02	cisbp_motifs	8.00E-04	0	0
mef2/1012	M4788_1.02	cisbp_motifs	0.0012	0.0023	0.0025
mef2/1012	M5081_1.02	cisbp_motifs	0.0016	0	0
mef2/1012	M5273_1.02	cisbp_motifs	8.00E-04	0.0023	0
mef2/1012	M5101_1.02	cisbp_motifs	0.001	0.0023	0
mef2/1012	M5064_1.02	cisbp_motifs	8.00E-04	0.0023	0
mef2/1012	M4745_1.02	cisbp_motifs	8.00E-04	0.0023	0
mef2/1012	M1858_1.02	cisbp_motifs	6.00E-04	0	0
mef2/1012	M4675_1.02	cisbp_motifs	4.00E-04	0.0023	0.0051
mef2/1012	M5196_1.02	cisbp_motifs	6.00E-04	0.0022	0.0025
mef2/1012	M5109_1.02	cisbp_motifs	0.0067	0.0022	0.0076
mef2/1012	M4863_1.02	cisbp_motifs	0.0022	0.0022	0.0025
mef2/1012	M2037_1.02	cisbp_motifs	0.0014	0	0
mef2/1012	M2006_1.02	cisbp_motifs	0.0029	0.0022	0.0102
mef2/1012	M1242_1.02	cisbp_motifs	0.0018	0	0.0025
mef2/1012	M1223_1.02	cisbp_motifs	0.0014	0.0045	0.0025
mef2/1012	M1105_1.02	cisbp_motifs	4.00E-04	0.0023	0.0051
mef2/1012	M1103_1.02	cisbp_motifs	0.0014	0	0.0025
mef2/1012	M0596_1.02	cisbp_motifs	0.0022	0.0023	0.0051
mef2/1012	M2031_1.02	cisbp_motifs	0.0022	0.0022	0.0076
mef2/1012	M5147_1.02	cisbp_motifs	0	0	0
mef2/1012	M5111_1.02	cisbp_motifs	8.00E-04	0	0
mef2/1012	M4948_1.02	cisbp_motifs	8.00E-04	0.0023	0
mef2/1012	M2002_1.02	cisbp_motifs	0.0016	0.0023	0
mef2/1012	M5164_1.02	cisbp_motifs	0.0029	0.0022	0.0102
mef2/1012	M5137_1.02	cisbp_motifs	0.0027	0	0.0102
mef2/1012	M5007_1.02	cisbp_motifs	0.0029	0.0022	0.0102
mef2/1012	M4997_1.02	cisbp_motifs	0.0084	0.0022	0.0102
mef2/1012	M4790_1.02	cisbp_motifs	0.0037	0.0045	0.0151
mef2/1012	M1992_1.02	cisbp_motifs	0.0035	0.0022	0.0102
mef2/1012	M1918_1.02	cisbp_motifs	0.0033	0	0.0102
mef2/1012	M1106_1.02	cisbp_motifs	0.0012	0.0023	0
mef2/1012	M5221_1.02	cisbp_motifs	2.00E-04	0	0
mef2/1012	M5034_1.02	cisbp_motifs	2.00E-04	0	0
mef2/1012	M4809_1.02	cisbp_motifs	0.0018	0.0022	0.0102
mef2/1012	M5119_1.02	cisbp_motifs	0.001	0	0.0025
mef2/1012	M4983_1.02	cisbp_motifs	0.002	0.0045	0.0025
mef2/1012	M2046_1.02	cisbp_motifs	6.00E-04	0	0
mef2/1012	M2029_1.02	cisbp_motifs	0.0025	0.0022	0.0051

## Sheet: README
Supplemental Table S3: Motifs enrichment at allelic imbalanced peaks
CIS-BP and selected motifs enrichment on non-significant, weakly significant and strongly significant allelic imbalanced peaks across the 6 conditions.
