# Supplementary material for: Integrating genetic variation with deep learning provides context for variants impacting transcription factor binding during embryogenesis
Source: Genome Res. 2025 May;35(5):1138–53. doi: 10.1101/gr.279652.124 (PMC12047541; doi:10.1101/gr.279652.124)
Supplement: Supplement 4 [file Supplemental_Table_S4.xlsx]

## Sheet: Sheet1
snp_id	cond1	cond2	tf1	tf2	peak_id.x	peak_id.y	dist2motif.x	dist2motif.y	peak_dist	AI.x	AI.y	top_var.x	top_var.y	same_tf
chr2R_16551959	Twi, 2-4h	CTCF, 6-8h	Twi	CTCF	chr2R_16552094_twi/24	chr2R_16552004_ctcf/68	0	45	90	0.64004919003261	0.740298447739134	TRUE	TRUE	FALSE
chr2R_16551962	Twi, 2-4h	CTCF, 6-8h	Twi	CTCF	chr2R_16552094_twi/24	chr2R_16552004_ctcf/68	0	42	90	0.653956225734709	0.725933214617193	FALSE	TRUE	FALSE
chr3L_1488661	Twi, 2-4h	CTCF, 6-8h	Twi	CTCF	chr3L_1488694_twi/24	chr3L_1488637_ctcf/68	26639	0	57	0.209517758378961	0.072742806657029	FALSE	TRUE	FALSE
chr3R_23541293	Twi, 2-4h	CTCF, 6-8h	Twi	CTCF	chr3R_23538967_twi/24	chr3R_23538974_ctcf/68	182484	0	7	0.685040868016768	0.658377009620877	FALSE	FALSE	FALSE
chr3R_23541293	Twi, 2-4h	CTCF, 6-8h	Twi	CTCF	chr3R_23538967_twi/24	chr3R_23541304_ctcf/68	182484	0	2337	0.685040868016768	0.819871518381883	FALSE	TRUE	FALSE
chr2R_15760222	Twi, 2-4h	Mef2, 6-8h	Twi	Mef2	chr2R_15762450_twi/24	chr2R_15760245_mef2/68	2128	0	2205	0.706159660881355	0.648377833904624	TRUE	TRUE	FALSE
chr2R_15762356	Twi, 2-4h	Mef2, 6-8h	Twi	Mef2	chr2R_15762450_twi/24	chr2R_15760245_mef2/68	0	2134	2205	0.322531705925062	0.357657910057483	TRUE	TRUE	FALSE
chr3L_11086207	Twi, 2-4h	Mef2, 6-8h	Twi	Mef2	chr3L_11086004_twi/24	chr3L_11085977_mef2/68	233	0	27	0.671095246645489	0.657865655007613	TRUE	TRUE	FALSE
chr3R_25591544	Twi, 2-4h	Mef2, 6-8h	Twi	Mef2	chr3R_25591682_twi/24	chr3R_25591720_mef2/68	37403	0	38	0.622644829879423	0.660928799790102	TRUE	TRUE	FALSE
chr2L_19816058	Twi, 2-4h	Bin, 6-8h	Twi	Bin	chr2L_19815775_twi/24	chr2L_19816098_bin/68	24887	0	323	0.602650004473177	0.602193254827308	FALSE	FALSE	FALSE
chr2L_19816062	Twi, 2-4h	Bin, 6-8h	Twi	Bin	chr2L_19815775_twi/24	chr2L_19816098_bin/68	24891	0	323	0.602650004473177	0.602193254827308	FALSE	FALSE	FALSE
chr3L_18460511	Twi, 2-4h	Bin, 6-8h	Twi	Bin	chr3L_18460496_twi/24	chr3L_18460477_bin/68	103793	0	19	0.62032245620103	0.334406686111521	FALSE	TRUE	FALSE
chr3R_24001482	Twi, 2-4h	Bin, 6-8h	Twi	Bin	chr3R_24001535_twi/24	chr3R_24001482_bin/68	45	0	53	0.366748451921954	0.251740417770117	TRUE	TRUE	FALSE
chr3R_24227049	Twi, 2-4h	Bin, 6-8h	Twi	Bin	chr3R_24226953_twi/24	chr3R_24226984_bin/68	263	0	31	0.606354291447111	0.604998524057857	TRUE	TRUE	FALSE
chr2R_15247252	Twi, 2-4h	Bin, 10-12h	Twi	Bin	chr2R_15248362_twi/24	chr2R_15247284_bin/1012	61717	0	1078	0.698880761265151	0.672115535227593	FALSE	FALSE	FALSE
chr2R_15339832	Twi, 2-4h	Bin, 10-12h	Twi	Bin	chr2R_15339714_twi/24	chr2R_15339739_bin/1012	129	0	25	0.392991292887856	0.369930718613213	TRUE	TRUE	FALSE
chr2R_21450589	Twi, 2-4h	Bin, 10-12h	Twi	Bin	chr2R_21450611_twi/24	chr2R_21450646_bin/1012	0	48	35	0.610152539407339	0.659920598046033	FALSE	FALSE	FALSE
chr3R_24650122	Twi, 2-4h	Bin, 10-12h	Twi	Bin	chr3R_24650115_twi/24	chr3R_24650086_bin/1012	0	62	29	0.60238260317378	0.378067143539969	TRUE	TRUE	FALSE
chr2L_20121088	CTCF, 6-8h	Mef2, 6-8h	CTCF	Mef2	chr2L_20121013_ctcf/68	chr2L_20121080_mef2/68	0	22824	67	0.659268896201628	0.611928582708618	TRUE	FALSE	FALSE
chr2R_12528759	CTCF, 6-8h	Mef2, 6-8h	CTCF	Mef2	chr2R_12528976_ctcf/68	chr2R_12529068_mef2/68	0	40853	92	0.288573321972924	0.380635839226595	TRUE	TRUE	FALSE
chr3R_13838090	CTCF, 6-8h	Mef2, 6-8h	CTCF	Mef2	chr3R_13840134_ctcf/68	chr3R_13840107_mef2/68	34289	0	27	0.267118241683703	0.379845067127902	TRUE	TRUE	FALSE
chr3R_13838093	CTCF, 6-8h	Mef2, 6-8h	CTCF	Mef2	chr3R_13840134_ctcf/68	chr3R_13840107_mef2/68	34286	0	27	0.267118241683703	0.379845067127902	TRUE	TRUE	FALSE
chr3R_25591544	CTCF, 6-8h	Mef2, 6-8h	CTCF	Mef2	chr3R_25591724_ctcf/68	chr3R_25591720_mef2/68	180	0	4	0.713951734136516	0.660928799790102	TRUE	TRUE	FALSE
chr2L_1614041	CTCF, 6-8h	Mef2, 10-12h	CTCF	Mef2	chr2L_1614157_ctcf/68	chr2L_1614149_mef2/1012	0	29988	8	0.369646747805352	0.337854181064271	TRUE	TRUE	FALSE
chr2L_20121088	CTCF, 6-8h	Mef2, 10-12h	CTCF	Mef2	chr2L_20121013_ctcf/68	chr2L_20121090_mef2/1012	0	22757	77	0.659268896201628	0.636747837128223	TRUE	FALSE	FALSE
chr2R_12528759	CTCF, 6-8h	Mef2, 10-12h	CTCF	Mef2	chr2R_12528976_ctcf/68	chr2R_12529027_mef2/1012	0	2559	51	0.288573321972924	0.371342339842422	TRUE	TRUE	FALSE
chr3L_12834178	CTCF, 6-8h	Mef2, 10-12h	CTCF	Mef2	chr3L_12834223_ctcf/68	chr3L_12832474_mef2/1012	0	5940	1749	0.202977499865478	0.398905593891408	TRUE	TRUE	FALSE
chr3L_1488661	CTCF, 6-8h	Mef2, 10-12h	CTCF	Mef2	chr3L_1488637_ctcf/68	chr3L_1488714_mef2/1012	0	13107	77	0.072742806657029	0.366945824882094	TRUE	TRUE	FALSE
chr3L_18890242	CTCF, 6-8h	Mef2, 10-12h	CTCF	Mef2	chr3L_18892156_ctcf/68	chr3L_18890312_mef2/1012	26423	0	1844	0.304194328751755	0.629150907237814	TRUE	TRUE	FALSE
chr3R_13838090	CTCF, 6-8h	Mef2, 10-12h	CTCF	Mef2	chr3R_13840134_ctcf/68	chr3R_13840118_mef2/1012	34289	0	16	0.267118241683703	0.367498508190009	TRUE	TRUE	FALSE
chr3R_13838093	CTCF, 6-8h	Mef2, 10-12h	CTCF	Mef2	chr3R_13840134_ctcf/68	chr3R_13840118_mef2/1012	34286	0	16	0.267118241683703	0.367498508190009	TRUE	TRUE	FALSE
chr3R_23159455	CTCF, 6-8h	Mef2, 10-12h	CTCF	Mef2	chr3R_23159518_ctcf/68	chr3R_23157759_mef2/1012	0	33021	1759	0.213828666030388	0.380530826202938	TRUE	FALSE	FALSE
chr2R_9971121	CTCF, 6-8h	Bin, 6-8h	CTCF	Bin	chr2R_9971122_ctcf/68	chr2R_9971346_bin/68	28098	0	224	0.604607643104808	0.392931996149566	FALSE	TRUE	FALSE
chr2R_9971387	CTCF, 6-8h	Bin, 6-8h	CTCF	Bin	chr2R_9971122_ctcf/68	chr2R_9971346_bin/68	28364	0	224	0.604607643104808	0.392931996149566	FALSE	TRUE	FALSE
chr2L_283444	CTCF, 6-8h	Bin, 10-12h	CTCF	Bin	chr2L_283230_ctcf/68	chr2L_283227_bin/1012	0	5968	3	0.649205888836038	0.628210880261899	TRUE	FALSE	FALSE
chr2L_403716	CTCF, 6-8h	Bin, 10-12h	CTCF	Bin	chr2L_403822_ctcf/68	chr2L_404027_bin/1012	0	15900	205	0.194352548330703	0.380284147074216	TRUE	TRUE	FALSE
chr2R_15339832	CTCF, 6-8h	Bin, 10-12h	CTCF	Bin	chr2R_15339750_ctcf/68	chr2R_15339739_bin/1012	126	0	11	0.39745672491981	0.369930718613213	TRUE	TRUE	FALSE
chr2L_11001223	Mef2, 6-8h	Mef2, 10-12h	Mef2	Mef2	chr2L_11001274_mef2/68	chr2L_11001284_mef2/1012	0	0	10	0.698605910155538	0.752143665683387	TRUE	TRUE	TRUE
chr2L_16526396	Mef2, 6-8h	Mef2, 10-12h	Mef2	Mef2	chr2L_16526257_mef2/68	chr2L_16526229_mef2/1012	0	0	28	0.633285759775679	0.612741857215902	TRUE	TRUE	TRUE
chr2R_14858584	Mef2, 6-8h	Mef2, 10-12h	Mef2	Mef2	chr2R_14858592_mef2/68	chr2R_14858582_mef2/1012	0	0	10	0.312802758660947	0.295265158841115	TRUE	TRUE	TRUE
chr2R_14858588	Mef2, 6-8h	Mef2, 10-12h	Mef2	Mef2	chr2R_14858592_mef2/68	chr2R_14858582_mef2/1012	0	0	10	0.321055712110799	0.311495961227787	TRUE	TRUE	TRUE
chr2R_14860739	Mef2, 6-8h	Mef2, 10-12h	Mef2	Mef2	chr2R_14858592_mef2/68	chr2R_14858582_mef2/1012	0	0	10	0.323182973896421	0.312322526640121	TRUE	TRUE	TRUE
chr2R_15955059	Mef2, 6-8h	Mef2, 10-12h	Mef2	Mef2	chr2R_15954982_mef2/68	chr2R_15954972_mef2/1012	0	0	10	0.752432694024992	0.636960340205233	TRUE	TRUE	TRUE
chr3L_12129027	Mef2, 6-8h	Mef2, 10-12h	Mef2	Mef2	chr3L_12129046_mef2/68	chr3L_12129046_mef2/1012	0	0	0	0.297487955214157	0.290477041237319	TRUE	TRUE	TRUE
chr3L_12129042	Mef2, 6-8h	Mef2, 10-12h	Mef2	Mef2	chr3L_12129046_mef2/68	chr3L_12129046_mef2/1012	0	0	0	0.211431331772258	0.156518093176364	FALSE	FALSE	TRUE
chr3L_15086805	Mef2, 6-8h	Mef2, 10-12h	Mef2	Mef2	chr3L_15086779_mef2/68	chr3L_15086772_mef2/1012	0	0	7	0.729902166881132	0.681519932129249	TRUE	TRUE	TRUE
chr3L_610290	Mef2, 6-8h	Mef2, 10-12h	Mef2	Mef2	chr3L_610414_mef2/68	chr3L_610319_mef2/1012	0	0	95	0.629825040303451	0.660525249099128	FALSE	TRUE	TRUE
chr3R_13838090	Mef2, 6-8h	Mef2, 10-12h	Mef2	Mef2	chr3R_13840107_mef2/68	chr3R_13840118_mef2/1012	0	0	11	0.379845067127902	0.367498508190009	TRUE	TRUE	TRUE
chr3R_13838093	Mef2, 6-8h	Mef2, 10-12h	Mef2	Mef2	chr3R_13840107_mef2/68	chr3R_13840118_mef2/1012	0	0	11	0.379845067127902	0.367498508190009	TRUE	TRUE	TRUE
chr3R_26105148	Mef2, 6-8h	Mef2, 10-12h	Mef2	Mef2	chr3R_26105004_mef2/68	chr3R_26103705_mef2/1012	0	45466	1299	0.726307517281374	0.640433169245852	FALSE	FALSE	TRUE
chr3R_31042970	Mef2, 6-8h	Mef2, 10-12h	Mef2	Mef2	chr3R_31042984_mef2/68	chr3R_31042979_mef2/1012	0	0	5	0.718701496312103	0.727731470724907	TRUE	TRUE	TRUE
chr3R_8689135	Mef2, 6-8h	Mef2, 10-12h	Mef2	Mef2	chr3R_8689041_mef2/68	chr3R_8689015_mef2/1012	0	0	26	0.393468611287254	0.366842007741085	TRUE	TRUE	TRUE
chr3R_9563618	Mef2, 6-8h	Mef2, 10-12h	Mef2	Mef2	chr3R_9563672_mef2/68	chr3R_9563664_mef2/1012	0	0	8	0.37023536981341	0.397838363502977	TRUE	TRUE	TRUE
chr2L_15455077	Mef2, 6-8h	Bin, 6-8h	Mef2	Bin	chr2L_15454103_mef2/68	chr2L_15455243_bin/68	986	0	1140	0.733009918378511	0.635740318687553	FALSE	FALSE	FALSE
chr2R_9971121	Mef2, 6-8h	Bin, 6-8h	Mef2	Bin	chr2R_9971128_mef2/68	chr2R_9971346_bin/68	33314	0	218	0.637296042795257	0.392931996149566	FALSE	TRUE	FALSE
chr2R_9971387	Mef2, 6-8h	Bin, 6-8h	Mef2	Bin	chr2R_9971128_mef2/68	chr2R_9971346_bin/68	33580	0	218	0.637296042795257	0.392931996149566	FALSE	TRUE	FALSE
chr3L_11086207	Mef2, 6-8h	Bin, 6-8h	Mef2	Bin	chr3L_11085977_mef2/68	chr3L_11085967_bin/68	0	3707	10	0.657865655007613	0.699709670215142	TRUE	TRUE	FALSE
chr3R_26945351	Mef2, 6-8h	Bin, 6-8h	Mef2	Bin	chr3R_26945554_mef2/68	chr3R_26945576_bin/68	0	191	22	0.337247093018338	0.37536804357818	TRUE	TRUE	FALSE
chr3R_30735345	Mef2, 6-8h	Bin, 6-8h	Mef2	Bin	chr3R_30735205_mef2/68	chr3R_30735339_bin/68	13518	0	134	0.624794079995803	0.730535241533852	TRUE	TRUE	FALSE
chr2R_15247252	Mef2, 6-8h	Bin, 10-12h	Mef2	Bin	chr2R_15247492_mef2/68	chr2R_15247284_bin/1012	31033	0	208	0.672596894109366	0.672115535227593	TRUE	FALSE	FALSE
chr3R_17054284	Mef2, 6-8h	Bin, 10-12h	Mef2	Bin	chr3R_17052759_mef2/68	chr3R_17054275_bin/1012	6471	0	1516	0.676777715756082	0.388356576452213	TRUE	FALSE	FALSE
chr3R_26103597	Mef2, 6-8h	Bin, 10-12h	Mef2	Bin	chr3R_26105004_mef2/68	chr3R_26103659_bin/1012	1286	0	1345	0.702923490394297	0.642692069975546	FALSE	TRUE	FALSE
chr3R_26105148	Mef2, 6-8h	Bin, 10-12h	Mef2	Bin	chr3R_26105004_mef2/68	chr3R_26103659_bin/1012	0	1543	1345	0.726307517281374	0.631421459591145	FALSE	FALSE	FALSE
chr3R_30735345	Mef2, 6-8h	Bin, 10-12h	Mef2	Bin	chr3R_30735205_mef2/68	chr3R_30735351_bin/1012	13518	0	146	0.624794079995803	0.704949995761432	TRUE	TRUE	FALSE
chr2L_15455077	Mef2, 10-12h	Bin, 6-8h	Mef2	Bin	chr2L_15454097_mef2/1012	chr2L_15455243_bin/68	986	0	1146	0.646096827952054	0.635740318687553	FALSE	FALSE	FALSE
chr2L_6751860	Mef2, 10-12h	Bin, 6-8h	Mef2	Bin	chr2L_6751912_mef2/1012	chr2L_6751892_bin/68	128	0	20	0.644307771256691	0.293789231071008	FALSE	TRUE	FALSE
chr3L_13213449	Mef2, 10-12h	Bin, 6-8h	Mef2	Bin	chr3L_13213684_mef2/1012	chr3L_13213403_bin/68	37525	0	281	0.652714256446954	0.696896519307152	TRUE	FALSE	FALSE
chr3R_22150564	Mef2, 10-12h	Bin, 6-8h	Mef2	Bin	chr3R_22150642_mef2/1012	chr3R_22150680_bin/68	0	216	38	0.632206308851926	0.680978790039634	FALSE	TRUE	FALSE
chr3R_22150790	Mef2, 10-12h	Bin, 6-8h	Mef2	Bin	chr3R_22150642_mef2/1012	chr3R_22150680_bin/68	218	0	38	0.628526523560768	0.631384052457747	FALSE	FALSE	FALSE
chr3R_24227049	Mef2, 10-12h	Bin, 6-8h	Mef2	Bin	chr3R_24226964_mef2/1012	chr3R_24226984_bin/68	5278	0	20	0.620604383335086	0.604998524057857	FALSE	TRUE	FALSE
chr3R_30735345	Mef2, 10-12h	Bin, 6-8h	Mef2	Bin	chr3R_30735182_mef2/1012	chr3R_30735339_bin/68	34927	0	157	0.60603646835253	0.730535241533852	FALSE	TRUE	FALSE
chr2R_15247252	Mef2, 10-12h	Bin, 10-12h	Mef2	Bin	chr2R_15246970_mef2/1012	chr2R_15247284_bin/1012	277	0	314	0.720169522582323	0.672115535227593	TRUE	FALSE	FALSE
chr2R_15339832	Mef2, 10-12h	Bin, 10-12h	Mef2	Bin	chr2R_15339745_mef2/1012	chr2R_15339739_bin/1012	67	0	6	0.352527359471804	0.369930718613213	TRUE	TRUE	FALSE
chr2R_20165616	Mef2, 10-12h	Bin, 10-12h	Mef2	Bin	chr2R_20165720_mef2/1012	chr2R_20165690_bin/1012	58757	0	30	0.381435958020116	0.32831304399548	TRUE	TRUE	FALSE
chr2R_20165756	Mef2, 10-12h	Bin, 10-12h	Mef2	Bin	chr2R_20165720_mef2/1012	chr2R_20165690_bin/1012	58897	0	30	0.618564041979884	0.671686956004521	TRUE	TRUE	FALSE
chr2R_20165760	Mef2, 10-12h	Bin, 10-12h	Mef2	Bin	chr2R_20165720_mef2/1012	chr2R_20165690_bin/1012	58901	0	30	0.643345352684548	0.668402846178698	FALSE	FALSE	FALSE
chr3L_13213449	Mef2, 10-12h	Bin, 10-12h	Mef2	Bin	chr3L_13213684_mef2/1012	chr3L_13213408_bin/1012	37525	0	276	0.652714256446954	0.712412873862411	TRUE	FALSE	FALSE
chr3L_2887735	Mef2, 10-12h	Bin, 10-12h	Mef2	Bin	chr3L_2887668_mef2/1012	chr3L_2887726_bin/1012	4	0	58	0.396520236822695	0.360164347148206	FALSE	FALSE	FALSE
chr3L_2887736	Mef2, 10-12h	Bin, 10-12h	Mef2	Bin	chr3L_2887668_mef2/1012	chr3L_2887726_bin/1012	5	0	58	0.396520236822695	0.360164347148206	FALSE	FALSE	FALSE
chr3R_22150564	Mef2, 10-12h	Bin, 10-12h	Mef2	Bin	chr3R_22150642_mef2/1012	chr3R_22150659_bin/1012	0	216	17	0.632206308851926	0.600962212048215	FALSE	FALSE	FALSE
chr3R_22150785	Mef2, 10-12h	Bin, 10-12h	Mef2	Bin	chr3R_22150642_mef2/1012	chr3R_22150659_bin/1012	213	0	17	0.368232913563147	0.375237658583091	FALSE	FALSE	FALSE
chr3R_26103597	Mef2, 10-12h	Bin, 10-12h	Mef2	Bin	chr3R_26103705_mef2/1012	chr3R_26103659_bin/1012	43915	0	46	0.612862487680402	0.642692069975546	TRUE	TRUE	FALSE
chr3R_30735345	Mef2, 10-12h	Bin, 10-12h	Mef2	Bin	chr3R_30735182_mef2/1012	chr3R_30735351_bin/1012	34927	0	169	0.60603646835253	0.704949995761432	FALSE	TRUE	FALSE
chr2L_20489455	Bin, 6-8h	Bin, 10-12h	Bin	Bin	chr2L_20489427_bin/68	chr2L_20489427_bin/1012	0	0	0	0.693986608534337	0.678066819226707	TRUE	TRUE	TRUE
chr2R_13475144	Bin, 6-8h	Bin, 10-12h	Bin	Bin	chr2R_13475140_bin/68	chr2R_13475140_bin/1012	0	0	0	0.797016677540209	0.751227428805713	FALSE	FALSE	TRUE
chr2R_16127173	Bin, 6-8h	Bin, 10-12h	Bin	Bin	chr2R_16127225_bin/68	chr2R_16127200_bin/1012	0	0	25	0.685477771189263	0.739575533377292	FALSE	FALSE	TRUE
chr2R_16127177	Bin, 6-8h	Bin, 10-12h	Bin	Bin	chr2R_16127225_bin/68	chr2R_16127200_bin/1012	0	0	25	0.685477771189263	0.739575533377292	FALSE	FALSE	TRUE
chr2R_16127206	Bin, 6-8h	Bin, 10-12h	Bin	Bin	chr2R_16127225_bin/68	chr2R_16127200_bin/1012	0	0	25	0.685477771189263	0.739575533377292	FALSE	FALSE	TRUE
chr3L_13213448	Bin, 6-8h	Bin, 10-12h	Bin	Bin	chr3L_13213403_bin/68	chr3L_13213408_bin/1012	0	0	5	0.709607997965712	0.777658791784112	TRUE	TRUE	TRUE
chr3L_13213449	Bin, 6-8h	Bin, 10-12h	Bin	Bin	chr3L_13213403_bin/68	chr3L_13213408_bin/1012	0	0	5	0.696896519307152	0.712412873862411	FALSE	FALSE	TRUE
chr3L_16567614	Bin, 6-8h	Bin, 10-12h	Bin	Bin	chr3L_16567584_bin/68	chr3L_16567581_bin/1012	0	0	3	0.248174435991235	0.381099533074746	FALSE	FALSE	TRUE
chr3L_5139634	Bin, 6-8h	Bin, 10-12h	Bin	Bin	chr3L_5139629_bin/68	chr3L_5139620_bin/1012	0	0	9	0.36759127392842	0.388282342115973	TRUE	TRUE	TRUE
chr3L_9968298	Bin, 6-8h	Bin, 10-12h	Bin	Bin	chr3L_9968327_bin/68	chr3L_9968353_bin/1012	0	0	26	0.373826951951952	0.395137361678361	TRUE	FALSE	TRUE
chr3R_23385248	Bin, 6-8h	Bin, 10-12h	Bin	Bin	chr3R_23385260_bin/68	chr3R_23385285_bin/1012	0	0	25	0.683135159576337	0.640215753040106	TRUE	TRUE	TRUE
chr3R_26539340	Bin, 6-8h	Bin, 10-12h	Bin	Bin	chr3R_26539317_bin/68	chr3R_26539316_bin/1012	0	0	1	0.654843731507697	0.618735711718061	TRUE	TRUE	TRUE
chr3R_30735345	Bin, 6-8h	Bin, 10-12h	Bin	Bin	chr3R_30735339_bin/68	chr3R_30735351_bin/1012	0	0	12	0.730535241533852	0.704949995761432	TRUE	TRUE	TRUE
chr3R_4381848	Bin, 6-8h	Bin, 10-12h	Bin	Bin	chr3R_4381841_bin/68	chr3R_4381843_bin/1012	0	0	2	0.786286125437825	0.772563295978985	TRUE	TRUE	TRUE
chr3R_5076270	Bin, 6-8h	Bin, 10-12h	Bin	Bin	chr3R_5076270_bin/68	chr3R_5076236_bin/1012	0	0	34	0.249466782730616	0.300466283050771	TRUE	TRUE	TRUE

## Sheet: README
Supplemental Table S4: Coaffected peaks linked to the same variant associated to motif disruption
List of variants linked to the same peak across two conditions where the variant also impacts the motif of at least one of the two transcription factors. The conditions, peak IDs, variant distance to the closest TF motif and allelic imbalance are reported.
