# Supplementary material for: Integrating genetic variation with deep learning provides context for variants impacting transcription factor binding during embryogenesis
Source: Genome Res. 2025 May;35(5):1138–53. doi: 10.1101/gr.279652.124 (PMC12047541; doi:10.1101/gr.279652.124)
Supplement: Supplement 5 [file Supplemental_Table_S5.xlsx]

## Sheet: Sheet1
Dataset	Experiment_ID	TF	FBgn	Biotyope	Tissue	Time_point	Treatment	Paired_end	Input_subtracted	SRR	Input
ENCSR004RJS.CG9876.adult_whole-fly_site-specific-recombination_insertion_FBgn0034821	ENCSR004RJS	CG9876	FBgn0034821	adult	whole-fly	NA	whole-fly,site-specific-recombination,insertion	FALSE	FALSE	remap2022_ENCSR004RJS.CG9876.adult_whole-fly_site-specific-recombination_insertion_FBgn0034821_ENCFF102DSV,remap2022_ENCSR004RJS.CG9876.adult_whole-fly_site-specific-recombination_insertion_FBgn0034821_ENCFF122EYP
ENCSR004RJS.CG9876.adult_whole-fly_site-specific-recombination_insertion_FBgn0034821	ENCSR004RJS	CG9876	FBgn0034821	adult	whole-fly	NA	whole-fly,site-specific-recombination,insertion	FALSE	FALSE	remap2022_ENCSR004RJS.CG9876.adult_whole-fly_site-specific-recombination_insertion_FBgn0034821_ENCFF102DSV,remap2022_ENCSR004RJS.CG9876.adult_whole-fly_site-specific-recombination_insertion_FBgn0034821_ENCFF122EYP
ENCSR004VNY.cad.adult_whole-fly_insertion_FBgn0000251	ENCSR004VNY	cad	FBgn0000251	adult	whole-fly	NA	whole-fly,insertion	FALSE	FALSE	remap2022_ENCSR004VNY.cad.adult_whole-fly_insertion_FBgn0000251_ENCFF452OXT,remap2022_ENCSR004VNY.cad.adult_whole-fly_insertion_FBgn0000251_ENCFF663QQZ
ENCSR004VNY.cad.adult_whole-fly_insertion_FBgn0000251	ENCSR004VNY	cad	FBgn0000251	adult	whole-fly	NA	whole-fly,insertion	FALSE	FALSE	remap2022_ENCSR004VNY.cad.adult_whole-fly_insertion_FBgn0000251_ENCFF452OXT,remap2022_ENCSR004VNY.cad.adult_whole-fly_insertion_FBgn0000251_ENCFF663QQZ
ENCSR005MLL.Pdp1.adult_whole-fly_site-specific-recombination_insertion_FBgn0016694	ENCSR005MLL	Pdp1	FBgn0016694	adult	whole-fly	NA	whole-fly,site-specific-recombination,insertion	FALSE	FALSE	remap2022_ENCSR005MLL.Pdp1.adult_whole-fly_site-specific-recombination_insertion_FBgn0016694_ENCFF150PED,remap2022_ENCSR005MLL.Pdp1.adult_whole-fly_site-specific-recombination_insertion_FBgn0016694_ENCFF083DMO,remap2022_ENCSR005MLL.Pdp1.adult_whole-fly_site-specific-recombination_insertion_FBgn0016694_ENCFF734XFO
ENCSR005MLL.Pdp1.adult_whole-fly_site-specific-recombination_insertion_FBgn0016694	ENCSR005MLL	Pdp1	FBgn0016694	adult	whole-fly	NA	whole-fly,site-specific-recombination,insertion	FALSE	FALSE	remap2022_ENCSR005MLL.Pdp1.adult_whole-fly_site-specific-recombination_insertion_FBgn0016694_ENCFF150PED,remap2022_ENCSR005MLL.Pdp1.adult_whole-fly_site-specific-recombination_insertion_FBgn0016694_ENCFF083DMO,remap2022_ENCSR005MLL.Pdp1.adult_whole-fly_site-specific-recombination_insertion_FBgn0016694_ENCFF734XFO
ENCSR005MLL.Pdp1.adult_whole-fly_site-specific-recombination_insertion_FBgn0016694	ENCSR005MLL	Pdp1	FBgn0016694	adult	whole-fly	NA	whole-fly,site-specific-recombination,insertion	FALSE	FALSE	remap2022_ENCSR005MLL.Pdp1.adult_whole-fly_site-specific-recombination_insertion_FBgn0016694_ENCFF150PED,remap2022_ENCSR005MLL.Pdp1.adult_whole-fly_site-specific-recombination_insertion_FBgn0016694_ENCFF083DMO,remap2022_ENCSR005MLL.Pdp1.adult_whole-fly_site-specific-recombination_insertion_FBgn0016694_ENCFF734XFO
ENCSR007HUT.cyc.adult_whole-fly_site-specific-recombination_insertion_FBgn0023094	ENCSR007HUT	cyc	FBgn0023094	adult	whole-fly	NA	whole-fly,site-specific-recombination,insertion	FALSE	FALSE	remap2022_ENCSR007HUT.cyc.adult_whole-fly_site-specific-recombination_insertion_FBgn0023094_ENCFF842ZFQ,remap2022_ENCSR007HUT.cyc.adult_whole-fly_site-specific-recombination_insertion_FBgn0023094_ENCFF984BCL,remap2022_ENCSR007HUT.cyc.adult_whole-fly_site-specific-recombination_insertion_FBgn0023094_ENCFF943PCE
ENCSR007HUT.cyc.adult_whole-fly_site-specific-recombination_insertion_FBgn0023094	ENCSR007HUT	cyc	FBgn0023094	adult	whole-fly	NA	whole-fly,site-specific-recombination,insertion	FALSE	FALSE	remap2022_ENCSR007HUT.cyc.adult_whole-fly_site-specific-recombination_insertion_FBgn0023094_ENCFF842ZFQ,remap2022_ENCSR007HUT.cyc.adult_whole-fly_site-specific-recombination_insertion_FBgn0023094_ENCFF984BCL,remap2022_ENCSR007HUT.cyc.adult_whole-fly_site-specific-recombination_insertion_FBgn0023094_ENCFF943PCE
ENCSR007HUT.cyc.adult_whole-fly_site-specific-recombination_insertion_FBgn0023094	ENCSR007HUT	cyc	FBgn0023094	adult	whole-fly	NA	whole-fly,site-specific-recombination,insertion	FALSE	FALSE	remap2022_ENCSR007HUT.cyc.adult_whole-fly_site-specific-recombination_insertion_FBgn0023094_ENCFF842ZFQ,remap2022_ENCSR007HUT.cyc.adult_whole-fly_site-specific-recombination_insertion_FBgn0023094_ENCFF984BCL,remap2022_ENCSR007HUT.cyc.adult_whole-fly_site-specific-recombination_insertion_FBgn0023094_ENCFF943PCE
ENCSR008NYP.sug.adult_whole-fly_site-specific-recombination_insertion_FBgn0033782	ENCSR008NYP	sug	FBgn0033782	adult	whole-fly	NA	whole-fly,site-specific-recombination,insertion	FALSE	FALSE	remap2022_ENCSR008NYP.sug.adult_whole-fly_site-specific-recombination_insertion_FBgn0033782_ENCFF139XDM,remap2022_ENCSR008NYP.sug.adult_whole-fly_site-specific-recombination_insertion_FBgn0033782_ENCFF431YIK
ENCSR008NYP.sug.adult_whole-fly_site-specific-recombination_insertion_FBgn0033782	ENCSR008NYP	sug	FBgn0033782	adult	whole-fly	NA	whole-fly,site-specific-recombination,insertion	FALSE	FALSE	remap2022_ENCSR008NYP.sug.adult_whole-fly_site-specific-recombination_insertion_FBgn0033782_ENCFF139XDM,remap2022_ENCSR008NYP.sug.adult_whole-fly_site-specific-recombination_insertion_FBgn0033782_ENCFF431YIK
ENCSR012MXT.Nf-YC.adult_whole-fly_site-specific-recombination_insertion_FBgn0029905	ENCSR012MXT	Nf-YC	FBgn0029905	adult	whole-fly	NA	whole-fly,site-specific-recombination,insertion	FALSE	FALSE	remap2022_ENCSR012MXT.Nf-YC.adult_whole-fly_site-specific-recombination_insertion_FBgn0029905_ENCFF901PCU,remap2022_ENCSR012MXT.Nf-YC.adult_whole-fly_site-specific-recombination_insertion_FBgn0029905_ENCFF722CVZ,remap2022_ENCSR012MXT.Nf-YC.adult_whole-fly_site-specific-recombination_insertion_FBgn0029905_ENCFF882RRS
ENCSR012MXT.Nf-YC.adult_whole-fly_site-specific-recombination_insertion_FBgn0029905	ENCSR012MXT	Nf-YC	FBgn0029905	adult	whole-fly	NA	whole-fly,site-specific-recombination,insertion	FALSE	FALSE	remap2022_ENCSR012MXT.Nf-YC.adult_whole-fly_site-specific-recombination_insertion_FBgn0029905_ENCFF901PCU,remap2022_ENCSR012MXT.Nf-YC.adult_whole-fly_site-specific-recombination_insertion_FBgn0029905_ENCFF722CVZ,remap2022_ENCSR012MXT.Nf-YC.adult_whole-fly_site-specific-recombination_insertion_FBgn0029905_ENCFF882RRS
ENCSR012MXT.Nf-YC.adult_whole-fly_site-specific-recombination_insertion_FBgn0029905	ENCSR012MXT	Nf-YC	FBgn0029905	adult	whole-fly	NA	whole-fly,site-specific-recombination,insertion	FALSE	FALSE	remap2022_ENCSR012MXT.Nf-YC.adult_whole-fly_site-specific-recombination_insertion_FBgn0029905_ENCFF901PCU,remap2022_ENCSR012MXT.Nf-YC.adult_whole-fly_site-specific-recombination_insertion_FBgn0029905_ENCFF722CVZ,remap2022_ENCSR012MXT.Nf-YC.adult_whole-fly_site-specific-recombination_insertion_FBgn0029905_ENCFF882RRS
ENCSR014ETB.lola.adult_whole-fly_insertion_FBgn0283521	ENCSR014ETB	lola	FBgn0283521	adult	whole-fly	NA	whole-fly,insertion	FALSE	FALSE	remap2022_ENCSR014ETB.lola.adult_whole-fly_insertion_FBgn0283521_ENCFF417PPL,remap2022_ENCSR014ETB.lola.adult_whole-fly_insertion_FBgn0283521_ENCFF947DEU,remap2022_ENCSR014ETB.lola.adult_whole-fly_insertion_FBgn0283521_ENCFF769CCQ
ENCSR014ETB.lola.adult_whole-fly_insertion_FBgn0283521	ENCSR014ETB	lola	FBgn0283521	adult	whole-fly	NA	whole-fly,insertion	FALSE	FALSE	remap2022_ENCSR014ETB.lola.adult_whole-fly_insertion_FBgn0283521_ENCFF417PPL,remap2022_ENCSR014ETB.lola.adult_whole-fly_insertion_FBgn0283521_ENCFF947DEU,remap2022_ENCSR014ETB.lola.adult_whole-fly_insertion_FBgn0283521_ENCFF769CCQ
ENCSR014ETB.lola.adult_whole-fly_insertion_FBgn0283521	ENCSR014ETB	lola	FBgn0283521	adult	whole-fly	NA	whole-fly,insertion	FALSE	FALSE	remap2022_ENCSR014ETB.lola.adult_whole-fly_insertion_FBgn0283521_ENCFF417PPL,remap2022_ENCSR014ETB.lola.adult_whole-fly_insertion_FBgn0283521_ENCFF947DEU,remap2022_ENCSR014ETB.lola.adult_whole-fly_insertion_FBgn0283521_ENCFF769CCQ
ENCSR015ZUX.E-spl-m-beta-HLH.adult_whole-fly_site-specific-recombination_insertion_FBgn0002733	ENCSR015ZUX	E-spl-m-beta-HLH	FBgn0002733	adult	whole-fly	NA	whole-fly,site-specific-recombination,insertion	FALSE	FALSE	remap2022_ENCSR015ZUX.E-spl-m-beta-HLH.adult_whole-fly_site-specific-recombination_insertion_FBgn0002733_ENCFF402LDU,remap2022_ENCSR015ZUX.E-spl-m-beta-HLH.adult_whole-fly_site-specific-recombination_insertion_FBgn0002733_ENCFF279VPR
ENCSR015ZUX.E-spl-m-beta-HLH.adult_whole-fly_site-specific-recombination_insertion_FBgn0002733	ENCSR015ZUX	E-spl-m-beta-HLH	FBgn0002733	adult	whole-fly	NA	whole-fly,site-specific-recombination,insertion	FALSE	FALSE	remap2022_ENCSR015ZUX.E-spl-m-beta-HLH.adult_whole-fly_site-specific-recombination_insertion_FBgn0002733_ENCFF402LDU,remap2022_ENCSR015ZUX.E-spl-m-beta-HLH.adult_whole-fly_site-specific-recombination_insertion_FBgn0002733_ENCFF279VPR
ENCSR017FMO.phol.adult_whole-fly_site-specific-recombination_insertion_FBgn0035997	ENCSR017FMO	phol	FBgn0035997	adult	whole-fly	NA	whole-fly,site-specific-recombination,insertion	FALSE	FALSE	remap2022_ENCSR017FMO.phol.adult_whole-fly_site-specific-recombination_insertion_FBgn0035997_ENCFF403MPK,remap2022_ENCSR017FMO.phol.adult_whole-fly_site-specific-recombination_insertion_FBgn0035997_ENCFF378CSZ,remap2022_ENCSR017FMO.phol.adult_whole-fly_site-specific-recombination_insertion_FBgn0035997_ENCFF335DFM
ENCSR017FMO.phol.adult_whole-fly_site-specific-recombination_insertion_FBgn0035997	ENCSR017FMO	phol	FBgn0035997	adult	whole-fly	NA	whole-fly,site-specific-recombination,insertion	FALSE	FALSE	remap2022_ENCSR017FMO.phol.adult_whole-fly_site-specific-recombination_insertion_FBgn0035997_ENCFF403MPK,remap2022_ENCSR017FMO.phol.adult_whole-fly_site-specific-recombination_insertion_FBgn0035997_ENCFF378CSZ,remap2022_ENCSR017FMO.phol.adult_whole-fly_site-specific-recombination_insertion_FBgn0035997_ENCFF335DFM
ENCSR017FMO.phol.adult_whole-fly_site-specific-recombination_insertion_FBgn0035997	ENCSR017FMO	phol	FBgn0035997	adult	whole-fly	NA	whole-fly,site-specific-recombination,insertion	FALSE	FALSE	remap2022_ENCSR017FMO.phol.adult_whole-fly_site-specific-recombination_insertion_FBgn0035997_ENCFF403MPK,remap2022_ENCSR017FMO.phol.adult_whole-fly_site-specific-recombination_insertion_FBgn0035997_ENCFF378CSZ,remap2022_ENCSR017FMO.phol.adult_whole-fly_site-specific-recombination_insertion_FBgn0035997_ENCFF335DFM
ENCSR018VBD.CG34367.adult_whole-fly_site-specific-recombination_insertion_FBgn0085396	ENCSR018VBD	CG34367	FBgn0085396	adult	whole-fly	NA	whole-fly,site-specific-recombination,insertion	FALSE	FALSE	remap2022_ENCSR018VBD.CG34367.adult_whole-fly_site-specific-recombination_insertion_FBgn0085396_ENCFF336POT,remap2022_ENCSR018VBD.CG34367.adult_whole-fly_site-specific-recombination_insertion_FBgn0085396_ENCFF187AKI
ENCSR018VBD.CG34367.adult_whole-fly_site-specific-recombination_insertion_FBgn0085396	ENCSR018VBD	CG34367	FBgn0085396	adult	whole-fly	NA	whole-fly,site-specific-recombination,insertion	FALSE	FALSE	remap2022_ENCSR018VBD.CG34367.adult_whole-fly_site-specific-recombination_insertion_FBgn0085396_ENCFF336POT,remap2022_ENCSR018VBD.CG34367.adult_whole-fly_site-specific-recombination_insertion_FBgn0085396_ENCFF187AKI
ENCSR020BAG.Dfd.adult_whole-fly_site-specific-recombination_insertion_FBgn0000439	ENCSR020BAG	Dfd	FBgn0000439	adult	whole-fly	NA	whole-fly,site-specific-recombination,insertion	FALSE	FALSE	remap2022_ENCSR020BAG.Dfd.adult_whole-fly_site-specific-recombination_insertion_FBgn0000439_ENCFF983FXW,remap2022_ENCSR020BAG.Dfd.adult_whole-fly_site-specific-recombination_insertion_FBgn0000439_ENCFF128TEX
ENCSR020BAG.Dfd.adult_whole-fly_site-specific-recombination_insertion_FBgn0000439	ENCSR020BAG	Dfd	FBgn0000439	adult	whole-fly	NA	whole-fly,site-specific-recombination,insertion	FALSE	FALSE	remap2022_ENCSR020BAG.Dfd.adult_whole-fly_site-specific-recombination_insertion_FBgn0000439_ENCFF983FXW,remap2022_ENCSR020BAG.Dfd.adult_whole-fly_site-specific-recombination_insertion_FBgn0000439_ENCFF128TEX
ENCSR021FJA.NK7-1.adult_whole-fly_site-specific-recombination_insertion_FBgn0024321	ENCSR021FJA	NK7-1	FBgn0024321	adult	whole-fly	NA	whole-fly,site-specific-recombination,insertion	FALSE	FALSE	remap2022_ENCSR021FJA.NK7-1.adult_whole-fly_site-specific-recombination_insertion_FBgn0024321_ENCFF879QNV,remap2022_ENCSR021FJA.NK7-1.adult_whole-fly_site-specific-recombination_insertion_FBgn0024321_ENCFF267VST,remap2022_ENCSR021FJA.NK7-1.adult_whole-fly_site-specific-recombination_insertion_FBgn0024321_ENCFF919MZS
ENCSR021FJA.NK7-1.adult_whole-fly_site-specific-recombination_insertion_FBgn0024321	ENCSR021FJA	NK7-1	FBgn0024321	adult	whole-fly	NA	whole-fly,site-specific-recombination,insertion	FALSE	FALSE	remap2022_ENCSR021FJA.NK7-1.adult_whole-fly_site-specific-recombination_insertion_FBgn0024321_ENCFF879QNV,remap2022_ENCSR021FJA.NK7-1.adult_whole-fly_site-specific-recombination_insertion_FBgn0024321_ENCFF267VST,remap2022_ENCSR021FJA.NK7-1.adult_whole-fly_site-specific-recombination_insertion_FBgn0024321_ENCFF919MZS
ENCSR021FJA.NK7-1.adult_whole-fly_site-specific-recombination_insertion_FBgn0024321	ENCSR021FJA	NK7-1	FBgn0024321	adult	whole-fly	NA	whole-fly,site-specific-recombination,insertion	FALSE	FALSE	remap2022_ENCSR021FJA.NK7-1.adult_whole-fly_site-specific-recombination_insertion_FBgn0024321_ENCFF879QNV,remap2022_ENCSR021FJA.NK7-1.adult_whole-fly_site-specific-recombination_insertion_FBgn0024321_ENCFF267VST,remap2022_ENCSR021FJA.NK7-1.adult_whole-fly_site-specific-recombination_insertion_FBgn0024321_ENCFF919MZS
ENCSR021VXG.CG10209.adult_whole-fly_site-specific-recombination_insertion_FBgn0033971	ENCSR021VXG	CG10209	FBgn0033971	adult	whole-fly	NA	whole-fly,site-specific-recombination,insertion	FALSE	FALSE	remap2022_ENCSR021VXG.CG10209.adult_whole-fly_site-specific-recombination_insertion_FBgn0033971_ENCFF534UDN,remap2022_ENCSR021VXG.CG10209.adult_whole-fly_site-specific-recombination_insertion_FBgn0033971_ENCFF349PFX,remap2022_ENCSR021VXG.CG10209.adult_whole-fly_site-specific-recombination_insertion_FBgn0033971_ENCFF073SKE
ENCSR021VXG.CG10209.adult_whole-fly_site-specific-recombination_insertion_FBgn0033971	ENCSR021VXG	CG10209	FBgn0033971	adult	whole-fly	NA	whole-fly,site-specific-recombination,insertion	FALSE	FALSE	remap2022_ENCSR021VXG.CG10209.adult_whole-fly_site-specific-recombination_insertion_FBgn0033971_ENCFF534UDN,remap2022_ENCSR021VXG.CG10209.adult_whole-fly_site-specific-recombination_insertion_FBgn0033971_ENCFF349PFX,remap2022_ENCSR021VXG.CG10209.adult_whole-fly_site-specific-recombination_insertion_FBgn0033971_ENCFF073SKE
ENCSR021VXG.CG10209.adult_whole-fly_site-specific-recombination_insertion_FBgn0033971	ENCSR021VXG	CG10209	FBgn0033971	adult	whole-fly	NA	whole-fly,site-specific-recombination,insertion	FALSE	FALSE	remap2022_ENCSR021VXG.CG10209.adult_whole-fly_site-specific-recombination_insertion_FBgn0033971_ENCFF534UDN,remap2022_ENCSR021VXG.CG10209.adult_whole-fly_site-specific-recombination_insertion_FBgn0033971_ENCFF349PFX,remap2022_ENCSR021VXG.CG10209.adult_whole-fly_site-specific-recombination_insertion_FBgn0033971_ENCFF073SKE
ENCSR025MAQ.ATbp.adult_whole-fly_site-specific-recombination_insertion_FBgn0039946	ENCSR025MAQ	ATbp	FBgn0039946	adult	whole-fly	NA	whole-fly,site-specific-recombination,insertion	FALSE	FALSE	remap2022_ENCSR025MAQ.ATbp.adult_whole-fly_site-specific-recombination_insertion_FBgn0039946_ENCFF287YCH,remap2022_ENCSR025MAQ.ATbp.adult_whole-fly_site-specific-recombination_insertion_FBgn0039946_ENCFF761TOM
ENCSR025MAQ.ATbp.adult_whole-fly_site-specific-recombination_insertion_FBgn0039946	ENCSR025MAQ	ATbp	FBgn0039946	adult	whole-fly	NA	whole-fly,site-specific-recombination,insertion	FALSE	FALSE	remap2022_ENCSR025MAQ.ATbp.adult_whole-fly_site-specific-recombination_insertion_FBgn0039946_ENCFF287YCH,remap2022_ENCSR025MAQ.ATbp.adult_whole-fly_site-specific-recombination_insertion_FBgn0039946_ENCFF761TOM
ENCSR027AMS.CG12659.adult_whole-fly_site-specific-recombination_insertion_FBgn0040929	ENCSR027AMS	CG12659	FBgn0040929	adult	whole-fly	NA	whole-fly,site-specific-recombination,insertion	FALSE	FALSE	remap2022_ENCSR027AMS.CG12659.adult_whole-fly_site-specific-recombination_insertion_FBgn0040929_ENCFF736ISE,remap2022_ENCSR027AMS.CG12659.adult_whole-fly_site-specific-recombination_insertion_FBgn0040929_ENCFF631OLF,remap2022_ENCSR027AMS.CG12659.adult_whole-fly_site-specific-recombination_insertion_FBgn0040929_ENCFF706SSG
ENCSR027AMS.CG12659.adult_whole-fly_site-specific-recombination_insertion_FBgn0040929	ENCSR027AMS	CG12659	FBgn0040929	adult	whole-fly	NA	whole-fly,site-specific-recombination,insertion	FALSE	FALSE	remap2022_ENCSR027AMS.CG12659.adult_whole-fly_site-specific-recombination_insertion_FBgn0040929_ENCFF736ISE,remap2022_ENCSR027AMS.CG12659.adult_whole-fly_site-specific-recombination_insertion_FBgn0040929_ENCFF631OLF,remap2022_ENCSR027AMS.CG12659.adult_whole-fly_site-specific-recombination_insertion_FBgn0040929_ENCFF706SSG
ENCSR027AMS.CG12659.adult_whole-fly_site-specific-recombination_insertion_FBgn0040929	ENCSR027AMS	CG12659	FBgn0040929	adult	whole-fly	NA	whole-fly,site-specific-recombination,insertion	FALSE	FALSE	remap2022_ENCSR027AMS.CG12659.adult_whole-fly_site-specific-recombination_insertion_FBgn0040929_ENCFF736ISE,remap2022_ENCSR027AMS.CG12659.adult_whole-fly_site-specific-recombination_insertion_FBgn0040929_ENCFF631OLF,remap2022_ENCSR027AMS.CG12659.adult_whole-fly_site-specific-recombination_insertion_FBgn0040929_ENCFF706SSG
ENCSR028DHQ.CG12299.adult_whole-fly_site-specific-recombination_insertion_FBgn0032295	ENCSR028DHQ	CG12299	FBgn0032295	adult	whole-fly	NA	whole-fly,site-specific-recombination,insertion	FALSE	FALSE	remap2022_ENCSR028DHQ.CG12299.adult_whole-fly_site-specific-recombination_insertion_FBgn0032295_ENCFF420PKV,remap2022_ENCSR028DHQ.CG12299.adult_whole-fly_site-specific-recombination_insertion_FBgn0032295_ENCFF508ZUQ
ENCSR028DHQ.CG12299.adult_whole-fly_site-specific-recombination_insertion_FBgn0032295	ENCSR028DHQ	CG12299	FBgn0032295	adult	whole-fly	NA	whole-fly,site-specific-recombination,insertion	FALSE	FALSE	remap2022_ENCSR028DHQ.CG12299.adult_whole-fly_site-specific-recombination_insertion_FBgn0032295_ENCFF420PKV,remap2022_ENCSR028DHQ.CG12299.adult_whole-fly_site-specific-recombination_insertion_FBgn0032295_ENCFF508ZUQ
ENCSR032CDC.chif.adult_whole-fly_site-specific-recombination_insertion_FBgn0000307	ENCSR032CDC	chif	FBgn0000307	adult	whole-fly	NA	whole-fly,site-specific-recombination,insertion	FALSE	FALSE	remap2022_ENCSR032CDC.chif.adult_whole-fly_site-specific-recombination_insertion_FBgn0000307_ENCFF011ITC,remap2022_ENCSR032CDC.chif.adult_whole-fly_site-specific-recombination_insertion_FBgn0000307_ENCFF570BTI,remap2022_ENCSR032CDC.chif.adult_whole-fly_site-specific-recombination_insertion_FBgn0000307_ENCFF357VYU
ENCSR032CDC.chif.adult_whole-fly_site-specific-recombination_insertion_FBgn0000307	ENCSR032CDC	chif	FBgn0000307	adult	whole-fly	NA	whole-fly,site-specific-recombination,insertion	FALSE	FALSE	remap2022_ENCSR032CDC.chif.adult_whole-fly_site-specific-recombination_insertion_FBgn0000307_ENCFF011ITC,remap2022_ENCSR032CDC.chif.adult_whole-fly_site-specific-recombination_insertion_FBgn0000307_ENCFF570BTI,remap2022_ENCSR032CDC.chif.adult_whole-fly_site-specific-recombination_insertion_FBgn0000307_ENCFF357VYU
ENCSR032CDC.chif.adult_whole-fly_site-specific-recombination_insertion_FBgn0000307	ENCSR032CDC	chif	FBgn0000307	adult	whole-fly	NA	whole-fly,site-specific-recombination,insertion	FALSE	FALSE	remap2022_ENCSR032CDC.chif.adult_whole-fly_site-specific-recombination_insertion_FBgn0000307_ENCFF011ITC,remap2022_ENCSR032CDC.chif.adult_whole-fly_site-specific-recombination_insertion_FBgn0000307_ENCFF570BTI,remap2022_ENCSR032CDC.chif.adult_whole-fly_site-specific-recombination_insertion_FBgn0000307_ENCFF357VYU
ENCSR032DLA.Usf.adult_whole-fly_site-specific-recombination_insertion_FBgn0029711	ENCSR032DLA	Usf	FBgn0029711	adult	whole-fly	NA	whole-fly,site-specific-recombination,insertion	FALSE	FALSE	remap2022_ENCSR032DLA.Usf.adult_whole-fly_site-specific-recombination_insertion_FBgn0029711_ENCFF106IOI,remap2022_ENCSR032DLA.Usf.adult_whole-fly_site-specific-recombination_insertion_FBgn0029711_ENCFF652WRY
ENCSR032DLA.Usf.adult_whole-fly_site-specific-recombination_insertion_FBgn0029711	ENCSR032DLA	Usf	FBgn0029711	adult	whole-fly	NA	whole-fly,site-specific-recombination,insertion	FALSE	FALSE	remap2022_ENCSR032DLA.Usf.adult_whole-fly_site-specific-recombination_insertion_FBgn0029711_ENCFF106IOI,remap2022_ENCSR032DLA.Usf.adult_whole-fly_site-specific-recombination_insertion_FBgn0029711_ENCFF652WRY
ENCSR032HMJ.E-z.adult_whole-fly_site-specific-recombination_insertion_FBgn0000629	ENCSR032HMJ	E-z	FBgn0000629	adult	whole-fly	NA	whole-fly,site-specific-recombination,insertion	FALSE	FALSE	remap2022_ENCSR032HMJ.E-z.adult_whole-fly_site-specific-recombination_insertion_FBgn0000629_ENCFF588SBM,remap2022_ENCSR032HMJ.E-z.adult_whole-fly_site-specific-recombination_insertion_FBgn0000629_ENCFF927ZKX,remap2022_ENCSR032HMJ.E-z.adult_whole-fly_site-specific-recombination_insertion_FBgn0000629_ENCFF603OAJ
ENCSR032HMJ.E-z.adult_whole-fly_site-specific-recombination_insertion_FBgn0000629	ENCSR032HMJ	E-z	FBgn0000629	adult	whole-fly	NA	whole-fly,site-specific-recombination,insertion	FALSE	FALSE	remap2022_ENCSR032HMJ.E-z.adult_whole-fly_site-specific-recombination_insertion_FBgn0000629_ENCFF588SBM,remap2022_ENCSR032HMJ.E-z.adult_whole-fly_site-specific-recombination_insertion_FBgn0000629_ENCFF927ZKX,remap2022_ENCSR032HMJ.E-z.adult_whole-fly_site-specific-recombination_insertion_FBgn0000629_ENCFF603OAJ
ENCSR032HMJ.E-z.adult_whole-fly_site-specific-recombination_insertion_FBgn0000629	ENCSR032HMJ	E-z	FBgn0000629	adult	whole-fly	NA	whole-fly,site-specific-recombination,insertion	FALSE	FALSE	remap2022_ENCSR032HMJ.E-z.adult_whole-fly_site-specific-recombination_insertion_FBgn0000629_ENCFF588SBM,remap2022_ENCSR032HMJ.E-z.adult_whole-fly_site-specific-recombination_insertion_FBgn0000629_ENCFF927ZKX,remap2022_ENCSR032HMJ.E-z.adult_whole-fly_site-specific-recombination_insertion_FBgn0000629_ENCFF603OAJ
ENCSR033IIP.pan.adult_whole-fly_FBgn0085432	ENCSR033IIP	pan	FBgn0085432	adult	whole-fly	NA	whole-fly	FALSE	FALSE	remap2022_ENCSR033IIP.pan.adult_whole-fly_FBgn0085432_ENCFF882HVE,remap2022_ENCSR033IIP.pan.adult_whole-fly_FBgn0085432_ENCFF218EIV
ENCSR033IIP.pan.adult_whole-fly_FBgn0085432	ENCSR033IIP	pan	FBgn0085432	adult	whole-fly	NA	whole-fly	FALSE	FALSE	remap2022_ENCSR033IIP.pan.adult_whole-fly_FBgn0085432_ENCFF882HVE,remap2022_ENCSR033IIP.pan.adult_whole-fly_FBgn0085432_ENCFF218EIV
ENCSR033ZHC.CG7101.adult_whole-fly_site-specific-recombination_insertion_FBgn0030963	ENCSR033ZHC	CG7101	FBgn0030963	adult	whole-fly	NA	whole-fly,site-specific-recombination,insertion	FALSE	FALSE	remap2022_ENCSR033ZHC.CG7101.adult_whole-fly_site-specific-recombination_insertion_FBgn0030963_ENCFF565NPF,remap2022_ENCSR033ZHC.CG7101.adult_whole-fly_site-specific-recombination_insertion_FBgn0030963_ENCFF891AWW
ENCSR033ZHC.CG7101.adult_whole-fly_site-specific-recombination_insertion_FBgn0030963	ENCSR033ZHC	CG7101	FBgn0030963	adult	whole-fly	NA	whole-fly,site-specific-recombination,insertion	FALSE	FALSE	remap2022_ENCSR033ZHC.CG7101.adult_whole-fly_site-specific-recombination_insertion_FBgn0030963_ENCFF565NPF,remap2022_ENCSR033ZHC.CG7101.adult_whole-fly_site-specific-recombination_insertion_FBgn0030963_ENCFF891AWW
ENCSR035GCI.nau.adult_whole-fly_site-specific-recombination_insertion_FBgn0002922	ENCSR035GCI	nau	FBgn0002922	adult	whole-fly	NA	whole-fly,site-specific-recombination,insertion	FALSE	FALSE	remap2022_ENCSR035GCI.nau.adult_whole-fly_site-specific-recombination_insertion_FBgn0002922_ENCFF957MKV,remap2022_ENCSR035GCI.nau.adult_whole-fly_site-specific-recombination_insertion_FBgn0002922_ENCFF772UAH,remap2022_ENCSR035GCI.nau.adult_whole-fly_site-specific-recombination_insertion_FBgn0002922_ENCFF610VJS
ENCSR035GCI.nau.adult_whole-fly_site-specific-recombination_insertion_FBgn0002922	ENCSR035GCI	nau	FBgn0002922	adult	whole-fly	NA	whole-fly,site-specific-recombination,insertion	FALSE	FALSE	remap2022_ENCSR035GCI.nau.adult_whole-fly_site-specific-recombination_insertion_FBgn0002922_ENCFF957MKV,remap2022_ENCSR035GCI.nau.adult_whole-fly_site-specific-recombination_insertion_FBgn0002922_ENCFF772UAH,remap2022_ENCSR035GCI.nau.adult_whole-fly_site-specific-recombination_insertion_FBgn0002922_ENCFF610VJS
ENCSR035GCI.nau.adult_whole-fly_site-specific-recombination_insertion_FBgn0002922	ENCSR035GCI	nau	FBgn0002922	adult	whole-fly	NA	whole-fly,site-specific-recombination,insertion	FALSE	FALSE	remap2022_ENCSR035GCI.nau.adult_whole-fly_site-specific-recombination_insertion_FBgn0002922_ENCFF957MKV,remap2022_ENCSR035GCI.nau.adult_whole-fly_site-specific-recombination_insertion_FBgn0002922_ENCFF772UAH,remap2022_ENCSR035GCI.nau.adult_whole-fly_site-specific-recombination_insertion_FBgn0002922_ENCFF610VJS
ENCSR038HZR.CoRest.adult_whole-fly_site-specific-recombination_insertion_FBgn0261573	ENCSR038HZR	CoRest	FBgn0261573	adult	whole-fly	NA	whole-fly,site-specific-recombination,insertion	FALSE	FALSE	remap2022_ENCSR038HZR.CoRest.adult_whole-fly_site-specific-recombination_insertion_FBgn0261573_ENCFF118URL,remap2022_ENCSR038HZR.CoRest.adult_whole-fly_site-specific-recombination_insertion_FBgn0261573_ENCFF688SGR,remap2022_ENCSR038HZR.CoRest.adult_whole-fly_site-specific-recombination_insertion_FBgn0261573_ENCFF263QWT
ENCSR038HZR.CoRest.adult_whole-fly_site-specific-recombination_insertion_FBgn0261573	ENCSR038HZR	CoRest	FBgn0261573	adult	whole-fly	NA	whole-fly,site-specific-recombination,insertion	FALSE	FALSE	remap2022_ENCSR038HZR.CoRest.adult_whole-fly_site-specific-recombination_insertion_FBgn0261573_ENCFF118URL,remap2022_ENCSR038HZR.CoRest.adult_whole-fly_site-specific-recombination_insertion_FBgn0261573_ENCFF688SGR,remap2022_ENCSR038HZR.CoRest.adult_whole-fly_site-specific-recombination_insertion_FBgn0261573_ENCFF263QWT
ENCSR038HZR.CoRest.adult_whole-fly_site-specific-recombination_insertion_FBgn0261573	ENCSR038HZR	CoRest	FBgn0261573	adult	whole-fly	NA	whole-fly,site-specific-recombination,insertion	FALSE	FALSE	remap2022_ENCSR038HZR.CoRest.adult_whole-fly_site-specific-recombination_insertion_FBgn0261573_ENCFF118URL,remap2022_ENCSR038HZR.CoRest.adult_whole-fly_site-specific-recombination_insertion_FBgn0261573_ENCFF688SGR,remap2022_ENCSR038HZR.CoRest.adult_whole-fly_site-specific-recombination_insertion_FBgn0261573_ENCFF263QWT
ENCSR042FCJ.CG7556.adult_whole-fly_site-specific-recombination_insertion_FBgn0030990	ENCSR042FCJ	CG7556	FBgn0030990	adult	whole-fly	NA	whole-fly,site-specific-recombination,insertion	FALSE	FALSE	remap2022_ENCSR042FCJ.CG7556.adult_whole-fly_site-specific-recombination_insertion_FBgn0030990_ENCFF216GAV,remap2022_ENCSR042FCJ.CG7556.adult_whole-fly_site-specific-recombination_insertion_FBgn0030990_ENCFF885ISS
ENCSR042FCJ.CG7556.adult_whole-fly_site-specific-recombination_insertion_FBgn0030990	ENCSR042FCJ	CG7556	FBgn0030990	adult	whole-fly	NA	whole-fly,site-specific-recombination,insertion	FALSE	FALSE	remap2022_ENCSR042FCJ.CG7556.adult_whole-fly_site-specific-recombination_insertion_FBgn0030990_ENCFF216GAV,remap2022_ENCSR042FCJ.CG7556.adult_whole-fly_site-specific-recombination_insertion_FBgn0030990_ENCFF885ISS
ENCSR042XCV.salr.adult_whole-fly_site-specific-recombination_insertion_FBgn0000287	ENCSR042XCV	salr	FBgn0000287	adult	whole-fly	NA	whole-fly,site-specific-recombination,insertion	FALSE	FALSE	remap2022_ENCSR042XCV.salr.adult_whole-fly_site-specific-recombination_insertion_FBgn0000287_ENCFF039UBC,remap2022_ENCSR042XCV.salr.adult_whole-fly_site-specific-recombination_insertion_FBgn0000287_ENCFF659JNP,remap2022_ENCSR042XCV.salr.adult_whole-fly_site-specific-recombination_insertion_FBgn0000287_ENCFF548ZZG
ENCSR042XCV.salr.adult_whole-fly_site-specific-recombination_insertion_FBgn0000287	ENCSR042XCV	salr	FBgn0000287	adult	whole-fly	NA	whole-fly,site-specific-recombination,insertion	FALSE	FALSE	remap2022_ENCSR042XCV.salr.adult_whole-fly_site-specific-recombination_insertion_FBgn0000287_ENCFF039UBC,remap2022_ENCSR042XCV.salr.adult_whole-fly_site-specific-recombination_insertion_FBgn0000287_ENCFF659JNP,remap2022_ENCSR042XCV.salr.adult_whole-fly_site-specific-recombination_insertion_FBgn0000287_ENCFF548ZZG
ENCSR042XCV.salr.adult_whole-fly_site-specific-recombination_insertion_FBgn0000287	ENCSR042XCV	salr	FBgn0000287	adult	whole-fly	NA	whole-fly,site-specific-recombination,insertion	FALSE	FALSE	remap2022_ENCSR042XCV.salr.adult_whole-fly_site-specific-recombination_insertion_FBgn0000287_ENCFF039UBC,remap2022_ENCSR042XCV.salr.adult_whole-fly_site-specific-recombination_insertion_FBgn0000287_ENCFF659JNP,remap2022_ENCSR042XCV.salr.adult_whole-fly_site-specific-recombination_insertion_FBgn0000287_ENCFF548ZZG
ENCSR044IDQ.CG12236.adult_whole-fly_site-specific-recombination_insertion_FBgn0029822	ENCSR044IDQ	CG12236	FBgn0029822	adult	whole-fly	NA	whole-fly,site-specific-recombination,insertion	FALSE	FALSE	remap2022_ENCSR044IDQ.CG12236.adult_whole-fly_site-specific-recombination_insertion_FBgn0029822_ENCFF534BBK,remap2022_ENCSR044IDQ.CG12236.adult_whole-fly_site-specific-recombination_insertion_FBgn0029822_ENCFF756WLV
ENCSR044IDQ.CG12236.adult_whole-fly_site-specific-recombination_insertion_FBgn0029822	ENCSR044IDQ	CG12236	FBgn0029822	adult	whole-fly	NA	whole-fly,site-specific-recombination,insertion	FALSE	FALSE	remap2022_ENCSR044IDQ.CG12236.adult_whole-fly_site-specific-recombination_insertion_FBgn0029822_ENCFF534BBK,remap2022_ENCSR044IDQ.CG12236.adult_whole-fly_site-specific-recombination_insertion_FBgn0029822_ENCFF756WLV
ENCSR054BLW.az2.adult_whole-fly_site-specific-recombination_insertion_FBgn0025185	ENCSR054BLW	az2	FBgn0025185	adult	whole-fly	NA	whole-fly,site-specific-recombination,insertion	FALSE	FALSE	remap2022_ENCSR054BLW.az2.adult_whole-fly_site-specific-recombination_insertion_FBgn0025185_ENCFF144JUF,remap2022_ENCSR054BLW.az2.adult_whole-fly_site-specific-recombination_insertion_FBgn0025185_ENCFF006IBH,remap2022_ENCSR054BLW.az2.adult_whole-fly_site-specific-recombination_insertion_FBgn0025185_ENCFF732ZXK
ENCSR054BLW.az2.adult_whole-fly_site-specific-recombination_insertion_FBgn0025185	ENCSR054BLW	az2	FBgn0025185	adult	whole-fly	NA	whole-fly,site-specific-recombination,insertion	FALSE	FALSE	remap2022_ENCSR054BLW.az2.adult_whole-fly_site-specific-recombination_insertion_FBgn0025185_ENCFF144JUF,remap2022_ENCSR054BLW.az2.adult_whole-fly_site-specific-recombination_insertion_FBgn0025185_ENCFF006IBH,remap2022_ENCSR054BLW.az2.adult_whole-fly_site-specific-recombination_insertion_FBgn0025185_ENCFF732ZXK
ENCSR054BLW.az2.adult_whole-fly_site-specific-recombination_insertion_FBgn0025185	ENCSR054BLW	az2	FBgn0025185	adult	whole-fly	NA	whole-fly,site-specific-recombination,insertion	FALSE	FALSE	remap2022_ENCSR054BLW.az2.adult_whole-fly_site-specific-recombination_insertion_FBgn0025185_ENCFF144JUF,remap2022_ENCSR054BLW.az2.adult_whole-fly_site-specific-recombination_insertion_FBgn0025185_ENCFF006IBH,remap2022_ENCSR054BLW.az2.adult_whole-fly_site-specific-recombination_insertion_FBgn0025185_ENCFF732ZXK
ENCSR055BAQ.Coop.adult_whole-fly_site-specific-recombination_insertion_FBgn0263240	ENCSR055BAQ	Coop	FBgn0263240	adult	whole-fly	NA	whole-fly,site-specific-recombination,insertion	FALSE	FALSE	remap2022_ENCSR055BAQ.Coop.adult_whole-fly_site-specific-recombination_insertion_FBgn0263240_ENCFF361ODU,remap2022_ENCSR055BAQ.Coop.adult_whole-fly_site-specific-recombination_insertion_FBgn0263240_ENCFF112XQE,remap2022_ENCSR055BAQ.Coop.adult_whole-fly_site-specific-recombination_insertion_FBgn0263240_ENCFF659WTO
ENCSR055BAQ.Coop.adult_whole-fly_site-specific-recombination_insertion_FBgn0263240	ENCSR055BAQ	Coop	FBgn0263240	adult	whole-fly	NA	whole-fly,site-specific-recombination,insertion	FALSE	FALSE	remap2022_ENCSR055BAQ.Coop.adult_whole-fly_site-specific-recombination_insertion_FBgn0263240_ENCFF361ODU,remap2022_ENCSR055BAQ.Coop.adult_whole-fly_site-specific-recombination_insertion_FBgn0263240_ENCFF112XQE,remap2022_ENCSR055BAQ.Coop.adult_whole-fly_site-specific-recombination_insertion_FBgn0263240_ENCFF659WTO
ENCSR055BAQ.Coop.adult_whole-fly_site-specific-recombination_insertion_FBgn0263240	ENCSR055BAQ	Coop	FBgn0263240	adult	whole-fly	NA	whole-fly,site-specific-recombination,insertion	FALSE	FALSE	remap2022_ENCSR055BAQ.Coop.adult_whole-fly_site-specific-recombination_insertion_FBgn0263240_ENCFF361ODU,remap2022_ENCSR055BAQ.Coop.adult_whole-fly_site-specific-recombination_insertion_FBgn0263240_ENCFF112XQE,remap2022_ENCSR055BAQ.Coop.adult_whole-fly_site-specific-recombination_insertion_FBgn0263240_ENCFF659WTO
ENCSR058DSI.pan.adult_whole-fly_site-specific-recombination_insertion_FBgn0085432	ENCSR058DSI	pan	FBgn0085432	adult	whole-fly	NA	whole-fly,site-specific-recombination,insertion	FALSE	FALSE	remap2022_ENCSR058DSI.pan.adult_whole-fly_site-specific-recombination_insertion_FBgn0085432_ENCFF068IFW,remap2022_ENCSR058DSI.pan.adult_whole-fly_site-specific-recombination_insertion_FBgn0085432_ENCFF957PCC
ENCSR058DSI.pan.adult_whole-fly_site-specific-recombination_insertion_FBgn0085432	ENCSR058DSI	pan	FBgn0085432	adult	whole-fly	NA	whole-fly,site-specific-recombination,insertion	FALSE	FALSE	remap2022_ENCSR058DSI.pan.adult_whole-fly_site-specific-recombination_insertion_FBgn0085432_ENCFF068IFW,remap2022_ENCSR058DSI.pan.adult_whole-fly_site-specific-recombination_insertion_FBgn0085432_ENCFF957PCC
ENCSR059LML.CG32006.adult_whole-fly_site-specific-recombination_insertion_FBgn0052006	ENCSR059LML	CG32006	FBgn0052006	adult	whole-fly	NA	whole-fly,site-specific-recombination,insertion	FALSE	FALSE	remap2022_ENCSR059LML.CG32006.adult_whole-fly_site-specific-recombination_insertion_FBgn0052006_ENCFF040BHL,remap2022_ENCSR059LML.CG32006.adult_whole-fly_site-specific-recombination_insertion_FBgn0052006_ENCFF464AHM,remap2022_ENCSR059LML.CG32006.adult_whole-fly_site-specific-recombination_insertion_FBgn0052006_ENCFF911TZP
ENCSR059LML.CG32006.adult_whole-fly_site-specific-recombination_insertion_FBgn0052006	ENCSR059LML	CG32006	FBgn0052006	adult	whole-fly	NA	whole-fly,site-specific-recombination,insertion	FALSE	FALSE	remap2022_ENCSR059LML.CG32006.adult_whole-fly_site-specific-recombination_insertion_FBgn0052006_ENCFF040BHL,remap2022_ENCSR059LML.CG32006.adult_whole-fly_site-specific-recombination_insertion_FBgn0052006_ENCFF464AHM,remap2022_ENCSR059LML.CG32006.adult_whole-fly_site-specific-recombination_insertion_FBgn0052006_ENCFF911TZP
ENCSR059LML.CG32006.adult_whole-fly_site-specific-recombination_insertion_FBgn0052006	ENCSR059LML	CG32006	FBgn0052006	adult	whole-fly	NA	whole-fly,site-specific-recombination,insertion	FALSE	FALSE	remap2022_ENCSR059LML.CG32006.adult_whole-fly_site-specific-recombination_insertion_FBgn0052006_ENCFF040BHL,remap2022_ENCSR059LML.CG32006.adult_whole-fly_site-specific-recombination_insertion_FBgn0052006_ENCFF464AHM,remap2022_ENCSR059LML.CG32006.adult_whole-fly_site-specific-recombination_insertion_FBgn0052006_ENCFF911TZP
ENCSR059TJM.CG3995.adult_whole-fly_site-specific-recombination_insertion_FBgn0038472	ENCSR059TJM	CG3995	FBgn0038472	adult	whole-fly	NA	whole-fly,site-specific-recombination,insertion	FALSE	FALSE	remap2022_ENCSR059TJM.CG3995.adult_whole-fly_site-specific-recombination_insertion_FBgn0038472_ENCFF988BXX,remap2022_ENCSR059TJM.CG3995.adult_whole-fly_site-specific-recombination_insertion_FBgn0038472_ENCFF541TTO,remap2022_ENCSR059TJM.CG3995.adult_whole-fly_site-specific-recombination_insertion_FBgn0038472_ENCFF304CPF
ENCSR059TJM.CG3995.adult_whole-fly_site-specific-recombination_insertion_FBgn0038472	ENCSR059TJM	CG3995	FBgn0038472	adult	whole-fly	NA	whole-fly,site-specific-recombination,insertion	FALSE	FALSE	remap2022_ENCSR059TJM.CG3995.adult_whole-fly_site-specific-recombination_insertion_FBgn0038472_ENCFF988BXX,remap2022_ENCSR059TJM.CG3995.adult_whole-fly_site-specific-recombination_insertion_FBgn0038472_ENCFF541TTO,remap2022_ENCSR059TJM.CG3995.adult_whole-fly_site-specific-recombination_insertion_FBgn0038472_ENCFF304CPF
ENCSR059TJM.CG3995.adult_whole-fly_site-specific-recombination_insertion_FBgn0038472	ENCSR059TJM	CG3995	FBgn0038472	adult	whole-fly	NA	whole-fly,site-specific-recombination,insertion	FALSE	FALSE	remap2022_ENCSR059TJM.CG3995.adult_whole-fly_site-specific-recombination_insertion_FBgn0038472_ENCFF988BXX,remap2022_ENCSR059TJM.CG3995.adult_whole-fly_site-specific-recombination_insertion_FBgn0038472_ENCFF541TTO,remap2022_ENCSR059TJM.CG3995.adult_whole-fly_site-specific-recombination_insertion_FBgn0038472_ENCFF304CPF
ENCSR059YLP.CG4318.adult_whole-fly_site-specific-recombination_insertion_FBgn0030455	ENCSR059YLP	CG4318	FBgn0030455	adult	whole-fly	NA	whole-fly,site-specific-recombination,insertion	FALSE	FALSE	remap2022_ENCSR059YLP.CG4318.adult_whole-fly_site-specific-recombination_insertion_FBgn0030455_ENCFF403HSU,remap2022_ENCSR059YLP.CG4318.adult_whole-fly_site-specific-recombination_insertion_FBgn0030455_ENCFF593NFG,remap2022_ENCSR059YLP.CG4318.adult_whole-fly_site-specific-recombination_insertion_FBgn0030455_ENCFF593HUL
ENCSR059YLP.CG4318.adult_whole-fly_site-specific-recombination_insertion_FBgn0030455	ENCSR059YLP	CG4318	FBgn0030455	adult	whole-fly	NA	whole-fly,site-specific-recombination,insertion	FALSE	FALSE	remap2022_ENCSR059YLP.CG4318.adult_whole-fly_site-specific-recombination_insertion_FBgn0030455_ENCFF403HSU,remap2022_ENCSR059YLP.CG4318.adult_whole-fly_site-specific-recombination_insertion_FBgn0030455_ENCFF593NFG,remap2022_ENCSR059YLP.CG4318.adult_whole-fly_site-specific-recombination_insertion_FBgn0030455_ENCFF593HUL
ENCSR059YLP.CG4318.adult_whole-fly_site-specific-recombination_insertion_FBgn0030455	ENCSR059YLP	CG4318	FBgn0030455	adult	whole-fly	NA	whole-fly,site-specific-recombination,insertion	FALSE	FALSE	remap2022_ENCSR059YLP.CG4318.adult_whole-fly_site-specific-recombination_insertion_FBgn0030455_ENCFF403HSU,remap2022_ENCSR059YLP.CG4318.adult_whole-fly_site-specific-recombination_insertion_FBgn0030455_ENCFF593NFG,remap2022_ENCSR059YLP.CG4318.adult_whole-fly_site-specific-recombination_insertion_FBgn0030455_ENCFF593HUL
ENCSR060CFV.CG7745.adult_whole-fly_site-specific-recombination_insertion_FBgn0033616	ENCSR060CFV	CG7745	FBgn0033616	adult	whole-fly	NA	whole-fly,site-specific-recombination,insertion	FALSE	FALSE	remap2022_ENCSR060CFV.CG7745.adult_whole-fly_site-specific-recombination_insertion_FBgn0033616_ENCFF448VTX,remap2022_ENCSR060CFV.CG7745.adult_whole-fly_site-specific-recombination_insertion_FBgn0033616_ENCFF740DIL
ENCSR060CFV.CG7745.adult_whole-fly_site-specific-recombination_insertion_FBgn0033616	ENCSR060CFV	CG7745	FBgn0033616	adult	whole-fly	NA	whole-fly,site-specific-recombination,insertion	FALSE	FALSE	remap2022_ENCSR060CFV.CG7745.adult_whole-fly_site-specific-recombination_insertion_FBgn0033616_ENCFF448VTX,remap2022_ENCSR060CFV.CG7745.adult_whole-fly_site-specific-recombination_insertion_FBgn0033616_ENCFF740DIL
ENCSR064GFC.tin.adult_whole-fly_site-specific-recombination_insertion_FBgn0004110	ENCSR064GFC	tin	FBgn0004110	adult	whole-fly	NA	whole-fly,site-specific-recombination,insertion	FALSE	FALSE	remap2022_ENCSR064GFC.tin.adult_whole-fly_site-specific-recombination_insertion_FBgn0004110_ENCFF281IQM,remap2022_ENCSR064GFC.tin.adult_whole-fly_site-specific-recombination_insertion_FBgn0004110_ENCFF113ZWD,remap2022_ENCSR064GFC.tin.adult_whole-fly_site-specific-recombination_insertion_FBgn0004110_ENCFF780JUW,remap2022_ENCSR064GFC.tin.adult_whole-fly_site-specific-recombination_insertion_FBgn000…
ENCSR064GFC.tin.adult_whole-fly_site-specific-recombination_insertion_FBgn0004110	ENCSR064GFC	tin	FBgn0004110	adult	whole-fly	NA	whole-fly,site-specific-recombination,insertion	FALSE	FALSE	remap2022_ENCSR064GFC.tin.adult_whole-fly_site-specific-recombination_insertion_FBgn0004110_ENCFF281IQM,remap2022_ENCSR064GFC.tin.adult_whole-fly_site-specific-recombination_insertion_FBgn0004110_ENCFF113ZWD,remap2022_ENCSR064GFC.tin.adult_whole-fly_site-specific-recombination_insertion_FBgn0004110_ENCFF780JUW,remap2022_ENCSR064GFC.tin.adult_whole-fly_site-specific-recombination_insertion_FBgn000…
ENCSR064GFC.tin.adult_whole-fly_site-specific-recombination_insertion_FBgn0004110	ENCSR064GFC	tin	FBgn0004110	adult	whole-fly	NA	whole-fly,site-specific-recombination,insertion	FALSE	FALSE	remap2022_ENCSR064GFC.tin.adult_whole-fly_site-specific-recombination_insertion_FBgn0004110_ENCFF281IQM,remap2022_ENCSR064GFC.tin.adult_whole-fly_site-specific-recombination_insertion_FBgn0004110_ENCFF113ZWD,remap2022_ENCSR064GFC.tin.adult_whole-fly_site-specific-recombination_insertion_FBgn0004110_ENCFF780JUW,remap2022_ENCSR064GFC.tin.adult_whole-fly_site-specific-recombination_insertion_FBgn000…
ENCSR064GFC.tin.adult_whole-fly_site-specific-recombination_insertion_FBgn0004110	ENCSR064GFC	tin	FBgn0004110	adult	whole-fly	NA	whole-fly,site-specific-recombination,insertion	FALSE	FALSE	remap2022_ENCSR064GFC.tin.adult_whole-fly_site-specific-recombination_insertion_FBgn0004110_ENCFF281IQM,remap2022_ENCSR064GFC.tin.adult_whole-fly_site-specific-recombination_insertion_FBgn0004110_ENCFF113ZWD,remap2022_ENCSR064GFC.tin.adult_whole-fly_site-specific-recombination_insertion_FBgn0004110_ENCFF780JUW,remap2022_ENCSR064GFC.tin.adult_whole-fly_site-specific-recombination_insertion_FBgn000…
ENCSR064GFC.tin.adult_whole-fly_site-specific-recombination_insertion_FBgn0004110	ENCSR064GFC	tin	FBgn0004110	adult	whole-fly	NA	whole-fly,site-specific-recombination,insertion	FALSE	FALSE	remap2022_ENCSR064GFC.tin.adult_whole-fly_site-specific-recombination_insertion_FBgn0004110_ENCFF281IQM,remap2022_ENCSR064GFC.tin.adult_whole-fly_site-specific-recombination_insertion_FBgn0004110_ENCFF113ZWD,remap2022_ENCSR064GFC.tin.adult_whole-fly_site-specific-recombination_insertion_FBgn0004110_ENCFF780JUW,remap2022_ENCSR064GFC.tin.adult_whole-fly_site-specific-recombination_insertion_FBgn000…
ENCSR066ITF.stwl.adult_whole-fly_site-specific-recombination_insertion_FBgn0003459	ENCSR066ITF	stwl	FBgn0003459	adult	whole-fly	NA	whole-fly,site-specific-recombination,insertion	FALSE	FALSE	remap2022_ENCSR066ITF.stwl.adult_whole-fly_site-specific-recombination_insertion_FBgn0003459_ENCFF225VLS,remap2022_ENCSR066ITF.stwl.adult_whole-fly_site-specific-recombination_insertion_FBgn0003459_ENCFF785TWV,remap2022_ENCSR066ITF.stwl.adult_whole-fly_site-specific-recombination_insertion_FBgn0003459_ENCFF958LYD
ENCSR066ITF.stwl.adult_whole-fly_site-specific-recombination_insertion_FBgn0003459	ENCSR066ITF	stwl	FBgn0003459	adult	whole-fly	NA	whole-fly,site-specific-recombination,insertion	FALSE	FALSE	remap2022_ENCSR066ITF.stwl.adult_whole-fly_site-specific-recombination_insertion_FBgn0003459_ENCFF225VLS,remap2022_ENCSR066ITF.stwl.adult_whole-fly_site-specific-recombination_insertion_FBgn0003459_ENCFF785TWV,remap2022_ENCSR066ITF.stwl.adult_whole-fly_site-specific-recombination_insertion_FBgn0003459_ENCFF958LYD
ENCSR066ITF.stwl.adult_whole-fly_site-specific-recombination_insertion_FBgn0003459	ENCSR066ITF	stwl	FBgn0003459	adult	whole-fly	NA	whole-fly,site-specific-recombination,insertion	FALSE	FALSE	remap2022_ENCSR066ITF.stwl.adult_whole-fly_site-specific-recombination_insertion_FBgn0003459_ENCFF225VLS,remap2022_ENCSR066ITF.stwl.adult_whole-fly_site-specific-recombination_insertion_FBgn0003459_ENCFF785TWV,remap2022_ENCSR066ITF.stwl.adult_whole-fly_site-specific-recombination_insertion_FBgn0003459_ENCFF958LYD
ENCSR069AWH.side.adult_whole-fly_site-specific-recombination_insertion_FBgn0016061	ENCSR069AWH	side	FBgn0016061	adult	whole-fly	NA	whole-fly,site-specific-recombination,insertion	FALSE	FALSE	remap2022_ENCSR069AWH.side.adult_whole-fly_site-specific-recombination_insertion_FBgn0016061_ENCFF667YMQ,remap2022_ENCSR069AWH.side.adult_whole-fly_site-specific-recombination_insertion_FBgn0016061_ENCFF712RZY
ENCSR069AWH.side.adult_whole-fly_site-specific-recombination_insertion_FBgn0016061	ENCSR069AWH	side	FBgn0016061	adult	whole-fly	NA	whole-fly,site-specific-recombination,insertion	FALSE	FALSE	remap2022_ENCSR069AWH.side.adult_whole-fly_site-specific-recombination_insertion_FBgn0016061_ENCFF667YMQ,remap2022_ENCSR069AWH.side.adult_whole-fly_site-specific-recombination_insertion_FBgn0016061_ENCFF712RZY
ENCSR073PHL.cic.adult_whole-fly_site-specific-recombination_insertion_FBgn0262582	ENCSR073PHL	cic	FBgn0262582	adult	whole-fly	NA	whole-fly,site-specific-recombination,insertion	FALSE	FALSE	remap2022_ENCSR073PHL.cic.adult_whole-fly_site-specific-recombination_insertion_FBgn0262582_ENCFF163KWQ,remap2022_ENCSR073PHL.cic.adult_whole-fly_site-specific-recombination_insertion_FBgn0262582_ENCFF337IZP
ENCSR073PHL.cic.adult_whole-fly_site-specific-recombination_insertion_FBgn0262582	ENCSR073PHL	cic	FBgn0262582	adult	whole-fly	NA	whole-fly,site-specific-recombination,insertion	FALSE	FALSE	remap2022_ENCSR073PHL.cic.adult_whole-fly_site-specific-recombination_insertion_FBgn0262582_ENCFF163KWQ,remap2022_ENCSR073PHL.cic.adult_whole-fly_site-specific-recombination_insertion_FBgn0262582_ENCFF337IZP
ENCSR074LKQ.pan.adult_whole-fly_FBgn0085432	ENCSR074LKQ	pan	FBgn0085432	adult	whole-fly	NA	whole-fly	FALSE	FALSE	remap2022_ENCSR074LKQ.pan.adult_whole-fly_FBgn0085432_ENCFF437YLI,remap2022_ENCSR074LKQ.pan.adult_whole-fly_FBgn0085432_ENCFF123QCE
ENCSR074LKQ.pan.adult_whole-fly_FBgn0085432	ENCSR074LKQ	pan	FBgn0085432	adult	whole-fly	NA	whole-fly	FALSE	FALSE	remap2022_ENCSR074LKQ.pan.adult_whole-fly_FBgn0085432_ENCFF437YLI,remap2022_ENCSR074LKQ.pan.adult_whole-fly_FBgn0085432_ENCFF123QCE
ENCSR074YRV.lola.adult_whole-fly_insertion_FBgn0283521	ENCSR074YRV	lola	FBgn0283521	adult	whole-fly	NA	whole-fly,insertion	FALSE	FALSE	remap2022_ENCSR074YRV.lola.adult_whole-fly_insertion_FBgn0283521_ENCFF687CDK,remap2022_ENCSR074YRV.lola.adult_whole-fly_insertion_FBgn0283521_ENCFF373IOU
ENCSR074YRV.lola.adult_whole-fly_insertion_FBgn0283521	ENCSR074YRV	lola	FBgn0283521	adult	whole-fly	NA	whole-fly,insertion	FALSE	FALSE	remap2022_ENCSR074YRV.lola.adult_whole-fly_insertion_FBgn0283521_ENCFF687CDK,remap2022_ENCSR074YRV.lola.adult_whole-fly_insertion_FBgn0283521_ENCFF373IOU
ENCSR078TMF.ovo.adult_whole-fly_site-specific-recombination_insertion_FBgn0003028	ENCSR078TMF	ovo	FBgn0003028	adult	whole-fly	NA	whole-fly,site-specific-recombination,insertion	FALSE	FALSE	remap2022_ENCSR078TMF.ovo.adult_whole-fly_site-specific-recombination_insertion_FBgn0003028_ENCFF339FMR,remap2022_ENCSR078TMF.ovo.adult_whole-fly_site-specific-recombination_insertion_FBgn0003028_ENCFF492TMU
ENCSR078TMF.ovo.adult_whole-fly_site-specific-recombination_insertion_FBgn0003028	ENCSR078TMF	ovo	FBgn0003028	adult	whole-fly	NA	whole-fly,site-specific-recombination,insertion	FALSE	FALSE	remap2022_ENCSR078TMF.ovo.adult_whole-fly_site-specific-recombination_insertion_FBgn0003028_ENCFF339FMR,remap2022_ENCSR078TMF.ovo.adult_whole-fly_site-specific-recombination_insertion_FBgn0003028_ENCFF492TMU
ENCSR082FZF.CG2875.adult_whole-fly_site-specific-recombination_insertion_FBgn0029672	ENCSR082FZF	CG2875	FBgn0029672	adult	whole-fly	NA	whole-fly,site-specific-recombination,insertion	FALSE	FALSE	remap2022_ENCSR082FZF.CG2875.adult_whole-fly_site-specific-recombination_insertion_FBgn0029672_ENCFF187SAM,remap2022_ENCSR082FZF.CG2875.adult_whole-fly_site-specific-recombination_insertion_FBgn0029672_ENCFF482RCL
ENCSR082FZF.CG2875.adult_whole-fly_site-specific-recombination_insertion_FBgn0029672	ENCSR082FZF	CG2875	FBgn0029672	adult	whole-fly	NA	whole-fly,site-specific-recombination,insertion	FALSE	FALSE	remap2022_ENCSR082FZF.CG2875.adult_whole-fly_site-specific-recombination_insertion_FBgn0029672_ENCFF187SAM,remap2022_ENCSR082FZF.CG2875.adult_whole-fly_site-specific-recombination_insertion_FBgn0029672_ENCFF482RCL
ENCSR082RBU.Antp.adult_whole-fly_site-specific-recombination_insertion_FBgn0260642	ENCSR082RBU	Antp	FBgn0260642	adult	whole-fly	NA	whole-fly,site-specific-recombination,insertion	FALSE	FALSE	remap2022_ENCSR082RBU.Antp.adult_whole-fly_site-specific-recombination_insertion_FBgn0260642_ENCFF924IVP,remap2022_ENCSR082RBU.Antp.adult_whole-fly_site-specific-recombination_insertion_FBgn0260642_ENCFF194GDT,remap2022_ENCSR082RBU.Antp.adult_whole-fly_site-specific-recombination_insertion_FBgn0260642_ENCFF716FHU
ENCSR082RBU.Antp.adult_whole-fly_site-specific-recombination_insertion_FBgn0260642	ENCSR082RBU	Antp	FBgn0260642	adult	whole-fly	NA	whole-fly,site-specific-recombination,insertion	FALSE	FALSE	remap2022_ENCSR082RBU.Antp.adult_whole-fly_site-specific-recombination_insertion_FBgn0260642_ENCFF924IVP,remap2022_ENCSR082RBU.Antp.adult_whole-fly_site-specific-recombination_insertion_FBgn0260642_ENCFF194GDT,remap2022_ENCSR082RBU.Antp.adult_whole-fly_site-specific-recombination_insertion_FBgn0260642_ENCFF716FHU
ENCSR082RBU.Antp.adult_whole-fly_site-specific-recombination_insertion_FBgn0260642	ENCSR082RBU	Antp	FBgn0260642	adult	whole-fly	NA	whole-fly,site-specific-recombination,insertion	FALSE	FALSE	remap2022_ENCSR082RBU.Antp.adult_whole-fly_site-specific-recombination_insertion_FBgn0260642_ENCFF924IVP,remap2022_ENCSR082RBU.Antp.adult_whole-fly_site-specific-recombination_insertion_FBgn0260642_ENCFF194GDT,remap2022_ENCSR082RBU.Antp.adult_whole-fly_site-specific-recombination_insertion_FBgn0260642_ENCFF716FHU
ENCSR085FSS.NfI.adult_whole-fly_site-specific-recombination_insertion_FBgn0042696	ENCSR085FSS	NfI	FBgn0042696	adult	whole-fly	NA	whole-fly,site-specific-recombination,insertion	FALSE	FALSE	remap2022_ENCSR085FSS.NfI.adult_whole-fly_site-specific-recombination_insertion_FBgn0042696_ENCFF719REO,remap2022_ENCSR085FSS.NfI.adult_whole-fly_site-specific-recombination_insertion_FBgn0042696_ENCFF588WDQ,remap2022_ENCSR085FSS.NfI.adult_whole-fly_site-specific-recombination_insertion_FBgn0042696_ENCFF750UTQ
ENCSR085FSS.NfI.adult_whole-fly_site-specific-recombination_insertion_FBgn0042696	ENCSR085FSS	NfI	FBgn0042696	adult	whole-fly	NA	whole-fly,site-specific-recombination,insertion	FALSE	FALSE	remap2022_ENCSR085FSS.NfI.adult_whole-fly_site-specific-recombination_insertion_FBgn0042696_ENCFF719REO,remap2022_ENCSR085FSS.NfI.adult_whole-fly_site-specific-recombination_insertion_FBgn0042696_ENCFF588WDQ,remap2022_ENCSR085FSS.NfI.adult_whole-fly_site-specific-recombination_insertion_FBgn0042696_ENCFF750UTQ
ENCSR085FSS.NfI.adult_whole-fly_site-specific-recombination_insertion_FBgn0042696	ENCSR085FSS	NfI	FBgn0042696	adult	whole-fly	NA	whole-fly,site-specific-recombination,insertion	FALSE	FALSE	remap2022_ENCSR085FSS.NfI.adult_whole-fly_site-specific-recombination_insertion_FBgn0042696_ENCFF719REO,remap2022_ENCSR085FSS.NfI.adult_whole-fly_site-specific-recombination_insertion_FBgn0042696_ENCFF588WDQ,remap2022_ENCSR085FSS.NfI.adult_whole-fly_site-specific-recombination_insertion_FBgn0042696_ENCFF750UTQ
ENCSR086JMG.CG8478.adult_whole-fly_FBgn0037746	ENCSR086JMG	CG8478	FBgn0037746	adult	whole-fly	NA	whole-fly	FALSE	FALSE	remap2022_ENCSR086JMG.CG8478.adult_whole-fly_FBgn0037746_ENCFF740VEC,remap2022_ENCSR086JMG.CG8478.adult_whole-fly_FBgn0037746_ENCFF283ANG
ENCSR086JMG.CG8478.adult_whole-fly_FBgn0037746	ENCSR086JMG	CG8478	FBgn0037746	adult	whole-fly	NA	whole-fly	FALSE	FALSE	remap2022_ENCSR086JMG.CG8478.adult_whole-fly_FBgn0037746_ENCFF740VEC,remap2022_ENCSR086JMG.CG8478.adult_whole-fly_FBgn0037746_ENCFF283ANG
ENCSR092TNF.lms.adult_whole-fly_site-specific-recombination_insertion_FBgn0034520	ENCSR092TNF	lms	FBgn0034520	adult	whole-fly	NA	whole-fly,site-specific-recombination,insertion	FALSE	FALSE	remap2022_ENCSR092TNF.lms.adult_whole-fly_site-specific-recombination_insertion_FBgn0034520_ENCFF553CJT,remap2022_ENCSR092TNF.lms.adult_whole-fly_site-specific-recombination_insertion_FBgn0034520_ENCFF350GAE
ENCSR092TNF.lms.adult_whole-fly_site-specific-recombination_insertion_FBgn0034520	ENCSR092TNF	lms	FBgn0034520	adult	whole-fly	NA	whole-fly,site-specific-recombination,insertion	FALSE	FALSE	remap2022_ENCSR092TNF.lms.adult_whole-fly_site-specific-recombination_insertion_FBgn0034520_ENCFF553CJT,remap2022_ENCSR092TNF.lms.adult_whole-fly_site-specific-recombination_insertion_FBgn0034520_ENCFF350GAE
ENCSR094HIY.pad.adult_whole-fly_site-specific-recombination_insertion_FBgn0038418	ENCSR094HIY	pad	FBgn0038418	adult	whole-fly	NA	whole-fly,site-specific-recombination,insertion	FALSE	FALSE	remap2022_ENCSR094HIY.pad.adult_whole-fly_site-specific-recombination_insertion_FBgn0038418_ENCFF368BQI,remap2022_ENCSR094HIY.pad.adult_whole-fly_site-specific-recombination_insertion_FBgn0038418_ENCFF925QFU,remap2022_ENCSR094HIY.pad.adult_whole-fly_site-specific-recombination_insertion_FBgn0038418_ENCFF393TVE
ENCSR094HIY.pad.adult_whole-fly_site-specific-recombination_insertion_FBgn0038418	ENCSR094HIY	pad	FBgn0038418	adult	whole-fly	NA	whole-fly,site-specific-recombination,insertion	FALSE	FALSE	remap2022_ENCSR094HIY.pad.adult_whole-fly_site-specific-recombination_insertion_FBgn0038418_ENCFF368BQI,remap2022_ENCSR094HIY.pad.adult_whole-fly_site-specific-recombination_insertion_FBgn0038418_ENCFF925QFU,remap2022_ENCSR094HIY.pad.adult_whole-fly_site-specific-recombination_insertion_FBgn0038418_ENCFF393TVE
ENCSR094HIY.pad.adult_whole-fly_site-specific-recombination_insertion_FBgn0038418	ENCSR094HIY	pad	FBgn0038418	adult	whole-fly	NA	whole-fly,site-specific-recombination,insertion	FALSE	FALSE	remap2022_ENCSR094HIY.pad.adult_whole-fly_site-specific-recombination_insertion_FBgn0038418_ENCFF368BQI,remap2022_ENCSR094HIY.pad.adult_whole-fly_site-specific-recombination_insertion_FBgn0038418_ENCFF925QFU,remap2022_ENCSR094HIY.pad.adult_whole-fly_site-specific-recombination_insertion_FBgn0038418_ENCFF393TVE
ENCSR097DMR.Chrac-16.adult_whole-fly_site-specific-recombination_insertion_FBgn0043001	ENCSR097DMR	Chrac-16	FBgn0043001	adult	whole-fly	NA	whole-fly,site-specific-recombination,insertion	FALSE	FALSE	remap2022_ENCSR097DMR.Chrac-16.adult_whole-fly_site-specific-recombination_insertion_FBgn0043001_ENCFF477ONZ,remap2022_ENCSR097DMR.Chrac-16.adult_whole-fly_site-specific-recombination_insertion_FBgn0043001_ENCFF674ZNK,remap2022_ENCSR097DMR.Chrac-16.adult_whole-fly_site-specific-recombination_insertion_FBgn0043001_ENCFF918BPW
ENCSR097DMR.Chrac-16.adult_whole-fly_site-specific-recombination_insertion_FBgn0043001	ENCSR097DMR	Chrac-16	FBgn0043001	adult	whole-fly	NA	whole-fly,site-specific-recombination,insertion	FALSE	FALSE	remap2022_ENCSR097DMR.Chrac-16.adult_whole-fly_site-specific-recombination_insertion_FBgn0043001_ENCFF477ONZ,remap2022_ENCSR097DMR.Chrac-16.adult_whole-fly_site-specific-recombination_insertion_FBgn0043001_ENCFF674ZNK,remap2022_ENCSR097DMR.Chrac-16.adult_whole-fly_site-specific-recombination_insertion_FBgn0043001_ENCFF918BPW
ENCSR097DMR.Chrac-16.adult_whole-fly_site-specific-recombination_insertion_FBgn0043001	ENCSR097DMR	Chrac-16	FBgn0043001	adult	whole-fly	NA	whole-fly,site-specific-recombination,insertion	FALSE	FALSE	remap2022_ENCSR097DMR.Chrac-16.adult_whole-fly_site-specific-recombination_insertion_FBgn0043001_ENCFF477ONZ,remap2022_ENCSR097DMR.Chrac-16.adult_whole-fly_site-specific-recombination_insertion_FBgn0043001_ENCFF674ZNK,remap2022_ENCSR097DMR.Chrac-16.adult_whole-fly_site-specific-recombination_insertion_FBgn0043001_ENCFF918BPW
ENCSR098NCP.Dfd.adult_whole-fly_insertion_FBgn0000439	ENCSR098NCP	Dfd	FBgn0000439	adult	whole-fly	NA	whole-fly,insertion	FALSE	FALSE	remap2022_ENCSR098NCP.Dfd.adult_whole-fly_insertion_FBgn0000439_ENCFF413YNX,remap2022_ENCSR098NCP.Dfd.adult_whole-fly_insertion_FBgn0000439_ENCFF710ZQG
ENCSR098NCP.Dfd.adult_whole-fly_insertion_FBgn0000439	ENCSR098NCP	Dfd	FBgn0000439	adult	whole-fly	NA	whole-fly,insertion	FALSE	FALSE	remap2022_ENCSR098NCP.Dfd.adult_whole-fly_insertion_FBgn0000439_ENCFF413YNX,remap2022_ENCSR098NCP.Dfd.adult_whole-fly_insertion_FBgn0000439_ENCFF710ZQG
ENCSR101LNT.CG3065.adult_whole-fly_site-specific-recombination_insertion_FBgn0034946	ENCSR101LNT	CG3065	FBgn0034946	adult	whole-fly	NA	whole-fly,site-specific-recombination,insertion	FALSE	FALSE	remap2022_ENCSR101LNT.CG3065.adult_whole-fly_site-specific-recombination_insertion_FBgn0034946_ENCFF470ZXD,remap2022_ENCSR101LNT.CG3065.adult_whole-fly_site-specific-recombination_insertion_FBgn0034946_ENCFF457NGQ
ENCSR101LNT.CG3065.adult_whole-fly_site-specific-recombination_insertion_FBgn0034946	ENCSR101LNT	CG3065	FBgn0034946	adult	whole-fly	NA	whole-fly,site-specific-recombination,insertion	FALSE	FALSE	remap2022_ENCSR101LNT.CG3065.adult_whole-fly_site-specific-recombination_insertion_FBgn0034946_ENCFF470ZXD,remap2022_ENCSR101LNT.CG3065.adult_whole-fly_site-specific-recombination_insertion_FBgn0034946_ENCFF457NGQ
ENCSR104XOO.trem.adult_whole-fly_site-specific-recombination_insertion_FBgn0038767	ENCSR104XOO	trem	FBgn0038767	adult	whole-fly	NA	whole-fly,site-specific-recombination,insertion	FALSE	FALSE	remap2022_ENCSR104XOO.trem.adult_whole-fly_site-specific-recombination_insertion_FBgn0038767_ENCFF174IOZ,remap2022_ENCSR104XOO.trem.adult_whole-fly_site-specific-recombination_insertion_FBgn0038767_ENCFF907ZDD,remap2022_ENCSR104XOO.trem.adult_whole-fly_site-specific-recombination_insertion_FBgn0038767_ENCFF691FTW
ENCSR104XOO.trem.adult_whole-fly_site-specific-recombination_insertion_FBgn0038767	ENCSR104XOO	trem	FBgn0038767	adult	whole-fly	NA	whole-fly,site-specific-recombination,insertion	FALSE	FALSE	remap2022_ENCSR104XOO.trem.adult_whole-fly_site-specific-recombination_insertion_FBgn0038767_ENCFF174IOZ,remap2022_ENCSR104XOO.trem.adult_whole-fly_site-specific-recombination_insertion_FBgn0038767_ENCFF907ZDD,remap2022_ENCSR104XOO.trem.adult_whole-fly_site-specific-recombination_insertion_FBgn0038767_ENCFF691FTW
ENCSR104XOO.trem.adult_whole-fly_site-specific-recombination_insertion_FBgn0038767	ENCSR104XOO	trem	FBgn0038767	adult	whole-fly	NA	whole-fly,site-specific-recombination,insertion	FALSE	FALSE	remap2022_ENCSR104XOO.trem.adult_whole-fly_site-specific-recombination_insertion_FBgn0038767_ENCFF174IOZ,remap2022_ENCSR104XOO.trem.adult_whole-fly_site-specific-recombination_insertion_FBgn0038767_ENCFF907ZDD,remap2022_ENCSR104XOO.trem.adult_whole-fly_site-specific-recombination_insertion_FBgn0038767_ENCFF691FTW
ENCSR105OGL.pum.adult_whole-fly_site-specific-recombination_insertion_FBgn0003165	ENCSR105OGL	pum	FBgn0003165	adult	whole-fly	NA	whole-fly,site-specific-recombination,insertion	FALSE	FALSE	remap2022_ENCSR105OGL.pum.adult_whole-fly_site-specific-recombination_insertion_FBgn0003165_ENCFF086SAX,remap2022_ENCSR105OGL.pum.adult_whole-fly_site-specific-recombination_insertion_FBgn0003165_ENCFF802PRF
ENCSR105OGL.pum.adult_whole-fly_site-specific-recombination_insertion_FBgn0003165	ENCSR105OGL	pum	FBgn0003165	adult	whole-fly	NA	whole-fly,site-specific-recombination,insertion	FALSE	FALSE	remap2022_ENCSR105OGL.pum.adult_whole-fly_site-specific-recombination_insertion_FBgn0003165_ENCFF086SAX,remap2022_ENCSR105OGL.pum.adult_whole-fly_site-specific-recombination_insertion_FBgn0003165_ENCFF802PRF
ENCSR107VQE.Hr78.adult_whole-fly_insertion_FBgn0015239	ENCSR107VQE	Hr78	FBgn0015239	adult	whole-fly	NA	whole-fly,insertion	FALSE	FALSE	remap2022_ENCSR107VQE.Hr78.adult_whole-fly_insertion_FBgn0015239_ENCFF038RQG,remap2022_ENCSR107VQE.Hr78.adult_whole-fly_insertion_FBgn0015239_ENCFF221WVK
ENCSR107VQE.Hr78.adult_whole-fly_insertion_FBgn0015239	ENCSR107VQE	Hr78	FBgn0015239	adult	whole-fly	NA	whole-fly,insertion	FALSE	FALSE	remap2022_ENCSR107VQE.Hr78.adult_whole-fly_insertion_FBgn0015239_ENCFF038RQG,remap2022_ENCSR107VQE.Hr78.adult_whole-fly_insertion_FBgn0015239_ENCFF221WVK
ENCSR109RMR.tap.adult_whole-fly_site-specific-recombination_insertion_FBgn0015550	ENCSR109RMR	tap	FBgn0015550	adult	whole-fly	NA	whole-fly,site-specific-recombination,insertion	FALSE	FALSE	remap2022_ENCSR109RMR.tap.adult_whole-fly_site-specific-recombination_insertion_FBgn0015550_ENCFF659GRL,remap2022_ENCSR109RMR.tap.adult_whole-fly_site-specific-recombination_insertion_FBgn0015550_ENCFF167FXD,remap2022_ENCSR109RMR.tap.adult_whole-fly_site-specific-recombination_insertion_FBgn0015550_ENCFF593WQS
ENCSR109RMR.tap.adult_whole-fly_site-specific-recombination_insertion_FBgn0015550	ENCSR109RMR	tap	FBgn0015550	adult	whole-fly	NA	whole-fly,site-specific-recombination,insertion	FALSE	FALSE	remap2022_ENCSR109RMR.tap.adult_whole-fly_site-specific-recombination_insertion_FBgn0015550_ENCFF659GRL,remap2022_ENCSR109RMR.tap.adult_whole-fly_site-specific-recombination_insertion_FBgn0015550_ENCFF167FXD,remap2022_ENCSR109RMR.tap.adult_whole-fly_site-specific-recombination_insertion_FBgn0015550_ENCFF593WQS
ENCSR109RMR.tap.adult_whole-fly_site-specific-recombination_insertion_FBgn0015550	ENCSR109RMR	tap	FBgn0015550	adult	whole-fly	NA	whole-fly,site-specific-recombination,insertion	FALSE	FALSE	remap2022_ENCSR109RMR.tap.adult_whole-fly_site-specific-recombination_insertion_FBgn0015550_ENCFF659GRL,remap2022_ENCSR109RMR.tap.adult_whole-fly_site-specific-recombination_insertion_FBgn0015550_ENCFF167FXD,remap2022_ENCSR109RMR.tap.adult_whole-fly_site-specific-recombination_insertion_FBgn0015550_ENCFF593WQS
ENCSR110JFN.schlank.adult_whole-fly_site-specific-recombination_insertion_FBgn0040918	ENCSR110JFN	schlank	FBgn0040918	adult	whole-fly	NA	whole-fly,site-specific-recombination,insertion	FALSE	FALSE	remap2022_ENCSR110JFN.schlank.adult_whole-fly_site-specific-recombination_insertion_FBgn0040918_ENCFF724ALB,remap2022_ENCSR110JFN.schlank.adult_whole-fly_site-specific-recombination_insertion_FBgn0040918_ENCFF376XFZ
ENCSR110JFN.schlank.adult_whole-fly_site-specific-recombination_insertion_FBgn0040918	ENCSR110JFN	schlank	FBgn0040918	adult	whole-fly	NA	whole-fly,site-specific-recombination,insertion	FALSE	FALSE	remap2022_ENCSR110JFN.schlank.adult_whole-fly_site-specific-recombination_insertion_FBgn0040918_ENCFF724ALB,remap2022_ENCSR110JFN.schlank.adult_whole-fly_site-specific-recombination_insertion_FBgn0040918_ENCFF376XFZ
ENCSR110QRS.Dlip3.adult_whole-fly_site-specific-recombination_insertion_FBgn0040465	ENCSR110QRS	Dlip3	FBgn0040465	adult	whole-fly	NA	whole-fly,site-specific-recombination,insertion	FALSE	FALSE	remap2022_ENCSR110QRS.Dlip3.adult_whole-fly_site-specific-recombination_insertion_FBgn0040465_ENCFF441OGL,remap2022_ENCSR110QRS.Dlip3.adult_whole-fly_site-specific-recombination_insertion_FBgn0040465_ENCFF844VJU,remap2022_ENCSR110QRS.Dlip3.adult_whole-fly_site-specific-recombination_insertion_FBgn0040465_ENCFF749YYW
ENCSR110QRS.Dlip3.adult_whole-fly_site-specific-recombination_insertion_FBgn0040465	ENCSR110QRS	Dlip3	FBgn0040465	adult	whole-fly	NA	whole-fly,site-specific-recombination,insertion	FALSE	FALSE	remap2022_ENCSR110QRS.Dlip3.adult_whole-fly_site-specific-recombination_insertion_FBgn0040465_ENCFF441OGL,remap2022_ENCSR110QRS.Dlip3.adult_whole-fly_site-specific-recombination_insertion_FBgn0040465_ENCFF844VJU,remap2022_ENCSR110QRS.Dlip3.adult_whole-fly_site-specific-recombination_insertion_FBgn0040465_ENCFF749YYW
ENCSR110QRS.Dlip3.adult_whole-fly_site-specific-recombination_insertion_FBgn0040465	ENCSR110QRS	Dlip3	FBgn0040465	adult	whole-fly	NA	whole-fly,site-specific-recombination,insertion	FALSE	FALSE	remap2022_ENCSR110QRS.Dlip3.adult_whole-fly_site-specific-recombination_insertion_FBgn0040465_ENCFF441OGL,remap2022_ENCSR110QRS.Dlip3.adult_whole-fly_site-specific-recombination_insertion_FBgn0040465_ENCFF844VJU,remap2022_ENCSR110QRS.Dlip3.adult_whole-fly_site-specific-recombination_insertion_FBgn0040465_ENCFF749YYW
ENCSR118TAH.CG17806.adult_whole-fly_site-specific-recombination_insertion_FBgn0038548	ENCSR118TAH	CG17806	FBgn0038548	adult	whole-fly	NA	whole-fly,site-specific-recombination,insertion	FALSE	FALSE	remap2022_ENCSR118TAH.CG17806.adult_whole-fly_site-specific-recombination_insertion_FBgn0038548_ENCFF933LOP,remap2022_ENCSR118TAH.CG17806.adult_whole-fly_site-specific-recombination_insertion_FBgn0038548_ENCFF246HBS
ENCSR118TAH.CG17806.adult_whole-fly_site-specific-recombination_insertion_FBgn0038548	ENCSR118TAH	CG17806	FBgn0038548	adult	whole-fly	NA	whole-fly,site-specific-recombination,insertion	FALSE	FALSE	remap2022_ENCSR118TAH.CG17806.adult_whole-fly_site-specific-recombination_insertion_FBgn0038548_ENCFF933LOP,remap2022_ENCSR118TAH.CG17806.adult_whole-fly_site-specific-recombination_insertion_FBgn0038548_ENCFF246HBS
ENCSR119OUI.twi.adult_whole-fly_site-specific-recombination_insertion_FBgn0003900	ENCSR119OUI	twi	FBgn0003900	adult	whole-fly	NA	whole-fly,site-specific-recombination,insertion	FALSE	FALSE	remap2022_ENCSR119OUI.twi.adult_whole-fly_site-specific-recombination_insertion_FBgn0003900_ENCFF271FJU,remap2022_ENCSR119OUI.twi.adult_whole-fly_site-specific-recombination_insertion_FBgn0003900_ENCFF918UHG
ENCSR119OUI.twi.adult_whole-fly_site-specific-recombination_insertion_FBgn0003900	ENCSR119OUI	twi	FBgn0003900	adult	whole-fly	NA	whole-fly,site-specific-recombination,insertion	FALSE	FALSE	remap2022_ENCSR119OUI.twi.adult_whole-fly_site-specific-recombination_insertion_FBgn0003900_ENCFF271FJU,remap2022_ENCSR119OUI.twi.adult_whole-fly_site-specific-recombination_insertion_FBgn0003900_ENCFF918UHG
ENCSR120ICM.Dp.adult_whole-fly_site-specific-recombination_insertion_FBgn0011763	ENCSR120ICM	Dp	FBgn0011763	adult	whole-fly	NA	whole-fly,site-specific-recombination,insertion	FALSE	FALSE	remap2022_ENCSR120ICM.Dp.adult_whole-fly_site-specific-recombination_insertion_FBgn0011763_ENCFF289JAC,remap2022_ENCSR120ICM.Dp.adult_whole-fly_site-specific-recombination_insertion_FBgn0011763_ENCFF983YNQ
ENCSR120ICM.Dp.adult_whole-fly_site-specific-recombination_insertion_FBgn0011763	ENCSR120ICM	Dp	FBgn0011763	adult	whole-fly	NA	whole-fly,site-specific-recombination,insertion	FALSE	FALSE	remap2022_ENCSR120ICM.Dp.adult_whole-fly_site-specific-recombination_insertion_FBgn0011763_ENCFF289JAC,remap2022_ENCSR120ICM.Dp.adult_whole-fly_site-specific-recombination_insertion_FBgn0011763_ENCFF983YNQ
ENCSR120TCW.Atf3.adult_whole-fly_site-specific-recombination_insertion_FBgn0028550	ENCSR120TCW	Atf3	FBgn0028550	adult	whole-fly	NA	whole-fly,site-specific-recombination,insertion	FALSE	FALSE	remap2022_ENCSR120TCW.Atf3.adult_whole-fly_site-specific-recombination_insertion_FBgn0028550_ENCFF186DJJ,remap2022_ENCSR120TCW.Atf3.adult_whole-fly_site-specific-recombination_insertion_FBgn0028550_ENCFF603UJL,remap2022_ENCSR120TCW.Atf3.adult_whole-fly_site-specific-recombination_insertion_FBgn0028550_ENCFF657MBU
ENCSR120TCW.Atf3.adult_whole-fly_site-specific-recombination_insertion_FBgn0028550	ENCSR120TCW	Atf3	FBgn0028550	adult	whole-fly	NA	whole-fly,site-specific-recombination,insertion	FALSE	FALSE	remap2022_ENCSR120TCW.Atf3.adult_whole-fly_site-specific-recombination_insertion_FBgn0028550_ENCFF186DJJ,remap2022_ENCSR120TCW.Atf3.adult_whole-fly_site-specific-recombination_insertion_FBgn0028550_ENCFF603UJL,remap2022_ENCSR120TCW.Atf3.adult_whole-fly_site-specific-recombination_insertion_FBgn0028550_ENCFF657MBU
ENCSR120TCW.Atf3.adult_whole-fly_site-specific-recombination_insertion_FBgn0028550	ENCSR120TCW	Atf3	FBgn0028550	adult	whole-fly	NA	whole-fly,site-specific-recombination,insertion	FALSE	FALSE	remap2022_ENCSR120TCW.Atf3.adult_whole-fly_site-specific-recombination_insertion_FBgn0028550_ENCFF186DJJ,remap2022_ENCSR120TCW.Atf3.adult_whole-fly_site-specific-recombination_insertion_FBgn0028550_ENCFF603UJL,remap2022_ENCSR120TCW.Atf3.adult_whole-fly_site-specific-recombination_insertion_FBgn0028550_ENCFF657MBU
ENCSR121SPZ.crp.adult_whole-fly_site-specific-recombination_insertion_FBgn0001994	ENCSR121SPZ	crp	FBgn0001994	adult	whole-fly	NA	whole-fly,site-specific-recombination,insertion	FALSE	FALSE	remap2022_ENCSR121SPZ.crp.adult_whole-fly_site-specific-recombination_insertion_FBgn0001994_ENCFF456SIX,remap2022_ENCSR121SPZ.crp.adult_whole-fly_site-specific-recombination_insertion_FBgn0001994_ENCFF871NRB,remap2022_ENCSR121SPZ.crp.adult_whole-fly_site-specific-recombination_insertion_FBgn0001994_ENCFF318LNW
ENCSR121SPZ.crp.adult_whole-fly_site-specific-recombination_insertion_FBgn0001994	ENCSR121SPZ	crp	FBgn0001994	adult	whole-fly	NA	whole-fly,site-specific-recombination,insertion	FALSE	FALSE	remap2022_ENCSR121SPZ.crp.adult_whole-fly_site-specific-recombination_insertion_FBgn0001994_ENCFF456SIX,remap2022_ENCSR121SPZ.crp.adult_whole-fly_site-specific-recombination_insertion_FBgn0001994_ENCFF871NRB,remap2022_ENCSR121SPZ.crp.adult_whole-fly_site-specific-recombination_insertion_FBgn0001994_ENCFF318LNW
ENCSR121SPZ.crp.adult_whole-fly_site-specific-recombination_insertion_FBgn0001994	ENCSR121SPZ	crp	FBgn0001994	adult	whole-fly	NA	whole-fly,site-specific-recombination,insertion	FALSE	FALSE	remap2022_ENCSR121SPZ.crp.adult_whole-fly_site-specific-recombination_insertion_FBgn0001994_ENCFF456SIX,remap2022_ENCSR121SPZ.crp.adult_whole-fly_site-specific-recombination_insertion_FBgn0001994_ENCFF871NRB,remap2022_ENCSR121SPZ.crp.adult_whole-fly_site-specific-recombination_insertion_FBgn0001994_ENCFF318LNW
ENCSR122VFA.fd3F.adult_whole-fly_site-specific-recombination_insertion_FBgn0264954	ENCSR122VFA	fd3F	FBgn0264954	adult	whole-fly	NA	whole-fly,site-specific-recombination,insertion	FALSE	FALSE	remap2022_ENCSR122VFA.fd3F.adult_whole-fly_site-specific-recombination_insertion_FBgn0264954_ENCFF228BHU,remap2022_ENCSR122VFA.fd3F.adult_whole-fly_site-specific-recombination_insertion_FBgn0264954_ENCFF640DWF
ENCSR122VFA.fd3F.adult_whole-fly_site-specific-recombination_insertion_FBgn0264954	ENCSR122VFA	fd3F	FBgn0264954	adult	whole-fly	NA	whole-fly,site-specific-recombination,insertion	FALSE	FALSE	remap2022_ENCSR122VFA.fd3F.adult_whole-fly_site-specific-recombination_insertion_FBgn0264954_ENCFF228BHU,remap2022_ENCSR122VFA.fd3F.adult_whole-fly_site-specific-recombination_insertion_FBgn0264954_ENCFF640DWF
ENCSR125CNZ.D19A.adult_whole-fly_site-specific-recombination_insertion_FBgn0022935	ENCSR125CNZ	D19A	FBgn0022935	adult	whole-fly	NA	whole-fly,site-specific-recombination,insertion	FALSE	FALSE	remap2022_ENCSR125CNZ.D19A.adult_whole-fly_site-specific-recombination_insertion_FBgn0022935_ENCFF866FNZ,remap2022_ENCSR125CNZ.D19A.adult_whole-fly_site-specific-recombination_insertion_FBgn0022935_ENCFF931MCU,remap2022_ENCSR125CNZ.D19A.adult_whole-fly_site-specific-recombination_insertion_FBgn0022935_ENCFF264KAP
ENCSR125CNZ.D19A.adult_whole-fly_site-specific-recombination_insertion_FBgn0022935	ENCSR125CNZ	D19A	FBgn0022935	adult	whole-fly	NA	whole-fly,site-specific-recombination,insertion	FALSE	FALSE	remap2022_ENCSR125CNZ.D19A.adult_whole-fly_site-specific-recombination_insertion_FBgn0022935_ENCFF866FNZ,remap2022_ENCSR125CNZ.D19A.adult_whole-fly_site-specific-recombination_insertion_FBgn0022935_ENCFF931MCU,remap2022_ENCSR125CNZ.D19A.adult_whole-fly_site-specific-recombination_insertion_FBgn0022935_ENCFF264KAP
ENCSR125CNZ.D19A.adult_whole-fly_site-specific-recombination_insertion_FBgn0022935	ENCSR125CNZ	D19A	FBgn0022935	adult	whole-fly	NA	whole-fly,site-specific-recombination,insertion	FALSE	FALSE	remap2022_ENCSR125CNZ.D19A.adult_whole-fly_site-specific-recombination_insertion_FBgn0022935_ENCFF866FNZ,remap2022_ENCSR125CNZ.D19A.adult_whole-fly_site-specific-recombination_insertion_FBgn0022935_ENCFF931MCU,remap2022_ENCSR125CNZ.D19A.adult_whole-fly_site-specific-recombination_insertion_FBgn0022935_ENCFF264KAP
ENCSR125NWX.nmo.adult_whole-fly_site-specific-recombination_insertion_FBgn0011817	ENCSR125NWX	nmo	FBgn0011817	adult	whole-fly	NA	whole-fly,site-specific-recombination,insertion	FALSE	FALSE	remap2022_ENCSR125NWX.nmo.adult_whole-fly_site-specific-recombination_insertion_FBgn0011817_ENCFF406WWA,remap2022_ENCSR125NWX.nmo.adult_whole-fly_site-specific-recombination_insertion_FBgn0011817_ENCFF168FZL
ENCSR125NWX.nmo.adult_whole-fly_site-specific-recombination_insertion_FBgn0011817	ENCSR125NWX	nmo	FBgn0011817	adult	whole-fly	NA	whole-fly,site-specific-recombination,insertion	FALSE	FALSE	remap2022_ENCSR125NWX.nmo.adult_whole-fly_site-specific-recombination_insertion_FBgn0011817_ENCFF406WWA,remap2022_ENCSR125NWX.nmo.adult_whole-fly_site-specific-recombination_insertion_FBgn0011817_ENCFF168FZL
ENCSR128VHN.dsx.adult_whole-fly_site-specific-recombination_insertion_FBgn0000504	ENCSR128VHN	dsx	FBgn0000504	adult	whole-fly	NA	whole-fly,site-specific-recombination,insertion	FALSE	FALSE	remap2022_ENCSR128VHN.dsx.adult_whole-fly_site-specific-recombination_insertion_FBgn0000504_ENCFF863UPI,remap2022_ENCSR128VHN.dsx.adult_whole-fly_site-specific-recombination_insertion_FBgn0000504_ENCFF799SHJ,remap2022_ENCSR128VHN.dsx.adult_whole-fly_site-specific-recombination_insertion_FBgn0000504_ENCFF683XVV,remap2022_ENCSR128VHN.dsx.adult_whole-fly_site-specific-recombination_insertion_FBgn000…
ENCSR128VHN.dsx.adult_whole-fly_site-specific-recombination_insertion_FBgn0000504	ENCSR128VHN	dsx	FBgn0000504	adult	whole-fly	NA	whole-fly,site-specific-recombination,insertion	FALSE	FALSE	remap2022_ENCSR128VHN.dsx.adult_whole-fly_site-specific-recombination_insertion_FBgn0000504_ENCFF863UPI,remap2022_ENCSR128VHN.dsx.adult_whole-fly_site-specific-recombination_insertion_FBgn0000504_ENCFF799SHJ,remap2022_ENCSR128VHN.dsx.adult_whole-fly_site-specific-recombination_insertion_FBgn0000504_ENCFF683XVV,remap2022_ENCSR128VHN.dsx.adult_whole-fly_site-specific-recombination_insertion_FBgn000…
ENCSR128VHN.dsx.adult_whole-fly_site-specific-recombination_insertion_FBgn0000504	ENCSR128VHN	dsx	FBgn0000504	adult	whole-fly	NA	whole-fly,site-specific-recombination,insertion	FALSE	FALSE	remap2022_ENCSR128VHN.dsx.adult_whole-fly_site-specific-recombination_insertion_FBgn0000504_ENCFF863UPI,remap2022_ENCSR128VHN.dsx.adult_whole-fly_site-specific-recombination_insertion_FBgn0000504_ENCFF799SHJ,remap2022_ENCSR128VHN.dsx.adult_whole-fly_site-specific-recombination_insertion_FBgn0000504_ENCFF683XVV,remap2022_ENCSR128VHN.dsx.adult_whole-fly_site-specific-recombination_insertion_FBgn000…
ENCSR128VHN.dsx.adult_whole-fly_site-specific-recombination_insertion_FBgn0000504	ENCSR128VHN	dsx	FBgn0000504	adult	whole-fly	NA	whole-fly,site-specific-recombination,insertion	FALSE	FALSE	remap2022_ENCSR128VHN.dsx.adult_whole-fly_site-specific-recombination_insertion_FBgn0000504_ENCFF863UPI,remap2022_ENCSR128VHN.dsx.adult_whole-fly_site-specific-recombination_insertion_FBgn0000504_ENCFF799SHJ,remap2022_ENCSR128VHN.dsx.adult_whole-fly_site-specific-recombination_insertion_FBgn0000504_ENCFF683XVV,remap2022_ENCSR128VHN.dsx.adult_whole-fly_site-specific-recombination_insertion_FBgn000…
ENCSR132VFF.CG9948.adult_whole-fly_site-specific-recombination_insertion_FBgn0035721	ENCSR132VFF	CG9948	FBgn0035721	adult	whole-fly	NA	whole-fly,site-specific-recombination,insertion	FALSE	FALSE	remap2022_ENCSR132VFF.CG9948.adult_whole-fly_site-specific-recombination_insertion_FBgn0035721_ENCFF968QIJ,remap2022_ENCSR132VFF.CG9948.adult_whole-fly_site-specific-recombination_insertion_FBgn0035721_ENCFF610SMK
ENCSR132VFF.CG9948.adult_whole-fly_site-specific-recombination_insertion_FBgn0035721	ENCSR132VFF	CG9948	FBgn0035721	adult	whole-fly	NA	whole-fly,site-specific-recombination,insertion	FALSE	FALSE	remap2022_ENCSR132VFF.CG9948.adult_whole-fly_site-specific-recombination_insertion_FBgn0035721_ENCFF968QIJ,remap2022_ENCSR132VFF.CG9948.adult_whole-fly_site-specific-recombination_insertion_FBgn0035721_ENCFF610SMK
ENCSR132XDY.CG6654.adult_whole-fly_site-specific-recombination_insertion_FBgn0038301	ENCSR132XDY	CG6654	FBgn0038301	adult	whole-fly	NA	whole-fly,site-specific-recombination,insertion	FALSE	FALSE	remap2022_ENCSR132XDY.CG6654.adult_whole-fly_site-specific-recombination_insertion_FBgn0038301_ENCFF966VQA,remap2022_ENCSR132XDY.CG6654.adult_whole-fly_site-specific-recombination_insertion_FBgn0038301_ENCFF178YXS
ENCSR132XDY.CG6654.adult_whole-fly_site-specific-recombination_insertion_FBgn0038301	ENCSR132XDY	CG6654	FBgn0038301	adult	whole-fly	NA	whole-fly,site-specific-recombination,insertion	FALSE	FALSE	remap2022_ENCSR132XDY.CG6654.adult_whole-fly_site-specific-recombination_insertion_FBgn0038301_ENCFF966VQA,remap2022_ENCSR132XDY.CG6654.adult_whole-fly_site-specific-recombination_insertion_FBgn0038301_ENCFF178YXS
ENCSR134NKA.Nf-YB.adult_whole-fly_site-specific-recombination_insertion_FBgn0032816	ENCSR134NKA	Nf-YB	FBgn0032816	adult	whole-fly	NA	whole-fly,site-specific-recombination,insertion	FALSE	FALSE	remap2022_ENCSR134NKA.Nf-YB.adult_whole-fly_site-specific-recombination_insertion_FBgn0032816_ENCFF506CBC,remap2022_ENCSR134NKA.Nf-YB.adult_whole-fly_site-specific-recombination_insertion_FBgn0032816_ENCFF134LZX,remap2022_ENCSR134NKA.Nf-YB.adult_whole-fly_site-specific-recombination_insertion_FBgn0032816_ENCFF237VLI
ENCSR134NKA.Nf-YB.adult_whole-fly_site-specific-recombination_insertion_FBgn0032816	ENCSR134NKA	Nf-YB	FBgn0032816	adult	whole-fly	NA	whole-fly,site-specific-recombination,insertion	FALSE	FALSE	remap2022_ENCSR134NKA.Nf-YB.adult_whole-fly_site-specific-recombination_insertion_FBgn0032816_ENCFF506CBC,remap2022_ENCSR134NKA.Nf-YB.adult_whole-fly_site-specific-recombination_insertion_FBgn0032816_ENCFF134LZX,remap2022_ENCSR134NKA.Nf-YB.adult_whole-fly_site-specific-recombination_insertion_FBgn0032816_ENCFF237VLI
ENCSR134NKA.Nf-YB.adult_whole-fly_site-specific-recombination_insertion_FBgn0032816	ENCSR134NKA	Nf-YB	FBgn0032816	adult	whole-fly	NA	whole-fly,site-specific-recombination,insertion	FALSE	FALSE	remap2022_ENCSR134NKA.Nf-YB.adult_whole-fly_site-specific-recombination_insertion_FBgn0032816_ENCFF506CBC,remap2022_ENCSR134NKA.Nf-YB.adult_whole-fly_site-specific-recombination_insertion_FBgn0032816_ENCFF134LZX,remap2022_ENCSR134NKA.Nf-YB.adult_whole-fly_site-specific-recombination_insertion_FBgn0032816_ENCFF237VLI
ENCSR138MDE.Rel.adult_whole-fly_site-specific-recombination_insertion_FBgn0014018	ENCSR138MDE	Rel	FBgn0014018	adult	whole-fly	NA	whole-fly,site-specific-recombination,insertion	FALSE	FALSE	remap2022_ENCSR138MDE.Rel.adult_whole-fly_site-specific-recombination_insertion_FBgn0014018_ENCFF099MUT,remap2022_ENCSR138MDE.Rel.adult_whole-fly_site-specific-recombination_insertion_FBgn0014018_ENCFF809BMV,remap2022_ENCSR138MDE.Rel.adult_whole-fly_site-specific-recombination_insertion_FBgn0014018_ENCFF806IYZ
ENCSR138MDE.Rel.adult_whole-fly_site-specific-recombination_insertion_FBgn0014018	ENCSR138MDE	Rel	FBgn0014018	adult	whole-fly	NA	whole-fly,site-specific-recombination,insertion	FALSE	FALSE	remap2022_ENCSR138MDE.Rel.adult_whole-fly_site-specific-recombination_insertion_FBgn0014018_ENCFF099MUT,remap2022_ENCSR138MDE.Rel.adult_whole-fly_site-specific-recombination_insertion_FBgn0014018_ENCFF809BMV,remap2022_ENCSR138MDE.Rel.adult_whole-fly_site-specific-recombination_insertion_FBgn0014018_ENCFF806IYZ
ENCSR138MDE.Rel.adult_whole-fly_site-specific-recombination_insertion_FBgn0014018	ENCSR138MDE	Rel	FBgn0014018	adult	whole-fly	NA	whole-fly,site-specific-recombination,insertion	FALSE	FALSE	remap2022_ENCSR138MDE.Rel.adult_whole-fly_site-specific-recombination_insertion_FBgn0014018_ENCFF099MUT,remap2022_ENCSR138MDE.Rel.adult_whole-fly_site-specific-recombination_insertion_FBgn0014018_ENCFF809BMV,remap2022_ENCSR138MDE.Rel.adult_whole-fly_site-specific-recombination_insertion_FBgn0014018_ENCFF806IYZ
ENCSR139BJY.Oli.adult_whole-fly_site-specific-recombination_insertion_FBgn0032651	ENCSR139BJY	Oli	FBgn0032651	adult	whole-fly	NA	whole-fly,site-specific-recombination,insertion	FALSE	FALSE	remap2022_ENCSR139BJY.Oli.adult_whole-fly_site-specific-recombination_insertion_FBgn0032651_ENCFF523XFJ,remap2022_ENCSR139BJY.Oli.adult_whole-fly_site-specific-recombination_insertion_FBgn0032651_ENCFF292NZO
ENCSR139BJY.Oli.adult_whole-fly_site-specific-recombination_insertion_FBgn0032651	ENCSR139BJY	Oli	FBgn0032651	adult	whole-fly	NA	whole-fly,site-specific-recombination,insertion	FALSE	FALSE	remap2022_ENCSR139BJY.Oli.adult_whole-fly_site-specific-recombination_insertion_FBgn0032651_ENCFF523XFJ,remap2022_ENCSR139BJY.Oli.adult_whole-fly_site-specific-recombination_insertion_FBgn0032651_ENCFF292NZO
ENCSR139RDU.CG12942.adult_whole-fly_site-specific-recombination_insertion_FBgn0033569	ENCSR139RDU	CG12942	FBgn0033569	adult	whole-fly	NA	whole-fly,site-specific-recombination,insertion	FALSE	FALSE	remap2022_ENCSR139RDU.CG12942.adult_whole-fly_site-specific-recombination_insertion_FBgn0033569_ENCFF586EJV,remap2022_ENCSR139RDU.CG12942.adult_whole-fly_site-specific-recombination_insertion_FBgn0033569_ENCFF160YTN,remap2022_ENCSR139RDU.CG12942.adult_whole-fly_site-specific-recombination_insertion_FBgn0033569_ENCFF954MKF
ENCSR139RDU.CG12942.adult_whole-fly_site-specific-recombination_insertion_FBgn0033569	ENCSR139RDU	CG12942	FBgn0033569	adult	whole-fly	NA	whole-fly,site-specific-recombination,insertion	FALSE	FALSE	remap2022_ENCSR139RDU.CG12942.adult_whole-fly_site-specific-recombination_insertion_FBgn0033569_ENCFF586EJV,remap2022_ENCSR139RDU.CG12942.adult_whole-fly_site-specific-recombination_insertion_FBgn0033569_ENCFF160YTN,remap2022_ENCSR139RDU.CG12942.adult_whole-fly_site-specific-recombination_insertion_FBgn0033569_ENCFF954MKF
ENCSR139RDU.CG12942.adult_whole-fly_site-specific-recombination_insertion_FBgn0033569	ENCSR139RDU	CG12942	FBgn0033569	adult	whole-fly	NA	whole-fly,site-specific-recombination,insertion	FALSE	FALSE	remap2022_ENCSR139RDU.CG12942.adult_whole-fly_site-specific-recombination_insertion_FBgn0033569_ENCFF586EJV,remap2022_ENCSR139RDU.CG12942.adult_whole-fly_site-specific-recombination_insertion_FBgn0033569_ENCFF160YTN,remap2022_ENCSR139RDU.CG12942.adult_whole-fly_site-specific-recombination_insertion_FBgn0033569_ENCFF954MKF
ENCSR140RMO.ab.adult_whole-fly_site-specific-recombination_insertion_FBgn0264442	ENCSR140RMO	ab	FBgn0264442	adult	whole-fly	NA	whole-fly,site-specific-recombination,insertion	FALSE	FALSE	remap2022_ENCSR140RMO.ab.adult_whole-fly_site-specific-recombination_insertion_FBgn0264442_ENCFF704KSP,remap2022_ENCSR140RMO.ab.adult_whole-fly_site-specific-recombination_insertion_FBgn0264442_ENCFF856USM
ENCSR140RMO.ab.adult_whole-fly_site-specific-recombination_insertion_FBgn0264442	ENCSR140RMO	ab	FBgn0264442	adult	whole-fly	NA	whole-fly,site-specific-recombination,insertion	FALSE	FALSE	remap2022_ENCSR140RMO.ab.adult_whole-fly_site-specific-recombination_insertion_FBgn0264442_ENCFF704KSP,remap2022_ENCSR140RMO.ab.adult_whole-fly_site-specific-recombination_insertion_FBgn0264442_ENCFF856USM
ENCSR141ZKI.CG1647.adult_whole-fly_site-specific-recombination_insertion_FBgn0039602	ENCSR141ZKI	CG1647	FBgn0039602	adult	whole-fly	NA	whole-fly,site-specific-recombination,insertion	FALSE	FALSE	remap2022_ENCSR141ZKI.CG1647.adult_whole-fly_site-specific-recombination_insertion_FBgn0039602_ENCFF074BSF,remap2022_ENCSR141ZKI.CG1647.adult_whole-fly_site-specific-recombination_insertion_FBgn0039602_ENCFF513ZDW,remap2022_ENCSR141ZKI.CG1647.adult_whole-fly_site-specific-recombination_insertion_FBgn0039602_ENCFF756SJQ
ENCSR141ZKI.CG1647.adult_whole-fly_site-specific-recombination_insertion_FBgn0039602	ENCSR141ZKI	CG1647	FBgn0039602	adult	whole-fly	NA	whole-fly,site-specific-recombination,insertion	FALSE	FALSE	remap2022_ENCSR141ZKI.CG1647.adult_whole-fly_site-specific-recombination_insertion_FBgn0039602_ENCFF074BSF,remap2022_ENCSR141ZKI.CG1647.adult_whole-fly_site-specific-recombination_insertion_FBgn0039602_ENCFF513ZDW,remap2022_ENCSR141ZKI.CG1647.adult_whole-fly_site-specific-recombination_insertion_FBgn0039602_ENCFF756SJQ
ENCSR141ZKI.CG1647.adult_whole-fly_site-specific-recombination_insertion_FBgn0039602	ENCSR141ZKI	CG1647	FBgn0039602	adult	whole-fly	NA	whole-fly,site-specific-recombination,insertion	FALSE	FALSE	remap2022_ENCSR141ZKI.CG1647.adult_whole-fly_site-specific-recombination_insertion_FBgn0039602_ENCFF074BSF,remap2022_ENCSR141ZKI.CG1647.adult_whole-fly_site-specific-recombination_insertion_FBgn0039602_ENCFF513ZDW,remap2022_ENCSR141ZKI.CG1647.adult_whole-fly_site-specific-recombination_insertion_FBgn0039602_ENCFF756SJQ
ENCSR143AWF.CG18262.adult_whole-fly_site-specific-recombination_insertion_FBgn0030012	ENCSR143AWF	CG18262	FBgn0030012	adult	whole-fly	NA	whole-fly,site-specific-recombination,insertion	FALSE	FALSE	remap2022_ENCSR143AWF.CG18262.adult_whole-fly_site-specific-recombination_insertion_FBgn0030012_ENCFF850PBF,remap2022_ENCSR143AWF.CG18262.adult_whole-fly_site-specific-recombination_insertion_FBgn0030012_ENCFF614FQK,remap2022_ENCSR143AWF.CG18262.adult_whole-fly_site-specific-recombination_insertion_FBgn0030012_ENCFF918TTA
ENCSR143AWF.CG18262.adult_whole-fly_site-specific-recombination_insertion_FBgn0030012	ENCSR143AWF	CG18262	FBgn0030012	adult	whole-fly	NA	whole-fly,site-specific-recombination,insertion	FALSE	FALSE	remap2022_ENCSR143AWF.CG18262.adult_whole-fly_site-specific-recombination_insertion_FBgn0030012_ENCFF850PBF,remap2022_ENCSR143AWF.CG18262.adult_whole-fly_site-specific-recombination_insertion_FBgn0030012_ENCFF614FQK,remap2022_ENCSR143AWF.CG18262.adult_whole-fly_site-specific-recombination_insertion_FBgn0030012_ENCFF918TTA
ENCSR143AWF.CG18262.adult_whole-fly_site-specific-recombination_insertion_FBgn0030012	ENCSR143AWF	CG18262	FBgn0030012	adult	whole-fly	NA	whole-fly,site-specific-recombination,insertion	FALSE	FALSE	remap2022_ENCSR143AWF.CG18262.adult_whole-fly_site-specific-recombination_insertion_FBgn0030012_ENCFF850PBF,remap2022_ENCSR143AWF.CG18262.adult_whole-fly_site-specific-recombination_insertion_FBgn0030012_ENCFF614FQK,remap2022_ENCSR143AWF.CG18262.adult_whole-fly_site-specific-recombination_insertion_FBgn0030012_ENCFF918TTA
ENCSR149KUC.CG12155.adult_whole-fly_site-specific-recombination_insertion_FBgn0029957	ENCSR149KUC	CG12155	FBgn0029957	adult	whole-fly	NA	whole-fly,site-specific-recombination,insertion	FALSE	FALSE	remap2022_ENCSR149KUC.CG12155.adult_whole-fly_site-specific-recombination_insertion_FBgn0029957_ENCFF734WBG,remap2022_ENCSR149KUC.CG12155.adult_whole-fly_site-specific-recombination_insertion_FBgn0029957_ENCFF488FMQ,remap2022_ENCSR149KUC.CG12155.adult_whole-fly_site-specific-recombination_insertion_FBgn0029957_ENCFF095TYY
ENCSR149KUC.CG12155.adult_whole-fly_site-specific-recombination_insertion_FBgn0029957	ENCSR149KUC	CG12155	FBgn0029957	adult	whole-fly	NA	whole-fly,site-specific-recombination,insertion	FALSE	FALSE	remap2022_ENCSR149KUC.CG12155.adult_whole-fly_site-specific-recombination_insertion_FBgn0029957_ENCFF734WBG,remap2022_ENCSR149KUC.CG12155.adult_whole-fly_site-specific-recombination_insertion_FBgn0029957_ENCFF488FMQ,remap2022_ENCSR149KUC.CG12155.adult_whole-fly_site-specific-recombination_insertion_FBgn0029957_ENCFF095TYY
ENCSR149KUC.CG12155.adult_whole-fly_site-specific-recombination_insertion_FBgn0029957	ENCSR149KUC	CG12155	FBgn0029957	adult	whole-fly	NA	whole-fly,site-specific-recombination,insertion	FALSE	FALSE	remap2022_ENCSR149KUC.CG12155.adult_whole-fly_site-specific-recombination_insertion_FBgn0029957_ENCFF734WBG,remap2022_ENCSR149KUC.CG12155.adult_whole-fly_site-specific-recombination_insertion_FBgn0029957_ENCFF488FMQ,remap2022_ENCSR149KUC.CG12155.adult_whole-fly_site-specific-recombination_insertion_FBgn0029957_ENCFF095TYY
ENCSR150QNB.Eip74EF.adult_whole-fly_insertion_FBgn0000567	ENCSR150QNB	Eip74EF	FBgn0000567	adult	whole-fly	NA	whole-fly,insertion	FALSE	FALSE	remap2022_ENCSR150QNB.Eip74EF.adult_whole-fly_insertion_FBgn0000567_ENCFF645OUO,remap2022_ENCSR150QNB.Eip74EF.adult_whole-fly_insertion_FBgn0000567_ENCFF674PYP
ENCSR150QNB.Eip74EF.adult_whole-fly_insertion_FBgn0000567	ENCSR150QNB	Eip74EF	FBgn0000567	adult	whole-fly	NA	whole-fly,insertion	FALSE	FALSE	remap2022_ENCSR150QNB.Eip74EF.adult_whole-fly_insertion_FBgn0000567_ENCFF645OUO,remap2022_ENCSR150QNB.Eip74EF.adult_whole-fly_insertion_FBgn0000567_ENCFF674PYP
ENCSR151WSI.CG30403.adult_whole-fly_site-specific-recombination_insertion_FBgn0050403	ENCSR151WSI	CG30403	FBgn0050403	adult	whole-fly	NA	whole-fly,site-specific-recombination,insertion	FALSE	FALSE	remap2022_ENCSR151WSI.CG30403.adult_whole-fly_site-specific-recombination_insertion_FBgn0050403_ENCFF900UGO,remap2022_ENCSR151WSI.CG30403.adult_whole-fly_site-specific-recombination_insertion_FBgn0050403_ENCFF222OPI,remap2022_ENCSR151WSI.CG30403.adult_whole-fly_site-specific-recombination_insertion_FBgn0050403_ENCFF118FZH
ENCSR151WSI.CG30403.adult_whole-fly_site-specific-recombination_insertion_FBgn0050403	ENCSR151WSI	CG30403	FBgn0050403	adult	whole-fly	NA	whole-fly,site-specific-recombination,insertion	FALSE	FALSE	remap2022_ENCSR151WSI.CG30403.adult_whole-fly_site-specific-recombination_insertion_FBgn0050403_ENCFF900UGO,remap2022_ENCSR151WSI.CG30403.adult_whole-fly_site-specific-recombination_insertion_FBgn0050403_ENCFF222OPI,remap2022_ENCSR151WSI.CG30403.adult_whole-fly_site-specific-recombination_insertion_FBgn0050403_ENCFF118FZH
ENCSR151WSI.CG30403.adult_whole-fly_site-specific-recombination_insertion_FBgn0050403	ENCSR151WSI	CG30403	FBgn0050403	adult	whole-fly	NA	whole-fly,site-specific-recombination,insertion	FALSE	FALSE	remap2022_ENCSR151WSI.CG30403.adult_whole-fly_site-specific-recombination_insertion_FBgn0050403_ENCFF900UGO,remap2022_ENCSR151WSI.CG30403.adult_whole-fly_site-specific-recombination_insertion_FBgn0050403_ENCFF222OPI,remap2022_ENCSR151WSI.CG30403.adult_whole-fly_site-specific-recombination_insertion_FBgn0050403_ENCFF118FZH
ENCSR153KTS.trh.adult_whole-fly_site-specific-recombination_insertion_FBgn0262139	ENCSR153KTS	trh	FBgn0262139	adult	whole-fly	NA	whole-fly,site-specific-recombination,insertion	FALSE	FALSE	remap2022_ENCSR153KTS.trh.adult_whole-fly_site-specific-recombination_insertion_FBgn0262139_ENCFF479LGT,remap2022_ENCSR153KTS.trh.adult_whole-fly_site-specific-recombination_insertion_FBgn0262139_ENCFF334EBW
ENCSR153KTS.trh.adult_whole-fly_site-specific-recombination_insertion_FBgn0262139	ENCSR153KTS	trh	FBgn0262139	adult	whole-fly	NA	whole-fly,site-specific-recombination,insertion	FALSE	FALSE	remap2022_ENCSR153KTS.trh.adult_whole-fly_site-specific-recombination_insertion_FBgn0262139_ENCFF479LGT,remap2022_ENCSR153KTS.trh.adult_whole-fly_site-specific-recombination_insertion_FBgn0262139_ENCFF334EBW
ENCSR155JVI.Trl.adult_whole-fly_FBgn0013263	ENCSR155JVI	Trl	FBgn0013263	adult	whole-fly	NA	whole-fly	FALSE	FALSE	remap2022_ENCSR155JVI.Trl.adult_whole-fly_FBgn0013263_ENCFF774DMR,remap2022_ENCSR155JVI.Trl.adult_whole-fly_FBgn0013263_ENCFF972MOP,remap2022_ENCSR155JVI.Trl.adult_whole-fly_FBgn0013263_ENCFF064WSL
ENCSR155JVI.Trl.adult_whole-fly_FBgn0013263	ENCSR155JVI	Trl	FBgn0013263	adult	whole-fly	NA	whole-fly	FALSE	FALSE	remap2022_ENCSR155JVI.Trl.adult_whole-fly_FBgn0013263_ENCFF774DMR,remap2022_ENCSR155JVI.Trl.adult_whole-fly_FBgn0013263_ENCFF972MOP,remap2022_ENCSR155JVI.Trl.adult_whole-fly_FBgn0013263_ENCFF064WSL
ENCSR155JVI.Trl.adult_whole-fly_FBgn0013263	ENCSR155JVI	Trl	FBgn0013263	adult	whole-fly	NA	whole-fly	FALSE	FALSE	remap2022_ENCSR155JVI.Trl.adult_whole-fly_FBgn0013263_ENCFF774DMR,remap2022_ENCSR155JVI.Trl.adult_whole-fly_FBgn0013263_ENCFF972MOP,remap2022_ENCSR155JVI.Trl.adult_whole-fly_FBgn0013263_ENCFF064WSL
ENCSR155UQM.CG10979.adult_whole-fly_site-specific-recombination_insertion_FBgn0037379	ENCSR155UQM	CG10979	FBgn0037379	adult	whole-fly	NA	whole-fly,site-specific-recombination,insertion	FALSE	FALSE	remap2022_ENCSR155UQM.CG10979.adult_whole-fly_site-specific-recombination_insertion_FBgn0037379_ENCFF392RNT,remap2022_ENCSR155UQM.CG10979.adult_whole-fly_site-specific-recombination_insertion_FBgn0037379_ENCFF280GSO
ENCSR155UQM.CG10979.adult_whole-fly_site-specific-recombination_insertion_FBgn0037379	ENCSR155UQM	CG10979	FBgn0037379	adult	whole-fly	NA	whole-fly,site-specific-recombination,insertion	FALSE	FALSE	remap2022_ENCSR155UQM.CG10979.adult_whole-fly_site-specific-recombination_insertion_FBgn0037379_ENCFF392RNT,remap2022_ENCSR155UQM.CG10979.adult_whole-fly_site-specific-recombination_insertion_FBgn0037379_ENCFF280GSO
ENCSR156QJC.Kr.adult_whole-fly_site-specific-recombination_insertion_FBgn0001325	ENCSR156QJC	Kr	FBgn0001325	adult	whole-fly	NA	whole-fly,site-specific-recombination,insertion	FALSE	FALSE	remap2022_ENCSR156QJC.Kr.adult_whole-fly_site-specific-recombination_insertion_FBgn0001325_ENCFF267FIR,remap2022_ENCSR156QJC.Kr.adult_whole-fly_site-specific-recombination_insertion_FBgn0001325_ENCFF635AOG
ENCSR156QJC.Kr.adult_whole-fly_site-specific-recombination_insertion_FBgn0001325	ENCSR156QJC	Kr	FBgn0001325	adult	whole-fly	NA	whole-fly,site-specific-recombination,insertion	FALSE	FALSE	remap2022_ENCSR156QJC.Kr.adult_whole-fly_site-specific-recombination_insertion_FBgn0001325_ENCFF267FIR,remap2022_ENCSR156QJC.Kr.adult_whole-fly_site-specific-recombination_insertion_FBgn0001325_ENCFF635AOG
ENCSR161OBF.Mabi.adult_whole-fly_site-specific-recombination_insertion_FBgn0032493	ENCSR161OBF	Mabi	FBgn0032493	adult	whole-fly	NA	whole-fly,site-specific-recombination,insertion	FALSE	FALSE	remap2022_ENCSR161OBF.Mabi.adult_whole-fly_site-specific-recombination_insertion_FBgn0032493_ENCFF275UZZ,remap2022_ENCSR161OBF.Mabi.adult_whole-fly_site-specific-recombination_insertion_FBgn0032493_ENCFF731XBC,remap2022_ENCSR161OBF.Mabi.adult_whole-fly_site-specific-recombination_insertion_FBgn0032493_ENCFF846FAS
ENCSR161OBF.Mabi.adult_whole-fly_site-specific-recombination_insertion_FBgn0032493	ENCSR161OBF	Mabi	FBgn0032493	adult	whole-fly	NA	whole-fly,site-specific-recombination,insertion	FALSE	FALSE	remap2022_ENCSR161OBF.Mabi.adult_whole-fly_site-specific-recombination_insertion_FBgn0032493_ENCFF275UZZ,remap2022_ENCSR161OBF.Mabi.adult_whole-fly_site-specific-recombination_insertion_FBgn0032493_ENCFF731XBC,remap2022_ENCSR161OBF.Mabi.adult_whole-fly_site-specific-recombination_insertion_FBgn0032493_ENCFF846FAS
ENCSR161OBF.Mabi.adult_whole-fly_site-specific-recombination_insertion_FBgn0032493	ENCSR161OBF	Mabi	FBgn0032493	adult	whole-fly	NA	whole-fly,site-specific-recombination,insertion	FALSE	FALSE	remap2022_ENCSR161OBF.Mabi.adult_whole-fly_site-specific-recombination_insertion_FBgn0032493_ENCFF275UZZ,remap2022_ENCSR161OBF.Mabi.adult_whole-fly_site-specific-recombination_insertion_FBgn0032493_ENCFF731XBC,remap2022_ENCSR161OBF.Mabi.adult_whole-fly_site-specific-recombination_insertion_FBgn0032493_ENCFF846FAS
ENCSR161YRO.Kah.adult_whole-fly_site-specific-recombination_insertion_FBgn0035144	ENCSR161YRO	Kah	FBgn0035144	adult	whole-fly	NA	whole-fly,site-specific-recombination,insertion	FALSE	FALSE	remap2022_ENCSR161YRO.Kah.adult_whole-fly_site-specific-recombination_insertion_FBgn0035144_ENCFF857RCV,remap2022_ENCSR161YRO.Kah.adult_whole-fly_site-specific-recombination_insertion_FBgn0035144_ENCFF761YBI
ENCSR161YRO.Kah.adult_whole-fly_site-specific-recombination_insertion_FBgn0035144	ENCSR161YRO	Kah	FBgn0035144	adult	whole-fly	NA	whole-fly,site-specific-recombination,insertion	FALSE	FALSE	remap2022_ENCSR161YRO.Kah.adult_whole-fly_site-specific-recombination_insertion_FBgn0035144_ENCFF857RCV,remap2022_ENCSR161YRO.Kah.adult_whole-fly_site-specific-recombination_insertion_FBgn0035144_ENCFF761YBI
ENCSR164WWJ.fd64A.adult_whole-fly_site-specific-recombination_insertion_FBgn0004895	ENCSR164WWJ	fd64A	FBgn0004895	adult	whole-fly	NA	whole-fly,site-specific-recombination,insertion	FALSE	FALSE	remap2022_ENCSR164WWJ.fd64A.adult_whole-fly_site-specific-recombination_insertion_FBgn0004895_ENCFF389EWX,remap2022_ENCSR164WWJ.fd64A.adult_whole-fly_site-specific-recombination_insertion_FBgn0004895_ENCFF519WWO,remap2022_ENCSR164WWJ.fd64A.adult_whole-fly_site-specific-recombination_insertion_FBgn0004895_ENCFF696JDY
ENCSR164WWJ.fd64A.adult_whole-fly_site-specific-recombination_insertion_FBgn0004895	ENCSR164WWJ	fd64A	FBgn0004895	adult	whole-fly	NA	whole-fly,site-specific-recombination,insertion	FALSE	FALSE	remap2022_ENCSR164WWJ.fd64A.adult_whole-fly_site-specific-recombination_insertion_FBgn0004895_ENCFF389EWX,remap2022_ENCSR164WWJ.fd64A.adult_whole-fly_site-specific-recombination_insertion_FBgn0004895_ENCFF519WWO,remap2022_ENCSR164WWJ.fd64A.adult_whole-fly_site-specific-recombination_insertion_FBgn0004895_ENCFF696JDY
ENCSR164WWJ.fd64A.adult_whole-fly_site-specific-recombination_insertion_FBgn0004895	ENCSR164WWJ	fd64A	FBgn0004895	adult	whole-fly	NA	whole-fly,site-specific-recombination,insertion	FALSE	FALSE	remap2022_ENCSR164WWJ.fd64A.adult_whole-fly_site-specific-recombination_insertion_FBgn0004895_ENCFF389EWX,remap2022_ENCSR164WWJ.fd64A.adult_whole-fly_site-specific-recombination_insertion_FBgn0004895_ENCFF519WWO,remap2022_ENCSR164WWJ.fd64A.adult_whole-fly_site-specific-recombination_insertion_FBgn0004895_ENCFF696JDY
ENCSR165KWP.CG17802.adult_whole-fly_site-specific-recombination_insertion_FBgn0038549	ENCSR165KWP	CG17802	FBgn0038549	adult	whole-fly	NA	whole-fly,site-specific-recombination,insertion	FALSE	FALSE	remap2022_ENCSR165KWP.CG17802.adult_whole-fly_site-specific-recombination_insertion_FBgn0038549_ENCFF481QJJ,remap2022_ENCSR165KWP.CG17802.adult_whole-fly_site-specific-recombination_insertion_FBgn0038549_ENCFF015KFQ
ENCSR165KWP.CG17802.adult_whole-fly_site-specific-recombination_insertion_FBgn0038549	ENCSR165KWP	CG17802	FBgn0038549	adult	whole-fly	NA	whole-fly,site-specific-recombination,insertion	FALSE	FALSE	remap2022_ENCSR165KWP.CG17802.adult_whole-fly_site-specific-recombination_insertion_FBgn0038549_ENCFF481QJJ,remap2022_ENCSR165KWP.CG17802.adult_whole-fly_site-specific-recombination_insertion_FBgn0038549_ENCFF015KFQ
ENCSR165OGT.topi.adult_whole-fly_site-specific-recombination_insertion_FBgn0037751	ENCSR165OGT	topi	FBgn0037751	adult	whole-fly	NA	whole-fly,site-specific-recombination,insertion	FALSE	FALSE	remap2022_ENCSR165OGT.topi.adult_whole-fly_site-specific-recombination_insertion_FBgn0037751_ENCFF481LBD,remap2022_ENCSR165OGT.topi.adult_whole-fly_site-specific-recombination_insertion_FBgn0037751_ENCFF760DUT,remap2022_ENCSR165OGT.topi.adult_whole-fly_site-specific-recombination_insertion_FBgn0037751_ENCFF618MPI
ENCSR165OGT.topi.adult_whole-fly_site-specific-recombination_insertion_FBgn0037751	ENCSR165OGT	topi	FBgn0037751	adult	whole-fly	NA	whole-fly,site-specific-recombination,insertion	FALSE	FALSE	remap2022_ENCSR165OGT.topi.adult_whole-fly_site-specific-recombination_insertion_FBgn0037751_ENCFF481LBD,remap2022_ENCSR165OGT.topi.adult_whole-fly_site-specific-recombination_insertion_FBgn0037751_ENCFF760DUT,remap2022_ENCSR165OGT.topi.adult_whole-fly_site-specific-recombination_insertion_FBgn0037751_ENCFF618MPI
ENCSR165OGT.topi.adult_whole-fly_site-specific-recombination_insertion_FBgn0037751	ENCSR165OGT	topi	FBgn0037751	adult	whole-fly	NA	whole-fly,site-specific-recombination,insertion	FALSE	FALSE	remap2022_ENCSR165OGT.topi.adult_whole-fly_site-specific-recombination_insertion_FBgn0037751_ENCFF481LBD,remap2022_ENCSR165OGT.topi.adult_whole-fly_site-specific-recombination_insertion_FBgn0037751_ENCFF760DUT,remap2022_ENCSR165OGT.topi.adult_whole-fly_site-specific-recombination_insertion_FBgn0037751_ENCFF618MPI
ENCSR166XCH.corto.adult_whole-fly_site-specific-recombination_insertion_FBgn0010313	ENCSR166XCH	corto	FBgn0010313	adult	whole-fly	NA	whole-fly,site-specific-recombination,insertion	FALSE	FALSE	remap2022_ENCSR166XCH.corto.adult_whole-fly_site-specific-recombination_insertion_FBgn0010313_ENCFF940QRA,remap2022_ENCSR166XCH.corto.adult_whole-fly_site-specific-recombination_insertion_FBgn0010313_ENCFF190BZP
ENCSR166XCH.corto.adult_whole-fly_site-specific-recombination_insertion_FBgn0010313	ENCSR166XCH	corto	FBgn0010313	adult	whole-fly	NA	whole-fly,site-specific-recombination,insertion	FALSE	FALSE	remap2022_ENCSR166XCH.corto.adult_whole-fly_site-specific-recombination_insertion_FBgn0010313_ENCFF940QRA,remap2022_ENCSR166XCH.corto.adult_whole-fly_site-specific-recombination_insertion_FBgn0010313_ENCFF190BZP
ENCSR167BID.bcd.adult_whole-fly_site-specific-recombination_insertion_FBgn0000166	ENCSR167BID	bcd	FBgn0000166	adult	whole-fly	NA	whole-fly,site-specific-recombination,insertion	FALSE	FALSE	remap2022_ENCSR167BID.bcd.adult_whole-fly_site-specific-recombination_insertion_FBgn0000166_ENCFF784EPP,remap2022_ENCSR167BID.bcd.adult_whole-fly_site-specific-recombination_insertion_FBgn0000166_ENCFF234MSG
ENCSR167BID.bcd.adult_whole-fly_site-specific-recombination_insertion_FBgn0000166	ENCSR167BID	bcd	FBgn0000166	adult	whole-fly	NA	whole-fly,site-specific-recombination,insertion	FALSE	FALSE	remap2022_ENCSR167BID.bcd.adult_whole-fly_site-specific-recombination_insertion_FBgn0000166_ENCFF784EPP,remap2022_ENCSR167BID.bcd.adult_whole-fly_site-specific-recombination_insertion_FBgn0000166_ENCFF234MSG
ENCSR168NHD.CrebA.adult_whole-fly_site-specific-recombination_insertion_FBgn0004396	ENCSR168NHD	CrebA	FBgn0004396	adult	whole-fly	NA	whole-fly,site-specific-recombination,insertion	FALSE	FALSE	remap2022_ENCSR168NHD.CrebA.adult_whole-fly_site-specific-recombination_insertion_FBgn0004396_ENCFF226SKC,remap2022_ENCSR168NHD.CrebA.adult_whole-fly_site-specific-recombination_insertion_FBgn0004396_ENCFF801QCJ
ENCSR168NHD.CrebA.adult_whole-fly_site-specific-recombination_insertion_FBgn0004396	ENCSR168NHD	CrebA	FBgn0004396	adult	whole-fly	NA	whole-fly,site-specific-recombination,insertion	FALSE	FALSE	remap2022_ENCSR168NHD.CrebA.adult_whole-fly_site-specific-recombination_insertion_FBgn0004396_ENCFF226SKC,remap2022_ENCSR168NHD.CrebA.adult_whole-fly_site-specific-recombination_insertion_FBgn0004396_ENCFF801QCJ
ENCSR168XBW.CG2120.adult_whole-fly_site-specific-recombination_insertion_FBgn0030005	ENCSR168XBW	CG2120	FBgn0030005	adult	whole-fly	NA	whole-fly,site-specific-recombination,insertion	FALSE	FALSE	remap2022_ENCSR168XBW.CG2120.adult_whole-fly_site-specific-recombination_insertion_FBgn0030005_ENCFF686QMQ,remap2022_ENCSR168XBW.CG2120.adult_whole-fly_site-specific-recombination_insertion_FBgn0030005_ENCFF048DKG,remap2022_ENCSR168XBW.CG2120.adult_whole-fly_site-specific-recombination_insertion_FBgn0030005_ENCFF599NEX
ENCSR168XBW.CG2120.adult_whole-fly_site-specific-recombination_insertion_FBgn0030005	ENCSR168XBW	CG2120	FBgn0030005	adult	whole-fly	NA	whole-fly,site-specific-recombination,insertion	FALSE	FALSE	remap2022_ENCSR168XBW.CG2120.adult_whole-fly_site-specific-recombination_insertion_FBgn0030005_ENCFF686QMQ,remap2022_ENCSR168XBW.CG2120.adult_whole-fly_site-specific-recombination_insertion_FBgn0030005_ENCFF048DKG,remap2022_ENCSR168XBW.CG2120.adult_whole-fly_site-specific-recombination_insertion_FBgn0030005_ENCFF599NEX
ENCSR168XBW.CG2120.adult_whole-fly_site-specific-recombination_insertion_FBgn0030005	ENCSR168XBW	CG2120	FBgn0030005	adult	whole-fly	NA	whole-fly,site-specific-recombination,insertion	FALSE	FALSE	remap2022_ENCSR168XBW.CG2120.adult_whole-fly_site-specific-recombination_insertion_FBgn0030005_ENCFF686QMQ,remap2022_ENCSR168XBW.CG2120.adult_whole-fly_site-specific-recombination_insertion_FBgn0030005_ENCFF048DKG,remap2022_ENCSR168XBW.CG2120.adult_whole-fly_site-specific-recombination_insertion_FBgn0030005_ENCFF599NEX
ENCSR172KOI.kay.adult_whole-fly_site-specific-recombination_insertion_FBgn0001297	ENCSR172KOI	kay	FBgn0001297	adult	whole-fly	NA	whole-fly,site-specific-recombination,insertion	FALSE	FALSE	remap2022_ENCSR172KOI.kay.adult_whole-fly_site-specific-recombination_insertion_FBgn0001297_ENCFF632QEX,remap2022_ENCSR172KOI.kay.adult_whole-fly_site-specific-recombination_insertion_FBgn0001297_ENCFF224ENT,remap2022_ENCSR172KOI.kay.adult_whole-fly_site-specific-recombination_insertion_FBgn0001297_ENCFF591LGO
ENCSR172KOI.kay.adult_whole-fly_site-specific-recombination_insertion_FBgn0001297	ENCSR172KOI	kay	FBgn0001297	adult	whole-fly	NA	whole-fly,site-specific-recombination,insertion	FALSE	FALSE	remap2022_ENCSR172KOI.kay.adult_whole-fly_site-specific-recombination_insertion_FBgn0001297_ENCFF632QEX,remap2022_ENCSR172KOI.kay.adult_whole-fly_site-specific-recombination_insertion_FBgn0001297_ENCFF224ENT,remap2022_ENCSR172KOI.kay.adult_whole-fly_site-specific-recombination_insertion_FBgn0001297_ENCFF591LGO
ENCSR172KOI.kay.adult_whole-fly_site-specific-recombination_insertion_FBgn0001297	ENCSR172KOI	kay	FBgn0001297	adult	whole-fly	NA	whole-fly,site-specific-recombination,insertion	FALSE	FALSE	remap2022_ENCSR172KOI.kay.adult_whole-fly_site-specific-recombination_insertion_FBgn0001297_ENCFF632QEX,remap2022_ENCSR172KOI.kay.adult_whole-fly_site-specific-recombination_insertion_FBgn0001297_ENCFF224ENT,remap2022_ENCSR172KOI.kay.adult_whole-fly_site-specific-recombination_insertion_FBgn0001297_ENCFF591LGO
ENCSR175KWV.Su-H.adult_whole-fly_FBgn0004837	ENCSR175KWV	Su-H	FBgn0004837	adult	whole-fly	NA	whole-fly	FALSE	FALSE	remap2022_ENCSR175KWV.Su-H.adult_whole-fly_FBgn0004837_ENCFF104CBF,remap2022_ENCSR175KWV.Su-H.adult_whole-fly_FBgn0004837_ENCFF465PUH
ENCSR175KWV.Su-H.adult_whole-fly_FBgn0004837	ENCSR175KWV	Su-H	FBgn0004837	adult	whole-fly	NA	whole-fly	FALSE	FALSE	remap2022_ENCSR175KWV.Su-H.adult_whole-fly_FBgn0004837_ENCFF104CBF,remap2022_ENCSR175KWV.Su-H.adult_whole-fly_FBgn0004837_ENCFF465PUH
ENCSR176PDW.Six4.adult_whole-fly_site-specific-recombination_insertion_FBgn0027364	ENCSR176PDW	Six4	FBgn0027364	adult	whole-fly	NA	whole-fly,site-specific-recombination,insertion	FALSE	FALSE	remap2022_ENCSR176PDW.Six4.adult_whole-fly_site-specific-recombination_insertion_FBgn0027364_ENCFF778GHB,remap2022_ENCSR176PDW.Six4.adult_whole-fly_site-specific-recombination_insertion_FBgn0027364_ENCFF285BDA
ENCSR176PDW.Six4.adult_whole-fly_site-specific-recombination_insertion_FBgn0027364	ENCSR176PDW	Six4	FBgn0027364	adult	whole-fly	NA	whole-fly,site-specific-recombination,insertion	FALSE	FALSE	remap2022_ENCSR176PDW.Six4.adult_whole-fly_site-specific-recombination_insertion_FBgn0027364_ENCFF778GHB,remap2022_ENCSR176PDW.Six4.adult_whole-fly_site-specific-recombination_insertion_FBgn0027364_ENCFF285BDA
ENCSR183WTG.CG2202.adult_whole-fly_site-specific-recombination_insertion_FBgn0030240	ENCSR183WTG	CG2202	FBgn0030240	adult	whole-fly	NA	whole-fly,site-specific-recombination,insertion	FALSE	FALSE	remap2022_ENCSR183WTG.CG2202.adult_whole-fly_site-specific-recombination_insertion_FBgn0030240_ENCFF702UMW,remap2022_ENCSR183WTG.CG2202.adult_whole-fly_site-specific-recombination_insertion_FBgn0030240_ENCFF184UEY
ENCSR183WTG.CG2202.adult_whole-fly_site-specific-recombination_insertion_FBgn0030240	ENCSR183WTG	CG2202	FBgn0030240	adult	whole-fly	NA	whole-fly,site-specific-recombination,insertion	FALSE	FALSE	remap2022_ENCSR183WTG.CG2202.adult_whole-fly_site-specific-recombination_insertion_FBgn0030240_ENCFF702UMW,remap2022_ENCSR183WTG.CG2202.adult_whole-fly_site-specific-recombination_insertion_FBgn0030240_ENCFF184UEY
ENCSR184CKS.Fer1.adult_whole-fly_site-specific-recombination_insertion_FBgn0037475	ENCSR184CKS	Fer1	FBgn0037475	adult	whole-fly	NA	whole-fly,site-specific-recombination,insertion	FALSE	FALSE	remap2022_ENCSR184CKS.Fer1.adult_whole-fly_site-specific-recombination_insertion_FBgn0037475_ENCFF878SNM,remap2022_ENCSR184CKS.Fer1.adult_whole-fly_site-specific-recombination_insertion_FBgn0037475_ENCFF939PFW
ENCSR184CKS.Fer1.adult_whole-fly_site-specific-recombination_insertion_FBgn0037475	ENCSR184CKS	Fer1	FBgn0037475	adult	whole-fly	NA	whole-fly,site-specific-recombination,insertion	FALSE	FALSE	remap2022_ENCSR184CKS.Fer1.adult_whole-fly_site-specific-recombination_insertion_FBgn0037475_ENCFF878SNM,remap2022_ENCSR184CKS.Fer1.adult_whole-fly_site-specific-recombination_insertion_FBgn0037475_ENCFF939PFW
ENCSR186ZKW.CG15696.adult_whole-fly_site-specific-recombination_insertion_FBgn0038833	ENCSR186ZKW	CG15696	FBgn0038833	adult	whole-fly	NA	whole-fly,site-specific-recombination,insertion	FALSE	FALSE	remap2022_ENCSR186ZKW.CG15696.adult_whole-fly_site-specific-recombination_insertion_FBgn0038833_ENCFF286UGN,remap2022_ENCSR186ZKW.CG15696.adult_whole-fly_site-specific-recombination_insertion_FBgn0038833_ENCFF393FTG
ENCSR186ZKW.CG15696.adult_whole-fly_site-specific-recombination_insertion_FBgn0038833	ENCSR186ZKW	CG15696	FBgn0038833	adult	whole-fly	NA	whole-fly,site-specific-recombination,insertion	FALSE	FALSE	remap2022_ENCSR186ZKW.CG15696.adult_whole-fly_site-specific-recombination_insertion_FBgn0038833_ENCFF286UGN,remap2022_ENCSR186ZKW.CG15696.adult_whole-fly_site-specific-recombination_insertion_FBgn0038833_ENCFF393FTG
ENCSR187IVR.CG14711.adult_whole-fly_site-specific-recombination_insertion_FBgn0037922	ENCSR187IVR	CG14711	FBgn0037922	adult	whole-fly	NA	whole-fly,site-specific-recombination,insertion	FALSE	FALSE	remap2022_ENCSR187IVR.CG14711.adult_whole-fly_site-specific-recombination_insertion_FBgn0037922_ENCFF390JKP,remap2022_ENCSR187IVR.CG14711.adult_whole-fly_site-specific-recombination_insertion_FBgn0037922_ENCFF112DAN
ENCSR187IVR.CG14711.adult_whole-fly_site-specific-recombination_insertion_FBgn0037922	ENCSR187IVR	CG14711	FBgn0037922	adult	whole-fly	NA	whole-fly,site-specific-recombination,insertion	FALSE	FALSE	remap2022_ENCSR187IVR.CG14711.adult_whole-fly_site-specific-recombination_insertion_FBgn0037922_ENCFF390JKP,remap2022_ENCSR187IVR.CG14711.adult_whole-fly_site-specific-recombination_insertion_FBgn0037922_ENCFF112DAN
ENCSR189NRY.Hsf.adult_whole-fly_site-specific-recombination_insertion_FBgn0001222	ENCSR189NRY	Hsf	FBgn0001222	adult	whole-fly	NA	whole-fly,site-specific-recombination,insertion	FALSE	FALSE	remap2022_ENCSR189NRY.Hsf.adult_whole-fly_site-specific-recombination_insertion_FBgn0001222_ENCFF028WFG,remap2022_ENCSR189NRY.Hsf.adult_whole-fly_site-specific-recombination_insertion_FBgn0001222_ENCFF350BPO,remap2022_ENCSR189NRY.Hsf.adult_whole-fly_site-specific-recombination_insertion_FBgn0001222_ENCFF715GDY
ENCSR189NRY.Hsf.adult_whole-fly_site-specific-recombination_insertion_FBgn0001222	ENCSR189NRY	Hsf	FBgn0001222	adult	whole-fly	NA	whole-fly,site-specific-recombination,insertion	FALSE	FALSE	remap2022_ENCSR189NRY.Hsf.adult_whole-fly_site-specific-recombination_insertion_FBgn0001222_ENCFF028WFG,remap2022_ENCSR189NRY.Hsf.adult_whole-fly_site-specific-recombination_insertion_FBgn0001222_ENCFF350BPO,remap2022_ENCSR189NRY.Hsf.adult_whole-fly_site-specific-recombination_insertion_FBgn0001222_ENCFF715GDY
ENCSR189NRY.Hsf.adult_whole-fly_site-specific-recombination_insertion_FBgn0001222	ENCSR189NRY	Hsf	FBgn0001222	adult	whole-fly	NA	whole-fly,site-specific-recombination,insertion	FALSE	FALSE	remap2022_ENCSR189NRY.Hsf.adult_whole-fly_site-specific-recombination_insertion_FBgn0001222_ENCFF028WFG,remap2022_ENCSR189NRY.Hsf.adult_whole-fly_site-specific-recombination_insertion_FBgn0001222_ENCFF350BPO,remap2022_ENCSR189NRY.Hsf.adult_whole-fly_site-specific-recombination_insertion_FBgn0001222_ENCFF715GDY
ENCSR190CJZ.CG9609.adult_whole-fly_site-specific-recombination_insertion_FBgn0030787	ENCSR190CJZ	CG9609	FBgn0030787	adult	whole-fly	NA	whole-fly,site-specific-recombination,insertion	FALSE	FALSE	remap2022_ENCSR190CJZ.CG9609.adult_whole-fly_site-specific-recombination_insertion_FBgn0030787_ENCFF747AZV,remap2022_ENCSR190CJZ.CG9609.adult_whole-fly_site-specific-recombination_insertion_FBgn0030787_ENCFF508WWF,remap2022_ENCSR190CJZ.CG9609.adult_whole-fly_site-specific-recombination_insertion_FBgn0030787_ENCFF063EYT
ENCSR190CJZ.CG9609.adult_whole-fly_site-specific-recombination_insertion_FBgn0030787	ENCSR190CJZ	CG9609	FBgn0030787	adult	whole-fly	NA	whole-fly,site-specific-recombination,insertion	FALSE	FALSE	remap2022_ENCSR190CJZ.CG9609.adult_whole-fly_site-specific-recombination_insertion_FBgn0030787_ENCFF747AZV,remap2022_ENCSR190CJZ.CG9609.adult_whole-fly_site-specific-recombination_insertion_FBgn0030787_ENCFF508WWF,remap2022_ENCSR190CJZ.CG9609.adult_whole-fly_site-specific-recombination_insertion_FBgn0030787_ENCFF063EYT
ENCSR190CJZ.CG9609.adult_whole-fly_site-specific-recombination_insertion_FBgn0030787	ENCSR190CJZ	CG9609	FBgn0030787	adult	whole-fly	NA	whole-fly,site-specific-recombination,insertion	FALSE	FALSE	remap2022_ENCSR190CJZ.CG9609.adult_whole-fly_site-specific-recombination_insertion_FBgn0030787_ENCFF747AZV,remap2022_ENCSR190CJZ.CG9609.adult_whole-fly_site-specific-recombination_insertion_FBgn0030787_ENCFF508WWF,remap2022_ENCSR190CJZ.CG9609.adult_whole-fly_site-specific-recombination_insertion_FBgn0030787_ENCFF063EYT
ENCSR191VCQ.Myc.adult_whole-fly_FBgn0262656	ENCSR191VCQ	Myc	FBgn0262656	adult	whole-fly	NA	whole-fly	FALSE	FALSE	remap2022_ENCSR191VCQ.Myc.adult_whole-fly_FBgn0262656_ENCFF896DWM,remap2022_ENCSR191VCQ.Myc.adult_whole-fly_FBgn0262656_ENCFF792GXW
ENCSR191VCQ.Myc.adult_whole-fly_FBgn0262656	ENCSR191VCQ	Myc	FBgn0262656	adult	whole-fly	NA	whole-fly	FALSE	FALSE	remap2022_ENCSR191VCQ.Myc.adult_whole-fly_FBgn0262656_ENCFF896DWM,remap2022_ENCSR191VCQ.Myc.adult_whole-fly_FBgn0262656_ENCFF792GXW
ENCSR194LIS.CG18476.adult_whole-fly_site-specific-recombination_insertion_FBgn0037931	ENCSR194LIS	CG18476	FBgn0037931	adult	whole-fly	NA	whole-fly,site-specific-recombination,insertion	FALSE	FALSE	remap2022_ENCSR194LIS.CG18476.adult_whole-fly_site-specific-recombination_insertion_FBgn0037931_ENCFF262CGD,remap2022_ENCSR194LIS.CG18476.adult_whole-fly_site-specific-recombination_insertion_FBgn0037931_ENCFF309JPP
ENCSR194LIS.CG18476.adult_whole-fly_site-specific-recombination_insertion_FBgn0037931	ENCSR194LIS	CG18476	FBgn0037931	adult	whole-fly	NA	whole-fly,site-specific-recombination,insertion	FALSE	FALSE	remap2022_ENCSR194LIS.CG18476.adult_whole-fly_site-specific-recombination_insertion_FBgn0037931_ENCFF262CGD,remap2022_ENCSR194LIS.CG18476.adult_whole-fly_site-specific-recombination_insertion_FBgn0037931_ENCFF309JPP
ENCSR196VPW.Hr4.adult_whole-fly_site-specific-recombination_insertion_FBgn0264562	ENCSR196VPW	Hr4	FBgn0264562	adult	whole-fly	NA	whole-fly,site-specific-recombination,insertion	FALSE	FALSE	remap2022_ENCSR196VPW.Hr4.adult_whole-fly_site-specific-recombination_insertion_FBgn0264562_ENCFF408BBT,remap2022_ENCSR196VPW.Hr4.adult_whole-fly_site-specific-recombination_insertion_FBgn0264562_ENCFF133VKR,remap2022_ENCSR196VPW.Hr4.adult_whole-fly_site-specific-recombination_insertion_FBgn0264562_ENCFF097VZJ
ENCSR196VPW.Hr4.adult_whole-fly_site-specific-recombination_insertion_FBgn0264562	ENCSR196VPW	Hr4	FBgn0264562	adult	whole-fly	NA	whole-fly,site-specific-recombination,insertion	FALSE	FALSE	remap2022_ENCSR196VPW.Hr4.adult_whole-fly_site-specific-recombination_insertion_FBgn0264562_ENCFF408BBT,remap2022_ENCSR196VPW.Hr4.adult_whole-fly_site-specific-recombination_insertion_FBgn0264562_ENCFF133VKR,remap2022_ENCSR196VPW.Hr4.adult_whole-fly_site-specific-recombination_insertion_FBgn0264562_ENCFF097VZJ
ENCSR196VPW.Hr4.adult_whole-fly_site-specific-recombination_insertion_FBgn0264562	ENCSR196VPW	Hr4	FBgn0264562	adult	whole-fly	NA	whole-fly,site-specific-recombination,insertion	FALSE	FALSE	remap2022_ENCSR196VPW.Hr4.adult_whole-fly_site-specific-recombination_insertion_FBgn0264562_ENCFF408BBT,remap2022_ENCSR196VPW.Hr4.adult_whole-fly_site-specific-recombination_insertion_FBgn0264562_ENCFF133VKR,remap2022_ENCSR196VPW.Hr4.adult_whole-fly_site-specific-recombination_insertion_FBgn0264562_ENCFF097VZJ
ENCSR199FME.grau.adult_whole-fly_site-specific-recombination_insertion_FBgn0001133	ENCSR199FME	grau	FBgn0001133	adult	whole-fly	NA	whole-fly,site-specific-recombination,insertion	FALSE	FALSE	remap2022_ENCSR199FME.grau.adult_whole-fly_site-specific-recombination_insertion_FBgn0001133_ENCFF476UXZ,remap2022_ENCSR199FME.grau.adult_whole-fly_site-specific-recombination_insertion_FBgn0001133_ENCFF544OVX,remap2022_ENCSR199FME.grau.adult_whole-fly_site-specific-recombination_insertion_FBgn0001133_ENCFF605TKS
ENCSR199FME.grau.adult_whole-fly_site-specific-recombination_insertion_FBgn0001133	ENCSR199FME	grau	FBgn0001133	adult	whole-fly	NA	whole-fly,site-specific-recombination,insertion	FALSE	FALSE	remap2022_ENCSR199FME.grau.adult_whole-fly_site-specific-recombination_insertion_FBgn0001133_ENCFF476UXZ,remap2022_ENCSR199FME.grau.adult_whole-fly_site-specific-recombination_insertion_FBgn0001133_ENCFF544OVX,remap2022_ENCSR199FME.grau.adult_whole-fly_site-specific-recombination_insertion_FBgn0001133_ENCFF605TKS
ENCSR199FME.grau.adult_whole-fly_site-specific-recombination_insertion_FBgn0001133	ENCSR199FME	grau	FBgn0001133	adult	whole-fly	NA	whole-fly,site-specific-recombination,insertion	FALSE	FALSE	remap2022_ENCSR199FME.grau.adult_whole-fly_site-specific-recombination_insertion_FBgn0001133_ENCFF476UXZ,remap2022_ENCSR199FME.grau.adult_whole-fly_site-specific-recombination_insertion_FBgn0001133_ENCFF544OVX,remap2022_ENCSR199FME.grau.adult_whole-fly_site-specific-recombination_insertion_FBgn0001133_ENCFF605TKS
ENCSR199TFG.tj.adult_whole-fly_site-specific-recombination_insertion_FBgn0000964	ENCSR199TFG	tj	FBgn0000964	adult	whole-fly	NA	whole-fly,site-specific-recombination,insertion	FALSE	FALSE	remap2022_ENCSR199TFG.tj.adult_whole-fly_site-specific-recombination_insertion_FBgn0000964_ENCFF115VDS,remap2022_ENCSR199TFG.tj.adult_whole-fly_site-specific-recombination_insertion_FBgn0000964_ENCFF619ZJL,remap2022_ENCSR199TFG.tj.adult_whole-fly_site-specific-recombination_insertion_FBgn0000964_ENCFF844OZJ
ENCSR199TFG.tj.adult_whole-fly_site-specific-recombination_insertion_FBgn0000964	ENCSR199TFG	tj	FBgn0000964	adult	whole-fly	NA	whole-fly,site-specific-recombination,insertion	FALSE	FALSE	remap2022_ENCSR199TFG.tj.adult_whole-fly_site-specific-recombination_insertion_FBgn0000964_ENCFF115VDS,remap2022_ENCSR199TFG.tj.adult_whole-fly_site-specific-recombination_insertion_FBgn0000964_ENCFF619ZJL,remap2022_ENCSR199TFG.tj.adult_whole-fly_site-specific-recombination_insertion_FBgn0000964_ENCFF844OZJ
ENCSR199TFG.tj.adult_whole-fly_site-specific-recombination_insertion_FBgn0000964	ENCSR199TFG	tj	FBgn0000964	adult	whole-fly	NA	whole-fly,site-specific-recombination,insertion	FALSE	FALSE	remap2022_ENCSR199TFG.tj.adult_whole-fly_site-specific-recombination_insertion_FBgn0000964_ENCFF115VDS,remap2022_ENCSR199TFG.tj.adult_whole-fly_site-specific-recombination_insertion_FBgn0000964_ENCFF619ZJL,remap2022_ENCSR199TFG.tj.adult_whole-fly_site-specific-recombination_insertion_FBgn0000964_ENCFF844OZJ
ENCSR200GOV.brk.adult_whole-fly_site-specific-recombination_insertion_FBgn0024250	ENCSR200GOV	brk	FBgn0024250	adult	whole-fly	NA	whole-fly,site-specific-recombination,insertion	FALSE	FALSE	remap2022_ENCSR200GOV.brk.adult_whole-fly_site-specific-recombination_insertion_FBgn0024250_ENCFF986OZV,remap2022_ENCSR200GOV.brk.adult_whole-fly_site-specific-recombination_insertion_FBgn0024250_ENCFF084REW
ENCSR200GOV.brk.adult_whole-fly_site-specific-recombination_insertion_FBgn0024250	ENCSR200GOV	brk	FBgn0024250	adult	whole-fly	NA	whole-fly,site-specific-recombination,insertion	FALSE	FALSE	remap2022_ENCSR200GOV.brk.adult_whole-fly_site-specific-recombination_insertion_FBgn0024250_ENCFF986OZV,remap2022_ENCSR200GOV.brk.adult_whole-fly_site-specific-recombination_insertion_FBgn0024250_ENCFF084REW
ENCSR202QJA.Sox15.adult_whole-fly_site-specific-recombination_insertion_FBgn0005613	ENCSR202QJA	Sox15	FBgn0005613	adult	whole-fly	NA	whole-fly,site-specific-recombination,insertion	FALSE	FALSE	remap2022_ENCSR202QJA.Sox15.adult_whole-fly_site-specific-recombination_insertion_FBgn0005613_ENCFF488KXS,remap2022_ENCSR202QJA.Sox15.adult_whole-fly_site-specific-recombination_insertion_FBgn0005613_ENCFF895UGG,remap2022_ENCSR202QJA.Sox15.adult_whole-fly_site-specific-recombination_insertion_FBgn0005613_ENCFF141ZJE,remap2022_ENCSR202QJA.Sox15.adult_whole-fly_site-specific-recombination_insertion…
ENCSR202QJA.Sox15.adult_whole-fly_site-specific-recombination_insertion_FBgn0005613	ENCSR202QJA	Sox15	FBgn0005613	adult	whole-fly	NA	whole-fly,site-specific-recombination,insertion	FALSE	FALSE	remap2022_ENCSR202QJA.Sox15.adult_whole-fly_site-specific-recombination_insertion_FBgn0005613_ENCFF488KXS,remap2022_ENCSR202QJA.Sox15.adult_whole-fly_site-specific-recombination_insertion_FBgn0005613_ENCFF895UGG,remap2022_ENCSR202QJA.Sox15.adult_whole-fly_site-specific-recombination_insertion_FBgn0005613_ENCFF141ZJE,remap2022_ENCSR202QJA.Sox15.adult_whole-fly_site-specific-recombination_insertion…
ENCSR202QJA.Sox15.adult_whole-fly_site-specific-recombination_insertion_FBgn0005613	ENCSR202QJA	Sox15	FBgn0005613	adult	whole-fly	NA	whole-fly,site-specific-recombination,insertion	FALSE	FALSE	remap2022_ENCSR202QJA.Sox15.adult_whole-fly_site-specific-recombination_insertion_FBgn0005613_ENCFF488KXS,remap2022_ENCSR202QJA.Sox15.adult_whole-fly_site-specific-recombination_insertion_FBgn0005613_ENCFF895UGG,remap2022_ENCSR202QJA.Sox15.adult_whole-fly_site-specific-recombination_insertion_FBgn0005613_ENCFF141ZJE,remap2022_ENCSR202QJA.Sox15.adult_whole-fly_site-specific-recombination_insertion…
ENCSR202QJA.Sox15.adult_whole-fly_site-specific-recombination_insertion_FBgn0005613	ENCSR202QJA	Sox15	FBgn0005613	adult	whole-fly	NA	whole-fly,site-specific-recombination,insertion	FALSE	FALSE	remap2022_ENCSR202QJA.Sox15.adult_whole-fly_site-specific-recombination_insertion_FBgn0005613_ENCFF488KXS,remap2022_ENCSR202QJA.Sox15.adult_whole-fly_site-specific-recombination_insertion_FBgn0005613_ENCFF895UGG,remap2022_ENCSR202QJA.Sox15.adult_whole-fly_site-specific-recombination_insertion_FBgn0005613_ENCFF141ZJE,remap2022_ENCSR202QJA.Sox15.adult_whole-fly_site-specific-recombination_insertion…
ENCSR202QJA.Sox15.adult_whole-fly_site-specific-recombination_insertion_FBgn0005613	ENCSR202QJA	Sox15	FBgn0005613	adult	whole-fly	NA	whole-fly,site-specific-recombination,insertion	FALSE	FALSE	remap2022_ENCSR202QJA.Sox15.adult_whole-fly_site-specific-recombination_insertion_FBgn0005613_ENCFF488KXS,remap2022_ENCSR202QJA.Sox15.adult_whole-fly_site-specific-recombination_insertion_FBgn0005613_ENCFF895UGG,remap2022_ENCSR202QJA.Sox15.adult_whole-fly_site-specific-recombination_insertion_FBgn0005613_ENCFF141ZJE,remap2022_ENCSR202QJA.Sox15.adult_whole-fly_site-specific-recombination_insertion…
ENCSR214LWK.CG33557.adult_whole-fly_site-specific-recombination_insertion_FBgn0053557	ENCSR214LWK	CG33557	FBgn0053557	adult	whole-fly	NA	whole-fly,site-specific-recombination,insertion	FALSE	FALSE	remap2022_ENCSR214LWK.CG33557.adult_whole-fly_site-specific-recombination_insertion_FBgn0053557_ENCFF076EQV,remap2022_ENCSR214LWK.CG33557.adult_whole-fly_site-specific-recombination_insertion_FBgn0053557_ENCFF738IVZ
ENCSR214LWK.CG33557.adult_whole-fly_site-specific-recombination_insertion_FBgn0053557	ENCSR214LWK	CG33557	FBgn0053557	adult	whole-fly	NA	whole-fly,site-specific-recombination,insertion	FALSE	FALSE	remap2022_ENCSR214LWK.CG33557.adult_whole-fly_site-specific-recombination_insertion_FBgn0053557_ENCFF076EQV,remap2022_ENCSR214LWK.CG33557.adult_whole-fly_site-specific-recombination_insertion_FBgn0053557_ENCFF738IVZ
ENCSR216AQL.zld.adult_whole-fly_site-specific-recombination_insertion_FBgn0259789	ENCSR216AQL	zld	FBgn0259789	adult	whole-fly	NA	whole-fly,site-specific-recombination,insertion	FALSE	FALSE	remap2022_ENCSR216AQL.zld.adult_whole-fly_site-specific-recombination_insertion_FBgn0259789_ENCFF026LBK,remap2022_ENCSR216AQL.zld.adult_whole-fly_site-specific-recombination_insertion_FBgn0259789_ENCFF592VYQ
ENCSR216AQL.zld.adult_whole-fly_site-specific-recombination_insertion_FBgn0259789	ENCSR216AQL	zld	FBgn0259789	adult	whole-fly	NA	whole-fly,site-specific-recombination,insertion	FALSE	FALSE	remap2022_ENCSR216AQL.zld.adult_whole-fly_site-specific-recombination_insertion_FBgn0259789_ENCFF026LBK,remap2022_ENCSR216AQL.zld.adult_whole-fly_site-specific-recombination_insertion_FBgn0259789_ENCFF592VYQ
ENCSR219AHM.Rabex-5.adult_whole-fly_site-specific-recombination_insertion_FBgn0262937	ENCSR219AHM	Rabex-5	FBgn0262937	adult	whole-fly	NA	whole-fly,site-specific-recombination,insertion	FALSE	FALSE	remap2022_ENCSR219AHM.Rabex-5.adult_whole-fly_site-specific-recombination_insertion_FBgn0262937_ENCFF762WCY,remap2022_ENCSR219AHM.Rabex-5.adult_whole-fly_site-specific-recombination_insertion_FBgn0262937_ENCFF664IGH,remap2022_ENCSR219AHM.Rabex-5.adult_whole-fly_site-specific-recombination_insertion_FBgn0262937_ENCFF957KWU
ENCSR219AHM.Rabex-5.adult_whole-fly_site-specific-recombination_insertion_FBgn0262937	ENCSR219AHM	Rabex-5	FBgn0262937	adult	whole-fly	NA	whole-fly,site-specific-recombination,insertion	FALSE	FALSE	remap2022_ENCSR219AHM.Rabex-5.adult_whole-fly_site-specific-recombination_insertion_FBgn0262937_ENCFF762WCY,remap2022_ENCSR219AHM.Rabex-5.adult_whole-fly_site-specific-recombination_insertion_FBgn0262937_ENCFF664IGH,remap2022_ENCSR219AHM.Rabex-5.adult_whole-fly_site-specific-recombination_insertion_FBgn0262937_ENCFF957KWU
ENCSR219AHM.Rabex-5.adult_whole-fly_site-specific-recombination_insertion_FBgn0262937	ENCSR219AHM	Rabex-5	FBgn0262937	adult	whole-fly	NA	whole-fly,site-specific-recombination,insertion	FALSE	FALSE	remap2022_ENCSR219AHM.Rabex-5.adult_whole-fly_site-specific-recombination_insertion_FBgn0262937_ENCFF762WCY,remap2022_ENCSR219AHM.Rabex-5.adult_whole-fly_site-specific-recombination_insertion_FBgn0262937_ENCFF664IGH,remap2022_ENCSR219AHM.Rabex-5.adult_whole-fly_site-specific-recombination_insertion_FBgn0262937_ENCFF957KWU
ENCSR220HPB.tll.adult_whole-fly_site-specific-recombination_insertion_FBgn0003720	ENCSR220HPB	tll	FBgn0003720	adult	whole-fly	NA	whole-fly,site-specific-recombination,insertion	FALSE	FALSE	remap2022_ENCSR220HPB.tll.adult_whole-fly_site-specific-recombination_insertion_FBgn0003720_ENCFF891HKC,remap2022_ENCSR220HPB.tll.adult_whole-fly_site-specific-recombination_insertion_FBgn0003720_ENCFF956URF
ENCSR220HPB.tll.adult_whole-fly_site-specific-recombination_insertion_FBgn0003720	ENCSR220HPB	tll	FBgn0003720	adult	whole-fly	NA	whole-fly,site-specific-recombination,insertion	FALSE	FALSE	remap2022_ENCSR220HPB.tll.adult_whole-fly_site-specific-recombination_insertion_FBgn0003720_ENCFF891HKC,remap2022_ENCSR220HPB.tll.adult_whole-fly_site-specific-recombination_insertion_FBgn0003720_ENCFF956URF
ENCSR224OFQ.vri.adult_whole-fly_site-specific-recombination_insertion_FBgn0016076	ENCSR224OFQ	vri	FBgn0016076	adult	whole-fly	NA	whole-fly,site-specific-recombination,insertion	FALSE	FALSE	remap2022_ENCSR224OFQ.vri.adult_whole-fly_site-specific-recombination_insertion_FBgn0016076_ENCFF932LVY,remap2022_ENCSR224OFQ.vri.adult_whole-fly_site-specific-recombination_insertion_FBgn0016076_ENCFF762OOF,remap2022_ENCSR224OFQ.vri.adult_whole-fly_site-specific-recombination_insertion_FBgn0016076_ENCFF381SWW
ENCSR224OFQ.vri.adult_whole-fly_site-specific-recombination_insertion_FBgn0016076	ENCSR224OFQ	vri	FBgn0016076	adult	whole-fly	NA	whole-fly,site-specific-recombination,insertion	FALSE	FALSE	remap2022_ENCSR224OFQ.vri.adult_whole-fly_site-specific-recombination_insertion_FBgn0016076_ENCFF932LVY,remap2022_ENCSR224OFQ.vri.adult_whole-fly_site-specific-recombination_insertion_FBgn0016076_ENCFF762OOF,remap2022_ENCSR224OFQ.vri.adult_whole-fly_site-specific-recombination_insertion_FBgn0016076_ENCFF381SWW
ENCSR224OFQ.vri.adult_whole-fly_site-specific-recombination_insertion_FBgn0016076	ENCSR224OFQ	vri	FBgn0016076	adult	whole-fly	NA	whole-fly,site-specific-recombination,insertion	FALSE	FALSE	remap2022_ENCSR224OFQ.vri.adult_whole-fly_site-specific-recombination_insertion_FBgn0016076_ENCFF932LVY,remap2022_ENCSR224OFQ.vri.adult_whole-fly_site-specific-recombination_insertion_FBgn0016076_ENCFF762OOF,remap2022_ENCSR224OFQ.vri.adult_whole-fly_site-specific-recombination_insertion_FBgn0016076_ENCFF381SWW
ENCSR224YOT.bigmax.adult_whole-fly_site-specific-recombination_insertion_FBgn0039509	ENCSR224YOT	bigmax	FBgn0039509	adult	whole-fly	NA	whole-fly,site-specific-recombination,insertion	FALSE	FALSE	remap2022_ENCSR224YOT.bigmax.adult_whole-fly_site-specific-recombination_insertion_FBgn0039509_ENCFF689WXQ,remap2022_ENCSR224YOT.bigmax.adult_whole-fly_site-specific-recombination_insertion_FBgn0039509_ENCFF762APG
ENCSR224YOT.bigmax.adult_whole-fly_site-specific-recombination_insertion_FBgn0039509	ENCSR224YOT	bigmax	FBgn0039509	adult	whole-fly	NA	whole-fly,site-specific-recombination,insertion	FALSE	FALSE	remap2022_ENCSR224YOT.bigmax.adult_whole-fly_site-specific-recombination_insertion_FBgn0039509_ENCFF689WXQ,remap2022_ENCSR224YOT.bigmax.adult_whole-fly_site-specific-recombination_insertion_FBgn0039509_ENCFF762APG
ENCSR226MOG.CG10565.adult_whole-fly_site-specific-recombination_insertion_FBgn0037051	ENCSR226MOG	CG10565	FBgn0037051	adult	whole-fly	NA	whole-fly,site-specific-recombination,insertion	FALSE	FALSE	remap2022_ENCSR226MOG.CG10565.adult_whole-fly_site-specific-recombination_insertion_FBgn0037051_ENCFF682MXB,remap2022_ENCSR226MOG.CG10565.adult_whole-fly_site-specific-recombination_insertion_FBgn0037051_ENCFF726YGU,remap2022_ENCSR226MOG.CG10565.adult_whole-fly_site-specific-recombination_insertion_FBgn0037051_ENCFF268VTH
ENCSR226MOG.CG10565.adult_whole-fly_site-specific-recombination_insertion_FBgn0037051	ENCSR226MOG	CG10565	FBgn0037051	adult	whole-fly	NA	whole-fly,site-specific-recombination,insertion	FALSE	FALSE	remap2022_ENCSR226MOG.CG10565.adult_whole-fly_site-specific-recombination_insertion_FBgn0037051_ENCFF682MXB,remap2022_ENCSR226MOG.CG10565.adult_whole-fly_site-specific-recombination_insertion_FBgn0037051_ENCFF726YGU,remap2022_ENCSR226MOG.CG10565.adult_whole-fly_site-specific-recombination_insertion_FBgn0037051_ENCFF268VTH
ENCSR226MOG.CG10565.adult_whole-fly_site-specific-recombination_insertion_FBgn0037051	ENCSR226MOG	CG10565	FBgn0037051	adult	whole-fly	NA	whole-fly,site-specific-recombination,insertion	FALSE	FALSE	remap2022_ENCSR226MOG.CG10565.adult_whole-fly_site-specific-recombination_insertion_FBgn0037051_ENCFF682MXB,remap2022_ENCSR226MOG.CG10565.adult_whole-fly_site-specific-recombination_insertion_FBgn0037051_ENCFF726YGU,remap2022_ENCSR226MOG.CG10565.adult_whole-fly_site-specific-recombination_insertion_FBgn0037051_ENCFF268VTH
ENCSR227BSJ.CG11504.adult_whole-fly_site-specific-recombination_insertion_FBgn0039733	ENCSR227BSJ	CG11504	FBgn0039733	adult	whole-fly	NA	whole-fly,site-specific-recombination,insertion	FALSE	FALSE	remap2022_ENCSR227BSJ.CG11504.adult_whole-fly_site-specific-recombination_insertion_FBgn0039733_ENCFF287LRL,remap2022_ENCSR227BSJ.CG11504.adult_whole-fly_site-specific-recombination_insertion_FBgn0039733_ENCFF895KIP,remap2022_ENCSR227BSJ.CG11504.adult_whole-fly_site-specific-recombination_insertion_FBgn0039733_ENCFF915FCT
ENCSR227BSJ.CG11504.adult_whole-fly_site-specific-recombination_insertion_FBgn0039733	ENCSR227BSJ	CG11504	FBgn0039733	adult	whole-fly	NA	whole-fly,site-specific-recombination,insertion	FALSE	FALSE	remap2022_ENCSR227BSJ.CG11504.adult_whole-fly_site-specific-recombination_insertion_FBgn0039733_ENCFF287LRL,remap2022_ENCSR227BSJ.CG11504.adult_whole-fly_site-specific-recombination_insertion_FBgn0039733_ENCFF895KIP,remap2022_ENCSR227BSJ.CG11504.adult_whole-fly_site-specific-recombination_insertion_FBgn0039733_ENCFF915FCT
ENCSR227BSJ.CG11504.adult_whole-fly_site-specific-recombination_insertion_FBgn0039733	ENCSR227BSJ	CG11504	FBgn0039733	adult	whole-fly	NA	whole-fly,site-specific-recombination,insertion	FALSE	FALSE	remap2022_ENCSR227BSJ.CG11504.adult_whole-fly_site-specific-recombination_insertion_FBgn0039733_ENCFF287LRL,remap2022_ENCSR227BSJ.CG11504.adult_whole-fly_site-specific-recombination_insertion_FBgn0039733_ENCFF895KIP,remap2022_ENCSR227BSJ.CG11504.adult_whole-fly_site-specific-recombination_insertion_FBgn0039733_ENCFF915FCT
ENCSR229DNL.dsf.adult_whole-fly_site-specific-recombination_insertion_FBgn0015381	ENCSR229DNL	dsf	FBgn0015381	adult	whole-fly	NA	whole-fly,site-specific-recombination,insertion	FALSE	FALSE	remap2022_ENCSR229DNL.dsf.adult_whole-fly_site-specific-recombination_insertion_FBgn0015381_ENCFF443WCR,remap2022_ENCSR229DNL.dsf.adult_whole-fly_site-specific-recombination_insertion_FBgn0015381_ENCFF550YAH
ENCSR229DNL.dsf.adult_whole-fly_site-specific-recombination_insertion_FBgn0015381	ENCSR229DNL	dsf	FBgn0015381	adult	whole-fly	NA	whole-fly,site-specific-recombination,insertion	FALSE	FALSE	remap2022_ENCSR229DNL.dsf.adult_whole-fly_site-specific-recombination_insertion_FBgn0015381_ENCFF443WCR,remap2022_ENCSR229DNL.dsf.adult_whole-fly_site-specific-recombination_insertion_FBgn0015381_ENCFF550YAH
ENCSR229FYE.Hr78.adult_whole-fly_insertion_FBgn0015239	ENCSR229FYE	Hr78	FBgn0015239	adult	whole-fly	NA	whole-fly,insertion	FALSE	FALSE	remap2022_ENCSR229FYE.Hr78.adult_whole-fly_insertion_FBgn0015239_ENCFF630LRQ,remap2022_ENCSR229FYE.Hr78.adult_whole-fly_insertion_FBgn0015239_ENCFF417AWU
ENCSR229FYE.Hr78.adult_whole-fly_insertion_FBgn0015239	ENCSR229FYE	Hr78	FBgn0015239	adult	whole-fly	NA	whole-fly,insertion	FALSE	FALSE	remap2022_ENCSR229FYE.Hr78.adult_whole-fly_insertion_FBgn0015239_ENCFF630LRQ,remap2022_ENCSR229FYE.Hr78.adult_whole-fly_insertion_FBgn0015239_ENCFF417AWU
ENCSR233UXG.CG6254.adult_whole-fly_site-specific-recombination_insertion_FBgn0037794	ENCSR233UXG	CG6254	FBgn0037794	adult	whole-fly	NA	whole-fly,site-specific-recombination,insertion	FALSE	FALSE	remap2022_ENCSR233UXG.CG6254.adult_whole-fly_site-specific-recombination_insertion_FBgn0037794_ENCFF774HNQ,remap2022_ENCSR233UXG.CG6254.adult_whole-fly_site-specific-recombination_insertion_FBgn0037794_ENCFF729SIV,remap2022_ENCSR233UXG.CG6254.adult_whole-fly_site-specific-recombination_insertion_FBgn0037794_ENCFF122EXG
ENCSR233UXG.CG6254.adult_whole-fly_site-specific-recombination_insertion_FBgn0037794	ENCSR233UXG	CG6254	FBgn0037794	adult	whole-fly	NA	whole-fly,site-specific-recombination,insertion	FALSE	FALSE	remap2022_ENCSR233UXG.CG6254.adult_whole-fly_site-specific-recombination_insertion_FBgn0037794_ENCFF774HNQ,remap2022_ENCSR233UXG.CG6254.adult_whole-fly_site-specific-recombination_insertion_FBgn0037794_ENCFF729SIV,remap2022_ENCSR233UXG.CG6254.adult_whole-fly_site-specific-recombination_insertion_FBgn0037794_ENCFF122EXG
ENCSR233UXG.CG6254.adult_whole-fly_site-specific-recombination_insertion_FBgn0037794	ENCSR233UXG	CG6254	FBgn0037794	adult	whole-fly	NA	whole-fly,site-specific-recombination,insertion	FALSE	FALSE	remap2022_ENCSR233UXG.CG6254.adult_whole-fly_site-specific-recombination_insertion_FBgn0037794_ENCFF774HNQ,remap2022_ENCSR233UXG.CG6254.adult_whole-fly_site-specific-recombination_insertion_FBgn0037794_ENCFF729SIV,remap2022_ENCSR233UXG.CG6254.adult_whole-fly_site-specific-recombination_insertion_FBgn0037794_ENCFF122EXG
ENCSR235MSK.eve.adult_whole-fly_site-specific-recombination_insertion_FBgn0000606	ENCSR235MSK	eve	FBgn0000606	adult	whole-fly	NA	whole-fly,site-specific-recombination,insertion	FALSE	FALSE	remap2022_ENCSR235MSK.eve.adult_whole-fly_site-specific-recombination_insertion_FBgn0000606_ENCFF435MCQ,remap2022_ENCSR235MSK.eve.adult_whole-fly_site-specific-recombination_insertion_FBgn0000606_ENCFF348DFR
ENCSR235MSK.eve.adult_whole-fly_site-specific-recombination_insertion_FBgn0000606	ENCSR235MSK	eve	FBgn0000606	adult	whole-fly	NA	whole-fly,site-specific-recombination,insertion	FALSE	FALSE	remap2022_ENCSR235MSK.eve.adult_whole-fly_site-specific-recombination_insertion_FBgn0000606_ENCFF435MCQ,remap2022_ENCSR235MSK.eve.adult_whole-fly_site-specific-recombination_insertion_FBgn0000606_ENCFF348DFR
ENCSR237AMN.CG14655.adult_whole-fly_site-specific-recombination_insertion_FBgn0037275	ENCSR237AMN	CG14655	FBgn0037275	adult	whole-fly	NA	whole-fly,site-specific-recombination,insertion	FALSE	FALSE	remap2022_ENCSR237AMN.CG14655.adult_whole-fly_site-specific-recombination_insertion_FBgn0037275_ENCFF789BFM,remap2022_ENCSR237AMN.CG14655.adult_whole-fly_site-specific-recombination_insertion_FBgn0037275_ENCFF999DGP,remap2022_ENCSR237AMN.CG14655.adult_whole-fly_site-specific-recombination_insertion_FBgn0037275_ENCFF315VBV
ENCSR237AMN.CG14655.adult_whole-fly_site-specific-recombination_insertion_FBgn0037275	ENCSR237AMN	CG14655	FBgn0037275	adult	whole-fly	NA	whole-fly,site-specific-recombination,insertion	FALSE	FALSE	remap2022_ENCSR237AMN.CG14655.adult_whole-fly_site-specific-recombination_insertion_FBgn0037275_ENCFF789BFM,remap2022_ENCSR237AMN.CG14655.adult_whole-fly_site-specific-recombination_insertion_FBgn0037275_ENCFF999DGP,remap2022_ENCSR237AMN.CG14655.adult_whole-fly_site-specific-recombination_insertion_FBgn0037275_ENCFF315VBV
ENCSR237AMN.CG14655.adult_whole-fly_site-specific-recombination_insertion_FBgn0037275	ENCSR237AMN	CG14655	FBgn0037275	adult	whole-fly	NA	whole-fly,site-specific-recombination,insertion	FALSE	FALSE	remap2022_ENCSR237AMN.CG14655.adult_whole-fly_site-specific-recombination_insertion_FBgn0037275_ENCFF789BFM,remap2022_ENCSR237AMN.CG14655.adult_whole-fly_site-specific-recombination_insertion_FBgn0037275_ENCFF999DGP,remap2022_ENCSR237AMN.CG14655.adult_whole-fly_site-specific-recombination_insertion_FBgn0037275_ENCFF315VBV
ENCSR237PJC.CG15601.adult_whole-fly_site-specific-recombination_insertion_FBgn0030673	ENCSR237PJC	CG15601	FBgn0030673	adult	whole-fly	NA	whole-fly,site-specific-recombination,insertion	FALSE	FALSE	remap2022_ENCSR237PJC.CG15601.adult_whole-fly_site-specific-recombination_insertion_FBgn0030673_ENCFF402QDK,remap2022_ENCSR237PJC.CG15601.adult_whole-fly_site-specific-recombination_insertion_FBgn0030673_ENCFF199ZLH,remap2022_ENCSR237PJC.CG15601.adult_whole-fly_site-specific-recombination_insertion_FBgn0030673_ENCFF573YQS
ENCSR237PJC.CG15601.adult_whole-fly_site-specific-recombination_insertion_FBgn0030673	ENCSR237PJC	CG15601	FBgn0030673	adult	whole-fly	NA	whole-fly,site-specific-recombination,insertion	FALSE	FALSE	remap2022_ENCSR237PJC.CG15601.adult_whole-fly_site-specific-recombination_insertion_FBgn0030673_ENCFF402QDK,remap2022_ENCSR237PJC.CG15601.adult_whole-fly_site-specific-recombination_insertion_FBgn0030673_ENCFF199ZLH,remap2022_ENCSR237PJC.CG15601.adult_whole-fly_site-specific-recombination_insertion_FBgn0030673_ENCFF573YQS
ENCSR237PJC.CG15601.adult_whole-fly_site-specific-recombination_insertion_FBgn0030673	ENCSR237PJC	CG15601	FBgn0030673	adult	whole-fly	NA	whole-fly,site-specific-recombination,insertion	FALSE	FALSE	remap2022_ENCSR237PJC.CG15601.adult_whole-fly_site-specific-recombination_insertion_FBgn0030673_ENCFF402QDK,remap2022_ENCSR237PJC.CG15601.adult_whole-fly_site-specific-recombination_insertion_FBgn0030673_ENCFF199ZLH,remap2022_ENCSR237PJC.CG15601.adult_whole-fly_site-specific-recombination_insertion_FBgn0030673_ENCFF573YQS
ENCSR239MPW.caup.adult_whole-fly_site-specific-recombination_insertion_FBgn0015919	ENCSR239MPW	caup	FBgn0015919	adult	whole-fly	NA	whole-fly,site-specific-recombination,insertion	FALSE	FALSE	remap2022_ENCSR239MPW.caup.adult_whole-fly_site-specific-recombination_insertion_FBgn0015919_ENCFF930OSI,remap2022_ENCSR239MPW.caup.adult_whole-fly_site-specific-recombination_insertion_FBgn0015919_ENCFF618SPJ,remap2022_ENCSR239MPW.caup.adult_whole-fly_site-specific-recombination_insertion_FBgn0015919_ENCFF006CZV
ENCSR239MPW.caup.adult_whole-fly_site-specific-recombination_insertion_FBgn0015919	ENCSR239MPW	caup	FBgn0015919	adult	whole-fly	NA	whole-fly,site-specific-recombination,insertion	FALSE	FALSE	remap2022_ENCSR239MPW.caup.adult_whole-fly_site-specific-recombination_insertion_FBgn0015919_ENCFF930OSI,remap2022_ENCSR239MPW.caup.adult_whole-fly_site-specific-recombination_insertion_FBgn0015919_ENCFF618SPJ,remap2022_ENCSR239MPW.caup.adult_whole-fly_site-specific-recombination_insertion_FBgn0015919_ENCFF006CZV
ENCSR239MPW.caup.adult_whole-fly_site-specific-recombination_insertion_FBgn0015919	ENCSR239MPW	caup	FBgn0015919	adult	whole-fly	NA	whole-fly,site-specific-recombination,insertion	FALSE	FALSE	remap2022_ENCSR239MPW.caup.adult_whole-fly_site-specific-recombination_insertion_FBgn0015919_ENCFF930OSI,remap2022_ENCSR239MPW.caup.adult_whole-fly_site-specific-recombination_insertion_FBgn0015919_ENCFF618SPJ,remap2022_ENCSR239MPW.caup.adult_whole-fly_site-specific-recombination_insertion_FBgn0015919_ENCFF006CZV
ENCSR239YEX.Hr83.adult_whole-fly_site-specific-recombination_insertion_FBgn0037436	ENCSR239YEX	Hr83	FBgn0037436	adult	whole-fly	NA	whole-fly,site-specific-recombination,insertion	FALSE	FALSE	remap2022_ENCSR239YEX.Hr83.adult_whole-fly_site-specific-recombination_insertion_FBgn0037436_ENCFF301FZB,remap2022_ENCSR239YEX.Hr83.adult_whole-fly_site-specific-recombination_insertion_FBgn0037436_ENCFF787ZJM
ENCSR239YEX.Hr83.adult_whole-fly_site-specific-recombination_insertion_FBgn0037436	ENCSR239YEX	Hr83	FBgn0037436	adult	whole-fly	NA	whole-fly,site-specific-recombination,insertion	FALSE	FALSE	remap2022_ENCSR239YEX.Hr83.adult_whole-fly_site-specific-recombination_insertion_FBgn0037436_ENCFF301FZB,remap2022_ENCSR239YEX.Hr83.adult_whole-fly_site-specific-recombination_insertion_FBgn0037436_ENCFF787ZJM
ENCSR240ADR.Stat92E.adult_whole-fly_insertion_FBgn0016917	ENCSR240ADR	Stat92E	FBgn0016917	adult	whole-fly	NA	whole-fly,insertion	FALSE	FALSE	remap2022_ENCSR240ADR.Stat92E.adult_whole-fly_insertion_FBgn0016917_ENCFF047YGA,remap2022_ENCSR240ADR.Stat92E.adult_whole-fly_insertion_FBgn0016917_ENCFF274EPE
ENCSR240ADR.Stat92E.adult_whole-fly_insertion_FBgn0016917	ENCSR240ADR	Stat92E	FBgn0016917	adult	whole-fly	NA	whole-fly,insertion	FALSE	FALSE	remap2022_ENCSR240ADR.Stat92E.adult_whole-fly_insertion_FBgn0016917_ENCFF047YGA,remap2022_ENCSR240ADR.Stat92E.adult_whole-fly_insertion_FBgn0016917_ENCFF274EPE
ENCSR240NHL.ac.adult_whole-fly_site-specific-recombination_insertion_FBgn0000022	ENCSR240NHL	ac	FBgn0000022	adult	whole-fly	NA	whole-fly,site-specific-recombination,insertion	FALSE	FALSE	remap2022_ENCSR240NHL.ac.adult_whole-fly_site-specific-recombination_insertion_FBgn0000022_ENCFF074IQX,remap2022_ENCSR240NHL.ac.adult_whole-fly_site-specific-recombination_insertion_FBgn0000022_ENCFF539QLM,remap2022_ENCSR240NHL.ac.adult_whole-fly_site-specific-recombination_insertion_FBgn0000022_ENCFF472EHD
ENCSR240NHL.ac.adult_whole-fly_site-specific-recombination_insertion_FBgn0000022	ENCSR240NHL	ac	FBgn0000022	adult	whole-fly	NA	whole-fly,site-specific-recombination,insertion	FALSE	FALSE	remap2022_ENCSR240NHL.ac.adult_whole-fly_site-specific-recombination_insertion_FBgn0000022_ENCFF074IQX,remap2022_ENCSR240NHL.ac.adult_whole-fly_site-specific-recombination_insertion_FBgn0000022_ENCFF539QLM,remap2022_ENCSR240NHL.ac.adult_whole-fly_site-specific-recombination_insertion_FBgn0000022_ENCFF472EHD
ENCSR240NHL.ac.adult_whole-fly_site-specific-recombination_insertion_FBgn0000022	ENCSR240NHL	ac	FBgn0000022	adult	whole-fly	NA	whole-fly,site-specific-recombination,insertion	FALSE	FALSE	remap2022_ENCSR240NHL.ac.adult_whole-fly_site-specific-recombination_insertion_FBgn0000022_ENCFF074IQX,remap2022_ENCSR240NHL.ac.adult_whole-fly_site-specific-recombination_insertion_FBgn0000022_ENCFF539QLM,remap2022_ENCSR240NHL.ac.adult_whole-fly_site-specific-recombination_insertion_FBgn0000022_ENCFF472EHD
ENCSR245UCO.GATAd.adult_whole-fly_site-specific-recombination_insertion_FBgn0032223	ENCSR245UCO	GATAd	FBgn0032223	adult	whole-fly	NA	whole-fly,site-specific-recombination,insertion	FALSE	FALSE	remap2022_ENCSR245UCO.GATAd.adult_whole-fly_site-specific-recombination_insertion_FBgn0032223_ENCFF605NWM,remap2022_ENCSR245UCO.GATAd.adult_whole-fly_site-specific-recombination_insertion_FBgn0032223_ENCFF090JEI
ENCSR245UCO.GATAd.adult_whole-fly_site-specific-recombination_insertion_FBgn0032223	ENCSR245UCO	GATAd	FBgn0032223	adult	whole-fly	NA	whole-fly,site-specific-recombination,insertion	FALSE	FALSE	remap2022_ENCSR245UCO.GATAd.adult_whole-fly_site-specific-recombination_insertion_FBgn0032223_ENCFF605NWM,remap2022_ENCSR245UCO.GATAd.adult_whole-fly_site-specific-recombination_insertion_FBgn0032223_ENCFF090JEI
ENCSR247CPK.CG1792.adult_whole-fly_site-specific-recombination_insertion_FBgn0039860	ENCSR247CPK	CG1792	FBgn0039860	adult	whole-fly	NA	whole-fly,site-specific-recombination,insertion	FALSE	FALSE	remap2022_ENCSR247CPK.CG1792.adult_whole-fly_site-specific-recombination_insertion_FBgn0039860_ENCFF392SFO,remap2022_ENCSR247CPK.CG1792.adult_whole-fly_site-specific-recombination_insertion_FBgn0039860_ENCFF378BKS
ENCSR247CPK.CG1792.adult_whole-fly_site-specific-recombination_insertion_FBgn0039860	ENCSR247CPK	CG1792	FBgn0039860	adult	whole-fly	NA	whole-fly,site-specific-recombination,insertion	FALSE	FALSE	remap2022_ENCSR247CPK.CG1792.adult_whole-fly_site-specific-recombination_insertion_FBgn0039860_ENCFF392SFO,remap2022_ENCSR247CPK.CG1792.adult_whole-fly_site-specific-recombination_insertion_FBgn0039860_ENCFF378BKS
ENCSR247ZVM.cato.adult_whole-fly_site-specific-recombination_insertion_FBgn0024249	ENCSR247ZVM	cato	FBgn0024249	adult	whole-fly	NA	whole-fly,site-specific-recombination,insertion	FALSE	FALSE	remap2022_ENCSR247ZVM.cato.adult_whole-fly_site-specific-recombination_insertion_FBgn0024249_ENCFF134VPP,remap2022_ENCSR247ZVM.cato.adult_whole-fly_site-specific-recombination_insertion_FBgn0024249_ENCFF633HHV
ENCSR247ZVM.cato.adult_whole-fly_site-specific-recombination_insertion_FBgn0024249	ENCSR247ZVM	cato	FBgn0024249	adult	whole-fly	NA	whole-fly,site-specific-recombination,insertion	FALSE	FALSE	remap2022_ENCSR247ZVM.cato.adult_whole-fly_site-specific-recombination_insertion_FBgn0024249_ENCFF134VPP,remap2022_ENCSR247ZVM.cato.adult_whole-fly_site-specific-recombination_insertion_FBgn0024249_ENCFF633HHV
ENCSR248JJL.chn.adult_whole-fly_site-specific-recombination_insertion_FBgn0015371	ENCSR248JJL	chn	FBgn0015371	adult	whole-fly	NA	whole-fly,site-specific-recombination,insertion	FALSE	FALSE	remap2022_ENCSR248JJL.chn.adult_whole-fly_site-specific-recombination_insertion_FBgn0015371_ENCFF222XRD,remap2022_ENCSR248JJL.chn.adult_whole-fly_site-specific-recombination_insertion_FBgn0015371_ENCFF363RWB
ENCSR248JJL.chn.adult_whole-fly_site-specific-recombination_insertion_FBgn0015371	ENCSR248JJL	chn	FBgn0015371	adult	whole-fly	NA	whole-fly,site-specific-recombination,insertion	FALSE	FALSE	remap2022_ENCSR248JJL.chn.adult_whole-fly_site-specific-recombination_insertion_FBgn0015371_ENCFF222XRD,remap2022_ENCSR248JJL.chn.adult_whole-fly_site-specific-recombination_insertion_FBgn0015371_ENCFF363RWB
ENCSR249JVE.hth.adult_whole-fly_FBgn0001235	ENCSR249JVE	hth	FBgn0001235	adult	whole-fly	NA	whole-fly	FALSE	FALSE	remap2022_ENCSR249JVE.hth.adult_whole-fly_FBgn0001235_ENCFF655BBR,remap2022_ENCSR249JVE.hth.adult_whole-fly_FBgn0001235_ENCFF202MEC
ENCSR249JVE.hth.adult_whole-fly_FBgn0001235	ENCSR249JVE	hth	FBgn0001235	adult	whole-fly	NA	whole-fly	FALSE	FALSE	remap2022_ENCSR249JVE.hth.adult_whole-fly_FBgn0001235_ENCFF655BBR,remap2022_ENCSR249JVE.hth.adult_whole-fly_FBgn0001235_ENCFF202MEC
ENCSR255PHG.CG6276.adult_whole-fly_site-specific-recombination_insertion_FBgn0038316	ENCSR255PHG	CG6276	FBgn0038316	adult	whole-fly	NA	whole-fly,site-specific-recombination,insertion	FALSE	FALSE	remap2022_ENCSR255PHG.CG6276.adult_whole-fly_site-specific-recombination_insertion_FBgn0038316_ENCFF539JUF,remap2022_ENCSR255PHG.CG6276.adult_whole-fly_site-specific-recombination_insertion_FBgn0038316_ENCFF418FNJ
ENCSR255PHG.CG6276.adult_whole-fly_site-specific-recombination_insertion_FBgn0038316	ENCSR255PHG	CG6276	FBgn0038316	adult	whole-fly	NA	whole-fly,site-specific-recombination,insertion	FALSE	FALSE	remap2022_ENCSR255PHG.CG6276.adult_whole-fly_site-specific-recombination_insertion_FBgn0038316_ENCFF539JUF,remap2022_ENCSR255PHG.CG6276.adult_whole-fly_site-specific-recombination_insertion_FBgn0038316_ENCFF418FNJ
ENCSR259WOE.zfh2.adult_whole-fly_site-specific-recombination_insertion_FBgn0004607	ENCSR259WOE	zfh2	FBgn0004607	adult	whole-fly	NA	whole-fly,site-specific-recombination,insertion	FALSE	FALSE	remap2022_ENCSR259WOE.zfh2.adult_whole-fly_site-specific-recombination_insertion_FBgn0004607_ENCFF011LNH,remap2022_ENCSR259WOE.zfh2.adult_whole-fly_site-specific-recombination_insertion_FBgn0004607_ENCFF374TTF
ENCSR259WOE.zfh2.adult_whole-fly_site-specific-recombination_insertion_FBgn0004607	ENCSR259WOE	zfh2	FBgn0004607	adult	whole-fly	NA	whole-fly,site-specific-recombination,insertion	FALSE	FALSE	remap2022_ENCSR259WOE.zfh2.adult_whole-fly_site-specific-recombination_insertion_FBgn0004607_ENCFF011LNH,remap2022_ENCSR259WOE.zfh2.adult_whole-fly_site-specific-recombination_insertion_FBgn0004607_ENCFF374TTF
ENCSR261RKJ.MTF-1.adult_whole-fly_site-specific-recombination_insertion_FBgn0040305	ENCSR261RKJ	MTF-1	FBgn0040305	adult	whole-fly	NA	whole-fly,site-specific-recombination,insertion	FALSE	FALSE	remap2022_ENCSR261RKJ.MTF-1.adult_whole-fly_site-specific-recombination_insertion_FBgn0040305_ENCFF170HFA,remap2022_ENCSR261RKJ.MTF-1.adult_whole-fly_site-specific-recombination_insertion_FBgn0040305_ENCFF420DBJ
ENCSR261RKJ.MTF-1.adult_whole-fly_site-specific-recombination_insertion_FBgn0040305	ENCSR261RKJ	MTF-1	FBgn0040305	adult	whole-fly	NA	whole-fly,site-specific-recombination,insertion	FALSE	FALSE	remap2022_ENCSR261RKJ.MTF-1.adult_whole-fly_site-specific-recombination_insertion_FBgn0040305_ENCFF170HFA,remap2022_ENCSR261RKJ.MTF-1.adult_whole-fly_site-specific-recombination_insertion_FBgn0040305_ENCFF420DBJ
ENCSR263AYM.CG3281.adult_whole-fly_site-specific-recombination_insertion_FBgn0260741	ENCSR263AYM	CG3281	FBgn0260741	adult	whole-fly	NA	whole-fly,site-specific-recombination,insertion	FALSE	FALSE	remap2022_ENCSR263AYM.CG3281.adult_whole-fly_site-specific-recombination_insertion_FBgn0260741_ENCFF041PBW,remap2022_ENCSR263AYM.CG3281.adult_whole-fly_site-specific-recombination_insertion_FBgn0260741_ENCFF349MZB,remap2022_ENCSR263AYM.CG3281.adult_whole-fly_site-specific-recombination_insertion_FBgn0260741_ENCFF942JQS
ENCSR263AYM.CG3281.adult_whole-fly_site-specific-recombination_insertion_FBgn0260741	ENCSR263AYM	CG3281	FBgn0260741	adult	whole-fly	NA	whole-fly,site-specific-recombination,insertion	FALSE	FALSE	remap2022_ENCSR263AYM.CG3281.adult_whole-fly_site-specific-recombination_insertion_FBgn0260741_ENCFF041PBW,remap2022_ENCSR263AYM.CG3281.adult_whole-fly_site-specific-recombination_insertion_FBgn0260741_ENCFF349MZB,remap2022_ENCSR263AYM.CG3281.adult_whole-fly_site-specific-recombination_insertion_FBgn0260741_ENCFF942JQS
ENCSR263AYM.CG3281.adult_whole-fly_site-specific-recombination_insertion_FBgn0260741	ENCSR263AYM	CG3281	FBgn0260741	adult	whole-fly	NA	whole-fly,site-specific-recombination,insertion	FALSE	FALSE	remap2022_ENCSR263AYM.CG3281.adult_whole-fly_site-specific-recombination_insertion_FBgn0260741_ENCFF041PBW,remap2022_ENCSR263AYM.CG3281.adult_whole-fly_site-specific-recombination_insertion_FBgn0260741_ENCFF349MZB,remap2022_ENCSR263AYM.CG3281.adult_whole-fly_site-specific-recombination_insertion_FBgn0260741_ENCFF942JQS
ENCSR264MBG.Sin3A.Kc167_FBgn0022764	ENCSR264MBG	Sin3A	FBgn0022764	Kc	Kc	NA		FALSE	FALSE	remap2022_ENCSR264MBG.Sin3A.Kc167_FBgn0022764_ENCFF515LPH,remap2022_ENCSR264MBG.Sin3A.Kc167_FBgn0022764_ENCFF708WHR
ENCSR264MBG.Sin3A.Kc167_FBgn0022764	ENCSR264MBG	Sin3A	FBgn0022764	Kc	Kc	NA		FALSE	FALSE	remap2022_ENCSR264MBG.Sin3A.Kc167_FBgn0022764_ENCFF515LPH,remap2022_ENCSR264MBG.Sin3A.Kc167_FBgn0022764_ENCFF708WHR
ENCSR266CSS.CG3407.adult_whole-fly_site-specific-recombination_insertion_FBgn0031573	ENCSR266CSS	CG3407	FBgn0031573	adult	whole-fly	NA	whole-fly,site-specific-recombination,insertion	FALSE	FALSE	remap2022_ENCSR266CSS.CG3407.adult_whole-fly_site-specific-recombination_insertion_FBgn0031573_ENCFF462CVJ,remap2022_ENCSR266CSS.CG3407.adult_whole-fly_site-specific-recombination_insertion_FBgn0031573_ENCFF480IIJ
ENCSR266CSS.CG3407.adult_whole-fly_site-specific-recombination_insertion_FBgn0031573	ENCSR266CSS	CG3407	FBgn0031573	adult	whole-fly	NA	whole-fly,site-specific-recombination,insertion	FALSE	FALSE	remap2022_ENCSR266CSS.CG3407.adult_whole-fly_site-specific-recombination_insertion_FBgn0031573_ENCFF462CVJ,remap2022_ENCSR266CSS.CG3407.adult_whole-fly_site-specific-recombination_insertion_FBgn0031573_ENCFF480IIJ
ENCSR266HYG.oc.adult_whole-fly_site-specific-recombination_insertion_FBgn0004102	ENCSR266HYG	oc	FBgn0004102	adult	whole-fly	NA	whole-fly,site-specific-recombination,insertion	FALSE	FALSE	remap2022_ENCSR266HYG.oc.adult_whole-fly_site-specific-recombination_insertion_FBgn0004102_ENCFF919OIL,remap2022_ENCSR266HYG.oc.adult_whole-fly_site-specific-recombination_insertion_FBgn0004102_ENCFF043HET
ENCSR266HYG.oc.adult_whole-fly_site-specific-recombination_insertion_FBgn0004102	ENCSR266HYG	oc	FBgn0004102	adult	whole-fly	NA	whole-fly,site-specific-recombination,insertion	FALSE	FALSE	remap2022_ENCSR266HYG.oc.adult_whole-fly_site-specific-recombination_insertion_FBgn0004102_ENCFF919OIL,remap2022_ENCSR266HYG.oc.adult_whole-fly_site-specific-recombination_insertion_FBgn0004102_ENCFF043HET
ENCSR269HHK.kay.adult_whole-fly_site-specific-recombination_insertion_FBgn0001297	ENCSR269HHK	kay	FBgn0001297	adult	whole-fly	NA	whole-fly,site-specific-recombination,insertion	FALSE	FALSE	remap2022_ENCSR269HHK.kay.adult_whole-fly_site-specific-recombination_insertion_FBgn0001297_ENCFF347ECN,remap2022_ENCSR269HHK.kay.adult_whole-fly_site-specific-recombination_insertion_FBgn0001297_ENCFF087WXT
ENCSR269HHK.kay.adult_whole-fly_site-specific-recombination_insertion_FBgn0001297	ENCSR269HHK	kay	FBgn0001297	adult	whole-fly	NA	whole-fly,site-specific-recombination,insertion	FALSE	FALSE	remap2022_ENCSR269HHK.kay.adult_whole-fly_site-specific-recombination_insertion_FBgn0001297_ENCFF347ECN,remap2022_ENCSR269HHK.kay.adult_whole-fly_site-specific-recombination_insertion_FBgn0001297_ENCFF087WXT
ENCSR271OGF.prd.adult_whole-fly_FBgn0003145	ENCSR271OGF	prd	FBgn0003145	adult	whole-fly	NA	whole-fly	FALSE	FALSE	remap2022_ENCSR271OGF.prd.adult_whole-fly_FBgn0003145_ENCFF529KSE,remap2022_ENCSR271OGF.prd.adult_whole-fly_FBgn0003145_ENCFF720TUS
ENCSR271OGF.prd.adult_whole-fly_FBgn0003145	ENCSR271OGF	prd	FBgn0003145	adult	whole-fly	NA	whole-fly	FALSE	FALSE	remap2022_ENCSR271OGF.prd.adult_whole-fly_FBgn0003145_ENCFF529KSE,remap2022_ENCSR271OGF.prd.adult_whole-fly_FBgn0003145_ENCFF720TUS
ENCSR271VMW.Hr38.adult_whole-fly_site-specific-recombination_insertion_FBgn0014859	ENCSR271VMW	Hr38	FBgn0014859	adult	whole-fly	NA	whole-fly,site-specific-recombination,insertion	FALSE	FALSE	remap2022_ENCSR271VMW.Hr38.adult_whole-fly_site-specific-recombination_insertion_FBgn0014859_ENCFF808COC,remap2022_ENCSR271VMW.Hr38.adult_whole-fly_site-specific-recombination_insertion_FBgn0014859_ENCFF812KUG
ENCSR271VMW.Hr38.adult_whole-fly_site-specific-recombination_insertion_FBgn0014859	ENCSR271VMW	Hr38	FBgn0014859	adult	whole-fly	NA	whole-fly,site-specific-recombination,insertion	FALSE	FALSE	remap2022_ENCSR271VMW.Hr38.adult_whole-fly_site-specific-recombination_insertion_FBgn0014859_ENCFF808COC,remap2022_ENCSR271VMW.Hr38.adult_whole-fly_site-specific-recombination_insertion_FBgn0014859_ENCFF812KUG
ENCSR271ZJI.REPTOR-BP.adult_whole-fly_site-specific-recombination_insertion_FBgn0032202	ENCSR271ZJI	REPTOR-BP	FBgn0032202	adult	whole-fly	NA	whole-fly,site-specific-recombination,insertion	FALSE	FALSE	remap2022_ENCSR271ZJI.REPTOR-BP.adult_whole-fly_site-specific-recombination_insertion_FBgn0032202_ENCFF015AHM,remap2022_ENCSR271ZJI.REPTOR-BP.adult_whole-fly_site-specific-recombination_insertion_FBgn0032202_ENCFF555QHM,remap2022_ENCSR271ZJI.REPTOR-BP.adult_whole-fly_site-specific-recombination_insertion_FBgn0032202_ENCFF740ACJ
ENCSR271ZJI.REPTOR-BP.adult_whole-fly_site-specific-recombination_insertion_FBgn0032202	ENCSR271ZJI	REPTOR-BP	FBgn0032202	adult	whole-fly	NA	whole-fly,site-specific-recombination,insertion	FALSE	FALSE	remap2022_ENCSR271ZJI.REPTOR-BP.adult_whole-fly_site-specific-recombination_insertion_FBgn0032202_ENCFF015AHM,remap2022_ENCSR271ZJI.REPTOR-BP.adult_whole-fly_site-specific-recombination_insertion_FBgn0032202_ENCFF555QHM,remap2022_ENCSR271ZJI.REPTOR-BP.adult_whole-fly_site-specific-recombination_insertion_FBgn0032202_ENCFF740ACJ
ENCSR271ZJI.REPTOR-BP.adult_whole-fly_site-specific-recombination_insertion_FBgn0032202	ENCSR271ZJI	REPTOR-BP	FBgn0032202	adult	whole-fly	NA	whole-fly,site-specific-recombination,insertion	FALSE	FALSE	remap2022_ENCSR271ZJI.REPTOR-BP.adult_whole-fly_site-specific-recombination_insertion_FBgn0032202_ENCFF015AHM,remap2022_ENCSR271ZJI.REPTOR-BP.adult_whole-fly_site-specific-recombination_insertion_FBgn0032202_ENCFF555QHM,remap2022_ENCSR271ZJI.REPTOR-BP.adult_whole-fly_site-specific-recombination_insertion_FBgn0032202_ENCFF740ACJ
ENCSR272DEA.Lhr.adult_whole-fly_site-specific-recombination_insertion_FBgn0034217	ENCSR272DEA	Lhr	FBgn0034217	adult	whole-fly	NA	whole-fly,site-specific-recombination,insertion	FALSE	FALSE	remap2022_ENCSR272DEA.Lhr.adult_whole-fly_site-specific-recombination_insertion_FBgn0034217_ENCFF732HNJ,remap2022_ENCSR272DEA.Lhr.adult_whole-fly_site-specific-recombination_insertion_FBgn0034217_ENCFF714SJG,remap2022_ENCSR272DEA.Lhr.adult_whole-fly_site-specific-recombination_insertion_FBgn0034217_ENCFF023KQA
ENCSR272DEA.Lhr.adult_whole-fly_site-specific-recombination_insertion_FBgn0034217	ENCSR272DEA	Lhr	FBgn0034217	adult	whole-fly	NA	whole-fly,site-specific-recombination,insertion	FALSE	FALSE	remap2022_ENCSR272DEA.Lhr.adult_whole-fly_site-specific-recombination_insertion_FBgn0034217_ENCFF732HNJ,remap2022_ENCSR272DEA.Lhr.adult_whole-fly_site-specific-recombination_insertion_FBgn0034217_ENCFF714SJG,remap2022_ENCSR272DEA.Lhr.adult_whole-fly_site-specific-recombination_insertion_FBgn0034217_ENCFF023KQA
ENCSR272DEA.Lhr.adult_whole-fly_site-specific-recombination_insertion_FBgn0034217	ENCSR272DEA	Lhr	FBgn0034217	adult	whole-fly	NA	whole-fly,site-specific-recombination,insertion	FALSE	FALSE	remap2022_ENCSR272DEA.Lhr.adult_whole-fly_site-specific-recombination_insertion_FBgn0034217_ENCFF732HNJ,remap2022_ENCSR272DEA.Lhr.adult_whole-fly_site-specific-recombination_insertion_FBgn0034217_ENCFF714SJG,remap2022_ENCSR272DEA.Lhr.adult_whole-fly_site-specific-recombination_insertion_FBgn0034217_ENCFF023KQA
ENCSR273JZM.crc.adult_whole-fly_site-specific-recombination_insertion_FBgn0000370	ENCSR273JZM	crc	FBgn0000370	adult	whole-fly	NA	whole-fly,site-specific-recombination,insertion	FALSE	FALSE	remap2022_ENCSR273JZM.crc.adult_whole-fly_site-specific-recombination_insertion_FBgn0000370_ENCFF564QUD,remap2022_ENCSR273JZM.crc.adult_whole-fly_site-specific-recombination_insertion_FBgn0000370_ENCFF015CCD
ENCSR273JZM.crc.adult_whole-fly_site-specific-recombination_insertion_FBgn0000370	ENCSR273JZM	crc	FBgn0000370	adult	whole-fly	NA	whole-fly,site-specific-recombination,insertion	FALSE	FALSE	remap2022_ENCSR273JZM.crc.adult_whole-fly_site-specific-recombination_insertion_FBgn0000370_ENCFF564QUD,remap2022_ENCSR273JZM.crc.adult_whole-fly_site-specific-recombination_insertion_FBgn0000370_ENCFF015CCD
ENCSR274AAR.CG8924.adult_whole-fly_site-specific-recombination_insertion_FBgn0030710	ENCSR274AAR	CG8924	FBgn0030710	adult	whole-fly	NA	whole-fly,site-specific-recombination,insertion	FALSE	FALSE	remap2022_ENCSR274AAR.CG8924.adult_whole-fly_site-specific-recombination_insertion_FBgn0030710_ENCFF885IEG,remap2022_ENCSR274AAR.CG8924.adult_whole-fly_site-specific-recombination_insertion_FBgn0030710_ENCFF458ZOA,remap2022_ENCSR274AAR.CG8924.adult_whole-fly_site-specific-recombination_insertion_FBgn0030710_ENCFF786PCN,remap2022_ENCSR274AAR.CG8924.adult_whole-fly_site-specific-recombination_inser…
ENCSR274AAR.CG8924.adult_whole-fly_site-specific-recombination_insertion_FBgn0030710	ENCSR274AAR	CG8924	FBgn0030710	adult	whole-fly	NA	whole-fly,site-specific-recombination,insertion	FALSE	FALSE	remap2022_ENCSR274AAR.CG8924.adult_whole-fly_site-specific-recombination_insertion_FBgn0030710_ENCFF885IEG,remap2022_ENCSR274AAR.CG8924.adult_whole-fly_site-specific-recombination_insertion_FBgn0030710_ENCFF458ZOA,remap2022_ENCSR274AAR.CG8924.adult_whole-fly_site-specific-recombination_insertion_FBgn0030710_ENCFF786PCN,remap2022_ENCSR274AAR.CG8924.adult_whole-fly_site-specific-recombination_inser…
ENCSR274AAR.CG8924.adult_whole-fly_site-specific-recombination_insertion_FBgn0030710	ENCSR274AAR	CG8924	FBgn0030710	adult	whole-fly	NA	whole-fly,site-specific-recombination,insertion	FALSE	FALSE	remap2022_ENCSR274AAR.CG8924.adult_whole-fly_site-specific-recombination_insertion_FBgn0030710_ENCFF885IEG,remap2022_ENCSR274AAR.CG8924.adult_whole-fly_site-specific-recombination_insertion_FBgn0030710_ENCFF458ZOA,remap2022_ENCSR274AAR.CG8924.adult_whole-fly_site-specific-recombination_insertion_FBgn0030710_ENCFF786PCN,remap2022_ENCSR274AAR.CG8924.adult_whole-fly_site-specific-recombination_inser…
ENCSR274AAR.CG8924.adult_whole-fly_site-specific-recombination_insertion_FBgn0030710	ENCSR274AAR	CG8924	FBgn0030710	adult	whole-fly	NA	whole-fly,site-specific-recombination,insertion	FALSE	FALSE	remap2022_ENCSR274AAR.CG8924.adult_whole-fly_site-specific-recombination_insertion_FBgn0030710_ENCFF885IEG,remap2022_ENCSR274AAR.CG8924.adult_whole-fly_site-specific-recombination_insertion_FBgn0030710_ENCFF458ZOA,remap2022_ENCSR274AAR.CG8924.adult_whole-fly_site-specific-recombination_insertion_FBgn0030710_ENCFF786PCN,remap2022_ENCSR274AAR.CG8924.adult_whole-fly_site-specific-recombination_inser…
ENCSR276LGX.salm.adult_whole-fly_site-specific-recombination_insertion_FBgn0261648	ENCSR276LGX	salm	FBgn0261648	adult	whole-fly	NA	whole-fly,site-specific-recombination,insertion	FALSE	FALSE	remap2022_ENCSR276LGX.salm.adult_whole-fly_site-specific-recombination_insertion_FBgn0261648_ENCFF379KRE,remap2022_ENCSR276LGX.salm.adult_whole-fly_site-specific-recombination_insertion_FBgn0261648_ENCFF317GTJ
ENCSR276LGX.salm.adult_whole-fly_site-specific-recombination_insertion_FBgn0261648	ENCSR276LGX	salm	FBgn0261648	adult	whole-fly	NA	whole-fly,site-specific-recombination,insertion	FALSE	FALSE	remap2022_ENCSR276LGX.salm.adult_whole-fly_site-specific-recombination_insertion_FBgn0261648_ENCFF379KRE,remap2022_ENCSR276LGX.salm.adult_whole-fly_site-specific-recombination_insertion_FBgn0261648_ENCFF317GTJ
ENCSR278IBK.CG6808.adult_whole-fly_site-specific-recombination_insertion_FBgn0037921	ENCSR278IBK	CG6808	FBgn0037921	adult	whole-fly	NA	whole-fly,site-specific-recombination,insertion	FALSE	FALSE	remap2022_ENCSR278IBK.CG6808.adult_whole-fly_site-specific-recombination_insertion_FBgn0037921_ENCFF739GXL,remap2022_ENCSR278IBK.CG6808.adult_whole-fly_site-specific-recombination_insertion_FBgn0037921_ENCFF291HKL,remap2022_ENCSR278IBK.CG6808.adult_whole-fly_site-specific-recombination_insertion_FBgn0037921_ENCFF448AQX
ENCSR278IBK.CG6808.adult_whole-fly_site-specific-recombination_insertion_FBgn0037921	ENCSR278IBK	CG6808	FBgn0037921	adult	whole-fly	NA	whole-fly,site-specific-recombination,insertion	FALSE	FALSE	remap2022_ENCSR278IBK.CG6808.adult_whole-fly_site-specific-recombination_insertion_FBgn0037921_ENCFF739GXL,remap2022_ENCSR278IBK.CG6808.adult_whole-fly_site-specific-recombination_insertion_FBgn0037921_ENCFF291HKL,remap2022_ENCSR278IBK.CG6808.adult_whole-fly_site-specific-recombination_insertion_FBgn0037921_ENCFF448AQX
ENCSR278IBK.CG6808.adult_whole-fly_site-specific-recombination_insertion_FBgn0037921	ENCSR278IBK	CG6808	FBgn0037921	adult	whole-fly	NA	whole-fly,site-specific-recombination,insertion	FALSE	FALSE	remap2022_ENCSR278IBK.CG6808.adult_whole-fly_site-specific-recombination_insertion_FBgn0037921_ENCFF739GXL,remap2022_ENCSR278IBK.CG6808.adult_whole-fly_site-specific-recombination_insertion_FBgn0037921_ENCFF291HKL,remap2022_ENCSR278IBK.CG6808.adult_whole-fly_site-specific-recombination_insertion_FBgn0037921_ENCFF448AQX
ENCSR279HMO.crp.adult_whole-fly_site-specific-recombination_insertion_FBgn0001994	ENCSR279HMO	crp	FBgn0001994	adult	whole-fly	NA	whole-fly,site-specific-recombination,insertion	FALSE	FALSE	remap2022_ENCSR279HMO.crp.adult_whole-fly_site-specific-recombination_insertion_FBgn0001994_ENCFF814LXY,remap2022_ENCSR279HMO.crp.adult_whole-fly_site-specific-recombination_insertion_FBgn0001994_ENCFF210ATC
ENCSR279HMO.crp.adult_whole-fly_site-specific-recombination_insertion_FBgn0001994	ENCSR279HMO	crp	FBgn0001994	adult	whole-fly	NA	whole-fly,site-specific-recombination,insertion	FALSE	FALSE	remap2022_ENCSR279HMO.crp.adult_whole-fly_site-specific-recombination_insertion_FBgn0001994_ENCFF814LXY,remap2022_ENCSR279HMO.crp.adult_whole-fly_site-specific-recombination_insertion_FBgn0001994_ENCFF210ATC
ENCSR280XEB.Hr78.adult_whole-fly_insertion_FBgn0015239	ENCSR280XEB	Hr78	FBgn0015239	adult	whole-fly	NA	whole-fly,insertion	FALSE	FALSE	remap2022_ENCSR280XEB.Hr78.adult_whole-fly_insertion_FBgn0015239_ENCFF319IIP,remap2022_ENCSR280XEB.Hr78.adult_whole-fly_insertion_FBgn0015239_ENCFF040KKO
ENCSR280XEB.Hr78.adult_whole-fly_insertion_FBgn0015239	ENCSR280XEB	Hr78	FBgn0015239	adult	whole-fly	NA	whole-fly,insertion	FALSE	FALSE	remap2022_ENCSR280XEB.Hr78.adult_whole-fly_insertion_FBgn0015239_ENCFF319IIP,remap2022_ENCSR280XEB.Hr78.adult_whole-fly_insertion_FBgn0015239_ENCFF040KKO
ENCSR281ORM.Sox102F.adult_whole-fly_site-specific-recombination_insertion_FBgn0039938	ENCSR281ORM	Sox102F	FBgn0039938	adult	whole-fly	NA	whole-fly,site-specific-recombination,insertion	FALSE	FALSE	remap2022_ENCSR281ORM.Sox102F.adult_whole-fly_site-specific-recombination_insertion_FBgn0039938_ENCFF976CHJ,remap2022_ENCSR281ORM.Sox102F.adult_whole-fly_site-specific-recombination_insertion_FBgn0039938_ENCFF718LKK
ENCSR281ORM.Sox102F.adult_whole-fly_site-specific-recombination_insertion_FBgn0039938	ENCSR281ORM	Sox102F	FBgn0039938	adult	whole-fly	NA	whole-fly,site-specific-recombination,insertion	FALSE	FALSE	remap2022_ENCSR281ORM.Sox102F.adult_whole-fly_site-specific-recombination_insertion_FBgn0039938_ENCFF976CHJ,remap2022_ENCSR281ORM.Sox102F.adult_whole-fly_site-specific-recombination_insertion_FBgn0039938_ENCFF718LKK
ENCSR283UXP.slp2.adult_whole-fly_site-specific-recombination_insertion_FBgn0004567	ENCSR283UXP	slp2	FBgn0004567	adult	whole-fly	NA	whole-fly,site-specific-recombination,insertion	FALSE	FALSE	remap2022_ENCSR283UXP.slp2.adult_whole-fly_site-specific-recombination_insertion_FBgn0004567_ENCFF910RRV,remap2022_ENCSR283UXP.slp2.adult_whole-fly_site-specific-recombination_insertion_FBgn0004567_ENCFF316GLJ
ENCSR283UXP.slp2.adult_whole-fly_site-specific-recombination_insertion_FBgn0004567	ENCSR283UXP	slp2	FBgn0004567	adult	whole-fly	NA	whole-fly,site-specific-recombination,insertion	FALSE	FALSE	remap2022_ENCSR283UXP.slp2.adult_whole-fly_site-specific-recombination_insertion_FBgn0004567_ENCFF910RRV,remap2022_ENCSR283UXP.slp2.adult_whole-fly_site-specific-recombination_insertion_FBgn0004567_ENCFF316GLJ
ENCSR287NIU.CG11617.adult_whole-fly_site-specific-recombination_insertion_FBgn0031232	ENCSR287NIU	CG11617	FBgn0031232	adult	whole-fly	NA	whole-fly,site-specific-recombination,insertion	FALSE	FALSE	remap2022_ENCSR287NIU.CG11617.adult_whole-fly_site-specific-recombination_insertion_FBgn0031232_ENCFF595XNL,remap2022_ENCSR287NIU.CG11617.adult_whole-fly_site-specific-recombination_insertion_FBgn0031232_ENCFF038SDS
ENCSR287NIU.CG11617.adult_whole-fly_site-specific-recombination_insertion_FBgn0031232	ENCSR287NIU	CG11617	FBgn0031232	adult	whole-fly	NA	whole-fly,site-specific-recombination,insertion	FALSE	FALSE	remap2022_ENCSR287NIU.CG11617.adult_whole-fly_site-specific-recombination_insertion_FBgn0031232_ENCFF595XNL,remap2022_ENCSR287NIU.CG11617.adult_whole-fly_site-specific-recombination_insertion_FBgn0031232_ENCFF038SDS
ENCSR288BZG.SREBP.adult_whole-fly_site-specific-recombination_insertion_FBgn0261283	ENCSR288BZG	SREBP	FBgn0261283	adult	whole-fly	NA	whole-fly,site-specific-recombination,insertion	FALSE	FALSE	remap2022_ENCSR288BZG.SREBP.adult_whole-fly_site-specific-recombination_insertion_FBgn0261283_ENCFF956ZVX,remap2022_ENCSR288BZG.SREBP.adult_whole-fly_site-specific-recombination_insertion_FBgn0261283_ENCFF632NOL,remap2022_ENCSR288BZG.SREBP.adult_whole-fly_site-specific-recombination_insertion_FBgn0261283_ENCFF552OXR
ENCSR288BZG.SREBP.adult_whole-fly_site-specific-recombination_insertion_FBgn0261283	ENCSR288BZG	SREBP	FBgn0261283	adult	whole-fly	NA	whole-fly,site-specific-recombination,insertion	FALSE	FALSE	remap2022_ENCSR288BZG.SREBP.adult_whole-fly_site-specific-recombination_insertion_FBgn0261283_ENCFF956ZVX,remap2022_ENCSR288BZG.SREBP.adult_whole-fly_site-specific-recombination_insertion_FBgn0261283_ENCFF632NOL,remap2022_ENCSR288BZG.SREBP.adult_whole-fly_site-specific-recombination_insertion_FBgn0261283_ENCFF552OXR
ENCSR288BZG.SREBP.adult_whole-fly_site-specific-recombination_insertion_FBgn0261283	ENCSR288BZG	SREBP	FBgn0261283	adult	whole-fly	NA	whole-fly,site-specific-recombination,insertion	FALSE	FALSE	remap2022_ENCSR288BZG.SREBP.adult_whole-fly_site-specific-recombination_insertion_FBgn0261283_ENCFF956ZVX,remap2022_ENCSR288BZG.SREBP.adult_whole-fly_site-specific-recombination_insertion_FBgn0261283_ENCFF632NOL,remap2022_ENCSR288BZG.SREBP.adult_whole-fly_site-specific-recombination_insertion_FBgn0261283_ENCFF552OXR
ENCSR290OJD.Stat92E.adult_whole-fly_insertion_FBgn0016917	ENCSR290OJD	Stat92E	FBgn0016917	adult	whole-fly	NA	whole-fly,insertion	FALSE	FALSE	remap2022_ENCSR290OJD.Stat92E.adult_whole-fly_insertion_FBgn0016917_ENCFF677DJI,remap2022_ENCSR290OJD.Stat92E.adult_whole-fly_insertion_FBgn0016917_ENCFF056WPO
ENCSR290OJD.Stat92E.adult_whole-fly_insertion_FBgn0016917	ENCSR290OJD	Stat92E	FBgn0016917	adult	whole-fly	NA	whole-fly,insertion	FALSE	FALSE	remap2022_ENCSR290OJD.Stat92E.adult_whole-fly_insertion_FBgn0016917_ENCFF677DJI,remap2022_ENCSR290OJD.Stat92E.adult_whole-fly_insertion_FBgn0016917_ENCFF056WPO
ENCSR291KUB.Rel.adult_whole-fly_site-specific-recombination_insertion_FBgn0014018	ENCSR291KUB	Rel	FBgn0014018	adult	whole-fly	NA	whole-fly,site-specific-recombination,insertion	FALSE	FALSE	remap2022_ENCSR291KUB.Rel.adult_whole-fly_site-specific-recombination_insertion_FBgn0014018_ENCFF658GCJ,remap2022_ENCSR291KUB.Rel.adult_whole-fly_site-specific-recombination_insertion_FBgn0014018_ENCFF608PMP
ENCSR291KUB.Rel.adult_whole-fly_site-specific-recombination_insertion_FBgn0014018	ENCSR291KUB	Rel	FBgn0014018	adult	whole-fly	NA	whole-fly,site-specific-recombination,insertion	FALSE	FALSE	remap2022_ENCSR291KUB.Rel.adult_whole-fly_site-specific-recombination_insertion_FBgn0014018_ENCFF658GCJ,remap2022_ENCSR291KUB.Rel.adult_whole-fly_site-specific-recombination_insertion_FBgn0014018_ENCFF608PMP
ENCSR291ZDB.CG4424.adult_whole-fly_site-specific-recombination_insertion_FBgn0038765	ENCSR291ZDB	CG4424	FBgn0038765	adult	whole-fly	NA	whole-fly,site-specific-recombination,insertion	FALSE	FALSE	remap2022_ENCSR291ZDB.CG4424.adult_whole-fly_site-specific-recombination_insertion_FBgn0038765_ENCFF990WQA,remap2022_ENCSR291ZDB.CG4424.adult_whole-fly_site-specific-recombination_insertion_FBgn0038765_ENCFF750UPQ,remap2022_ENCSR291ZDB.CG4424.adult_whole-fly_site-specific-recombination_insertion_FBgn0038765_ENCFF516TDC,remap2022_ENCSR291ZDB.CG4424.adult_whole-fly_site-specific-recombination_inser…
ENCSR291ZDB.CG4424.adult_whole-fly_site-specific-recombination_insertion_FBgn0038765	ENCSR291ZDB	CG4424	FBgn0038765	adult	whole-fly	NA	whole-fly,site-specific-recombination,insertion	FALSE	FALSE	remap2022_ENCSR291ZDB.CG4424.adult_whole-fly_site-specific-recombination_insertion_FBgn0038765_ENCFF990WQA,remap2022_ENCSR291ZDB.CG4424.adult_whole-fly_site-specific-recombination_insertion_FBgn0038765_ENCFF750UPQ,remap2022_ENCSR291ZDB.CG4424.adult_whole-fly_site-specific-recombination_insertion_FBgn0038765_ENCFF516TDC,remap2022_ENCSR291ZDB.CG4424.adult_whole-fly_site-specific-recombination_inser…
ENCSR291ZDB.CG4424.adult_whole-fly_site-specific-recombination_insertion_FBgn0038765	ENCSR291ZDB	CG4424	FBgn0038765	adult	whole-fly	NA	whole-fly,site-specific-recombination,insertion	FALSE	FALSE	remap2022_ENCSR291ZDB.CG4424.adult_whole-fly_site-specific-recombination_insertion_FBgn0038765_ENCFF990WQA,remap2022_ENCSR291ZDB.CG4424.adult_whole-fly_site-specific-recombination_insertion_FBgn0038765_ENCFF750UPQ,remap2022_ENCSR291ZDB.CG4424.adult_whole-fly_site-specific-recombination_insertion_FBgn0038765_ENCFF516TDC,remap2022_ENCSR291ZDB.CG4424.adult_whole-fly_site-specific-recombination_inser…
ENCSR291ZDB.CG4424.adult_whole-fly_site-specific-recombination_insertion_FBgn0038765	ENCSR291ZDB	CG4424	FBgn0038765	adult	whole-fly	NA	whole-fly,site-specific-recombination,insertion	FALSE	FALSE	remap2022_ENCSR291ZDB.CG4424.adult_whole-fly_site-specific-recombination_insertion_FBgn0038765_ENCFF990WQA,remap2022_ENCSR291ZDB.CG4424.adult_whole-fly_site-specific-recombination_insertion_FBgn0038765_ENCFF750UPQ,remap2022_ENCSR291ZDB.CG4424.adult_whole-fly_site-specific-recombination_insertion_FBgn0038765_ENCFF516TDC,remap2022_ENCSR291ZDB.CG4424.adult_whole-fly_site-specific-recombination_inser…
ENCSR291ZDB.CG4424.adult_whole-fly_site-specific-recombination_insertion_FBgn0038765	ENCSR291ZDB	CG4424	FBgn0038765	adult	whole-fly	NA	whole-fly,site-specific-recombination,insertion	FALSE	FALSE	remap2022_ENCSR291ZDB.CG4424.adult_whole-fly_site-specific-recombination_insertion_FBgn0038765_ENCFF990WQA,remap2022_ENCSR291ZDB.CG4424.adult_whole-fly_site-specific-recombination_insertion_FBgn0038765_ENCFF750UPQ,remap2022_ENCSR291ZDB.CG4424.adult_whole-fly_site-specific-recombination_insertion_FBgn0038765_ENCFF516TDC,remap2022_ENCSR291ZDB.CG4424.adult_whole-fly_site-specific-recombination_inser…
ENCSR291ZDB.CG4424.adult_whole-fly_site-specific-recombination_insertion_FBgn0038765	ENCSR291ZDB	CG4424	FBgn0038765	adult	whole-fly	NA	whole-fly,site-specific-recombination,insertion	FALSE	FALSE	remap2022_ENCSR291ZDB.CG4424.adult_whole-fly_site-specific-recombination_insertion_FBgn0038765_ENCFF990WQA,remap2022_ENCSR291ZDB.CG4424.adult_whole-fly_site-specific-recombination_insertion_FBgn0038765_ENCFF750UPQ,remap2022_ENCSR291ZDB.CG4424.adult_whole-fly_site-specific-recombination_insertion_FBgn0038765_ENCFF516TDC,remap2022_ENCSR291ZDB.CG4424.adult_whole-fly_site-specific-recombination_inser…
ENCSR292EYZ.lola.adult_whole-fly_site-specific-recombination_insertion_FBgn0283521	ENCSR292EYZ	lola	FBgn0283521	adult	whole-fly	NA	whole-fly,site-specific-recombination,insertion	FALSE	FALSE	remap2022_ENCSR292EYZ.lola.adult_whole-fly_site-specific-recombination_insertion_FBgn0283521_ENCFF932QPK,remap2022_ENCSR292EYZ.lola.adult_whole-fly_site-specific-recombination_insertion_FBgn0283521_ENCFF382UCF
ENCSR292EYZ.lola.adult_whole-fly_site-specific-recombination_insertion_FBgn0283521	ENCSR292EYZ	lola	FBgn0283521	adult	whole-fly	NA	whole-fly,site-specific-recombination,insertion	FALSE	FALSE	remap2022_ENCSR292EYZ.lola.adult_whole-fly_site-specific-recombination_insertion_FBgn0283521_ENCFF932QPK,remap2022_ENCSR292EYZ.lola.adult_whole-fly_site-specific-recombination_insertion_FBgn0283521_ENCFF382UCF
ENCSR292WNJ.Pfk.adult_whole-fly_site-specific-recombination_insertion_FBgn0003071	ENCSR292WNJ	Pfk	FBgn0003071	adult	whole-fly	NA	whole-fly,site-specific-recombination,insertion	FALSE	FALSE	remap2022_ENCSR292WNJ.Pfk.adult_whole-fly_site-specific-recombination_insertion_FBgn0003071_ENCFF912BIT,remap2022_ENCSR292WNJ.Pfk.adult_whole-fly_site-specific-recombination_insertion_FBgn0003071_ENCFF919UKD
ENCSR292WNJ.Pfk.adult_whole-fly_site-specific-recombination_insertion_FBgn0003071	ENCSR292WNJ	Pfk	FBgn0003071	adult	whole-fly	NA	whole-fly,site-specific-recombination,insertion	FALSE	FALSE	remap2022_ENCSR292WNJ.Pfk.adult_whole-fly_site-specific-recombination_insertion_FBgn0003071_ENCFF912BIT,remap2022_ENCSR292WNJ.Pfk.adult_whole-fly_site-specific-recombination_insertion_FBgn0003071_ENCFF919UKD
ENCSR295CRU.MESR4.adult_whole-fly_site-specific-recombination_insertion_FBgn0034240	ENCSR295CRU	MESR4	FBgn0034240	adult	whole-fly	NA	whole-fly,site-specific-recombination,insertion	FALSE	FALSE	remap2022_ENCSR295CRU.MESR4.adult_whole-fly_site-specific-recombination_insertion_FBgn0034240_ENCFF956MCO,remap2022_ENCSR295CRU.MESR4.adult_whole-fly_site-specific-recombination_insertion_FBgn0034240_ENCFF575BZI
ENCSR295CRU.MESR4.adult_whole-fly_site-specific-recombination_insertion_FBgn0034240	ENCSR295CRU	MESR4	FBgn0034240	adult	whole-fly	NA	whole-fly,site-specific-recombination,insertion	FALSE	FALSE	remap2022_ENCSR295CRU.MESR4.adult_whole-fly_site-specific-recombination_insertion_FBgn0034240_ENCFF956MCO,remap2022_ENCSR295CRU.MESR4.adult_whole-fly_site-specific-recombination_insertion_FBgn0034240_ENCFF575BZI
ENCSR295GRP.br.adult_whole-fly_site-specific-recombination_insertion_FBgn0283451	ENCSR295GRP	br	FBgn0283451	adult	whole-fly	NA	whole-fly,site-specific-recombination,insertion	FALSE	FALSE	remap2022_ENCSR295GRP.br.adult_whole-fly_site-specific-recombination_insertion_FBgn0283451_ENCFF184JOD,remap2022_ENCSR295GRP.br.adult_whole-fly_site-specific-recombination_insertion_FBgn0283451_ENCFF550QHK,remap2022_ENCSR295GRP.br.adult_whole-fly_site-specific-recombination_insertion_FBgn0283451_ENCFF141GAC
ENCSR295GRP.br.adult_whole-fly_site-specific-recombination_insertion_FBgn0283451	ENCSR295GRP	br	FBgn0283451	adult	whole-fly	NA	whole-fly,site-specific-recombination,insertion	FALSE	FALSE	remap2022_ENCSR295GRP.br.adult_whole-fly_site-specific-recombination_insertion_FBgn0283451_ENCFF184JOD,remap2022_ENCSR295GRP.br.adult_whole-fly_site-specific-recombination_insertion_FBgn0283451_ENCFF550QHK,remap2022_ENCSR295GRP.br.adult_whole-fly_site-specific-recombination_insertion_FBgn0283451_ENCFF141GAC
ENCSR295GRP.br.adult_whole-fly_site-specific-recombination_insertion_FBgn0283451	ENCSR295GRP	br	FBgn0283451	adult	whole-fly	NA	whole-fly,site-specific-recombination,insertion	FALSE	FALSE	remap2022_ENCSR295GRP.br.adult_whole-fly_site-specific-recombination_insertion_FBgn0283451_ENCFF184JOD,remap2022_ENCSR295GRP.br.adult_whole-fly_site-specific-recombination_insertion_FBgn0283451_ENCFF550QHK,remap2022_ENCSR295GRP.br.adult_whole-fly_site-specific-recombination_insertion_FBgn0283451_ENCFF141GAC
ENCSR295UVI.nom.adult_whole-fly_site-specific-recombination_insertion_FBgn0037617	ENCSR295UVI	nom	FBgn0037617	adult	whole-fly	NA	whole-fly,site-specific-recombination,insertion	FALSE	FALSE	remap2022_ENCSR295UVI.nom.adult_whole-fly_site-specific-recombination_insertion_FBgn0037617_ENCFF280VAE,remap2022_ENCSR295UVI.nom.adult_whole-fly_site-specific-recombination_insertion_FBgn0037617_ENCFF083KYB
ENCSR295UVI.nom.adult_whole-fly_site-specific-recombination_insertion_FBgn0037617	ENCSR295UVI	nom	FBgn0037617	adult	whole-fly	NA	whole-fly,site-specific-recombination,insertion	FALSE	FALSE	remap2022_ENCSR295UVI.nom.adult_whole-fly_site-specific-recombination_insertion_FBgn0037617_ENCFF280VAE,remap2022_ENCSR295UVI.nom.adult_whole-fly_site-specific-recombination_insertion_FBgn0037617_ENCFF083KYB
ENCSR296ASC.Neu2.adult_whole-fly_site-specific-recombination_insertion_FBgn0037085	ENCSR296ASC	Neu2	FBgn0037085	adult	whole-fly	NA	whole-fly,site-specific-recombination,insertion	FALSE	FALSE	remap2022_ENCSR296ASC.Neu2.adult_whole-fly_site-specific-recombination_insertion_FBgn0037085_ENCFF517HPG,remap2022_ENCSR296ASC.Neu2.adult_whole-fly_site-specific-recombination_insertion_FBgn0037085_ENCFF189STL,remap2022_ENCSR296ASC.Neu2.adult_whole-fly_site-specific-recombination_insertion_FBgn0037085_ENCFF487KQM
ENCSR296ASC.Neu2.adult_whole-fly_site-specific-recombination_insertion_FBgn0037085	ENCSR296ASC	Neu2	FBgn0037085	adult	whole-fly	NA	whole-fly,site-specific-recombination,insertion	FALSE	FALSE	remap2022_ENCSR296ASC.Neu2.adult_whole-fly_site-specific-recombination_insertion_FBgn0037085_ENCFF517HPG,remap2022_ENCSR296ASC.Neu2.adult_whole-fly_site-specific-recombination_insertion_FBgn0037085_ENCFF189STL,remap2022_ENCSR296ASC.Neu2.adult_whole-fly_site-specific-recombination_insertion_FBgn0037085_ENCFF487KQM
ENCSR296ASC.Neu2.adult_whole-fly_site-specific-recombination_insertion_FBgn0037085	ENCSR296ASC	Neu2	FBgn0037085	adult	whole-fly	NA	whole-fly,site-specific-recombination,insertion	FALSE	FALSE	remap2022_ENCSR296ASC.Neu2.adult_whole-fly_site-specific-recombination_insertion_FBgn0037085_ENCFF517HPG,remap2022_ENCSR296ASC.Neu2.adult_whole-fly_site-specific-recombination_insertion_FBgn0037085_ENCFF189STL,remap2022_ENCSR296ASC.Neu2.adult_whole-fly_site-specific-recombination_insertion_FBgn0037085_ENCFF487KQM
ENCSR296MRL.CG17385.adult_whole-fly_site-specific-recombination_insertion_FBgn0033934	ENCSR296MRL	CG17385	FBgn0033934	adult	whole-fly	NA	whole-fly,site-specific-recombination,insertion	FALSE	FALSE	remap2022_ENCSR296MRL.CG17385.adult_whole-fly_site-specific-recombination_insertion_FBgn0033934_ENCFF043TDN,remap2022_ENCSR296MRL.CG17385.adult_whole-fly_site-specific-recombination_insertion_FBgn0033934_ENCFF225XCT,remap2022_ENCSR296MRL.CG17385.adult_whole-fly_site-specific-recombination_insertion_FBgn0033934_ENCFF007RDH
ENCSR296MRL.CG17385.adult_whole-fly_site-specific-recombination_insertion_FBgn0033934	ENCSR296MRL	CG17385	FBgn0033934	adult	whole-fly	NA	whole-fly,site-specific-recombination,insertion	FALSE	FALSE	remap2022_ENCSR296MRL.CG17385.adult_whole-fly_site-specific-recombination_insertion_FBgn0033934_ENCFF043TDN,remap2022_ENCSR296MRL.CG17385.adult_whole-fly_site-specific-recombination_insertion_FBgn0033934_ENCFF225XCT,remap2022_ENCSR296MRL.CG17385.adult_whole-fly_site-specific-recombination_insertion_FBgn0033934_ENCFF007RDH
ENCSR296MRL.CG17385.adult_whole-fly_site-specific-recombination_insertion_FBgn0033934	ENCSR296MRL	CG17385	FBgn0033934	adult	whole-fly	NA	whole-fly,site-specific-recombination,insertion	FALSE	FALSE	remap2022_ENCSR296MRL.CG17385.adult_whole-fly_site-specific-recombination_insertion_FBgn0033934_ENCFF043TDN,remap2022_ENCSR296MRL.CG17385.adult_whole-fly_site-specific-recombination_insertion_FBgn0033934_ENCFF225XCT,remap2022_ENCSR296MRL.CG17385.adult_whole-fly_site-specific-recombination_insertion_FBgn0033934_ENCFF007RDH
ENCSR302AQS.CG4707.adult_whole-fly_site-specific-recombination_insertion_FBgn0035036	ENCSR302AQS	CG4707	FBgn0035036	adult	whole-fly	NA	whole-fly,site-specific-recombination,insertion	FALSE	FALSE	remap2022_ENCSR302AQS.CG4707.adult_whole-fly_site-specific-recombination_insertion_FBgn0035036_ENCFF082IEH,remap2022_ENCSR302AQS.CG4707.adult_whole-fly_site-specific-recombination_insertion_FBgn0035036_ENCFF817APD
ENCSR302AQS.CG4707.adult_whole-fly_site-specific-recombination_insertion_FBgn0035036	ENCSR302AQS	CG4707	FBgn0035036	adult	whole-fly	NA	whole-fly,site-specific-recombination,insertion	FALSE	FALSE	remap2022_ENCSR302AQS.CG4707.adult_whole-fly_site-specific-recombination_insertion_FBgn0035036_ENCFF082IEH,remap2022_ENCSR302AQS.CG4707.adult_whole-fly_site-specific-recombination_insertion_FBgn0035036_ENCFF817APD
ENCSR303EBD.Lpt.adult_whole-fly_site-specific-recombination_insertion_FBgn0263667	ENCSR303EBD	Lpt	FBgn0263667	adult	whole-fly	NA	whole-fly,site-specific-recombination,insertion	FALSE	FALSE	remap2022_ENCSR303EBD.Lpt.adult_whole-fly_site-specific-recombination_insertion_FBgn0263667_ENCFF947PBK,remap2022_ENCSR303EBD.Lpt.adult_whole-fly_site-specific-recombination_insertion_FBgn0263667_ENCFF281FXT,remap2022_ENCSR303EBD.Lpt.adult_whole-fly_site-specific-recombination_insertion_FBgn0263667_ENCFF919DVE
ENCSR303EBD.Lpt.adult_whole-fly_site-specific-recombination_insertion_FBgn0263667	ENCSR303EBD	Lpt	FBgn0263667	adult	whole-fly	NA	whole-fly,site-specific-recombination,insertion	FALSE	FALSE	remap2022_ENCSR303EBD.Lpt.adult_whole-fly_site-specific-recombination_insertion_FBgn0263667_ENCFF947PBK,remap2022_ENCSR303EBD.Lpt.adult_whole-fly_site-specific-recombination_insertion_FBgn0263667_ENCFF281FXT,remap2022_ENCSR303EBD.Lpt.adult_whole-fly_site-specific-recombination_insertion_FBgn0263667_ENCFF919DVE
ENCSR303EBD.Lpt.adult_whole-fly_site-specific-recombination_insertion_FBgn0263667	ENCSR303EBD	Lpt	FBgn0263667	adult	whole-fly	NA	whole-fly,site-specific-recombination,insertion	FALSE	FALSE	remap2022_ENCSR303EBD.Lpt.adult_whole-fly_site-specific-recombination_insertion_FBgn0263667_ENCFF947PBK,remap2022_ENCSR303EBD.Lpt.adult_whole-fly_site-specific-recombination_insertion_FBgn0263667_ENCFF281FXT,remap2022_ENCSR303EBD.Lpt.adult_whole-fly_site-specific-recombination_insertion_FBgn0263667_ENCFF919DVE
ENCSR303MJE.usp.adult_whole-fly_insertion_FBgn0003964	ENCSR303MJE	usp	FBgn0003964	adult	whole-fly	NA	whole-fly,insertion	FALSE	FALSE	remap2022_ENCSR303MJE.usp.adult_whole-fly_insertion_FBgn0003964_ENCFF261FOL,remap2022_ENCSR303MJE.usp.adult_whole-fly_insertion_FBgn0003964_ENCFF220DAK
ENCSR303MJE.usp.adult_whole-fly_insertion_FBgn0003964	ENCSR303MJE	usp	FBgn0003964	adult	whole-fly	NA	whole-fly,insertion	FALSE	FALSE	remap2022_ENCSR303MJE.usp.adult_whole-fly_insertion_FBgn0003964_ENCFF261FOL,remap2022_ENCSR303MJE.usp.adult_whole-fly_insertion_FBgn0003964_ENCFF220DAK
ENCSR308HCJ.Smox.adult_whole-fly_site-specific-recombination_insertion_FBgn0025800	ENCSR308HCJ	Smox	FBgn0025800	adult	whole-fly	NA	whole-fly,site-specific-recombination,insertion	FALSE	FALSE	remap2022_ENCSR308HCJ.Smox.adult_whole-fly_site-specific-recombination_insertion_FBgn0025800_ENCFF154FXL,remap2022_ENCSR308HCJ.Smox.adult_whole-fly_site-specific-recombination_insertion_FBgn0025800_ENCFF233MSS,remap2022_ENCSR308HCJ.Smox.adult_whole-fly_site-specific-recombination_insertion_FBgn0025800_ENCFF220PSN
ENCSR308HCJ.Smox.adult_whole-fly_site-specific-recombination_insertion_FBgn0025800	ENCSR308HCJ	Smox	FBgn0025800	adult	whole-fly	NA	whole-fly,site-specific-recombination,insertion	FALSE	FALSE	remap2022_ENCSR308HCJ.Smox.adult_whole-fly_site-specific-recombination_insertion_FBgn0025800_ENCFF154FXL,remap2022_ENCSR308HCJ.Smox.adult_whole-fly_site-specific-recombination_insertion_FBgn0025800_ENCFF233MSS,remap2022_ENCSR308HCJ.Smox.adult_whole-fly_site-specific-recombination_insertion_FBgn0025800_ENCFF220PSN
ENCSR308HCJ.Smox.adult_whole-fly_site-specific-recombination_insertion_FBgn0025800	ENCSR308HCJ	Smox	FBgn0025800	adult	whole-fly	NA	whole-fly,site-specific-recombination,insertion	FALSE	FALSE	remap2022_ENCSR308HCJ.Smox.adult_whole-fly_site-specific-recombination_insertion_FBgn0025800_ENCFF154FXL,remap2022_ENCSR308HCJ.Smox.adult_whole-fly_site-specific-recombination_insertion_FBgn0025800_ENCFF233MSS,remap2022_ENCSR308HCJ.Smox.adult_whole-fly_site-specific-recombination_insertion_FBgn0025800_ENCFF220PSN
ENCSR310ZJI.bsh.adult_whole-fly_site-specific-recombination_insertion_FBgn0000529	ENCSR310ZJI	bsh	FBgn0000529	adult	whole-fly	NA	whole-fly,site-specific-recombination,insertion	FALSE	FALSE	remap2022_ENCSR310ZJI.bsh.adult_whole-fly_site-specific-recombination_insertion_FBgn0000529_ENCFF540GOQ,remap2022_ENCSR310ZJI.bsh.adult_whole-fly_site-specific-recombination_insertion_FBgn0000529_ENCFF623YUH
ENCSR310ZJI.bsh.adult_whole-fly_site-specific-recombination_insertion_FBgn0000529	ENCSR310ZJI	bsh	FBgn0000529	adult	whole-fly	NA	whole-fly,site-specific-recombination,insertion	FALSE	FALSE	remap2022_ENCSR310ZJI.bsh.adult_whole-fly_site-specific-recombination_insertion_FBgn0000529_ENCFF540GOQ,remap2022_ENCSR310ZJI.bsh.adult_whole-fly_site-specific-recombination_insertion_FBgn0000529_ENCFF623YUH
ENCSR312RCJ.spab.adult_whole-fly_site-specific-recombination_insertion_FBgn0033358	ENCSR312RCJ	spab	FBgn0033358	adult	whole-fly	NA	whole-fly,site-specific-recombination,insertion	FALSE	FALSE	remap2022_ENCSR312RCJ.spab.adult_whole-fly_site-specific-recombination_insertion_FBgn0033358_ENCFF660QHJ,remap2022_ENCSR312RCJ.spab.adult_whole-fly_site-specific-recombination_insertion_FBgn0033358_ENCFF600KOH
ENCSR312RCJ.spab.adult_whole-fly_site-specific-recombination_insertion_FBgn0033358	ENCSR312RCJ	spab	FBgn0033358	adult	whole-fly	NA	whole-fly,site-specific-recombination,insertion	FALSE	FALSE	remap2022_ENCSR312RCJ.spab.adult_whole-fly_site-specific-recombination_insertion_FBgn0033358_ENCFF660QHJ,remap2022_ENCSR312RCJ.spab.adult_whole-fly_site-specific-recombination_insertion_FBgn0033358_ENCFF600KOH
ENCSR313RIH.CG10654.adult_whole-fly_site-specific-recombination_insertion_FBgn0036294	ENCSR313RIH	CG10654	FBgn0036294	adult	whole-fly	NA	whole-fly,site-specific-recombination,insertion	FALSE	FALSE	remap2022_ENCSR313RIH.CG10654.adult_whole-fly_site-specific-recombination_insertion_FBgn0036294_ENCFF971UBM,remap2022_ENCSR313RIH.CG10654.adult_whole-fly_site-specific-recombination_insertion_FBgn0036294_ENCFF587RKV
ENCSR313RIH.CG10654.adult_whole-fly_site-specific-recombination_insertion_FBgn0036294	ENCSR313RIH	CG10654	FBgn0036294	adult	whole-fly	NA	whole-fly,site-specific-recombination,insertion	FALSE	FALSE	remap2022_ENCSR313RIH.CG10654.adult_whole-fly_site-specific-recombination_insertion_FBgn0036294_ENCFF971UBM,remap2022_ENCSR313RIH.CG10654.adult_whole-fly_site-specific-recombination_insertion_FBgn0036294_ENCFF587RKV
ENCSR313TWF.CG31365.adult_whole-fly_site-specific-recombination_insertion_FBgn0051365	ENCSR313TWF	CG31365	FBgn0051365	adult	whole-fly	NA	whole-fly,site-specific-recombination,insertion	FALSE	FALSE	remap2022_ENCSR313TWF.CG31365.adult_whole-fly_site-specific-recombination_insertion_FBgn0051365_ENCFF878MDT,remap2022_ENCSR313TWF.CG31365.adult_whole-fly_site-specific-recombination_insertion_FBgn0051365_ENCFF292GTG
ENCSR313TWF.CG31365.adult_whole-fly_site-specific-recombination_insertion_FBgn0051365	ENCSR313TWF	CG31365	FBgn0051365	adult	whole-fly	NA	whole-fly,site-specific-recombination,insertion	FALSE	FALSE	remap2022_ENCSR313TWF.CG31365.adult_whole-fly_site-specific-recombination_insertion_FBgn0051365_ENCFF878MDT,remap2022_ENCSR313TWF.CG31365.adult_whole-fly_site-specific-recombination_insertion_FBgn0051365_ENCFF292GTG
ENCSR315AML.Hand.adult_whole-fly_site-specific-recombination_insertion_FBgn0032209	ENCSR315AML	Hand	FBgn0032209	adult	whole-fly	NA	whole-fly,site-specific-recombination,insertion	FALSE	FALSE	remap2022_ENCSR315AML.Hand.adult_whole-fly_site-specific-recombination_insertion_FBgn0032209_ENCFF163EIQ,remap2022_ENCSR315AML.Hand.adult_whole-fly_site-specific-recombination_insertion_FBgn0032209_ENCFF902SPU
ENCSR315AML.Hand.adult_whole-fly_site-specific-recombination_insertion_FBgn0032209	ENCSR315AML	Hand	FBgn0032209	adult	whole-fly	NA	whole-fly,site-specific-recombination,insertion	FALSE	FALSE	remap2022_ENCSR315AML.Hand.adult_whole-fly_site-specific-recombination_insertion_FBgn0032209_ENCFF163EIQ,remap2022_ENCSR315AML.Hand.adult_whole-fly_site-specific-recombination_insertion_FBgn0032209_ENCFF902SPU
ENCSR316FKJ.wek.adult_whole-fly_site-specific-recombination_insertion_FBgn0001990	ENCSR316FKJ	wek	FBgn0001990	adult	whole-fly	NA	whole-fly,site-specific-recombination,insertion	FALSE	FALSE	remap2022_ENCSR316FKJ.wek.adult_whole-fly_site-specific-recombination_insertion_FBgn0001990_ENCFF398VOR,remap2022_ENCSR316FKJ.wek.adult_whole-fly_site-specific-recombination_insertion_FBgn0001990_ENCFF772GRI,remap2022_ENCSR316FKJ.wek.adult_whole-fly_site-specific-recombination_insertion_FBgn0001990_ENCFF729FIS
ENCSR316FKJ.wek.adult_whole-fly_site-specific-recombination_insertion_FBgn0001990	ENCSR316FKJ	wek	FBgn0001990	adult	whole-fly	NA	whole-fly,site-specific-recombination,insertion	FALSE	FALSE	remap2022_ENCSR316FKJ.wek.adult_whole-fly_site-specific-recombination_insertion_FBgn0001990_ENCFF398VOR,remap2022_ENCSR316FKJ.wek.adult_whole-fly_site-specific-recombination_insertion_FBgn0001990_ENCFF772GRI,remap2022_ENCSR316FKJ.wek.adult_whole-fly_site-specific-recombination_insertion_FBgn0001990_ENCFF729FIS
ENCSR316FKJ.wek.adult_whole-fly_site-specific-recombination_insertion_FBgn0001990	ENCSR316FKJ	wek	FBgn0001990	adult	whole-fly	NA	whole-fly,site-specific-recombination,insertion	FALSE	FALSE	remap2022_ENCSR316FKJ.wek.adult_whole-fly_site-specific-recombination_insertion_FBgn0001990_ENCFF398VOR,remap2022_ENCSR316FKJ.wek.adult_whole-fly_site-specific-recombination_insertion_FBgn0001990_ENCFF772GRI,remap2022_ENCSR316FKJ.wek.adult_whole-fly_site-specific-recombination_insertion_FBgn0001990_ENCFF729FIS
ENCSR317SVS.acj6.adult_whole-fly_site-specific-recombination_insertion_FBgn0000028	ENCSR317SVS	acj6	FBgn0000028	adult	whole-fly	NA	whole-fly,site-specific-recombination,insertion	FALSE	FALSE	remap2022_ENCSR317SVS.acj6.adult_whole-fly_site-specific-recombination_insertion_FBgn0000028_ENCFF616VVC,remap2022_ENCSR317SVS.acj6.adult_whole-fly_site-specific-recombination_insertion_FBgn0000028_ENCFF842JQB,remap2022_ENCSR317SVS.acj6.adult_whole-fly_site-specific-recombination_insertion_FBgn0000028_ENCFF652VIU
ENCSR317SVS.acj6.adult_whole-fly_site-specific-recombination_insertion_FBgn0000028	ENCSR317SVS	acj6	FBgn0000028	adult	whole-fly	NA	whole-fly,site-specific-recombination,insertion	FALSE	FALSE	remap2022_ENCSR317SVS.acj6.adult_whole-fly_site-specific-recombination_insertion_FBgn0000028_ENCFF616VVC,remap2022_ENCSR317SVS.acj6.adult_whole-fly_site-specific-recombination_insertion_FBgn0000028_ENCFF842JQB,remap2022_ENCSR317SVS.acj6.adult_whole-fly_site-specific-recombination_insertion_FBgn0000028_ENCFF652VIU
ENCSR317SVS.acj6.adult_whole-fly_site-specific-recombination_insertion_FBgn0000028	ENCSR317SVS	acj6	FBgn0000028	adult	whole-fly	NA	whole-fly,site-specific-recombination,insertion	FALSE	FALSE	remap2022_ENCSR317SVS.acj6.adult_whole-fly_site-specific-recombination_insertion_FBgn0000028_ENCFF616VVC,remap2022_ENCSR317SVS.acj6.adult_whole-fly_site-specific-recombination_insertion_FBgn0000028_ENCFF842JQB,remap2022_ENCSR317SVS.acj6.adult_whole-fly_site-specific-recombination_insertion_FBgn0000028_ENCFF652VIU
ENCSR317XOG.CG30020.adult_whole-fly_site-specific-recombination_insertion_FBgn0050020	ENCSR317XOG	CG30020	FBgn0050020	adult	whole-fly	NA	whole-fly,site-specific-recombination,insertion	FALSE	FALSE	remap2022_ENCSR317XOG.CG30020.adult_whole-fly_site-specific-recombination_insertion_FBgn0050020_ENCFF463BNL,remap2022_ENCSR317XOG.CG30020.adult_whole-fly_site-specific-recombination_insertion_FBgn0050020_ENCFF034KCB
ENCSR317XOG.CG30020.adult_whole-fly_site-specific-recombination_insertion_FBgn0050020	ENCSR317XOG	CG30020	FBgn0050020	adult	whole-fly	NA	whole-fly,site-specific-recombination,insertion	FALSE	FALSE	remap2022_ENCSR317XOG.CG30020.adult_whole-fly_site-specific-recombination_insertion_FBgn0050020_ENCFF463BNL,remap2022_ENCSR317XOG.CG30020.adult_whole-fly_site-specific-recombination_insertion_FBgn0050020_ENCFF034KCB
ENCSR319MRG.D.adult_whole-fly_FBgn0000411	ENCSR319MRG	D	FBgn0000411	adult	whole-fly	NA	whole-fly	FALSE	FALSE	remap2022_ENCSR319MRG.D.adult_whole-fly_FBgn0000411_ENCFF849MTC,remap2022_ENCSR319MRG.D.adult_whole-fly_FBgn0000411_ENCFF468LYR
ENCSR319MRG.D.adult_whole-fly_FBgn0000411	ENCSR319MRG	D	FBgn0000411	adult	whole-fly	NA	whole-fly	FALSE	FALSE	remap2022_ENCSR319MRG.D.adult_whole-fly_FBgn0000411_ENCFF849MTC,remap2022_ENCSR319MRG.D.adult_whole-fly_FBgn0000411_ENCFF468LYR
ENCSR321YHE.CG1233.adult_whole-fly_site-specific-recombination_insertion_FBgn0035137	ENCSR321YHE	CG1233	FBgn0035137	adult	whole-fly	NA	whole-fly,site-specific-recombination,insertion	FALSE	FALSE	remap2022_ENCSR321YHE.CG1233.adult_whole-fly_site-specific-recombination_insertion_FBgn0035137_ENCFF973OYR,remap2022_ENCSR321YHE.CG1233.adult_whole-fly_site-specific-recombination_insertion_FBgn0035137_ENCFF038BXI,remap2022_ENCSR321YHE.CG1233.adult_whole-fly_site-specific-recombination_insertion_FBgn0035137_ENCFF742ETL,remap2022_ENCSR321YHE.CG1233.adult_whole-fly_site-specific-recombination_inser…
ENCSR321YHE.CG1233.adult_whole-fly_site-specific-recombination_insertion_FBgn0035137	ENCSR321YHE	CG1233	FBgn0035137	adult	whole-fly	NA	whole-fly,site-specific-recombination,insertion	FALSE	FALSE	remap2022_ENCSR321YHE.CG1233.adult_whole-fly_site-specific-recombination_insertion_FBgn0035137_ENCFF973OYR,remap2022_ENCSR321YHE.CG1233.adult_whole-fly_site-specific-recombination_insertion_FBgn0035137_ENCFF038BXI,remap2022_ENCSR321YHE.CG1233.adult_whole-fly_site-specific-recombination_insertion_FBgn0035137_ENCFF742ETL,remap2022_ENCSR321YHE.CG1233.adult_whole-fly_site-specific-recombination_inser…
ENCSR321YHE.CG1233.adult_whole-fly_site-specific-recombination_insertion_FBgn0035137	ENCSR321YHE	CG1233	FBgn0035137	adult	whole-fly	NA	whole-fly,site-specific-recombination,insertion	FALSE	FALSE	remap2022_ENCSR321YHE.CG1233.adult_whole-fly_site-specific-recombination_insertion_FBgn0035137_ENCFF973OYR,remap2022_ENCSR321YHE.CG1233.adult_whole-fly_site-specific-recombination_insertion_FBgn0035137_ENCFF038BXI,remap2022_ENCSR321YHE.CG1233.adult_whole-fly_site-specific-recombination_insertion_FBgn0035137_ENCFF742ETL,remap2022_ENCSR321YHE.CG1233.adult_whole-fly_site-specific-recombination_inser…
ENCSR321YHE.CG1233.adult_whole-fly_site-specific-recombination_insertion_FBgn0035137	ENCSR321YHE	CG1233	FBgn0035137	adult	whole-fly	NA	whole-fly,site-specific-recombination,insertion	FALSE	FALSE	remap2022_ENCSR321YHE.CG1233.adult_whole-fly_site-specific-recombination_insertion_FBgn0035137_ENCFF973OYR,remap2022_ENCSR321YHE.CG1233.adult_whole-fly_site-specific-recombination_insertion_FBgn0035137_ENCFF038BXI,remap2022_ENCSR321YHE.CG1233.adult_whole-fly_site-specific-recombination_insertion_FBgn0035137_ENCFF742ETL,remap2022_ENCSR321YHE.CG1233.adult_whole-fly_site-specific-recombination_inser…
ENCSR324QVN.Hmr.adult_whole-fly_site-specific-recombination_insertion_FBgn0001206	ENCSR324QVN	Hmr	FBgn0001206	adult	whole-fly	NA	whole-fly,site-specific-recombination,insertion	FALSE	FALSE	remap2022_ENCSR324QVN.Hmr.adult_whole-fly_site-specific-recombination_insertion_FBgn0001206_ENCFF582NYN,remap2022_ENCSR324QVN.Hmr.adult_whole-fly_site-specific-recombination_insertion_FBgn0001206_ENCFF253UZL,remap2022_ENCSR324QVN.Hmr.adult_whole-fly_site-specific-recombination_insertion_FBgn0001206_ENCFF671KYR
ENCSR324QVN.Hmr.adult_whole-fly_site-specific-recombination_insertion_FBgn0001206	ENCSR324QVN	Hmr	FBgn0001206	adult	whole-fly	NA	whole-fly,site-specific-recombination,insertion	FALSE	FALSE	remap2022_ENCSR324QVN.Hmr.adult_whole-fly_site-specific-recombination_insertion_FBgn0001206_ENCFF582NYN,remap2022_ENCSR324QVN.Hmr.adult_whole-fly_site-specific-recombination_insertion_FBgn0001206_ENCFF253UZL,remap2022_ENCSR324QVN.Hmr.adult_whole-fly_site-specific-recombination_insertion_FBgn0001206_ENCFF671KYR
ENCSR324QVN.Hmr.adult_whole-fly_site-specific-recombination_insertion_FBgn0001206	ENCSR324QVN	Hmr	FBgn0001206	adult	whole-fly	NA	whole-fly,site-specific-recombination,insertion	FALSE	FALSE	remap2022_ENCSR324QVN.Hmr.adult_whole-fly_site-specific-recombination_insertion_FBgn0001206_ENCFF582NYN,remap2022_ENCSR324QVN.Hmr.adult_whole-fly_site-specific-recombination_insertion_FBgn0001206_ENCFF253UZL,remap2022_ENCSR324QVN.Hmr.adult_whole-fly_site-specific-recombination_insertion_FBgn0001206_ENCFF671KYR
ENCSR325UBZ.Su-H.adult_whole-fly_site-specific-recombination_insertion_FBgn0004837	ENCSR325UBZ	Su-H	FBgn0004837	adult	whole-fly	NA	whole-fly,site-specific-recombination,insertion	FALSE	FALSE	remap2022_ENCSR325UBZ.Su-H.adult_whole-fly_site-specific-recombination_insertion_FBgn0004837_ENCFF496MCN,remap2022_ENCSR325UBZ.Su-H.adult_whole-fly_site-specific-recombination_insertion_FBgn0004837_ENCFF120SFB,remap2022_ENCSR325UBZ.Su-H.adult_whole-fly_site-specific-recombination_insertion_FBgn0004837_ENCFF496CEF
ENCSR325UBZ.Su-H.adult_whole-fly_site-specific-recombination_insertion_FBgn0004837	ENCSR325UBZ	Su-H	FBgn0004837	adult	whole-fly	NA	whole-fly,site-specific-recombination,insertion	FALSE	FALSE	remap2022_ENCSR325UBZ.Su-H.adult_whole-fly_site-specific-recombination_insertion_FBgn0004837_ENCFF496MCN,remap2022_ENCSR325UBZ.Su-H.adult_whole-fly_site-specific-recombination_insertion_FBgn0004837_ENCFF120SFB,remap2022_ENCSR325UBZ.Su-H.adult_whole-fly_site-specific-recombination_insertion_FBgn0004837_ENCFF496CEF
ENCSR325UBZ.Su-H.adult_whole-fly_site-specific-recombination_insertion_FBgn0004837	ENCSR325UBZ	Su-H	FBgn0004837	adult	whole-fly	NA	whole-fly,site-specific-recombination,insertion	FALSE	FALSE	remap2022_ENCSR325UBZ.Su-H.adult_whole-fly_site-specific-recombination_insertion_FBgn0004837_ENCFF496MCN,remap2022_ENCSR325UBZ.Su-H.adult_whole-fly_site-specific-recombination_insertion_FBgn0004837_ENCFF120SFB,remap2022_ENCSR325UBZ.Su-H.adult_whole-fly_site-specific-recombination_insertion_FBgn0004837_ENCFF496CEF
ENCSR327ZQL.CG18599.adult_whole-fly_site-specific-recombination_insertion_FBgn0038592	ENCSR327ZQL	CG18599	FBgn0038592	adult	whole-fly	NA	whole-fly,site-specific-recombination,insertion	FALSE	FALSE	remap2022_ENCSR327ZQL.CG18599.adult_whole-fly_site-specific-recombination_insertion_FBgn0038592_ENCFF563GHA,remap2022_ENCSR327ZQL.CG18599.adult_whole-fly_site-specific-recombination_insertion_FBgn0038592_ENCFF871LAP,remap2022_ENCSR327ZQL.CG18599.adult_whole-fly_site-specific-recombination_insertion_FBgn0038592_ENCFF274JPO
ENCSR327ZQL.CG18599.adult_whole-fly_site-specific-recombination_insertion_FBgn0038592	ENCSR327ZQL	CG18599	FBgn0038592	adult	whole-fly	NA	whole-fly,site-specific-recombination,insertion	FALSE	FALSE	remap2022_ENCSR327ZQL.CG18599.adult_whole-fly_site-specific-recombination_insertion_FBgn0038592_ENCFF563GHA,remap2022_ENCSR327ZQL.CG18599.adult_whole-fly_site-specific-recombination_insertion_FBgn0038592_ENCFF871LAP,remap2022_ENCSR327ZQL.CG18599.adult_whole-fly_site-specific-recombination_insertion_FBgn0038592_ENCFF274JPO
ENCSR327ZQL.CG18599.adult_whole-fly_site-specific-recombination_insertion_FBgn0038592	ENCSR327ZQL	CG18599	FBgn0038592	adult	whole-fly	NA	whole-fly,site-specific-recombination,insertion	FALSE	FALSE	remap2022_ENCSR327ZQL.CG18599.adult_whole-fly_site-specific-recombination_insertion_FBgn0038592_ENCFF563GHA,remap2022_ENCSR327ZQL.CG18599.adult_whole-fly_site-specific-recombination_insertion_FBgn0038592_ENCFF871LAP,remap2022_ENCSR327ZQL.CG18599.adult_whole-fly_site-specific-recombination_insertion_FBgn0038592_ENCFF274JPO
ENCSR332BCD.pita.adult_whole-fly_site-specific-recombination_insertion_FBgn0034878	ENCSR332BCD	pita	FBgn0034878	adult	whole-fly	NA	whole-fly,site-specific-recombination,insertion	FALSE	FALSE	remap2022_ENCSR332BCD.pita.adult_whole-fly_site-specific-recombination_insertion_FBgn0034878_ENCFF147AIV,remap2022_ENCSR332BCD.pita.adult_whole-fly_site-specific-recombination_insertion_FBgn0034878_ENCFF466AYB
ENCSR332BCD.pita.adult_whole-fly_site-specific-recombination_insertion_FBgn0034878	ENCSR332BCD	pita	FBgn0034878	adult	whole-fly	NA	whole-fly,site-specific-recombination,insertion	FALSE	FALSE	remap2022_ENCSR332BCD.pita.adult_whole-fly_site-specific-recombination_insertion_FBgn0034878_ENCFF147AIV,remap2022_ENCSR332BCD.pita.adult_whole-fly_site-specific-recombination_insertion_FBgn0034878_ENCFF466AYB
ENCSR332DSH.Plzf.adult_whole-fly_site-specific-recombination_insertion_FBgn0032401	ENCSR332DSH	Plzf	FBgn0032401	adult	whole-fly	NA	whole-fly,site-specific-recombination,insertion	FALSE	FALSE	remap2022_ENCSR332DSH.Plzf.adult_whole-fly_site-specific-recombination_insertion_FBgn0032401_ENCFF421DGH,remap2022_ENCSR332DSH.Plzf.adult_whole-fly_site-specific-recombination_insertion_FBgn0032401_ENCFF318BSX,remap2022_ENCSR332DSH.Plzf.adult_whole-fly_site-specific-recombination_insertion_FBgn0032401_ENCFF725BCX,remap2022_ENCSR332DSH.Plzf.adult_whole-fly_site-specific-recombination_insertion_FBg…
ENCSR332DSH.Plzf.adult_whole-fly_site-specific-recombination_insertion_FBgn0032401	ENCSR332DSH	Plzf	FBgn0032401	adult	whole-fly	NA	whole-fly,site-specific-recombination,insertion	FALSE	FALSE	remap2022_ENCSR332DSH.Plzf.adult_whole-fly_site-specific-recombination_insertion_FBgn0032401_ENCFF421DGH,remap2022_ENCSR332DSH.Plzf.adult_whole-fly_site-specific-recombination_insertion_FBgn0032401_ENCFF318BSX,remap2022_ENCSR332DSH.Plzf.adult_whole-fly_site-specific-recombination_insertion_FBgn0032401_ENCFF725BCX,remap2022_ENCSR332DSH.Plzf.adult_whole-fly_site-specific-recombination_insertion_FBg…
ENCSR332DSH.Plzf.adult_whole-fly_site-specific-recombination_insertion_FBgn0032401	ENCSR332DSH	Plzf	FBgn0032401	adult	whole-fly	NA	whole-fly,site-specific-recombination,insertion	FALSE	FALSE	remap2022_ENCSR332DSH.Plzf.adult_whole-fly_site-specific-recombination_insertion_FBgn0032401_ENCFF421DGH,remap2022_ENCSR332DSH.Plzf.adult_whole-fly_site-specific-recombination_insertion_FBgn0032401_ENCFF318BSX,remap2022_ENCSR332DSH.Plzf.adult_whole-fly_site-specific-recombination_insertion_FBgn0032401_ENCFF725BCX,remap2022_ENCSR332DSH.Plzf.adult_whole-fly_site-specific-recombination_insertion_FBg…
ENCSR332DSH.Plzf.adult_whole-fly_site-specific-recombination_insertion_FBgn0032401	ENCSR332DSH	Plzf	FBgn0032401	adult	whole-fly	NA	whole-fly,site-specific-recombination,insertion	FALSE	FALSE	remap2022_ENCSR332DSH.Plzf.adult_whole-fly_site-specific-recombination_insertion_FBgn0032401_ENCFF421DGH,remap2022_ENCSR332DSH.Plzf.adult_whole-fly_site-specific-recombination_insertion_FBgn0032401_ENCFF318BSX,remap2022_ENCSR332DSH.Plzf.adult_whole-fly_site-specific-recombination_insertion_FBgn0032401_ENCFF725BCX,remap2022_ENCSR332DSH.Plzf.adult_whole-fly_site-specific-recombination_insertion_FBg…
ENCSR335NNR.nerfin-1.adult_whole-fly_site-specific-recombination_insertion_FBgn0028999	ENCSR335NNR	nerfin-1	FBgn0028999	adult	whole-fly	NA	whole-fly,site-specific-recombination,insertion	FALSE	FALSE	remap2022_ENCSR335NNR.nerfin-1.adult_whole-fly_site-specific-recombination_insertion_FBgn0028999_ENCFF358JIV,remap2022_ENCSR335NNR.nerfin-1.adult_whole-fly_site-specific-recombination_insertion_FBgn0028999_ENCFF063KAP,remap2022_ENCSR335NNR.nerfin-1.adult_whole-fly_site-specific-recombination_insertion_FBgn0028999_ENCFF023PNW
ENCSR335NNR.nerfin-1.adult_whole-fly_site-specific-recombination_insertion_FBgn0028999	ENCSR335NNR	nerfin-1	FBgn0028999	adult	whole-fly	NA	whole-fly,site-specific-recombination,insertion	FALSE	FALSE	remap2022_ENCSR335NNR.nerfin-1.adult_whole-fly_site-specific-recombination_insertion_FBgn0028999_ENCFF358JIV,remap2022_ENCSR335NNR.nerfin-1.adult_whole-fly_site-specific-recombination_insertion_FBgn0028999_ENCFF063KAP,remap2022_ENCSR335NNR.nerfin-1.adult_whole-fly_site-specific-recombination_insertion_FBgn0028999_ENCFF023PNW
ENCSR335NNR.nerfin-1.adult_whole-fly_site-specific-recombination_insertion_FBgn0028999	ENCSR335NNR	nerfin-1	FBgn0028999	adult	whole-fly	NA	whole-fly,site-specific-recombination,insertion	FALSE	FALSE	remap2022_ENCSR335NNR.nerfin-1.adult_whole-fly_site-specific-recombination_insertion_FBgn0028999_ENCFF358JIV,remap2022_ENCSR335NNR.nerfin-1.adult_whole-fly_site-specific-recombination_insertion_FBgn0028999_ENCFF063KAP,remap2022_ENCSR335NNR.nerfin-1.adult_whole-fly_site-specific-recombination_insertion_FBgn0028999_ENCFF023PNW
ENCSR335QAE.svp.adult_whole-fly_site-specific-recombination_insertion_FBgn0003651	ENCSR335QAE	svp	FBgn0003651	adult	whole-fly	NA	whole-fly,site-specific-recombination,insertion	FALSE	FALSE	remap2022_ENCSR335QAE.svp.adult_whole-fly_site-specific-recombination_insertion_FBgn0003651_ENCFF697LJK,remap2022_ENCSR335QAE.svp.adult_whole-fly_site-specific-recombination_insertion_FBgn0003651_ENCFF664QSN,remap2022_ENCSR335QAE.svp.adult_whole-fly_site-specific-recombination_insertion_FBgn0003651_ENCFF598MAC
ENCSR335QAE.svp.adult_whole-fly_site-specific-recombination_insertion_FBgn0003651	ENCSR335QAE	svp	FBgn0003651	adult	whole-fly	NA	whole-fly,site-specific-recombination,insertion	FALSE	FALSE	remap2022_ENCSR335QAE.svp.adult_whole-fly_site-specific-recombination_insertion_FBgn0003651_ENCFF697LJK,remap2022_ENCSR335QAE.svp.adult_whole-fly_site-specific-recombination_insertion_FBgn0003651_ENCFF664QSN,remap2022_ENCSR335QAE.svp.adult_whole-fly_site-specific-recombination_insertion_FBgn0003651_ENCFF598MAC
ENCSR335QAE.svp.adult_whole-fly_site-specific-recombination_insertion_FBgn0003651	ENCSR335QAE	svp	FBgn0003651	adult	whole-fly	NA	whole-fly,site-specific-recombination,insertion	FALSE	FALSE	remap2022_ENCSR335QAE.svp.adult_whole-fly_site-specific-recombination_insertion_FBgn0003651_ENCFF697LJK,remap2022_ENCSR335QAE.svp.adult_whole-fly_site-specific-recombination_insertion_FBgn0003651_ENCFF664QSN,remap2022_ENCSR335QAE.svp.adult_whole-fly_site-specific-recombination_insertion_FBgn0003651_ENCFF598MAC
ENCSR335WXQ.hng2.adult_whole-fly_site-specific-recombination_insertion_FBgn0037634	ENCSR335WXQ	hng2	FBgn0037634	adult	whole-fly	NA	whole-fly,site-specific-recombination,insertion	FALSE	FALSE	remap2022_ENCSR335WXQ.hng2.adult_whole-fly_site-specific-recombination_insertion_FBgn0037634_ENCFF351GKJ,remap2022_ENCSR335WXQ.hng2.adult_whole-fly_site-specific-recombination_insertion_FBgn0037634_ENCFF698EJP
ENCSR335WXQ.hng2.adult_whole-fly_site-specific-recombination_insertion_FBgn0037634	ENCSR335WXQ	hng2	FBgn0037634	adult	whole-fly	NA	whole-fly,site-specific-recombination,insertion	FALSE	FALSE	remap2022_ENCSR335WXQ.hng2.adult_whole-fly_site-specific-recombination_insertion_FBgn0037634_ENCFF351GKJ,remap2022_ENCSR335WXQ.hng2.adult_whole-fly_site-specific-recombination_insertion_FBgn0037634_ENCFF698EJP
ENCSR336HCG.CG30431.adult_whole-fly_site-specific-recombination_insertion_FBgn0050431	ENCSR336HCG	CG30431	FBgn0050431	adult	whole-fly	NA	whole-fly,site-specific-recombination,insertion	FALSE	FALSE	remap2022_ENCSR336HCG.CG30431.adult_whole-fly_site-specific-recombination_insertion_FBgn0050431_ENCFF572CLI,remap2022_ENCSR336HCG.CG30431.adult_whole-fly_site-specific-recombination_insertion_FBgn0050431_ENCFF858JXW
ENCSR336HCG.CG30431.adult_whole-fly_site-specific-recombination_insertion_FBgn0050431	ENCSR336HCG	CG30431	FBgn0050431	adult	whole-fly	NA	whole-fly,site-specific-recombination,insertion	FALSE	FALSE	remap2022_ENCSR336HCG.CG30431.adult_whole-fly_site-specific-recombination_insertion_FBgn0050431_ENCFF572CLI,remap2022_ENCSR336HCG.CG30431.adult_whole-fly_site-specific-recombination_insertion_FBgn0050431_ENCFF858JXW
ENCSR336ZDD.CG17186.adult_whole-fly_site-specific-recombination_insertion_FBgn0038741	ENCSR336ZDD	CG17186	FBgn0038741	adult	whole-fly	NA	whole-fly,site-specific-recombination,insertion	FALSE	FALSE	remap2022_ENCSR336ZDD.CG17186.adult_whole-fly_site-specific-recombination_insertion_FBgn0038741_ENCFF398CTS,remap2022_ENCSR336ZDD.CG17186.adult_whole-fly_site-specific-recombination_insertion_FBgn0038741_ENCFF393DCI,remap2022_ENCSR336ZDD.CG17186.adult_whole-fly_site-specific-recombination_insertion_FBgn0038741_ENCFF848AQW
ENCSR336ZDD.CG17186.adult_whole-fly_site-specific-recombination_insertion_FBgn0038741	ENCSR336ZDD	CG17186	FBgn0038741	adult	whole-fly	NA	whole-fly,site-specific-recombination,insertion	FALSE	FALSE	remap2022_ENCSR336ZDD.CG17186.adult_whole-fly_site-specific-recombination_insertion_FBgn0038741_ENCFF398CTS,remap2022_ENCSR336ZDD.CG17186.adult_whole-fly_site-specific-recombination_insertion_FBgn0038741_ENCFF393DCI,remap2022_ENCSR336ZDD.CG17186.adult_whole-fly_site-specific-recombination_insertion_FBgn0038741_ENCFF848AQW
ENCSR336ZDD.CG17186.adult_whole-fly_site-specific-recombination_insertion_FBgn0038741	ENCSR336ZDD	CG17186	FBgn0038741	adult	whole-fly	NA	whole-fly,site-specific-recombination,insertion	FALSE	FALSE	remap2022_ENCSR336ZDD.CG17186.adult_whole-fly_site-specific-recombination_insertion_FBgn0038741_ENCFF398CTS,remap2022_ENCSR336ZDD.CG17186.adult_whole-fly_site-specific-recombination_insertion_FBgn0038741_ENCFF393DCI,remap2022_ENCSR336ZDD.CG17186.adult_whole-fly_site-specific-recombination_insertion_FBgn0038741_ENCFF848AQW
ENCSR339IEZ.Pdp1.adult_whole-fly_site-specific-recombination_insertion_FBgn0016694	ENCSR339IEZ	Pdp1	FBgn0016694	adult	whole-fly	NA	whole-fly,site-specific-recombination,insertion	FALSE	FALSE	remap2022_ENCSR339IEZ.Pdp1.adult_whole-fly_site-specific-recombination_insertion_FBgn0016694_ENCFF303AYX,remap2022_ENCSR339IEZ.Pdp1.adult_whole-fly_site-specific-recombination_insertion_FBgn0016694_ENCFF274OOA,remap2022_ENCSR339IEZ.Pdp1.adult_whole-fly_site-specific-recombination_insertion_FBgn0016694_ENCFF660XJT
ENCSR339IEZ.Pdp1.adult_whole-fly_site-specific-recombination_insertion_FBgn0016694	ENCSR339IEZ	Pdp1	FBgn0016694	adult	whole-fly	NA	whole-fly,site-specific-recombination,insertion	FALSE	FALSE	remap2022_ENCSR339IEZ.Pdp1.adult_whole-fly_site-specific-recombination_insertion_FBgn0016694_ENCFF303AYX,remap2022_ENCSR339IEZ.Pdp1.adult_whole-fly_site-specific-recombination_insertion_FBgn0016694_ENCFF274OOA,remap2022_ENCSR339IEZ.Pdp1.adult_whole-fly_site-specific-recombination_insertion_FBgn0016694_ENCFF660XJT
ENCSR339IEZ.Pdp1.adult_whole-fly_site-specific-recombination_insertion_FBgn0016694	ENCSR339IEZ	Pdp1	FBgn0016694	adult	whole-fly	NA	whole-fly,site-specific-recombination,insertion	FALSE	FALSE	remap2022_ENCSR339IEZ.Pdp1.adult_whole-fly_site-specific-recombination_insertion_FBgn0016694_ENCFF303AYX,remap2022_ENCSR339IEZ.Pdp1.adult_whole-fly_site-specific-recombination_insertion_FBgn0016694_ENCFF274OOA,remap2022_ENCSR339IEZ.Pdp1.adult_whole-fly_site-specific-recombination_insertion_FBgn0016694_ENCFF660XJT
ENCSR339ZDU.dpn.adult_whole-fly_site-specific-recombination_insertion_FBgn0010109	ENCSR339ZDU	dpn	FBgn0010109	adult	whole-fly	NA	whole-fly,site-specific-recombination,insertion	FALSE	FALSE	remap2022_ENCSR339ZDU.dpn.adult_whole-fly_site-specific-recombination_insertion_FBgn0010109_ENCFF364FZV,remap2022_ENCSR339ZDU.dpn.adult_whole-fly_site-specific-recombination_insertion_FBgn0010109_ENCFF586LFJ,remap2022_ENCSR339ZDU.dpn.adult_whole-fly_site-specific-recombination_insertion_FBgn0010109_ENCFF869PQI
ENCSR339ZDU.dpn.adult_whole-fly_site-specific-recombination_insertion_FBgn0010109	ENCSR339ZDU	dpn	FBgn0010109	adult	whole-fly	NA	whole-fly,site-specific-recombination,insertion	FALSE	FALSE	remap2022_ENCSR339ZDU.dpn.adult_whole-fly_site-specific-recombination_insertion_FBgn0010109_ENCFF364FZV,remap2022_ENCSR339ZDU.dpn.adult_whole-fly_site-specific-recombination_insertion_FBgn0010109_ENCFF586LFJ,remap2022_ENCSR339ZDU.dpn.adult_whole-fly_site-specific-recombination_insertion_FBgn0010109_ENCFF869PQI
ENCSR339ZDU.dpn.adult_whole-fly_site-specific-recombination_insertion_FBgn0010109	ENCSR339ZDU	dpn	FBgn0010109	adult	whole-fly	NA	whole-fly,site-specific-recombination,insertion	FALSE	FALSE	remap2022_ENCSR339ZDU.dpn.adult_whole-fly_site-specific-recombination_insertion_FBgn0010109_ENCFF364FZV,remap2022_ENCSR339ZDU.dpn.adult_whole-fly_site-specific-recombination_insertion_FBgn0010109_ENCFF586LFJ,remap2022_ENCSR339ZDU.dpn.adult_whole-fly_site-specific-recombination_insertion_FBgn0010109_ENCFF869PQI
ENCSR340CQF.CG15073.adult_whole-fly_site-specific-recombination_insertion_FBgn0034379	ENCSR340CQF	CG15073	FBgn0034379	adult	whole-fly	NA	whole-fly,site-specific-recombination,insertion	FALSE	FALSE	remap2022_ENCSR340CQF.CG15073.adult_whole-fly_site-specific-recombination_insertion_FBgn0034379_ENCFF998SGM,remap2022_ENCSR340CQF.CG15073.adult_whole-fly_site-specific-recombination_insertion_FBgn0034379_ENCFF888KEN
ENCSR340CQF.CG15073.adult_whole-fly_site-specific-recombination_insertion_FBgn0034379	ENCSR340CQF	CG15073	FBgn0034379	adult	whole-fly	NA	whole-fly,site-specific-recombination,insertion	FALSE	FALSE	remap2022_ENCSR340CQF.CG15073.adult_whole-fly_site-specific-recombination_insertion_FBgn0034379_ENCFF998SGM,remap2022_ENCSR340CQF.CG15073.adult_whole-fly_site-specific-recombination_insertion_FBgn0034379_ENCFF888KEN
ENCSR342YUI.ash1.adult_whole-fly_site-specific-recombination_insertion_FBgn0005386	ENCSR342YUI	ash1	FBgn0005386	adult	whole-fly	NA	whole-fly,site-specific-recombination,insertion	FALSE	FALSE	remap2022_ENCSR342YUI.ash1.adult_whole-fly_site-specific-recombination_insertion_FBgn0005386_ENCFF322HYL,remap2022_ENCSR342YUI.ash1.adult_whole-fly_site-specific-recombination_insertion_FBgn0005386_ENCFF632SSA
ENCSR342YUI.ash1.adult_whole-fly_site-specific-recombination_insertion_FBgn0005386	ENCSR342YUI	ash1	FBgn0005386	adult	whole-fly	NA	whole-fly,site-specific-recombination,insertion	FALSE	FALSE	remap2022_ENCSR342YUI.ash1.adult_whole-fly_site-specific-recombination_insertion_FBgn0005386_ENCFF322HYL,remap2022_ENCSR342YUI.ash1.adult_whole-fly_site-specific-recombination_insertion_FBgn0005386_ENCFF632SSA
ENCSR354KRW.CG14965.adult_whole-fly_site-specific-recombination_insertion_FBgn0035414	ENCSR354KRW	CG14965	FBgn0035414	adult	whole-fly	NA	whole-fly,site-specific-recombination,insertion	FALSE	FALSE	remap2022_ENCSR354KRW.CG14965.adult_whole-fly_site-specific-recombination_insertion_FBgn0035414_ENCFF210WVK,remap2022_ENCSR354KRW.CG14965.adult_whole-fly_site-specific-recombination_insertion_FBgn0035414_ENCFF543UKD
ENCSR354KRW.CG14965.adult_whole-fly_site-specific-recombination_insertion_FBgn0035414	ENCSR354KRW	CG14965	FBgn0035414	adult	whole-fly	NA	whole-fly,site-specific-recombination,insertion	FALSE	FALSE	remap2022_ENCSR354KRW.CG14965.adult_whole-fly_site-specific-recombination_insertion_FBgn0035414_ENCFF210WVK,remap2022_ENCSR354KRW.CG14965.adult_whole-fly_site-specific-recombination_insertion_FBgn0035414_ENCFF543UKD
ENCSR358XYO.Hr96.adult_whole-fly_site-specific-recombination_insertion_FBgn0015240	ENCSR358XYO	Hr96	FBgn0015240	adult	whole-fly	NA	whole-fly,site-specific-recombination,insertion	FALSE	FALSE	remap2022_ENCSR358XYO.Hr96.adult_whole-fly_site-specific-recombination_insertion_FBgn0015240_ENCFF749MJP,remap2022_ENCSR358XYO.Hr96.adult_whole-fly_site-specific-recombination_insertion_FBgn0015240_ENCFF645SLX
ENCSR358XYO.Hr96.adult_whole-fly_site-specific-recombination_insertion_FBgn0015240	ENCSR358XYO	Hr96	FBgn0015240	adult	whole-fly	NA	whole-fly,site-specific-recombination,insertion	FALSE	FALSE	remap2022_ENCSR358XYO.Hr96.adult_whole-fly_site-specific-recombination_insertion_FBgn0015240_ENCFF749MJP,remap2022_ENCSR358XYO.Hr96.adult_whole-fly_site-specific-recombination_insertion_FBgn0015240_ENCFF645SLX
ENCSR359ZMS.fu2.adult_whole-fly_site-specific-recombination_insertion_FBgn0029173	ENCSR359ZMS	fu2	FBgn0029173	adult	whole-fly	NA	whole-fly,site-specific-recombination,insertion	FALSE	FALSE	remap2022_ENCSR359ZMS.fu2.adult_whole-fly_site-specific-recombination_insertion_FBgn0029173_ENCFF349WXV,remap2022_ENCSR359ZMS.fu2.adult_whole-fly_site-specific-recombination_insertion_FBgn0029173_ENCFF801FQA
ENCSR359ZMS.fu2.adult_whole-fly_site-specific-recombination_insertion_FBgn0029173	ENCSR359ZMS	fu2	FBgn0029173	adult	whole-fly	NA	whole-fly,site-specific-recombination,insertion	FALSE	FALSE	remap2022_ENCSR359ZMS.fu2.adult_whole-fly_site-specific-recombination_insertion_FBgn0029173_ENCFF349WXV,remap2022_ENCSR359ZMS.fu2.adult_whole-fly_site-specific-recombination_insertion_FBgn0029173_ENCFF801FQA
ENCSR360ERR.CG33017.adult_whole-fly_site-specific-recombination_insertion_FBgn0053017	ENCSR360ERR	CG33017	FBgn0053017	adult	whole-fly	NA	whole-fly,site-specific-recombination,insertion	FALSE	FALSE	remap2022_ENCSR360ERR.CG33017.adult_whole-fly_site-specific-recombination_insertion_FBgn0053017_ENCFF994ZRM,remap2022_ENCSR360ERR.CG33017.adult_whole-fly_site-specific-recombination_insertion_FBgn0053017_ENCFF467CKM
ENCSR360ERR.CG33017.adult_whole-fly_site-specific-recombination_insertion_FBgn0053017	ENCSR360ERR	CG33017	FBgn0053017	adult	whole-fly	NA	whole-fly,site-specific-recombination,insertion	FALSE	FALSE	remap2022_ENCSR360ERR.CG33017.adult_whole-fly_site-specific-recombination_insertion_FBgn0053017_ENCFF994ZRM,remap2022_ENCSR360ERR.CG33017.adult_whole-fly_site-specific-recombination_insertion_FBgn0053017_ENCFF467CKM
ENCSR360TFL.CG31388.adult_whole-fly_site-specific-recombination_insertion_FBgn0051388	ENCSR360TFL	CG31388	FBgn0051388	adult	whole-fly	NA	whole-fly,site-specific-recombination,insertion	FALSE	FALSE	remap2022_ENCSR360TFL.CG31388.adult_whole-fly_site-specific-recombination_insertion_FBgn0051388_ENCFF006EPS,remap2022_ENCSR360TFL.CG31388.adult_whole-fly_site-specific-recombination_insertion_FBgn0051388_ENCFF807GQV
ENCSR360TFL.CG31388.adult_whole-fly_site-specific-recombination_insertion_FBgn0051388	ENCSR360TFL	CG31388	FBgn0051388	adult	whole-fly	NA	whole-fly,site-specific-recombination,insertion	FALSE	FALSE	remap2022_ENCSR360TFL.CG31388.adult_whole-fly_site-specific-recombination_insertion_FBgn0051388_ENCFF006EPS,remap2022_ENCSR360TFL.CG31388.adult_whole-fly_site-specific-recombination_insertion_FBgn0051388_ENCFF807GQV
ENCSR360TVA.Su-H.adult_whole-fly_FBgn0004837	ENCSR360TVA	Su-H	FBgn0004837	adult	whole-fly	NA	whole-fly	FALSE	FALSE	remap2022_ENCSR360TVA.Su-H.adult_whole-fly_FBgn0004837_ENCFF216XYW,remap2022_ENCSR360TVA.Su-H.adult_whole-fly_FBgn0004837_ENCFF791YPZ,remap2022_ENCSR360TVA.Su-H.adult_whole-fly_FBgn0004837_ENCFF624QFY
ENCSR360TVA.Su-H.adult_whole-fly_FBgn0004837	ENCSR360TVA	Su-H	FBgn0004837	adult	whole-fly	NA	whole-fly	FALSE	FALSE	remap2022_ENCSR360TVA.Su-H.adult_whole-fly_FBgn0004837_ENCFF216XYW,remap2022_ENCSR360TVA.Su-H.adult_whole-fly_FBgn0004837_ENCFF791YPZ,remap2022_ENCSR360TVA.Su-H.adult_whole-fly_FBgn0004837_ENCFF624QFY
ENCSR360TVA.Su-H.adult_whole-fly_FBgn0004837	ENCSR360TVA	Su-H	FBgn0004837	adult	whole-fly	NA	whole-fly	FALSE	FALSE	remap2022_ENCSR360TVA.Su-H.adult_whole-fly_FBgn0004837_ENCFF216XYW,remap2022_ENCSR360TVA.Su-H.adult_whole-fly_FBgn0004837_ENCFF791YPZ,remap2022_ENCSR360TVA.Su-H.adult_whole-fly_FBgn0004837_ENCFF624QFY
ENCSR360YKV.cnc.adult_whole-fly_site-specific-recombination_insertion_FBgn0262975	ENCSR360YKV	cnc	FBgn0262975	adult	whole-fly	NA	whole-fly,site-specific-recombination,insertion	FALSE	FALSE	remap2022_ENCSR360YKV.cnc.adult_whole-fly_site-specific-recombination_insertion_FBgn0262975_ENCFF513JIZ,remap2022_ENCSR360YKV.cnc.adult_whole-fly_site-specific-recombination_insertion_FBgn0262975_ENCFF546AGE
ENCSR360YKV.cnc.adult_whole-fly_site-specific-recombination_insertion_FBgn0262975	ENCSR360YKV	cnc	FBgn0262975	adult	whole-fly	NA	whole-fly,site-specific-recombination,insertion	FALSE	FALSE	remap2022_ENCSR360YKV.cnc.adult_whole-fly_site-specific-recombination_insertion_FBgn0262975_ENCFF513JIZ,remap2022_ENCSR360YKV.cnc.adult_whole-fly_site-specific-recombination_insertion_FBgn0262975_ENCFF546AGE
ENCSR363SHZ.Met.adult_whole-fly_site-specific-recombination_insertion_FBgn0002723	ENCSR363SHZ	Met	FBgn0002723	adult	whole-fly	NA	whole-fly,site-specific-recombination,insertion	FALSE	FALSE	remap2022_ENCSR363SHZ.Met.adult_whole-fly_site-specific-recombination_insertion_FBgn0002723_ENCFF860DCW,remap2022_ENCSR363SHZ.Met.adult_whole-fly_site-specific-recombination_insertion_FBgn0002723_ENCFF476LHE,remap2022_ENCSR363SHZ.Met.adult_whole-fly_site-specific-recombination_insertion_FBgn0002723_ENCFF622PGO
ENCSR363SHZ.Met.adult_whole-fly_site-specific-recombination_insertion_FBgn0002723	ENCSR363SHZ	Met	FBgn0002723	adult	whole-fly	NA	whole-fly,site-specific-recombination,insertion	FALSE	FALSE	remap2022_ENCSR363SHZ.Met.adult_whole-fly_site-specific-recombination_insertion_FBgn0002723_ENCFF860DCW,remap2022_ENCSR363SHZ.Met.adult_whole-fly_site-specific-recombination_insertion_FBgn0002723_ENCFF476LHE,remap2022_ENCSR363SHZ.Met.adult_whole-fly_site-specific-recombination_insertion_FBgn0002723_ENCFF622PGO
ENCSR363SHZ.Met.adult_whole-fly_site-specific-recombination_insertion_FBgn0002723	ENCSR363SHZ	Met	FBgn0002723	adult	whole-fly	NA	whole-fly,site-specific-recombination,insertion	FALSE	FALSE	remap2022_ENCSR363SHZ.Met.adult_whole-fly_site-specific-recombination_insertion_FBgn0002723_ENCFF860DCW,remap2022_ENCSR363SHZ.Met.adult_whole-fly_site-specific-recombination_insertion_FBgn0002723_ENCFF476LHE,remap2022_ENCSR363SHZ.Met.adult_whole-fly_site-specific-recombination_insertion_FBgn0002723_ENCFF622PGO
ENCSR365BOA.E-spl-m8-HLH.adult_whole-fly_site-specific-recombination_insertion_FBgn0000591	ENCSR365BOA	E-spl-m8-HLH	FBgn0000591	adult	whole-fly	NA	whole-fly,site-specific-recombination,insertion	FALSE	FALSE	remap2022_ENCSR365BOA.E-spl-m8-HLH.adult_whole-fly_site-specific-recombination_insertion_FBgn0000591_ENCFF890YZQ,remap2022_ENCSR365BOA.E-spl-m8-HLH.adult_whole-fly_site-specific-recombination_insertion_FBgn0000591_ENCFF712BCZ
ENCSR365BOA.E-spl-m8-HLH.adult_whole-fly_site-specific-recombination_insertion_FBgn0000591	ENCSR365BOA	E-spl-m8-HLH	FBgn0000591	adult	whole-fly	NA	whole-fly,site-specific-recombination,insertion	FALSE	FALSE	remap2022_ENCSR365BOA.E-spl-m8-HLH.adult_whole-fly_site-specific-recombination_insertion_FBgn0000591_ENCFF890YZQ,remap2022_ENCSR365BOA.E-spl-m8-HLH.adult_whole-fly_site-specific-recombination_insertion_FBgn0000591_ENCFF712BCZ
ENCSR365IMJ.dmrt11E.adult_whole-fly_site-specific-recombination_insertion_FBgn0030477	ENCSR365IMJ	dmrt11E	FBgn0030477	adult	whole-fly	NA	whole-fly,site-specific-recombination,insertion	FALSE	FALSE	remap2022_ENCSR365IMJ.dmrt11E.adult_whole-fly_site-specific-recombination_insertion_FBgn0030477_ENCFF992GNM,remap2022_ENCSR365IMJ.dmrt11E.adult_whole-fly_site-specific-recombination_insertion_FBgn0030477_ENCFF015RNF,remap2022_ENCSR365IMJ.dmrt11E.adult_whole-fly_site-specific-recombination_insertion_FBgn0030477_ENCFF864VIQ,remap2022_ENCSR365IMJ.dmrt11E.adult_whole-fly_site-specific-recombination_i…
ENCSR365IMJ.dmrt11E.adult_whole-fly_site-specific-recombination_insertion_FBgn0030477	ENCSR365IMJ	dmrt11E	FBgn0030477	adult	whole-fly	NA	whole-fly,site-specific-recombination,insertion	FALSE	FALSE	remap2022_ENCSR365IMJ.dmrt11E.adult_whole-fly_site-specific-recombination_insertion_FBgn0030477_ENCFF992GNM,remap2022_ENCSR365IMJ.dmrt11E.adult_whole-fly_site-specific-recombination_insertion_FBgn0030477_ENCFF015RNF,remap2022_ENCSR365IMJ.dmrt11E.adult_whole-fly_site-specific-recombination_insertion_FBgn0030477_ENCFF864VIQ,remap2022_ENCSR365IMJ.dmrt11E.adult_whole-fly_site-specific-recombination_i…
ENCSR365IMJ.dmrt11E.adult_whole-fly_site-specific-recombination_insertion_FBgn0030477	ENCSR365IMJ	dmrt11E	FBgn0030477	adult	whole-fly	NA	whole-fly,site-specific-recombination,insertion	FALSE	FALSE	remap2022_ENCSR365IMJ.dmrt11E.adult_whole-fly_site-specific-recombination_insertion_FBgn0030477_ENCFF992GNM,remap2022_ENCSR365IMJ.dmrt11E.adult_whole-fly_site-specific-recombination_insertion_FBgn0030477_ENCFF015RNF,remap2022_ENCSR365IMJ.dmrt11E.adult_whole-fly_site-specific-recombination_insertion_FBgn0030477_ENCFF864VIQ,remap2022_ENCSR365IMJ.dmrt11E.adult_whole-fly_site-specific-recombination_i…
ENCSR365IMJ.dmrt11E.adult_whole-fly_site-specific-recombination_insertion_FBgn0030477	ENCSR365IMJ	dmrt11E	FBgn0030477	adult	whole-fly	NA	whole-fly,site-specific-recombination,insertion	FALSE	FALSE	remap2022_ENCSR365IMJ.dmrt11E.adult_whole-fly_site-specific-recombination_insertion_FBgn0030477_ENCFF992GNM,remap2022_ENCSR365IMJ.dmrt11E.adult_whole-fly_site-specific-recombination_insertion_FBgn0030477_ENCFF015RNF,remap2022_ENCSR365IMJ.dmrt11E.adult_whole-fly_site-specific-recombination_insertion_FBgn0030477_ENCFF864VIQ,remap2022_ENCSR365IMJ.dmrt11E.adult_whole-fly_site-specific-recombination_i…
ENCSR367SBM.Fer3.adult_whole-fly_site-specific-recombination_insertion_FBgn0037937	ENCSR367SBM	Fer3	FBgn0037937	adult	whole-fly	NA	whole-fly,site-specific-recombination,insertion	FALSE	FALSE	remap2022_ENCSR367SBM.Fer3.adult_whole-fly_site-specific-recombination_insertion_FBgn0037937_ENCFF453BPH,remap2022_ENCSR367SBM.Fer3.adult_whole-fly_site-specific-recombination_insertion_FBgn0037937_ENCFF132LJS
ENCSR367SBM.Fer3.adult_whole-fly_site-specific-recombination_insertion_FBgn0037937	ENCSR367SBM	Fer3	FBgn0037937	adult	whole-fly	NA	whole-fly,site-specific-recombination,insertion	FALSE	FALSE	remap2022_ENCSR367SBM.Fer3.adult_whole-fly_site-specific-recombination_insertion_FBgn0037937_ENCFF453BPH,remap2022_ENCSR367SBM.Fer3.adult_whole-fly_site-specific-recombination_insertion_FBgn0037937_ENCFF132LJS
ENCSR373BIM.shn.adult_whole-fly_site-specific-recombination_insertion_FBgn0003396	ENCSR373BIM	shn	FBgn0003396	adult	whole-fly	NA	whole-fly,site-specific-recombination,insertion	FALSE	FALSE	remap2022_ENCSR373BIM.shn.adult_whole-fly_site-specific-recombination_insertion_FBgn0003396_ENCFF314TWG,remap2022_ENCSR373BIM.shn.adult_whole-fly_site-specific-recombination_insertion_FBgn0003396_ENCFF814EMM,remap2022_ENCSR373BIM.shn.adult_whole-fly_site-specific-recombination_insertion_FBgn0003396_ENCFF107IIN
ENCSR373BIM.shn.adult_whole-fly_site-specific-recombination_insertion_FBgn0003396	ENCSR373BIM	shn	FBgn0003396	adult	whole-fly	NA	whole-fly,site-specific-recombination,insertion	FALSE	FALSE	remap2022_ENCSR373BIM.shn.adult_whole-fly_site-specific-recombination_insertion_FBgn0003396_ENCFF314TWG,remap2022_ENCSR373BIM.shn.adult_whole-fly_site-specific-recombination_insertion_FBgn0003396_ENCFF814EMM,remap2022_ENCSR373BIM.shn.adult_whole-fly_site-specific-recombination_insertion_FBgn0003396_ENCFF107IIN
ENCSR373BIM.shn.adult_whole-fly_site-specific-recombination_insertion_FBgn0003396	ENCSR373BIM	shn	FBgn0003396	adult	whole-fly	NA	whole-fly,site-specific-recombination,insertion	FALSE	FALSE	remap2022_ENCSR373BIM.shn.adult_whole-fly_site-specific-recombination_insertion_FBgn0003396_ENCFF314TWG,remap2022_ENCSR373BIM.shn.adult_whole-fly_site-specific-recombination_insertion_FBgn0003396_ENCFF814EMM,remap2022_ENCSR373BIM.shn.adult_whole-fly_site-specific-recombination_insertion_FBgn0003396_ENCFF107IIN
ENCSR376EUJ.Lpt.adult_whole-fly_insertion_FBgn0263667	ENCSR376EUJ	Lpt	FBgn0263667	adult	whole-fly	NA	whole-fly,insertion	FALSE	FALSE	remap2022_ENCSR376EUJ.Lpt.adult_whole-fly_insertion_FBgn0263667_ENCFF173ZFP,remap2022_ENCSR376EUJ.Lpt.adult_whole-fly_insertion_FBgn0263667_ENCFF798KRG
ENCSR376EUJ.Lpt.adult_whole-fly_insertion_FBgn0263667	ENCSR376EUJ	Lpt	FBgn0263667	adult	whole-fly	NA	whole-fly,insertion	FALSE	FALSE	remap2022_ENCSR376EUJ.Lpt.adult_whole-fly_insertion_FBgn0263667_ENCFF173ZFP,remap2022_ENCSR376EUJ.Lpt.adult_whole-fly_insertion_FBgn0263667_ENCFF798KRG
ENCSR377EUZ.EcR.adult_whole-fly_insertion_FBgn0000546	ENCSR377EUZ	EcR	FBgn0000546	adult	whole-fly	NA	whole-fly,insertion	FALSE	FALSE	remap2022_ENCSR377EUZ.EcR.adult_whole-fly_insertion_FBgn0000546_ENCFF809JOU,remap2022_ENCSR377EUZ.EcR.adult_whole-fly_insertion_FBgn0000546_ENCFF598SIP,remap2022_ENCSR377EUZ.EcR.adult_whole-fly_insertion_FBgn0000546_ENCFF233VLD
ENCSR377EUZ.EcR.adult_whole-fly_insertion_FBgn0000546	ENCSR377EUZ	EcR	FBgn0000546	adult	whole-fly	NA	whole-fly,insertion	FALSE	FALSE	remap2022_ENCSR377EUZ.EcR.adult_whole-fly_insertion_FBgn0000546_ENCFF809JOU,remap2022_ENCSR377EUZ.EcR.adult_whole-fly_insertion_FBgn0000546_ENCFF598SIP,remap2022_ENCSR377EUZ.EcR.adult_whole-fly_insertion_FBgn0000546_ENCFF233VLD
ENCSR377EUZ.EcR.adult_whole-fly_insertion_FBgn0000546	ENCSR377EUZ	EcR	FBgn0000546	adult	whole-fly	NA	whole-fly,insertion	FALSE	FALSE	remap2022_ENCSR377EUZ.EcR.adult_whole-fly_insertion_FBgn0000546_ENCFF809JOU,remap2022_ENCSR377EUZ.EcR.adult_whole-fly_insertion_FBgn0000546_ENCFF598SIP,remap2022_ENCSR377EUZ.EcR.adult_whole-fly_insertion_FBgn0000546_ENCFF233VLD
ENCSR378UYF.Blimp-1.adult_whole-fly_site-specific-recombination_insertion_FBgn0035625	ENCSR378UYF	Blimp-1	FBgn0035625	adult	whole-fly	NA	whole-fly,site-specific-recombination,insertion	FALSE	FALSE	remap2022_ENCSR378UYF.Blimp-1.adult_whole-fly_site-specific-recombination_insertion_FBgn0035625_ENCFF756HFT,remap2022_ENCSR378UYF.Blimp-1.adult_whole-fly_site-specific-recombination_insertion_FBgn0035625_ENCFF172SUX,remap2022_ENCSR378UYF.Blimp-1.adult_whole-fly_site-specific-recombination_insertion_FBgn0035625_ENCFF774TBO,remap2022_ENCSR378UYF.Blimp-1.adult_whole-fly_site-specific-recombination_i…
ENCSR378UYF.Blimp-1.adult_whole-fly_site-specific-recombination_insertion_FBgn0035625	ENCSR378UYF	Blimp-1	FBgn0035625	adult	whole-fly	NA	whole-fly,site-specific-recombination,insertion	FALSE	FALSE	remap2022_ENCSR378UYF.Blimp-1.adult_whole-fly_site-specific-recombination_insertion_FBgn0035625_ENCFF756HFT,remap2022_ENCSR378UYF.Blimp-1.adult_whole-fly_site-specific-recombination_insertion_FBgn0035625_ENCFF172SUX,remap2022_ENCSR378UYF.Blimp-1.adult_whole-fly_site-specific-recombination_insertion_FBgn0035625_ENCFF774TBO,remap2022_ENCSR378UYF.Blimp-1.adult_whole-fly_site-specific-recombination_i…
ENCSR378UYF.Blimp-1.adult_whole-fly_site-specific-recombination_insertion_FBgn0035625	ENCSR378UYF	Blimp-1	FBgn0035625	adult	whole-fly	NA	whole-fly,site-specific-recombination,insertion	FALSE	FALSE	remap2022_ENCSR378UYF.Blimp-1.adult_whole-fly_site-specific-recombination_insertion_FBgn0035625_ENCFF756HFT,remap2022_ENCSR378UYF.Blimp-1.adult_whole-fly_site-specific-recombination_insertion_FBgn0035625_ENCFF172SUX,remap2022_ENCSR378UYF.Blimp-1.adult_whole-fly_site-specific-recombination_insertion_FBgn0035625_ENCFF774TBO,remap2022_ENCSR378UYF.Blimp-1.adult_whole-fly_site-specific-recombination_i…
ENCSR378UYF.Blimp-1.adult_whole-fly_site-specific-recombination_insertion_FBgn0035625	ENCSR378UYF	Blimp-1	FBgn0035625	adult	whole-fly	NA	whole-fly,site-specific-recombination,insertion	FALSE	FALSE	remap2022_ENCSR378UYF.Blimp-1.adult_whole-fly_site-specific-recombination_insertion_FBgn0035625_ENCFF756HFT,remap2022_ENCSR378UYF.Blimp-1.adult_whole-fly_site-specific-recombination_insertion_FBgn0035625_ENCFF172SUX,remap2022_ENCSR378UYF.Blimp-1.adult_whole-fly_site-specific-recombination_insertion_FBgn0035625_ENCFF774TBO,remap2022_ENCSR378UYF.Blimp-1.adult_whole-fly_site-specific-recombination_i…
ENCSR378UYF.Blimp-1.adult_whole-fly_site-specific-recombination_insertion_FBgn0035625	ENCSR378UYF	Blimp-1	FBgn0035625	adult	whole-fly	NA	whole-fly,site-specific-recombination,insertion	FALSE	FALSE	remap2022_ENCSR378UYF.Blimp-1.adult_whole-fly_site-specific-recombination_insertion_FBgn0035625_ENCFF756HFT,remap2022_ENCSR378UYF.Blimp-1.adult_whole-fly_site-specific-recombination_insertion_FBgn0035625_ENCFF172SUX,remap2022_ENCSR378UYF.Blimp-1.adult_whole-fly_site-specific-recombination_insertion_FBgn0035625_ENCFF774TBO,remap2022_ENCSR378UYF.Blimp-1.adult_whole-fly_site-specific-recombination_i…
ENCSR386BKJ.CG1602.adult_whole-fly_site-specific-recombination_insertion_FBgn0033186	ENCSR386BKJ	CG1602	FBgn0033186	adult	whole-fly	NA	whole-fly,site-specific-recombination,insertion	FALSE	FALSE	remap2022_ENCSR386BKJ.CG1602.adult_whole-fly_site-specific-recombination_insertion_FBgn0033186_ENCFF941ZIL,remap2022_ENCSR386BKJ.CG1602.adult_whole-fly_site-specific-recombination_insertion_FBgn0033186_ENCFF827QOU,remap2022_ENCSR386BKJ.CG1602.adult_whole-fly_site-specific-recombination_insertion_FBgn0033186_ENCFF806FYI
ENCSR386BKJ.CG1602.adult_whole-fly_site-specific-recombination_insertion_FBgn0033186	ENCSR386BKJ	CG1602	FBgn0033186	adult	whole-fly	NA	whole-fly,site-specific-recombination,insertion	FALSE	FALSE	remap2022_ENCSR386BKJ.CG1602.adult_whole-fly_site-specific-recombination_insertion_FBgn0033186_ENCFF941ZIL,remap2022_ENCSR386BKJ.CG1602.adult_whole-fly_site-specific-recombination_insertion_FBgn0033186_ENCFF827QOU,remap2022_ENCSR386BKJ.CG1602.adult_whole-fly_site-specific-recombination_insertion_FBgn0033186_ENCFF806FYI
ENCSR386BKJ.CG1602.adult_whole-fly_site-specific-recombination_insertion_FBgn0033186	ENCSR386BKJ	CG1602	FBgn0033186	adult	whole-fly	NA	whole-fly,site-specific-recombination,insertion	FALSE	FALSE	remap2022_ENCSR386BKJ.CG1602.adult_whole-fly_site-specific-recombination_insertion_FBgn0033186_ENCFF941ZIL,remap2022_ENCSR386BKJ.CG1602.adult_whole-fly_site-specific-recombination_insertion_FBgn0033186_ENCFF827QOU,remap2022_ENCSR386BKJ.CG1602.adult_whole-fly_site-specific-recombination_insertion_FBgn0033186_ENCFF806FYI
ENCSR388YUZ.Jarid2.adult_whole-fly_site-specific-recombination_insertion_FBgn0036004	ENCSR388YUZ	Jarid2	FBgn0036004	adult	whole-fly	NA	whole-fly,site-specific-recombination,insertion	FALSE	FALSE	remap2022_ENCSR388YUZ.Jarid2.adult_whole-fly_site-specific-recombination_insertion_FBgn0036004_ENCFF090YBK,remap2022_ENCSR388YUZ.Jarid2.adult_whole-fly_site-specific-recombination_insertion_FBgn0036004_ENCFF064HTW,remap2022_ENCSR388YUZ.Jarid2.adult_whole-fly_site-specific-recombination_insertion_FBgn0036004_ENCFF649NYX
ENCSR388YUZ.Jarid2.adult_whole-fly_site-specific-recombination_insertion_FBgn0036004	ENCSR388YUZ	Jarid2	FBgn0036004	adult	whole-fly	NA	whole-fly,site-specific-recombination,insertion	FALSE	FALSE	remap2022_ENCSR388YUZ.Jarid2.adult_whole-fly_site-specific-recombination_insertion_FBgn0036004_ENCFF090YBK,remap2022_ENCSR388YUZ.Jarid2.adult_whole-fly_site-specific-recombination_insertion_FBgn0036004_ENCFF064HTW,remap2022_ENCSR388YUZ.Jarid2.adult_whole-fly_site-specific-recombination_insertion_FBgn0036004_ENCFF649NYX
ENCSR388YUZ.Jarid2.adult_whole-fly_site-specific-recombination_insertion_FBgn0036004	ENCSR388YUZ	Jarid2	FBgn0036004	adult	whole-fly	NA	whole-fly,site-specific-recombination,insertion	FALSE	FALSE	remap2022_ENCSR388YUZ.Jarid2.adult_whole-fly_site-specific-recombination_insertion_FBgn0036004_ENCFF090YBK,remap2022_ENCSR388YUZ.Jarid2.adult_whole-fly_site-specific-recombination_insertion_FBgn0036004_ENCFF064HTW,remap2022_ENCSR388YUZ.Jarid2.adult_whole-fly_site-specific-recombination_insertion_FBgn0036004_ENCFF649NYX
ENCSR390QUD.sima.adult_whole-fly_site-specific-recombination_insertion_FBgn0266411	ENCSR390QUD	sima	FBgn0266411	adult	whole-fly	NA	whole-fly,site-specific-recombination,insertion	FALSE	FALSE	remap2022_ENCSR390QUD.sima.adult_whole-fly_site-specific-recombination_insertion_FBgn0266411_ENCFF048IYN,remap2022_ENCSR390QUD.sima.adult_whole-fly_site-specific-recombination_insertion_FBgn0266411_ENCFF309ZFF
ENCSR390QUD.sima.adult_whole-fly_site-specific-recombination_insertion_FBgn0266411	ENCSR390QUD	sima	FBgn0266411	adult	whole-fly	NA	whole-fly,site-specific-recombination,insertion	FALSE	FALSE	remap2022_ENCSR390QUD.sima.adult_whole-fly_site-specific-recombination_insertion_FBgn0266411_ENCFF048IYN,remap2022_ENCSR390QUD.sima.adult_whole-fly_site-specific-recombination_insertion_FBgn0266411_ENCFF309ZFF
ENCSR392ANZ.lbe.adult_whole-fly_site-specific-recombination_insertion_FBgn0011278	ENCSR392ANZ	lbe	FBgn0011278	adult	whole-fly	NA	whole-fly,site-specific-recombination,insertion	FALSE	FALSE	remap2022_ENCSR392ANZ.lbe.adult_whole-fly_site-specific-recombination_insertion_FBgn0011278_ENCFF493EIH,remap2022_ENCSR392ANZ.lbe.adult_whole-fly_site-specific-recombination_insertion_FBgn0011278_ENCFF824QGM
ENCSR392ANZ.lbe.adult_whole-fly_site-specific-recombination_insertion_FBgn0011278	ENCSR392ANZ	lbe	FBgn0011278	adult	whole-fly	NA	whole-fly,site-specific-recombination,insertion	FALSE	FALSE	remap2022_ENCSR392ANZ.lbe.adult_whole-fly_site-specific-recombination_insertion_FBgn0011278_ENCFF493EIH,remap2022_ENCSR392ANZ.lbe.adult_whole-fly_site-specific-recombination_insertion_FBgn0011278_ENCFF824QGM
ENCSR392IEL.run.adult_whole-fly_site-specific-recombination_insertion_FBgn0003300	ENCSR392IEL	run	FBgn0003300	adult	whole-fly	NA	whole-fly,site-specific-recombination,insertion	FALSE	FALSE	remap2022_ENCSR392IEL.run.adult_whole-fly_site-specific-recombination_insertion_FBgn0003300_ENCFF442TBB,remap2022_ENCSR392IEL.run.adult_whole-fly_site-specific-recombination_insertion_FBgn0003300_ENCFF812BYM,remap2022_ENCSR392IEL.run.adult_whole-fly_site-specific-recombination_insertion_FBgn0003300_ENCFF911SDE
ENCSR392IEL.run.adult_whole-fly_site-specific-recombination_insertion_FBgn0003300	ENCSR392IEL	run	FBgn0003300	adult	whole-fly	NA	whole-fly,site-specific-recombination,insertion	FALSE	FALSE	remap2022_ENCSR392IEL.run.adult_whole-fly_site-specific-recombination_insertion_FBgn0003300_ENCFF442TBB,remap2022_ENCSR392IEL.run.adult_whole-fly_site-specific-recombination_insertion_FBgn0003300_ENCFF812BYM,remap2022_ENCSR392IEL.run.adult_whole-fly_site-specific-recombination_insertion_FBgn0003300_ENCFF911SDE
ENCSR392IEL.run.adult_whole-fly_site-specific-recombination_insertion_FBgn0003300	ENCSR392IEL	run	FBgn0003300	adult	whole-fly	NA	whole-fly,site-specific-recombination,insertion	FALSE	FALSE	remap2022_ENCSR392IEL.run.adult_whole-fly_site-specific-recombination_insertion_FBgn0003300_ENCFF442TBB,remap2022_ENCSR392IEL.run.adult_whole-fly_site-specific-recombination_insertion_FBgn0003300_ENCFF812BYM,remap2022_ENCSR392IEL.run.adult_whole-fly_site-specific-recombination_insertion_FBgn0003300_ENCFF911SDE
ENCSR393AKW.Myb.adult_whole-fly_site-specific-recombination_insertion_FBgn0002914	ENCSR393AKW	Myb	FBgn0002914	adult	whole-fly	NA	whole-fly,site-specific-recombination,insertion	FALSE	FALSE	remap2022_ENCSR393AKW.Myb.adult_whole-fly_site-specific-recombination_insertion_FBgn0002914_ENCFF974HGW,remap2022_ENCSR393AKW.Myb.adult_whole-fly_site-specific-recombination_insertion_FBgn0002914_ENCFF864OUL
ENCSR393AKW.Myb.adult_whole-fly_site-specific-recombination_insertion_FBgn0002914	ENCSR393AKW	Myb	FBgn0002914	adult	whole-fly	NA	whole-fly,site-specific-recombination,insertion	FALSE	FALSE	remap2022_ENCSR393AKW.Myb.adult_whole-fly_site-specific-recombination_insertion_FBgn0002914_ENCFF974HGW,remap2022_ENCSR393AKW.Myb.adult_whole-fly_site-specific-recombination_insertion_FBgn0002914_ENCFF864OUL
ENCSR393QBI.BtbVII.adult_whole-fly_site-specific-recombination_insertion_FBgn0263108	ENCSR393QBI	BtbVII	FBgn0263108	adult	whole-fly	NA	whole-fly,site-specific-recombination,insertion	FALSE	FALSE	remap2022_ENCSR393QBI.BtbVII.adult_whole-fly_site-specific-recombination_insertion_FBgn0263108_ENCFF567BJU,remap2022_ENCSR393QBI.BtbVII.adult_whole-fly_site-specific-recombination_insertion_FBgn0263108_ENCFF127TWR,remap2022_ENCSR393QBI.BtbVII.adult_whole-fly_site-specific-recombination_insertion_FBgn0263108_ENCFF248ZAF,remap2022_ENCSR393QBI.BtbVII.adult_whole-fly_site-specific-recombination_inser…
ENCSR393QBI.BtbVII.adult_whole-fly_site-specific-recombination_insertion_FBgn0263108	ENCSR393QBI	BtbVII	FBgn0263108	adult	whole-fly	NA	whole-fly,site-specific-recombination,insertion	FALSE	FALSE	remap2022_ENCSR393QBI.BtbVII.adult_whole-fly_site-specific-recombination_insertion_FBgn0263108_ENCFF567BJU,remap2022_ENCSR393QBI.BtbVII.adult_whole-fly_site-specific-recombination_insertion_FBgn0263108_ENCFF127TWR,remap2022_ENCSR393QBI.BtbVII.adult_whole-fly_site-specific-recombination_insertion_FBgn0263108_ENCFF248ZAF,remap2022_ENCSR393QBI.BtbVII.adult_whole-fly_site-specific-recombination_inser…
ENCSR393QBI.BtbVII.adult_whole-fly_site-specific-recombination_insertion_FBgn0263108	ENCSR393QBI	BtbVII	FBgn0263108	adult	whole-fly	NA	whole-fly,site-specific-recombination,insertion	FALSE	FALSE	remap2022_ENCSR393QBI.BtbVII.adult_whole-fly_site-specific-recombination_insertion_FBgn0263108_ENCFF567BJU,remap2022_ENCSR393QBI.BtbVII.adult_whole-fly_site-specific-recombination_insertion_FBgn0263108_ENCFF127TWR,remap2022_ENCSR393QBI.BtbVII.adult_whole-fly_site-specific-recombination_insertion_FBgn0263108_ENCFF248ZAF,remap2022_ENCSR393QBI.BtbVII.adult_whole-fly_site-specific-recombination_inser…
ENCSR393QBI.BtbVII.adult_whole-fly_site-specific-recombination_insertion_FBgn0263108	ENCSR393QBI	BtbVII	FBgn0263108	adult	whole-fly	NA	whole-fly,site-specific-recombination,insertion	FALSE	FALSE	remap2022_ENCSR393QBI.BtbVII.adult_whole-fly_site-specific-recombination_insertion_FBgn0263108_ENCFF567BJU,remap2022_ENCSR393QBI.BtbVII.adult_whole-fly_site-specific-recombination_insertion_FBgn0263108_ENCFF127TWR,remap2022_ENCSR393QBI.BtbVII.adult_whole-fly_site-specific-recombination_insertion_FBgn0263108_ENCFF248ZAF,remap2022_ENCSR393QBI.BtbVII.adult_whole-fly_site-specific-recombination_inser…
ENCSR393QBI.BtbVII.adult_whole-fly_site-specific-recombination_insertion_FBgn0263108	ENCSR393QBI	BtbVII	FBgn0263108	adult	whole-fly	NA	whole-fly,site-specific-recombination,insertion	FALSE	FALSE	remap2022_ENCSR393QBI.BtbVII.adult_whole-fly_site-specific-recombination_insertion_FBgn0263108_ENCFF567BJU,remap2022_ENCSR393QBI.BtbVII.adult_whole-fly_site-specific-recombination_insertion_FBgn0263108_ENCFF127TWR,remap2022_ENCSR393QBI.BtbVII.adult_whole-fly_site-specific-recombination_insertion_FBgn0263108_ENCFF248ZAF,remap2022_ENCSR393QBI.BtbVII.adult_whole-fly_site-specific-recombination_inser…
ENCSR393QBI.BtbVII.adult_whole-fly_site-specific-recombination_insertion_FBgn0263108	ENCSR393QBI	BtbVII	FBgn0263108	adult	whole-fly	NA	whole-fly,site-specific-recombination,insertion	FALSE	FALSE	remap2022_ENCSR393QBI.BtbVII.adult_whole-fly_site-specific-recombination_insertion_FBgn0263108_ENCFF567BJU,remap2022_ENCSR393QBI.BtbVII.adult_whole-fly_site-specific-recombination_insertion_FBgn0263108_ENCFF127TWR,remap2022_ENCSR393QBI.BtbVII.adult_whole-fly_site-specific-recombination_insertion_FBgn0263108_ENCFF248ZAF,remap2022_ENCSR393QBI.BtbVII.adult_whole-fly_site-specific-recombination_inser…
ENCSR393VQP.Zif.adult_whole-fly_site-specific-recombination_insertion_FBgn0037446	ENCSR393VQP	Zif	FBgn0037446	adult	whole-fly	NA	whole-fly,site-specific-recombination,insertion	FALSE	FALSE	remap2022_ENCSR393VQP.Zif.adult_whole-fly_site-specific-recombination_insertion_FBgn0037446_ENCFF605EVZ,remap2022_ENCSR393VQP.Zif.adult_whole-fly_site-specific-recombination_insertion_FBgn0037446_ENCFF562CHB,remap2022_ENCSR393VQP.Zif.adult_whole-fly_site-specific-recombination_insertion_FBgn0037446_ENCFF245IPH
ENCSR393VQP.Zif.adult_whole-fly_site-specific-recombination_insertion_FBgn0037446	ENCSR393VQP	Zif	FBgn0037446	adult	whole-fly	NA	whole-fly,site-specific-recombination,insertion	FALSE	FALSE	remap2022_ENCSR393VQP.Zif.adult_whole-fly_site-specific-recombination_insertion_FBgn0037446_ENCFF605EVZ,remap2022_ENCSR393VQP.Zif.adult_whole-fly_site-specific-recombination_insertion_FBgn0037446_ENCFF562CHB,remap2022_ENCSR393VQP.Zif.adult_whole-fly_site-specific-recombination_insertion_FBgn0037446_ENCFF245IPH
ENCSR393VQP.Zif.adult_whole-fly_site-specific-recombination_insertion_FBgn0037446	ENCSR393VQP	Zif	FBgn0037446	adult	whole-fly	NA	whole-fly,site-specific-recombination,insertion	FALSE	FALSE	remap2022_ENCSR393VQP.Zif.adult_whole-fly_site-specific-recombination_insertion_FBgn0037446_ENCFF605EVZ,remap2022_ENCSR393VQP.Zif.adult_whole-fly_site-specific-recombination_insertion_FBgn0037446_ENCFF562CHB,remap2022_ENCSR393VQP.Zif.adult_whole-fly_site-specific-recombination_insertion_FBgn0037446_ENCFF245IPH
ENCSR394MHV.unpg.adult_whole-fly_site-specific-recombination_insertion_FBgn0015561	ENCSR394MHV	unpg	FBgn0015561	adult	whole-fly	NA	whole-fly,site-specific-recombination,insertion	FALSE	FALSE	remap2022_ENCSR394MHV.unpg.adult_whole-fly_site-specific-recombination_insertion_FBgn0015561_ENCFF556SDP,remap2022_ENCSR394MHV.unpg.adult_whole-fly_site-specific-recombination_insertion_FBgn0015561_ENCFF407UWD,remap2022_ENCSR394MHV.unpg.adult_whole-fly_site-specific-recombination_insertion_FBgn0015561_ENCFF085HVK,remap2022_ENCSR394MHV.unpg.adult_whole-fly_site-specific-recombination_insertion_FBg…
ENCSR394MHV.unpg.adult_whole-fly_site-specific-recombination_insertion_FBgn0015561	ENCSR394MHV	unpg	FBgn0015561	adult	whole-fly	NA	whole-fly,site-specific-recombination,insertion	FALSE	FALSE	remap2022_ENCSR394MHV.unpg.adult_whole-fly_site-specific-recombination_insertion_FBgn0015561_ENCFF556SDP,remap2022_ENCSR394MHV.unpg.adult_whole-fly_site-specific-recombination_insertion_FBgn0015561_ENCFF407UWD,remap2022_ENCSR394MHV.unpg.adult_whole-fly_site-specific-recombination_insertion_FBgn0015561_ENCFF085HVK,remap2022_ENCSR394MHV.unpg.adult_whole-fly_site-specific-recombination_insertion_FBg…
ENCSR394MHV.unpg.adult_whole-fly_site-specific-recombination_insertion_FBgn0015561	ENCSR394MHV	unpg	FBgn0015561	adult	whole-fly	NA	whole-fly,site-specific-recombination,insertion	FALSE	FALSE	remap2022_ENCSR394MHV.unpg.adult_whole-fly_site-specific-recombination_insertion_FBgn0015561_ENCFF556SDP,remap2022_ENCSR394MHV.unpg.adult_whole-fly_site-specific-recombination_insertion_FBgn0015561_ENCFF407UWD,remap2022_ENCSR394MHV.unpg.adult_whole-fly_site-specific-recombination_insertion_FBgn0015561_ENCFF085HVK,remap2022_ENCSR394MHV.unpg.adult_whole-fly_site-specific-recombination_insertion_FBg…
ENCSR394MHV.unpg.adult_whole-fly_site-specific-recombination_insertion_FBgn0015561	ENCSR394MHV	unpg	FBgn0015561	adult	whole-fly	NA	whole-fly,site-specific-recombination,insertion	FALSE	FALSE	remap2022_ENCSR394MHV.unpg.adult_whole-fly_site-specific-recombination_insertion_FBgn0015561_ENCFF556SDP,remap2022_ENCSR394MHV.unpg.adult_whole-fly_site-specific-recombination_insertion_FBgn0015561_ENCFF407UWD,remap2022_ENCSR394MHV.unpg.adult_whole-fly_site-specific-recombination_insertion_FBgn0015561_ENCFF085HVK,remap2022_ENCSR394MHV.unpg.adult_whole-fly_site-specific-recombination_insertion_FBg…
ENCSR394MHV.unpg.adult_whole-fly_site-specific-recombination_insertion_FBgn0015561	ENCSR394MHV	unpg	FBgn0015561	adult	whole-fly	NA	whole-fly,site-specific-recombination,insertion	FALSE	FALSE	remap2022_ENCSR394MHV.unpg.adult_whole-fly_site-specific-recombination_insertion_FBgn0015561_ENCFF556SDP,remap2022_ENCSR394MHV.unpg.adult_whole-fly_site-specific-recombination_insertion_FBgn0015561_ENCFF407UWD,remap2022_ENCSR394MHV.unpg.adult_whole-fly_site-specific-recombination_insertion_FBgn0015561_ENCFF085HVK,remap2022_ENCSR394MHV.unpg.adult_whole-fly_site-specific-recombination_insertion_FBg…
ENCSR396LMJ.YL-1.adult_whole-fly_site-specific-recombination_insertion_FBgn0032321	ENCSR396LMJ	YL-1	FBgn0032321	adult	whole-fly	NA	whole-fly,site-specific-recombination,insertion	FALSE	FALSE	remap2022_ENCSR396LMJ.YL-1.adult_whole-fly_site-specific-recombination_insertion_FBgn0032321_ENCFF611DBI,remap2022_ENCSR396LMJ.YL-1.adult_whole-fly_site-specific-recombination_insertion_FBgn0032321_ENCFF024WNV,remap2022_ENCSR396LMJ.YL-1.adult_whole-fly_site-specific-recombination_insertion_FBgn0032321_ENCFF577AFL
ENCSR396LMJ.YL-1.adult_whole-fly_site-specific-recombination_insertion_FBgn0032321	ENCSR396LMJ	YL-1	FBgn0032321	adult	whole-fly	NA	whole-fly,site-specific-recombination,insertion	FALSE	FALSE	remap2022_ENCSR396LMJ.YL-1.adult_whole-fly_site-specific-recombination_insertion_FBgn0032321_ENCFF611DBI,remap2022_ENCSR396LMJ.YL-1.adult_whole-fly_site-specific-recombination_insertion_FBgn0032321_ENCFF024WNV,remap2022_ENCSR396LMJ.YL-1.adult_whole-fly_site-specific-recombination_insertion_FBgn0032321_ENCFF577AFL
ENCSR396LMJ.YL-1.adult_whole-fly_site-specific-recombination_insertion_FBgn0032321	ENCSR396LMJ	YL-1	FBgn0032321	adult	whole-fly	NA	whole-fly,site-specific-recombination,insertion	FALSE	FALSE	remap2022_ENCSR396LMJ.YL-1.adult_whole-fly_site-specific-recombination_insertion_FBgn0032321_ENCFF611DBI,remap2022_ENCSR396LMJ.YL-1.adult_whole-fly_site-specific-recombination_insertion_FBgn0032321_ENCFF024WNV,remap2022_ENCSR396LMJ.YL-1.adult_whole-fly_site-specific-recombination_insertion_FBgn0032321_ENCFF577AFL
ENCSR399DAW.net.adult_whole-fly_site-specific-recombination_insertion_FBgn0002931	ENCSR399DAW	net	FBgn0002931	adult	whole-fly	NA	whole-fly,site-specific-recombination,insertion	FALSE	FALSE	remap2022_ENCSR399DAW.net.adult_whole-fly_site-specific-recombination_insertion_FBgn0002931_ENCFF155CWC,remap2022_ENCSR399DAW.net.adult_whole-fly_site-specific-recombination_insertion_FBgn0002931_ENCFF178IAW,remap2022_ENCSR399DAW.net.adult_whole-fly_site-specific-recombination_insertion_FBgn0002931_ENCFF692QXK
ENCSR399DAW.net.adult_whole-fly_site-specific-recombination_insertion_FBgn0002931	ENCSR399DAW	net	FBgn0002931	adult	whole-fly	NA	whole-fly,site-specific-recombination,insertion	FALSE	FALSE	remap2022_ENCSR399DAW.net.adult_whole-fly_site-specific-recombination_insertion_FBgn0002931_ENCFF155CWC,remap2022_ENCSR399DAW.net.adult_whole-fly_site-specific-recombination_insertion_FBgn0002931_ENCFF178IAW,remap2022_ENCSR399DAW.net.adult_whole-fly_site-specific-recombination_insertion_FBgn0002931_ENCFF692QXK
ENCSR399DAW.net.adult_whole-fly_site-specific-recombination_insertion_FBgn0002931	ENCSR399DAW	net	FBgn0002931	adult	whole-fly	NA	whole-fly,site-specific-recombination,insertion	FALSE	FALSE	remap2022_ENCSR399DAW.net.adult_whole-fly_site-specific-recombination_insertion_FBgn0002931_ENCFF155CWC,remap2022_ENCSR399DAW.net.adult_whole-fly_site-specific-recombination_insertion_FBgn0002931_ENCFF178IAW,remap2022_ENCSR399DAW.net.adult_whole-fly_site-specific-recombination_insertion_FBgn0002931_ENCFF692QXK
ENCSR399FPR.ZIPIC.adult_whole-fly_site-specific-recombination_insertion_FBgn0039740	ENCSR399FPR	ZIPIC	FBgn0039740	adult	whole-fly	NA	whole-fly,site-specific-recombination,insertion	FALSE	FALSE	remap2022_ENCSR399FPR.ZIPIC.adult_whole-fly_site-specific-recombination_insertion_FBgn0039740_ENCFF501YME,remap2022_ENCSR399FPR.ZIPIC.adult_whole-fly_site-specific-recombination_insertion_FBgn0039740_ENCFF096KIN
ENCSR399FPR.ZIPIC.adult_whole-fly_site-specific-recombination_insertion_FBgn0039740	ENCSR399FPR	ZIPIC	FBgn0039740	adult	whole-fly	NA	whole-fly,site-specific-recombination,insertion	FALSE	FALSE	remap2022_ENCSR399FPR.ZIPIC.adult_whole-fly_site-specific-recombination_insertion_FBgn0039740_ENCFF501YME,remap2022_ENCSR399FPR.ZIPIC.adult_whole-fly_site-specific-recombination_insertion_FBgn0039740_ENCFF096KIN
ENCSR407MOM.gcm2.adult_whole-fly_site-specific-recombination_insertion_FBgn0019809	ENCSR407MOM	gcm2	FBgn0019809	adult	whole-fly	NA	whole-fly,site-specific-recombination,insertion	FALSE	FALSE	remap2022_ENCSR407MOM.gcm2.adult_whole-fly_site-specific-recombination_insertion_FBgn0019809_ENCFF296SYF,remap2022_ENCSR407MOM.gcm2.adult_whole-fly_site-specific-recombination_insertion_FBgn0019809_ENCFF446FYT
ENCSR407MOM.gcm2.adult_whole-fly_site-specific-recombination_insertion_FBgn0019809	ENCSR407MOM	gcm2	FBgn0019809	adult	whole-fly	NA	whole-fly,site-specific-recombination,insertion	FALSE	FALSE	remap2022_ENCSR407MOM.gcm2.adult_whole-fly_site-specific-recombination_insertion_FBgn0019809_ENCFF296SYF,remap2022_ENCSR407MOM.gcm2.adult_whole-fly_site-specific-recombination_insertion_FBgn0019809_ENCFF446FYT
ENCSR410UOB.Eip75B.adult_whole-fly_site-specific-recombination_insertion_FBgn0000568	ENCSR410UOB	Eip75B	FBgn0000568	adult	whole-fly	NA	whole-fly,site-specific-recombination,insertion	FALSE	FALSE	remap2022_ENCSR410UOB.Eip75B.adult_whole-fly_site-specific-recombination_insertion_FBgn0000568_ENCFF925RSO,remap2022_ENCSR410UOB.Eip75B.adult_whole-fly_site-specific-recombination_insertion_FBgn0000568_ENCFF808OHA,remap2022_ENCSR410UOB.Eip75B.adult_whole-fly_site-specific-recombination_insertion_FBgn0000568_ENCFF432YTP
ENCSR410UOB.Eip75B.adult_whole-fly_site-specific-recombination_insertion_FBgn0000568	ENCSR410UOB	Eip75B	FBgn0000568	adult	whole-fly	NA	whole-fly,site-specific-recombination,insertion	FALSE	FALSE	remap2022_ENCSR410UOB.Eip75B.adult_whole-fly_site-specific-recombination_insertion_FBgn0000568_ENCFF925RSO,remap2022_ENCSR410UOB.Eip75B.adult_whole-fly_site-specific-recombination_insertion_FBgn0000568_ENCFF808OHA,remap2022_ENCSR410UOB.Eip75B.adult_whole-fly_site-specific-recombination_insertion_FBgn0000568_ENCFF432YTP
ENCSR410UOB.Eip75B.adult_whole-fly_site-specific-recombination_insertion_FBgn0000568	ENCSR410UOB	Eip75B	FBgn0000568	adult	whole-fly	NA	whole-fly,site-specific-recombination,insertion	FALSE	FALSE	remap2022_ENCSR410UOB.Eip75B.adult_whole-fly_site-specific-recombination_insertion_FBgn0000568_ENCFF925RSO,remap2022_ENCSR410UOB.Eip75B.adult_whole-fly_site-specific-recombination_insertion_FBgn0000568_ENCFF808OHA,remap2022_ENCSR410UOB.Eip75B.adult_whole-fly_site-specific-recombination_insertion_FBgn0000568_ENCFF432YTP
ENCSR414EAT.gsb-n.adult_whole-fly_site-specific-recombination_insertion_FBgn0001147	ENCSR414EAT	gsb-n	FBgn0001147	adult	whole-fly	NA	whole-fly,site-specific-recombination,insertion	FALSE	FALSE	remap2022_ENCSR414EAT.gsb-n.adult_whole-fly_site-specific-recombination_insertion_FBgn0001147_ENCFF340QBB,remap2022_ENCSR414EAT.gsb-n.adult_whole-fly_site-specific-recombination_insertion_FBgn0001147_ENCFF048VEK,remap2022_ENCSR414EAT.gsb-n.adult_whole-fly_site-specific-recombination_insertion_FBgn0001147_ENCFF374ILG
ENCSR414EAT.gsb-n.adult_whole-fly_site-specific-recombination_insertion_FBgn0001147	ENCSR414EAT	gsb-n	FBgn0001147	adult	whole-fly	NA	whole-fly,site-specific-recombination,insertion	FALSE	FALSE	remap2022_ENCSR414EAT.gsb-n.adult_whole-fly_site-specific-recombination_insertion_FBgn0001147_ENCFF340QBB,remap2022_ENCSR414EAT.gsb-n.adult_whole-fly_site-specific-recombination_insertion_FBgn0001147_ENCFF048VEK,remap2022_ENCSR414EAT.gsb-n.adult_whole-fly_site-specific-recombination_insertion_FBgn0001147_ENCFF374ILG
ENCSR414EAT.gsb-n.adult_whole-fly_site-specific-recombination_insertion_FBgn0001147	ENCSR414EAT	gsb-n	FBgn0001147	adult	whole-fly	NA	whole-fly,site-specific-recombination,insertion	FALSE	FALSE	remap2022_ENCSR414EAT.gsb-n.adult_whole-fly_site-specific-recombination_insertion_FBgn0001147_ENCFF340QBB,remap2022_ENCSR414EAT.gsb-n.adult_whole-fly_site-specific-recombination_insertion_FBgn0001147_ENCFF048VEK,remap2022_ENCSR414EAT.gsb-n.adult_whole-fly_site-specific-recombination_insertion_FBgn0001147_ENCFF374ILG
ENCSR415SZP.sc.adult_whole-fly_FBgn0004170	ENCSR415SZP	sc	FBgn0004170	adult	whole-fly	NA	whole-fly	FALSE	FALSE	remap2022_ENCSR415SZP.sc.adult_whole-fly_FBgn0004170_ENCFF170ACR,remap2022_ENCSR415SZP.sc.adult_whole-fly_FBgn0004170_ENCFF372FJU
ENCSR415SZP.sc.adult_whole-fly_FBgn0004170	ENCSR415SZP	sc	FBgn0004170	adult	whole-fly	NA	whole-fly	FALSE	FALSE	remap2022_ENCSR415SZP.sc.adult_whole-fly_FBgn0004170_ENCFF170ACR,remap2022_ENCSR415SZP.sc.adult_whole-fly_FBgn0004170_ENCFF372FJU
ENCSR416MJQ.da.adult_whole-fly_site-specific-recombination_insertion_FBgn0267821	ENCSR416MJQ	da	FBgn0267821	adult	whole-fly	NA	whole-fly,site-specific-recombination,insertion	FALSE	FALSE	remap2022_ENCSR416MJQ.da.adult_whole-fly_site-specific-recombination_insertion_FBgn0267821_ENCFF303EVV,remap2022_ENCSR416MJQ.da.adult_whole-fly_site-specific-recombination_insertion_FBgn0267821_ENCFF831FKP
ENCSR416MJQ.da.adult_whole-fly_site-specific-recombination_insertion_FBgn0267821	ENCSR416MJQ	da	FBgn0267821	adult	whole-fly	NA	whole-fly,site-specific-recombination,insertion	FALSE	FALSE	remap2022_ENCSR416MJQ.da.adult_whole-fly_site-specific-recombination_insertion_FBgn0267821_ENCFF303EVV,remap2022_ENCSR416MJQ.da.adult_whole-fly_site-specific-recombination_insertion_FBgn0267821_ENCFF831FKP
ENCSR418NNG.Hey.adult_whole-fly_site-specific-recombination_insertion_FBgn0027788	ENCSR418NNG	Hey	FBgn0027788	adult	whole-fly	NA	whole-fly,site-specific-recombination,insertion	FALSE	FALSE	remap2022_ENCSR418NNG.Hey.adult_whole-fly_site-specific-recombination_insertion_FBgn0027788_ENCFF538JKZ,remap2022_ENCSR418NNG.Hey.adult_whole-fly_site-specific-recombination_insertion_FBgn0027788_ENCFF536AMH,remap2022_ENCSR418NNG.Hey.adult_whole-fly_site-specific-recombination_insertion_FBgn0027788_ENCFF363PXU
ENCSR418NNG.Hey.adult_whole-fly_site-specific-recombination_insertion_FBgn0027788	ENCSR418NNG	Hey	FBgn0027788	adult	whole-fly	NA	whole-fly,site-specific-recombination,insertion	FALSE	FALSE	remap2022_ENCSR418NNG.Hey.adult_whole-fly_site-specific-recombination_insertion_FBgn0027788_ENCFF538JKZ,remap2022_ENCSR418NNG.Hey.adult_whole-fly_site-specific-recombination_insertion_FBgn0027788_ENCFF536AMH,remap2022_ENCSR418NNG.Hey.adult_whole-fly_site-specific-recombination_insertion_FBgn0027788_ENCFF363PXU
ENCSR418NNG.Hey.adult_whole-fly_site-specific-recombination_insertion_FBgn0027788	ENCSR418NNG	Hey	FBgn0027788	adult	whole-fly	NA	whole-fly,site-specific-recombination,insertion	FALSE	FALSE	remap2022_ENCSR418NNG.Hey.adult_whole-fly_site-specific-recombination_insertion_FBgn0027788_ENCFF538JKZ,remap2022_ENCSR418NNG.Hey.adult_whole-fly_site-specific-recombination_insertion_FBgn0027788_ENCFF536AMH,remap2022_ENCSR418NNG.Hey.adult_whole-fly_site-specific-recombination_insertion_FBgn0027788_ENCFF363PXU
ENCSR418YJE.CG3919.adult_whole-fly_site-specific-recombination_insertion_FBgn0036423	ENCSR418YJE	CG3919	FBgn0036423	adult	whole-fly	NA	whole-fly,site-specific-recombination,insertion	FALSE	FALSE	remap2022_ENCSR418YJE.CG3919.adult_whole-fly_site-specific-recombination_insertion_FBgn0036423_ENCFF200UEG,remap2022_ENCSR418YJE.CG3919.adult_whole-fly_site-specific-recombination_insertion_FBgn0036423_ENCFF888HJT,remap2022_ENCSR418YJE.CG3919.adult_whole-fly_site-specific-recombination_insertion_FBgn0036423_ENCFF274QQU,remap2022_ENCSR418YJE.CG3919.adult_whole-fly_site-specific-recombination_inser…
ENCSR418YJE.CG3919.adult_whole-fly_site-specific-recombination_insertion_FBgn0036423	ENCSR418YJE	CG3919	FBgn0036423	adult	whole-fly	NA	whole-fly,site-specific-recombination,insertion	FALSE	FALSE	remap2022_ENCSR418YJE.CG3919.adult_whole-fly_site-specific-recombination_insertion_FBgn0036423_ENCFF200UEG,remap2022_ENCSR418YJE.CG3919.adult_whole-fly_site-specific-recombination_insertion_FBgn0036423_ENCFF888HJT,remap2022_ENCSR418YJE.CG3919.adult_whole-fly_site-specific-recombination_insertion_FBgn0036423_ENCFF274QQU,remap2022_ENCSR418YJE.CG3919.adult_whole-fly_site-specific-recombination_inser…
ENCSR418YJE.CG3919.adult_whole-fly_site-specific-recombination_insertion_FBgn0036423	ENCSR418YJE	CG3919	FBgn0036423	adult	whole-fly	NA	whole-fly,site-specific-recombination,insertion	FALSE	FALSE	remap2022_ENCSR418YJE.CG3919.adult_whole-fly_site-specific-recombination_insertion_FBgn0036423_ENCFF200UEG,remap2022_ENCSR418YJE.CG3919.adult_whole-fly_site-specific-recombination_insertion_FBgn0036423_ENCFF888HJT,remap2022_ENCSR418YJE.CG3919.adult_whole-fly_site-specific-recombination_insertion_FBgn0036423_ENCFF274QQU,remap2022_ENCSR418YJE.CG3919.adult_whole-fly_site-specific-recombination_inser…
ENCSR418YJE.CG3919.adult_whole-fly_site-specific-recombination_insertion_FBgn0036423	ENCSR418YJE	CG3919	FBgn0036423	adult	whole-fly	NA	whole-fly,site-specific-recombination,insertion	FALSE	FALSE	remap2022_ENCSR418YJE.CG3919.adult_whole-fly_site-specific-recombination_insertion_FBgn0036423_ENCFF200UEG,remap2022_ENCSR418YJE.CG3919.adult_whole-fly_site-specific-recombination_insertion_FBgn0036423_ENCFF888HJT,remap2022_ENCSR418YJE.CG3919.adult_whole-fly_site-specific-recombination_insertion_FBgn0036423_ENCFF274QQU,remap2022_ENCSR418YJE.CG3919.adult_whole-fly_site-specific-recombination_inser…
ENCSR418YJE.CG3919.adult_whole-fly_site-specific-recombination_insertion_FBgn0036423	ENCSR418YJE	CG3919	FBgn0036423	adult	whole-fly	NA	whole-fly,site-specific-recombination,insertion	FALSE	FALSE	remap2022_ENCSR418YJE.CG3919.adult_whole-fly_site-specific-recombination_insertion_FBgn0036423_ENCFF200UEG,remap2022_ENCSR418YJE.CG3919.adult_whole-fly_site-specific-recombination_insertion_FBgn0036423_ENCFF888HJT,remap2022_ENCSR418YJE.CG3919.adult_whole-fly_site-specific-recombination_insertion_FBgn0036423_ENCFF274QQU,remap2022_ENCSR418YJE.CG3919.adult_whole-fly_site-specific-recombination_inser…
ENCSR418YJE.CG3919.adult_whole-fly_site-specific-recombination_insertion_FBgn0036423	ENCSR418YJE	CG3919	FBgn0036423	adult	whole-fly	NA	whole-fly,site-specific-recombination,insertion	FALSE	FALSE	remap2022_ENCSR418YJE.CG3919.adult_whole-fly_site-specific-recombination_insertion_FBgn0036423_ENCFF200UEG,remap2022_ENCSR418YJE.CG3919.adult_whole-fly_site-specific-recombination_insertion_FBgn0036423_ENCFF888HJT,remap2022_ENCSR418YJE.CG3919.adult_whole-fly_site-specific-recombination_insertion_FBgn0036423_ENCFF274QQU,remap2022_ENCSR418YJE.CG3919.adult_whole-fly_site-specific-recombination_inser…
ENCSR420PGU.Su-var-205.adult_whole-fly_FBgn0003607	ENCSR420PGU	Su-var-205	FBgn0003607	adult	whole-fly	NA	whole-fly	FALSE	FALSE	remap2022_ENCSR420PGU.Su-var-205.adult_whole-fly_FBgn0003607_ENCFF737WCX,remap2022_ENCSR420PGU.Su-var-205.adult_whole-fly_FBgn0003607_ENCFF943TGN
ENCSR420PGU.Su-var-205.adult_whole-fly_FBgn0003607	ENCSR420PGU	Su-var-205	FBgn0003607	adult	whole-fly	NA	whole-fly	FALSE	FALSE	remap2022_ENCSR420PGU.Su-var-205.adult_whole-fly_FBgn0003607_ENCFF737WCX,remap2022_ENCSR420PGU.Su-var-205.adult_whole-fly_FBgn0003607_ENCFF943TGN
ENCSR421ILX.CG10274.adult_whole-fly_site-specific-recombination_insertion_FBgn0035690	ENCSR421ILX	CG10274	FBgn0035690	adult	whole-fly	NA	whole-fly,site-specific-recombination,insertion	FALSE	FALSE	remap2022_ENCSR421ILX.CG10274.adult_whole-fly_site-specific-recombination_insertion_FBgn0035690_ENCFF258UPN,remap2022_ENCSR421ILX.CG10274.adult_whole-fly_site-specific-recombination_insertion_FBgn0035690_ENCFF454MVU,remap2022_ENCSR421ILX.CG10274.adult_whole-fly_site-specific-recombination_insertion_FBgn0035690_ENCFF718JID
ENCSR421ILX.CG10274.adult_whole-fly_site-specific-recombination_insertion_FBgn0035690	ENCSR421ILX	CG10274	FBgn0035690	adult	whole-fly	NA	whole-fly,site-specific-recombination,insertion	FALSE	FALSE	remap2022_ENCSR421ILX.CG10274.adult_whole-fly_site-specific-recombination_insertion_FBgn0035690_ENCFF258UPN,remap2022_ENCSR421ILX.CG10274.adult_whole-fly_site-specific-recombination_insertion_FBgn0035690_ENCFF454MVU,remap2022_ENCSR421ILX.CG10274.adult_whole-fly_site-specific-recombination_insertion_FBgn0035690_ENCFF718JID
ENCSR421ILX.CG10274.adult_whole-fly_site-specific-recombination_insertion_FBgn0035690	ENCSR421ILX	CG10274	FBgn0035690	adult	whole-fly	NA	whole-fly,site-specific-recombination,insertion	FALSE	FALSE	remap2022_ENCSR421ILX.CG10274.adult_whole-fly_site-specific-recombination_insertion_FBgn0035690_ENCFF258UPN,remap2022_ENCSR421ILX.CG10274.adult_whole-fly_site-specific-recombination_insertion_FBgn0035690_ENCFF454MVU,remap2022_ENCSR421ILX.CG10274.adult_whole-fly_site-specific-recombination_insertion_FBgn0035690_ENCFF718JID
ENCSR422OTX.yki.adult_whole-fly_FBgn0034970	ENCSR422OTX	yki	FBgn0034970	adult	whole-fly	NA	whole-fly	FALSE	FALSE	remap2022_ENCSR422OTX.yki.adult_whole-fly_FBgn0034970_ENCFF431HES,remap2022_ENCSR422OTX.yki.adult_whole-fly_FBgn0034970_ENCFF695EWD,remap2022_ENCSR422OTX.yki.adult_whole-fly_FBgn0034970_ENCFF862SCY
ENCSR422OTX.yki.adult_whole-fly_FBgn0034970	ENCSR422OTX	yki	FBgn0034970	adult	whole-fly	NA	whole-fly	FALSE	FALSE	remap2022_ENCSR422OTX.yki.adult_whole-fly_FBgn0034970_ENCFF431HES,remap2022_ENCSR422OTX.yki.adult_whole-fly_FBgn0034970_ENCFF695EWD,remap2022_ENCSR422OTX.yki.adult_whole-fly_FBgn0034970_ENCFF862SCY
ENCSR422OTX.yki.adult_whole-fly_FBgn0034970	ENCSR422OTX	yki	FBgn0034970	adult	whole-fly	NA	whole-fly	FALSE	FALSE	remap2022_ENCSR422OTX.yki.adult_whole-fly_FBgn0034970_ENCFF431HES,remap2022_ENCSR422OTX.yki.adult_whole-fly_FBgn0034970_ENCFF695EWD,remap2022_ENCSR422OTX.yki.adult_whole-fly_FBgn0034970_ENCFF862SCY
ENCSR422PMR.CG33213.adult_whole-fly_site-specific-recombination_insertion_FBgn0053213	ENCSR422PMR	CG33213	FBgn0053213	adult	whole-fly	NA	whole-fly,site-specific-recombination,insertion	FALSE	FALSE	remap2022_ENCSR422PMR.CG33213.adult_whole-fly_site-specific-recombination_insertion_FBgn0053213_ENCFF015VHB,remap2022_ENCSR422PMR.CG33213.adult_whole-fly_site-specific-recombination_insertion_FBgn0053213_ENCFF180ZOG,remap2022_ENCSR422PMR.CG33213.adult_whole-fly_site-specific-recombination_insertion_FBgn0053213_ENCFF181HIO
ENCSR422PMR.CG33213.adult_whole-fly_site-specific-recombination_insertion_FBgn0053213	ENCSR422PMR	CG33213	FBgn0053213	adult	whole-fly	NA	whole-fly,site-specific-recombination,insertion	FALSE	FALSE	remap2022_ENCSR422PMR.CG33213.adult_whole-fly_site-specific-recombination_insertion_FBgn0053213_ENCFF015VHB,remap2022_ENCSR422PMR.CG33213.adult_whole-fly_site-specific-recombination_insertion_FBgn0053213_ENCFF180ZOG,remap2022_ENCSR422PMR.CG33213.adult_whole-fly_site-specific-recombination_insertion_FBgn0053213_ENCFF181HIO
ENCSR422PMR.CG33213.adult_whole-fly_site-specific-recombination_insertion_FBgn0053213	ENCSR422PMR	CG33213	FBgn0053213	adult	whole-fly	NA	whole-fly,site-specific-recombination,insertion	FALSE	FALSE	remap2022_ENCSR422PMR.CG33213.adult_whole-fly_site-specific-recombination_insertion_FBgn0053213_ENCFF015VHB,remap2022_ENCSR422PMR.CG33213.adult_whole-fly_site-specific-recombination_insertion_FBgn0053213_ENCFF180ZOG,remap2022_ENCSR422PMR.CG33213.adult_whole-fly_site-specific-recombination_insertion_FBgn0053213_ENCFF181HIO
ENCSR423GBK.FoxP.adult_whole-fly_site-specific-recombination_insertion_FBgn0262477	ENCSR423GBK	FoxP	FBgn0262477	adult	whole-fly	NA	whole-fly,site-specific-recombination,insertion	FALSE	FALSE	remap2022_ENCSR423GBK.FoxP.adult_whole-fly_site-specific-recombination_insertion_FBgn0262477_ENCFF043OZD,remap2022_ENCSR423GBK.FoxP.adult_whole-fly_site-specific-recombination_insertion_FBgn0262477_ENCFF398IOP,remap2022_ENCSR423GBK.FoxP.adult_whole-fly_site-specific-recombination_insertion_FBgn0262477_ENCFF776STI
ENCSR423GBK.FoxP.adult_whole-fly_site-specific-recombination_insertion_FBgn0262477	ENCSR423GBK	FoxP	FBgn0262477	adult	whole-fly	NA	whole-fly,site-specific-recombination,insertion	FALSE	FALSE	remap2022_ENCSR423GBK.FoxP.adult_whole-fly_site-specific-recombination_insertion_FBgn0262477_ENCFF043OZD,remap2022_ENCSR423GBK.FoxP.adult_whole-fly_site-specific-recombination_insertion_FBgn0262477_ENCFF398IOP,remap2022_ENCSR423GBK.FoxP.adult_whole-fly_site-specific-recombination_insertion_FBgn0262477_ENCFF776STI
ENCSR423GBK.FoxP.adult_whole-fly_site-specific-recombination_insertion_FBgn0262477	ENCSR423GBK	FoxP	FBgn0262477	adult	whole-fly	NA	whole-fly,site-specific-recombination,insertion	FALSE	FALSE	remap2022_ENCSR423GBK.FoxP.adult_whole-fly_site-specific-recombination_insertion_FBgn0262477_ENCFF043OZD,remap2022_ENCSR423GBK.FoxP.adult_whole-fly_site-specific-recombination_insertion_FBgn0262477_ENCFF398IOP,remap2022_ENCSR423GBK.FoxP.adult_whole-fly_site-specific-recombination_insertion_FBgn0262477_ENCFF776STI
ENCSR423NEB.CG14710.adult_whole-fly_site-specific-recombination_insertion_FBgn0037920	ENCSR423NEB	CG14710	FBgn0037920	adult	whole-fly	NA	whole-fly,site-specific-recombination,insertion	FALSE	FALSE	remap2022_ENCSR423NEB.CG14710.adult_whole-fly_site-specific-recombination_insertion_FBgn0037920_ENCFF955CIR,remap2022_ENCSR423NEB.CG14710.adult_whole-fly_site-specific-recombination_insertion_FBgn0037920_ENCFF532ZLP,remap2022_ENCSR423NEB.CG14710.adult_whole-fly_site-specific-recombination_insertion_FBgn0037920_ENCFF464OLC
ENCSR423NEB.CG14710.adult_whole-fly_site-specific-recombination_insertion_FBgn0037920	ENCSR423NEB	CG14710	FBgn0037920	adult	whole-fly	NA	whole-fly,site-specific-recombination,insertion	FALSE	FALSE	remap2022_ENCSR423NEB.CG14710.adult_whole-fly_site-specific-recombination_insertion_FBgn0037920_ENCFF955CIR,remap2022_ENCSR423NEB.CG14710.adult_whole-fly_site-specific-recombination_insertion_FBgn0037920_ENCFF532ZLP,remap2022_ENCSR423NEB.CG14710.adult_whole-fly_site-specific-recombination_insertion_FBgn0037920_ENCFF464OLC
ENCSR423NEB.CG14710.adult_whole-fly_site-specific-recombination_insertion_FBgn0037920	ENCSR423NEB	CG14710	FBgn0037920	adult	whole-fly	NA	whole-fly,site-specific-recombination,insertion	FALSE	FALSE	remap2022_ENCSR423NEB.CG14710.adult_whole-fly_site-specific-recombination_insertion_FBgn0037920_ENCFF955CIR,remap2022_ENCSR423NEB.CG14710.adult_whole-fly_site-specific-recombination_insertion_FBgn0037920_ENCFF532ZLP,remap2022_ENCSR423NEB.CG14710.adult_whole-fly_site-specific-recombination_insertion_FBgn0037920_ENCFF464OLC
ENCSR425SCD.HmgD.adult_whole-fly_site-specific-recombination_insertion_FBgn0004362	ENCSR425SCD	HmgD	FBgn0004362	adult	whole-fly	NA	whole-fly,site-specific-recombination,insertion	FALSE	FALSE	remap2022_ENCSR425SCD.HmgD.adult_whole-fly_site-specific-recombination_insertion_FBgn0004362_ENCFF940BMT,remap2022_ENCSR425SCD.HmgD.adult_whole-fly_site-specific-recombination_insertion_FBgn0004362_ENCFF725XPS,remap2022_ENCSR425SCD.HmgD.adult_whole-fly_site-specific-recombination_insertion_FBgn0004362_ENCFF376BZK
ENCSR425SCD.HmgD.adult_whole-fly_site-specific-recombination_insertion_FBgn0004362	ENCSR425SCD	HmgD	FBgn0004362	adult	whole-fly	NA	whole-fly,site-specific-recombination,insertion	FALSE	FALSE	remap2022_ENCSR425SCD.HmgD.adult_whole-fly_site-specific-recombination_insertion_FBgn0004362_ENCFF940BMT,remap2022_ENCSR425SCD.HmgD.adult_whole-fly_site-specific-recombination_insertion_FBgn0004362_ENCFF725XPS,remap2022_ENCSR425SCD.HmgD.adult_whole-fly_site-specific-recombination_insertion_FBgn0004362_ENCFF376BZK
ENCSR425SCD.HmgD.adult_whole-fly_site-specific-recombination_insertion_FBgn0004362	ENCSR425SCD	HmgD	FBgn0004362	adult	whole-fly	NA	whole-fly,site-specific-recombination,insertion	FALSE	FALSE	remap2022_ENCSR425SCD.HmgD.adult_whole-fly_site-specific-recombination_insertion_FBgn0004362_ENCFF940BMT,remap2022_ENCSR425SCD.HmgD.adult_whole-fly_site-specific-recombination_insertion_FBgn0004362_ENCFF725XPS,remap2022_ENCSR425SCD.HmgD.adult_whole-fly_site-specific-recombination_insertion_FBgn0004362_ENCFF376BZK
ENCSR443MIN.tai.adult_whole-fly_site-specific-recombination_insertion_FBgn0041092	ENCSR443MIN	tai	FBgn0041092	adult	whole-fly	NA	whole-fly,site-specific-recombination,insertion	FALSE	FALSE	remap2022_ENCSR443MIN.tai.adult_whole-fly_site-specific-recombination_insertion_FBgn0041092_ENCFF966JOO,remap2022_ENCSR443MIN.tai.adult_whole-fly_site-specific-recombination_insertion_FBgn0041092_ENCFF706OGR,remap2022_ENCSR443MIN.tai.adult_whole-fly_site-specific-recombination_insertion_FBgn0041092_ENCFF499LQM
ENCSR443MIN.tai.adult_whole-fly_site-specific-recombination_insertion_FBgn0041092	ENCSR443MIN	tai	FBgn0041092	adult	whole-fly	NA	whole-fly,site-specific-recombination,insertion	FALSE	FALSE	remap2022_ENCSR443MIN.tai.adult_whole-fly_site-specific-recombination_insertion_FBgn0041092_ENCFF966JOO,remap2022_ENCSR443MIN.tai.adult_whole-fly_site-specific-recombination_insertion_FBgn0041092_ENCFF706OGR,remap2022_ENCSR443MIN.tai.adult_whole-fly_site-specific-recombination_insertion_FBgn0041092_ENCFF499LQM
ENCSR443MIN.tai.adult_whole-fly_site-specific-recombination_insertion_FBgn0041092	ENCSR443MIN	tai	FBgn0041092	adult	whole-fly	NA	whole-fly,site-specific-recombination,insertion	FALSE	FALSE	remap2022_ENCSR443MIN.tai.adult_whole-fly_site-specific-recombination_insertion_FBgn0041092_ENCFF966JOO,remap2022_ENCSR443MIN.tai.adult_whole-fly_site-specific-recombination_insertion_FBgn0041092_ENCFF706OGR,remap2022_ENCSR443MIN.tai.adult_whole-fly_site-specific-recombination_insertion_FBgn0041092_ENCFF499LQM
ENCSR443NTZ.CG2712.adult_whole-fly_site-specific-recombination_insertion_FBgn0024975	ENCSR443NTZ	CG2712	FBgn0024975	adult	whole-fly	NA	whole-fly,site-specific-recombination,insertion	FALSE	FALSE	remap2022_ENCSR443NTZ.CG2712.adult_whole-fly_site-specific-recombination_insertion_FBgn0024975_ENCFF105GZO,remap2022_ENCSR443NTZ.CG2712.adult_whole-fly_site-specific-recombination_insertion_FBgn0024975_ENCFF095GOH,remap2022_ENCSR443NTZ.CG2712.adult_whole-fly_site-specific-recombination_insertion_FBgn0024975_ENCFF425TUT
ENCSR443NTZ.CG2712.adult_whole-fly_site-specific-recombination_insertion_FBgn0024975	ENCSR443NTZ	CG2712	FBgn0024975	adult	whole-fly	NA	whole-fly,site-specific-recombination,insertion	FALSE	FALSE	remap2022_ENCSR443NTZ.CG2712.adult_whole-fly_site-specific-recombination_insertion_FBgn0024975_ENCFF105GZO,remap2022_ENCSR443NTZ.CG2712.adult_whole-fly_site-specific-recombination_insertion_FBgn0024975_ENCFF095GOH,remap2022_ENCSR443NTZ.CG2712.adult_whole-fly_site-specific-recombination_insertion_FBgn0024975_ENCFF425TUT
ENCSR443NTZ.CG2712.adult_whole-fly_site-specific-recombination_insertion_FBgn0024975	ENCSR443NTZ	CG2712	FBgn0024975	adult	whole-fly	NA	whole-fly,site-specific-recombination,insertion	FALSE	FALSE	remap2022_ENCSR443NTZ.CG2712.adult_whole-fly_site-specific-recombination_insertion_FBgn0024975_ENCFF105GZO,remap2022_ENCSR443NTZ.CG2712.adult_whole-fly_site-specific-recombination_insertion_FBgn0024975_ENCFF095GOH,remap2022_ENCSR443NTZ.CG2712.adult_whole-fly_site-specific-recombination_insertion_FBgn0024975_ENCFF425TUT
ENCSR444JKK.ewg.adult_whole-fly_site-specific-recombination_insertion_FBgn0005427	ENCSR444JKK	ewg	FBgn0005427	adult	whole-fly	NA	whole-fly,site-specific-recombination,insertion	FALSE	FALSE	remap2022_ENCSR444JKK.ewg.adult_whole-fly_site-specific-recombination_insertion_FBgn0005427_ENCFF256XPQ,remap2022_ENCSR444JKK.ewg.adult_whole-fly_site-specific-recombination_insertion_FBgn0005427_ENCFF317AVH,remap2022_ENCSR444JKK.ewg.adult_whole-fly_site-specific-recombination_insertion_FBgn0005427_ENCFF534WXU
ENCSR444JKK.ewg.adult_whole-fly_site-specific-recombination_insertion_FBgn0005427	ENCSR444JKK	ewg	FBgn0005427	adult	whole-fly	NA	whole-fly,site-specific-recombination,insertion	FALSE	FALSE	remap2022_ENCSR444JKK.ewg.adult_whole-fly_site-specific-recombination_insertion_FBgn0005427_ENCFF256XPQ,remap2022_ENCSR444JKK.ewg.adult_whole-fly_site-specific-recombination_insertion_FBgn0005427_ENCFF317AVH,remap2022_ENCSR444JKK.ewg.adult_whole-fly_site-specific-recombination_insertion_FBgn0005427_ENCFF534WXU
ENCSR444JKK.ewg.adult_whole-fly_site-specific-recombination_insertion_FBgn0005427	ENCSR444JKK	ewg	FBgn0005427	adult	whole-fly	NA	whole-fly,site-specific-recombination,insertion	FALSE	FALSE	remap2022_ENCSR444JKK.ewg.adult_whole-fly_site-specific-recombination_insertion_FBgn0005427_ENCFF256XPQ,remap2022_ENCSR444JKK.ewg.adult_whole-fly_site-specific-recombination_insertion_FBgn0005427_ENCFF317AVH,remap2022_ENCSR444JKK.ewg.adult_whole-fly_site-specific-recombination_insertion_FBgn0005427_ENCFF534WXU
ENCSR445WCZ.psq.adult_whole-fly_site-specific-recombination_insertion_FBgn0263102	ENCSR445WCZ	psq	FBgn0263102	adult	whole-fly	NA	whole-fly,site-specific-recombination,insertion	FALSE	FALSE	remap2022_ENCSR445WCZ.psq.adult_whole-fly_site-specific-recombination_insertion_FBgn0263102_ENCFF591MIW,remap2022_ENCSR445WCZ.psq.adult_whole-fly_site-specific-recombination_insertion_FBgn0263102_ENCFF781QEI
ENCSR445WCZ.psq.adult_whole-fly_site-specific-recombination_insertion_FBgn0263102	ENCSR445WCZ	psq	FBgn0263102	adult	whole-fly	NA	whole-fly,site-specific-recombination,insertion	FALSE	FALSE	remap2022_ENCSR445WCZ.psq.adult_whole-fly_site-specific-recombination_insertion_FBgn0263102_ENCFF591MIW,remap2022_ENCSR445WCZ.psq.adult_whole-fly_site-specific-recombination_insertion_FBgn0263102_ENCFF781QEI
ENCSR450HPD.bsh.adult_whole-fly_site-specific-recombination_insertion_FBgn0000529	ENCSR450HPD	bsh	FBgn0000529	adult	whole-fly	NA	whole-fly,site-specific-recombination,insertion	FALSE	FALSE	remap2022_ENCSR450HPD.bsh.adult_whole-fly_site-specific-recombination_insertion_FBgn0000529_ENCFF033NDG,remap2022_ENCSR450HPD.bsh.adult_whole-fly_site-specific-recombination_insertion_FBgn0000529_ENCFF553ZPQ
ENCSR450HPD.bsh.adult_whole-fly_site-specific-recombination_insertion_FBgn0000529	ENCSR450HPD	bsh	FBgn0000529	adult	whole-fly	NA	whole-fly,site-specific-recombination,insertion	FALSE	FALSE	remap2022_ENCSR450HPD.bsh.adult_whole-fly_site-specific-recombination_insertion_FBgn0000529_ENCFF033NDG,remap2022_ENCSR450HPD.bsh.adult_whole-fly_site-specific-recombination_insertion_FBgn0000529_ENCFF553ZPQ
ENCSR450VJF.CG10543.adult_whole-fly_site-specific-recombination_insertion_FBgn0034570	ENCSR450VJF	CG10543	FBgn0034570	adult	whole-fly	NA	whole-fly,site-specific-recombination,insertion	FALSE	FALSE	remap2022_ENCSR450VJF.CG10543.adult_whole-fly_site-specific-recombination_insertion_FBgn0034570_ENCFF445UGJ,remap2022_ENCSR450VJF.CG10543.adult_whole-fly_site-specific-recombination_insertion_FBgn0034570_ENCFF520NQT,remap2022_ENCSR450VJF.CG10543.adult_whole-fly_site-specific-recombination_insertion_FBgn0034570_ENCFF525MLO
ENCSR450VJF.CG10543.adult_whole-fly_site-specific-recombination_insertion_FBgn0034570	ENCSR450VJF	CG10543	FBgn0034570	adult	whole-fly	NA	whole-fly,site-specific-recombination,insertion	FALSE	FALSE	remap2022_ENCSR450VJF.CG10543.adult_whole-fly_site-specific-recombination_insertion_FBgn0034570_ENCFF445UGJ,remap2022_ENCSR450VJF.CG10543.adult_whole-fly_site-specific-recombination_insertion_FBgn0034570_ENCFF520NQT,remap2022_ENCSR450VJF.CG10543.adult_whole-fly_site-specific-recombination_insertion_FBgn0034570_ENCFF525MLO
ENCSR450VJF.CG10543.adult_whole-fly_site-specific-recombination_insertion_FBgn0034570	ENCSR450VJF	CG10543	FBgn0034570	adult	whole-fly	NA	whole-fly,site-specific-recombination,insertion	FALSE	FALSE	remap2022_ENCSR450VJF.CG10543.adult_whole-fly_site-specific-recombination_insertion_FBgn0034570_ENCFF445UGJ,remap2022_ENCSR450VJF.CG10543.adult_whole-fly_site-specific-recombination_insertion_FBgn0034570_ENCFF520NQT,remap2022_ENCSR450VJF.CG10543.adult_whole-fly_site-specific-recombination_insertion_FBgn0034570_ENCFF525MLO
ENCSR453UOF.Pif1B.adult_whole-fly_site-specific-recombination_insertion_FBgn0046874	ENCSR453UOF	Pif1B	FBgn0046874	adult	whole-fly	NA	whole-fly,site-specific-recombination,insertion	FALSE	FALSE	remap2022_ENCSR453UOF.Pif1B.adult_whole-fly_site-specific-recombination_insertion_FBgn0046874_ENCFF217ZLS,remap2022_ENCSR453UOF.Pif1B.adult_whole-fly_site-specific-recombination_insertion_FBgn0046874_ENCFF591XML,remap2022_ENCSR453UOF.Pif1B.adult_whole-fly_site-specific-recombination_insertion_FBgn0046874_ENCFF038HBU
ENCSR453UOF.Pif1B.adult_whole-fly_site-specific-recombination_insertion_FBgn0046874	ENCSR453UOF	Pif1B	FBgn0046874	adult	whole-fly	NA	whole-fly,site-specific-recombination,insertion	FALSE	FALSE	remap2022_ENCSR453UOF.Pif1B.adult_whole-fly_site-specific-recombination_insertion_FBgn0046874_ENCFF217ZLS,remap2022_ENCSR453UOF.Pif1B.adult_whole-fly_site-specific-recombination_insertion_FBgn0046874_ENCFF591XML,remap2022_ENCSR453UOF.Pif1B.adult_whole-fly_site-specific-recombination_insertion_FBgn0046874_ENCFF038HBU
ENCSR453UOF.Pif1B.adult_whole-fly_site-specific-recombination_insertion_FBgn0046874	ENCSR453UOF	Pif1B	FBgn0046874	adult	whole-fly	NA	whole-fly,site-specific-recombination,insertion	FALSE	FALSE	remap2022_ENCSR453UOF.Pif1B.adult_whole-fly_site-specific-recombination_insertion_FBgn0046874_ENCFF217ZLS,remap2022_ENCSR453UOF.Pif1B.adult_whole-fly_site-specific-recombination_insertion_FBgn0046874_ENCFF591XML,remap2022_ENCSR453UOF.Pif1B.adult_whole-fly_site-specific-recombination_insertion_FBgn0046874_ENCFF038HBU
ENCSR455AWG.pan.adult_whole-fly_FBgn0085432	ENCSR455AWG	pan	FBgn0085432	adult	whole-fly	NA	whole-fly	FALSE	FALSE	remap2022_ENCSR455AWG.pan.adult_whole-fly_FBgn0085432_ENCFF155QUD,remap2022_ENCSR455AWG.pan.adult_whole-fly_FBgn0085432_ENCFF572XEZ,remap2022_ENCSR455AWG.pan.adult_whole-fly_FBgn0085432_ENCFF520OCZ
ENCSR455AWG.pan.adult_whole-fly_FBgn0085432	ENCSR455AWG	pan	FBgn0085432	adult	whole-fly	NA	whole-fly	FALSE	FALSE	remap2022_ENCSR455AWG.pan.adult_whole-fly_FBgn0085432_ENCFF155QUD,remap2022_ENCSR455AWG.pan.adult_whole-fly_FBgn0085432_ENCFF572XEZ,remap2022_ENCSR455AWG.pan.adult_whole-fly_FBgn0085432_ENCFF520OCZ
ENCSR455AWG.pan.adult_whole-fly_FBgn0085432	ENCSR455AWG	pan	FBgn0085432	adult	whole-fly	NA	whole-fly	FALSE	FALSE	remap2022_ENCSR455AWG.pan.adult_whole-fly_FBgn0085432_ENCFF155QUD,remap2022_ENCSR455AWG.pan.adult_whole-fly_FBgn0085432_ENCFF572XEZ,remap2022_ENCSR455AWG.pan.adult_whole-fly_FBgn0085432_ENCFF520OCZ
ENCSR456UZW.CG2116.adult_whole-fly_site-specific-recombination_insertion_FBgn0030003	ENCSR456UZW	CG2116	FBgn0030003	adult	whole-fly	NA	whole-fly,site-specific-recombination,insertion	FALSE	FALSE	remap2022_ENCSR456UZW.CG2116.adult_whole-fly_site-specific-recombination_insertion_FBgn0030003_ENCFF386FSE,remap2022_ENCSR456UZW.CG2116.adult_whole-fly_site-specific-recombination_insertion_FBgn0030003_ENCFF678UNA,remap2022_ENCSR456UZW.CG2116.adult_whole-fly_site-specific-recombination_insertion_FBgn0030003_ENCFF826DND
ENCSR456UZW.CG2116.adult_whole-fly_site-specific-recombination_insertion_FBgn0030003	ENCSR456UZW	CG2116	FBgn0030003	adult	whole-fly	NA	whole-fly,site-specific-recombination,insertion	FALSE	FALSE	remap2022_ENCSR456UZW.CG2116.adult_whole-fly_site-specific-recombination_insertion_FBgn0030003_ENCFF386FSE,remap2022_ENCSR456UZW.CG2116.adult_whole-fly_site-specific-recombination_insertion_FBgn0030003_ENCFF678UNA,remap2022_ENCSR456UZW.CG2116.adult_whole-fly_site-specific-recombination_insertion_FBgn0030003_ENCFF826DND
ENCSR456UZW.CG2116.adult_whole-fly_site-specific-recombination_insertion_FBgn0030003	ENCSR456UZW	CG2116	FBgn0030003	adult	whole-fly	NA	whole-fly,site-specific-recombination,insertion	FALSE	FALSE	remap2022_ENCSR456UZW.CG2116.adult_whole-fly_site-specific-recombination_insertion_FBgn0030003_ENCFF386FSE,remap2022_ENCSR456UZW.CG2116.adult_whole-fly_site-specific-recombination_insertion_FBgn0030003_ENCFF678UNA,remap2022_ENCSR456UZW.CG2116.adult_whole-fly_site-specific-recombination_insertion_FBgn0030003_ENCFF826DND
ENCSR459CZO.CG4328.adult_whole-fly_site-specific-recombination_insertion_FBgn0036274	ENCSR459CZO	CG4328	FBgn0036274	adult	whole-fly	NA	whole-fly,site-specific-recombination,insertion	FALSE	FALSE	remap2022_ENCSR459CZO.CG4328.adult_whole-fly_site-specific-recombination_insertion_FBgn0036274_ENCFF036MQP,remap2022_ENCSR459CZO.CG4328.adult_whole-fly_site-specific-recombination_insertion_FBgn0036274_ENCFF930LCH,remap2022_ENCSR459CZO.CG4328.adult_whole-fly_site-specific-recombination_insertion_FBgn0036274_ENCFF949AKD
ENCSR459CZO.CG4328.adult_whole-fly_site-specific-recombination_insertion_FBgn0036274	ENCSR459CZO	CG4328	FBgn0036274	adult	whole-fly	NA	whole-fly,site-specific-recombination,insertion	FALSE	FALSE	remap2022_ENCSR459CZO.CG4328.adult_whole-fly_site-specific-recombination_insertion_FBgn0036274_ENCFF036MQP,remap2022_ENCSR459CZO.CG4328.adult_whole-fly_site-specific-recombination_insertion_FBgn0036274_ENCFF930LCH,remap2022_ENCSR459CZO.CG4328.adult_whole-fly_site-specific-recombination_insertion_FBgn0036274_ENCFF949AKD
ENCSR459CZO.CG4328.adult_whole-fly_site-specific-recombination_insertion_FBgn0036274	ENCSR459CZO	CG4328	FBgn0036274	adult	whole-fly	NA	whole-fly,site-specific-recombination,insertion	FALSE	FALSE	remap2022_ENCSR459CZO.CG4328.adult_whole-fly_site-specific-recombination_insertion_FBgn0036274_ENCFF036MQP,remap2022_ENCSR459CZO.CG4328.adult_whole-fly_site-specific-recombination_insertion_FBgn0036274_ENCFF930LCH,remap2022_ENCSR459CZO.CG4328.adult_whole-fly_site-specific-recombination_insertion_FBgn0036274_ENCFF949AKD
ENCSR460LRT.REPTOR.adult_whole-fly_site-specific-recombination_insertion_FBgn0039209	ENCSR460LRT	REPTOR	FBgn0039209	adult	whole-fly	NA	whole-fly,site-specific-recombination,insertion	FALSE	FALSE	remap2022_ENCSR460LRT.REPTOR.adult_whole-fly_site-specific-recombination_insertion_FBgn0039209_ENCFF028OWL,remap2022_ENCSR460LRT.REPTOR.adult_whole-fly_site-specific-recombination_insertion_FBgn0039209_ENCFF254CRJ
ENCSR460LRT.REPTOR.adult_whole-fly_site-specific-recombination_insertion_FBgn0039209	ENCSR460LRT	REPTOR	FBgn0039209	adult	whole-fly	NA	whole-fly,site-specific-recombination,insertion	FALSE	FALSE	remap2022_ENCSR460LRT.REPTOR.adult_whole-fly_site-specific-recombination_insertion_FBgn0039209_ENCFF028OWL,remap2022_ENCSR460LRT.REPTOR.adult_whole-fly_site-specific-recombination_insertion_FBgn0039209_ENCFF254CRJ
ENCSR461AXL.h.adult_whole-fly_site-specific-recombination_insertion_FBgn0001168	ENCSR461AXL	h	FBgn0001168	adult	whole-fly	NA	whole-fly,site-specific-recombination,insertion	FALSE	FALSE	remap2022_ENCSR461AXL.h.adult_whole-fly_site-specific-recombination_insertion_FBgn0001168_ENCFF630GEQ,remap2022_ENCSR461AXL.h.adult_whole-fly_site-specific-recombination_insertion_FBgn0001168_ENCFF827MQB,remap2022_ENCSR461AXL.h.adult_whole-fly_site-specific-recombination_insertion_FBgn0001168_ENCFF617LGV
ENCSR461AXL.h.adult_whole-fly_site-specific-recombination_insertion_FBgn0001168	ENCSR461AXL	h	FBgn0001168	adult	whole-fly	NA	whole-fly,site-specific-recombination,insertion	FALSE	FALSE	remap2022_ENCSR461AXL.h.adult_whole-fly_site-specific-recombination_insertion_FBgn0001168_ENCFF630GEQ,remap2022_ENCSR461AXL.h.adult_whole-fly_site-specific-recombination_insertion_FBgn0001168_ENCFF827MQB,remap2022_ENCSR461AXL.h.adult_whole-fly_site-specific-recombination_insertion_FBgn0001168_ENCFF617LGV
ENCSR461AXL.h.adult_whole-fly_site-specific-recombination_insertion_FBgn0001168	ENCSR461AXL	h	FBgn0001168	adult	whole-fly	NA	whole-fly,site-specific-recombination,insertion	FALSE	FALSE	remap2022_ENCSR461AXL.h.adult_whole-fly_site-specific-recombination_insertion_FBgn0001168_ENCFF630GEQ,remap2022_ENCSR461AXL.h.adult_whole-fly_site-specific-recombination_insertion_FBgn0001168_ENCFF827MQB,remap2022_ENCSR461AXL.h.adult_whole-fly_site-specific-recombination_insertion_FBgn0001168_ENCFF617LGV
ENCSR465HPZ.Abd-B.adult_whole-fly_site-specific-recombination_insertion_FBgn0000015	ENCSR465HPZ	Abd-B	FBgn0000015	adult	whole-fly	NA	whole-fly,site-specific-recombination,insertion	FALSE	FALSE	remap2022_ENCSR465HPZ.Abd-B.adult_whole-fly_site-specific-recombination_insertion_FBgn0000015_ENCFF969SEG,remap2022_ENCSR465HPZ.Abd-B.adult_whole-fly_site-specific-recombination_insertion_FBgn0000015_ENCFF469WCT
ENCSR465HPZ.Abd-B.adult_whole-fly_site-specific-recombination_insertion_FBgn0000015	ENCSR465HPZ	Abd-B	FBgn0000015	adult	whole-fly	NA	whole-fly,site-specific-recombination,insertion	FALSE	FALSE	remap2022_ENCSR465HPZ.Abd-B.adult_whole-fly_site-specific-recombination_insertion_FBgn0000015_ENCFF969SEG,remap2022_ENCSR465HPZ.Abd-B.adult_whole-fly_site-specific-recombination_insertion_FBgn0000015_ENCFF469WCT
ENCSR469KTM.gem.adult_whole-fly_site-specific-recombination_insertion_FBgn0050011	ENCSR469KTM	gem	FBgn0050011	adult	whole-fly	NA	whole-fly,site-specific-recombination,insertion	FALSE	FALSE	remap2022_ENCSR469KTM.gem.adult_whole-fly_site-specific-recombination_insertion_FBgn0050011_ENCFF294RYL,remap2022_ENCSR469KTM.gem.adult_whole-fly_site-specific-recombination_insertion_FBgn0050011_ENCFF781SQT
ENCSR469KTM.gem.adult_whole-fly_site-specific-recombination_insertion_FBgn0050011	ENCSR469KTM	gem	FBgn0050011	adult	whole-fly	NA	whole-fly,site-specific-recombination,insertion	FALSE	FALSE	remap2022_ENCSR469KTM.gem.adult_whole-fly_site-specific-recombination_insertion_FBgn0050011_ENCFF294RYL,remap2022_ENCSR469KTM.gem.adult_whole-fly_site-specific-recombination_insertion_FBgn0050011_ENCFF781SQT
ENCSR471GSA.Jra.adult_whole-fly_site-specific-recombination_insertion_FBgn0001291	ENCSR471GSA	Jra	FBgn0001291	adult	whole-fly	NA	whole-fly,site-specific-recombination,insertion	FALSE	FALSE	remap2022_ENCSR471GSA.Jra.adult_whole-fly_site-specific-recombination_insertion_FBgn0001291_ENCFF298AHP,remap2022_ENCSR471GSA.Jra.adult_whole-fly_site-specific-recombination_insertion_FBgn0001291_ENCFF888CHA
ENCSR471GSA.Jra.adult_whole-fly_site-specific-recombination_insertion_FBgn0001291	ENCSR471GSA	Jra	FBgn0001291	adult	whole-fly	NA	whole-fly,site-specific-recombination,insertion	FALSE	FALSE	remap2022_ENCSR471GSA.Jra.adult_whole-fly_site-specific-recombination_insertion_FBgn0001291_ENCFF298AHP,remap2022_ENCSR471GSA.Jra.adult_whole-fly_site-specific-recombination_insertion_FBgn0001291_ENCFF888CHA
ENCSR471YQA.Eip78C.adult_whole-fly_site-specific-recombination_insertion_FBgn0004865	ENCSR471YQA	Eip78C	FBgn0004865	adult	whole-fly	NA	whole-fly,site-specific-recombination,insertion	FALSE	FALSE	remap2022_ENCSR471YQA.Eip78C.adult_whole-fly_site-specific-recombination_insertion_FBgn0004865_ENCFF629AOU,remap2022_ENCSR471YQA.Eip78C.adult_whole-fly_site-specific-recombination_insertion_FBgn0004865_ENCFF385CWJ,remap2022_ENCSR471YQA.Eip78C.adult_whole-fly_site-specific-recombination_insertion_FBgn0004865_ENCFF522EPU,remap2022_ENCSR471YQA.Eip78C.adult_whole-fly_site-specific-recombination_inser…
ENCSR471YQA.Eip78C.adult_whole-fly_site-specific-recombination_insertion_FBgn0004865	ENCSR471YQA	Eip78C	FBgn0004865	adult	whole-fly	NA	whole-fly,site-specific-recombination,insertion	FALSE	FALSE	remap2022_ENCSR471YQA.Eip78C.adult_whole-fly_site-specific-recombination_insertion_FBgn0004865_ENCFF629AOU,remap2022_ENCSR471YQA.Eip78C.adult_whole-fly_site-specific-recombination_insertion_FBgn0004865_ENCFF385CWJ,remap2022_ENCSR471YQA.Eip78C.adult_whole-fly_site-specific-recombination_insertion_FBgn0004865_ENCFF522EPU,remap2022_ENCSR471YQA.Eip78C.adult_whole-fly_site-specific-recombination_inser…
ENCSR471YQA.Eip78C.adult_whole-fly_site-specific-recombination_insertion_FBgn0004865	ENCSR471YQA	Eip78C	FBgn0004865	adult	whole-fly	NA	whole-fly,site-specific-recombination,insertion	FALSE	FALSE	remap2022_ENCSR471YQA.Eip78C.adult_whole-fly_site-specific-recombination_insertion_FBgn0004865_ENCFF629AOU,remap2022_ENCSR471YQA.Eip78C.adult_whole-fly_site-specific-recombination_insertion_FBgn0004865_ENCFF385CWJ,remap2022_ENCSR471YQA.Eip78C.adult_whole-fly_site-specific-recombination_insertion_FBgn0004865_ENCFF522EPU,remap2022_ENCSR471YQA.Eip78C.adult_whole-fly_site-specific-recombination_inser…
ENCSR471YQA.Eip78C.adult_whole-fly_site-specific-recombination_insertion_FBgn0004865	ENCSR471YQA	Eip78C	FBgn0004865	adult	whole-fly	NA	whole-fly,site-specific-recombination,insertion	FALSE	FALSE	remap2022_ENCSR471YQA.Eip78C.adult_whole-fly_site-specific-recombination_insertion_FBgn0004865_ENCFF629AOU,remap2022_ENCSR471YQA.Eip78C.adult_whole-fly_site-specific-recombination_insertion_FBgn0004865_ENCFF385CWJ,remap2022_ENCSR471YQA.Eip78C.adult_whole-fly_site-specific-recombination_insertion_FBgn0004865_ENCFF522EPU,remap2022_ENCSR471YQA.Eip78C.adult_whole-fly_site-specific-recombination_inser…
ENCSR472URU.gl.adult_whole-fly_site-specific-recombination_insertion_FBgn0004618	ENCSR472URU	gl	FBgn0004618	adult	whole-fly	NA	whole-fly,site-specific-recombination,insertion	FALSE	FALSE	remap2022_ENCSR472URU.gl.adult_whole-fly_site-specific-recombination_insertion_FBgn0004618_ENCFF571PYK,remap2022_ENCSR472URU.gl.adult_whole-fly_site-specific-recombination_insertion_FBgn0004618_ENCFF493QOA
ENCSR472URU.gl.adult_whole-fly_site-specific-recombination_insertion_FBgn0004618	ENCSR472URU	gl	FBgn0004618	adult	whole-fly	NA	whole-fly,site-specific-recombination,insertion	FALSE	FALSE	remap2022_ENCSR472URU.gl.adult_whole-fly_site-specific-recombination_insertion_FBgn0004618_ENCFF571PYK,remap2022_ENCSR472URU.gl.adult_whole-fly_site-specific-recombination_insertion_FBgn0004618_ENCFF493QOA
ENCSR476LOS.Med.adult_whole-fly_site-specific-recombination_insertion_FBgn0011655	ENCSR476LOS	Med	FBgn0011655	adult	whole-fly	NA	whole-fly,site-specific-recombination,insertion	FALSE	FALSE	remap2022_ENCSR476LOS.Med.adult_whole-fly_site-specific-recombination_insertion_FBgn0011655_ENCFF715HMJ,remap2022_ENCSR476LOS.Med.adult_whole-fly_site-specific-recombination_insertion_FBgn0011655_ENCFF169VLN,remap2022_ENCSR476LOS.Med.adult_whole-fly_site-specific-recombination_insertion_FBgn0011655_ENCFF400LQU,remap2022_ENCSR476LOS.Med.adult_whole-fly_site-specific-recombination_insertion_FBgn001…
ENCSR476LOS.Med.adult_whole-fly_site-specific-recombination_insertion_FBgn0011655	ENCSR476LOS	Med	FBgn0011655	adult	whole-fly	NA	whole-fly,site-specific-recombination,insertion	FALSE	FALSE	remap2022_ENCSR476LOS.Med.adult_whole-fly_site-specific-recombination_insertion_FBgn0011655_ENCFF715HMJ,remap2022_ENCSR476LOS.Med.adult_whole-fly_site-specific-recombination_insertion_FBgn0011655_ENCFF169VLN,remap2022_ENCSR476LOS.Med.adult_whole-fly_site-specific-recombination_insertion_FBgn0011655_ENCFF400LQU,remap2022_ENCSR476LOS.Med.adult_whole-fly_site-specific-recombination_insertion_FBgn001…
ENCSR476LOS.Med.adult_whole-fly_site-specific-recombination_insertion_FBgn0011655	ENCSR476LOS	Med	FBgn0011655	adult	whole-fly	NA	whole-fly,site-specific-recombination,insertion	FALSE	FALSE	remap2022_ENCSR476LOS.Med.adult_whole-fly_site-specific-recombination_insertion_FBgn0011655_ENCFF715HMJ,remap2022_ENCSR476LOS.Med.adult_whole-fly_site-specific-recombination_insertion_FBgn0011655_ENCFF169VLN,remap2022_ENCSR476LOS.Med.adult_whole-fly_site-specific-recombination_insertion_FBgn0011655_ENCFF400LQU,remap2022_ENCSR476LOS.Med.adult_whole-fly_site-specific-recombination_insertion_FBgn001…
ENCSR476LOS.Med.adult_whole-fly_site-specific-recombination_insertion_FBgn0011655	ENCSR476LOS	Med	FBgn0011655	adult	whole-fly	NA	whole-fly,site-specific-recombination,insertion	FALSE	FALSE	remap2022_ENCSR476LOS.Med.adult_whole-fly_site-specific-recombination_insertion_FBgn0011655_ENCFF715HMJ,remap2022_ENCSR476LOS.Med.adult_whole-fly_site-specific-recombination_insertion_FBgn0011655_ENCFF169VLN,remap2022_ENCSR476LOS.Med.adult_whole-fly_site-specific-recombination_insertion_FBgn0011655_ENCFF400LQU,remap2022_ENCSR476LOS.Med.adult_whole-fly_site-specific-recombination_insertion_FBgn001…
ENCSR476LOS.Med.adult_whole-fly_site-specific-recombination_insertion_FBgn0011655	ENCSR476LOS	Med	FBgn0011655	adult	whole-fly	NA	whole-fly,site-specific-recombination,insertion	FALSE	FALSE	remap2022_ENCSR476LOS.Med.adult_whole-fly_site-specific-recombination_insertion_FBgn0011655_ENCFF715HMJ,remap2022_ENCSR476LOS.Med.adult_whole-fly_site-specific-recombination_insertion_FBgn0011655_ENCFF169VLN,remap2022_ENCSR476LOS.Med.adult_whole-fly_site-specific-recombination_insertion_FBgn0011655_ENCFF400LQU,remap2022_ENCSR476LOS.Med.adult_whole-fly_site-specific-recombination_insertion_FBgn001…
ENCSR476TPB.CG13204.adult_whole-fly_site-specific-recombination_insertion_FBgn0033627	ENCSR476TPB	CG13204	FBgn0033627	adult	whole-fly	NA	whole-fly,site-specific-recombination,insertion	FALSE	FALSE	remap2022_ENCSR476TPB.CG13204.adult_whole-fly_site-specific-recombination_insertion_FBgn0033627_ENCFF738THS,remap2022_ENCSR476TPB.CG13204.adult_whole-fly_site-specific-recombination_insertion_FBgn0033627_ENCFF415ILY
ENCSR476TPB.CG13204.adult_whole-fly_site-specific-recombination_insertion_FBgn0033627	ENCSR476TPB	CG13204	FBgn0033627	adult	whole-fly	NA	whole-fly,site-specific-recombination,insertion	FALSE	FALSE	remap2022_ENCSR476TPB.CG13204.adult_whole-fly_site-specific-recombination_insertion_FBgn0033627_ENCFF738THS,remap2022_ENCSR476TPB.CG13204.adult_whole-fly_site-specific-recombination_insertion_FBgn0033627_ENCFF415ILY
ENCSR483VVZ.CG12391.adult_whole-fly_site-specific-recombination_insertion_FBgn0033581	ENCSR483VVZ	CG12391	FBgn0033581	adult	whole-fly	NA	whole-fly,site-specific-recombination,insertion	FALSE	FALSE	remap2022_ENCSR483VVZ.CG12391.adult_whole-fly_site-specific-recombination_insertion_FBgn0033581_ENCFF722UGU,remap2022_ENCSR483VVZ.CG12391.adult_whole-fly_site-specific-recombination_insertion_FBgn0033581_ENCFF098BKE,remap2022_ENCSR483VVZ.CG12391.adult_whole-fly_site-specific-recombination_insertion_FBgn0033581_ENCFF244JIN
ENCSR483VVZ.CG12391.adult_whole-fly_site-specific-recombination_insertion_FBgn0033581	ENCSR483VVZ	CG12391	FBgn0033581	adult	whole-fly	NA	whole-fly,site-specific-recombination,insertion	FALSE	FALSE	remap2022_ENCSR483VVZ.CG12391.adult_whole-fly_site-specific-recombination_insertion_FBgn0033581_ENCFF722UGU,remap2022_ENCSR483VVZ.CG12391.adult_whole-fly_site-specific-recombination_insertion_FBgn0033581_ENCFF098BKE,remap2022_ENCSR483VVZ.CG12391.adult_whole-fly_site-specific-recombination_insertion_FBgn0033581_ENCFF244JIN
ENCSR483VVZ.CG12391.adult_whole-fly_site-specific-recombination_insertion_FBgn0033581	ENCSR483VVZ	CG12391	FBgn0033581	adult	whole-fly	NA	whole-fly,site-specific-recombination,insertion	FALSE	FALSE	remap2022_ENCSR483VVZ.CG12391.adult_whole-fly_site-specific-recombination_insertion_FBgn0033581_ENCFF722UGU,remap2022_ENCSR483VVZ.CG12391.adult_whole-fly_site-specific-recombination_insertion_FBgn0033581_ENCFF098BKE,remap2022_ENCSR483VVZ.CG12391.adult_whole-fly_site-specific-recombination_insertion_FBgn0033581_ENCFF244JIN
ENCSR484YRI.dl.adult_whole-fly_site-specific-recombination_insertion_FBgn0260632	ENCSR484YRI	dl	FBgn0260632	adult	whole-fly	NA	whole-fly,site-specific-recombination,insertion	FALSE	FALSE	remap2022_ENCSR484YRI.dl.adult_whole-fly_site-specific-recombination_insertion_FBgn0260632_ENCFF261RMY,remap2022_ENCSR484YRI.dl.adult_whole-fly_site-specific-recombination_insertion_FBgn0260632_ENCFF717BTC
ENCSR484YRI.dl.adult_whole-fly_site-specific-recombination_insertion_FBgn0260632	ENCSR484YRI	dl	FBgn0260632	adult	whole-fly	NA	whole-fly,site-specific-recombination,insertion	FALSE	FALSE	remap2022_ENCSR484YRI.dl.adult_whole-fly_site-specific-recombination_insertion_FBgn0260632_ENCFF261RMY,remap2022_ENCSR484YRI.dl.adult_whole-fly_site-specific-recombination_insertion_FBgn0260632_ENCFF717BTC
ENCSR484ZCC.CG15269.adult_whole-fly_site-specific-recombination_insertion_FBgn0028878	ENCSR484ZCC	CG15269	FBgn0028878	adult	whole-fly	NA	whole-fly,site-specific-recombination,insertion	FALSE	FALSE	remap2022_ENCSR484ZCC.CG15269.adult_whole-fly_site-specific-recombination_insertion_FBgn0028878_ENCFF655URT,remap2022_ENCSR484ZCC.CG15269.adult_whole-fly_site-specific-recombination_insertion_FBgn0028878_ENCFF216ITG
ENCSR484ZCC.CG15269.adult_whole-fly_site-specific-recombination_insertion_FBgn0028878	ENCSR484ZCC	CG15269	FBgn0028878	adult	whole-fly	NA	whole-fly,site-specific-recombination,insertion	FALSE	FALSE	remap2022_ENCSR484ZCC.CG15269.adult_whole-fly_site-specific-recombination_insertion_FBgn0028878_ENCFF655URT,remap2022_ENCSR484ZCC.CG15269.adult_whole-fly_site-specific-recombination_insertion_FBgn0028878_ENCFF216ITG
ENCSR485SST.Ets97D.adult_whole-fly_site-specific-recombination_insertion_FBgn0004510	ENCSR485SST	Ets97D	FBgn0004510	adult	whole-fly	NA	whole-fly,site-specific-recombination,insertion	FALSE	FALSE	remap2022_ENCSR485SST.Ets97D.adult_whole-fly_site-specific-recombination_insertion_FBgn0004510_ENCFF319NEI,remap2022_ENCSR485SST.Ets97D.adult_whole-fly_site-specific-recombination_insertion_FBgn0004510_ENCFF904XNK,remap2022_ENCSR485SST.Ets97D.adult_whole-fly_site-specific-recombination_insertion_FBgn0004510_ENCFF126QIM
ENCSR485SST.Ets97D.adult_whole-fly_site-specific-recombination_insertion_FBgn0004510	ENCSR485SST	Ets97D	FBgn0004510	adult	whole-fly	NA	whole-fly,site-specific-recombination,insertion	FALSE	FALSE	remap2022_ENCSR485SST.Ets97D.adult_whole-fly_site-specific-recombination_insertion_FBgn0004510_ENCFF319NEI,remap2022_ENCSR485SST.Ets97D.adult_whole-fly_site-specific-recombination_insertion_FBgn0004510_ENCFF904XNK,remap2022_ENCSR485SST.Ets97D.adult_whole-fly_site-specific-recombination_insertion_FBgn0004510_ENCFF126QIM
ENCSR485SST.Ets97D.adult_whole-fly_site-specific-recombination_insertion_FBgn0004510	ENCSR485SST	Ets97D	FBgn0004510	adult	whole-fly	NA	whole-fly,site-specific-recombination,insertion	FALSE	FALSE	remap2022_ENCSR485SST.Ets97D.adult_whole-fly_site-specific-recombination_insertion_FBgn0004510_ENCFF319NEI,remap2022_ENCSR485SST.Ets97D.adult_whole-fly_site-specific-recombination_insertion_FBgn0004510_ENCFF904XNK,remap2022_ENCSR485SST.Ets97D.adult_whole-fly_site-specific-recombination_insertion_FBgn0004510_ENCFF126QIM
ENCSR485XWP.CG1529.adult_whole-fly_site-specific-recombination_insertion_FBgn0031144	ENCSR485XWP	CG1529	FBgn0031144	adult	whole-fly	NA	whole-fly,site-specific-recombination,insertion	FALSE	FALSE	remap2022_ENCSR485XWP.CG1529.adult_whole-fly_site-specific-recombination_insertion_FBgn0031144_ENCFF846BNL,remap2022_ENCSR485XWP.CG1529.adult_whole-fly_site-specific-recombination_insertion_FBgn0031144_ENCFF863BWM,remap2022_ENCSR485XWP.CG1529.adult_whole-fly_site-specific-recombination_insertion_FBgn0031144_ENCFF547WLI
ENCSR485XWP.CG1529.adult_whole-fly_site-specific-recombination_insertion_FBgn0031144	ENCSR485XWP	CG1529	FBgn0031144	adult	whole-fly	NA	whole-fly,site-specific-recombination,insertion	FALSE	FALSE	remap2022_ENCSR485XWP.CG1529.adult_whole-fly_site-specific-recombination_insertion_FBgn0031144_ENCFF846BNL,remap2022_ENCSR485XWP.CG1529.adult_whole-fly_site-specific-recombination_insertion_FBgn0031144_ENCFF863BWM,remap2022_ENCSR485XWP.CG1529.adult_whole-fly_site-specific-recombination_insertion_FBgn0031144_ENCFF547WLI
ENCSR485XWP.CG1529.adult_whole-fly_site-specific-recombination_insertion_FBgn0031144	ENCSR485XWP	CG1529	FBgn0031144	adult	whole-fly	NA	whole-fly,site-specific-recombination,insertion	FALSE	FALSE	remap2022_ENCSR485XWP.CG1529.adult_whole-fly_site-specific-recombination_insertion_FBgn0031144_ENCFF846BNL,remap2022_ENCSR485XWP.CG1529.adult_whole-fly_site-specific-recombination_insertion_FBgn0031144_ENCFF863BWM,remap2022_ENCSR485XWP.CG1529.adult_whole-fly_site-specific-recombination_insertion_FBgn0031144_ENCFF547WLI
ENCSR486EPD.ind.adult_whole-fly_site-specific-recombination_insertion_FBgn0025776	ENCSR486EPD	ind	FBgn0025776	adult	whole-fly	NA	whole-fly,site-specific-recombination,insertion	FALSE	FALSE	remap2022_ENCSR486EPD.ind.adult_whole-fly_site-specific-recombination_insertion_FBgn0025776_ENCFF664KFL,remap2022_ENCSR486EPD.ind.adult_whole-fly_site-specific-recombination_insertion_FBgn0025776_ENCFF751WZN,remap2022_ENCSR486EPD.ind.adult_whole-fly_site-specific-recombination_insertion_FBgn0025776_ENCFF590EEI
ENCSR486EPD.ind.adult_whole-fly_site-specific-recombination_insertion_FBgn0025776	ENCSR486EPD	ind	FBgn0025776	adult	whole-fly	NA	whole-fly,site-specific-recombination,insertion	FALSE	FALSE	remap2022_ENCSR486EPD.ind.adult_whole-fly_site-specific-recombination_insertion_FBgn0025776_ENCFF664KFL,remap2022_ENCSR486EPD.ind.adult_whole-fly_site-specific-recombination_insertion_FBgn0025776_ENCFF751WZN,remap2022_ENCSR486EPD.ind.adult_whole-fly_site-specific-recombination_insertion_FBgn0025776_ENCFF590EEI
ENCSR486EPD.ind.adult_whole-fly_site-specific-recombination_insertion_FBgn0025776	ENCSR486EPD	ind	FBgn0025776	adult	whole-fly	NA	whole-fly,site-specific-recombination,insertion	FALSE	FALSE	remap2022_ENCSR486EPD.ind.adult_whole-fly_site-specific-recombination_insertion_FBgn0025776_ENCFF664KFL,remap2022_ENCSR486EPD.ind.adult_whole-fly_site-specific-recombination_insertion_FBgn0025776_ENCFF751WZN,remap2022_ENCSR486EPD.ind.adult_whole-fly_site-specific-recombination_insertion_FBgn0025776_ENCFF590EEI
ENCSR486EQS.org-1.adult_whole-fly_site-specific-recombination_insertion_FBgn0021767	ENCSR486EQS	org-1	FBgn0021767	adult	whole-fly	NA	whole-fly,site-specific-recombination,insertion	FALSE	FALSE	remap2022_ENCSR486EQS.org-1.adult_whole-fly_site-specific-recombination_insertion_FBgn0021767_ENCFF382IWA,remap2022_ENCSR486EQS.org-1.adult_whole-fly_site-specific-recombination_insertion_FBgn0021767_ENCFF029MCW
ENCSR486EQS.org-1.adult_whole-fly_site-specific-recombination_insertion_FBgn0021767	ENCSR486EQS	org-1	FBgn0021767	adult	whole-fly	NA	whole-fly,site-specific-recombination,insertion	FALSE	FALSE	remap2022_ENCSR486EQS.org-1.adult_whole-fly_site-specific-recombination_insertion_FBgn0021767_ENCFF382IWA,remap2022_ENCSR486EQS.org-1.adult_whole-fly_site-specific-recombination_insertion_FBgn0021767_ENCFF029MCW
ENCSR486MQI.CG11398.adult_whole-fly_site-specific-recombination_insertion_FBgn0040366	ENCSR486MQI	CG11398	FBgn0040366	adult	whole-fly	NA	whole-fly,site-specific-recombination,insertion	FALSE	FALSE	remap2022_ENCSR486MQI.CG11398.adult_whole-fly_site-specific-recombination_insertion_FBgn0040366_ENCFF739YSW,remap2022_ENCSR486MQI.CG11398.adult_whole-fly_site-specific-recombination_insertion_FBgn0040366_ENCFF813BAF
ENCSR486MQI.CG11398.adult_whole-fly_site-specific-recombination_insertion_FBgn0040366	ENCSR486MQI	CG11398	FBgn0040366	adult	whole-fly	NA	whole-fly,site-specific-recombination,insertion	FALSE	FALSE	remap2022_ENCSR486MQI.CG11398.adult_whole-fly_site-specific-recombination_insertion_FBgn0040366_ENCFF739YSW,remap2022_ENCSR486MQI.CG11398.adult_whole-fly_site-specific-recombination_insertion_FBgn0040366_ENCFF813BAF
ENCSR488NXW.lov.adult_whole-fly_FBgn0266129	ENCSR488NXW	lov	FBgn0266129	adult	whole-fly	NA	whole-fly	FALSE	FALSE	remap2022_ENCSR488NXW.lov.adult_whole-fly_FBgn0266129_ENCFF880MKO,remap2022_ENCSR488NXW.lov.adult_whole-fly_FBgn0266129_ENCFF435MOI
ENCSR488NXW.lov.adult_whole-fly_FBgn0266129	ENCSR488NXW	lov	FBgn0266129	adult	whole-fly	NA	whole-fly	FALSE	FALSE	remap2022_ENCSR488NXW.lov.adult_whole-fly_FBgn0266129_ENCFF880MKO,remap2022_ENCSR488NXW.lov.adult_whole-fly_FBgn0266129_ENCFF435MOI
ENCSR492FKR.Blimp-1.adult_whole-fly_site-specific-recombination_insertion_FBgn0035625	ENCSR492FKR	Blimp-1	FBgn0035625	adult	whole-fly	NA	whole-fly,site-specific-recombination,insertion	FALSE	FALSE	remap2022_ENCSR492FKR.Blimp-1.adult_whole-fly_site-specific-recombination_insertion_FBgn0035625_ENCFF648IVP,remap2022_ENCSR492FKR.Blimp-1.adult_whole-fly_site-specific-recombination_insertion_FBgn0035625_ENCFF734HSX,remap2022_ENCSR492FKR.Blimp-1.adult_whole-fly_site-specific-recombination_insertion_FBgn0035625_ENCFF483KZF
ENCSR492FKR.Blimp-1.adult_whole-fly_site-specific-recombination_insertion_FBgn0035625	ENCSR492FKR	Blimp-1	FBgn0035625	adult	whole-fly	NA	whole-fly,site-specific-recombination,insertion	FALSE	FALSE	remap2022_ENCSR492FKR.Blimp-1.adult_whole-fly_site-specific-recombination_insertion_FBgn0035625_ENCFF648IVP,remap2022_ENCSR492FKR.Blimp-1.adult_whole-fly_site-specific-recombination_insertion_FBgn0035625_ENCFF734HSX,remap2022_ENCSR492FKR.Blimp-1.adult_whole-fly_site-specific-recombination_insertion_FBgn0035625_ENCFF483KZF
ENCSR492FKR.Blimp-1.adult_whole-fly_site-specific-recombination_insertion_FBgn0035625	ENCSR492FKR	Blimp-1	FBgn0035625	adult	whole-fly	NA	whole-fly,site-specific-recombination,insertion	FALSE	FALSE	remap2022_ENCSR492FKR.Blimp-1.adult_whole-fly_site-specific-recombination_insertion_FBgn0035625_ENCFF648IVP,remap2022_ENCSR492FKR.Blimp-1.adult_whole-fly_site-specific-recombination_insertion_FBgn0035625_ENCFF734HSX,remap2022_ENCSR492FKR.Blimp-1.adult_whole-fly_site-specific-recombination_insertion_FBgn0035625_ENCFF483KZF
ENCSR492KRE.insv.adult_whole-fly_site-specific-recombination_insertion_FBgn0031434	ENCSR492KRE	insv	FBgn0031434	adult	whole-fly	NA	whole-fly,site-specific-recombination,insertion	FALSE	FALSE	remap2022_ENCSR492KRE.insv.adult_whole-fly_site-specific-recombination_insertion_FBgn0031434_ENCFF634EMX,remap2022_ENCSR492KRE.insv.adult_whole-fly_site-specific-recombination_insertion_FBgn0031434_ENCFF657STG,remap2022_ENCSR492KRE.insv.adult_whole-fly_site-specific-recombination_insertion_FBgn0031434_ENCFF490LWN
ENCSR492KRE.insv.adult_whole-fly_site-specific-recombination_insertion_FBgn0031434	ENCSR492KRE	insv	FBgn0031434	adult	whole-fly	NA	whole-fly,site-specific-recombination,insertion	FALSE	FALSE	remap2022_ENCSR492KRE.insv.adult_whole-fly_site-specific-recombination_insertion_FBgn0031434_ENCFF634EMX,remap2022_ENCSR492KRE.insv.adult_whole-fly_site-specific-recombination_insertion_FBgn0031434_ENCFF657STG,remap2022_ENCSR492KRE.insv.adult_whole-fly_site-specific-recombination_insertion_FBgn0031434_ENCFF490LWN
ENCSR492KRE.insv.adult_whole-fly_site-specific-recombination_insertion_FBgn0031434	ENCSR492KRE	insv	FBgn0031434	adult	whole-fly	NA	whole-fly,site-specific-recombination,insertion	FALSE	FALSE	remap2022_ENCSR492KRE.insv.adult_whole-fly_site-specific-recombination_insertion_FBgn0031434_ENCFF634EMX,remap2022_ENCSR492KRE.insv.adult_whole-fly_site-specific-recombination_insertion_FBgn0031434_ENCFF657STG,remap2022_ENCSR492KRE.insv.adult_whole-fly_site-specific-recombination_insertion_FBgn0031434_ENCFF490LWN
ENCSR493LWV.Hmx.adult_whole-fly_site-specific-recombination_insertion_FBgn0264005	ENCSR493LWV	Hmx	FBgn0264005	adult	whole-fly	NA	whole-fly,site-specific-recombination,insertion	FALSE	FALSE	remap2022_ENCSR493LWV.Hmx.adult_whole-fly_site-specific-recombination_insertion_FBgn0264005_ENCFF179YZD,remap2022_ENCSR493LWV.Hmx.adult_whole-fly_site-specific-recombination_insertion_FBgn0264005_ENCFF311CJT
ENCSR493LWV.Hmx.adult_whole-fly_site-specific-recombination_insertion_FBgn0264005	ENCSR493LWV	Hmx	FBgn0264005	adult	whole-fly	NA	whole-fly,site-specific-recombination,insertion	FALSE	FALSE	remap2022_ENCSR493LWV.Hmx.adult_whole-fly_site-specific-recombination_insertion_FBgn0264005_ENCFF179YZD,remap2022_ENCSR493LWV.Hmx.adult_whole-fly_site-specific-recombination_insertion_FBgn0264005_ENCFF311CJT
ENCSR494UZY.Stat92E.adult_whole-fly_insertion_FBgn0016917	ENCSR494UZY	Stat92E	FBgn0016917	adult	whole-fly	NA	whole-fly,insertion	FALSE	FALSE	remap2022_ENCSR494UZY.Stat92E.adult_whole-fly_insertion_FBgn0016917_ENCFF199LTY,remap2022_ENCSR494UZY.Stat92E.adult_whole-fly_insertion_FBgn0016917_ENCFF052DLA
ENCSR494UZY.Stat92E.adult_whole-fly_insertion_FBgn0016917	ENCSR494UZY	Stat92E	FBgn0016917	adult	whole-fly	NA	whole-fly,insertion	FALSE	FALSE	remap2022_ENCSR494UZY.Stat92E.adult_whole-fly_insertion_FBgn0016917_ENCFF199LTY,remap2022_ENCSR494UZY.Stat92E.adult_whole-fly_insertion_FBgn0016917_ENCFF052DLA
ENCSR497FYG.EcR.adult_whole-fly_insertion_FBgn0000546	ENCSR497FYG	EcR	FBgn0000546	adult	whole-fly	NA	whole-fly,insertion	FALSE	FALSE	remap2022_ENCSR497FYG.EcR.adult_whole-fly_insertion_FBgn0000546_ENCFF597DCI,remap2022_ENCSR497FYG.EcR.adult_whole-fly_insertion_FBgn0000546_ENCFF235QDC,remap2022_ENCSR497FYG.EcR.adult_whole-fly_insertion_FBgn0000546_ENCFF581DGB
ENCSR497FYG.EcR.adult_whole-fly_insertion_FBgn0000546	ENCSR497FYG	EcR	FBgn0000546	adult	whole-fly	NA	whole-fly,insertion	FALSE	FALSE	remap2022_ENCSR497FYG.EcR.adult_whole-fly_insertion_FBgn0000546_ENCFF597DCI,remap2022_ENCSR497FYG.EcR.adult_whole-fly_insertion_FBgn0000546_ENCFF235QDC,remap2022_ENCSR497FYG.EcR.adult_whole-fly_insertion_FBgn0000546_ENCFF581DGB
ENCSR497FYG.EcR.adult_whole-fly_insertion_FBgn0000546	ENCSR497FYG	EcR	FBgn0000546	adult	whole-fly	NA	whole-fly,insertion	FALSE	FALSE	remap2022_ENCSR497FYG.EcR.adult_whole-fly_insertion_FBgn0000546_ENCFF597DCI,remap2022_ENCSR497FYG.EcR.adult_whole-fly_insertion_FBgn0000546_ENCFF235QDC,remap2022_ENCSR497FYG.EcR.adult_whole-fly_insertion_FBgn0000546_ENCFF581DGB
ENCSR498KAT.fd102C.adult_whole-fly_site-specific-recombination_insertion_FBgn0039937	ENCSR498KAT	fd102C	FBgn0039937	adult	whole-fly	NA	whole-fly,site-specific-recombination,insertion	FALSE	FALSE	remap2022_ENCSR498KAT.fd102C.adult_whole-fly_site-specific-recombination_insertion_FBgn0039937_ENCFF756UES,remap2022_ENCSR498KAT.fd102C.adult_whole-fly_site-specific-recombination_insertion_FBgn0039937_ENCFF719PXW
ENCSR498KAT.fd102C.adult_whole-fly_site-specific-recombination_insertion_FBgn0039937	ENCSR498KAT	fd102C	FBgn0039937	adult	whole-fly	NA	whole-fly,site-specific-recombination,insertion	FALSE	FALSE	remap2022_ENCSR498KAT.fd102C.adult_whole-fly_site-specific-recombination_insertion_FBgn0039937_ENCFF756UES,remap2022_ENCSR498KAT.fd102C.adult_whole-fly_site-specific-recombination_insertion_FBgn0039937_ENCFF719PXW
ENCSR502JHR.tup.adult_whole-fly_site-specific-recombination_insertion_FBgn0003896	ENCSR502JHR	tup	FBgn0003896	adult	whole-fly	NA	whole-fly,site-specific-recombination,insertion	FALSE	FALSE	remap2022_ENCSR502JHR.tup.adult_whole-fly_site-specific-recombination_insertion_FBgn0003896_ENCFF936FOF,remap2022_ENCSR502JHR.tup.adult_whole-fly_site-specific-recombination_insertion_FBgn0003896_ENCFF672ZLH
ENCSR502JHR.tup.adult_whole-fly_site-specific-recombination_insertion_FBgn0003896	ENCSR502JHR	tup	FBgn0003896	adult	whole-fly	NA	whole-fly,site-specific-recombination,insertion	FALSE	FALSE	remap2022_ENCSR502JHR.tup.adult_whole-fly_site-specific-recombination_insertion_FBgn0003896_ENCFF936FOF,remap2022_ENCSR502JHR.tup.adult_whole-fly_site-specific-recombination_insertion_FBgn0003896_ENCFF672ZLH
ENCSR504AYW.Bdp1.adult_whole-fly_site-specific-recombination_insertion_FBgn0032512	ENCSR504AYW	Bdp1	FBgn0032512	adult	whole-fly	NA	whole-fly,site-specific-recombination,insertion	FALSE	FALSE	remap2022_ENCSR504AYW.Bdp1.adult_whole-fly_site-specific-recombination_insertion_FBgn0032512_ENCFF587RCD,remap2022_ENCSR504AYW.Bdp1.adult_whole-fly_site-specific-recombination_insertion_FBgn0032512_ENCFF287NJX,remap2022_ENCSR504AYW.Bdp1.adult_whole-fly_site-specific-recombination_insertion_FBgn0032512_ENCFF171TBF
ENCSR504AYW.Bdp1.adult_whole-fly_site-specific-recombination_insertion_FBgn0032512	ENCSR504AYW	Bdp1	FBgn0032512	adult	whole-fly	NA	whole-fly,site-specific-recombination,insertion	FALSE	FALSE	remap2022_ENCSR504AYW.Bdp1.adult_whole-fly_site-specific-recombination_insertion_FBgn0032512_ENCFF587RCD,remap2022_ENCSR504AYW.Bdp1.adult_whole-fly_site-specific-recombination_insertion_FBgn0032512_ENCFF287NJX,remap2022_ENCSR504AYW.Bdp1.adult_whole-fly_site-specific-recombination_insertion_FBgn0032512_ENCFF171TBF
ENCSR504AYW.Bdp1.adult_whole-fly_site-specific-recombination_insertion_FBgn0032512	ENCSR504AYW	Bdp1	FBgn0032512	adult	whole-fly	NA	whole-fly,site-specific-recombination,insertion	FALSE	FALSE	remap2022_ENCSR504AYW.Bdp1.adult_whole-fly_site-specific-recombination_insertion_FBgn0032512_ENCFF587RCD,remap2022_ENCSR504AYW.Bdp1.adult_whole-fly_site-specific-recombination_insertion_FBgn0032512_ENCFF287NJX,remap2022_ENCSR504AYW.Bdp1.adult_whole-fly_site-specific-recombination_insertion_FBgn0032512_ENCFF171TBF
ENCSR504JFN.eyg.adult_whole-fly_site-specific-recombination_insertion_FBgn0000625	ENCSR504JFN	eyg	FBgn0000625	adult	whole-fly	NA	whole-fly,site-specific-recombination,insertion	FALSE	FALSE	remap2022_ENCSR504JFN.eyg.adult_whole-fly_site-specific-recombination_insertion_FBgn0000625_ENCFF906ONR,remap2022_ENCSR504JFN.eyg.adult_whole-fly_site-specific-recombination_insertion_FBgn0000625_ENCFF598QYG,remap2022_ENCSR504JFN.eyg.adult_whole-fly_site-specific-recombination_insertion_FBgn0000625_ENCFF301OTD
ENCSR504JFN.eyg.adult_whole-fly_site-specific-recombination_insertion_FBgn0000625	ENCSR504JFN	eyg	FBgn0000625	adult	whole-fly	NA	whole-fly,site-specific-recombination,insertion	FALSE	FALSE	remap2022_ENCSR504JFN.eyg.adult_whole-fly_site-specific-recombination_insertion_FBgn0000625_ENCFF906ONR,remap2022_ENCSR504JFN.eyg.adult_whole-fly_site-specific-recombination_insertion_FBgn0000625_ENCFF598QYG,remap2022_ENCSR504JFN.eyg.adult_whole-fly_site-specific-recombination_insertion_FBgn0000625_ENCFF301OTD
ENCSR504JFN.eyg.adult_whole-fly_site-specific-recombination_insertion_FBgn0000625	ENCSR504JFN	eyg	FBgn0000625	adult	whole-fly	NA	whole-fly,site-specific-recombination,insertion	FALSE	FALSE	remap2022_ENCSR504JFN.eyg.adult_whole-fly_site-specific-recombination_insertion_FBgn0000625_ENCFF906ONR,remap2022_ENCSR504JFN.eyg.adult_whole-fly_site-specific-recombination_insertion_FBgn0000625_ENCFF598QYG,remap2022_ENCSR504JFN.eyg.adult_whole-fly_site-specific-recombination_insertion_FBgn0000625_ENCFF301OTD
ENCSR504XNN.cnc.adult_whole-fly_FBgn0262975	ENCSR504XNN	cnc	FBgn0262975	adult	whole-fly	NA	whole-fly	FALSE	FALSE	remap2022_ENCSR504XNN.cnc.adult_whole-fly_FBgn0262975_ENCFF057EIK,remap2022_ENCSR504XNN.cnc.adult_whole-fly_FBgn0262975_ENCFF748XKL
ENCSR504XNN.cnc.adult_whole-fly_FBgn0262975	ENCSR504XNN	cnc	FBgn0262975	adult	whole-fly	NA	whole-fly	FALSE	FALSE	remap2022_ENCSR504XNN.cnc.adult_whole-fly_FBgn0262975_ENCFF057EIK,remap2022_ENCSR504XNN.cnc.adult_whole-fly_FBgn0262975_ENCFF748XKL
ENCSR505XFU.her.adult_whole-fly_site-specific-recombination_insertion_FBgn0001185	ENCSR505XFU	her	FBgn0001185	adult	whole-fly	NA	whole-fly,site-specific-recombination,insertion	FALSE	FALSE	remap2022_ENCSR505XFU.her.adult_whole-fly_site-specific-recombination_insertion_FBgn0001185_ENCFF836TXE,remap2022_ENCSR505XFU.her.adult_whole-fly_site-specific-recombination_insertion_FBgn0001185_ENCFF696RVT
ENCSR505XFU.her.adult_whole-fly_site-specific-recombination_insertion_FBgn0001185	ENCSR505XFU	her	FBgn0001185	adult	whole-fly	NA	whole-fly,site-specific-recombination,insertion	FALSE	FALSE	remap2022_ENCSR505XFU.her.adult_whole-fly_site-specific-recombination_insertion_FBgn0001185_ENCFF836TXE,remap2022_ENCSR505XFU.her.adult_whole-fly_site-specific-recombination_insertion_FBgn0001185_ENCFF696RVT
ENCSR507PVB.CG17568.adult_whole-fly_site-specific-recombination_insertion_FBgn0032763	ENCSR507PVB	CG17568	FBgn0032763	adult	whole-fly	NA	whole-fly,site-specific-recombination,insertion	FALSE	FALSE	remap2022_ENCSR507PVB.CG17568.adult_whole-fly_site-specific-recombination_insertion_FBgn0032763_ENCFF639IHW,remap2022_ENCSR507PVB.CG17568.adult_whole-fly_site-specific-recombination_insertion_FBgn0032763_ENCFF481XJE
ENCSR507PVB.CG17568.adult_whole-fly_site-specific-recombination_insertion_FBgn0032763	ENCSR507PVB	CG17568	FBgn0032763	adult	whole-fly	NA	whole-fly,site-specific-recombination,insertion	FALSE	FALSE	remap2022_ENCSR507PVB.CG17568.adult_whole-fly_site-specific-recombination_insertion_FBgn0032763_ENCFF639IHW,remap2022_ENCSR507PVB.CG17568.adult_whole-fly_site-specific-recombination_insertion_FBgn0032763_ENCFF481XJE
ENCSR515HRX.CG18011.adult_whole-fly_site-specific-recombination_insertion_FBgn0033491	ENCSR515HRX	CG18011	FBgn0033491	adult	whole-fly	NA	whole-fly,site-specific-recombination,insertion	FALSE	FALSE	remap2022_ENCSR515HRX.CG18011.adult_whole-fly_site-specific-recombination_insertion_FBgn0033491_ENCFF808PMN,remap2022_ENCSR515HRX.CG18011.adult_whole-fly_site-specific-recombination_insertion_FBgn0033491_ENCFF042UKR,remap2022_ENCSR515HRX.CG18011.adult_whole-fly_site-specific-recombination_insertion_FBgn0033491_ENCFF933EEH
ENCSR515HRX.CG18011.adult_whole-fly_site-specific-recombination_insertion_FBgn0033491	ENCSR515HRX	CG18011	FBgn0033491	adult	whole-fly	NA	whole-fly,site-specific-recombination,insertion	FALSE	FALSE	remap2022_ENCSR515HRX.CG18011.adult_whole-fly_site-specific-recombination_insertion_FBgn0033491_ENCFF808PMN,remap2022_ENCSR515HRX.CG18011.adult_whole-fly_site-specific-recombination_insertion_FBgn0033491_ENCFF042UKR,remap2022_ENCSR515HRX.CG18011.adult_whole-fly_site-specific-recombination_insertion_FBgn0033491_ENCFF933EEH
ENCSR515HRX.CG18011.adult_whole-fly_site-specific-recombination_insertion_FBgn0033491	ENCSR515HRX	CG18011	FBgn0033491	adult	whole-fly	NA	whole-fly,site-specific-recombination,insertion	FALSE	FALSE	remap2022_ENCSR515HRX.CG18011.adult_whole-fly_site-specific-recombination_insertion_FBgn0033491_ENCFF808PMN,remap2022_ENCSR515HRX.CG18011.adult_whole-fly_site-specific-recombination_insertion_FBgn0033491_ENCFF042UKR,remap2022_ENCSR515HRX.CG18011.adult_whole-fly_site-specific-recombination_insertion_FBgn0033491_ENCFF933EEH
ENCSR517HVR.Mes4.adult_whole-fly_site-specific-recombination_insertion_FBgn0034726	ENCSR517HVR	Mes4	FBgn0034726	adult	whole-fly	NA	whole-fly,site-specific-recombination,insertion	FALSE	FALSE	remap2022_ENCSR517HVR.Mes4.adult_whole-fly_site-specific-recombination_insertion_FBgn0034726_ENCFF350OLU,remap2022_ENCSR517HVR.Mes4.adult_whole-fly_site-specific-recombination_insertion_FBgn0034726_ENCFF049ZEX
ENCSR517HVR.Mes4.adult_whole-fly_site-specific-recombination_insertion_FBgn0034726	ENCSR517HVR	Mes4	FBgn0034726	adult	whole-fly	NA	whole-fly,site-specific-recombination,insertion	FALSE	FALSE	remap2022_ENCSR517HVR.Mes4.adult_whole-fly_site-specific-recombination_insertion_FBgn0034726_ENCFF350OLU,remap2022_ENCSR517HVR.Mes4.adult_whole-fly_site-specific-recombination_insertion_FBgn0034726_ENCFF049ZEX
ENCSR517LBX.M1BP.adult_whole-fly_site-specific-recombination_insertion_FBgn0037621	ENCSR517LBX	M1BP	FBgn0037621	adult	whole-fly	NA	whole-fly,site-specific-recombination,insertion	FALSE	FALSE	remap2022_ENCSR517LBX.M1BP.adult_whole-fly_site-specific-recombination_insertion_FBgn0037621_ENCFF090ZCB,remap2022_ENCSR517LBX.M1BP.adult_whole-fly_site-specific-recombination_insertion_FBgn0037621_ENCFF398BUH,remap2022_ENCSR517LBX.M1BP.adult_whole-fly_site-specific-recombination_insertion_FBgn0037621_ENCFF529FTA
ENCSR517LBX.M1BP.adult_whole-fly_site-specific-recombination_insertion_FBgn0037621	ENCSR517LBX	M1BP	FBgn0037621	adult	whole-fly	NA	whole-fly,site-specific-recombination,insertion	FALSE	FALSE	remap2022_ENCSR517LBX.M1BP.adult_whole-fly_site-specific-recombination_insertion_FBgn0037621_ENCFF090ZCB,remap2022_ENCSR517LBX.M1BP.adult_whole-fly_site-specific-recombination_insertion_FBgn0037621_ENCFF398BUH,remap2022_ENCSR517LBX.M1BP.adult_whole-fly_site-specific-recombination_insertion_FBgn0037621_ENCFF529FTA
ENCSR517LBX.M1BP.adult_whole-fly_site-specific-recombination_insertion_FBgn0037621	ENCSR517LBX	M1BP	FBgn0037621	adult	whole-fly	NA	whole-fly,site-specific-recombination,insertion	FALSE	FALSE	remap2022_ENCSR517LBX.M1BP.adult_whole-fly_site-specific-recombination_insertion_FBgn0037621_ENCFF090ZCB,remap2022_ENCSR517LBX.M1BP.adult_whole-fly_site-specific-recombination_insertion_FBgn0037621_ENCFF398BUH,remap2022_ENCSR517LBX.M1BP.adult_whole-fly_site-specific-recombination_insertion_FBgn0037621_ENCFF529FTA
ENCSR518FUJ.pdm3.adult_whole-fly_site-specific-recombination_insertion_FBgn0261588	ENCSR518FUJ	pdm3	FBgn0261588	adult	whole-fly	NA	whole-fly,site-specific-recombination,insertion	FALSE	FALSE	remap2022_ENCSR518FUJ.pdm3.adult_whole-fly_site-specific-recombination_insertion_FBgn0261588_ENCFF011ASS,remap2022_ENCSR518FUJ.pdm3.adult_whole-fly_site-specific-recombination_insertion_FBgn0261588_ENCFF138LOX,remap2022_ENCSR518FUJ.pdm3.adult_whole-fly_site-specific-recombination_insertion_FBgn0261588_ENCFF464JIA
ENCSR518FUJ.pdm3.adult_whole-fly_site-specific-recombination_insertion_FBgn0261588	ENCSR518FUJ	pdm3	FBgn0261588	adult	whole-fly	NA	whole-fly,site-specific-recombination,insertion	FALSE	FALSE	remap2022_ENCSR518FUJ.pdm3.adult_whole-fly_site-specific-recombination_insertion_FBgn0261588_ENCFF011ASS,remap2022_ENCSR518FUJ.pdm3.adult_whole-fly_site-specific-recombination_insertion_FBgn0261588_ENCFF138LOX,remap2022_ENCSR518FUJ.pdm3.adult_whole-fly_site-specific-recombination_insertion_FBgn0261588_ENCFF464JIA
ENCSR518FUJ.pdm3.adult_whole-fly_site-specific-recombination_insertion_FBgn0261588	ENCSR518FUJ	pdm3	FBgn0261588	adult	whole-fly	NA	whole-fly,site-specific-recombination,insertion	FALSE	FALSE	remap2022_ENCSR518FUJ.pdm3.adult_whole-fly_site-specific-recombination_insertion_FBgn0261588_ENCFF011ASS,remap2022_ENCSR518FUJ.pdm3.adult_whole-fly_site-specific-recombination_insertion_FBgn0261588_ENCFF138LOX,remap2022_ENCSR518FUJ.pdm3.adult_whole-fly_site-specific-recombination_insertion_FBgn0261588_ENCFF464JIA
ENCSR518MQL.Hnf4.adult_whole-fly_site-specific-recombination_insertion_FBgn0004914	ENCSR518MQL	Hnf4	FBgn0004914	adult	whole-fly	NA	whole-fly,site-specific-recombination,insertion	FALSE	FALSE	remap2022_ENCSR518MQL.Hnf4.adult_whole-fly_site-specific-recombination_insertion_FBgn0004914_ENCFF017XLR,remap2022_ENCSR518MQL.Hnf4.adult_whole-fly_site-specific-recombination_insertion_FBgn0004914_ENCFF602IWX
ENCSR518MQL.Hnf4.adult_whole-fly_site-specific-recombination_insertion_FBgn0004914	ENCSR518MQL	Hnf4	FBgn0004914	adult	whole-fly	NA	whole-fly,site-specific-recombination,insertion	FALSE	FALSE	remap2022_ENCSR518MQL.Hnf4.adult_whole-fly_site-specific-recombination_insertion_FBgn0004914_ENCFF017XLR,remap2022_ENCSR518MQL.Hnf4.adult_whole-fly_site-specific-recombination_insertion_FBgn0004914_ENCFF602IWX
ENCSR519DDL.CG6683.adult_whole-fly_site-specific-recombination_insertion_FBgn0035902	ENCSR519DDL	CG6683	FBgn0035902	adult	whole-fly	NA	whole-fly,site-specific-recombination,insertion	FALSE	FALSE	remap2022_ENCSR519DDL.CG6683.adult_whole-fly_site-specific-recombination_insertion_FBgn0035902_ENCFF309YWC,remap2022_ENCSR519DDL.CG6683.adult_whole-fly_site-specific-recombination_insertion_FBgn0035902_ENCFF152UUZ
ENCSR519DDL.CG6683.adult_whole-fly_site-specific-recombination_insertion_FBgn0035902	ENCSR519DDL	CG6683	FBgn0035902	adult	whole-fly	NA	whole-fly,site-specific-recombination,insertion	FALSE	FALSE	remap2022_ENCSR519DDL.CG6683.adult_whole-fly_site-specific-recombination_insertion_FBgn0035902_ENCFF309YWC,remap2022_ENCSR519DDL.CG6683.adult_whole-fly_site-specific-recombination_insertion_FBgn0035902_ENCFF152UUZ
ENCSR521GRU.prd.adult_whole-fly_FBgn0003145	ENCSR521GRU	prd	FBgn0003145	adult	whole-fly	NA	whole-fly	FALSE	FALSE	remap2022_ENCSR521GRU.prd.adult_whole-fly_FBgn0003145_ENCFF848UIP,remap2022_ENCSR521GRU.prd.adult_whole-fly_FBgn0003145_ENCFF793HNG
ENCSR521GRU.prd.adult_whole-fly_FBgn0003145	ENCSR521GRU	prd	FBgn0003145	adult	whole-fly	NA	whole-fly	FALSE	FALSE	remap2022_ENCSR521GRU.prd.adult_whole-fly_FBgn0003145_ENCFF848UIP,remap2022_ENCSR521GRU.prd.adult_whole-fly_FBgn0003145_ENCFF793HNG
ENCSR521NPD.CG12071.adult_whole-fly_site-specific-recombination_insertion_FBgn0039808	ENCSR521NPD	CG12071	FBgn0039808	adult	whole-fly	NA	whole-fly,site-specific-recombination,insertion	FALSE	FALSE	remap2022_ENCSR521NPD.CG12071.adult_whole-fly_site-specific-recombination_insertion_FBgn0039808_ENCFF266PXX,remap2022_ENCSR521NPD.CG12071.adult_whole-fly_site-specific-recombination_insertion_FBgn0039808_ENCFF634UAH,remap2022_ENCSR521NPD.CG12071.adult_whole-fly_site-specific-recombination_insertion_FBgn0039808_ENCFF681QIG
ENCSR521NPD.CG12071.adult_whole-fly_site-specific-recombination_insertion_FBgn0039808	ENCSR521NPD	CG12071	FBgn0039808	adult	whole-fly	NA	whole-fly,site-specific-recombination,insertion	FALSE	FALSE	remap2022_ENCSR521NPD.CG12071.adult_whole-fly_site-specific-recombination_insertion_FBgn0039808_ENCFF266PXX,remap2022_ENCSR521NPD.CG12071.adult_whole-fly_site-specific-recombination_insertion_FBgn0039808_ENCFF634UAH,remap2022_ENCSR521NPD.CG12071.adult_whole-fly_site-specific-recombination_insertion_FBgn0039808_ENCFF681QIG
ENCSR521NPD.CG12071.adult_whole-fly_site-specific-recombination_insertion_FBgn0039808	ENCSR521NPD	CG12071	FBgn0039808	adult	whole-fly	NA	whole-fly,site-specific-recombination,insertion	FALSE	FALSE	remap2022_ENCSR521NPD.CG12071.adult_whole-fly_site-specific-recombination_insertion_FBgn0039808_ENCFF266PXX,remap2022_ENCSR521NPD.CG12071.adult_whole-fly_site-specific-recombination_insertion_FBgn0039808_ENCFF634UAH,remap2022_ENCSR521NPD.CG12071.adult_whole-fly_site-specific-recombination_insertion_FBgn0039808_ENCFF681QIG
ENCSR522NJB.repo.adult_whole-fly_site-specific-recombination_insertion_FBgn0011701	ENCSR522NJB	repo	FBgn0011701	adult	whole-fly	NA	whole-fly,site-specific-recombination,insertion	FALSE	FALSE	remap2022_ENCSR522NJB.repo.adult_whole-fly_site-specific-recombination_insertion_FBgn0011701_ENCFF578CME,remap2022_ENCSR522NJB.repo.adult_whole-fly_site-specific-recombination_insertion_FBgn0011701_ENCFF153ZBF
ENCSR522NJB.repo.adult_whole-fly_site-specific-recombination_insertion_FBgn0011701	ENCSR522NJB	repo	FBgn0011701	adult	whole-fly	NA	whole-fly,site-specific-recombination,insertion	FALSE	FALSE	remap2022_ENCSR522NJB.repo.adult_whole-fly_site-specific-recombination_insertion_FBgn0011701_ENCFF578CME,remap2022_ENCSR522NJB.repo.adult_whole-fly_site-specific-recombination_insertion_FBgn0011701_ENCFF153ZBF
ENCSR530BVF.CG5180.adult_whole-fly_site-specific-recombination_insertion_FBgn0043457	ENCSR530BVF	CG5180	FBgn0043457	adult	whole-fly	NA	whole-fly,site-specific-recombination,insertion	FALSE	FALSE	remap2022_ENCSR530BVF.CG5180.adult_whole-fly_site-specific-recombination_insertion_FBgn0043457_ENCFF297QQA,remap2022_ENCSR530BVF.CG5180.adult_whole-fly_site-specific-recombination_insertion_FBgn0043457_ENCFF499FVW,remap2022_ENCSR530BVF.CG5180.adult_whole-fly_site-specific-recombination_insertion_FBgn0043457_ENCFF832USB
ENCSR530BVF.CG5180.adult_whole-fly_site-specific-recombination_insertion_FBgn0043457	ENCSR530BVF	CG5180	FBgn0043457	adult	whole-fly	NA	whole-fly,site-specific-recombination,insertion	FALSE	FALSE	remap2022_ENCSR530BVF.CG5180.adult_whole-fly_site-specific-recombination_insertion_FBgn0043457_ENCFF297QQA,remap2022_ENCSR530BVF.CG5180.adult_whole-fly_site-specific-recombination_insertion_FBgn0043457_ENCFF499FVW,remap2022_ENCSR530BVF.CG5180.adult_whole-fly_site-specific-recombination_insertion_FBgn0043457_ENCFF832USB
ENCSR530BVF.CG5180.adult_whole-fly_site-specific-recombination_insertion_FBgn0043457	ENCSR530BVF	CG5180	FBgn0043457	adult	whole-fly	NA	whole-fly,site-specific-recombination,insertion	FALSE	FALSE	remap2022_ENCSR530BVF.CG5180.adult_whole-fly_site-specific-recombination_insertion_FBgn0043457_ENCFF297QQA,remap2022_ENCSR530BVF.CG5180.adult_whole-fly_site-specific-recombination_insertion_FBgn0043457_ENCFF499FVW,remap2022_ENCSR530BVF.CG5180.adult_whole-fly_site-specific-recombination_insertion_FBgn0043457_ENCFF832USB
ENCSR530MRJ.CG8319.adult_whole-fly_site-specific-recombination_insertion_FBgn0037722	ENCSR530MRJ	CG8319	FBgn0037722	adult	whole-fly	NA	whole-fly,site-specific-recombination,insertion	FALSE	FALSE	remap2022_ENCSR530MRJ.CG8319.adult_whole-fly_site-specific-recombination_insertion_FBgn0037722_ENCFF251ESE,remap2022_ENCSR530MRJ.CG8319.adult_whole-fly_site-specific-recombination_insertion_FBgn0037722_ENCFF837XPO,remap2022_ENCSR530MRJ.CG8319.adult_whole-fly_site-specific-recombination_insertion_FBgn0037722_ENCFF336EDQ
ENCSR530MRJ.CG8319.adult_whole-fly_site-specific-recombination_insertion_FBgn0037722	ENCSR530MRJ	CG8319	FBgn0037722	adult	whole-fly	NA	whole-fly,site-specific-recombination,insertion	FALSE	FALSE	remap2022_ENCSR530MRJ.CG8319.adult_whole-fly_site-specific-recombination_insertion_FBgn0037722_ENCFF251ESE,remap2022_ENCSR530MRJ.CG8319.adult_whole-fly_site-specific-recombination_insertion_FBgn0037722_ENCFF837XPO,remap2022_ENCSR530MRJ.CG8319.adult_whole-fly_site-specific-recombination_insertion_FBgn0037722_ENCFF336EDQ
ENCSR530MRJ.CG8319.adult_whole-fly_site-specific-recombination_insertion_FBgn0037722	ENCSR530MRJ	CG8319	FBgn0037722	adult	whole-fly	NA	whole-fly,site-specific-recombination,insertion	FALSE	FALSE	remap2022_ENCSR530MRJ.CG8319.adult_whole-fly_site-specific-recombination_insertion_FBgn0037722_ENCFF251ESE,remap2022_ENCSR530MRJ.CG8319.adult_whole-fly_site-specific-recombination_insertion_FBgn0037722_ENCFF837XPO,remap2022_ENCSR530MRJ.CG8319.adult_whole-fly_site-specific-recombination_insertion_FBgn0037722_ENCFF336EDQ
ENCSR532BHA.CrebB.adult_whole-fly_site-specific-recombination_insertion_FBgn0265784	ENCSR532BHA	CrebB	FBgn0265784	adult	whole-fly	NA	whole-fly,site-specific-recombination,insertion	FALSE	FALSE	remap2022_ENCSR532BHA.CrebB.adult_whole-fly_site-specific-recombination_insertion_FBgn0265784_ENCFF576ADQ,remap2022_ENCSR532BHA.CrebB.adult_whole-fly_site-specific-recombination_insertion_FBgn0265784_ENCFF112LEM,remap2022_ENCSR532BHA.CrebB.adult_whole-fly_site-specific-recombination_insertion_FBgn0265784_ENCFF543QST
ENCSR532BHA.CrebB.adult_whole-fly_site-specific-recombination_insertion_FBgn0265784	ENCSR532BHA	CrebB	FBgn0265784	adult	whole-fly	NA	whole-fly,site-specific-recombination,insertion	FALSE	FALSE	remap2022_ENCSR532BHA.CrebB.adult_whole-fly_site-specific-recombination_insertion_FBgn0265784_ENCFF576ADQ,remap2022_ENCSR532BHA.CrebB.adult_whole-fly_site-specific-recombination_insertion_FBgn0265784_ENCFF112LEM,remap2022_ENCSR532BHA.CrebB.adult_whole-fly_site-specific-recombination_insertion_FBgn0265784_ENCFF543QST
ENCSR532BHA.CrebB.adult_whole-fly_site-specific-recombination_insertion_FBgn0265784	ENCSR532BHA	CrebB	FBgn0265784	adult	whole-fly	NA	whole-fly,site-specific-recombination,insertion	FALSE	FALSE	remap2022_ENCSR532BHA.CrebB.adult_whole-fly_site-specific-recombination_insertion_FBgn0265784_ENCFF576ADQ,remap2022_ENCSR532BHA.CrebB.adult_whole-fly_site-specific-recombination_insertion_FBgn0265784_ENCFF112LEM,remap2022_ENCSR532BHA.CrebB.adult_whole-fly_site-specific-recombination_insertion_FBgn0265784_ENCFF543QST
ENCSR532YPP.disco-r.adult_whole-fly_site-specific-recombination_insertion_FBgn0285879	ENCSR532YPP	disco-r	FBgn0285879	adult	whole-fly	NA	whole-fly,site-specific-recombination,insertion	FALSE	FALSE	remap2022_ENCSR532YPP.disco-r.adult_whole-fly_site-specific-recombination_insertion_FBgn0285879_ENCFF658EPB,remap2022_ENCSR532YPP.disco-r.adult_whole-fly_site-specific-recombination_insertion_FBgn0285879_ENCFF121YMW
ENCSR532YPP.disco-r.adult_whole-fly_site-specific-recombination_insertion_FBgn0285879	ENCSR532YPP	disco-r	FBgn0285879	adult	whole-fly	NA	whole-fly,site-specific-recombination,insertion	FALSE	FALSE	remap2022_ENCSR532YPP.disco-r.adult_whole-fly_site-specific-recombination_insertion_FBgn0285879_ENCFF658EPB,remap2022_ENCSR532YPP.disco-r.adult_whole-fly_site-specific-recombination_insertion_FBgn0285879_ENCFF121YMW
ENCSR533CXT.BEAF-32.adult_whole-fly_site-specific-recombination_insertion_FBgn0015602	ENCSR533CXT	BEAF-32	FBgn0015602	adult	whole-fly	NA	whole-fly,site-specific-recombination,insertion	FALSE	FALSE	remap2022_ENCSR533CXT.BEAF-32.adult_whole-fly_site-specific-recombination_insertion_FBgn0015602_ENCFF401NEA,remap2022_ENCSR533CXT.BEAF-32.adult_whole-fly_site-specific-recombination_insertion_FBgn0015602_ENCFF096DEO,remap2022_ENCSR533CXT.BEAF-32.adult_whole-fly_site-specific-recombination_insertion_FBgn0015602_ENCFF394GTJ
ENCSR533CXT.BEAF-32.adult_whole-fly_site-specific-recombination_insertion_FBgn0015602	ENCSR533CXT	BEAF-32	FBgn0015602	adult	whole-fly	NA	whole-fly,site-specific-recombination,insertion	FALSE	FALSE	remap2022_ENCSR533CXT.BEAF-32.adult_whole-fly_site-specific-recombination_insertion_FBgn0015602_ENCFF401NEA,remap2022_ENCSR533CXT.BEAF-32.adult_whole-fly_site-specific-recombination_insertion_FBgn0015602_ENCFF096DEO,remap2022_ENCSR533CXT.BEAF-32.adult_whole-fly_site-specific-recombination_insertion_FBgn0015602_ENCFF394GTJ
ENCSR533CXT.BEAF-32.adult_whole-fly_site-specific-recombination_insertion_FBgn0015602	ENCSR533CXT	BEAF-32	FBgn0015602	adult	whole-fly	NA	whole-fly,site-specific-recombination,insertion	FALSE	FALSE	remap2022_ENCSR533CXT.BEAF-32.adult_whole-fly_site-specific-recombination_insertion_FBgn0015602_ENCFF401NEA,remap2022_ENCSR533CXT.BEAF-32.adult_whole-fly_site-specific-recombination_insertion_FBgn0015602_ENCFF096DEO,remap2022_ENCSR533CXT.BEAF-32.adult_whole-fly_site-specific-recombination_insertion_FBgn0015602_ENCFF394GTJ
ENCSR547IVT.Dek.adult_whole-fly_site-specific-recombination_insertion_FBgn0026533	ENCSR547IVT	Dek	FBgn0026533	adult	whole-fly	NA	whole-fly,site-specific-recombination,insertion	FALSE	FALSE	remap2022_ENCSR547IVT.Dek.adult_whole-fly_site-specific-recombination_insertion_FBgn0026533_ENCFF048KFZ,remap2022_ENCSR547IVT.Dek.adult_whole-fly_site-specific-recombination_insertion_FBgn0026533_ENCFF331HKB,remap2022_ENCSR547IVT.Dek.adult_whole-fly_site-specific-recombination_insertion_FBgn0026533_ENCFF478DER
ENCSR547IVT.Dek.adult_whole-fly_site-specific-recombination_insertion_FBgn0026533	ENCSR547IVT	Dek	FBgn0026533	adult	whole-fly	NA	whole-fly,site-specific-recombination,insertion	FALSE	FALSE	remap2022_ENCSR547IVT.Dek.adult_whole-fly_site-specific-recombination_insertion_FBgn0026533_ENCFF048KFZ,remap2022_ENCSR547IVT.Dek.adult_whole-fly_site-specific-recombination_insertion_FBgn0026533_ENCFF331HKB,remap2022_ENCSR547IVT.Dek.adult_whole-fly_site-specific-recombination_insertion_FBgn0026533_ENCFF478DER
ENCSR547IVT.Dek.adult_whole-fly_site-specific-recombination_insertion_FBgn0026533	ENCSR547IVT	Dek	FBgn0026533	adult	whole-fly	NA	whole-fly,site-specific-recombination,insertion	FALSE	FALSE	remap2022_ENCSR547IVT.Dek.adult_whole-fly_site-specific-recombination_insertion_FBgn0026533_ENCFF048KFZ,remap2022_ENCSR547IVT.Dek.adult_whole-fly_site-specific-recombination_insertion_FBgn0026533_ENCFF331HKB,remap2022_ENCSR547IVT.Dek.adult_whole-fly_site-specific-recombination_insertion_FBgn0026533_ENCFF478DER
ENCSR547SRP.Eip74EF.adult_whole-fly_insertion_FBgn0000567	ENCSR547SRP	Eip74EF	FBgn0000567	adult	whole-fly	NA	whole-fly,insertion	FALSE	FALSE	remap2022_ENCSR547SRP.Eip74EF.adult_whole-fly_insertion_FBgn0000567_ENCFF247SSW,remap2022_ENCSR547SRP.Eip74EF.adult_whole-fly_insertion_FBgn0000567_ENCFF076OFZ
ENCSR547SRP.Eip74EF.adult_whole-fly_insertion_FBgn0000567	ENCSR547SRP	Eip74EF	FBgn0000567	adult	whole-fly	NA	whole-fly,insertion	FALSE	FALSE	remap2022_ENCSR547SRP.Eip74EF.adult_whole-fly_insertion_FBgn0000567_ENCFF247SSW,remap2022_ENCSR547SRP.Eip74EF.adult_whole-fly_insertion_FBgn0000567_ENCFF076OFZ
ENCSR548EHZ.foxo.adult_whole-fly_site-specific-recombination_insertion_FBgn0038197	ENCSR548EHZ	foxo	FBgn0038197	adult	whole-fly	NA	whole-fly,site-specific-recombination,insertion	FALSE	FALSE	remap2022_ENCSR548EHZ.foxo.adult_whole-fly_site-specific-recombination_insertion_FBgn0038197_ENCFF014ZWS,remap2022_ENCSR548EHZ.foxo.adult_whole-fly_site-specific-recombination_insertion_FBgn0038197_ENCFF899XPB
ENCSR548EHZ.foxo.adult_whole-fly_site-specific-recombination_insertion_FBgn0038197	ENCSR548EHZ	foxo	FBgn0038197	adult	whole-fly	NA	whole-fly,site-specific-recombination,insertion	FALSE	FALSE	remap2022_ENCSR548EHZ.foxo.adult_whole-fly_site-specific-recombination_insertion_FBgn0038197_ENCFF014ZWS,remap2022_ENCSR548EHZ.foxo.adult_whole-fly_site-specific-recombination_insertion_FBgn0038197_ENCFF899XPB
ENCSR550SQH.eve.adult_whole-fly_site-specific-recombination_insertion_FBgn0000606	ENCSR550SQH	eve	FBgn0000606	adult	whole-fly	NA	whole-fly,site-specific-recombination,insertion	FALSE	FALSE	remap2022_ENCSR550SQH.eve.adult_whole-fly_site-specific-recombination_insertion_FBgn0000606_ENCFF668DNV,remap2022_ENCSR550SQH.eve.adult_whole-fly_site-specific-recombination_insertion_FBgn0000606_ENCFF601MEL
ENCSR550SQH.eve.adult_whole-fly_site-specific-recombination_insertion_FBgn0000606	ENCSR550SQH	eve	FBgn0000606	adult	whole-fly	NA	whole-fly,site-specific-recombination,insertion	FALSE	FALSE	remap2022_ENCSR550SQH.eve.adult_whole-fly_site-specific-recombination_insertion_FBgn0000606_ENCFF668DNV,remap2022_ENCSR550SQH.eve.adult_whole-fly_site-specific-recombination_insertion_FBgn0000606_ENCFF601MEL
ENCSR551HEY.CG8388.adult_whole-fly_site-specific-recombination_insertion_FBgn0034062	ENCSR551HEY	CG8388	FBgn0034062	adult	whole-fly	NA	whole-fly,site-specific-recombination,insertion	FALSE	FALSE	remap2022_ENCSR551HEY.CG8388.adult_whole-fly_site-specific-recombination_insertion_FBgn0034062_ENCFF778QDO,remap2022_ENCSR551HEY.CG8388.adult_whole-fly_site-specific-recombination_insertion_FBgn0034062_ENCFF748VFS
ENCSR551HEY.CG8388.adult_whole-fly_site-specific-recombination_insertion_FBgn0034062	ENCSR551HEY	CG8388	FBgn0034062	adult	whole-fly	NA	whole-fly,site-specific-recombination,insertion	FALSE	FALSE	remap2022_ENCSR551HEY.CG8388.adult_whole-fly_site-specific-recombination_insertion_FBgn0034062_ENCFF778QDO,remap2022_ENCSR551HEY.CG8388.adult_whole-fly_site-specific-recombination_insertion_FBgn0034062_ENCFF748VFS
ENCSR551YOZ.CG1620.adult_whole-fly_site-specific-recombination_insertion_FBgn0033183	ENCSR551YOZ	CG1620	FBgn0033183	adult	whole-fly	NA	whole-fly,site-specific-recombination,insertion	FALSE	FALSE	remap2022_ENCSR551YOZ.CG1620.adult_whole-fly_site-specific-recombination_insertion_FBgn0033183_ENCFF089GZO,remap2022_ENCSR551YOZ.CG1620.adult_whole-fly_site-specific-recombination_insertion_FBgn0033183_ENCFF024NGE
ENCSR551YOZ.CG1620.adult_whole-fly_site-specific-recombination_insertion_FBgn0033183	ENCSR551YOZ	CG1620	FBgn0033183	adult	whole-fly	NA	whole-fly,site-specific-recombination,insertion	FALSE	FALSE	remap2022_ENCSR551YOZ.CG1620.adult_whole-fly_site-specific-recombination_insertion_FBgn0033183_ENCFF089GZO,remap2022_ENCSR551YOZ.CG1620.adult_whole-fly_site-specific-recombination_insertion_FBgn0033183_ENCFF024NGE
ENCSR555TTB.Hr51.adult_whole-fly_site-specific-recombination_insertion_FBgn0034012	ENCSR555TTB	Hr51	FBgn0034012	adult	whole-fly	NA	whole-fly,site-specific-recombination,insertion	FALSE	FALSE	remap2022_ENCSR555TTB.Hr51.adult_whole-fly_site-specific-recombination_insertion_FBgn0034012_ENCFF296IJW,remap2022_ENCSR555TTB.Hr51.adult_whole-fly_site-specific-recombination_insertion_FBgn0034012_ENCFF452XOO
ENCSR555TTB.Hr51.adult_whole-fly_site-specific-recombination_insertion_FBgn0034012	ENCSR555TTB	Hr51	FBgn0034012	adult	whole-fly	NA	whole-fly,site-specific-recombination,insertion	FALSE	FALSE	remap2022_ENCSR555TTB.Hr51.adult_whole-fly_site-specific-recombination_insertion_FBgn0034012_ENCFF296IJW,remap2022_ENCSR555TTB.Hr51.adult_whole-fly_site-specific-recombination_insertion_FBgn0034012_ENCFF452XOO
ENCSR559AJG.E-bx.adult_whole-fly_site-specific-recombination_insertion_FBgn0000541	ENCSR559AJG	E-bx	FBgn0000541	adult	whole-fly	NA	whole-fly,site-specific-recombination,insertion	FALSE	FALSE	remap2022_ENCSR559AJG.E-bx.adult_whole-fly_site-specific-recombination_insertion_FBgn0000541_ENCFF108AEW,remap2022_ENCSR559AJG.E-bx.adult_whole-fly_site-specific-recombination_insertion_FBgn0000541_ENCFF921AIS,remap2022_ENCSR559AJG.E-bx.adult_whole-fly_site-specific-recombination_insertion_FBgn0000541_ENCFF465XDQ
ENCSR559AJG.E-bx.adult_whole-fly_site-specific-recombination_insertion_FBgn0000541	ENCSR559AJG	E-bx	FBgn0000541	adult	whole-fly	NA	whole-fly,site-specific-recombination,insertion	FALSE	FALSE	remap2022_ENCSR559AJG.E-bx.adult_whole-fly_site-specific-recombination_insertion_FBgn0000541_ENCFF108AEW,remap2022_ENCSR559AJG.E-bx.adult_whole-fly_site-specific-recombination_insertion_FBgn0000541_ENCFF921AIS,remap2022_ENCSR559AJG.E-bx.adult_whole-fly_site-specific-recombination_insertion_FBgn0000541_ENCFF465XDQ
ENCSR559AJG.E-bx.adult_whole-fly_site-specific-recombination_insertion_FBgn0000541	ENCSR559AJG	E-bx	FBgn0000541	adult	whole-fly	NA	whole-fly,site-specific-recombination,insertion	FALSE	FALSE	remap2022_ENCSR559AJG.E-bx.adult_whole-fly_site-specific-recombination_insertion_FBgn0000541_ENCFF108AEW,remap2022_ENCSR559AJG.E-bx.adult_whole-fly_site-specific-recombination_insertion_FBgn0000541_ENCFF921AIS,remap2022_ENCSR559AJG.E-bx.adult_whole-fly_site-specific-recombination_insertion_FBgn0000541_ENCFF465XDQ
ENCSR564UWC.Vsx1.adult_whole-fly_site-specific-recombination_insertion_FBgn0263511	ENCSR564UWC	Vsx1	FBgn0263511	adult	whole-fly	NA	whole-fly,site-specific-recombination,insertion	FALSE	FALSE	remap2022_ENCSR564UWC.Vsx1.adult_whole-fly_site-specific-recombination_insertion_FBgn0263511_ENCFF980PPQ,remap2022_ENCSR564UWC.Vsx1.adult_whole-fly_site-specific-recombination_insertion_FBgn0263511_ENCFF366RQK
ENCSR564UWC.Vsx1.adult_whole-fly_site-specific-recombination_insertion_FBgn0263511	ENCSR564UWC	Vsx1	FBgn0263511	adult	whole-fly	NA	whole-fly,site-specific-recombination,insertion	FALSE	FALSE	remap2022_ENCSR564UWC.Vsx1.adult_whole-fly_site-specific-recombination_insertion_FBgn0263511_ENCFF980PPQ,remap2022_ENCSR564UWC.Vsx1.adult_whole-fly_site-specific-recombination_insertion_FBgn0263511_ENCFF366RQK
ENCSR566ZYE.EcR.adult_whole-fly_insertion_FBgn0000546	ENCSR566ZYE	EcR	FBgn0000546	adult	whole-fly	NA	whole-fly,insertion	FALSE	FALSE	remap2022_ENCSR566ZYE.EcR.adult_whole-fly_insertion_FBgn0000546_ENCFF148AVN,remap2022_ENCSR566ZYE.EcR.adult_whole-fly_insertion_FBgn0000546_ENCFF479TSS,remap2022_ENCSR566ZYE.EcR.adult_whole-fly_insertion_FBgn0000546_ENCFF206NXB
ENCSR566ZYE.EcR.adult_whole-fly_insertion_FBgn0000546	ENCSR566ZYE	EcR	FBgn0000546	adult	whole-fly	NA	whole-fly,insertion	FALSE	FALSE	remap2022_ENCSR566ZYE.EcR.adult_whole-fly_insertion_FBgn0000546_ENCFF148AVN,remap2022_ENCSR566ZYE.EcR.adult_whole-fly_insertion_FBgn0000546_ENCFF479TSS,remap2022_ENCSR566ZYE.EcR.adult_whole-fly_insertion_FBgn0000546_ENCFF206NXB
ENCSR566ZYE.EcR.adult_whole-fly_insertion_FBgn0000546	ENCSR566ZYE	EcR	FBgn0000546	adult	whole-fly	NA	whole-fly,insertion	FALSE	FALSE	remap2022_ENCSR566ZYE.EcR.adult_whole-fly_insertion_FBgn0000546_ENCFF148AVN,remap2022_ENCSR566ZYE.EcR.adult_whole-fly_insertion_FBgn0000546_ENCFF479TSS,remap2022_ENCSR566ZYE.EcR.adult_whole-fly_insertion_FBgn0000546_ENCFF206NXB
ENCSR568EBW.Camta.adult_whole-fly_site-specific-recombination_insertion_FBgn0259234	ENCSR568EBW	Camta	FBgn0259234	adult	whole-fly	NA	whole-fly,site-specific-recombination,insertion	FALSE	FALSE	remap2022_ENCSR568EBW.Camta.adult_whole-fly_site-specific-recombination_insertion_FBgn0259234_ENCFF758DYB,remap2022_ENCSR568EBW.Camta.adult_whole-fly_site-specific-recombination_insertion_FBgn0259234_ENCFF485IRT
ENCSR568EBW.Camta.adult_whole-fly_site-specific-recombination_insertion_FBgn0259234	ENCSR568EBW	Camta	FBgn0259234	adult	whole-fly	NA	whole-fly,site-specific-recombination,insertion	FALSE	FALSE	remap2022_ENCSR568EBW.Camta.adult_whole-fly_site-specific-recombination_insertion_FBgn0259234_ENCFF758DYB,remap2022_ENCSR568EBW.Camta.adult_whole-fly_site-specific-recombination_insertion_FBgn0259234_ENCFF485IRT
ENCSR569AVN.CG8478.adult_whole-fly_FBgn0037746	ENCSR569AVN	CG8478	FBgn0037746	adult	whole-fly	NA	whole-fly	FALSE	FALSE	remap2022_ENCSR569AVN.CG8478.adult_whole-fly_FBgn0037746_ENCFF203ACX,remap2022_ENCSR569AVN.CG8478.adult_whole-fly_FBgn0037746_ENCFF161WHP
ENCSR569AVN.CG8478.adult_whole-fly_FBgn0037746	ENCSR569AVN	CG8478	FBgn0037746	adult	whole-fly	NA	whole-fly	FALSE	FALSE	remap2022_ENCSR569AVN.CG8478.adult_whole-fly_FBgn0037746_ENCFF203ACX,remap2022_ENCSR569AVN.CG8478.adult_whole-fly_FBgn0037746_ENCFF161WHP
ENCSR570ADO.sv.adult_whole-fly_site-specific-recombination_insertion_FBgn0005561	ENCSR570ADO	sv	FBgn0005561	adult	whole-fly	NA	whole-fly,site-specific-recombination,insertion	FALSE	FALSE	remap2022_ENCSR570ADO.sv.adult_whole-fly_site-specific-recombination_insertion_FBgn0005561_ENCFF204LCM,remap2022_ENCSR570ADO.sv.adult_whole-fly_site-specific-recombination_insertion_FBgn0005561_ENCFF190PXU,remap2022_ENCSR570ADO.sv.adult_whole-fly_site-specific-recombination_insertion_FBgn0005561_ENCFF829PDK
ENCSR570ADO.sv.adult_whole-fly_site-specific-recombination_insertion_FBgn0005561	ENCSR570ADO	sv	FBgn0005561	adult	whole-fly	NA	whole-fly,site-specific-recombination,insertion	FALSE	FALSE	remap2022_ENCSR570ADO.sv.adult_whole-fly_site-specific-recombination_insertion_FBgn0005561_ENCFF204LCM,remap2022_ENCSR570ADO.sv.adult_whole-fly_site-specific-recombination_insertion_FBgn0005561_ENCFF190PXU,remap2022_ENCSR570ADO.sv.adult_whole-fly_site-specific-recombination_insertion_FBgn0005561_ENCFF829PDK
ENCSR570ADO.sv.adult_whole-fly_site-specific-recombination_insertion_FBgn0005561	ENCSR570ADO	sv	FBgn0005561	adult	whole-fly	NA	whole-fly,site-specific-recombination,insertion	FALSE	FALSE	remap2022_ENCSR570ADO.sv.adult_whole-fly_site-specific-recombination_insertion_FBgn0005561_ENCFF204LCM,remap2022_ENCSR570ADO.sv.adult_whole-fly_site-specific-recombination_insertion_FBgn0005561_ENCFF190PXU,remap2022_ENCSR570ADO.sv.adult_whole-fly_site-specific-recombination_insertion_FBgn0005561_ENCFF829PDK
ENCSR572ERS.CG31627.adult_whole-fly_site-specific-recombination_insertion_FBgn0051627	ENCSR572ERS	CG31627	FBgn0051627	adult	whole-fly	NA	whole-fly,site-specific-recombination,insertion	FALSE	FALSE	remap2022_ENCSR572ERS.CG31627.adult_whole-fly_site-specific-recombination_insertion_FBgn0051627_ENCFF600GVP,remap2022_ENCSR572ERS.CG31627.adult_whole-fly_site-specific-recombination_insertion_FBgn0051627_ENCFF123MQR,remap2022_ENCSR572ERS.CG31627.adult_whole-fly_site-specific-recombination_insertion_FBgn0051627_ENCFF581MYX
ENCSR572ERS.CG31627.adult_whole-fly_site-specific-recombination_insertion_FBgn0051627	ENCSR572ERS	CG31627	FBgn0051627	adult	whole-fly	NA	whole-fly,site-specific-recombination,insertion	FALSE	FALSE	remap2022_ENCSR572ERS.CG31627.adult_whole-fly_site-specific-recombination_insertion_FBgn0051627_ENCFF600GVP,remap2022_ENCSR572ERS.CG31627.adult_whole-fly_site-specific-recombination_insertion_FBgn0051627_ENCFF123MQR,remap2022_ENCSR572ERS.CG31627.adult_whole-fly_site-specific-recombination_insertion_FBgn0051627_ENCFF581MYX
ENCSR572ERS.CG31627.adult_whole-fly_site-specific-recombination_insertion_FBgn0051627	ENCSR572ERS	CG31627	FBgn0051627	adult	whole-fly	NA	whole-fly,site-specific-recombination,insertion	FALSE	FALSE	remap2022_ENCSR572ERS.CG31627.adult_whole-fly_site-specific-recombination_insertion_FBgn0051627_ENCFF600GVP,remap2022_ENCSR572ERS.CG31627.adult_whole-fly_site-specific-recombination_insertion_FBgn0051627_ENCFF123MQR,remap2022_ENCSR572ERS.CG31627.adult_whole-fly_site-specific-recombination_insertion_FBgn0051627_ENCFF581MYX
ENCSR572JUN.Ets96B.adult_whole-fly_site-specific-recombination_insertion_FBgn0039225	ENCSR572JUN	Ets96B	FBgn0039225	adult	whole-fly	NA	whole-fly,site-specific-recombination,insertion	FALSE	FALSE	remap2022_ENCSR572JUN.Ets96B.adult_whole-fly_site-specific-recombination_insertion_FBgn0039225_ENCFF211QBQ,remap2022_ENCSR572JUN.Ets96B.adult_whole-fly_site-specific-recombination_insertion_FBgn0039225_ENCFF805WRR
ENCSR572JUN.Ets96B.adult_whole-fly_site-specific-recombination_insertion_FBgn0039225	ENCSR572JUN	Ets96B	FBgn0039225	adult	whole-fly	NA	whole-fly,site-specific-recombination,insertion	FALSE	FALSE	remap2022_ENCSR572JUN.Ets96B.adult_whole-fly_site-specific-recombination_insertion_FBgn0039225_ENCFF211QBQ,remap2022_ENCSR572JUN.Ets96B.adult_whole-fly_site-specific-recombination_insertion_FBgn0039225_ENCFF805WRR
ENCSR577TRI.CG15710.adult_whole-fly_site-specific-recombination_insertion_FBgn0034120	ENCSR577TRI	CG15710	FBgn0034120	adult	whole-fly	NA	whole-fly,site-specific-recombination,insertion	FALSE	FALSE	remap2022_ENCSR577TRI.CG15710.adult_whole-fly_site-specific-recombination_insertion_FBgn0034120_ENCFF207VXH,remap2022_ENCSR577TRI.CG15710.adult_whole-fly_site-specific-recombination_insertion_FBgn0034120_ENCFF782UKC
ENCSR577TRI.CG15710.adult_whole-fly_site-specific-recombination_insertion_FBgn0034120	ENCSR577TRI	CG15710	FBgn0034120	adult	whole-fly	NA	whole-fly,site-specific-recombination,insertion	FALSE	FALSE	remap2022_ENCSR577TRI.CG15710.adult_whole-fly_site-specific-recombination_insertion_FBgn0034120_ENCFF207VXH,remap2022_ENCSR577TRI.CG15710.adult_whole-fly_site-specific-recombination_insertion_FBgn0034120_ENCFF782UKC
ENCSR578RWH.pzg.adult_whole-fly_site-specific-recombination_insertion_FBgn0259785	ENCSR578RWH	pzg	FBgn0259785	adult	whole-fly	NA	whole-fly,site-specific-recombination,insertion	FALSE	FALSE	remap2022_ENCSR578RWH.pzg.adult_whole-fly_site-specific-recombination_insertion_FBgn0259785_ENCFF834XPW,remap2022_ENCSR578RWH.pzg.adult_whole-fly_site-specific-recombination_insertion_FBgn0259785_ENCFF477DDN,remap2022_ENCSR578RWH.pzg.adult_whole-fly_site-specific-recombination_insertion_FBgn0259785_ENCFF862TJH
ENCSR578RWH.pzg.adult_whole-fly_site-specific-recombination_insertion_FBgn0259785	ENCSR578RWH	pzg	FBgn0259785	adult	whole-fly	NA	whole-fly,site-specific-recombination,insertion	FALSE	FALSE	remap2022_ENCSR578RWH.pzg.adult_whole-fly_site-specific-recombination_insertion_FBgn0259785_ENCFF834XPW,remap2022_ENCSR578RWH.pzg.adult_whole-fly_site-specific-recombination_insertion_FBgn0259785_ENCFF477DDN,remap2022_ENCSR578RWH.pzg.adult_whole-fly_site-specific-recombination_insertion_FBgn0259785_ENCFF862TJH
ENCSR578RWH.pzg.adult_whole-fly_site-specific-recombination_insertion_FBgn0259785	ENCSR578RWH	pzg	FBgn0259785	adult	whole-fly	NA	whole-fly,site-specific-recombination,insertion	FALSE	FALSE	remap2022_ENCSR578RWH.pzg.adult_whole-fly_site-specific-recombination_insertion_FBgn0259785_ENCFF834XPW,remap2022_ENCSR578RWH.pzg.adult_whole-fly_site-specific-recombination_insertion_FBgn0259785_ENCFF477DDN,remap2022_ENCSR578RWH.pzg.adult_whole-fly_site-specific-recombination_insertion_FBgn0259785_ENCFF862TJH
ENCSR579WFC.kni.adult_whole-fly_site-specific-recombination_insertion_FBgn0001320	ENCSR579WFC	kni	FBgn0001320	adult	whole-fly	NA	whole-fly,site-specific-recombination,insertion	FALSE	FALSE	remap2022_ENCSR579WFC.kni.adult_whole-fly_site-specific-recombination_insertion_FBgn0001320_ENCFF880BYH,remap2022_ENCSR579WFC.kni.adult_whole-fly_site-specific-recombination_insertion_FBgn0001320_ENCFF209TVC,remap2022_ENCSR579WFC.kni.adult_whole-fly_site-specific-recombination_insertion_FBgn0001320_ENCFF761BZM
ENCSR579WFC.kni.adult_whole-fly_site-specific-recombination_insertion_FBgn0001320	ENCSR579WFC	kni	FBgn0001320	adult	whole-fly	NA	whole-fly,site-specific-recombination,insertion	FALSE	FALSE	remap2022_ENCSR579WFC.kni.adult_whole-fly_site-specific-recombination_insertion_FBgn0001320_ENCFF880BYH,remap2022_ENCSR579WFC.kni.adult_whole-fly_site-specific-recombination_insertion_FBgn0001320_ENCFF209TVC,remap2022_ENCSR579WFC.kni.adult_whole-fly_site-specific-recombination_insertion_FBgn0001320_ENCFF761BZM
ENCSR579WFC.kni.adult_whole-fly_site-specific-recombination_insertion_FBgn0001320	ENCSR579WFC	kni	FBgn0001320	adult	whole-fly	NA	whole-fly,site-specific-recombination,insertion	FALSE	FALSE	remap2022_ENCSR579WFC.kni.adult_whole-fly_site-specific-recombination_insertion_FBgn0001320_ENCFF880BYH,remap2022_ENCSR579WFC.kni.adult_whole-fly_site-specific-recombination_insertion_FBgn0001320_ENCFF209TVC,remap2022_ENCSR579WFC.kni.adult_whole-fly_site-specific-recombination_insertion_FBgn0001320_ENCFF761BZM
ENCSR581LRS.sc.adult_whole-fly_site-specific-recombination_insertion_FBgn0004170	ENCSR581LRS	sc	FBgn0004170	adult	whole-fly	NA	whole-fly,site-specific-recombination,insertion	FALSE	FALSE	remap2022_ENCSR581LRS.sc.adult_whole-fly_site-specific-recombination_insertion_FBgn0004170_ENCFF018CQB,remap2022_ENCSR581LRS.sc.adult_whole-fly_site-specific-recombination_insertion_FBgn0004170_ENCFF501PSH,remap2022_ENCSR581LRS.sc.adult_whole-fly_site-specific-recombination_insertion_FBgn0004170_ENCFF974PPT
ENCSR581LRS.sc.adult_whole-fly_site-specific-recombination_insertion_FBgn0004170	ENCSR581LRS	sc	FBgn0004170	adult	whole-fly	NA	whole-fly,site-specific-recombination,insertion	FALSE	FALSE	remap2022_ENCSR581LRS.sc.adult_whole-fly_site-specific-recombination_insertion_FBgn0004170_ENCFF018CQB,remap2022_ENCSR581LRS.sc.adult_whole-fly_site-specific-recombination_insertion_FBgn0004170_ENCFF501PSH,remap2022_ENCSR581LRS.sc.adult_whole-fly_site-specific-recombination_insertion_FBgn0004170_ENCFF974PPT
ENCSR581LRS.sc.adult_whole-fly_site-specific-recombination_insertion_FBgn0004170	ENCSR581LRS	sc	FBgn0004170	adult	whole-fly	NA	whole-fly,site-specific-recombination,insertion	FALSE	FALSE	remap2022_ENCSR581LRS.sc.adult_whole-fly_site-specific-recombination_insertion_FBgn0004170_ENCFF018CQB,remap2022_ENCSR581LRS.sc.adult_whole-fly_site-specific-recombination_insertion_FBgn0004170_ENCFF501PSH,remap2022_ENCSR581LRS.sc.adult_whole-fly_site-specific-recombination_insertion_FBgn0004170_ENCFF974PPT
ENCSR582OWB.CG44002.adult_whole-fly_site-specific-recombination_insertion_FBgn0264744	ENCSR582OWB	CG44002	FBgn0264744	adult	whole-fly	NA	whole-fly,site-specific-recombination,insertion	FALSE	FALSE	remap2022_ENCSR582OWB.CG44002.adult_whole-fly_site-specific-recombination_insertion_FBgn0264744_ENCFF622ABF,remap2022_ENCSR582OWB.CG44002.adult_whole-fly_site-specific-recombination_insertion_FBgn0264744_ENCFF264ETF,remap2022_ENCSR582OWB.CG44002.adult_whole-fly_site-specific-recombination_insertion_FBgn0264744_ENCFF723CMO
ENCSR582OWB.CG44002.adult_whole-fly_site-specific-recombination_insertion_FBgn0264744	ENCSR582OWB	CG44002	FBgn0264744	adult	whole-fly	NA	whole-fly,site-specific-recombination,insertion	FALSE	FALSE	remap2022_ENCSR582OWB.CG44002.adult_whole-fly_site-specific-recombination_insertion_FBgn0264744_ENCFF622ABF,remap2022_ENCSR582OWB.CG44002.adult_whole-fly_site-specific-recombination_insertion_FBgn0264744_ENCFF264ETF,remap2022_ENCSR582OWB.CG44002.adult_whole-fly_site-specific-recombination_insertion_FBgn0264744_ENCFF723CMO
ENCSR582OWB.CG44002.adult_whole-fly_site-specific-recombination_insertion_FBgn0264744	ENCSR582OWB	CG44002	FBgn0264744	adult	whole-fly	NA	whole-fly,site-specific-recombination,insertion	FALSE	FALSE	remap2022_ENCSR582OWB.CG44002.adult_whole-fly_site-specific-recombination_insertion_FBgn0264744_ENCFF622ABF,remap2022_ENCSR582OWB.CG44002.adult_whole-fly_site-specific-recombination_insertion_FBgn0264744_ENCFF264ETF,remap2022_ENCSR582OWB.CG44002.adult_whole-fly_site-specific-recombination_insertion_FBgn0264744_ENCFF723CMO
ENCSR583EFI.ss.adult_whole-fly_site-specific-recombination_insertion_FBgn0003513	ENCSR583EFI	ss	FBgn0003513	adult	whole-fly	NA	whole-fly,site-specific-recombination,insertion	FALSE	FALSE	remap2022_ENCSR583EFI.ss.adult_whole-fly_site-specific-recombination_insertion_FBgn0003513_ENCFF099AJG,remap2022_ENCSR583EFI.ss.adult_whole-fly_site-specific-recombination_insertion_FBgn0003513_ENCFF789SWA
ENCSR583EFI.ss.adult_whole-fly_site-specific-recombination_insertion_FBgn0003513	ENCSR583EFI	ss	FBgn0003513	adult	whole-fly	NA	whole-fly,site-specific-recombination,insertion	FALSE	FALSE	remap2022_ENCSR583EFI.ss.adult_whole-fly_site-specific-recombination_insertion_FBgn0003513_ENCFF099AJG,remap2022_ENCSR583EFI.ss.adult_whole-fly_site-specific-recombination_insertion_FBgn0003513_ENCFF789SWA
ENCSR584XDP.CG7368.adult_whole-fly_site-specific-recombination_insertion_FBgn0036179	ENCSR584XDP	CG7368	FBgn0036179	adult	whole-fly	NA	whole-fly,site-specific-recombination,insertion	FALSE	FALSE	remap2022_ENCSR584XDP.CG7368.adult_whole-fly_site-specific-recombination_insertion_FBgn0036179_ENCFF500DPZ,remap2022_ENCSR584XDP.CG7368.adult_whole-fly_site-specific-recombination_insertion_FBgn0036179_ENCFF622LCL,remap2022_ENCSR584XDP.CG7368.adult_whole-fly_site-specific-recombination_insertion_FBgn0036179_ENCFF361WVW
ENCSR584XDP.CG7368.adult_whole-fly_site-specific-recombination_insertion_FBgn0036179	ENCSR584XDP	CG7368	FBgn0036179	adult	whole-fly	NA	whole-fly,site-specific-recombination,insertion	FALSE	FALSE	remap2022_ENCSR584XDP.CG7368.adult_whole-fly_site-specific-recombination_insertion_FBgn0036179_ENCFF500DPZ,remap2022_ENCSR584XDP.CG7368.adult_whole-fly_site-specific-recombination_insertion_FBgn0036179_ENCFF622LCL,remap2022_ENCSR584XDP.CG7368.adult_whole-fly_site-specific-recombination_insertion_FBgn0036179_ENCFF361WVW
ENCSR584XDP.CG7368.adult_whole-fly_site-specific-recombination_insertion_FBgn0036179	ENCSR584XDP	CG7368	FBgn0036179	adult	whole-fly	NA	whole-fly,site-specific-recombination,insertion	FALSE	FALSE	remap2022_ENCSR584XDP.CG7368.adult_whole-fly_site-specific-recombination_insertion_FBgn0036179_ENCFF500DPZ,remap2022_ENCSR584XDP.CG7368.adult_whole-fly_site-specific-recombination_insertion_FBgn0036179_ENCFF622LCL,remap2022_ENCSR584XDP.CG7368.adult_whole-fly_site-specific-recombination_insertion_FBgn0036179_ENCFF361WVW
ENCSR587CWK.Deaf1.adult_whole-fly_site-specific-recombination_insertion_FBgn0013799	ENCSR587CWK	Deaf1	FBgn0013799	adult	whole-fly	NA	whole-fly,site-specific-recombination,insertion	FALSE	FALSE	remap2022_ENCSR587CWK.Deaf1.adult_whole-fly_site-specific-recombination_insertion_FBgn0013799_ENCFF820HZZ,remap2022_ENCSR587CWK.Deaf1.adult_whole-fly_site-specific-recombination_insertion_FBgn0013799_ENCFF057YUR,remap2022_ENCSR587CWK.Deaf1.adult_whole-fly_site-specific-recombination_insertion_FBgn0013799_ENCFF644IMR
ENCSR587CWK.Deaf1.adult_whole-fly_site-specific-recombination_insertion_FBgn0013799	ENCSR587CWK	Deaf1	FBgn0013799	adult	whole-fly	NA	whole-fly,site-specific-recombination,insertion	FALSE	FALSE	remap2022_ENCSR587CWK.Deaf1.adult_whole-fly_site-specific-recombination_insertion_FBgn0013799_ENCFF820HZZ,remap2022_ENCSR587CWK.Deaf1.adult_whole-fly_site-specific-recombination_insertion_FBgn0013799_ENCFF057YUR,remap2022_ENCSR587CWK.Deaf1.adult_whole-fly_site-specific-recombination_insertion_FBgn0013799_ENCFF644IMR
ENCSR587CWK.Deaf1.adult_whole-fly_site-specific-recombination_insertion_FBgn0013799	ENCSR587CWK	Deaf1	FBgn0013799	adult	whole-fly	NA	whole-fly,site-specific-recombination,insertion	FALSE	FALSE	remap2022_ENCSR587CWK.Deaf1.adult_whole-fly_site-specific-recombination_insertion_FBgn0013799_ENCFF820HZZ,remap2022_ENCSR587CWK.Deaf1.adult_whole-fly_site-specific-recombination_insertion_FBgn0013799_ENCFF057YUR,remap2022_ENCSR587CWK.Deaf1.adult_whole-fly_site-specific-recombination_insertion_FBgn0013799_ENCFF644IMR
ENCSR588OSO.CG17801.adult_ovary_site-specific-recombination_insertion_FBgn0038550	ENCSR588OSO	CG17801	FBgn0038550	adult	ovary	NA	ovary,site-specific-recombination,insertion	FALSE	FALSE	remap2022_ENCSR588OSO.CG17801.adult_ovary_site-specific-recombination_insertion_FBgn0038550_ENCFF328NYG,remap2022_ENCSR588OSO.CG17801.adult_ovary_site-specific-recombination_insertion_FBgn0038550_ENCFF763FHM
ENCSR588OSO.CG17801.adult_ovary_site-specific-recombination_insertion_FBgn0038550	ENCSR588OSO	CG17801	FBgn0038550	adult	ovary	NA	ovary,site-specific-recombination,insertion	FALSE	FALSE	remap2022_ENCSR588OSO.CG17801.adult_ovary_site-specific-recombination_insertion_FBgn0038550_ENCFF328NYG,remap2022_ENCSR588OSO.CG17801.adult_ovary_site-specific-recombination_insertion_FBgn0038550_ENCFF763FHM
ENCSR589XWJ.Su-var-3-7.adult_whole-fly_site-specific-recombination_insertion_FBgn0003598	ENCSR589XWJ	Su-var-3-7	FBgn0003598	adult	whole-fly	NA	whole-fly,site-specific-recombination,insertion	FALSE	FALSE	remap2022_ENCSR589XWJ.Su-var-3-7.adult_whole-fly_site-specific-recombination_insertion_FBgn0003598_ENCFF717TBL,remap2022_ENCSR589XWJ.Su-var-3-7.adult_whole-fly_site-specific-recombination_insertion_FBgn0003598_ENCFF459YIY,remap2022_ENCSR589XWJ.Su-var-3-7.adult_whole-fly_site-specific-recombination_insertion_FBgn0003598_ENCFF931WLM
ENCSR589XWJ.Su-var-3-7.adult_whole-fly_site-specific-recombination_insertion_FBgn0003598	ENCSR589XWJ	Su-var-3-7	FBgn0003598	adult	whole-fly	NA	whole-fly,site-specific-recombination,insertion	FALSE	FALSE	remap2022_ENCSR589XWJ.Su-var-3-7.adult_whole-fly_site-specific-recombination_insertion_FBgn0003598_ENCFF717TBL,remap2022_ENCSR589XWJ.Su-var-3-7.adult_whole-fly_site-specific-recombination_insertion_FBgn0003598_ENCFF459YIY,remap2022_ENCSR589XWJ.Su-var-3-7.adult_whole-fly_site-specific-recombination_insertion_FBgn0003598_ENCFF931WLM
ENCSR589XWJ.Su-var-3-7.adult_whole-fly_site-specific-recombination_insertion_FBgn0003598	ENCSR589XWJ	Su-var-3-7	FBgn0003598	adult	whole-fly	NA	whole-fly,site-specific-recombination,insertion	FALSE	FALSE	remap2022_ENCSR589XWJ.Su-var-3-7.adult_whole-fly_site-specific-recombination_insertion_FBgn0003598_ENCFF717TBL,remap2022_ENCSR589XWJ.Su-var-3-7.adult_whole-fly_site-specific-recombination_insertion_FBgn0003598_ENCFF459YIY,remap2022_ENCSR589XWJ.Su-var-3-7.adult_whole-fly_site-specific-recombination_insertion_FBgn0003598_ENCFF931WLM
ENCSR591PRH.sd.adult_whole-fly_site-specific-recombination_insertion_FBgn0003345	ENCSR591PRH	sd	FBgn0003345	adult	whole-fly	NA	whole-fly,site-specific-recombination,insertion	FALSE	FALSE	remap2022_ENCSR591PRH.sd.adult_whole-fly_site-specific-recombination_insertion_FBgn0003345_ENCFF520ZXP,remap2022_ENCSR591PRH.sd.adult_whole-fly_site-specific-recombination_insertion_FBgn0003345_ENCFF164AIR,remap2022_ENCSR591PRH.sd.adult_whole-fly_site-specific-recombination_insertion_FBgn0003345_ENCFF273CXP
ENCSR591PRH.sd.adult_whole-fly_site-specific-recombination_insertion_FBgn0003345	ENCSR591PRH	sd	FBgn0003345	adult	whole-fly	NA	whole-fly,site-specific-recombination,insertion	FALSE	FALSE	remap2022_ENCSR591PRH.sd.adult_whole-fly_site-specific-recombination_insertion_FBgn0003345_ENCFF520ZXP,remap2022_ENCSR591PRH.sd.adult_whole-fly_site-specific-recombination_insertion_FBgn0003345_ENCFF164AIR,remap2022_ENCSR591PRH.sd.adult_whole-fly_site-specific-recombination_insertion_FBgn0003345_ENCFF273CXP
ENCSR591PRH.sd.adult_whole-fly_site-specific-recombination_insertion_FBgn0003345	ENCSR591PRH	sd	FBgn0003345	adult	whole-fly	NA	whole-fly,site-specific-recombination,insertion	FALSE	FALSE	remap2022_ENCSR591PRH.sd.adult_whole-fly_site-specific-recombination_insertion_FBgn0003345_ENCFF520ZXP,remap2022_ENCSR591PRH.sd.adult_whole-fly_site-specific-recombination_insertion_FBgn0003345_ENCFF164AIR,remap2022_ENCSR591PRH.sd.adult_whole-fly_site-specific-recombination_insertion_FBgn0003345_ENCFF273CXP
ENCSR593ZMJ.mirr.adult_whole-fly_site-specific-recombination_insertion_FBgn0014343	ENCSR593ZMJ	mirr	FBgn0014343	adult	whole-fly	NA	whole-fly,site-specific-recombination,insertion	FALSE	FALSE	remap2022_ENCSR593ZMJ.mirr.adult_whole-fly_site-specific-recombination_insertion_FBgn0014343_ENCFF077FPL,remap2022_ENCSR593ZMJ.mirr.adult_whole-fly_site-specific-recombination_insertion_FBgn0014343_ENCFF461UTB,remap2022_ENCSR593ZMJ.mirr.adult_whole-fly_site-specific-recombination_insertion_FBgn0014343_ENCFF101VCK
ENCSR593ZMJ.mirr.adult_whole-fly_site-specific-recombination_insertion_FBgn0014343	ENCSR593ZMJ	mirr	FBgn0014343	adult	whole-fly	NA	whole-fly,site-specific-recombination,insertion	FALSE	FALSE	remap2022_ENCSR593ZMJ.mirr.adult_whole-fly_site-specific-recombination_insertion_FBgn0014343_ENCFF077FPL,remap2022_ENCSR593ZMJ.mirr.adult_whole-fly_site-specific-recombination_insertion_FBgn0014343_ENCFF461UTB,remap2022_ENCSR593ZMJ.mirr.adult_whole-fly_site-specific-recombination_insertion_FBgn0014343_ENCFF101VCK
ENCSR593ZMJ.mirr.adult_whole-fly_site-specific-recombination_insertion_FBgn0014343	ENCSR593ZMJ	mirr	FBgn0014343	adult	whole-fly	NA	whole-fly,site-specific-recombination,insertion	FALSE	FALSE	remap2022_ENCSR593ZMJ.mirr.adult_whole-fly_site-specific-recombination_insertion_FBgn0014343_ENCFF077FPL,remap2022_ENCSR593ZMJ.mirr.adult_whole-fly_site-specific-recombination_insertion_FBgn0014343_ENCFF461UTB,remap2022_ENCSR593ZMJ.mirr.adult_whole-fly_site-specific-recombination_insertion_FBgn0014343_ENCFF101VCK
ENCSR596YNC.Crg-1.adult_whole-fly_site-specific-recombination_insertion_FBgn0021738	ENCSR596YNC	Crg-1	FBgn0021738	adult	whole-fly	NA	whole-fly,site-specific-recombination,insertion	FALSE	FALSE	remap2022_ENCSR596YNC.Crg-1.adult_whole-fly_site-specific-recombination_insertion_FBgn0021738_ENCFF653FGC,remap2022_ENCSR596YNC.Crg-1.adult_whole-fly_site-specific-recombination_insertion_FBgn0021738_ENCFF966AQI
ENCSR596YNC.Crg-1.adult_whole-fly_site-specific-recombination_insertion_FBgn0021738	ENCSR596YNC	Crg-1	FBgn0021738	adult	whole-fly	NA	whole-fly,site-specific-recombination,insertion	FALSE	FALSE	remap2022_ENCSR596YNC.Crg-1.adult_whole-fly_site-specific-recombination_insertion_FBgn0021738_ENCFF653FGC,remap2022_ENCSR596YNC.Crg-1.adult_whole-fly_site-specific-recombination_insertion_FBgn0021738_ENCFF966AQI
ENCSR599DVZ.Tbp.adult_whole-fly_insertion_FBgn0003687	ENCSR599DVZ	Tbp	FBgn0003687	adult	whole-fly	NA	whole-fly,insertion	FALSE	FALSE	remap2022_ENCSR599DVZ.Tbp.adult_whole-fly_insertion_FBgn0003687_ENCFF250BXJ,remap2022_ENCSR599DVZ.Tbp.adult_whole-fly_insertion_FBgn0003687_ENCFF809IEZ
ENCSR599DVZ.Tbp.adult_whole-fly_insertion_FBgn0003687	ENCSR599DVZ	Tbp	FBgn0003687	adult	whole-fly	NA	whole-fly,insertion	FALSE	FALSE	remap2022_ENCSR599DVZ.Tbp.adult_whole-fly_insertion_FBgn0003687_ENCFF250BXJ,remap2022_ENCSR599DVZ.Tbp.adult_whole-fly_insertion_FBgn0003687_ENCFF809IEZ
ENCSR599WVE.CG10147.adult_whole-fly_site-specific-recombination_insertion_FBgn0035702	ENCSR599WVE	CG10147	FBgn0035702	adult	whole-fly	NA	whole-fly,site-specific-recombination,insertion	FALSE	FALSE	remap2022_ENCSR599WVE.CG10147.adult_whole-fly_site-specific-recombination_insertion_FBgn0035702_ENCFF798DAS,remap2022_ENCSR599WVE.CG10147.adult_whole-fly_site-specific-recombination_insertion_FBgn0035702_ENCFF186ITI
ENCSR599WVE.CG10147.adult_whole-fly_site-specific-recombination_insertion_FBgn0035702	ENCSR599WVE	CG10147	FBgn0035702	adult	whole-fly	NA	whole-fly,site-specific-recombination,insertion	FALSE	FALSE	remap2022_ENCSR599WVE.CG10147.adult_whole-fly_site-specific-recombination_insertion_FBgn0035702_ENCFF798DAS,remap2022_ENCSR599WVE.CG10147.adult_whole-fly_site-specific-recombination_insertion_FBgn0035702_ENCFF186ITI
ENCSR603LBA.Sp1.adult_whole-fly_site-specific-recombination_insertion_FBgn0020378	ENCSR603LBA	Sp1	FBgn0020378	adult	whole-fly	NA	whole-fly,site-specific-recombination,insertion	FALSE	FALSE	remap2022_ENCSR603LBA.Sp1.adult_whole-fly_site-specific-recombination_insertion_FBgn0020378_ENCFF173GBZ,remap2022_ENCSR603LBA.Sp1.adult_whole-fly_site-specific-recombination_insertion_FBgn0020378_ENCFF460GDR,remap2022_ENCSR603LBA.Sp1.adult_whole-fly_site-specific-recombination_insertion_FBgn0020378_ENCFF340GCS
ENCSR603LBA.Sp1.adult_whole-fly_site-specific-recombination_insertion_FBgn0020378	ENCSR603LBA	Sp1	FBgn0020378	adult	whole-fly	NA	whole-fly,site-specific-recombination,insertion	FALSE	FALSE	remap2022_ENCSR603LBA.Sp1.adult_whole-fly_site-specific-recombination_insertion_FBgn0020378_ENCFF173GBZ,remap2022_ENCSR603LBA.Sp1.adult_whole-fly_site-specific-recombination_insertion_FBgn0020378_ENCFF460GDR,remap2022_ENCSR603LBA.Sp1.adult_whole-fly_site-specific-recombination_insertion_FBgn0020378_ENCFF340GCS
ENCSR603LBA.Sp1.adult_whole-fly_site-specific-recombination_insertion_FBgn0020378	ENCSR603LBA	Sp1	FBgn0020378	adult	whole-fly	NA	whole-fly,site-specific-recombination,insertion	FALSE	FALSE	remap2022_ENCSR603LBA.Sp1.adult_whole-fly_site-specific-recombination_insertion_FBgn0020378_ENCFF173GBZ,remap2022_ENCSR603LBA.Sp1.adult_whole-fly_site-specific-recombination_insertion_FBgn0020378_ENCFF460GDR,remap2022_ENCSR603LBA.Sp1.adult_whole-fly_site-specific-recombination_insertion_FBgn0020378_ENCFF340GCS
ENCSR603QIJ.emc.adult_whole-fly_site-specific-recombination_insertion_FBgn0000575	ENCSR603QIJ	emc	FBgn0000575	adult	whole-fly	NA	whole-fly,site-specific-recombination,insertion	FALSE	FALSE	remap2022_ENCSR603QIJ.emc.adult_whole-fly_site-specific-recombination_insertion_FBgn0000575_ENCFF960WSH,remap2022_ENCSR603QIJ.emc.adult_whole-fly_site-specific-recombination_insertion_FBgn0000575_ENCFF142KBK
ENCSR603QIJ.emc.adult_whole-fly_site-specific-recombination_insertion_FBgn0000575	ENCSR603QIJ	emc	FBgn0000575	adult	whole-fly	NA	whole-fly,site-specific-recombination,insertion	FALSE	FALSE	remap2022_ENCSR603QIJ.emc.adult_whole-fly_site-specific-recombination_insertion_FBgn0000575_ENCFF960WSH,remap2022_ENCSR603QIJ.emc.adult_whole-fly_site-specific-recombination_insertion_FBgn0000575_ENCFF142KBK
ENCSR605NFY.Fer2.adult_whole-fly_site-specific-recombination_insertion_FBgn0038402	ENCSR605NFY	Fer2	FBgn0038402	adult	whole-fly	NA	whole-fly,site-specific-recombination,insertion	FALSE	FALSE	remap2022_ENCSR605NFY.Fer2.adult_whole-fly_site-specific-recombination_insertion_FBgn0038402_ENCFF889YGT,remap2022_ENCSR605NFY.Fer2.adult_whole-fly_site-specific-recombination_insertion_FBgn0038402_ENCFF876UYC
ENCSR605NFY.Fer2.adult_whole-fly_site-specific-recombination_insertion_FBgn0038402	ENCSR605NFY	Fer2	FBgn0038402	adult	whole-fly	NA	whole-fly,site-specific-recombination,insertion	FALSE	FALSE	remap2022_ENCSR605NFY.Fer2.adult_whole-fly_site-specific-recombination_insertion_FBgn0038402_ENCFF889YGT,remap2022_ENCSR605NFY.Fer2.adult_whole-fly_site-specific-recombination_insertion_FBgn0038402_ENCFF876UYC
ENCSR606GOU.lola.adult_whole-fly_insertion_FBgn0283521	ENCSR606GOU	lola	FBgn0283521	adult	whole-fly	NA	whole-fly,insertion	FALSE	FALSE	remap2022_ENCSR606GOU.lola.adult_whole-fly_insertion_FBgn0283521_ENCFF550HGG,remap2022_ENCSR606GOU.lola.adult_whole-fly_insertion_FBgn0283521_ENCFF424UUW
ENCSR606GOU.lola.adult_whole-fly_insertion_FBgn0283521	ENCSR606GOU	lola	FBgn0283521	adult	whole-fly	NA	whole-fly,insertion	FALSE	FALSE	remap2022_ENCSR606GOU.lola.adult_whole-fly_insertion_FBgn0283521_ENCFF550HGG,remap2022_ENCSR606GOU.lola.adult_whole-fly_insertion_FBgn0283521_ENCFF424UUW
ENCSR608VFH.CG15011.adult_whole-fly_site-specific-recombination_insertion_FBgn0035518	ENCSR608VFH	CG15011	FBgn0035518	adult	whole-fly	NA	whole-fly,site-specific-recombination,insertion	FALSE	FALSE	remap2022_ENCSR608VFH.CG15011.adult_whole-fly_site-specific-recombination_insertion_FBgn0035518_ENCFF044OXY,remap2022_ENCSR608VFH.CG15011.adult_whole-fly_site-specific-recombination_insertion_FBgn0035518_ENCFF806MZZ,remap2022_ENCSR608VFH.CG15011.adult_whole-fly_site-specific-recombination_insertion_FBgn0035518_ENCFF127NLP
ENCSR608VFH.CG15011.adult_whole-fly_site-specific-recombination_insertion_FBgn0035518	ENCSR608VFH	CG15011	FBgn0035518	adult	whole-fly	NA	whole-fly,site-specific-recombination,insertion	FALSE	FALSE	remap2022_ENCSR608VFH.CG15011.adult_whole-fly_site-specific-recombination_insertion_FBgn0035518_ENCFF044OXY,remap2022_ENCSR608VFH.CG15011.adult_whole-fly_site-specific-recombination_insertion_FBgn0035518_ENCFF806MZZ,remap2022_ENCSR608VFH.CG15011.adult_whole-fly_site-specific-recombination_insertion_FBgn0035518_ENCFF127NLP
ENCSR608VFH.CG15011.adult_whole-fly_site-specific-recombination_insertion_FBgn0035518	ENCSR608VFH	CG15011	FBgn0035518	adult	whole-fly	NA	whole-fly,site-specific-recombination,insertion	FALSE	FALSE	remap2022_ENCSR608VFH.CG15011.adult_whole-fly_site-specific-recombination_insertion_FBgn0035518_ENCFF044OXY,remap2022_ENCSR608VFH.CG15011.adult_whole-fly_site-specific-recombination_insertion_FBgn0035518_ENCFF806MZZ,remap2022_ENCSR608VFH.CG15011.adult_whole-fly_site-specific-recombination_insertion_FBgn0035518_ENCFF127NLP
ENCSR609JDR.abd-A.adult_whole-fly_site-specific-recombination_insertion_FBgn0000014	ENCSR609JDR	abd-A	FBgn0000014	adult	whole-fly	NA	whole-fly,site-specific-recombination,insertion	FALSE	FALSE	remap2022_ENCSR609JDR.abd-A.adult_whole-fly_site-specific-recombination_insertion_FBgn0000014_ENCFF999PWE,remap2022_ENCSR609JDR.abd-A.adult_whole-fly_site-specific-recombination_insertion_FBgn0000014_ENCFF646QDZ,remap2022_ENCSR609JDR.abd-A.adult_whole-fly_site-specific-recombination_insertion_FBgn0000014_ENCFF036RZV
ENCSR609JDR.abd-A.adult_whole-fly_site-specific-recombination_insertion_FBgn0000014	ENCSR609JDR	abd-A	FBgn0000014	adult	whole-fly	NA	whole-fly,site-specific-recombination,insertion	FALSE	FALSE	remap2022_ENCSR609JDR.abd-A.adult_whole-fly_site-specific-recombination_insertion_FBgn0000014_ENCFF999PWE,remap2022_ENCSR609JDR.abd-A.adult_whole-fly_site-specific-recombination_insertion_FBgn0000014_ENCFF646QDZ,remap2022_ENCSR609JDR.abd-A.adult_whole-fly_site-specific-recombination_insertion_FBgn0000014_ENCFF036RZV
ENCSR609JDR.abd-A.adult_whole-fly_site-specific-recombination_insertion_FBgn0000014	ENCSR609JDR	abd-A	FBgn0000014	adult	whole-fly	NA	whole-fly,site-specific-recombination,insertion	FALSE	FALSE	remap2022_ENCSR609JDR.abd-A.adult_whole-fly_site-specific-recombination_insertion_FBgn0000014_ENCFF999PWE,remap2022_ENCSR609JDR.abd-A.adult_whole-fly_site-specific-recombination_insertion_FBgn0000014_ENCFF646QDZ,remap2022_ENCSR609JDR.abd-A.adult_whole-fly_site-specific-recombination_insertion_FBgn0000014_ENCFF036RZV
ENCSR609RLI.mio.adult_whole-fly_site-specific-recombination_insertion_FBgn0031399	ENCSR609RLI	mio	FBgn0031399	adult	whole-fly	NA	whole-fly,site-specific-recombination,insertion	FALSE	FALSE	remap2022_ENCSR609RLI.mio.adult_whole-fly_site-specific-recombination_insertion_FBgn0031399_ENCFF500PYX,remap2022_ENCSR609RLI.mio.adult_whole-fly_site-specific-recombination_insertion_FBgn0031399_ENCFF402RFN
ENCSR609RLI.mio.adult_whole-fly_site-specific-recombination_insertion_FBgn0031399	ENCSR609RLI	mio	FBgn0031399	adult	whole-fly	NA	whole-fly,site-specific-recombination,insertion	FALSE	FALSE	remap2022_ENCSR609RLI.mio.adult_whole-fly_site-specific-recombination_insertion_FBgn0031399_ENCFF500PYX,remap2022_ENCSR609RLI.mio.adult_whole-fly_site-specific-recombination_insertion_FBgn0031399_ENCFF402RFN
ENCSR613JPW.Snoo.adult_whole-fly_site-specific-recombination_insertion_FBgn0085450	ENCSR613JPW	Snoo	FBgn0085450	adult	whole-fly	NA	whole-fly,site-specific-recombination,insertion	FALSE	FALSE	remap2022_ENCSR613JPW.Snoo.adult_whole-fly_site-specific-recombination_insertion_FBgn0085450_ENCFF994NLN,remap2022_ENCSR613JPW.Snoo.adult_whole-fly_site-specific-recombination_insertion_FBgn0085450_ENCFF668CIV,remap2022_ENCSR613JPW.Snoo.adult_whole-fly_site-specific-recombination_insertion_FBgn0085450_ENCFF698UUX
ENCSR613JPW.Snoo.adult_whole-fly_site-specific-recombination_insertion_FBgn0085450	ENCSR613JPW	Snoo	FBgn0085450	adult	whole-fly	NA	whole-fly,site-specific-recombination,insertion	FALSE	FALSE	remap2022_ENCSR613JPW.Snoo.adult_whole-fly_site-specific-recombination_insertion_FBgn0085450_ENCFF994NLN,remap2022_ENCSR613JPW.Snoo.adult_whole-fly_site-specific-recombination_insertion_FBgn0085450_ENCFF668CIV,remap2022_ENCSR613JPW.Snoo.adult_whole-fly_site-specific-recombination_insertion_FBgn0085450_ENCFF698UUX
ENCSR613JPW.Snoo.adult_whole-fly_site-specific-recombination_insertion_FBgn0085450	ENCSR613JPW	Snoo	FBgn0085450	adult	whole-fly	NA	whole-fly,site-specific-recombination,insertion	FALSE	FALSE	remap2022_ENCSR613JPW.Snoo.adult_whole-fly_site-specific-recombination_insertion_FBgn0085450_ENCFF994NLN,remap2022_ENCSR613JPW.Snoo.adult_whole-fly_site-specific-recombination_insertion_FBgn0085450_ENCFF668CIV,remap2022_ENCSR613JPW.Snoo.adult_whole-fly_site-specific-recombination_insertion_FBgn0085450_ENCFF698UUX
ENCSR615RMC.D19B.adult_whole-fly_site-specific-recombination_insertion_FBgn0022699	ENCSR615RMC	D19B	FBgn0022699	adult	whole-fly	NA	whole-fly,site-specific-recombination,insertion	FALSE	FALSE	remap2022_ENCSR615RMC.D19B.adult_whole-fly_site-specific-recombination_insertion_FBgn0022699_ENCFF513MUL,remap2022_ENCSR615RMC.D19B.adult_whole-fly_site-specific-recombination_insertion_FBgn0022699_ENCFF265URJ,remap2022_ENCSR615RMC.D19B.adult_whole-fly_site-specific-recombination_insertion_FBgn0022699_ENCFF189FHS,remap2022_ENCSR615RMC.D19B.adult_whole-fly_site-specific-recombination_insertion_FBg…
ENCSR615RMC.D19B.adult_whole-fly_site-specific-recombination_insertion_FBgn0022699	ENCSR615RMC	D19B	FBgn0022699	adult	whole-fly	NA	whole-fly,site-specific-recombination,insertion	FALSE	FALSE	remap2022_ENCSR615RMC.D19B.adult_whole-fly_site-specific-recombination_insertion_FBgn0022699_ENCFF513MUL,remap2022_ENCSR615RMC.D19B.adult_whole-fly_site-specific-recombination_insertion_FBgn0022699_ENCFF265URJ,remap2022_ENCSR615RMC.D19B.adult_whole-fly_site-specific-recombination_insertion_FBgn0022699_ENCFF189FHS,remap2022_ENCSR615RMC.D19B.adult_whole-fly_site-specific-recombination_insertion_FBg…
ENCSR615RMC.D19B.adult_whole-fly_site-specific-recombination_insertion_FBgn0022699	ENCSR615RMC	D19B	FBgn0022699	adult	whole-fly	NA	whole-fly,site-specific-recombination,insertion	FALSE	FALSE	remap2022_ENCSR615RMC.D19B.adult_whole-fly_site-specific-recombination_insertion_FBgn0022699_ENCFF513MUL,remap2022_ENCSR615RMC.D19B.adult_whole-fly_site-specific-recombination_insertion_FBgn0022699_ENCFF265URJ,remap2022_ENCSR615RMC.D19B.adult_whole-fly_site-specific-recombination_insertion_FBgn0022699_ENCFF189FHS,remap2022_ENCSR615RMC.D19B.adult_whole-fly_site-specific-recombination_insertion_FBg…
ENCSR615RMC.D19B.adult_whole-fly_site-specific-recombination_insertion_FBgn0022699	ENCSR615RMC	D19B	FBgn0022699	adult	whole-fly	NA	whole-fly,site-specific-recombination,insertion	FALSE	FALSE	remap2022_ENCSR615RMC.D19B.adult_whole-fly_site-specific-recombination_insertion_FBgn0022699_ENCFF513MUL,remap2022_ENCSR615RMC.D19B.adult_whole-fly_site-specific-recombination_insertion_FBgn0022699_ENCFF265URJ,remap2022_ENCSR615RMC.D19B.adult_whole-fly_site-specific-recombination_insertion_FBgn0022699_ENCFF189FHS,remap2022_ENCSR615RMC.D19B.adult_whole-fly_site-specific-recombination_insertion_FBg…
ENCSR619HLP.CG8944.adult_whole-fly_site-specific-recombination_insertion_FBgn0030680	ENCSR619HLP	CG8944	FBgn0030680	adult	whole-fly	NA	whole-fly,site-specific-recombination,insertion	FALSE	FALSE	remap2022_ENCSR619HLP.CG8944.adult_whole-fly_site-specific-recombination_insertion_FBgn0030680_ENCFF915BYG,remap2022_ENCSR619HLP.CG8944.adult_whole-fly_site-specific-recombination_insertion_FBgn0030680_ENCFF693RXE,remap2022_ENCSR619HLP.CG8944.adult_whole-fly_site-specific-recombination_insertion_FBgn0030680_ENCFF764RHX
ENCSR619HLP.CG8944.adult_whole-fly_site-specific-recombination_insertion_FBgn0030680	ENCSR619HLP	CG8944	FBgn0030680	adult	whole-fly	NA	whole-fly,site-specific-recombination,insertion	FALSE	FALSE	remap2022_ENCSR619HLP.CG8944.adult_whole-fly_site-specific-recombination_insertion_FBgn0030680_ENCFF915BYG,remap2022_ENCSR619HLP.CG8944.adult_whole-fly_site-specific-recombination_insertion_FBgn0030680_ENCFF693RXE,remap2022_ENCSR619HLP.CG8944.adult_whole-fly_site-specific-recombination_insertion_FBgn0030680_ENCFF764RHX
ENCSR619HLP.CG8944.adult_whole-fly_site-specific-recombination_insertion_FBgn0030680	ENCSR619HLP	CG8944	FBgn0030680	adult	whole-fly	NA	whole-fly,site-specific-recombination,insertion	FALSE	FALSE	remap2022_ENCSR619HLP.CG8944.adult_whole-fly_site-specific-recombination_insertion_FBgn0030680_ENCFF915BYG,remap2022_ENCSR619HLP.CG8944.adult_whole-fly_site-specific-recombination_insertion_FBgn0030680_ENCFF693RXE,remap2022_ENCSR619HLP.CG8944.adult_whole-fly_site-specific-recombination_insertion_FBgn0030680_ENCFF764RHX
ENCSR621PCK.gfzf.adult_whole-fly_site-specific-recombination_insertion_FBgn0250732	ENCSR621PCK	gfzf	FBgn0250732	adult	whole-fly	NA	whole-fly,site-specific-recombination,insertion	FALSE	FALSE	remap2022_ENCSR621PCK.gfzf.adult_whole-fly_site-specific-recombination_insertion_FBgn0250732_ENCFF186OFE,remap2022_ENCSR621PCK.gfzf.adult_whole-fly_site-specific-recombination_insertion_FBgn0250732_ENCFF293XHC
ENCSR621PCK.gfzf.adult_whole-fly_site-specific-recombination_insertion_FBgn0250732	ENCSR621PCK	gfzf	FBgn0250732	adult	whole-fly	NA	whole-fly,site-specific-recombination,insertion	FALSE	FALSE	remap2022_ENCSR621PCK.gfzf.adult_whole-fly_site-specific-recombination_insertion_FBgn0250732_ENCFF186OFE,remap2022_ENCSR621PCK.gfzf.adult_whole-fly_site-specific-recombination_insertion_FBgn0250732_ENCFF293XHC
ENCSR624PKN.CG9727.adult_whole-fly_site-specific-recombination_insertion_FBgn0037445	ENCSR624PKN	CG9727	FBgn0037445	adult	whole-fly	NA	whole-fly,site-specific-recombination,insertion	FALSE	FALSE	remap2022_ENCSR624PKN.CG9727.adult_whole-fly_site-specific-recombination_insertion_FBgn0037445_ENCFF057PKR,remap2022_ENCSR624PKN.CG9727.adult_whole-fly_site-specific-recombination_insertion_FBgn0037445_ENCFF968XCZ,remap2022_ENCSR624PKN.CG9727.adult_whole-fly_site-specific-recombination_insertion_FBgn0037445_ENCFF101OXX
ENCSR624PKN.CG9727.adult_whole-fly_site-specific-recombination_insertion_FBgn0037445	ENCSR624PKN	CG9727	FBgn0037445	adult	whole-fly	NA	whole-fly,site-specific-recombination,insertion	FALSE	FALSE	remap2022_ENCSR624PKN.CG9727.adult_whole-fly_site-specific-recombination_insertion_FBgn0037445_ENCFF057PKR,remap2022_ENCSR624PKN.CG9727.adult_whole-fly_site-specific-recombination_insertion_FBgn0037445_ENCFF968XCZ,remap2022_ENCSR624PKN.CG9727.adult_whole-fly_site-specific-recombination_insertion_FBgn0037445_ENCFF101OXX
ENCSR624PKN.CG9727.adult_whole-fly_site-specific-recombination_insertion_FBgn0037445	ENCSR624PKN	CG9727	FBgn0037445	adult	whole-fly	NA	whole-fly,site-specific-recombination,insertion	FALSE	FALSE	remap2022_ENCSR624PKN.CG9727.adult_whole-fly_site-specific-recombination_insertion_FBgn0037445_ENCFF057PKR,remap2022_ENCSR624PKN.CG9727.adult_whole-fly_site-specific-recombination_insertion_FBgn0037445_ENCFF968XCZ,remap2022_ENCSR624PKN.CG9727.adult_whole-fly_site-specific-recombination_insertion_FBgn0037445_ENCFF101OXX
ENCSR629WQT.Trl.adult_whole-fly_site-specific-recombination_insertion_FBgn0013263	ENCSR629WQT	Trl	FBgn0013263	adult	whole-fly	NA	whole-fly,site-specific-recombination,insertion	FALSE	FALSE	remap2022_ENCSR629WQT.Trl.adult_whole-fly_site-specific-recombination_insertion_FBgn0013263_ENCFF097AIN,remap2022_ENCSR629WQT.Trl.adult_whole-fly_site-specific-recombination_insertion_FBgn0013263_ENCFF383LLP,remap2022_ENCSR629WQT.Trl.adult_whole-fly_site-specific-recombination_insertion_FBgn0013263_ENCFF481BWD
ENCSR629WQT.Trl.adult_whole-fly_site-specific-recombination_insertion_FBgn0013263	ENCSR629WQT	Trl	FBgn0013263	adult	whole-fly	NA	whole-fly,site-specific-recombination,insertion	FALSE	FALSE	remap2022_ENCSR629WQT.Trl.adult_whole-fly_site-specific-recombination_insertion_FBgn0013263_ENCFF097AIN,remap2022_ENCSR629WQT.Trl.adult_whole-fly_site-specific-recombination_insertion_FBgn0013263_ENCFF383LLP,remap2022_ENCSR629WQT.Trl.adult_whole-fly_site-specific-recombination_insertion_FBgn0013263_ENCFF481BWD
ENCSR629WQT.Trl.adult_whole-fly_site-specific-recombination_insertion_FBgn0013263	ENCSR629WQT	Trl	FBgn0013263	adult	whole-fly	NA	whole-fly,site-specific-recombination,insertion	FALSE	FALSE	remap2022_ENCSR629WQT.Trl.adult_whole-fly_site-specific-recombination_insertion_FBgn0013263_ENCFF097AIN,remap2022_ENCSR629WQT.Trl.adult_whole-fly_site-specific-recombination_insertion_FBgn0013263_ENCFF383LLP,remap2022_ENCSR629WQT.Trl.adult_whole-fly_site-specific-recombination_insertion_FBgn0013263_ENCFF481BWD
ENCSR631PLV.fru.adult_whole-fly_site-specific-recombination_insertion_FBgn0004652	ENCSR631PLV	fru	FBgn0004652	adult	whole-fly	NA	whole-fly,site-specific-recombination,insertion	FALSE	FALSE	remap2022_ENCSR631PLV.fru.adult_whole-fly_site-specific-recombination_insertion_FBgn0004652_ENCFF780NKK,remap2022_ENCSR631PLV.fru.adult_whole-fly_site-specific-recombination_insertion_FBgn0004652_ENCFF608QBA,remap2022_ENCSR631PLV.fru.adult_whole-fly_site-specific-recombination_insertion_FBgn0004652_ENCFF085EVE
ENCSR631PLV.fru.adult_whole-fly_site-specific-recombination_insertion_FBgn0004652	ENCSR631PLV	fru	FBgn0004652	adult	whole-fly	NA	whole-fly,site-specific-recombination,insertion	FALSE	FALSE	remap2022_ENCSR631PLV.fru.adult_whole-fly_site-specific-recombination_insertion_FBgn0004652_ENCFF780NKK,remap2022_ENCSR631PLV.fru.adult_whole-fly_site-specific-recombination_insertion_FBgn0004652_ENCFF608QBA,remap2022_ENCSR631PLV.fru.adult_whole-fly_site-specific-recombination_insertion_FBgn0004652_ENCFF085EVE
ENCSR631PLV.fru.adult_whole-fly_site-specific-recombination_insertion_FBgn0004652	ENCSR631PLV	fru	FBgn0004652	adult	whole-fly	NA	whole-fly,site-specific-recombination,insertion	FALSE	FALSE	remap2022_ENCSR631PLV.fru.adult_whole-fly_site-specific-recombination_insertion_FBgn0004652_ENCFF780NKK,remap2022_ENCSR631PLV.fru.adult_whole-fly_site-specific-recombination_insertion_FBgn0004652_ENCFF608QBA,remap2022_ENCSR631PLV.fru.adult_whole-fly_site-specific-recombination_insertion_FBgn0004652_ENCFF085EVE
ENCSR633IKC.Ssrp.adult_whole-fly_site-specific-recombination_insertion_FBgn0010278	ENCSR633IKC	Ssrp	FBgn0010278	adult	whole-fly	NA	whole-fly,site-specific-recombination,insertion	FALSE	FALSE	remap2022_ENCSR633IKC.Ssrp.adult_whole-fly_site-specific-recombination_insertion_FBgn0010278_ENCFF990PCM,remap2022_ENCSR633IKC.Ssrp.adult_whole-fly_site-specific-recombination_insertion_FBgn0010278_ENCFF766ONG
ENCSR633IKC.Ssrp.adult_whole-fly_site-specific-recombination_insertion_FBgn0010278	ENCSR633IKC	Ssrp	FBgn0010278	adult	whole-fly	NA	whole-fly,site-specific-recombination,insertion	FALSE	FALSE	remap2022_ENCSR633IKC.Ssrp.adult_whole-fly_site-specific-recombination_insertion_FBgn0010278_ENCFF990PCM,remap2022_ENCSR633IKC.Ssrp.adult_whole-fly_site-specific-recombination_insertion_FBgn0010278_ENCFF766ONG
ENCSR636FRF.pan.adult_whole-fly_FBgn0085432	ENCSR636FRF	pan	FBgn0085432	adult	whole-fly	NA	whole-fly	FALSE	FALSE	remap2022_ENCSR636FRF.pan.adult_whole-fly_FBgn0085432_ENCFF509JTJ,remap2022_ENCSR636FRF.pan.adult_whole-fly_FBgn0085432_ENCFF994OSM,remap2022_ENCSR636FRF.pan.adult_whole-fly_FBgn0085432_ENCFF374HTX
ENCSR636FRF.pan.adult_whole-fly_FBgn0085432	ENCSR636FRF	pan	FBgn0085432	adult	whole-fly	NA	whole-fly	FALSE	FALSE	remap2022_ENCSR636FRF.pan.adult_whole-fly_FBgn0085432_ENCFF509JTJ,remap2022_ENCSR636FRF.pan.adult_whole-fly_FBgn0085432_ENCFF994OSM,remap2022_ENCSR636FRF.pan.adult_whole-fly_FBgn0085432_ENCFF374HTX
ENCSR636FRF.pan.adult_whole-fly_FBgn0085432	ENCSR636FRF	pan	FBgn0085432	adult	whole-fly	NA	whole-fly	FALSE	FALSE	remap2022_ENCSR636FRF.pan.adult_whole-fly_FBgn0085432_ENCFF509JTJ,remap2022_ENCSR636FRF.pan.adult_whole-fly_FBgn0085432_ENCFF994OSM,remap2022_ENCSR636FRF.pan.adult_whole-fly_FBgn0085432_ENCFF374HTX
ENCSR636TIL.maf-S.adult_whole-fly_site-specific-recombination_insertion_FBgn0034534	ENCSR636TIL	maf-S	FBgn0034534	adult	whole-fly	NA	whole-fly,site-specific-recombination,insertion	FALSE	FALSE	remap2022_ENCSR636TIL.maf-S.adult_whole-fly_site-specific-recombination_insertion_FBgn0034534_ENCFF613ZRP,remap2022_ENCSR636TIL.maf-S.adult_whole-fly_site-specific-recombination_insertion_FBgn0034534_ENCFF381TRN
ENCSR636TIL.maf-S.adult_whole-fly_site-specific-recombination_insertion_FBgn0034534	ENCSR636TIL	maf-S	FBgn0034534	adult	whole-fly	NA	whole-fly,site-specific-recombination,insertion	FALSE	FALSE	remap2022_ENCSR636TIL.maf-S.adult_whole-fly_site-specific-recombination_insertion_FBgn0034534_ENCFF613ZRP,remap2022_ENCSR636TIL.maf-S.adult_whole-fly_site-specific-recombination_insertion_FBgn0034534_ENCFF381TRN
ENCSR637FPY.slou.adult_whole-fly_site-specific-recombination_insertion_FBgn0002941	ENCSR637FPY	slou	FBgn0002941	adult	whole-fly	NA	whole-fly,site-specific-recombination,insertion	FALSE	FALSE	remap2022_ENCSR637FPY.slou.adult_whole-fly_site-specific-recombination_insertion_FBgn0002941_ENCFF415SNY,remap2022_ENCSR637FPY.slou.adult_whole-fly_site-specific-recombination_insertion_FBgn0002941_ENCFF372BZO,remap2022_ENCSR637FPY.slou.adult_whole-fly_site-specific-recombination_insertion_FBgn0002941_ENCFF232FOF
ENCSR637FPY.slou.adult_whole-fly_site-specific-recombination_insertion_FBgn0002941	ENCSR637FPY	slou	FBgn0002941	adult	whole-fly	NA	whole-fly,site-specific-recombination,insertion	FALSE	FALSE	remap2022_ENCSR637FPY.slou.adult_whole-fly_site-specific-recombination_insertion_FBgn0002941_ENCFF415SNY,remap2022_ENCSR637FPY.slou.adult_whole-fly_site-specific-recombination_insertion_FBgn0002941_ENCFF372BZO,remap2022_ENCSR637FPY.slou.adult_whole-fly_site-specific-recombination_insertion_FBgn0002941_ENCFF232FOF
ENCSR637FPY.slou.adult_whole-fly_site-specific-recombination_insertion_FBgn0002941	ENCSR637FPY	slou	FBgn0002941	adult	whole-fly	NA	whole-fly,site-specific-recombination,insertion	FALSE	FALSE	remap2022_ENCSR637FPY.slou.adult_whole-fly_site-specific-recombination_insertion_FBgn0002941_ENCFF415SNY,remap2022_ENCSR637FPY.slou.adult_whole-fly_site-specific-recombination_insertion_FBgn0002941_ENCFF372BZO,remap2022_ENCSR637FPY.slou.adult_whole-fly_site-specific-recombination_insertion_FBgn0002941_ENCFF232FOF
ENCSR637GDK.Su-var-2-10.adult_whole-fly_site-specific-recombination_insertion_FBgn0003612	ENCSR637GDK	Su-var-2-10	FBgn0003612	adult	whole-fly	NA	whole-fly,site-specific-recombination,insertion	FALSE	FALSE	remap2022_ENCSR637GDK.Su-var-2-10.adult_whole-fly_site-specific-recombination_insertion_FBgn0003612_ENCFF305VYG,remap2022_ENCSR637GDK.Su-var-2-10.adult_whole-fly_site-specific-recombination_insertion_FBgn0003612_ENCFF984GML
ENCSR637GDK.Su-var-2-10.adult_whole-fly_site-specific-recombination_insertion_FBgn0003612	ENCSR637GDK	Su-var-2-10	FBgn0003612	adult	whole-fly	NA	whole-fly,site-specific-recombination,insertion	FALSE	FALSE	remap2022_ENCSR637GDK.Su-var-2-10.adult_whole-fly_site-specific-recombination_insertion_FBgn0003612_ENCFF305VYG,remap2022_ENCSR637GDK.Su-var-2-10.adult_whole-fly_site-specific-recombination_insertion_FBgn0003612_ENCFF984GML
ENCSR641KZS.E-spl-m5-HLH.adult_whole-fly_site-specific-recombination_insertion_FBgn0002631	ENCSR641KZS	E-spl-m5-HLH	FBgn0002631	adult	whole-fly	NA	whole-fly,site-specific-recombination,insertion	FALSE	FALSE	remap2022_ENCSR641KZS.E-spl-m5-HLH.adult_whole-fly_site-specific-recombination_insertion_FBgn0002631_ENCFF694NLJ,remap2022_ENCSR641KZS.E-spl-m5-HLH.adult_whole-fly_site-specific-recombination_insertion_FBgn0002631_ENCFF929JEN
ENCSR641KZS.E-spl-m5-HLH.adult_whole-fly_site-specific-recombination_insertion_FBgn0002631	ENCSR641KZS	E-spl-m5-HLH	FBgn0002631	adult	whole-fly	NA	whole-fly,site-specific-recombination,insertion	FALSE	FALSE	remap2022_ENCSR641KZS.E-spl-m5-HLH.adult_whole-fly_site-specific-recombination_insertion_FBgn0002631_ENCFF694NLJ,remap2022_ENCSR641KZS.E-spl-m5-HLH.adult_whole-fly_site-specific-recombination_insertion_FBgn0002631_ENCFF929JEN
ENCSR643EOU.l-3-neo38.adult_whole-fly_site-specific-recombination_insertion_FBgn0265276	ENCSR643EOU	l-3-neo38	FBgn0265276	adult	whole-fly	NA	whole-fly,site-specific-recombination,insertion	FALSE	FALSE	remap2022_ENCSR643EOU.l-3-neo38.adult_whole-fly_site-specific-recombination_insertion_FBgn0265276_ENCFF086ZSJ,remap2022_ENCSR643EOU.l-3-neo38.adult_whole-fly_site-specific-recombination_insertion_FBgn0265276_ENCFF636HDD
ENCSR643EOU.l-3-neo38.adult_whole-fly_site-specific-recombination_insertion_FBgn0265276	ENCSR643EOU	l-3-neo38	FBgn0265276	adult	whole-fly	NA	whole-fly,site-specific-recombination,insertion	FALSE	FALSE	remap2022_ENCSR643EOU.l-3-neo38.adult_whole-fly_site-specific-recombination_insertion_FBgn0265276_ENCFF086ZSJ,remap2022_ENCSR643EOU.l-3-neo38.adult_whole-fly_site-specific-recombination_insertion_FBgn0265276_ENCFF636HDD
ENCSR643MOM.odd.adult_whole-fly_site-specific-recombination_insertion_FBgn0002985	ENCSR643MOM	odd	FBgn0002985	adult	whole-fly	NA	whole-fly,site-specific-recombination,insertion	FALSE	FALSE	remap2022_ENCSR643MOM.odd.adult_whole-fly_site-specific-recombination_insertion_FBgn0002985_ENCFF106IYI,remap2022_ENCSR643MOM.odd.adult_whole-fly_site-specific-recombination_insertion_FBgn0002985_ENCFF007AAS
ENCSR643MOM.odd.adult_whole-fly_site-specific-recombination_insertion_FBgn0002985	ENCSR643MOM	odd	FBgn0002985	adult	whole-fly	NA	whole-fly,site-specific-recombination,insertion	FALSE	FALSE	remap2022_ENCSR643MOM.odd.adult_whole-fly_site-specific-recombination_insertion_FBgn0002985_ENCFF106IYI,remap2022_ENCSR643MOM.odd.adult_whole-fly_site-specific-recombination_insertion_FBgn0002985_ENCFF007AAS
ENCSR645UUT.CG12219.adult_whole-fly_site-specific-recombination_insertion_FBgn0043796	ENCSR645UUT	CG12219	FBgn0043796	adult	whole-fly	NA	whole-fly,site-specific-recombination,insertion	FALSE	FALSE	remap2022_ENCSR645UUT.CG12219.adult_whole-fly_site-specific-recombination_insertion_FBgn0043796_ENCFF922XSE,remap2022_ENCSR645UUT.CG12219.adult_whole-fly_site-specific-recombination_insertion_FBgn0043796_ENCFF229JLG,remap2022_ENCSR645UUT.CG12219.adult_whole-fly_site-specific-recombination_insertion_FBgn0043796_ENCFF121JNW
ENCSR645UUT.CG12219.adult_whole-fly_site-specific-recombination_insertion_FBgn0043796	ENCSR645UUT	CG12219	FBgn0043796	adult	whole-fly	NA	whole-fly,site-specific-recombination,insertion	FALSE	FALSE	remap2022_ENCSR645UUT.CG12219.adult_whole-fly_site-specific-recombination_insertion_FBgn0043796_ENCFF922XSE,remap2022_ENCSR645UUT.CG12219.adult_whole-fly_site-specific-recombination_insertion_FBgn0043796_ENCFF229JLG,remap2022_ENCSR645UUT.CG12219.adult_whole-fly_site-specific-recombination_insertion_FBgn0043796_ENCFF121JNW
ENCSR645UUT.CG12219.adult_whole-fly_site-specific-recombination_insertion_FBgn0043796	ENCSR645UUT	CG12219	FBgn0043796	adult	whole-fly	NA	whole-fly,site-specific-recombination,insertion	FALSE	FALSE	remap2022_ENCSR645UUT.CG12219.adult_whole-fly_site-specific-recombination_insertion_FBgn0043796_ENCFF922XSE,remap2022_ENCSR645UUT.CG12219.adult_whole-fly_site-specific-recombination_insertion_FBgn0043796_ENCFF229JLG,remap2022_ENCSR645UUT.CG12219.adult_whole-fly_site-specific-recombination_insertion_FBgn0043796_ENCFF121JNW
ENCSR648YVN.CG3163.adult_whole-fly_site-specific-recombination_insertion_FBgn0034961	ENCSR648YVN	CG3163	FBgn0034961	adult	whole-fly	NA	whole-fly,site-specific-recombination,insertion	FALSE	FALSE	remap2022_ENCSR648YVN.CG3163.adult_whole-fly_site-specific-recombination_insertion_FBgn0034961_ENCFF288PSQ,remap2022_ENCSR648YVN.CG3163.adult_whole-fly_site-specific-recombination_insertion_FBgn0034961_ENCFF582PTB,remap2022_ENCSR648YVN.CG3163.adult_whole-fly_site-specific-recombination_insertion_FBgn0034961_ENCFF882RKK
ENCSR648YVN.CG3163.adult_whole-fly_site-specific-recombination_insertion_FBgn0034961	ENCSR648YVN	CG3163	FBgn0034961	adult	whole-fly	NA	whole-fly,site-specific-recombination,insertion	FALSE	FALSE	remap2022_ENCSR648YVN.CG3163.adult_whole-fly_site-specific-recombination_insertion_FBgn0034961_ENCFF288PSQ,remap2022_ENCSR648YVN.CG3163.adult_whole-fly_site-specific-recombination_insertion_FBgn0034961_ENCFF582PTB,remap2022_ENCSR648YVN.CG3163.adult_whole-fly_site-specific-recombination_insertion_FBgn0034961_ENCFF882RKK
ENCSR648YVN.CG3163.adult_whole-fly_site-specific-recombination_insertion_FBgn0034961	ENCSR648YVN	CG3163	FBgn0034961	adult	whole-fly	NA	whole-fly,site-specific-recombination,insertion	FALSE	FALSE	remap2022_ENCSR648YVN.CG3163.adult_whole-fly_site-specific-recombination_insertion_FBgn0034961_ENCFF288PSQ,remap2022_ENCSR648YVN.CG3163.adult_whole-fly_site-specific-recombination_insertion_FBgn0034961_ENCFF582PTB,remap2022_ENCSR648YVN.CG3163.adult_whole-fly_site-specific-recombination_insertion_FBgn0034961_ENCFF882RKK
[truncated: 1,773 more rows]

## Sheet: README
Supplemental Table S5: ReMap 2022 full dataset metatable
[truncated: 1 more rows]
