# Supplementary material for: Integrating genetic variation with deep learning provides context for variants impacting transcription factor binding during embryogenesis
Source: Genome Res. 2025 May;35(5):1138–53. doi: 10.1101/gr.279652.124 (PMC12047541; doi:10.1101/gr.279652.124)
Supplement: Supplement 6 [file Supplemental_Table_S6.xlsx]

## Sheet: Sheet1
condition	variant_ID	peak_ID	REF	ALT	AI	Basenji_AI	padjust	overlaps_motif	overlaps_peak	overlaps_TSS	TSS	correct_predict	Basenji_predict	Any_motif	Self_motif	Cofactor_motif	Variant_in_self_motif	Variant_in_other_motif	Potential_cofactors	Cofactor_sequences
twi.24	chr2L:12242883	chr2L_12242905_twi/24	A	C	0.384	0.318	0.000	no_overlap	overlaps_peak	no_TSS	Distal	correct	yes	yes	no	yes	no	no
twi.24	chr2L:14662945	chr2L_14663042_twi/24	C	G	0.827	0.617	0.000	no_overlap	overlaps_peak	no_TSS	Distal	correct	yes	yes	yes	yes	no	no	Mef2
twi.24	chr2L:17227347	chr2L_17227263_twi/24	G	A	0.299	0.313	0.000	no_overlap	overlaps_peak	no_TSS	Distal	correct	yes	yes	yes	yes	no	yes	Mef2
twi.24	chr2L:19181340	chr2L_19181335_twi/24	A	G	0.392	0.390	0.000	no_overlap	overlaps_peak	TSS	Proximal	correct	partially	no	no	no	no	no
twi.24	chr2L:19912249	chr2L_19911885_twi/24	G	A	0.268	0.620	0.000	no_overlap	no_overlap	TSS	Proximal	incorrect	yes	yes	no	yes	no	yes
twi.24	chr2L:22037095	chr2L_22037073_twi/24	A	C	0.654	0.386	0.000	no_overlap	overlaps_peak	no_TSS	Distal	incorrect	yes	yes	no	yes	no	no
twi.24	chr2L:9013245	chr2L_9013253_twi/24	C	T	0.258	0.197	0.000	overlaps_motif	overlaps_peak	no_TSS	Distal	correct	partially	no	no	no	no	no
twi.24	chr2R:11182905	chr2R_11182769_twi/24	C	T	0.386	0.394	0.000	no_overlap	overlaps_peak	TSS	Proximal	correct	yes	yes	no	yes	no	yes
twi.24	chr2R:11868246	chr2R_11868286_twi/24	A	G	0.672	0.769	0.000	no_overlap	overlaps_peak	no_TSS	Distal	correct	yes	yes	yes	yes	no	yes	Erg	CAGGTAG
twi.24	chr2R:18531880	chr2R_18531864_twi/24	T	A	0.624	0.739	0.000	no_overlap	overlaps_peak	no_TSS	Distal	correct	yes	yes	no	yes	no	no	Erg	CTACCTG
twi.24	chr2R:20698461	chr2R_20698462_twi/24	G	A	0.638	0.385	0.000	overlaps_motif	overlaps_peak	TSS	Proximal	incorrect	yes	no	no	no	no	no
twi.24	chr2R:20870343	chr2R_20870397_twi/24	C	T	0.712	0.620	0.000	no_overlap	overlaps_peak	TSS	Proximal	correct	yes	yes	no	yes	no	no	CTCF
twi.24	chr2R:21454932	chr2R_21455142_twi/24	T	G	0.398	0.304	0.000	no_overlap	overlaps_peak	no_TSS	Distal	correct	yes	no	no	no	no	no
twi.24	chr2R:24615958	chr2R_24616195_twi/24	C	T	0.643	0.385	0.001	no_overlap	overlaps_peak	no_TSS	Distal	incorrect	yes	yes	no	yes	no	no
twi.24	chr3L:11316755	chr3L_11316784_twi/24	C	T	0.356	0.373	0.000	overlaps_motif	overlaps_peak	no_TSS	Distal	correct	yes	yes	yes	yes	yes	no	Elf	GCAACCCCGGAAAAAT
twi.24	chr3L:11684393	chr3L_11684449_twi/24	G	A	0.380	0.383	0.000	no_overlap	overlaps_peak	TSS	Proximal	correct	yes	yes	no	yes	no	yes		TTCCAATTGGAG
twi.24	chr3L:14338986	chr3L_14339047_twi/24	A	C	0.613	0.618	0.000	no_overlap	overlaps_peak	no_TSS	Distal	correct	yes	yes	no	yes	no	no	Erg	CAGGTA
twi.24	chr3L:1488661	chr3L_1488694_twi/24	T	G	0.210	0.347	0.000	no_overlap	overlaps_peak	TSS	Proximal	correct	yes	yes	yes	yes	no	no	CTCF	CCAAGTGGATCC
twi.24	chr3L:16835339	chr3L_16835437_twi/24	T	C	0.669	0.644	0.000	no_overlap	overlaps_peak	no_TSS	Distal	correct	yes	yes	no	yes	no	no	Pouf3f1	TTAATTAA
twi.24	chr3L:22680370	chr3L_22680399_twi/24	T	C	0.313	0.400	0.000	no_overlap	overlaps_peak	no_TSS	Distal	correct	yes	yes	yes	no	no	no
twi.24	chr3L:5929640	chr3L_5929523_twi/24	G	A	0.616	0.619	0.000	no_overlap	overlaps_peak	no_TSS	Distal	correct	yes	yes	no	yes	no	no	Erg	CTACCTG
twi.24	chr3R:10535887	chr3R_10535924_twi/24	A	G	0.667	0.618	0.003	no_overlap	overlaps_peak	no_TSS	Distal	correct	yes	no	no	no	no	no
twi.24	chr3R:12375570	chr3R_12375412_twi/24	C	A	0.310	0.349	0.006	no_overlap	overlaps_peak	TSS	Proximal	correct	yes	yes	yes	yes	no	yes	Foxg1, PAX5	CGGTCACACT
twi.24	chr3R:13149758	chr3R_13149982_twi/24	T	A	0.682	0.754	0.000	no_overlap	overlaps_peak	no_TSS	Distal	correct	yes	no	no	no	no	no
twi.24	chr3R:15233951	chr3R_15233910_twi/24	C	A	0.653	0.369	0.000	no_overlap	overlaps_peak	no_TSS	Distal	incorrect	partially	no	no	no	no	no
twi.24	chr3R:16958474	chr3R_16958515_twi/24	C	G	0.660	0.630	0.000	no_overlap	overlaps_peak	no_TSS	Distal	correct	yes	yes	no	yes	no	no
twi.24	chr3R:19641343	chr3R_19641388_twi/24	T	C	0.616	0.618	0.002	no_overlap	overlaps_peak	TSS	Proximal	correct	yes	yes	yes	no	no	no
twi.24	chr3R:19988477	chr3R_19988569_twi/24	C	T	0.372	0.359	0.000	no_overlap	overlaps_peak	no_TSS	Distal	correct	yes	no	no	no	no	no
twi.24	chr3R:30723943	chr3R_30724038_twi/24	A	C	0.662	0.627	0.000	no_overlap	overlaps_peak	no_TSS	Distal	correct	yes	yes	no	yes	no	yes	REL	GGGAAAAACCCA
twi.24	chr3R:30797713	chr3R_30797716_twi/24	C	T	0.701	0.694	0.000	no_overlap	overlaps_peak	no_TSS	Distal	correct	partially	no	no	no	no	no
twi.24	chr3R:31954775	chr3R_31954696_twi/24	G	C	0.622	0.646	0.000	no_overlap	overlaps_peak	no_TSS	Distal	correct	yes	no	no	no	no	no
twi.24	chr3R:31956236	chr3R_31956227_twi/24	T	C	0.664	0.618	0.000	no_overlap	overlaps_peak	no_TSS	Distal	correct	yes	yes	no	yes	no	yes	Erg	CAGGTA
bin.68	chr2L:10457707	chr2L_10457771_bin/68	T	C	0.376	0.394	0.001	no_overlap	overlaps_peak	TSS	Proximal	correct	yes	yes	no	yes	no	yes		GAACTTT
bin.68	chr2L:14337531	chr2L_14337479_bin/68	A	C	0.276	0.600	0.003	no_overlap	overlaps_peak	no_TSS	Distal	incorrect	yes	yes	yes	no	no	no
bin.68	chr2R:20443870	chr2R_20443775_bin/68	G	T	0.383	0.383	0.000	no_overlap	overlaps_peak	no_TSS	Distal	correct	yes	yes	yes	no	no	no
bin.68	chr2R:21585789	chr2R_21585765_bin/68	A	G	0.714	0.714	0.000	overlaps_motif	overlaps_peak	no_TSS	Distal	correct	yes	yes	yes	no	yes	no
bin.68	chr3L:22232197	chr3L_22232188_bin/68	A	T	0.732	0.748	0.000	overlaps_motif	overlaps_peak	no_TSS	Distal	correct	yes	yes	yes	yes	yes	yes
bin.68	chr3L:4840075	chr3L_4840132_bin/68	C	A	0.611	0.631	0.000	no_overlap	overlaps_peak	TSS	Proximal	correct	yes	yes	no	yes	no	yes	twi	ACATGT
bin.68	chr3R:19641343	chr3R_19641417_bin/68	T	C	0.680	0.650	0.000	no_overlap	overlaps_peak	TSS	Proximal	correct	yes	yes	yes	yes	no	no	twi	CACATGT
bin.68	chr3R:6992041	chr3R_6992096_bin/68	A	G	0.732	0.629	0.000	overlaps_motif	overlaps_peak	no_TSS	Distal	correct	yes	yes	yes	yes	yes	no		TCCGAAATAGT
bin.68	chr3R:7929120	chr3R_7929038_bin/68	G	T	0.342	0.359	0.005	no_overlap	overlaps_peak	no_TSS	Distal	correct	partially	no	no	no	no	no
ctcf.68	chr2L:10986190	chr2L_10986211_ctcf/68	A	G	0.705	0.613	0.000	overlaps_motif	overlaps_peak	no_TSS	Distal	correct	no	no	no	no	no	no
ctcf.68	chr2L:1183874	chr2L_1183872_ctcf/68	C	T	0.895	0.901	0.000	overlaps_motif	overlaps_peak	TSS	Proximal	correct	yes	yes	yes	no	yes	no
ctcf.68	chr2L:12086003	chr2L_12085994_ctcf/68	C	T	0.805	0.703	0.000	overlaps_motif	overlaps_peak	TSS	Proximal	correct	no	no	no	no	no	no
ctcf.68	chr2L:13003802	chr2L_13003803_ctcf/68	C	A	0.611	0.605	0.000	overlaps_motif	overlaps_peak	TSS	Proximal	correct	yes	yes	yes	no	yes	no
ctcf.68	chr2L:131233	chr2L_131248_ctcf/68	T	G	0.362	0.393	0.000	no_overlap	overlaps_peak	TSS	Proximal	correct	yes	yes	no	yes	no	no	Znf418	GCCTAAAAGT
ctcf.68	chr2L:14581345	chr2L_14581389_ctcf/68	A	G	0.332	0.385	0.000	overlaps_motif	overlaps_peak	no_TSS	Distal	correct	yes	yes	yes	no	yes	no
ctcf.68	chr2L:1492039	chr2L_1491936_ctcf/68	G	A	0.678	0.760	0.000	overlaps_motif	overlaps_peak	TSS	Proximal	correct	no	no	no	no	no	no
ctcf.68	chr2L:16049747	chr2L_16049772_ctcf/68	T	A	0.665	0.625	0.000	no_overlap	overlaps_peak	TSS	Proximal	correct	yes	yes	no	yes	no	yes	Zscan31	AAGCAGTTCTCTTAGGC
ctcf.68	chr2L:17176985	chr2L_17176988_ctcf/68	T	C	0.147	0.280	0.000	overlaps_motif	overlaps_peak	TSS	Proximal	correct	yes	yes	yes	no	yes	no
ctcf.68	chr2L:17550815	chr2L_17550834_ctcf/68	G	A	0.934	0.989	0.000	overlaps_motif	overlaps_peak	no_TSS	Distal	correct	no	no	no	no	no	no
ctcf.68	chr2L:18284341	chr2L_18284342_ctcf/68	C	G	0.798	0.844	0.000	overlaps_motif	overlaps_peak	no_TSS	Distal	correct	yes	yes	yes	no	yes	no
ctcf.68	chr2L:19378774	chr2L_19378642_ctcf/68	G	A	0.799	0.776	0.000	no_overlap	overlaps_peak	no_TSS	Distal	correct	yes	yes	no	yes	no	yes	Elf	CCCCGAAAGTATGC
ctcf.68	chr2L:20488304	chr2L_20488296_ctcf/68	G	A	0.843	0.631	0.000	overlaps_motif	overlaps_peak	TSS	Proximal	correct	no	no	no	no	no	no
ctcf.68	chr2L:283302	chr2L_283230_ctcf/68	T	C	0.649	0.338	0.000	no_overlap	overlaps_peak	TSS	Proximal	incorrect	no	no	no	no	no	no
ctcf.68	chr2L:421567	chr2L_421575_ctcf/68	C	A	0.779	0.964	0.000	overlaps_motif	overlaps_peak	TSS	Proximal	correct	no	no	no	no	no	no
ctcf.68	chr2L:6357166	chr2L_6357095_ctcf/68	A	C	0.292	0.398	0.000	overlaps_motif	overlaps_peak	no_TSS	Distal	correct	no	no	no	no	no	no
ctcf.68	chr2L:7641770	chr2L_7641707_ctcf/68	T	A	0.360	0.911	0.000	overlaps_motif	overlaps_peak	no_TSS	Distal	incorrect	no	no	no	no	no	no
ctcf.68	chr2L:7809029	chr2L_7809033_ctcf/68	T	G	0.170	0.328	0.000	overlaps_motif	overlaps_peak	no_TSS	Distal	correct	no	no	no	no	no	no
ctcf.68	chr2L:8024524	chr2L_8024508_ctcf/68	C	A	1000	0.681	0.000	overlaps_motif	overlaps_peak	no_TSS	Distal	correct	no	no	no	no	no	no
ctcf.68	chr2L:887969	chr2L_887967_ctcf/68	C	T	0.765	0.803	0.000	overlaps_motif	overlaps_peak	no_TSS	Distal	correct	yes	yes	yes	yes	yes	no	Nrf1	GTGGCGTATGCGTAAT
ctcf.68	chr2R:10797726	chr2R_10797854_ctcf/68	T	C	0.392	0.399	0.000	no_overlap	overlaps_peak	no_TSS	Distal	correct	partially	no	no	no	no	no
ctcf.68	chr2R:12598612	chr2R_12598606_ctcf/68	G	A	0.854	0.990	0.000	overlaps_motif	overlaps_peak	no_TSS	Distal	correct	no	no	no	no	no	no
ctcf.68	chr2R:12898751	chr2R_12898759_ctcf/68	G	A	0.861	0.973	0.000	overlaps_motif	overlaps_peak	no_TSS	Distal	correct	yes	yes	yes	no	yes	no		CAGGTGGCGC
ctcf.68	chr2R:15733144	chr2R_15733151_ctcf/68	C	T	0.925	0.997	0.000	overlaps_motif	overlaps_peak	no_TSS	Distal	correct	yes	yes	yes	no	yes	no
ctcf.68	chr2R:16638293	chr2R_16638288_ctcf/68	G	C	0.639	0.623	0.000	overlaps_motif	overlaps_peak	TSS	Proximal	correct	no	no	no	no	no	no
ctcf.68	chr2R:16660707	chr2R_16660747_ctcf/68	C	T	0.669	0.627	0.000	no_overlap	overlaps_peak	no_TSS	Distal	correct	yes	yes	no	yes	no	yes	Foxl1	ATTTTACAT
ctcf.68	chr2R:16673109	chr2R_16673124_ctcf/68	G	A	0.735	0.700	0.000	overlaps_motif	overlaps_peak	no_TSS	Distal	correct	no	no	no	no	no	no
ctcf.68	chr2R:16800296	chr2R_16800220_ctcf/68	C	A	0.700	0.605	0.000	overlaps_motif	overlaps_peak	no_TSS	Distal	correct	no	no	no	no	no	no
ctcf.68	chr2R:18473328	chr2R_18473425_ctcf/68	C	G	0.380	0.739	0.000	no_overlap	overlaps_peak	no_TSS	Distal	incorrect	partially	no	no	no	no	no
ctcf.68	chr2R:18639349	chr2R_18639298_ctcf/68	G	T	0.871	0.953	0.000	overlaps_motif	overlaps_peak	TSS	Proximal	correct	no	no	no	no	no	no
ctcf.68	chr2R:19148137	chr2R_19148153_ctcf/68	C	T	0.758	0.742	0.000	overlaps_motif	overlaps_peak	no_TSS	Distal	correct	no	no	no	no	no	no
ctcf.68	chr2R:19362534	chr2R_19362487_ctcf/68	T	G	0.311	0.373	0.000	no_overlap	overlaps_peak	no_TSS	Distal	correct	yes	yes	no	yes	no	no	Sox1	GTAGAATGTATTTTCTACAT
ctcf.68	chr2R:21888821	chr2R_21888817_ctcf/68	T	G	0.283	0.383	0.000	overlaps_motif	overlaps_peak	no_TSS	Distal	correct	yes	yes	yes	no	yes	no
ctcf.68	chr2R:22060800	chr2R_22060776_ctcf/68	G	A	0.721	0.671	0.000	no_overlap	overlaps_peak	TSS	Proximal	correct	no	no	no	no	no	no
ctcf.68	chr2R:23606581	chr2R_23606586_ctcf/68	G	A	0.729	0.791	0.000	overlaps_motif	overlaps_peak	TSS	Proximal	correct	yes	yes	yes	yes	yes	no	Ets1	GTCCTTCCAG
ctcf.68	chr2R:23961018	chr2R_23960985_ctcf/68	C	T	0.274	0.392	0.000	no_overlap	overlaps_peak	no_TSS	Distal	correct	yes	yes	yes	no	no	no
ctcf.68	chr2R:25073604	chr2R_25073593_ctcf/68	G	A	0.771	0.654	0.000	overlaps_motif	overlaps_peak	no_TSS	Distal	correct	yes	yes	no	yes	no	no
ctcf.68	chr2R:5061963	chr2R_5061949_ctcf/68	G	T	0.807	1000	0.000	overlaps_motif	overlaps_peak	no_TSS	Distal	correct	yes	yes	yes	no	yes	no
ctcf.68	chr2R:5356207	chr2R_5356152_ctcf/68	C	A	0.788	0.936	0.000	overlaps_motif	overlaps_peak	no_TSS	Distal	correct	yes	yes	no	yes	no	no
ctcf.68	chr2R:6590436	chr2R_6590426_ctcf/68	G	A	0.809	0.684	0.000	overlaps_motif	overlaps_peak	no_TSS	Distal	correct	yes	yes	yes	no	yes	no
ctcf.68	chr2R:7104693	chr2R_7104686_ctcf/68	T	C	0.281	0.267	0.000	overlaps_motif	overlaps_peak	no_TSS	Distal	correct	yes	yes	yes	no	yes	no
ctcf.68	chr2R:8632195	chr2R_8632050_ctcf/68	T	C	0.285	0.296	0.000	overlaps_motif	overlaps_peak	TSS	Proximal	correct	yes	yes	yes	no	yes	no
ctcf.68	chr2R:9463555	chr2R_9463534_ctcf/68	C	T	0.743	0.835	0.000	overlaps_motif	overlaps_peak	no_TSS	Distal	correct	no	no	no	no	no	no
ctcf.68	chr3L:10254653	chr3L_10254657_ctcf/68	C	G	0.172	0.030	0.000	overlaps_motif	overlaps_peak	no_TSS	Distal	correct	yes	yes	yes	no	yes	no
ctcf.68	chr3L:10508166	chr3L_10508164_ctcf/68	T	G	0.169	0.031	0.000	overlaps_motif	overlaps_peak	no_TSS	Distal	correct	no	no	no	no	no	no
ctcf.68	chr3L:11123229	chr3L_11123169_ctcf/68	C	G	0.747	0.659	0.000	overlaps_motif	overlaps_peak	TSS	Proximal	correct	no	no	no	no	no	no
ctcf.68	chr3L:11234070	chr3L_11234083_ctcf/68	G	A	0.076	0.016	0.000	overlaps_motif	overlaps_peak	no_TSS	Distal	correct	yes	no	no	no	no	no
ctcf.68	chr3L:12187607	chr3L_12187602_ctcf/68	A	C	0.095	0.008	0.000	overlaps_motif	overlaps_peak	no_TSS	Distal	correct	yes	yes	yes	no	yes	no
ctcf.68	chr3L:12867222	chr3L_12867234_ctcf/68	C	G	0.670	0.270	0.000	no_overlap	overlaps_peak	no_TSS	Distal	incorrect	yes	yes	yes	no	no	no
ctcf.68	chr3L:1488661	chr3L_1488637_ctcf/68	T	G	0.073	0.071	0.000	no_overlap	overlaps_peak	TSS	Proximal	correct	yes	yes	yes	yes	yes	no	Msc	AAAAGCTTTT
ctcf.68	chr3L:16705826	chr3L_16705821_ctcf/68	C	T	0.738	0.616	0.000	overlaps_motif	overlaps_peak	no_TSS	Distal	correct	no	no	no	no	no	no
ctcf.68	chr3L:16930756	chr3L_16930678_ctcf/68	A	G	0.659	0.616	0.000	no_overlap	overlaps_peak	no_TSS	Distal	correct	yes	yes	no	yes	no	yes		TGGTTGTTGCACTGGCTA
ctcf.68	chr3L:17153666	chr3L_17153669_ctcf/68	C	T	1000	0.990	0.000	overlaps_motif	overlaps_peak	no_TSS	Distal	correct	yes	yes	yes	no	yes	no
ctcf.68	chr3L:1723807	chr3L_1723825_ctcf/68	C	T	0.278	0.355	0.000	no_overlap	overlaps_peak	no_TSS	Distal	correct	partially	no	no	no	no	no
ctcf.68	chr3L:17579407	chr3L_17579450_ctcf/68	G	C	0.659	0.635	0.000	overlaps_motif	overlaps_peak	no_TSS	Distal	correct	no	no	no	no	no	no
ctcf.68	chr3L:19328286	chr3L_19328295_ctcf/68	C	G	1000	0.930	0.000	overlaps_motif	overlaps_peak	no_TSS	Distal	correct	yes	yes	yes	no	yes	no
ctcf.68	chr3L:20498409	chr3L_20498406_ctcf/68	C	T	0.732	0.613	0.000	overlaps_motif	overlaps_peak	no_TSS	Distal	correct	no	no	no	no	no	no
ctcf.68	chr3L:22681320	chr3L_22681113_ctcf/68	T	G	0.330	0.367	0.000	no_overlap	overlaps_peak	no_TSS	Distal	correct	yes	yes	no	yes	no	yes	Foxl1	TTTACATTTA
ctcf.68	chr3L:22958460	chr3L_22958355_ctcf/68	A	G	0.701	0.617	0.000	no_overlap	overlaps_peak	no_TSS	Distal	correct	yes	yes	yes	yes	no	yes	Foxl2	ATGTAAA
ctcf.68	chr3L:3157868	chr3L_3157884_ctcf/68	A	G	0.748	0.710	0.000	overlaps_motif	overlaps_peak	no_TSS	Distal	correct	no	no	no	no	no	no
ctcf.68	chr3L:3927414	chr3L_3927404_ctcf/68	A	C	0.211	0.108	0.000	overlaps_motif	overlaps_peak	no_TSS	Distal	correct	partially	no	no	no	no	no
ctcf.68	chr3L:4532288	chr3L_4532293_ctcf/68	G	T	0.713	0.807	0.000	overlaps_motif	overlaps_peak	TSS	Proximal	correct	no	no	no	no	no	no
ctcf.68	chr3L:648122	chr3L_648365_ctcf/68	T	A	0.382	0.617	0.000	no_overlap	overlaps_peak	TSS	Proximal	incorrect	yes	yes	no	yes	no	yes	Nr1h2, Irx2	GTAAAATGTCAA, CTACATGTAAA
ctcf.68	chr3L:6995529	chr3L_6995547_ctcf/68	G	A	0.248	0.663	0.000	overlaps_motif	overlaps_peak	no_TSS	Distal	incorrect	no	no	no	no	no	no
ctcf.68	chr3L:9968424	chr3L_9968454_ctcf/68	C	T	0.640	0.827	0.000	no_overlap	overlaps_peak	TSS	Proximal	correct	yes	yes	no	yes	no	yes	Irx2	GGTTCATGTCATGGAT
ctcf.68	chr3R:10100726	chr3R_10100775_ctcf/68	C	G	0.271	0.396	0.000	no_overlap	overlaps_peak	TSS	Proximal	correct	yes	yes	yes	no	no	no
ctcf.68	chr3R:10630096	chr3R_10630123_ctcf/68	G	C	0.771	0.954	0.000	overlaps_motif	overlaps_peak	no_TSS	Distal	correct	partially	no	no	no	no	no
ctcf.68	chr3R:12723935	chr3R_12724050_ctcf/68	G	T	0.600	0.717	0.000	overlaps_motif	overlaps_peak	no_TSS	Distal	correct	no	no	no	no	no	no
ctcf.68	chr3R:14959506	chr3R_14959468_ctcf/68	T	G	0.257	0.201	0.000	overlaps_motif	overlaps_peak	no_TSS	Distal	correct	yes	yes	yes	no	yes	no
ctcf.68	chr3R:19648819	chr3R_19648807_ctcf/68	G	A	0.603	0.690	0.000	overlaps_motif	overlaps_peak	TSS	Proximal	correct	no	no	no	no	no	no
ctcf.68	chr3R:20416600	chr3R_20416606_ctcf/68	C	T	0.855	0.979	0.000	overlaps_motif	overlaps_peak	no_TSS	Distal	correct	yes	yes	yes	no	yes	no
ctcf.68	chr3R:21223611	chr3R_21223577_ctcf/68	G	C	0.948	0.991	0.000	overlaps_motif	overlaps_peak	TSS	Proximal	correct	no	no	no	no	no	no
ctcf.68	chr3R:23539031	chr3R_23538974_ctcf/68	T	G	0.658	0.683	0.000	no_overlap	overlaps_peak	TSS	Proximal	correct	yes	yes	no	yes	no	no
ctcf.68	chr3R:23541293	chr3R_23541304_ctcf/68	C	T	0.820	0.964	0.000	overlaps_motif	overlaps_peak	no_TSS	Distal	correct	yes	yes	yes	no	yes	no
ctcf.68	chr3R:24386634	chr3R_24386625_ctcf/68	G	A	0.791	0.999	0.000	overlaps_motif	overlaps_peak	no_TSS	Distal	correct	yes	yes	yes	no	yes	no
ctcf.68	chr3R:25112760	chr3R_25112747_ctcf/68	C	A	0.877	0.676	0.000	overlaps_motif	overlaps_peak	TSS	Proximal	correct	yes	yes	yes	no	yes	no
ctcf.68	chr3R:27117401	chr3R_27117401_ctcf/68	A	G	0.813	1000	0.000	overlaps_motif	overlaps_peak	no_TSS	Distal	correct	yes	yes	yes	no	yes	no
ctcf.68	chr3R:27547548	chr3R_27547455_ctcf/68	G	A	0.372	0.604	0.000	no_overlap	overlaps_peak	no_TSS	Distal	incorrect	no	no	no	no	no	no
ctcf.68	chr3R:28870562	chr3R_28870532_ctcf/68	C	A	0.331	0.658	0.000	overlaps_motif	overlaps_peak	no_TSS	Distal	incorrect	no	no	no	no	no	no
ctcf.68	chr3R:29553404	chr3R_29553378_ctcf/68	C	T	0.666	0.979	0.000	no_overlap	overlaps_peak	no_TSS	Distal	correct	yes	yes	yes	no	no	no
ctcf.68	chr3R:30294789	chr3R_30294769_ctcf/68	T	A	0.347	0.054	0.000	overlaps_motif	overlaps_peak	no_TSS	Distal	correct	yes	yes	yes	no	yes	no
ctcf.68	chr3R:30583785	chr3R_30583707_ctcf/68	C	A	0.638	0.618	0.000	no_overlap	overlaps_peak	TSS	Proximal	correct	yes	yes	no	yes	no	no
ctcf.68	chr3R:30950964	chr3R_30950955_ctcf/68	T	C	0.238	0.197	0.000	overlaps_motif	overlaps_peak	no_TSS	Distal	correct	yes	yes	yes	no	yes	no
ctcf.68	chr3R:6170935	chr3R_6170925_ctcf/68	C	A	0.692	0.722	0.000	overlaps_motif	overlaps_peak	no_TSS	Distal	correct	no	no	no	no	no	no
ctcf.68	chr3R:7644572	chr3R_7644643_ctcf/68	A	T	0.685	0.609	0.000	no_overlap	overlaps_peak	no_TSS	Distal	correct	yes	yes	no	yes	no	yes
ctcf.68	chr3R:9196035	chr3R_9196039_ctcf/68	C	A	0.946	1000	0.000	overlaps_motif	overlaps_peak	no_TSS	Distal	correct	yes	yes	yes	no	yes	no
ctcf.68	chr3R:9673386	chr3R_9673389_ctcf/68	G	A	0.978	0.992	0.000	overlaps_motif	overlaps_peak	TSS	Proximal	correct	yes	yes	yes	no	yes	no
mef2.68	chr2L:17227347	chr2L_17227275_mef2/68	G	A	0.248	0.360	0.000	no_overlap	overlaps_peak	no_TSS	Distal	correct	yes	yes	yes	yes	no	no		TAAGCTCC
mef2.68	chr2L:17754427	chr2L_17754514_mef2/68	C	T	0.364	0.359	0.004	no_overlap	overlaps_peak	no_TSS	Distal	correct	yes	no	no	no	no	no
mef2.68	chr2L:487438	chr2L_487427_mef2/68	C	A	0.355	0.304	0.000	no_overlap	overlaps_peak	no_TSS	Distal	correct	yes	no	no	no	no	no
mef2.68	chr2L:5783401	chr2L_5783304_mef2/68	T	G	0.383	0.376	0.000	no_overlap	overlaps_peak	no_TSS	Distal	correct	yes	yes	yes	yes	yes	no	Znf416	TGACCAG
mef2.68	chr2R:14224310	chr2R_14224353_mef2/68	A	G	0.628	0.687	0.002	overlaps_motif	overlaps_peak	no_TSS	Distal	correct	yes	yes	yes	no	yes	no
mef2.68	chr3L:13997200	chr3L_13997218_mef2/68	G	C	0.229	0.398	0.000	no_overlap	overlaps_peak	TSS	Proximal	correct	yes	yes	yes	yes	no	no		TGTTGCATCCCTGG
mef2.68	chr3L:8765577	chr3L_8765578_mef2/68	T	A	0.667	0.635	0.000	overlaps_motif	overlaps_peak	no_TSS	Distal	correct	yes	yes	yes	no	yes	no
mef2.68	chr3R:17052697	chr3R_17052759_mef2/68	A	G	0.677	0.619	0.001	no_overlap	overlaps_peak	no_TSS	Distal	correct	yes	yes	yes	no	yes	no
mef2.68	chr3R:30060070	chr3R_30060077_mef2/68	T	A	0.667	0.705	0.000	overlaps_motif	overlaps_peak	no_TSS	Distal	correct	yes	yes	yes	no	yes	no
mef2.68	chr3R:30735251	chr3R_30735205_mef2/68	G	C	0.631	0.618	0.000	no_overlap	overlaps_peak	no_TSS	Distal	correct	yes	yes	yes	no	no	no
mef2.68	chr3R:8689135	chr3R_8689041_mef2/68	G	A	0.393	0.377	0.000	overlaps_motif	overlaps_peak	no_TSS	Distal	correct	yes	yes	yes	no	yes	no
mef2.1012	chr2L:12830007	chr2L_12829989_mef2/1012	T	A	0.256	0.203	0.000	no_overlap	overlaps_peak	no_TSS	Distal	correct	yes	yes	yes	yes	no	yes
mef2.1012	chr2L:14898797	chr2L_14898805_mef2/1012	C	T	0.240	0.367	0.000	overlaps_motif	overlaps_peak	no_TSS	Distal	correct	yes	no	no	no	no	no
mef2.1012	chr2L:16818374	chr2L_16818336_mef2/1012	A	T	0.638	0.638	0.007	no_overlap	overlaps_peak	no_TSS	Distal	correct	yes	yes	yes	yes	no	yes
mef2.1012	chr2L:16864435	chr2L_16864558_mef2/1012	G	A	0.384	0.298	0.000	no_overlap	overlaps_peak	no_TSS	Distal	correct	partially	no	no	no	no	no
mef2.1012	chr2L:20098293	chr2L_20098308_mef2/1012	C	G	0.366	0.387	0.001	no_overlap	overlaps_peak	TSS	Proximal	correct	yes	yes	yes	no	no	no
mef2.1012	chr2L:21917858	chr2L_21917874_mef2/1012	C	T	0.679	0.601	0.000	no_overlap	overlaps_peak	no_TSS	Distal	correct	yes	yes	yes	no	no	no
mef2.1012	chr2L:5783401	chr2L_5783306_mef2/1012	T	G	0.296	0.357	0.000	no_overlap	overlaps_peak	no_TSS	Distal	correct	yes	yes	yes	no	yes	no
mef2.1012	chr2L:9681117	chr2L_9681178_mef2/1012	A	G	0.713	0.899	0.000	overlaps_motif	overlaps_peak	no_TSS	Distal	correct	yes	yes	yes	no	yes	no
mef2.1012	chr2R:14077926	chr2R_14077939_mef2/1012	C	A	0.357	0.391	0.000	no_overlap	overlaps_peak	no_TSS	Distal	correct	yes	yes	no	yes	no	no	Zic1:Zic2	TTCCAGCAGGGG
mef2.1012	chr2R:14224310	chr2R_14224343_mef2/1012	A	G	0.772	0.700	0.000	overlaps_motif	overlaps_peak	no_TSS	Distal	correct	yes	yes	yes	no	yes	no
mef2.1012	chr2R:14316089	chr2R_14316105_mef2/1012	G	A	0.728	0.612	0.000	overlaps_motif	overlaps_peak	no_TSS	Distal	correct	yes	yes	yes	no	yes	no
mef2.1012	chr2R:15246924	chr2R_15246970_mef2/1012	T	G	0.720	0.386	0.000	no_overlap	overlaps_peak	no_TSS	Distal	incorrect	yes	yes	yes	no	no	no
mef2.1012	chr2R:20165760	chr2R_20165720_mef2/1012	A	T	0.643	0.623	0.001	no_overlap	overlaps_peak	no_TSS	Distal	correct	yes	no	no	yes	no	yes	Foxk1	TGTAAACAAAA
mef2.1012	chr2R:22248328	chr2R_22248321_mef2/1012	C	G	0.771	0.727	0.000	no_overlap	overlaps_peak	no_TSS	Distal	correct	yes	yes	yes	no	no	no
mef2.1012	chr2R:22305159	chr2R_22305156_mef2/1012	C	T	0.330	0.393	0.000	no_overlap	overlaps_peak	no_TSS	Distal	correct	yes	yes	yes	no	no	no
mef2.1012	chr2R:24694143	chr2R_24694124_mef2/1012	T	A	0.687	0.608	0.000	no_overlap	overlaps_peak	TSS	Proximal	correct	yes	yes	yes	no	yes	no
mef2.1012	chr2R:7513371	chr2R_7513355_mef2/1012	G	T	0.723	0.625	0.000	overlaps_motif	overlaps_peak	no_TSS	Distal	correct	yes	yes	yes	no	yes	no
mef2.1012	chr2R:8121599	chr2R_8121533_mef2/1012	T	A	0.684	0.678	0.000	overlaps_motif	overlaps_peak	no_TSS	Distal	correct	yes	yes	yes	no	yes	no
mef2.1012	chr2R:8283957	chr2R_8283938_mef2/1012	C	T	0.354	0.275	0.000	no_overlap	overlaps_peak	no_TSS	Distal	correct	yes	yes	yes	no	yes	no
mef2.1012	chr2R:9407012	chr2R_9407075_mef2/1012	G	C	0.399	0.394	0.000	no_overlap	overlaps_peak	no_TSS	Distal	correct	yes	yes	yes	no	no	no
mef2.1012	chr3L:10375846	chr3L_10375797_mef2/1012	A	C	0.335	0.392	0.000	no_overlap	overlaps_peak	no_TSS	Distal	correct	yes	yes	yes	no	no	no
mef2.1012	chr3L:11370840	chr3L_11370743_mef2/1012	T	A	0.694	0.635	0.000	overlaps_motif	overlaps_peak	no_TSS	Distal	correct	yes	yes	yes	no	yes	no
mef2.1012	chr3L:15086805	chr3L_15086772_mef2/1012	T	C	0.682	0.601	0.001	overlaps_motif	overlaps_peak	no_TSS	Distal	correct	yes	yes	yes	no	yes	no
mef2.1012	chr3L:155777	chr3L_155739_mef2/1012	G	T	0.802	0.601	0.000	overlaps_motif	overlaps_peak	no_TSS	Distal	correct	yes	yes	yes	no	yes	no
mef2.1012	chr3L:22058946	chr3L_22058931_mef2/1012	T	G	0.654	0.606	0.000	overlaps_motif	overlaps_peak	no_TSS	Distal	correct	yes	yes	yes	no	yes	no
mef2.1012	chr3L:22821573	chr3L_22821510_mef2/1012	G	T	0.333	0.175	0.000	no_overlap	overlaps_peak	no_TSS	Distal	correct	yes	yes	yes	no	no	no
mef2.1012	chr3L:2744927	chr3L_2744918_mef2/1012	A	G	0.749	0.707	0.000	overlaps_motif	overlaps_peak	no_TSS	Distal	correct	yes	yes	yes	no	yes	no
mef2.1012	chr3L:4896239	chr3L_4896205_mef2/1012	A	T	0.625	0.687	0.004	overlaps_motif	overlaps_peak	no_TSS	Distal	correct	yes	yes	yes	no	yes	no
mef2.1012	chr3L:9349417	chr3L_9349509_mef2/1012	G	A	0.626	0.354	0.000	no_overlap	overlaps_peak	TSS	Proximal	incorrect	yes	yes	yes	yes	no	yes
mef2.1012	chr3R:16872551	chr3R_16872536_mef2/1012	G	A	0.636	0.647	0.003	no_overlap	overlaps_peak	no_TSS	Distal	correct	yes	yes	yes	no	no	no
mef2.1012	chr3R:19642452	chr3R_19642232_mef2/1012	G	T	0.381	0.346	0.000	no_overlap	overlaps_peak	TSS	Proximal	correct	yes	yes	yes	no	no	no
mef2.1012	chr3R:20913036	chr3R_20912858_mef2/1012	G	T	0.370	0.620	0.002	no_overlap	overlaps_peak	TSS	Proximal	incorrect	partially	no	no	no	no	no
mef2.1012	chr3R:30735251	chr3R_30735182_mef2/1012	G	C	0.612	0.647	0.000	no_overlap	overlaps_peak	no_TSS	Distal	correct	yes	yes	yes	no	no	no
mef2.1012	chr3R:6903593	chr3R_6903632_mef2/1012	T	C	0.660	0.751	0.002	no_overlap	overlaps_peak	no_TSS	Distal	correct	yes	yes	no	yes	no	yes		TCAAAACATTTGACAGCTGA
mef2.1012	chr3R:8590189	chr3R_8590266_mef2/1012	G	A	0.372	0.365	0.001	no_overlap	overlaps_peak	no_TSS	Distal	correct	yes	yes	yes	no	no	no
mef2.1012	chr3R:8689135	chr3R_8689015_mef2/1012	G	A	0.367	0.381	0.000	overlaps_motif	overlaps_peak	no_TSS	Distal	correct	yes	yes	no	no	yes	no

## Sheet: README
Supplemental Table S6: Saturation mutagenesis motif discovery
Motifs recovered by saturation mutagenesis on 175 strong predicted Allelic Imbalanced variants.
