# Supplementary material for: Integrating genetic variation with deep learning provides context for variants impacting transcription factor binding during embryogenesis
Source: HighWire-hosted journal article supplement (doi:10.1101/gr.279652.124), 2025-04-15
Supplement: Supplemental_Code.zip [file metatable.xlsx]

## Sheet: metatable
Dataset	Experiment_ID	TF	Fbgn	biotype	biotype_clean	tissue	time_point	biotype_clean.tissue.time_point	treatment	SRR	input
ENCSR004RJS.CG9876.adult_whole-fly_site-specific-recombination_insertion:FBgn0034821	ENCSR004RJS	CG9876	FBgn0034821	adult	adult	whole-fly	NA	adult.whole-fly	whole-fly,site-specific-recombination,insertion	remap2022_ENCSR004RJS.CG9876.adult_whole-fly_site-specific-recombination_insertion:FBgn0034821_ENCFF102DSV,remap2022_ENCSR004RJS.CG9876.adult_whole-fly_site-specific-recombination_insertion:FBgn0034821_ENCFF122EYP
ENCSR004VNY.cad.adult_whole-fly_insertion:FBgn0000251	ENCSR004VNY	cad	FBgn0000251	adult	adult	whole-fly	NA	adult.whole-fly	whole-fly,insertion	remap2022_ENCSR004VNY.cad.adult_whole-fly_insertion:FBgn0000251_ENCFF452OXT,remap2022_ENCSR004VNY.cad.adult_whole-fly_insertion:FBgn0000251_ENCFF663QQZ
ENCSR005MLL.Pdp1.adult_whole-fly_site-specific-recombination_insertion:FBgn0016694	ENCSR005MLL	Pdp1	FBgn0016694	adult	adult	whole-fly	NA	adult.whole-fly	whole-fly,site-specific-recombination,insertion	remap2022_ENCSR005MLL.Pdp1.adult_whole-fly_site-specific-recombination_insertion:FBgn0016694_ENCFF150PED,remap2022_ENCSR005MLL.Pdp1.adult_whole-fly_site-specific-recombination_insertion:FBgn0016694_ENCFF083DMO,remap2022_ENCSR005MLL.Pdp1.adult_whole-fly_site-specific-recombination_insertion:FBgn0016694_ENCFF734XFO
ENCSR007HUT.cyc.adult_whole-fly_site-specific-recombination_insertion:FBgn0023094	ENCSR007HUT	cyc	FBgn0023094	adult	adult	whole-fly	NA	adult.whole-fly	whole-fly,site-specific-recombination,insertion	remap2022_ENCSR007HUT.cyc.adult_whole-fly_site-specific-recombination_insertion:FBgn0023094_ENCFF842ZFQ,remap2022_ENCSR007HUT.cyc.adult_whole-fly_site-specific-recombination_insertion:FBgn0023094_ENCFF984BCL,remap2022_ENCSR007HUT.cyc.adult_whole-fly_site-specific-recombination_insertion:FBgn0023094_ENCFF943PCE
ENCSR008NYP.sug.adult_whole-fly_site-specific-recombination_insertion:FBgn0033782	ENCSR008NYP	sug	FBgn0033782	adult	adult	whole-fly	NA	adult.whole-fly	whole-fly,site-specific-recombination,insertion	remap2022_ENCSR008NYP.sug.adult_whole-fly_site-specific-recombination_insertion:FBgn0033782_ENCFF139XDM,remap2022_ENCSR008NYP.sug.adult_whole-fly_site-specific-recombination_insertion:FBgn0033782_ENCFF431YIK
ENCSR012MXT.Nf-YC.adult_whole-fly_site-specific-recombination_insertion:FBgn0029905	ENCSR012MXT	Nf-YC	FBgn0029905	adult	adult	whole-fly	NA	adult.whole-fly	whole-fly,site-specific-recombination,insertion	remap2022_ENCSR012MXT.Nf-YC.adult_whole-fly_site-specific-recombination_insertion:FBgn0029905_ENCFF901PCU,remap2022_ENCSR012MXT.Nf-YC.adult_whole-fly_site-specific-recombination_insertion:FBgn0029905_ENCFF722CVZ,remap2022_ENCSR012MXT.Nf-YC.adult_whole-fly_site-specific-recombination_insertion:FBgn0029905_ENCFF882RRS
ENCSR014ETB.lola.adult_whole-fly_insertion:FBgn0283521	ENCSR014ETB	lola	FBgn0283521	adult	adult	whole-fly	NA	adult.whole-fly	whole-fly,insertion	remap2022_ENCSR014ETB.lola.adult_whole-fly_insertion:FBgn0283521_ENCFF417PPL,remap2022_ENCSR014ETB.lola.adult_whole-fly_insertion:FBgn0283521_ENCFF947DEU,remap2022_ENCSR014ETB.lola.adult_whole-fly_insertion:FBgn0283521_ENCFF769CCQ
ENCSR015ZUX.E-spl-m-beta-HLH.adult_whole-fly_site-specific-recombination_insertion:FBgn0002733	ENCSR015ZUX	E-spl-m-beta-HLH	FBgn0002733	adult	adult	whole-fly	NA	adult.whole-fly	whole-fly,site-specific-recombination,insertion	remap2022_ENCSR015ZUX.E-spl-m-beta-HLH.adult_whole-fly_site-specific-recombination_insertion:FBgn0002733_ENCFF402LDU,remap2022_ENCSR015ZUX.E-spl-m-beta-HLH.adult_whole-fly_site-specific-recombination_insertion:FBgn0002733_ENCFF279VPR
ENCSR017FMO.phol.adult_whole-fly_site-specific-recombination_insertion:FBgn0035997	ENCSR017FMO	phol	FBgn0035997	adult	adult	whole-fly	NA	adult.whole-fly	whole-fly,site-specific-recombination,insertion	remap2022_ENCSR017FMO.phol.adult_whole-fly_site-specific-recombination_insertion:FBgn0035997_ENCFF403MPK,remap2022_ENCSR017FMO.phol.adult_whole-fly_site-specific-recombination_insertion:FBgn0035997_ENCFF378CSZ,remap2022_ENCSR017FMO.phol.adult_whole-fly_site-specific-recombination_insertion:FBgn0035997_ENCFF335DFM
ENCSR018VBD.CG34367.adult_whole-fly_site-specific-recombination_insertion:FBgn0085396	ENCSR018VBD	CG34367	FBgn0085396	adult	adult	whole-fly	NA	adult.whole-fly	whole-fly,site-specific-recombination,insertion	remap2022_ENCSR018VBD.CG34367.adult_whole-fly_site-specific-recombination_insertion:FBgn0085396_ENCFF336POT,remap2022_ENCSR018VBD.CG34367.adult_whole-fly_site-specific-recombination_insertion:FBgn0085396_ENCFF187AKI
ENCSR020BAG.Dfd.adult_whole-fly_site-specific-recombination_insertion:FBgn0000439	ENCSR020BAG	Dfd	FBgn0000439	adult	adult	whole-fly	NA	adult.whole-fly	whole-fly,site-specific-recombination,insertion	remap2022_ENCSR020BAG.Dfd.adult_whole-fly_site-specific-recombination_insertion:FBgn0000439_ENCFF983FXW,remap2022_ENCSR020BAG.Dfd.adult_whole-fly_site-specific-recombination_insertion:FBgn0000439_ENCFF128TEX
ENCSR021FJA.NK7-1.adult_whole-fly_site-specific-recombination_insertion:FBgn0024321	ENCSR021FJA	NK7-1	FBgn0024321	adult	adult	whole-fly	NA	adult.whole-fly	whole-fly,site-specific-recombination,insertion	remap2022_ENCSR021FJA.NK7-1.adult_whole-fly_site-specific-recombination_insertion:FBgn0024321_ENCFF879QNV,remap2022_ENCSR021FJA.NK7-1.adult_whole-fly_site-specific-recombination_insertion:FBgn0024321_ENCFF267VST,remap2022_ENCSR021FJA.NK7-1.adult_whole-fly_site-specific-recombination_insertion:FBgn0024321_ENCFF919MZS
ENCSR021VXG.CG10209.adult_whole-fly_site-specific-recombination_insertion:FBgn0033971	ENCSR021VXG	CG10209	FBgn0033971	adult	adult	whole-fly	NA	adult.whole-fly	whole-fly,site-specific-recombination,insertion	remap2022_ENCSR021VXG.CG10209.adult_whole-fly_site-specific-recombination_insertion:FBgn0033971_ENCFF534UDN,remap2022_ENCSR021VXG.CG10209.adult_whole-fly_site-specific-recombination_insertion:FBgn0033971_ENCFF349PFX,remap2022_ENCSR021VXG.CG10209.adult_whole-fly_site-specific-recombination_insertion:FBgn0033971_ENCFF073SKE
ENCSR025MAQ.ATbp.adult_whole-fly_site-specific-recombination_insertion:FBgn0039946	ENCSR025MAQ	ATbp	FBgn0039946	adult	adult	whole-fly	NA	adult.whole-fly	whole-fly,site-specific-recombination,insertion	remap2022_ENCSR025MAQ.ATbp.adult_whole-fly_site-specific-recombination_insertion:FBgn0039946_ENCFF287YCH,remap2022_ENCSR025MAQ.ATbp.adult_whole-fly_site-specific-recombination_insertion:FBgn0039946_ENCFF761TOM
ENCSR027AMS.CG12659.adult_whole-fly_site-specific-recombination_insertion:FBgn0040929	ENCSR027AMS	CG12659	FBgn0040929	adult	adult	whole-fly	NA	adult.whole-fly	whole-fly,site-specific-recombination,insertion	remap2022_ENCSR027AMS.CG12659.adult_whole-fly_site-specific-recombination_insertion:FBgn0040929_ENCFF736ISE,remap2022_ENCSR027AMS.CG12659.adult_whole-fly_site-specific-recombination_insertion:FBgn0040929_ENCFF631OLF,remap2022_ENCSR027AMS.CG12659.adult_whole-fly_site-specific-recombination_insertion:FBgn0040929_ENCFF706SSG
ENCSR028DHQ.CG12299.adult_whole-fly_site-specific-recombination_insertion:FBgn0032295	ENCSR028DHQ	CG12299	FBgn0032295	adult	adult	whole-fly	NA	adult.whole-fly	whole-fly,site-specific-recombination,insertion	remap2022_ENCSR028DHQ.CG12299.adult_whole-fly_site-specific-recombination_insertion:FBgn0032295_ENCFF420PKV,remap2022_ENCSR028DHQ.CG12299.adult_whole-fly_site-specific-recombination_insertion:FBgn0032295_ENCFF508ZUQ
ENCSR032CDC.chif.adult_whole-fly_site-specific-recombination_insertion:FBgn0000307	ENCSR032CDC	chif	FBgn0000307	adult	adult	whole-fly	NA	adult.whole-fly	whole-fly,site-specific-recombination,insertion	remap2022_ENCSR032CDC.chif.adult_whole-fly_site-specific-recombination_insertion:FBgn0000307_ENCFF011ITC,remap2022_ENCSR032CDC.chif.adult_whole-fly_site-specific-recombination_insertion:FBgn0000307_ENCFF570BTI,remap2022_ENCSR032CDC.chif.adult_whole-fly_site-specific-recombination_insertion:FBgn0000307_ENCFF357VYU
ENCSR032DLA.Usf.adult_whole-fly_site-specific-recombination_insertion:FBgn0029711	ENCSR032DLA	Usf	FBgn0029711	adult	adult	whole-fly	NA	adult.whole-fly	whole-fly,site-specific-recombination,insertion	remap2022_ENCSR032DLA.Usf.adult_whole-fly_site-specific-recombination_insertion:FBgn0029711_ENCFF106IOI,remap2022_ENCSR032DLA.Usf.adult_whole-fly_site-specific-recombination_insertion:FBgn0029711_ENCFF652WRY
ENCSR032HMJ.E-z.adult_whole-fly_site-specific-recombination_insertion:FBgn0000629	ENCSR032HMJ	E-z	FBgn0000629	adult	adult	whole-fly	NA	adult.whole-fly	whole-fly,site-specific-recombination,insertion	remap2022_ENCSR032HMJ.E-z.adult_whole-fly_site-specific-recombination_insertion:FBgn0000629_ENCFF588SBM,remap2022_ENCSR032HMJ.E-z.adult_whole-fly_site-specific-recombination_insertion:FBgn0000629_ENCFF927ZKX,remap2022_ENCSR032HMJ.E-z.adult_whole-fly_site-specific-recombination_insertion:FBgn0000629_ENCFF603OAJ
ENCSR033IIP.pan.adult_whole-fly:FBgn0085432	ENCSR033IIP	pan	FBgn0085432	adult	adult	whole-fly	NA	adult.whole-fly	whole-fly	remap2022_ENCSR033IIP.pan.adult_whole-fly:FBgn0085432_ENCFF882HVE,remap2022_ENCSR033IIP.pan.adult_whole-fly:FBgn0085432_ENCFF218EIV
ENCSR033ZHC.CG7101.adult_whole-fly_site-specific-recombination_insertion:FBgn0030963	ENCSR033ZHC	CG7101	FBgn0030963	adult	adult	whole-fly	NA	adult.whole-fly	whole-fly,site-specific-recombination,insertion	remap2022_ENCSR033ZHC.CG7101.adult_whole-fly_site-specific-recombination_insertion:FBgn0030963_ENCFF565NPF,remap2022_ENCSR033ZHC.CG7101.adult_whole-fly_site-specific-recombination_insertion:FBgn0030963_ENCFF891AWW
ENCSR035GCI.nau.adult_whole-fly_site-specific-recombination_insertion:FBgn0002922	ENCSR035GCI	nau	FBgn0002922	adult	adult	whole-fly	NA	adult.whole-fly	whole-fly,site-specific-recombination,insertion	remap2022_ENCSR035GCI.nau.adult_whole-fly_site-specific-recombination_insertion:FBgn0002922_ENCFF957MKV,remap2022_ENCSR035GCI.nau.adult_whole-fly_site-specific-recombination_insertion:FBgn0002922_ENCFF772UAH,remap2022_ENCSR035GCI.nau.adult_whole-fly_site-specific-recombination_insertion:FBgn0002922_ENCFF610VJS
ENCSR038HZR.CoRest.adult_whole-fly_site-specific-recombination_insertion:FBgn0261573	ENCSR038HZR	CoRest	FBgn0261573	adult	adult	whole-fly	NA	adult.whole-fly	whole-fly,site-specific-recombination,insertion	remap2022_ENCSR038HZR.CoRest.adult_whole-fly_site-specific-recombination_insertion:FBgn0261573_ENCFF118URL,remap2022_ENCSR038HZR.CoRest.adult_whole-fly_site-specific-recombination_insertion:FBgn0261573_ENCFF688SGR,remap2022_ENCSR038HZR.CoRest.adult_whole-fly_site-specific-recombination_insertion:FBgn0261573_ENCFF263QWT
ENCSR042FCJ.CG7556.adult_whole-fly_site-specific-recombination_insertion:FBgn0030990	ENCSR042FCJ	CG7556	FBgn0030990	adult	adult	whole-fly	NA	adult.whole-fly	whole-fly,site-specific-recombination,insertion	remap2022_ENCSR042FCJ.CG7556.adult_whole-fly_site-specific-recombination_insertion:FBgn0030990_ENCFF216GAV,remap2022_ENCSR042FCJ.CG7556.adult_whole-fly_site-specific-recombination_insertion:FBgn0030990_ENCFF885ISS
ENCSR042XCV.salr.adult_whole-fly_site-specific-recombination_insertion:FBgn0000287	ENCSR042XCV	salr	FBgn0000287	adult	adult	whole-fly	NA	adult.whole-fly	whole-fly,site-specific-recombination,insertion	remap2022_ENCSR042XCV.salr.adult_whole-fly_site-specific-recombination_insertion:FBgn0000287_ENCFF039UBC,remap2022_ENCSR042XCV.salr.adult_whole-fly_site-specific-recombination_insertion:FBgn0000287_ENCFF659JNP,remap2022_ENCSR042XCV.salr.adult_whole-fly_site-specific-recombination_insertion:FBgn0000287_ENCFF548ZZG
ENCSR044IDQ.CG12236.adult_whole-fly_site-specific-recombination_insertion:FBgn0029822	ENCSR044IDQ	CG12236	FBgn0029822	adult	adult	whole-fly	NA	adult.whole-fly	whole-fly,site-specific-recombination,insertion	remap2022_ENCSR044IDQ.CG12236.adult_whole-fly_site-specific-recombination_insertion:FBgn0029822_ENCFF534BBK,remap2022_ENCSR044IDQ.CG12236.adult_whole-fly_site-specific-recombination_insertion:FBgn0029822_ENCFF756WLV
ENCSR054BLW.az2.adult_whole-fly_site-specific-recombination_insertion:FBgn0025185	ENCSR054BLW	az2	FBgn0025185	adult	adult	whole-fly	NA	adult.whole-fly	whole-fly,site-specific-recombination,insertion	remap2022_ENCSR054BLW.az2.adult_whole-fly_site-specific-recombination_insertion:FBgn0025185_ENCFF144JUF,remap2022_ENCSR054BLW.az2.adult_whole-fly_site-specific-recombination_insertion:FBgn0025185_ENCFF006IBH,remap2022_ENCSR054BLW.az2.adult_whole-fly_site-specific-recombination_insertion:FBgn0025185_ENCFF732ZXK
ENCSR055BAQ.Coop.adult_whole-fly_site-specific-recombination_insertion:FBgn0263240	ENCSR055BAQ	Coop	FBgn0263240	adult	adult	whole-fly	NA	adult.whole-fly	whole-fly,site-specific-recombination,insertion	remap2022_ENCSR055BAQ.Coop.adult_whole-fly_site-specific-recombination_insertion:FBgn0263240_ENCFF361ODU,remap2022_ENCSR055BAQ.Coop.adult_whole-fly_site-specific-recombination_insertion:FBgn0263240_ENCFF112XQE,remap2022_ENCSR055BAQ.Coop.adult_whole-fly_site-specific-recombination_insertion:FBgn0263240_ENCFF659WTO
ENCSR058DSI.pan.adult_whole-fly_site-specific-recombination_insertion:FBgn0085432	ENCSR058DSI	pan	FBgn0085432	adult	adult	whole-fly	NA	adult.whole-fly	whole-fly,site-specific-recombination,insertion	remap2022_ENCSR058DSI.pan.adult_whole-fly_site-specific-recombination_insertion:FBgn0085432_ENCFF068IFW,remap2022_ENCSR058DSI.pan.adult_whole-fly_site-specific-recombination_insertion:FBgn0085432_ENCFF957PCC
ENCSR059LML.CG32006.adult_whole-fly_site-specific-recombination_insertion:FBgn0052006	ENCSR059LML	CG32006	FBgn0052006	adult	adult	whole-fly	NA	adult.whole-fly	whole-fly,site-specific-recombination,insertion	remap2022_ENCSR059LML.CG32006.adult_whole-fly_site-specific-recombination_insertion:FBgn0052006_ENCFF040BHL,remap2022_ENCSR059LML.CG32006.adult_whole-fly_site-specific-recombination_insertion:FBgn0052006_ENCFF464AHM,remap2022_ENCSR059LML.CG32006.adult_whole-fly_site-specific-recombination_insertion:FBgn0052006_ENCFF911TZP
ENCSR059TJM.CG3995.adult_whole-fly_site-specific-recombination_insertion:FBgn0038472	ENCSR059TJM	CG3995	FBgn0038472	adult	adult	whole-fly	NA	adult.whole-fly	whole-fly,site-specific-recombination,insertion	remap2022_ENCSR059TJM.CG3995.adult_whole-fly_site-specific-recombination_insertion:FBgn0038472_ENCFF988BXX,remap2022_ENCSR059TJM.CG3995.adult_whole-fly_site-specific-recombination_insertion:FBgn0038472_ENCFF541TTO,remap2022_ENCSR059TJM.CG3995.adult_whole-fly_site-specific-recombination_insertion:FBgn0038472_ENCFF304CPF
ENCSR059YLP.CG4318.adult_whole-fly_site-specific-recombination_insertion:FBgn0030455	ENCSR059YLP	CG4318	FBgn0030455	adult	adult	whole-fly	NA	adult.whole-fly	whole-fly,site-specific-recombination,insertion	remap2022_ENCSR059YLP.CG4318.adult_whole-fly_site-specific-recombination_insertion:FBgn0030455_ENCFF403HSU,remap2022_ENCSR059YLP.CG4318.adult_whole-fly_site-specific-recombination_insertion:FBgn0030455_ENCFF593NFG,remap2022_ENCSR059YLP.CG4318.adult_whole-fly_site-specific-recombination_insertion:FBgn0030455_ENCFF593HUL
ENCSR060CFV.CG7745.adult_whole-fly_site-specific-recombination_insertion:FBgn0033616	ENCSR060CFV	CG7745	FBgn0033616	adult	adult	whole-fly	NA	adult.whole-fly	whole-fly,site-specific-recombination,insertion	remap2022_ENCSR060CFV.CG7745.adult_whole-fly_site-specific-recombination_insertion:FBgn0033616_ENCFF448VTX,remap2022_ENCSR060CFV.CG7745.adult_whole-fly_site-specific-recombination_insertion:FBgn0033616_ENCFF740DIL
ENCSR064GFC.tin.adult_whole-fly_site-specific-recombination_insertion:FBgn0004110	ENCSR064GFC	tin	FBgn0004110	adult	adult	whole-fly	NA	adult.whole-fly	whole-fly,site-specific-recombination,insertion	remap2022_ENCSR064GFC.tin.adult_whole-fly_site-specific-recombination_insertion:FBgn0004110_ENCFF281IQM,remap2022_ENCSR064GFC.tin.adult_whole-fly_site-specific-recombination_insertion:FBgn0004110_ENCFF113ZWD,remap2022_ENCSR064GFC.tin.adult_whole-fly_site-specific-recombination_insertion:FBgn0004110_ENCFF780JUW,remap2022_ENCSR064GFC.tin.adult_whole-fly_site-specific-recombination_insertion:FBgn000…
ENCSR066ITF.stwl.adult_whole-fly_site-specific-recombination_insertion:FBgn0003459	ENCSR066ITF	stwl	FBgn0003459	adult	adult	whole-fly	NA	adult.whole-fly	whole-fly,site-specific-recombination,insertion	remap2022_ENCSR066ITF.stwl.adult_whole-fly_site-specific-recombination_insertion:FBgn0003459_ENCFF225VLS,remap2022_ENCSR066ITF.stwl.adult_whole-fly_site-specific-recombination_insertion:FBgn0003459_ENCFF785TWV,remap2022_ENCSR066ITF.stwl.adult_whole-fly_site-specific-recombination_insertion:FBgn0003459_ENCFF958LYD
ENCSR069AWH.side.adult_whole-fly_site-specific-recombination_insertion:FBgn0016061	ENCSR069AWH	side	FBgn0016061	adult	adult	whole-fly	NA	adult.whole-fly	whole-fly,site-specific-recombination,insertion	remap2022_ENCSR069AWH.side.adult_whole-fly_site-specific-recombination_insertion:FBgn0016061_ENCFF667YMQ,remap2022_ENCSR069AWH.side.adult_whole-fly_site-specific-recombination_insertion:FBgn0016061_ENCFF712RZY
ENCSR073PHL.cic.adult_whole-fly_site-specific-recombination_insertion:FBgn0262582	ENCSR073PHL	cic	FBgn0262582	adult	adult	whole-fly	NA	adult.whole-fly	whole-fly,site-specific-recombination,insertion	remap2022_ENCSR073PHL.cic.adult_whole-fly_site-specific-recombination_insertion:FBgn0262582_ENCFF163KWQ,remap2022_ENCSR073PHL.cic.adult_whole-fly_site-specific-recombination_insertion:FBgn0262582_ENCFF337IZP
ENCSR074LKQ.pan.adult_whole-fly:FBgn0085432	ENCSR074LKQ	pan	FBgn0085432	adult	adult	whole-fly	NA	adult.whole-fly	whole-fly	remap2022_ENCSR074LKQ.pan.adult_whole-fly:FBgn0085432_ENCFF437YLI,remap2022_ENCSR074LKQ.pan.adult_whole-fly:FBgn0085432_ENCFF123QCE
ENCSR074YRV.lola.adult_whole-fly_insertion:FBgn0283521	ENCSR074YRV	lola	FBgn0283521	adult	adult	whole-fly	NA	adult.whole-fly	whole-fly,insertion	remap2022_ENCSR074YRV.lola.adult_whole-fly_insertion:FBgn0283521_ENCFF687CDK,remap2022_ENCSR074YRV.lola.adult_whole-fly_insertion:FBgn0283521_ENCFF373IOU
ENCSR078TMF.ovo.adult_whole-fly_site-specific-recombination_insertion:FBgn0003028	ENCSR078TMF	ovo	FBgn0003028	adult	adult	whole-fly	NA	adult.whole-fly	whole-fly,site-specific-recombination,insertion	remap2022_ENCSR078TMF.ovo.adult_whole-fly_site-specific-recombination_insertion:FBgn0003028_ENCFF339FMR,remap2022_ENCSR078TMF.ovo.adult_whole-fly_site-specific-recombination_insertion:FBgn0003028_ENCFF492TMU
ENCSR082FZF.CG2875.adult_whole-fly_site-specific-recombination_insertion:FBgn0029672	ENCSR082FZF	CG2875	FBgn0029672	adult	adult	whole-fly	NA	adult.whole-fly	whole-fly,site-specific-recombination,insertion	remap2022_ENCSR082FZF.CG2875.adult_whole-fly_site-specific-recombination_insertion:FBgn0029672_ENCFF187SAM,remap2022_ENCSR082FZF.CG2875.adult_whole-fly_site-specific-recombination_insertion:FBgn0029672_ENCFF482RCL
ENCSR082RBU.Antp.adult_whole-fly_site-specific-recombination_insertion:FBgn0260642	ENCSR082RBU	Antp	FBgn0260642	adult	adult	whole-fly	NA	adult.whole-fly	whole-fly,site-specific-recombination,insertion	remap2022_ENCSR082RBU.Antp.adult_whole-fly_site-specific-recombination_insertion:FBgn0260642_ENCFF924IVP,remap2022_ENCSR082RBU.Antp.adult_whole-fly_site-specific-recombination_insertion:FBgn0260642_ENCFF194GDT,remap2022_ENCSR082RBU.Antp.adult_whole-fly_site-specific-recombination_insertion:FBgn0260642_ENCFF716FHU
ENCSR085FSS.NfI.adult_whole-fly_site-specific-recombination_insertion:FBgn0042696	ENCSR085FSS	NfI	FBgn0042696	adult	adult	whole-fly	NA	adult.whole-fly	whole-fly,site-specific-recombination,insertion	remap2022_ENCSR085FSS.NfI.adult_whole-fly_site-specific-recombination_insertion:FBgn0042696_ENCFF719REO,remap2022_ENCSR085FSS.NfI.adult_whole-fly_site-specific-recombination_insertion:FBgn0042696_ENCFF588WDQ,remap2022_ENCSR085FSS.NfI.adult_whole-fly_site-specific-recombination_insertion:FBgn0042696_ENCFF750UTQ
ENCSR086JMG.CG8478.adult_whole-fly:FBgn0037746	ENCSR086JMG	CG8478	FBgn0037746	adult	adult	whole-fly	NA	adult.whole-fly	whole-fly	remap2022_ENCSR086JMG.CG8478.adult_whole-fly:FBgn0037746_ENCFF740VEC,remap2022_ENCSR086JMG.CG8478.adult_whole-fly:FBgn0037746_ENCFF283ANG
ENCSR092TNF.lms.adult_whole-fly_site-specific-recombination_insertion:FBgn0034520	ENCSR092TNF	lms	FBgn0034520	adult	adult	whole-fly	NA	adult.whole-fly	whole-fly,site-specific-recombination,insertion	remap2022_ENCSR092TNF.lms.adult_whole-fly_site-specific-recombination_insertion:FBgn0034520_ENCFF553CJT,remap2022_ENCSR092TNF.lms.adult_whole-fly_site-specific-recombination_insertion:FBgn0034520_ENCFF350GAE
ENCSR094HIY.pad.adult_whole-fly_site-specific-recombination_insertion:FBgn0038418	ENCSR094HIY	pad	FBgn0038418	adult	adult	whole-fly	NA	adult.whole-fly	whole-fly,site-specific-recombination,insertion	remap2022_ENCSR094HIY.pad.adult_whole-fly_site-specific-recombination_insertion:FBgn0038418_ENCFF368BQI,remap2022_ENCSR094HIY.pad.adult_whole-fly_site-specific-recombination_insertion:FBgn0038418_ENCFF925QFU,remap2022_ENCSR094HIY.pad.adult_whole-fly_site-specific-recombination_insertion:FBgn0038418_ENCFF393TVE
ENCSR097DMR.Chrac-16.adult_whole-fly_site-specific-recombination_insertion:FBgn0043001	ENCSR097DMR	Chrac-16	FBgn0043001	adult	adult	whole-fly	NA	adult.whole-fly	whole-fly,site-specific-recombination,insertion	remap2022_ENCSR097DMR.Chrac-16.adult_whole-fly_site-specific-recombination_insertion:FBgn0043001_ENCFF477ONZ,remap2022_ENCSR097DMR.Chrac-16.adult_whole-fly_site-specific-recombination_insertion:FBgn0043001_ENCFF674ZNK,remap2022_ENCSR097DMR.Chrac-16.adult_whole-fly_site-specific-recombination_insertion:FBgn0043001_ENCFF918BPW
ENCSR098NCP.Dfd.adult_whole-fly_insertion:FBgn0000439	ENCSR098NCP	Dfd	FBgn0000439	adult	adult	whole-fly	NA	adult.whole-fly	whole-fly,insertion	remap2022_ENCSR098NCP.Dfd.adult_whole-fly_insertion:FBgn0000439_ENCFF413YNX,remap2022_ENCSR098NCP.Dfd.adult_whole-fly_insertion:FBgn0000439_ENCFF710ZQG
ENCSR101LNT.CG3065.adult_whole-fly_site-specific-recombination_insertion:FBgn0034946	ENCSR101LNT	CG3065	FBgn0034946	adult	adult	whole-fly	NA	adult.whole-fly	whole-fly,site-specific-recombination,insertion	remap2022_ENCSR101LNT.CG3065.adult_whole-fly_site-specific-recombination_insertion:FBgn0034946_ENCFF470ZXD,remap2022_ENCSR101LNT.CG3065.adult_whole-fly_site-specific-recombination_insertion:FBgn0034946_ENCFF457NGQ
ENCSR104XOO.trem.adult_whole-fly_site-specific-recombination_insertion:FBgn0038767	ENCSR104XOO	trem	FBgn0038767	adult	adult	whole-fly	NA	adult.whole-fly	whole-fly,site-specific-recombination,insertion	remap2022_ENCSR104XOO.trem.adult_whole-fly_site-specific-recombination_insertion:FBgn0038767_ENCFF174IOZ,remap2022_ENCSR104XOO.trem.adult_whole-fly_site-specific-recombination_insertion:FBgn0038767_ENCFF907ZDD,remap2022_ENCSR104XOO.trem.adult_whole-fly_site-specific-recombination_insertion:FBgn0038767_ENCFF691FTW
ENCSR105OGL.pum.adult_whole-fly_site-specific-recombination_insertion:FBgn0003165	ENCSR105OGL	pum	FBgn0003165	adult	adult	whole-fly	NA	adult.whole-fly	whole-fly,site-specific-recombination,insertion	remap2022_ENCSR105OGL.pum.adult_whole-fly_site-specific-recombination_insertion:FBgn0003165_ENCFF086SAX,remap2022_ENCSR105OGL.pum.adult_whole-fly_site-specific-recombination_insertion:FBgn0003165_ENCFF802PRF
ENCSR107VQE.Hr78.adult_whole-fly_insertion:FBgn0015239	ENCSR107VQE	Hr78	FBgn0015239	adult	adult	whole-fly	NA	adult.whole-fly	whole-fly,insertion	remap2022_ENCSR107VQE.Hr78.adult_whole-fly_insertion:FBgn0015239_ENCFF038RQG,remap2022_ENCSR107VQE.Hr78.adult_whole-fly_insertion:FBgn0015239_ENCFF221WVK
ENCSR109RMR.tap.adult_whole-fly_site-specific-recombination_insertion:FBgn0015550	ENCSR109RMR	tap	FBgn0015550	adult	adult	whole-fly	NA	adult.whole-fly	whole-fly,site-specific-recombination,insertion	remap2022_ENCSR109RMR.tap.adult_whole-fly_site-specific-recombination_insertion:FBgn0015550_ENCFF659GRL,remap2022_ENCSR109RMR.tap.adult_whole-fly_site-specific-recombination_insertion:FBgn0015550_ENCFF167FXD,remap2022_ENCSR109RMR.tap.adult_whole-fly_site-specific-recombination_insertion:FBgn0015550_ENCFF593WQS
ENCSR110JFN.schlank.adult_whole-fly_site-specific-recombination_insertion:FBgn0040918	ENCSR110JFN	schlank	FBgn0040918	adult	adult	whole-fly	NA	adult.whole-fly	whole-fly,site-specific-recombination,insertion	remap2022_ENCSR110JFN.schlank.adult_whole-fly_site-specific-recombination_insertion:FBgn0040918_ENCFF724ALB,remap2022_ENCSR110JFN.schlank.adult_whole-fly_site-specific-recombination_insertion:FBgn0040918_ENCFF376XFZ
ENCSR110QRS.Dlip3.adult_whole-fly_site-specific-recombination_insertion:FBgn0040465	ENCSR110QRS	Dlip3	FBgn0040465	adult	adult	whole-fly	NA	adult.whole-fly	whole-fly,site-specific-recombination,insertion	remap2022_ENCSR110QRS.Dlip3.adult_whole-fly_site-specific-recombination_insertion:FBgn0040465_ENCFF441OGL,remap2022_ENCSR110QRS.Dlip3.adult_whole-fly_site-specific-recombination_insertion:FBgn0040465_ENCFF844VJU,remap2022_ENCSR110QRS.Dlip3.adult_whole-fly_site-specific-recombination_insertion:FBgn0040465_ENCFF749YYW
ENCSR118TAH.CG17806.adult_whole-fly_site-specific-recombination_insertion:FBgn0038548	ENCSR118TAH	CG17806	FBgn0038548	adult	adult	whole-fly	NA	adult.whole-fly	whole-fly,site-specific-recombination,insertion	remap2022_ENCSR118TAH.CG17806.adult_whole-fly_site-specific-recombination_insertion:FBgn0038548_ENCFF933LOP,remap2022_ENCSR118TAH.CG17806.adult_whole-fly_site-specific-recombination_insertion:FBgn0038548_ENCFF246HBS
ENCSR119OUI.twi.adult_whole-fly_site-specific-recombination_insertion:FBgn0003900	ENCSR119OUI	twi	FBgn0003900	adult	adult	whole-fly	NA	adult.whole-fly	whole-fly,site-specific-recombination,insertion	remap2022_ENCSR119OUI.twi.adult_whole-fly_site-specific-recombination_insertion:FBgn0003900_ENCFF271FJU,remap2022_ENCSR119OUI.twi.adult_whole-fly_site-specific-recombination_insertion:FBgn0003900_ENCFF918UHG
ENCSR120ICM.Dp.adult_whole-fly_site-specific-recombination_insertion:FBgn0011763	ENCSR120ICM	Dp	FBgn0011763	adult	adult	whole-fly	NA	adult.whole-fly	whole-fly,site-specific-recombination,insertion	remap2022_ENCSR120ICM.Dp.adult_whole-fly_site-specific-recombination_insertion:FBgn0011763_ENCFF289JAC,remap2022_ENCSR120ICM.Dp.adult_whole-fly_site-specific-recombination_insertion:FBgn0011763_ENCFF983YNQ
ENCSR120TCW.Atf3.adult_whole-fly_site-specific-recombination_insertion:FBgn0028550	ENCSR120TCW	Atf3	FBgn0028550	adult	adult	whole-fly	NA	adult.whole-fly	whole-fly,site-specific-recombination,insertion	remap2022_ENCSR120TCW.Atf3.adult_whole-fly_site-specific-recombination_insertion:FBgn0028550_ENCFF186DJJ,remap2022_ENCSR120TCW.Atf3.adult_whole-fly_site-specific-recombination_insertion:FBgn0028550_ENCFF603UJL,remap2022_ENCSR120TCW.Atf3.adult_whole-fly_site-specific-recombination_insertion:FBgn0028550_ENCFF657MBU
ENCSR121SPZ.crp.adult_whole-fly_site-specific-recombination_insertion:FBgn0001994	ENCSR121SPZ	crp	FBgn0001994	adult	adult	whole-fly	NA	adult.whole-fly	whole-fly,site-specific-recombination,insertion	remap2022_ENCSR121SPZ.crp.adult_whole-fly_site-specific-recombination_insertion:FBgn0001994_ENCFF456SIX,remap2022_ENCSR121SPZ.crp.adult_whole-fly_site-specific-recombination_insertion:FBgn0001994_ENCFF871NRB,remap2022_ENCSR121SPZ.crp.adult_whole-fly_site-specific-recombination_insertion:FBgn0001994_ENCFF318LNW
ENCSR122VFA.fd3F.adult_whole-fly_site-specific-recombination_insertion:FBgn0264954	ENCSR122VFA	fd3F	FBgn0264954	adult	adult	whole-fly	NA	adult.whole-fly	whole-fly,site-specific-recombination,insertion	remap2022_ENCSR122VFA.fd3F.adult_whole-fly_site-specific-recombination_insertion:FBgn0264954_ENCFF228BHU,remap2022_ENCSR122VFA.fd3F.adult_whole-fly_site-specific-recombination_insertion:FBgn0264954_ENCFF640DWF
ENCSR125CNZ.D19A.adult_whole-fly_site-specific-recombination_insertion:FBgn0022935	ENCSR125CNZ	D19A	FBgn0022935	adult	adult	whole-fly	NA	adult.whole-fly	whole-fly,site-specific-recombination,insertion	remap2022_ENCSR125CNZ.D19A.adult_whole-fly_site-specific-recombination_insertion:FBgn0022935_ENCFF866FNZ,remap2022_ENCSR125CNZ.D19A.adult_whole-fly_site-specific-recombination_insertion:FBgn0022935_ENCFF931MCU,remap2022_ENCSR125CNZ.D19A.adult_whole-fly_site-specific-recombination_insertion:FBgn0022935_ENCFF264KAP
ENCSR125NWX.nmo.adult_whole-fly_site-specific-recombination_insertion:FBgn0011817	ENCSR125NWX	nmo	FBgn0011817	adult	adult	whole-fly	NA	adult.whole-fly	whole-fly,site-specific-recombination,insertion	remap2022_ENCSR125NWX.nmo.adult_whole-fly_site-specific-recombination_insertion:FBgn0011817_ENCFF406WWA,remap2022_ENCSR125NWX.nmo.adult_whole-fly_site-specific-recombination_insertion:FBgn0011817_ENCFF168FZL
ENCSR128VHN.dsx.adult_whole-fly_site-specific-recombination_insertion:FBgn0000504	ENCSR128VHN	dsx	FBgn0000504	adult	adult	whole-fly	NA	adult.whole-fly	whole-fly,site-specific-recombination,insertion	remap2022_ENCSR128VHN.dsx.adult_whole-fly_site-specific-recombination_insertion:FBgn0000504_ENCFF863UPI,remap2022_ENCSR128VHN.dsx.adult_whole-fly_site-specific-recombination_insertion:FBgn0000504_ENCFF799SHJ,remap2022_ENCSR128VHN.dsx.adult_whole-fly_site-specific-recombination_insertion:FBgn0000504_ENCFF683XVV,remap2022_ENCSR128VHN.dsx.adult_whole-fly_site-specific-recombination_insertion:FBgn000…
ENCSR132VFF.CG9948.adult_whole-fly_site-specific-recombination_insertion:FBgn0035721	ENCSR132VFF	CG9948	FBgn0035721	adult	adult	whole-fly	NA	adult.whole-fly	whole-fly,site-specific-recombination,insertion	remap2022_ENCSR132VFF.CG9948.adult_whole-fly_site-specific-recombination_insertion:FBgn0035721_ENCFF968QIJ,remap2022_ENCSR132VFF.CG9948.adult_whole-fly_site-specific-recombination_insertion:FBgn0035721_ENCFF610SMK
ENCSR132XDY.CG6654.adult_whole-fly_site-specific-recombination_insertion:FBgn0038301	ENCSR132XDY	CG6654	FBgn0038301	adult	adult	whole-fly	NA	adult.whole-fly	whole-fly,site-specific-recombination,insertion	remap2022_ENCSR132XDY.CG6654.adult_whole-fly_site-specific-recombination_insertion:FBgn0038301_ENCFF966VQA,remap2022_ENCSR132XDY.CG6654.adult_whole-fly_site-specific-recombination_insertion:FBgn0038301_ENCFF178YXS
ENCSR134NKA.Nf-YB.adult_whole-fly_site-specific-recombination_insertion:FBgn0032816	ENCSR134NKA	Nf-YB	FBgn0032816	adult	adult	whole-fly	NA	adult.whole-fly	whole-fly,site-specific-recombination,insertion	remap2022_ENCSR134NKA.Nf-YB.adult_whole-fly_site-specific-recombination_insertion:FBgn0032816_ENCFF506CBC,remap2022_ENCSR134NKA.Nf-YB.adult_whole-fly_site-specific-recombination_insertion:FBgn0032816_ENCFF134LZX,remap2022_ENCSR134NKA.Nf-YB.adult_whole-fly_site-specific-recombination_insertion:FBgn0032816_ENCFF237VLI
ENCSR138MDE.Rel.adult_whole-fly_site-specific-recombination_insertion:FBgn0014018	ENCSR138MDE	Rel	FBgn0014018	adult	adult	whole-fly	NA	adult.whole-fly	whole-fly,site-specific-recombination,insertion	remap2022_ENCSR138MDE.Rel.adult_whole-fly_site-specific-recombination_insertion:FBgn0014018_ENCFF099MUT,remap2022_ENCSR138MDE.Rel.adult_whole-fly_site-specific-recombination_insertion:FBgn0014018_ENCFF809BMV,remap2022_ENCSR138MDE.Rel.adult_whole-fly_site-specific-recombination_insertion:FBgn0014018_ENCFF806IYZ
ENCSR139BJY.Oli.adult_whole-fly_site-specific-recombination_insertion:FBgn0032651	ENCSR139BJY	Oli	FBgn0032651	adult	adult	whole-fly	NA	adult.whole-fly	whole-fly,site-specific-recombination,insertion	remap2022_ENCSR139BJY.Oli.adult_whole-fly_site-specific-recombination_insertion:FBgn0032651_ENCFF523XFJ,remap2022_ENCSR139BJY.Oli.adult_whole-fly_site-specific-recombination_insertion:FBgn0032651_ENCFF292NZO
ENCSR139RDU.CG12942.adult_whole-fly_site-specific-recombination_insertion:FBgn0033569	ENCSR139RDU	CG12942	FBgn0033569	adult	adult	whole-fly	NA	adult.whole-fly	whole-fly,site-specific-recombination,insertion	remap2022_ENCSR139RDU.CG12942.adult_whole-fly_site-specific-recombination_insertion:FBgn0033569_ENCFF586EJV,remap2022_ENCSR139RDU.CG12942.adult_whole-fly_site-specific-recombination_insertion:FBgn0033569_ENCFF160YTN,remap2022_ENCSR139RDU.CG12942.adult_whole-fly_site-specific-recombination_insertion:FBgn0033569_ENCFF954MKF
ENCSR140RMO.ab.adult_whole-fly_site-specific-recombination_insertion:FBgn0264442	ENCSR140RMO	ab	FBgn0264442	adult	adult	whole-fly	NA	adult.whole-fly	whole-fly,site-specific-recombination,insertion	remap2022_ENCSR140RMO.ab.adult_whole-fly_site-specific-recombination_insertion:FBgn0264442_ENCFF704KSP,remap2022_ENCSR140RMO.ab.adult_whole-fly_site-specific-recombination_insertion:FBgn0264442_ENCFF856USM
ENCSR141ZKI.CG1647.adult_whole-fly_site-specific-recombination_insertion:FBgn0039602	ENCSR141ZKI	CG1647	FBgn0039602	adult	adult	whole-fly	NA	adult.whole-fly	whole-fly,site-specific-recombination,insertion	remap2022_ENCSR141ZKI.CG1647.adult_whole-fly_site-specific-recombination_insertion:FBgn0039602_ENCFF074BSF,remap2022_ENCSR141ZKI.CG1647.adult_whole-fly_site-specific-recombination_insertion:FBgn0039602_ENCFF513ZDW,remap2022_ENCSR141ZKI.CG1647.adult_whole-fly_site-specific-recombination_insertion:FBgn0039602_ENCFF756SJQ
ENCSR143AWF.CG18262.adult_whole-fly_site-specific-recombination_insertion:FBgn0030012	ENCSR143AWF	CG18262	FBgn0030012	adult	adult	whole-fly	NA	adult.whole-fly	whole-fly,site-specific-recombination,insertion	remap2022_ENCSR143AWF.CG18262.adult_whole-fly_site-specific-recombination_insertion:FBgn0030012_ENCFF850PBF,remap2022_ENCSR143AWF.CG18262.adult_whole-fly_site-specific-recombination_insertion:FBgn0030012_ENCFF614FQK,remap2022_ENCSR143AWF.CG18262.adult_whole-fly_site-specific-recombination_insertion:FBgn0030012_ENCFF918TTA
ENCSR149KUC.CG12155.adult_whole-fly_site-specific-recombination_insertion:FBgn0029957	ENCSR149KUC	CG12155	FBgn0029957	adult	adult	whole-fly	NA	adult.whole-fly	whole-fly,site-specific-recombination,insertion	remap2022_ENCSR149KUC.CG12155.adult_whole-fly_site-specific-recombination_insertion:FBgn0029957_ENCFF734WBG,remap2022_ENCSR149KUC.CG12155.adult_whole-fly_site-specific-recombination_insertion:FBgn0029957_ENCFF488FMQ,remap2022_ENCSR149KUC.CG12155.adult_whole-fly_site-specific-recombination_insertion:FBgn0029957_ENCFF095TYY
ENCSR150QNB.Eip74EF.adult_whole-fly_insertion:FBgn0000567	ENCSR150QNB	Eip74EF	FBgn0000567	adult	adult	whole-fly	NA	adult.whole-fly	whole-fly,insertion	remap2022_ENCSR150QNB.Eip74EF.adult_whole-fly_insertion:FBgn0000567_ENCFF645OUO,remap2022_ENCSR150QNB.Eip74EF.adult_whole-fly_insertion:FBgn0000567_ENCFF674PYP
ENCSR151WSI.CG30403.adult_whole-fly_site-specific-recombination_insertion:FBgn0050403	ENCSR151WSI	CG30403	FBgn0050403	adult	adult	whole-fly	NA	adult.whole-fly	whole-fly,site-specific-recombination,insertion	remap2022_ENCSR151WSI.CG30403.adult_whole-fly_site-specific-recombination_insertion:FBgn0050403_ENCFF900UGO,remap2022_ENCSR151WSI.CG30403.adult_whole-fly_site-specific-recombination_insertion:FBgn0050403_ENCFF222OPI,remap2022_ENCSR151WSI.CG30403.adult_whole-fly_site-specific-recombination_insertion:FBgn0050403_ENCFF118FZH
ENCSR153KTS.trh.adult_whole-fly_site-specific-recombination_insertion:FBgn0262139	ENCSR153KTS	trh	FBgn0262139	adult	adult	whole-fly	NA	adult.whole-fly	whole-fly,site-specific-recombination,insertion	remap2022_ENCSR153KTS.trh.adult_whole-fly_site-specific-recombination_insertion:FBgn0262139_ENCFF479LGT,remap2022_ENCSR153KTS.trh.adult_whole-fly_site-specific-recombination_insertion:FBgn0262139_ENCFF334EBW
ENCSR155JVI.Trl.adult_whole-fly:FBgn0013263	ENCSR155JVI	Trl	FBgn0013263	adult	adult	whole-fly	NA	adult.whole-fly	whole-fly	remap2022_ENCSR155JVI.Trl.adult_whole-fly:FBgn0013263_ENCFF774DMR,remap2022_ENCSR155JVI.Trl.adult_whole-fly:FBgn0013263_ENCFF972MOP,remap2022_ENCSR155JVI.Trl.adult_whole-fly:FBgn0013263_ENCFF064WSL
ENCSR155UQM.CG10979.adult_whole-fly_site-specific-recombination_insertion:FBgn0037379	ENCSR155UQM	CG10979	FBgn0037379	adult	adult	whole-fly	NA	adult.whole-fly	whole-fly,site-specific-recombination,insertion	remap2022_ENCSR155UQM.CG10979.adult_whole-fly_site-specific-recombination_insertion:FBgn0037379_ENCFF392RNT,remap2022_ENCSR155UQM.CG10979.adult_whole-fly_site-specific-recombination_insertion:FBgn0037379_ENCFF280GSO
ENCSR156QJC.Kr.adult_whole-fly_site-specific-recombination_insertion:FBgn0001325	ENCSR156QJC	Kr	FBgn0001325	adult	adult	whole-fly	NA	adult.whole-fly	whole-fly,site-specific-recombination,insertion	remap2022_ENCSR156QJC.Kr.adult_whole-fly_site-specific-recombination_insertion:FBgn0001325_ENCFF267FIR,remap2022_ENCSR156QJC.Kr.adult_whole-fly_site-specific-recombination_insertion:FBgn0001325_ENCFF635AOG
ENCSR161OBF.Mabi.adult_whole-fly_site-specific-recombination_insertion:FBgn0032493	ENCSR161OBF	Mabi	FBgn0032493	adult	adult	whole-fly	NA	adult.whole-fly	whole-fly,site-specific-recombination,insertion	remap2022_ENCSR161OBF.Mabi.adult_whole-fly_site-specific-recombination_insertion:FBgn0032493_ENCFF275UZZ,remap2022_ENCSR161OBF.Mabi.adult_whole-fly_site-specific-recombination_insertion:FBgn0032493_ENCFF731XBC,remap2022_ENCSR161OBF.Mabi.adult_whole-fly_site-specific-recombination_insertion:FBgn0032493_ENCFF846FAS
ENCSR161YRO.Kah.adult_whole-fly_site-specific-recombination_insertion:FBgn0035144	ENCSR161YRO	Kah	FBgn0035144	adult	adult	whole-fly	NA	adult.whole-fly	whole-fly,site-specific-recombination,insertion	remap2022_ENCSR161YRO.Kah.adult_whole-fly_site-specific-recombination_insertion:FBgn0035144_ENCFF857RCV,remap2022_ENCSR161YRO.Kah.adult_whole-fly_site-specific-recombination_insertion:FBgn0035144_ENCFF761YBI
ENCSR164WWJ.fd64A.adult_whole-fly_site-specific-recombination_insertion:FBgn0004895	ENCSR164WWJ	fd64A	FBgn0004895	adult	adult	whole-fly	NA	adult.whole-fly	whole-fly,site-specific-recombination,insertion	remap2022_ENCSR164WWJ.fd64A.adult_whole-fly_site-specific-recombination_insertion:FBgn0004895_ENCFF389EWX,remap2022_ENCSR164WWJ.fd64A.adult_whole-fly_site-specific-recombination_insertion:FBgn0004895_ENCFF519WWO,remap2022_ENCSR164WWJ.fd64A.adult_whole-fly_site-specific-recombination_insertion:FBgn0004895_ENCFF696JDY
ENCSR165KWP.CG17802.adult_whole-fly_site-specific-recombination_insertion:FBgn0038549	ENCSR165KWP	CG17802	FBgn0038549	adult	adult	whole-fly	NA	adult.whole-fly	whole-fly,site-specific-recombination,insertion	remap2022_ENCSR165KWP.CG17802.adult_whole-fly_site-specific-recombination_insertion:FBgn0038549_ENCFF481QJJ,remap2022_ENCSR165KWP.CG17802.adult_whole-fly_site-specific-recombination_insertion:FBgn0038549_ENCFF015KFQ
ENCSR165OGT.topi.adult_whole-fly_site-specific-recombination_insertion:FBgn0037751	ENCSR165OGT	topi	FBgn0037751	adult	adult	whole-fly	NA	adult.whole-fly	whole-fly,site-specific-recombination,insertion	remap2022_ENCSR165OGT.topi.adult_whole-fly_site-specific-recombination_insertion:FBgn0037751_ENCFF481LBD,remap2022_ENCSR165OGT.topi.adult_whole-fly_site-specific-recombination_insertion:FBgn0037751_ENCFF760DUT,remap2022_ENCSR165OGT.topi.adult_whole-fly_site-specific-recombination_insertion:FBgn0037751_ENCFF618MPI
ENCSR166XCH.corto.adult_whole-fly_site-specific-recombination_insertion:FBgn0010313	ENCSR166XCH	corto	FBgn0010313	adult	adult	whole-fly	NA	adult.whole-fly	whole-fly,site-specific-recombination,insertion	remap2022_ENCSR166XCH.corto.adult_whole-fly_site-specific-recombination_insertion:FBgn0010313_ENCFF940QRA,remap2022_ENCSR166XCH.corto.adult_whole-fly_site-specific-recombination_insertion:FBgn0010313_ENCFF190BZP
ENCSR167BID.bcd.adult_whole-fly_site-specific-recombination_insertion:FBgn0000166	ENCSR167BID	bcd	FBgn0000166	adult	adult	whole-fly	NA	adult.whole-fly	whole-fly,site-specific-recombination,insertion	remap2022_ENCSR167BID.bcd.adult_whole-fly_site-specific-recombination_insertion:FBgn0000166_ENCFF784EPP,remap2022_ENCSR167BID.bcd.adult_whole-fly_site-specific-recombination_insertion:FBgn0000166_ENCFF234MSG
ENCSR168NHD.CrebA.adult_whole-fly_site-specific-recombination_insertion:FBgn0004396	ENCSR168NHD	CrebA	FBgn0004396	adult	adult	whole-fly	NA	adult.whole-fly	whole-fly,site-specific-recombination,insertion	remap2022_ENCSR168NHD.CrebA.adult_whole-fly_site-specific-recombination_insertion:FBgn0004396_ENCFF226SKC,remap2022_ENCSR168NHD.CrebA.adult_whole-fly_site-specific-recombination_insertion:FBgn0004396_ENCFF801QCJ
ENCSR168XBW.CG2120.adult_whole-fly_site-specific-recombination_insertion:FBgn0030005	ENCSR168XBW	CG2120	FBgn0030005	adult	adult	whole-fly	NA	adult.whole-fly	whole-fly,site-specific-recombination,insertion	remap2022_ENCSR168XBW.CG2120.adult_whole-fly_site-specific-recombination_insertion:FBgn0030005_ENCFF686QMQ,remap2022_ENCSR168XBW.CG2120.adult_whole-fly_site-specific-recombination_insertion:FBgn0030005_ENCFF048DKG,remap2022_ENCSR168XBW.CG2120.adult_whole-fly_site-specific-recombination_insertion:FBgn0030005_ENCFF599NEX
ENCSR172KOI.kay.adult_whole-fly_site-specific-recombination_insertion:FBgn0001297	ENCSR172KOI	kay	FBgn0001297	adult	adult	whole-fly	NA	adult.whole-fly	whole-fly,site-specific-recombination,insertion	remap2022_ENCSR172KOI.kay.adult_whole-fly_site-specific-recombination_insertion:FBgn0001297_ENCFF632QEX,remap2022_ENCSR172KOI.kay.adult_whole-fly_site-specific-recombination_insertion:FBgn0001297_ENCFF224ENT,remap2022_ENCSR172KOI.kay.adult_whole-fly_site-specific-recombination_insertion:FBgn0001297_ENCFF591LGO
ENCSR175KWV.Su-H.adult_whole-fly:FBgn0004837	ENCSR175KWV	Su-H	FBgn0004837	adult	adult	whole-fly	NA	adult.whole-fly	whole-fly	remap2022_ENCSR175KWV.Su-H.adult_whole-fly:FBgn0004837_ENCFF104CBF,remap2022_ENCSR175KWV.Su-H.adult_whole-fly:FBgn0004837_ENCFF465PUH
ENCSR176PDW.Six4.adult_whole-fly_site-specific-recombination_insertion:FBgn0027364	ENCSR176PDW	Six4	FBgn0027364	adult	adult	whole-fly	NA	adult.whole-fly	whole-fly,site-specific-recombination,insertion	remap2022_ENCSR176PDW.Six4.adult_whole-fly_site-specific-recombination_insertion:FBgn0027364_ENCFF778GHB,remap2022_ENCSR176PDW.Six4.adult_whole-fly_site-specific-recombination_insertion:FBgn0027364_ENCFF285BDA
ENCSR183WTG.CG2202.adult_whole-fly_site-specific-recombination_insertion:FBgn0030240	ENCSR183WTG	CG2202	FBgn0030240	adult	adult	whole-fly	NA	adult.whole-fly	whole-fly,site-specific-recombination,insertion	remap2022_ENCSR183WTG.CG2202.adult_whole-fly_site-specific-recombination_insertion:FBgn0030240_ENCFF702UMW,remap2022_ENCSR183WTG.CG2202.adult_whole-fly_site-specific-recombination_insertion:FBgn0030240_ENCFF184UEY
ENCSR184CKS.Fer1.adult_whole-fly_site-specific-recombination_insertion:FBgn0037475	ENCSR184CKS	Fer1	FBgn0037475	adult	adult	whole-fly	NA	adult.whole-fly	whole-fly,site-specific-recombination,insertion	remap2022_ENCSR184CKS.Fer1.adult_whole-fly_site-specific-recombination_insertion:FBgn0037475_ENCFF878SNM,remap2022_ENCSR184CKS.Fer1.adult_whole-fly_site-specific-recombination_insertion:FBgn0037475_ENCFF939PFW
ENCSR186ZKW.CG15696.adult_whole-fly_site-specific-recombination_insertion:FBgn0038833	ENCSR186ZKW	CG15696	FBgn0038833	adult	adult	whole-fly	NA	adult.whole-fly	whole-fly,site-specific-recombination,insertion	remap2022_ENCSR186ZKW.CG15696.adult_whole-fly_site-specific-recombination_insertion:FBgn0038833_ENCFF286UGN,remap2022_ENCSR186ZKW.CG15696.adult_whole-fly_site-specific-recombination_insertion:FBgn0038833_ENCFF393FTG
ENCSR187IVR.CG14711.adult_whole-fly_site-specific-recombination_insertion:FBgn0037922	ENCSR187IVR	CG14711	FBgn0037922	adult	adult	whole-fly	NA	adult.whole-fly	whole-fly,site-specific-recombination,insertion	remap2022_ENCSR187IVR.CG14711.adult_whole-fly_site-specific-recombination_insertion:FBgn0037922_ENCFF390JKP,remap2022_ENCSR187IVR.CG14711.adult_whole-fly_site-specific-recombination_insertion:FBgn0037922_ENCFF112DAN
ENCSR189NRY.Hsf.adult_whole-fly_site-specific-recombination_insertion:FBgn0001222	ENCSR189NRY	Hsf	FBgn0001222	adult	adult	whole-fly	NA	adult.whole-fly	whole-fly,site-specific-recombination,insertion	remap2022_ENCSR189NRY.Hsf.adult_whole-fly_site-specific-recombination_insertion:FBgn0001222_ENCFF028WFG,remap2022_ENCSR189NRY.Hsf.adult_whole-fly_site-specific-recombination_insertion:FBgn0001222_ENCFF350BPO,remap2022_ENCSR189NRY.Hsf.adult_whole-fly_site-specific-recombination_insertion:FBgn0001222_ENCFF715GDY
ENCSR190CJZ.CG9609.adult_whole-fly_site-specific-recombination_insertion:FBgn0030787	ENCSR190CJZ	CG9609	FBgn0030787	adult	adult	whole-fly	NA	adult.whole-fly	whole-fly,site-specific-recombination,insertion	remap2022_ENCSR190CJZ.CG9609.adult_whole-fly_site-specific-recombination_insertion:FBgn0030787_ENCFF747AZV,remap2022_ENCSR190CJZ.CG9609.adult_whole-fly_site-specific-recombination_insertion:FBgn0030787_ENCFF508WWF,remap2022_ENCSR190CJZ.CG9609.adult_whole-fly_site-specific-recombination_insertion:FBgn0030787_ENCFF063EYT
ENCSR191VCQ.Myc.adult_whole-fly:FBgn0262656	ENCSR191VCQ	Myc	FBgn0262656	adult	adult	whole-fly	NA	adult.whole-fly	whole-fly	remap2022_ENCSR191VCQ.Myc.adult_whole-fly:FBgn0262656_ENCFF896DWM,remap2022_ENCSR191VCQ.Myc.adult_whole-fly:FBgn0262656_ENCFF792GXW
ENCSR194LIS.CG18476.adult_whole-fly_site-specific-recombination_insertion:FBgn0037931	ENCSR194LIS	CG18476	FBgn0037931	adult	adult	whole-fly	NA	adult.whole-fly	whole-fly,site-specific-recombination,insertion	remap2022_ENCSR194LIS.CG18476.adult_whole-fly_site-specific-recombination_insertion:FBgn0037931_ENCFF262CGD,remap2022_ENCSR194LIS.CG18476.adult_whole-fly_site-specific-recombination_insertion:FBgn0037931_ENCFF309JPP
ENCSR196VPW.Hr4.adult_whole-fly_site-specific-recombination_insertion:FBgn0264562	ENCSR196VPW	Hr4	FBgn0264562	adult	adult	whole-fly	NA	adult.whole-fly	whole-fly,site-specific-recombination,insertion	remap2022_ENCSR196VPW.Hr4.adult_whole-fly_site-specific-recombination_insertion:FBgn0264562_ENCFF408BBT,remap2022_ENCSR196VPW.Hr4.adult_whole-fly_site-specific-recombination_insertion:FBgn0264562_ENCFF133VKR,remap2022_ENCSR196VPW.Hr4.adult_whole-fly_site-specific-recombination_insertion:FBgn0264562_ENCFF097VZJ
ENCSR199FME.grau.adult_whole-fly_site-specific-recombination_insertion:FBgn0001133	ENCSR199FME	grau	FBgn0001133	adult	adult	whole-fly	NA	adult.whole-fly	whole-fly,site-specific-recombination,insertion	remap2022_ENCSR199FME.grau.adult_whole-fly_site-specific-recombination_insertion:FBgn0001133_ENCFF476UXZ,remap2022_ENCSR199FME.grau.adult_whole-fly_site-specific-recombination_insertion:FBgn0001133_ENCFF544OVX,remap2022_ENCSR199FME.grau.adult_whole-fly_site-specific-recombination_insertion:FBgn0001133_ENCFF605TKS
ENCSR199TFG.tj.adult_whole-fly_site-specific-recombination_insertion:FBgn0000964	ENCSR199TFG	tj	FBgn0000964	adult	adult	whole-fly	NA	adult.whole-fly	whole-fly,site-specific-recombination,insertion	remap2022_ENCSR199TFG.tj.adult_whole-fly_site-specific-recombination_insertion:FBgn0000964_ENCFF115VDS,remap2022_ENCSR199TFG.tj.adult_whole-fly_site-specific-recombination_insertion:FBgn0000964_ENCFF619ZJL,remap2022_ENCSR199TFG.tj.adult_whole-fly_site-specific-recombination_insertion:FBgn0000964_ENCFF844OZJ
ENCSR200GOV.brk.adult_whole-fly_site-specific-recombination_insertion:FBgn0024250	ENCSR200GOV	brk	FBgn0024250	adult	adult	whole-fly	NA	adult.whole-fly	whole-fly,site-specific-recombination,insertion	remap2022_ENCSR200GOV.brk.adult_whole-fly_site-specific-recombination_insertion:FBgn0024250_ENCFF986OZV,remap2022_ENCSR200GOV.brk.adult_whole-fly_site-specific-recombination_insertion:FBgn0024250_ENCFF084REW
ENCSR202QJA.Sox15.adult_whole-fly_site-specific-recombination_insertion:FBgn0005613	ENCSR202QJA	Sox15	FBgn0005613	adult	adult	whole-fly	NA	adult.whole-fly	whole-fly,site-specific-recombination,insertion	remap2022_ENCSR202QJA.Sox15.adult_whole-fly_site-specific-recombination_insertion:FBgn0005613_ENCFF488KXS,remap2022_ENCSR202QJA.Sox15.adult_whole-fly_site-specific-recombination_insertion:FBgn0005613_ENCFF895UGG,remap2022_ENCSR202QJA.Sox15.adult_whole-fly_site-specific-recombination_insertion:FBgn0005613_ENCFF141ZJE,remap2022_ENCSR202QJA.Sox15.adult_whole-fly_site-specific-recombination_insertion…
ENCSR214LWK.CG33557.adult_whole-fly_site-specific-recombination_insertion:FBgn0053557	ENCSR214LWK	CG33557	FBgn0053557	adult	adult	whole-fly	NA	adult.whole-fly	whole-fly,site-specific-recombination,insertion	remap2022_ENCSR214LWK.CG33557.adult_whole-fly_site-specific-recombination_insertion:FBgn0053557_ENCFF076EQV,remap2022_ENCSR214LWK.CG33557.adult_whole-fly_site-specific-recombination_insertion:FBgn0053557_ENCFF738IVZ
ENCSR216AQL.zld.adult_whole-fly_site-specific-recombination_insertion:FBgn0259789	ENCSR216AQL	zld	FBgn0259789	adult	adult	whole-fly	NA	adult.whole-fly	whole-fly,site-specific-recombination,insertion	remap2022_ENCSR216AQL.zld.adult_whole-fly_site-specific-recombination_insertion:FBgn0259789_ENCFF026LBK,remap2022_ENCSR216AQL.zld.adult_whole-fly_site-specific-recombination_insertion:FBgn0259789_ENCFF592VYQ
ENCSR219AHM.Rabex-5.adult_whole-fly_site-specific-recombination_insertion:FBgn0262937	ENCSR219AHM	Rabex-5	FBgn0262937	adult	adult	whole-fly	NA	adult.whole-fly	whole-fly,site-specific-recombination,insertion	remap2022_ENCSR219AHM.Rabex-5.adult_whole-fly_site-specific-recombination_insertion:FBgn0262937_ENCFF762WCY,remap2022_ENCSR219AHM.Rabex-5.adult_whole-fly_site-specific-recombination_insertion:FBgn0262937_ENCFF664IGH,remap2022_ENCSR219AHM.Rabex-5.adult_whole-fly_site-specific-recombination_insertion:FBgn0262937_ENCFF957KWU
ENCSR220HPB.tll.adult_whole-fly_site-specific-recombination_insertion:FBgn0003720	ENCSR220HPB	tll	FBgn0003720	adult	adult	whole-fly	NA	adult.whole-fly	whole-fly,site-specific-recombination,insertion	remap2022_ENCSR220HPB.tll.adult_whole-fly_site-specific-recombination_insertion:FBgn0003720_ENCFF891HKC,remap2022_ENCSR220HPB.tll.adult_whole-fly_site-specific-recombination_insertion:FBgn0003720_ENCFF956URF
ENCSR224OFQ.vri.adult_whole-fly_site-specific-recombination_insertion:FBgn0016076	ENCSR224OFQ	vri	FBgn0016076	adult	adult	whole-fly	NA	adult.whole-fly	whole-fly,site-specific-recombination,insertion	remap2022_ENCSR224OFQ.vri.adult_whole-fly_site-specific-recombination_insertion:FBgn0016076_ENCFF932LVY,remap2022_ENCSR224OFQ.vri.adult_whole-fly_site-specific-recombination_insertion:FBgn0016076_ENCFF762OOF,remap2022_ENCSR224OFQ.vri.adult_whole-fly_site-specific-recombination_insertion:FBgn0016076_ENCFF381SWW
ENCSR224YOT.bigmax.adult_whole-fly_site-specific-recombination_insertion:FBgn0039509	ENCSR224YOT	bigmax	FBgn0039509	adult	adult	whole-fly	NA	adult.whole-fly	whole-fly,site-specific-recombination,insertion	remap2022_ENCSR224YOT.bigmax.adult_whole-fly_site-specific-recombination_insertion:FBgn0039509_ENCFF689WXQ,remap2022_ENCSR224YOT.bigmax.adult_whole-fly_site-specific-recombination_insertion:FBgn0039509_ENCFF762APG
ENCSR226MOG.CG10565.adult_whole-fly_site-specific-recombination_insertion:FBgn0037051	ENCSR226MOG	CG10565	FBgn0037051	adult	adult	whole-fly	NA	adult.whole-fly	whole-fly,site-specific-recombination,insertion	remap2022_ENCSR226MOG.CG10565.adult_whole-fly_site-specific-recombination_insertion:FBgn0037051_ENCFF682MXB,remap2022_ENCSR226MOG.CG10565.adult_whole-fly_site-specific-recombination_insertion:FBgn0037051_ENCFF726YGU,remap2022_ENCSR226MOG.CG10565.adult_whole-fly_site-specific-recombination_insertion:FBgn0037051_ENCFF268VTH
ENCSR227BSJ.CG11504.adult_whole-fly_site-specific-recombination_insertion:FBgn0039733	ENCSR227BSJ	CG11504	FBgn0039733	adult	adult	whole-fly	NA	adult.whole-fly	whole-fly,site-specific-recombination,insertion	remap2022_ENCSR227BSJ.CG11504.adult_whole-fly_site-specific-recombination_insertion:FBgn0039733_ENCFF287LRL,remap2022_ENCSR227BSJ.CG11504.adult_whole-fly_site-specific-recombination_insertion:FBgn0039733_ENCFF895KIP,remap2022_ENCSR227BSJ.CG11504.adult_whole-fly_site-specific-recombination_insertion:FBgn0039733_ENCFF915FCT
ENCSR229DNL.dsf.adult_whole-fly_site-specific-recombination_insertion:FBgn0015381	ENCSR229DNL	dsf	FBgn0015381	adult	adult	whole-fly	NA	adult.whole-fly	whole-fly,site-specific-recombination,insertion	remap2022_ENCSR229DNL.dsf.adult_whole-fly_site-specific-recombination_insertion:FBgn0015381_ENCFF443WCR,remap2022_ENCSR229DNL.dsf.adult_whole-fly_site-specific-recombination_insertion:FBgn0015381_ENCFF550YAH
ENCSR229FYE.Hr78.adult_whole-fly_insertion:FBgn0015239	ENCSR229FYE	Hr78	FBgn0015239	adult	adult	whole-fly	NA	adult.whole-fly	whole-fly,insertion	remap2022_ENCSR229FYE.Hr78.adult_whole-fly_insertion:FBgn0015239_ENCFF630LRQ,remap2022_ENCSR229FYE.Hr78.adult_whole-fly_insertion:FBgn0015239_ENCFF417AWU
ENCSR233UXG.CG6254.adult_whole-fly_site-specific-recombination_insertion:FBgn0037794	ENCSR233UXG	CG6254	FBgn0037794	adult	adult	whole-fly	NA	adult.whole-fly	whole-fly,site-specific-recombination,insertion	remap2022_ENCSR233UXG.CG6254.adult_whole-fly_site-specific-recombination_insertion:FBgn0037794_ENCFF774HNQ,remap2022_ENCSR233UXG.CG6254.adult_whole-fly_site-specific-recombination_insertion:FBgn0037794_ENCFF729SIV,remap2022_ENCSR233UXG.CG6254.adult_whole-fly_site-specific-recombination_insertion:FBgn0037794_ENCFF122EXG
ENCSR235MSK.eve.adult_whole-fly_site-specific-recombination_insertion:FBgn0000606	ENCSR235MSK	eve	FBgn0000606	adult	adult	whole-fly	NA	adult.whole-fly	whole-fly,site-specific-recombination,insertion	remap2022_ENCSR235MSK.eve.adult_whole-fly_site-specific-recombination_insertion:FBgn0000606_ENCFF435MCQ,remap2022_ENCSR235MSK.eve.adult_whole-fly_site-specific-recombination_insertion:FBgn0000606_ENCFF348DFR
ENCSR237AMN.CG14655.adult_whole-fly_site-specific-recombination_insertion:FBgn0037275	ENCSR237AMN	CG14655	FBgn0037275	adult	adult	whole-fly	NA	adult.whole-fly	whole-fly,site-specific-recombination,insertion	remap2022_ENCSR237AMN.CG14655.adult_whole-fly_site-specific-recombination_insertion:FBgn0037275_ENCFF789BFM,remap2022_ENCSR237AMN.CG14655.adult_whole-fly_site-specific-recombination_insertion:FBgn0037275_ENCFF999DGP,remap2022_ENCSR237AMN.CG14655.adult_whole-fly_site-specific-recombination_insertion:FBgn0037275_ENCFF315VBV
ENCSR237PJC.CG15601.adult_whole-fly_site-specific-recombination_insertion:FBgn0030673	ENCSR237PJC	CG15601	FBgn0030673	adult	adult	whole-fly	NA	adult.whole-fly	whole-fly,site-specific-recombination,insertion	remap2022_ENCSR237PJC.CG15601.adult_whole-fly_site-specific-recombination_insertion:FBgn0030673_ENCFF402QDK,remap2022_ENCSR237PJC.CG15601.adult_whole-fly_site-specific-recombination_insertion:FBgn0030673_ENCFF199ZLH,remap2022_ENCSR237PJC.CG15601.adult_whole-fly_site-specific-recombination_insertion:FBgn0030673_ENCFF573YQS
ENCSR239MPW.caup.adult_whole-fly_site-specific-recombination_insertion:FBgn0015919	ENCSR239MPW	caup	FBgn0015919	adult	adult	whole-fly	NA	adult.whole-fly	whole-fly,site-specific-recombination,insertion	remap2022_ENCSR239MPW.caup.adult_whole-fly_site-specific-recombination_insertion:FBgn0015919_ENCFF930OSI,remap2022_ENCSR239MPW.caup.adult_whole-fly_site-specific-recombination_insertion:FBgn0015919_ENCFF618SPJ,remap2022_ENCSR239MPW.caup.adult_whole-fly_site-specific-recombination_insertion:FBgn0015919_ENCFF006CZV
ENCSR239YEX.Hr83.adult_whole-fly_site-specific-recombination_insertion:FBgn0037436	ENCSR239YEX	Hr83	FBgn0037436	adult	adult	whole-fly	NA	adult.whole-fly	whole-fly,site-specific-recombination,insertion	remap2022_ENCSR239YEX.Hr83.adult_whole-fly_site-specific-recombination_insertion:FBgn0037436_ENCFF301FZB,remap2022_ENCSR239YEX.Hr83.adult_whole-fly_site-specific-recombination_insertion:FBgn0037436_ENCFF787ZJM
ENCSR240ADR.Stat92E.adult_whole-fly_insertion:FBgn0016917	ENCSR240ADR	Stat92E	FBgn0016917	adult	adult	whole-fly	NA	adult.whole-fly	whole-fly,insertion	remap2022_ENCSR240ADR.Stat92E.adult_whole-fly_insertion:FBgn0016917_ENCFF047YGA,remap2022_ENCSR240ADR.Stat92E.adult_whole-fly_insertion:FBgn0016917_ENCFF274EPE
ENCSR240NHL.ac.adult_whole-fly_site-specific-recombination_insertion:FBgn0000022	ENCSR240NHL	ac	FBgn0000022	adult	adult	whole-fly	NA	adult.whole-fly	whole-fly,site-specific-recombination,insertion	remap2022_ENCSR240NHL.ac.adult_whole-fly_site-specific-recombination_insertion:FBgn0000022_ENCFF074IQX,remap2022_ENCSR240NHL.ac.adult_whole-fly_site-specific-recombination_insertion:FBgn0000022_ENCFF539QLM,remap2022_ENCSR240NHL.ac.adult_whole-fly_site-specific-recombination_insertion:FBgn0000022_ENCFF472EHD
ENCSR245UCO.GATAd.adult_whole-fly_site-specific-recombination_insertion:FBgn0032223	ENCSR245UCO	GATAd	FBgn0032223	adult	adult	whole-fly	NA	adult.whole-fly	whole-fly,site-specific-recombination,insertion	remap2022_ENCSR245UCO.GATAd.adult_whole-fly_site-specific-recombination_insertion:FBgn0032223_ENCFF605NWM,remap2022_ENCSR245UCO.GATAd.adult_whole-fly_site-specific-recombination_insertion:FBgn0032223_ENCFF090JEI
ENCSR247CPK.CG1792.adult_whole-fly_site-specific-recombination_insertion:FBgn0039860	ENCSR247CPK	CG1792	FBgn0039860	adult	adult	whole-fly	NA	adult.whole-fly	whole-fly,site-specific-recombination,insertion	remap2022_ENCSR247CPK.CG1792.adult_whole-fly_site-specific-recombination_insertion:FBgn0039860_ENCFF392SFO,remap2022_ENCSR247CPK.CG1792.adult_whole-fly_site-specific-recombination_insertion:FBgn0039860_ENCFF378BKS
ENCSR247ZVM.cato.adult_whole-fly_site-specific-recombination_insertion:FBgn0024249	ENCSR247ZVM	cato	FBgn0024249	adult	adult	whole-fly	NA	adult.whole-fly	whole-fly,site-specific-recombination,insertion	remap2022_ENCSR247ZVM.cato.adult_whole-fly_site-specific-recombination_insertion:FBgn0024249_ENCFF134VPP,remap2022_ENCSR247ZVM.cato.adult_whole-fly_site-specific-recombination_insertion:FBgn0024249_ENCFF633HHV
ENCSR248JJL.chn.adult_whole-fly_site-specific-recombination_insertion:FBgn0015371	ENCSR248JJL	chn	FBgn0015371	adult	adult	whole-fly	NA	adult.whole-fly	whole-fly,site-specific-recombination,insertion	remap2022_ENCSR248JJL.chn.adult_whole-fly_site-specific-recombination_insertion:FBgn0015371_ENCFF222XRD,remap2022_ENCSR248JJL.chn.adult_whole-fly_site-specific-recombination_insertion:FBgn0015371_ENCFF363RWB
ENCSR249JVE.hth.adult_whole-fly:FBgn0001235	ENCSR249JVE	hth	FBgn0001235	adult	adult	whole-fly	NA	adult.whole-fly	whole-fly	remap2022_ENCSR249JVE.hth.adult_whole-fly:FBgn0001235_ENCFF655BBR,remap2022_ENCSR249JVE.hth.adult_whole-fly:FBgn0001235_ENCFF202MEC
ENCSR255PHG.CG6276.adult_whole-fly_site-specific-recombination_insertion:FBgn0038316	ENCSR255PHG	CG6276	FBgn0038316	adult	adult	whole-fly	NA	adult.whole-fly	whole-fly,site-specific-recombination,insertion	remap2022_ENCSR255PHG.CG6276.adult_whole-fly_site-specific-recombination_insertion:FBgn0038316_ENCFF539JUF,remap2022_ENCSR255PHG.CG6276.adult_whole-fly_site-specific-recombination_insertion:FBgn0038316_ENCFF418FNJ
ENCSR259WOE.zfh2.adult_whole-fly_site-specific-recombination_insertion:FBgn0004607	ENCSR259WOE	zfh2	FBgn0004607	adult	adult	whole-fly	NA	adult.whole-fly	whole-fly,site-specific-recombination,insertion	remap2022_ENCSR259WOE.zfh2.adult_whole-fly_site-specific-recombination_insertion:FBgn0004607_ENCFF011LNH,remap2022_ENCSR259WOE.zfh2.adult_whole-fly_site-specific-recombination_insertion:FBgn0004607_ENCFF374TTF
ENCSR261RKJ.MTF-1.adult_whole-fly_site-specific-recombination_insertion:FBgn0040305	ENCSR261RKJ	MTF-1	FBgn0040305	adult	adult	whole-fly	NA	adult.whole-fly	whole-fly,site-specific-recombination,insertion	remap2022_ENCSR261RKJ.MTF-1.adult_whole-fly_site-specific-recombination_insertion:FBgn0040305_ENCFF170HFA,remap2022_ENCSR261RKJ.MTF-1.adult_whole-fly_site-specific-recombination_insertion:FBgn0040305_ENCFF420DBJ
ENCSR263AYM.CG3281.adult_whole-fly_site-specific-recombination_insertion:FBgn0260741	ENCSR263AYM	CG3281	FBgn0260741	adult	adult	whole-fly	NA	adult.whole-fly	whole-fly,site-specific-recombination,insertion	remap2022_ENCSR263AYM.CG3281.adult_whole-fly_site-specific-recombination_insertion:FBgn0260741_ENCFF041PBW,remap2022_ENCSR263AYM.CG3281.adult_whole-fly_site-specific-recombination_insertion:FBgn0260741_ENCFF349MZB,remap2022_ENCSR263AYM.CG3281.adult_whole-fly_site-specific-recombination_insertion:FBgn0260741_ENCFF942JQS
ENCSR264MBG.Sin3A.Kc167:FBgn0022764	ENCSR264MBG	Sin3A	FBgn0022764	Kc167:FBgn0022764	Kc	Kc	NA	Kc		remap2022_ENCSR264MBG.Sin3A.Kc167:FBgn0022764_ENCFF515LPH,remap2022_ENCSR264MBG.Sin3A.Kc167:FBgn0022764_ENCFF708WHR
ENCSR266CSS.CG3407.adult_whole-fly_site-specific-recombination_insertion:FBgn0031573	ENCSR266CSS	CG3407	FBgn0031573	adult	adult	whole-fly	NA	adult.whole-fly	whole-fly,site-specific-recombination,insertion	remap2022_ENCSR266CSS.CG3407.adult_whole-fly_site-specific-recombination_insertion:FBgn0031573_ENCFF462CVJ,remap2022_ENCSR266CSS.CG3407.adult_whole-fly_site-specific-recombination_insertion:FBgn0031573_ENCFF480IIJ
ENCSR266HYG.oc.adult_whole-fly_site-specific-recombination_insertion:FBgn0004102	ENCSR266HYG	oc	FBgn0004102	adult	adult	whole-fly	NA	adult.whole-fly	whole-fly,site-specific-recombination,insertion	remap2022_ENCSR266HYG.oc.adult_whole-fly_site-specific-recombination_insertion:FBgn0004102_ENCFF919OIL,remap2022_ENCSR266HYG.oc.adult_whole-fly_site-specific-recombination_insertion:FBgn0004102_ENCFF043HET
ENCSR269HHK.kay.adult_whole-fly_site-specific-recombination_insertion:FBgn0001297	ENCSR269HHK	kay	FBgn0001297	adult	adult	whole-fly	NA	adult.whole-fly	whole-fly,site-specific-recombination,insertion	remap2022_ENCSR269HHK.kay.adult_whole-fly_site-specific-recombination_insertion:FBgn0001297_ENCFF347ECN,remap2022_ENCSR269HHK.kay.adult_whole-fly_site-specific-recombination_insertion:FBgn0001297_ENCFF087WXT
ENCSR271OGF.prd.adult_whole-fly:FBgn0003145	ENCSR271OGF	prd	FBgn0003145	adult	adult	whole-fly	NA	adult.whole-fly	whole-fly	remap2022_ENCSR271OGF.prd.adult_whole-fly:FBgn0003145_ENCFF529KSE,remap2022_ENCSR271OGF.prd.adult_whole-fly:FBgn0003145_ENCFF720TUS
ENCSR271VMW.Hr38.adult_whole-fly_site-specific-recombination_insertion:FBgn0014859	ENCSR271VMW	Hr38	FBgn0014859	adult	adult	whole-fly	NA	adult.whole-fly	whole-fly,site-specific-recombination,insertion	remap2022_ENCSR271VMW.Hr38.adult_whole-fly_site-specific-recombination_insertion:FBgn0014859_ENCFF808COC,remap2022_ENCSR271VMW.Hr38.adult_whole-fly_site-specific-recombination_insertion:FBgn0014859_ENCFF812KUG
ENCSR271ZJI.REPTOR-BP.adult_whole-fly_site-specific-recombination_insertion:FBgn0032202	ENCSR271ZJI	REPTOR-BP	FBgn0032202	adult	adult	whole-fly	NA	adult.whole-fly	whole-fly,site-specific-recombination,insertion	remap2022_ENCSR271ZJI.REPTOR-BP.adult_whole-fly_site-specific-recombination_insertion:FBgn0032202_ENCFF015AHM,remap2022_ENCSR271ZJI.REPTOR-BP.adult_whole-fly_site-specific-recombination_insertion:FBgn0032202_ENCFF555QHM,remap2022_ENCSR271ZJI.REPTOR-BP.adult_whole-fly_site-specific-recombination_insertion:FBgn0032202_ENCFF740ACJ
ENCSR272DEA.Lhr.adult_whole-fly_site-specific-recombination_insertion:FBgn0034217	ENCSR272DEA	Lhr	FBgn0034217	adult	adult	whole-fly	NA	adult.whole-fly	whole-fly,site-specific-recombination,insertion	remap2022_ENCSR272DEA.Lhr.adult_whole-fly_site-specific-recombination_insertion:FBgn0034217_ENCFF732HNJ,remap2022_ENCSR272DEA.Lhr.adult_whole-fly_site-specific-recombination_insertion:FBgn0034217_ENCFF714SJG,remap2022_ENCSR272DEA.Lhr.adult_whole-fly_site-specific-recombination_insertion:FBgn0034217_ENCFF023KQA
ENCSR273JZM.crc.adult_whole-fly_site-specific-recombination_insertion:FBgn0000370	ENCSR273JZM	crc	FBgn0000370	adult	adult	whole-fly	NA	adult.whole-fly	whole-fly,site-specific-recombination,insertion	remap2022_ENCSR273JZM.crc.adult_whole-fly_site-specific-recombination_insertion:FBgn0000370_ENCFF564QUD,remap2022_ENCSR273JZM.crc.adult_whole-fly_site-specific-recombination_insertion:FBgn0000370_ENCFF015CCD
ENCSR274AAR.CG8924.adult_whole-fly_site-specific-recombination_insertion:FBgn0030710	ENCSR274AAR	CG8924	FBgn0030710	adult	adult	whole-fly	NA	adult.whole-fly	whole-fly,site-specific-recombination,insertion	remap2022_ENCSR274AAR.CG8924.adult_whole-fly_site-specific-recombination_insertion:FBgn0030710_ENCFF885IEG,remap2022_ENCSR274AAR.CG8924.adult_whole-fly_site-specific-recombination_insertion:FBgn0030710_ENCFF458ZOA,remap2022_ENCSR274AAR.CG8924.adult_whole-fly_site-specific-recombination_insertion:FBgn0030710_ENCFF786PCN,remap2022_ENCSR274AAR.CG8924.adult_whole-fly_site-specific-recombination_inser…
ENCSR276LGX.salm.adult_whole-fly_site-specific-recombination_insertion:FBgn0261648	ENCSR276LGX	salm	FBgn0261648	adult	adult	whole-fly	NA	adult.whole-fly	whole-fly,site-specific-recombination,insertion	remap2022_ENCSR276LGX.salm.adult_whole-fly_site-specific-recombination_insertion:FBgn0261648_ENCFF379KRE,remap2022_ENCSR276LGX.salm.adult_whole-fly_site-specific-recombination_insertion:FBgn0261648_ENCFF317GTJ
ENCSR278IBK.CG6808.adult_whole-fly_site-specific-recombination_insertion:FBgn0037921	ENCSR278IBK	CG6808	FBgn0037921	adult	adult	whole-fly	NA	adult.whole-fly	whole-fly,site-specific-recombination,insertion	remap2022_ENCSR278IBK.CG6808.adult_whole-fly_site-specific-recombination_insertion:FBgn0037921_ENCFF739GXL,remap2022_ENCSR278IBK.CG6808.adult_whole-fly_site-specific-recombination_insertion:FBgn0037921_ENCFF291HKL,remap2022_ENCSR278IBK.CG6808.adult_whole-fly_site-specific-recombination_insertion:FBgn0037921_ENCFF448AQX
ENCSR279HMO.crp.adult_whole-fly_site-specific-recombination_insertion:FBgn0001994	ENCSR279HMO	crp	FBgn0001994	adult	adult	whole-fly	NA	adult.whole-fly	whole-fly,site-specific-recombination,insertion	remap2022_ENCSR279HMO.crp.adult_whole-fly_site-specific-recombination_insertion:FBgn0001994_ENCFF814LXY,remap2022_ENCSR279HMO.crp.adult_whole-fly_site-specific-recombination_insertion:FBgn0001994_ENCFF210ATC
ENCSR280XEB.Hr78.adult_whole-fly_insertion:FBgn0015239	ENCSR280XEB	Hr78	FBgn0015239	adult	adult	whole-fly	NA	adult.whole-fly	whole-fly,insertion	remap2022_ENCSR280XEB.Hr78.adult_whole-fly_insertion:FBgn0015239_ENCFF319IIP,remap2022_ENCSR280XEB.Hr78.adult_whole-fly_insertion:FBgn0015239_ENCFF040KKO
ENCSR281ORM.Sox102F.adult_whole-fly_site-specific-recombination_insertion:FBgn0039938	ENCSR281ORM	Sox102F	FBgn0039938	adult	adult	whole-fly	NA	adult.whole-fly	whole-fly,site-specific-recombination,insertion	remap2022_ENCSR281ORM.Sox102F.adult_whole-fly_site-specific-recombination_insertion:FBgn0039938_ENCFF976CHJ,remap2022_ENCSR281ORM.Sox102F.adult_whole-fly_site-specific-recombination_insertion:FBgn0039938_ENCFF718LKK
ENCSR283UXP.slp2.adult_whole-fly_site-specific-recombination_insertion:FBgn0004567	ENCSR283UXP	slp2	FBgn0004567	adult	adult	whole-fly	NA	adult.whole-fly	whole-fly,site-specific-recombination,insertion	remap2022_ENCSR283UXP.slp2.adult_whole-fly_site-specific-recombination_insertion:FBgn0004567_ENCFF910RRV,remap2022_ENCSR283UXP.slp2.adult_whole-fly_site-specific-recombination_insertion:FBgn0004567_ENCFF316GLJ
ENCSR287NIU.CG11617.adult_whole-fly_site-specific-recombination_insertion:FBgn0031232	ENCSR287NIU	CG11617	FBgn0031232	adult	adult	whole-fly	NA	adult.whole-fly	whole-fly,site-specific-recombination,insertion	remap2022_ENCSR287NIU.CG11617.adult_whole-fly_site-specific-recombination_insertion:FBgn0031232_ENCFF595XNL,remap2022_ENCSR287NIU.CG11617.adult_whole-fly_site-specific-recombination_insertion:FBgn0031232_ENCFF038SDS
ENCSR288BZG.SREBP.adult_whole-fly_site-specific-recombination_insertion:FBgn0261283	ENCSR288BZG	SREBP	FBgn0261283	adult	adult	whole-fly	NA	adult.whole-fly	whole-fly,site-specific-recombination,insertion	remap2022_ENCSR288BZG.SREBP.adult_whole-fly_site-specific-recombination_insertion:FBgn0261283_ENCFF956ZVX,remap2022_ENCSR288BZG.SREBP.adult_whole-fly_site-specific-recombination_insertion:FBgn0261283_ENCFF632NOL,remap2022_ENCSR288BZG.SREBP.adult_whole-fly_site-specific-recombination_insertion:FBgn0261283_ENCFF552OXR
ENCSR290OJD.Stat92E.adult_whole-fly_insertion:FBgn0016917	ENCSR290OJD	Stat92E	FBgn0016917	adult	adult	whole-fly	NA	adult.whole-fly	whole-fly,insertion	remap2022_ENCSR290OJD.Stat92E.adult_whole-fly_insertion:FBgn0016917_ENCFF677DJI,remap2022_ENCSR290OJD.Stat92E.adult_whole-fly_insertion:FBgn0016917_ENCFF056WPO
ENCSR291KUB.Rel.adult_whole-fly_site-specific-recombination_insertion:FBgn0014018	ENCSR291KUB	Rel	FBgn0014018	adult	adult	whole-fly	NA	adult.whole-fly	whole-fly,site-specific-recombination,insertion	remap2022_ENCSR291KUB.Rel.adult_whole-fly_site-specific-recombination_insertion:FBgn0014018_ENCFF658GCJ,remap2022_ENCSR291KUB.Rel.adult_whole-fly_site-specific-recombination_insertion:FBgn0014018_ENCFF608PMP
ENCSR291ZDB.CG4424.adult_whole-fly_site-specific-recombination_insertion:FBgn0038765	ENCSR291ZDB	CG4424	FBgn0038765	adult	adult	whole-fly	NA	adult.whole-fly	whole-fly,site-specific-recombination,insertion	remap2022_ENCSR291ZDB.CG4424.adult_whole-fly_site-specific-recombination_insertion:FBgn0038765_ENCFF990WQA,remap2022_ENCSR291ZDB.CG4424.adult_whole-fly_site-specific-recombination_insertion:FBgn0038765_ENCFF750UPQ,remap2022_ENCSR291ZDB.CG4424.adult_whole-fly_site-specific-recombination_insertion:FBgn0038765_ENCFF516TDC,remap2022_ENCSR291ZDB.CG4424.adult_whole-fly_site-specific-recombination_inser…
ENCSR292EYZ.lola.adult_whole-fly_site-specific-recombination_insertion:FBgn0283521	ENCSR292EYZ	lola	FBgn0283521	adult	adult	whole-fly	NA	adult.whole-fly	whole-fly,site-specific-recombination,insertion	remap2022_ENCSR292EYZ.lola.adult_whole-fly_site-specific-recombination_insertion:FBgn0283521_ENCFF932QPK,remap2022_ENCSR292EYZ.lola.adult_whole-fly_site-specific-recombination_insertion:FBgn0283521_ENCFF382UCF
ENCSR292WNJ.Pfk.adult_whole-fly_site-specific-recombination_insertion:FBgn0003071	ENCSR292WNJ	Pfk	FBgn0003071	adult	adult	whole-fly	NA	adult.whole-fly	whole-fly,site-specific-recombination,insertion	remap2022_ENCSR292WNJ.Pfk.adult_whole-fly_site-specific-recombination_insertion:FBgn0003071_ENCFF912BIT,remap2022_ENCSR292WNJ.Pfk.adult_whole-fly_site-specific-recombination_insertion:FBgn0003071_ENCFF919UKD
ENCSR295CRU.MESR4.adult_whole-fly_site-specific-recombination_insertion:FBgn0034240	ENCSR295CRU	MESR4	FBgn0034240	adult	adult	whole-fly	NA	adult.whole-fly	whole-fly,site-specific-recombination,insertion	remap2022_ENCSR295CRU.MESR4.adult_whole-fly_site-specific-recombination_insertion:FBgn0034240_ENCFF956MCO,remap2022_ENCSR295CRU.MESR4.adult_whole-fly_site-specific-recombination_insertion:FBgn0034240_ENCFF575BZI
ENCSR295GRP.br.adult_whole-fly_site-specific-recombination_insertion:FBgn0283451	ENCSR295GRP	br	FBgn0283451	adult	adult	whole-fly	NA	adult.whole-fly	whole-fly,site-specific-recombination,insertion	remap2022_ENCSR295GRP.br.adult_whole-fly_site-specific-recombination_insertion:FBgn0283451_ENCFF184JOD,remap2022_ENCSR295GRP.br.adult_whole-fly_site-specific-recombination_insertion:FBgn0283451_ENCFF550QHK,remap2022_ENCSR295GRP.br.adult_whole-fly_site-specific-recombination_insertion:FBgn0283451_ENCFF141GAC
ENCSR295UVI.nom.adult_whole-fly_site-specific-recombination_insertion:FBgn0037617	ENCSR295UVI	nom	FBgn0037617	adult	adult	whole-fly	NA	adult.whole-fly	whole-fly,site-specific-recombination,insertion	remap2022_ENCSR295UVI.nom.adult_whole-fly_site-specific-recombination_insertion:FBgn0037617_ENCFF280VAE,remap2022_ENCSR295UVI.nom.adult_whole-fly_site-specific-recombination_insertion:FBgn0037617_ENCFF083KYB
ENCSR296ASC.Neu2.adult_whole-fly_site-specific-recombination_insertion:FBgn0037085	ENCSR296ASC	Neu2	FBgn0037085	adult	adult	whole-fly	NA	adult.whole-fly	whole-fly,site-specific-recombination,insertion	remap2022_ENCSR296ASC.Neu2.adult_whole-fly_site-specific-recombination_insertion:FBgn0037085_ENCFF517HPG,remap2022_ENCSR296ASC.Neu2.adult_whole-fly_site-specific-recombination_insertion:FBgn0037085_ENCFF189STL,remap2022_ENCSR296ASC.Neu2.adult_whole-fly_site-specific-recombination_insertion:FBgn0037085_ENCFF487KQM
ENCSR296MRL.CG17385.adult_whole-fly_site-specific-recombination_insertion:FBgn0033934	ENCSR296MRL	CG17385	FBgn0033934	adult	adult	whole-fly	NA	adult.whole-fly	whole-fly,site-specific-recombination,insertion	remap2022_ENCSR296MRL.CG17385.adult_whole-fly_site-specific-recombination_insertion:FBgn0033934_ENCFF043TDN,remap2022_ENCSR296MRL.CG17385.adult_whole-fly_site-specific-recombination_insertion:FBgn0033934_ENCFF225XCT,remap2022_ENCSR296MRL.CG17385.adult_whole-fly_site-specific-recombination_insertion:FBgn0033934_ENCFF007RDH
ENCSR302AQS.CG4707.adult_whole-fly_site-specific-recombination_insertion:FBgn0035036	ENCSR302AQS	CG4707	FBgn0035036	adult	adult	whole-fly	NA	adult.whole-fly	whole-fly,site-specific-recombination,insertion	remap2022_ENCSR302AQS.CG4707.adult_whole-fly_site-specific-recombination_insertion:FBgn0035036_ENCFF082IEH,remap2022_ENCSR302AQS.CG4707.adult_whole-fly_site-specific-recombination_insertion:FBgn0035036_ENCFF817APD
ENCSR303EBD.Lpt.adult_whole-fly_site-specific-recombination_insertion:FBgn0263667	ENCSR303EBD	Lpt	FBgn0263667	adult	adult	whole-fly	NA	adult.whole-fly	whole-fly,site-specific-recombination,insertion	remap2022_ENCSR303EBD.Lpt.adult_whole-fly_site-specific-recombination_insertion:FBgn0263667_ENCFF947PBK,remap2022_ENCSR303EBD.Lpt.adult_whole-fly_site-specific-recombination_insertion:FBgn0263667_ENCFF281FXT,remap2022_ENCSR303EBD.Lpt.adult_whole-fly_site-specific-recombination_insertion:FBgn0263667_ENCFF919DVE
ENCSR303MJE.usp.adult_whole-fly_insertion:FBgn0003964	ENCSR303MJE	usp	FBgn0003964	adult	adult	whole-fly	NA	adult.whole-fly	whole-fly,insertion	remap2022_ENCSR303MJE.usp.adult_whole-fly_insertion:FBgn0003964_ENCFF261FOL,remap2022_ENCSR303MJE.usp.adult_whole-fly_insertion:FBgn0003964_ENCFF220DAK
ENCSR308HCJ.Smox.adult_whole-fly_site-specific-recombination_insertion:FBgn0025800	ENCSR308HCJ	Smox	FBgn0025800	adult	adult	whole-fly	NA	adult.whole-fly	whole-fly,site-specific-recombination,insertion	remap2022_ENCSR308HCJ.Smox.adult_whole-fly_site-specific-recombination_insertion:FBgn0025800_ENCFF154FXL,remap2022_ENCSR308HCJ.Smox.adult_whole-fly_site-specific-recombination_insertion:FBgn0025800_ENCFF233MSS,remap2022_ENCSR308HCJ.Smox.adult_whole-fly_site-specific-recombination_insertion:FBgn0025800_ENCFF220PSN
ENCSR310ZJI.bsh.adult_whole-fly_site-specific-recombination_insertion:FBgn0000529	ENCSR310ZJI	bsh	FBgn0000529	adult	adult	whole-fly	NA	adult.whole-fly	whole-fly,site-specific-recombination,insertion	remap2022_ENCSR310ZJI.bsh.adult_whole-fly_site-specific-recombination_insertion:FBgn0000529_ENCFF540GOQ,remap2022_ENCSR310ZJI.bsh.adult_whole-fly_site-specific-recombination_insertion:FBgn0000529_ENCFF623YUH
ENCSR312RCJ.spab.adult_whole-fly_site-specific-recombination_insertion:FBgn0033358	ENCSR312RCJ	spab	FBgn0033358	adult	adult	whole-fly	NA	adult.whole-fly	whole-fly,site-specific-recombination,insertion	remap2022_ENCSR312RCJ.spab.adult_whole-fly_site-specific-recombination_insertion:FBgn0033358_ENCFF660QHJ,remap2022_ENCSR312RCJ.spab.adult_whole-fly_site-specific-recombination_insertion:FBgn0033358_ENCFF600KOH
ENCSR313RIH.CG10654.adult_whole-fly_site-specific-recombination_insertion:FBgn0036294	ENCSR313RIH	CG10654	FBgn0036294	adult	adult	whole-fly	NA	adult.whole-fly	whole-fly,site-specific-recombination,insertion	remap2022_ENCSR313RIH.CG10654.adult_whole-fly_site-specific-recombination_insertion:FBgn0036294_ENCFF971UBM,remap2022_ENCSR313RIH.CG10654.adult_whole-fly_site-specific-recombination_insertion:FBgn0036294_ENCFF587RKV
ENCSR313TWF.CG31365.adult_whole-fly_site-specific-recombination_insertion:FBgn0051365	ENCSR313TWF	CG31365	FBgn0051365	adult	adult	whole-fly	NA	adult.whole-fly	whole-fly,site-specific-recombination,insertion	remap2022_ENCSR313TWF.CG31365.adult_whole-fly_site-specific-recombination_insertion:FBgn0051365_ENCFF878MDT,remap2022_ENCSR313TWF.CG31365.adult_whole-fly_site-specific-recombination_insertion:FBgn0051365_ENCFF292GTG
ENCSR315AML.Hand.adult_whole-fly_site-specific-recombination_insertion:FBgn0032209	ENCSR315AML	Hand	FBgn0032209	adult	adult	whole-fly	NA	adult.whole-fly	whole-fly,site-specific-recombination,insertion	remap2022_ENCSR315AML.Hand.adult_whole-fly_site-specific-recombination_insertion:FBgn0032209_ENCFF163EIQ,remap2022_ENCSR315AML.Hand.adult_whole-fly_site-specific-recombination_insertion:FBgn0032209_ENCFF902SPU
ENCSR316FKJ.wek.adult_whole-fly_site-specific-recombination_insertion:FBgn0001990	ENCSR316FKJ	wek	FBgn0001990	adult	adult	whole-fly	NA	adult.whole-fly	whole-fly,site-specific-recombination,insertion	remap2022_ENCSR316FKJ.wek.adult_whole-fly_site-specific-recombination_insertion:FBgn0001990_ENCFF398VOR,remap2022_ENCSR316FKJ.wek.adult_whole-fly_site-specific-recombination_insertion:FBgn0001990_ENCFF772GRI,remap2022_ENCSR316FKJ.wek.adult_whole-fly_site-specific-recombination_insertion:FBgn0001990_ENCFF729FIS
ENCSR317SVS.acj6.adult_whole-fly_site-specific-recombination_insertion:FBgn0000028	ENCSR317SVS	acj6	FBgn0000028	adult	adult	whole-fly	NA	adult.whole-fly	whole-fly,site-specific-recombination,insertion	remap2022_ENCSR317SVS.acj6.adult_whole-fly_site-specific-recombination_insertion:FBgn0000028_ENCFF616VVC,remap2022_ENCSR317SVS.acj6.adult_whole-fly_site-specific-recombination_insertion:FBgn0000028_ENCFF842JQB,remap2022_ENCSR317SVS.acj6.adult_whole-fly_site-specific-recombination_insertion:FBgn0000028_ENCFF652VIU
ENCSR317XOG.CG30020.adult_whole-fly_site-specific-recombination_insertion:FBgn0050020	ENCSR317XOG	CG30020	FBgn0050020	adult	adult	whole-fly	NA	adult.whole-fly	whole-fly,site-specific-recombination,insertion	remap2022_ENCSR317XOG.CG30020.adult_whole-fly_site-specific-recombination_insertion:FBgn0050020_ENCFF463BNL,remap2022_ENCSR317XOG.CG30020.adult_whole-fly_site-specific-recombination_insertion:FBgn0050020_ENCFF034KCB
ENCSR319MRG.D.adult_whole-fly:FBgn0000411	ENCSR319MRG	D	FBgn0000411	adult	adult	whole-fly	NA	adult.whole-fly	whole-fly	remap2022_ENCSR319MRG.D.adult_whole-fly:FBgn0000411_ENCFF849MTC,remap2022_ENCSR319MRG.D.adult_whole-fly:FBgn0000411_ENCFF468LYR
ENCSR321YHE.CG1233.adult_whole-fly_site-specific-recombination_insertion:FBgn0035137	ENCSR321YHE	CG1233	FBgn0035137	adult	adult	whole-fly	NA	adult.whole-fly	whole-fly,site-specific-recombination,insertion	remap2022_ENCSR321YHE.CG1233.adult_whole-fly_site-specific-recombination_insertion:FBgn0035137_ENCFF973OYR,remap2022_ENCSR321YHE.CG1233.adult_whole-fly_site-specific-recombination_insertion:FBgn0035137_ENCFF038BXI,remap2022_ENCSR321YHE.CG1233.adult_whole-fly_site-specific-recombination_insertion:FBgn0035137_ENCFF742ETL,remap2022_ENCSR321YHE.CG1233.adult_whole-fly_site-specific-recombination_inser…
ENCSR324QVN.Hmr.adult_whole-fly_site-specific-recombination_insertion:FBgn0001206	ENCSR324QVN	Hmr	FBgn0001206	adult	adult	whole-fly	NA	adult.whole-fly	whole-fly,site-specific-recombination,insertion	remap2022_ENCSR324QVN.Hmr.adult_whole-fly_site-specific-recombination_insertion:FBgn0001206_ENCFF582NYN,remap2022_ENCSR324QVN.Hmr.adult_whole-fly_site-specific-recombination_insertion:FBgn0001206_ENCFF253UZL,remap2022_ENCSR324QVN.Hmr.adult_whole-fly_site-specific-recombination_insertion:FBgn0001206_ENCFF671KYR
ENCSR325UBZ.Su-H.adult_whole-fly_site-specific-recombination_insertion:FBgn0004837	ENCSR325UBZ	Su-H	FBgn0004837	adult	adult	whole-fly	NA	adult.whole-fly	whole-fly,site-specific-recombination,insertion	remap2022_ENCSR325UBZ.Su-H.adult_whole-fly_site-specific-recombination_insertion:FBgn0004837_ENCFF496MCN,remap2022_ENCSR325UBZ.Su-H.adult_whole-fly_site-specific-recombination_insertion:FBgn0004837_ENCFF120SFB,remap2022_ENCSR325UBZ.Su-H.adult_whole-fly_site-specific-recombination_insertion:FBgn0004837_ENCFF496CEF
ENCSR327ZQL.CG18599.adult_whole-fly_site-specific-recombination_insertion:FBgn0038592	ENCSR327ZQL	CG18599	FBgn0038592	adult	adult	whole-fly	NA	adult.whole-fly	whole-fly,site-specific-recombination,insertion	remap2022_ENCSR327ZQL.CG18599.adult_whole-fly_site-specific-recombination_insertion:FBgn0038592_ENCFF563GHA,remap2022_ENCSR327ZQL.CG18599.adult_whole-fly_site-specific-recombination_insertion:FBgn0038592_ENCFF871LAP,remap2022_ENCSR327ZQL.CG18599.adult_whole-fly_site-specific-recombination_insertion:FBgn0038592_ENCFF274JPO
ENCSR332BCD.pita.adult_whole-fly_site-specific-recombination_insertion:FBgn0034878	ENCSR332BCD	pita	FBgn0034878	adult	adult	whole-fly	NA	adult.whole-fly	whole-fly,site-specific-recombination,insertion	remap2022_ENCSR332BCD.pita.adult_whole-fly_site-specific-recombination_insertion:FBgn0034878_ENCFF147AIV,remap2022_ENCSR332BCD.pita.adult_whole-fly_site-specific-recombination_insertion:FBgn0034878_ENCFF466AYB
ENCSR332DSH.Plzf.adult_whole-fly_site-specific-recombination_insertion:FBgn0032401	ENCSR332DSH	Plzf	FBgn0032401	adult	adult	whole-fly	NA	adult.whole-fly	whole-fly,site-specific-recombination,insertion	remap2022_ENCSR332DSH.Plzf.adult_whole-fly_site-specific-recombination_insertion:FBgn0032401_ENCFF421DGH,remap2022_ENCSR332DSH.Plzf.adult_whole-fly_site-specific-recombination_insertion:FBgn0032401_ENCFF318BSX,remap2022_ENCSR332DSH.Plzf.adult_whole-fly_site-specific-recombination_insertion:FBgn0032401_ENCFF725BCX,remap2022_ENCSR332DSH.Plzf.adult_whole-fly_site-specific-recombination_insertion:FBg…
ENCSR335NNR.nerfin-1.adult_whole-fly_site-specific-recombination_insertion:FBgn0028999	ENCSR335NNR	nerfin-1	FBgn0028999	adult	adult	whole-fly	NA	adult.whole-fly	whole-fly,site-specific-recombination,insertion	remap2022_ENCSR335NNR.nerfin-1.adult_whole-fly_site-specific-recombination_insertion:FBgn0028999_ENCFF358JIV,remap2022_ENCSR335NNR.nerfin-1.adult_whole-fly_site-specific-recombination_insertion:FBgn0028999_ENCFF063KAP,remap2022_ENCSR335NNR.nerfin-1.adult_whole-fly_site-specific-recombination_insertion:FBgn0028999_ENCFF023PNW
ENCSR335QAE.svp.adult_whole-fly_site-specific-recombination_insertion:FBgn0003651	ENCSR335QAE	svp	FBgn0003651	adult	adult	whole-fly	NA	adult.whole-fly	whole-fly,site-specific-recombination,insertion	remap2022_ENCSR335QAE.svp.adult_whole-fly_site-specific-recombination_insertion:FBgn0003651_ENCFF697LJK,remap2022_ENCSR335QAE.svp.adult_whole-fly_site-specific-recombination_insertion:FBgn0003651_ENCFF664QSN,remap2022_ENCSR335QAE.svp.adult_whole-fly_site-specific-recombination_insertion:FBgn0003651_ENCFF598MAC
ENCSR335WXQ.hng2.adult_whole-fly_site-specific-recombination_insertion:FBgn0037634	ENCSR335WXQ	hng2	FBgn0037634	adult	adult	whole-fly	NA	adult.whole-fly	whole-fly,site-specific-recombination,insertion	remap2022_ENCSR335WXQ.hng2.adult_whole-fly_site-specific-recombination_insertion:FBgn0037634_ENCFF351GKJ,remap2022_ENCSR335WXQ.hng2.adult_whole-fly_site-specific-recombination_insertion:FBgn0037634_ENCFF698EJP
ENCSR336HCG.CG30431.adult_whole-fly_site-specific-recombination_insertion:FBgn0050431	ENCSR336HCG	CG30431	FBgn0050431	adult	adult	whole-fly	NA	adult.whole-fly	whole-fly,site-specific-recombination,insertion	remap2022_ENCSR336HCG.CG30431.adult_whole-fly_site-specific-recombination_insertion:FBgn0050431_ENCFF572CLI,remap2022_ENCSR336HCG.CG30431.adult_whole-fly_site-specific-recombination_insertion:FBgn0050431_ENCFF858JXW
ENCSR336ZDD.CG17186.adult_whole-fly_site-specific-recombination_insertion:FBgn0038741	ENCSR336ZDD	CG17186	FBgn0038741	adult	adult	whole-fly	NA	adult.whole-fly	whole-fly,site-specific-recombination,insertion	remap2022_ENCSR336ZDD.CG17186.adult_whole-fly_site-specific-recombination_insertion:FBgn0038741_ENCFF398CTS,remap2022_ENCSR336ZDD.CG17186.adult_whole-fly_site-specific-recombination_insertion:FBgn0038741_ENCFF393DCI,remap2022_ENCSR336ZDD.CG17186.adult_whole-fly_site-specific-recombination_insertion:FBgn0038741_ENCFF848AQW
ENCSR339IEZ.Pdp1.adult_whole-fly_site-specific-recombination_insertion:FBgn0016694	ENCSR339IEZ	Pdp1	FBgn0016694	adult	adult	whole-fly	NA	adult.whole-fly	whole-fly,site-specific-recombination,insertion	remap2022_ENCSR339IEZ.Pdp1.adult_whole-fly_site-specific-recombination_insertion:FBgn0016694_ENCFF303AYX,remap2022_ENCSR339IEZ.Pdp1.adult_whole-fly_site-specific-recombination_insertion:FBgn0016694_ENCFF274OOA,remap2022_ENCSR339IEZ.Pdp1.adult_whole-fly_site-specific-recombination_insertion:FBgn0016694_ENCFF660XJT
ENCSR339ZDU.dpn.adult_whole-fly_site-specific-recombination_insertion:FBgn0010109	ENCSR339ZDU	dpn	FBgn0010109	adult	adult	whole-fly	NA	adult.whole-fly	whole-fly,site-specific-recombination,insertion	remap2022_ENCSR339ZDU.dpn.adult_whole-fly_site-specific-recombination_insertion:FBgn0010109_ENCFF364FZV,remap2022_ENCSR339ZDU.dpn.adult_whole-fly_site-specific-recombination_insertion:FBgn0010109_ENCFF586LFJ,remap2022_ENCSR339ZDU.dpn.adult_whole-fly_site-specific-recombination_insertion:FBgn0010109_ENCFF869PQI
ENCSR340CQF.CG15073.adult_whole-fly_site-specific-recombination_insertion:FBgn0034379	ENCSR340CQF	CG15073	FBgn0034379	adult	adult	whole-fly	NA	adult.whole-fly	whole-fly,site-specific-recombination,insertion	remap2022_ENCSR340CQF.CG15073.adult_whole-fly_site-specific-recombination_insertion:FBgn0034379_ENCFF998SGM,remap2022_ENCSR340CQF.CG15073.adult_whole-fly_site-specific-recombination_insertion:FBgn0034379_ENCFF888KEN
ENCSR342YUI.ash1.adult_whole-fly_site-specific-recombination_insertion:FBgn0005386	ENCSR342YUI	ash1	FBgn0005386	adult	adult	whole-fly	NA	adult.whole-fly	whole-fly,site-specific-recombination,insertion	remap2022_ENCSR342YUI.ash1.adult_whole-fly_site-specific-recombination_insertion:FBgn0005386_ENCFF322HYL,remap2022_ENCSR342YUI.ash1.adult_whole-fly_site-specific-recombination_insertion:FBgn0005386_ENCFF632SSA
ENCSR354KRW.CG14965.adult_whole-fly_site-specific-recombination_insertion:FBgn0035414	ENCSR354KRW	CG14965	FBgn0035414	adult	adult	whole-fly	NA	adult.whole-fly	whole-fly,site-specific-recombination,insertion	remap2022_ENCSR354KRW.CG14965.adult_whole-fly_site-specific-recombination_insertion:FBgn0035414_ENCFF210WVK,remap2022_ENCSR354KRW.CG14965.adult_whole-fly_site-specific-recombination_insertion:FBgn0035414_ENCFF543UKD
ENCSR358XYO.Hr96.adult_whole-fly_site-specific-recombination_insertion:FBgn0015240	ENCSR358XYO	Hr96	FBgn0015240	adult	adult	whole-fly	NA	adult.whole-fly	whole-fly,site-specific-recombination,insertion	remap2022_ENCSR358XYO.Hr96.adult_whole-fly_site-specific-recombination_insertion:FBgn0015240_ENCFF749MJP,remap2022_ENCSR358XYO.Hr96.adult_whole-fly_site-specific-recombination_insertion:FBgn0015240_ENCFF645SLX
ENCSR359ZMS.fu2.adult_whole-fly_site-specific-recombination_insertion:FBgn0029173	ENCSR359ZMS	fu2	FBgn0029173	adult	adult	whole-fly	NA	adult.whole-fly	whole-fly,site-specific-recombination,insertion	remap2022_ENCSR359ZMS.fu2.adult_whole-fly_site-specific-recombination_insertion:FBgn0029173_ENCFF349WXV,remap2022_ENCSR359ZMS.fu2.adult_whole-fly_site-specific-recombination_insertion:FBgn0029173_ENCFF801FQA
ENCSR360ERR.CG33017.adult_whole-fly_site-specific-recombination_insertion:FBgn0053017	ENCSR360ERR	CG33017	FBgn0053017	adult	adult	whole-fly	NA	adult.whole-fly	whole-fly,site-specific-recombination,insertion	remap2022_ENCSR360ERR.CG33017.adult_whole-fly_site-specific-recombination_insertion:FBgn0053017_ENCFF994ZRM,remap2022_ENCSR360ERR.CG33017.adult_whole-fly_site-specific-recombination_insertion:FBgn0053017_ENCFF467CKM
ENCSR360TFL.CG31388.adult_whole-fly_site-specific-recombination_insertion:FBgn0051388	ENCSR360TFL	CG31388	FBgn0051388	adult	adult	whole-fly	NA	adult.whole-fly	whole-fly,site-specific-recombination,insertion	remap2022_ENCSR360TFL.CG31388.adult_whole-fly_site-specific-recombination_insertion:FBgn0051388_ENCFF006EPS,remap2022_ENCSR360TFL.CG31388.adult_whole-fly_site-specific-recombination_insertion:FBgn0051388_ENCFF807GQV
ENCSR360TVA.Su-H.adult_whole-fly:FBgn0004837	ENCSR360TVA	Su-H	FBgn0004837	adult	adult	whole-fly	NA	adult.whole-fly	whole-fly	remap2022_ENCSR360TVA.Su-H.adult_whole-fly:FBgn0004837_ENCFF216XYW,remap2022_ENCSR360TVA.Su-H.adult_whole-fly:FBgn0004837_ENCFF791YPZ,remap2022_ENCSR360TVA.Su-H.adult_whole-fly:FBgn0004837_ENCFF624QFY
ENCSR360YKV.cnc.adult_whole-fly_site-specific-recombination_insertion:FBgn0262975	ENCSR360YKV	cnc	FBgn0262975	adult	adult	whole-fly	NA	adult.whole-fly	whole-fly,site-specific-recombination,insertion	remap2022_ENCSR360YKV.cnc.adult_whole-fly_site-specific-recombination_insertion:FBgn0262975_ENCFF513JIZ,remap2022_ENCSR360YKV.cnc.adult_whole-fly_site-specific-recombination_insertion:FBgn0262975_ENCFF546AGE
ENCSR363SHZ.Met.adult_whole-fly_site-specific-recombination_insertion:FBgn0002723	ENCSR363SHZ	Met	FBgn0002723	adult	adult	whole-fly	NA	adult.whole-fly	whole-fly,site-specific-recombination,insertion	remap2022_ENCSR363SHZ.Met.adult_whole-fly_site-specific-recombination_insertion:FBgn0002723_ENCFF860DCW,remap2022_ENCSR363SHZ.Met.adult_whole-fly_site-specific-recombination_insertion:FBgn0002723_ENCFF476LHE,remap2022_ENCSR363SHZ.Met.adult_whole-fly_site-specific-recombination_insertion:FBgn0002723_ENCFF622PGO
ENCSR365BOA.E-spl-m8-HLH.adult_whole-fly_site-specific-recombination_insertion:FBgn0000591	ENCSR365BOA	E-spl-m8-HLH	FBgn0000591	adult	adult	whole-fly	NA	adult.whole-fly	whole-fly,site-specific-recombination,insertion	remap2022_ENCSR365BOA.E-spl-m8-HLH.adult_whole-fly_site-specific-recombination_insertion:FBgn0000591_ENCFF890YZQ,remap2022_ENCSR365BOA.E-spl-m8-HLH.adult_whole-fly_site-specific-recombination_insertion:FBgn0000591_ENCFF712BCZ
ENCSR365IMJ.dmrt11E.adult_whole-fly_site-specific-recombination_insertion:FBgn0030477	ENCSR365IMJ	dmrt11E	FBgn0030477	adult	adult	whole-fly	NA	adult.whole-fly	whole-fly,site-specific-recombination,insertion	remap2022_ENCSR365IMJ.dmrt11E.adult_whole-fly_site-specific-recombination_insertion:FBgn0030477_ENCFF992GNM,remap2022_ENCSR365IMJ.dmrt11E.adult_whole-fly_site-specific-recombination_insertion:FBgn0030477_ENCFF015RNF,remap2022_ENCSR365IMJ.dmrt11E.adult_whole-fly_site-specific-recombination_insertion:FBgn0030477_ENCFF864VIQ,remap2022_ENCSR365IMJ.dmrt11E.adult_whole-fly_site-specific-recombination_i…
ENCSR367SBM.Fer3.adult_whole-fly_site-specific-recombination_insertion:FBgn0037937	ENCSR367SBM	Fer3	FBgn0037937	adult	adult	whole-fly	NA	adult.whole-fly	whole-fly,site-specific-recombination,insertion	remap2022_ENCSR367SBM.Fer3.adult_whole-fly_site-specific-recombination_insertion:FBgn0037937_ENCFF453BPH,remap2022_ENCSR367SBM.Fer3.adult_whole-fly_site-specific-recombination_insertion:FBgn0037937_ENCFF132LJS
ENCSR373BIM.shn.adult_whole-fly_site-specific-recombination_insertion:FBgn0003396	ENCSR373BIM	shn	FBgn0003396	adult	adult	whole-fly	NA	adult.whole-fly	whole-fly,site-specific-recombination,insertion	remap2022_ENCSR373BIM.shn.adult_whole-fly_site-specific-recombination_insertion:FBgn0003396_ENCFF314TWG,remap2022_ENCSR373BIM.shn.adult_whole-fly_site-specific-recombination_insertion:FBgn0003396_ENCFF814EMM,remap2022_ENCSR373BIM.shn.adult_whole-fly_site-specific-recombination_insertion:FBgn0003396_ENCFF107IIN
ENCSR376EUJ.Lpt.adult_whole-fly_insertion:FBgn0263667	ENCSR376EUJ	Lpt	FBgn0263667	adult	adult	whole-fly	NA	adult.whole-fly	whole-fly,insertion	remap2022_ENCSR376EUJ.Lpt.adult_whole-fly_insertion:FBgn0263667_ENCFF173ZFP,remap2022_ENCSR376EUJ.Lpt.adult_whole-fly_insertion:FBgn0263667_ENCFF798KRG
ENCSR377EUZ.EcR.adult_whole-fly_insertion:FBgn0000546	ENCSR377EUZ	EcR	FBgn0000546	adult	adult	whole-fly	NA	adult.whole-fly	whole-fly,insertion	remap2022_ENCSR377EUZ.EcR.adult_whole-fly_insertion:FBgn0000546_ENCFF809JOU,remap2022_ENCSR377EUZ.EcR.adult_whole-fly_insertion:FBgn0000546_ENCFF598SIP,remap2022_ENCSR377EUZ.EcR.adult_whole-fly_insertion:FBgn0000546_ENCFF233VLD
ENCSR378UYF.Blimp-1.adult_whole-fly_site-specific-recombination_insertion:FBgn0035625	ENCSR378UYF	Blimp-1	FBgn0035625	adult	adult	whole-fly	NA	adult.whole-fly	whole-fly,site-specific-recombination,insertion	remap2022_ENCSR378UYF.Blimp-1.adult_whole-fly_site-specific-recombination_insertion:FBgn0035625_ENCFF756HFT,remap2022_ENCSR378UYF.Blimp-1.adult_whole-fly_site-specific-recombination_insertion:FBgn0035625_ENCFF172SUX,remap2022_ENCSR378UYF.Blimp-1.adult_whole-fly_site-specific-recombination_insertion:FBgn0035625_ENCFF774TBO,remap2022_ENCSR378UYF.Blimp-1.adult_whole-fly_site-specific-recombination_i…
ENCSR386BKJ.CG1602.adult_whole-fly_site-specific-recombination_insertion:FBgn0033186	ENCSR386BKJ	CG1602	FBgn0033186	adult	adult	whole-fly	NA	adult.whole-fly	whole-fly,site-specific-recombination,insertion	remap2022_ENCSR386BKJ.CG1602.adult_whole-fly_site-specific-recombination_insertion:FBgn0033186_ENCFF941ZIL,remap2022_ENCSR386BKJ.CG1602.adult_whole-fly_site-specific-recombination_insertion:FBgn0033186_ENCFF827QOU,remap2022_ENCSR386BKJ.CG1602.adult_whole-fly_site-specific-recombination_insertion:FBgn0033186_ENCFF806FYI
ENCSR388YUZ.Jarid2.adult_whole-fly_site-specific-recombination_insertion:FBgn0036004	ENCSR388YUZ	Jarid2	FBgn0036004	adult	adult	whole-fly	NA	adult.whole-fly	whole-fly,site-specific-recombination,insertion	remap2022_ENCSR388YUZ.Jarid2.adult_whole-fly_site-specific-recombination_insertion:FBgn0036004_ENCFF090YBK,remap2022_ENCSR388YUZ.Jarid2.adult_whole-fly_site-specific-recombination_insertion:FBgn0036004_ENCFF064HTW,remap2022_ENCSR388YUZ.Jarid2.adult_whole-fly_site-specific-recombination_insertion:FBgn0036004_ENCFF649NYX
ENCSR390QUD.sima.adult_whole-fly_site-specific-recombination_insertion:FBgn0266411	ENCSR390QUD	sima	FBgn0266411	adult	adult	whole-fly	NA	adult.whole-fly	whole-fly,site-specific-recombination,insertion	remap2022_ENCSR390QUD.sima.adult_whole-fly_site-specific-recombination_insertion:FBgn0266411_ENCFF048IYN,remap2022_ENCSR390QUD.sima.adult_whole-fly_site-specific-recombination_insertion:FBgn0266411_ENCFF309ZFF
ENCSR392ANZ.lbe.adult_whole-fly_site-specific-recombination_insertion:FBgn0011278	ENCSR392ANZ	lbe	FBgn0011278	adult	adult	whole-fly	NA	adult.whole-fly	whole-fly,site-specific-recombination,insertion	remap2022_ENCSR392ANZ.lbe.adult_whole-fly_site-specific-recombination_insertion:FBgn0011278_ENCFF493EIH,remap2022_ENCSR392ANZ.lbe.adult_whole-fly_site-specific-recombination_insertion:FBgn0011278_ENCFF824QGM
ENCSR392IEL.run.adult_whole-fly_site-specific-recombination_insertion:FBgn0003300	ENCSR392IEL	run	FBgn0003300	adult	adult	whole-fly	NA	adult.whole-fly	whole-fly,site-specific-recombination,insertion	remap2022_ENCSR392IEL.run.adult_whole-fly_site-specific-recombination_insertion:FBgn0003300_ENCFF442TBB,remap2022_ENCSR392IEL.run.adult_whole-fly_site-specific-recombination_insertion:FBgn0003300_ENCFF812BYM,remap2022_ENCSR392IEL.run.adult_whole-fly_site-specific-recombination_insertion:FBgn0003300_ENCFF911SDE
ENCSR393AKW.Myb.adult_whole-fly_site-specific-recombination_insertion:FBgn0002914	ENCSR393AKW	Myb	FBgn0002914	adult	adult	whole-fly	NA	adult.whole-fly	whole-fly,site-specific-recombination,insertion	remap2022_ENCSR393AKW.Myb.adult_whole-fly_site-specific-recombination_insertion:FBgn0002914_ENCFF974HGW,remap2022_ENCSR393AKW.Myb.adult_whole-fly_site-specific-recombination_insertion:FBgn0002914_ENCFF864OUL
ENCSR393QBI.BtbVII.adult_whole-fly_site-specific-recombination_insertion:FBgn0263108	ENCSR393QBI	BtbVII	FBgn0263108	adult	adult	whole-fly	NA	adult.whole-fly	whole-fly,site-specific-recombination,insertion	remap2022_ENCSR393QBI.BtbVII.adult_whole-fly_site-specific-recombination_insertion:FBgn0263108_ENCFF567BJU,remap2022_ENCSR393QBI.BtbVII.adult_whole-fly_site-specific-recombination_insertion:FBgn0263108_ENCFF127TWR,remap2022_ENCSR393QBI.BtbVII.adult_whole-fly_site-specific-recombination_insertion:FBgn0263108_ENCFF248ZAF,remap2022_ENCSR393QBI.BtbVII.adult_whole-fly_site-specific-recombination_inser…
ENCSR393VQP.Zif.adult_whole-fly_site-specific-recombination_insertion:FBgn0037446	ENCSR393VQP	Zif	FBgn0037446	adult	adult	whole-fly	NA	adult.whole-fly	whole-fly,site-specific-recombination,insertion	remap2022_ENCSR393VQP.Zif.adult_whole-fly_site-specific-recombination_insertion:FBgn0037446_ENCFF605EVZ,remap2022_ENCSR393VQP.Zif.adult_whole-fly_site-specific-recombination_insertion:FBgn0037446_ENCFF562CHB,remap2022_ENCSR393VQP.Zif.adult_whole-fly_site-specific-recombination_insertion:FBgn0037446_ENCFF245IPH
ENCSR394MHV.unpg.adult_whole-fly_site-specific-recombination_insertion:FBgn0015561	ENCSR394MHV	unpg	FBgn0015561	adult	adult	whole-fly	NA	adult.whole-fly	whole-fly,site-specific-recombination,insertion	remap2022_ENCSR394MHV.unpg.adult_whole-fly_site-specific-recombination_insertion:FBgn0015561_ENCFF556SDP,remap2022_ENCSR394MHV.unpg.adult_whole-fly_site-specific-recombination_insertion:FBgn0015561_ENCFF407UWD,remap2022_ENCSR394MHV.unpg.adult_whole-fly_site-specific-recombination_insertion:FBgn0015561_ENCFF085HVK,remap2022_ENCSR394MHV.unpg.adult_whole-fly_site-specific-recombination_insertion:FBg…
ENCSR396LMJ.YL-1.adult_whole-fly_site-specific-recombination_insertion:FBgn0032321	ENCSR396LMJ	YL-1	FBgn0032321	adult	adult	whole-fly	NA	adult.whole-fly	whole-fly,site-specific-recombination,insertion	remap2022_ENCSR396LMJ.YL-1.adult_whole-fly_site-specific-recombination_insertion:FBgn0032321_ENCFF611DBI,remap2022_ENCSR396LMJ.YL-1.adult_whole-fly_site-specific-recombination_insertion:FBgn0032321_ENCFF024WNV,remap2022_ENCSR396LMJ.YL-1.adult_whole-fly_site-specific-recombination_insertion:FBgn0032321_ENCFF577AFL
ENCSR399DAW.net.adult_whole-fly_site-specific-recombination_insertion:FBgn0002931	ENCSR399DAW	net	FBgn0002931	adult	adult	whole-fly	NA	adult.whole-fly	whole-fly,site-specific-recombination,insertion	remap2022_ENCSR399DAW.net.adult_whole-fly_site-specific-recombination_insertion:FBgn0002931_ENCFF155CWC,remap2022_ENCSR399DAW.net.adult_whole-fly_site-specific-recombination_insertion:FBgn0002931_ENCFF178IAW,remap2022_ENCSR399DAW.net.adult_whole-fly_site-specific-recombination_insertion:FBgn0002931_ENCFF692QXK
ENCSR399FPR.ZIPIC.adult_whole-fly_site-specific-recombination_insertion:FBgn0039740	ENCSR399FPR	ZIPIC	FBgn0039740	adult	adult	whole-fly	NA	adult.whole-fly	whole-fly,site-specific-recombination,insertion	remap2022_ENCSR399FPR.ZIPIC.adult_whole-fly_site-specific-recombination_insertion:FBgn0039740_ENCFF501YME,remap2022_ENCSR399FPR.ZIPIC.adult_whole-fly_site-specific-recombination_insertion:FBgn0039740_ENCFF096KIN
ENCSR407MOM.gcm2.adult_whole-fly_site-specific-recombination_insertion:FBgn0019809	ENCSR407MOM	gcm2	FBgn0019809	adult	adult	whole-fly	NA	adult.whole-fly	whole-fly,site-specific-recombination,insertion	remap2022_ENCSR407MOM.gcm2.adult_whole-fly_site-specific-recombination_insertion:FBgn0019809_ENCFF296SYF,remap2022_ENCSR407MOM.gcm2.adult_whole-fly_site-specific-recombination_insertion:FBgn0019809_ENCFF446FYT
ENCSR410UOB.Eip75B.adult_whole-fly_site-specific-recombination_insertion:FBgn0000568	ENCSR410UOB	Eip75B	FBgn0000568	adult	adult	whole-fly	NA	adult.whole-fly	whole-fly,site-specific-recombination,insertion	remap2022_ENCSR410UOB.Eip75B.adult_whole-fly_site-specific-recombination_insertion:FBgn0000568_ENCFF925RSO,remap2022_ENCSR410UOB.Eip75B.adult_whole-fly_site-specific-recombination_insertion:FBgn0000568_ENCFF808OHA,remap2022_ENCSR410UOB.Eip75B.adult_whole-fly_site-specific-recombination_insertion:FBgn0000568_ENCFF432YTP
ENCSR414EAT.gsb-n.adult_whole-fly_site-specific-recombination_insertion:FBgn0001147	ENCSR414EAT	gsb-n	FBgn0001147	adult	adult	whole-fly	NA	adult.whole-fly	whole-fly,site-specific-recombination,insertion	remap2022_ENCSR414EAT.gsb-n.adult_whole-fly_site-specific-recombination_insertion:FBgn0001147_ENCFF340QBB,remap2022_ENCSR414EAT.gsb-n.adult_whole-fly_site-specific-recombination_insertion:FBgn0001147_ENCFF048VEK,remap2022_ENCSR414EAT.gsb-n.adult_whole-fly_site-specific-recombination_insertion:FBgn0001147_ENCFF374ILG
ENCSR415SZP.sc.adult_whole-fly:FBgn0004170	ENCSR415SZP	sc	FBgn0004170	adult	adult	whole-fly	NA	adult.whole-fly	whole-fly	remap2022_ENCSR415SZP.sc.adult_whole-fly:FBgn0004170_ENCFF170ACR,remap2022_ENCSR415SZP.sc.adult_whole-fly:FBgn0004170_ENCFF372FJU
ENCSR416MJQ.da.adult_whole-fly_site-specific-recombination_insertion:FBgn0267821	ENCSR416MJQ	da	FBgn0267821	adult	adult	whole-fly	NA	adult.whole-fly	whole-fly,site-specific-recombination,insertion	remap2022_ENCSR416MJQ.da.adult_whole-fly_site-specific-recombination_insertion:FBgn0267821_ENCFF303EVV,remap2022_ENCSR416MJQ.da.adult_whole-fly_site-specific-recombination_insertion:FBgn0267821_ENCFF831FKP
ENCSR418NNG.Hey.adult_whole-fly_site-specific-recombination_insertion:FBgn0027788	ENCSR418NNG	Hey	FBgn0027788	adult	adult	whole-fly	NA	adult.whole-fly	whole-fly,site-specific-recombination,insertion	remap2022_ENCSR418NNG.Hey.adult_whole-fly_site-specific-recombination_insertion:FBgn0027788_ENCFF538JKZ,remap2022_ENCSR418NNG.Hey.adult_whole-fly_site-specific-recombination_insertion:FBgn0027788_ENCFF536AMH,remap2022_ENCSR418NNG.Hey.adult_whole-fly_site-specific-recombination_insertion:FBgn0027788_ENCFF363PXU
ENCSR418YJE.CG3919.adult_whole-fly_site-specific-recombination_insertion:FBgn0036423	ENCSR418YJE	CG3919	FBgn0036423	adult	adult	whole-fly	NA	adult.whole-fly	whole-fly,site-specific-recombination,insertion	remap2022_ENCSR418YJE.CG3919.adult_whole-fly_site-specific-recombination_insertion:FBgn0036423_ENCFF200UEG,remap2022_ENCSR418YJE.CG3919.adult_whole-fly_site-specific-recombination_insertion:FBgn0036423_ENCFF888HJT,remap2022_ENCSR418YJE.CG3919.adult_whole-fly_site-specific-recombination_insertion:FBgn0036423_ENCFF274QQU,remap2022_ENCSR418YJE.CG3919.adult_whole-fly_site-specific-recombination_inser…
ENCSR420PGU.Su-var-205.adult_whole-fly:FBgn0003607	ENCSR420PGU	Su-var-205	FBgn0003607	adult	adult	whole-fly	NA	adult.whole-fly	whole-fly	remap2022_ENCSR420PGU.Su-var-205.adult_whole-fly:FBgn0003607_ENCFF737WCX,remap2022_ENCSR420PGU.Su-var-205.adult_whole-fly:FBgn0003607_ENCFF943TGN
ENCSR421ILX.CG10274.adult_whole-fly_site-specific-recombination_insertion:FBgn0035690	ENCSR421ILX	CG10274	FBgn0035690	adult	adult	whole-fly	NA	adult.whole-fly	whole-fly,site-specific-recombination,insertion	remap2022_ENCSR421ILX.CG10274.adult_whole-fly_site-specific-recombination_insertion:FBgn0035690_ENCFF258UPN,remap2022_ENCSR421ILX.CG10274.adult_whole-fly_site-specific-recombination_insertion:FBgn0035690_ENCFF454MVU,remap2022_ENCSR421ILX.CG10274.adult_whole-fly_site-specific-recombination_insertion:FBgn0035690_ENCFF718JID
ENCSR422OTX.yki.adult_whole-fly:FBgn0034970	ENCSR422OTX	yki	FBgn0034970	adult	adult	whole-fly	NA	adult.whole-fly	whole-fly	remap2022_ENCSR422OTX.yki.adult_whole-fly:FBgn0034970_ENCFF431HES,remap2022_ENCSR422OTX.yki.adult_whole-fly:FBgn0034970_ENCFF695EWD,remap2022_ENCSR422OTX.yki.adult_whole-fly:FBgn0034970_ENCFF862SCY
ENCSR422PMR.CG33213.adult_whole-fly_site-specific-recombination_insertion:FBgn0053213	ENCSR422PMR	CG33213	FBgn0053213	adult	adult	whole-fly	NA	adult.whole-fly	whole-fly,site-specific-recombination,insertion	remap2022_ENCSR422PMR.CG33213.adult_whole-fly_site-specific-recombination_insertion:FBgn0053213_ENCFF015VHB,remap2022_ENCSR422PMR.CG33213.adult_whole-fly_site-specific-recombination_insertion:FBgn0053213_ENCFF180ZOG,remap2022_ENCSR422PMR.CG33213.adult_whole-fly_site-specific-recombination_insertion:FBgn0053213_ENCFF181HIO
ENCSR423GBK.FoxP.adult_whole-fly_site-specific-recombination_insertion:FBgn0262477	ENCSR423GBK	FoxP	FBgn0262477	adult	adult	whole-fly	NA	adult.whole-fly	whole-fly,site-specific-recombination,insertion	remap2022_ENCSR423GBK.FoxP.adult_whole-fly_site-specific-recombination_insertion:FBgn0262477_ENCFF043OZD,remap2022_ENCSR423GBK.FoxP.adult_whole-fly_site-specific-recombination_insertion:FBgn0262477_ENCFF398IOP,remap2022_ENCSR423GBK.FoxP.adult_whole-fly_site-specific-recombination_insertion:FBgn0262477_ENCFF776STI
ENCSR423NEB.CG14710.adult_whole-fly_site-specific-recombination_insertion:FBgn0037920	ENCSR423NEB	CG14710	FBgn0037920	adult	adult	whole-fly	NA	adult.whole-fly	whole-fly,site-specific-recombination,insertion	remap2022_ENCSR423NEB.CG14710.adult_whole-fly_site-specific-recombination_insertion:FBgn0037920_ENCFF955CIR,remap2022_ENCSR423NEB.CG14710.adult_whole-fly_site-specific-recombination_insertion:FBgn0037920_ENCFF532ZLP,remap2022_ENCSR423NEB.CG14710.adult_whole-fly_site-specific-recombination_insertion:FBgn0037920_ENCFF464OLC
ENCSR425SCD.HmgD.adult_whole-fly_site-specific-recombination_insertion:FBgn0004362	ENCSR425SCD	HmgD	FBgn0004362	adult	adult	whole-fly	NA	adult.whole-fly	whole-fly,site-specific-recombination,insertion	remap2022_ENCSR425SCD.HmgD.adult_whole-fly_site-specific-recombination_insertion:FBgn0004362_ENCFF940BMT,remap2022_ENCSR425SCD.HmgD.adult_whole-fly_site-specific-recombination_insertion:FBgn0004362_ENCFF725XPS,remap2022_ENCSR425SCD.HmgD.adult_whole-fly_site-specific-recombination_insertion:FBgn0004362_ENCFF376BZK
ENCSR443MIN.tai.adult_whole-fly_site-specific-recombination_insertion:FBgn0041092	ENCSR443MIN	tai	FBgn0041092	adult	adult	whole-fly	NA	adult.whole-fly	whole-fly,site-specific-recombination,insertion	remap2022_ENCSR443MIN.tai.adult_whole-fly_site-specific-recombination_insertion:FBgn0041092_ENCFF966JOO,remap2022_ENCSR443MIN.tai.adult_whole-fly_site-specific-recombination_insertion:FBgn0041092_ENCFF706OGR,remap2022_ENCSR443MIN.tai.adult_whole-fly_site-specific-recombination_insertion:FBgn0041092_ENCFF499LQM
ENCSR443NTZ.CG2712.adult_whole-fly_site-specific-recombination_insertion:FBgn0024975	ENCSR443NTZ	CG2712	FBgn0024975	adult	adult	whole-fly	NA	adult.whole-fly	whole-fly,site-specific-recombination,insertion	remap2022_ENCSR443NTZ.CG2712.adult_whole-fly_site-specific-recombination_insertion:FBgn0024975_ENCFF105GZO,remap2022_ENCSR443NTZ.CG2712.adult_whole-fly_site-specific-recombination_insertion:FBgn0024975_ENCFF095GOH,remap2022_ENCSR443NTZ.CG2712.adult_whole-fly_site-specific-recombination_insertion:FBgn0024975_ENCFF425TUT
ENCSR444JKK.ewg.adult_whole-fly_site-specific-recombination_insertion:FBgn0005427	ENCSR444JKK	ewg	FBgn0005427	adult	adult	whole-fly	NA	adult.whole-fly	whole-fly,site-specific-recombination,insertion	remap2022_ENCSR444JKK.ewg.adult_whole-fly_site-specific-recombination_insertion:FBgn0005427_ENCFF256XPQ,remap2022_ENCSR444JKK.ewg.adult_whole-fly_site-specific-recombination_insertion:FBgn0005427_ENCFF317AVH,remap2022_ENCSR444JKK.ewg.adult_whole-fly_site-specific-recombination_insertion:FBgn0005427_ENCFF534WXU
ENCSR445WCZ.psq.adult_whole-fly_site-specific-recombination_insertion:FBgn0263102	ENCSR445WCZ	psq	FBgn0263102	adult	adult	whole-fly	NA	adult.whole-fly	whole-fly,site-specific-recombination,insertion	remap2022_ENCSR445WCZ.psq.adult_whole-fly_site-specific-recombination_insertion:FBgn0263102_ENCFF591MIW,remap2022_ENCSR445WCZ.psq.adult_whole-fly_site-specific-recombination_insertion:FBgn0263102_ENCFF781QEI
ENCSR450HPD.bsh.adult_whole-fly_site-specific-recombination_insertion:FBgn0000529	ENCSR450HPD	bsh	FBgn0000529	adult	adult	whole-fly	NA	adult.whole-fly	whole-fly,site-specific-recombination,insertion	remap2022_ENCSR450HPD.bsh.adult_whole-fly_site-specific-recombination_insertion:FBgn0000529_ENCFF033NDG,remap2022_ENCSR450HPD.bsh.adult_whole-fly_site-specific-recombination_insertion:FBgn0000529_ENCFF553ZPQ
ENCSR450VJF.CG10543.adult_whole-fly_site-specific-recombination_insertion:FBgn0034570	ENCSR450VJF	CG10543	FBgn0034570	adult	adult	whole-fly	NA	adult.whole-fly	whole-fly,site-specific-recombination,insertion	remap2022_ENCSR450VJF.CG10543.adult_whole-fly_site-specific-recombination_insertion:FBgn0034570_ENCFF445UGJ,remap2022_ENCSR450VJF.CG10543.adult_whole-fly_site-specific-recombination_insertion:FBgn0034570_ENCFF520NQT,remap2022_ENCSR450VJF.CG10543.adult_whole-fly_site-specific-recombination_insertion:FBgn0034570_ENCFF525MLO
ENCSR453UOF.Pif1B.adult_whole-fly_site-specific-recombination_insertion:FBgn0046874	ENCSR453UOF	Pif1B	FBgn0046874	adult	adult	whole-fly	NA	adult.whole-fly	whole-fly,site-specific-recombination,insertion	remap2022_ENCSR453UOF.Pif1B.adult_whole-fly_site-specific-recombination_insertion:FBgn0046874_ENCFF217ZLS,remap2022_ENCSR453UOF.Pif1B.adult_whole-fly_site-specific-recombination_insertion:FBgn0046874_ENCFF591XML,remap2022_ENCSR453UOF.Pif1B.adult_whole-fly_site-specific-recombination_insertion:FBgn0046874_ENCFF038HBU
ENCSR455AWG.pan.adult_whole-fly:FBgn0085432	ENCSR455AWG	pan	FBgn0085432	adult	adult	whole-fly	NA	adult.whole-fly	whole-fly	remap2022_ENCSR455AWG.pan.adult_whole-fly:FBgn0085432_ENCFF155QUD,remap2022_ENCSR455AWG.pan.adult_whole-fly:FBgn0085432_ENCFF572XEZ,remap2022_ENCSR455AWG.pan.adult_whole-fly:FBgn0085432_ENCFF520OCZ
ENCSR456UZW.CG2116.adult_whole-fly_site-specific-recombination_insertion:FBgn0030003	ENCSR456UZW	CG2116	FBgn0030003	adult	adult	whole-fly	NA	adult.whole-fly	whole-fly,site-specific-recombination,insertion	remap2022_ENCSR456UZW.CG2116.adult_whole-fly_site-specific-recombination_insertion:FBgn0030003_ENCFF386FSE,remap2022_ENCSR456UZW.CG2116.adult_whole-fly_site-specific-recombination_insertion:FBgn0030003_ENCFF678UNA,remap2022_ENCSR456UZW.CG2116.adult_whole-fly_site-specific-recombination_insertion:FBgn0030003_ENCFF826DND
ENCSR459CZO.CG4328.adult_whole-fly_site-specific-recombination_insertion:FBgn0036274	ENCSR459CZO	CG4328	FBgn0036274	adult	adult	whole-fly	NA	adult.whole-fly	whole-fly,site-specific-recombination,insertion	remap2022_ENCSR459CZO.CG4328.adult_whole-fly_site-specific-recombination_insertion:FBgn0036274_ENCFF036MQP,remap2022_ENCSR459CZO.CG4328.adult_whole-fly_site-specific-recombination_insertion:FBgn0036274_ENCFF930LCH,remap2022_ENCSR459CZO.CG4328.adult_whole-fly_site-specific-recombination_insertion:FBgn0036274_ENCFF949AKD
ENCSR460LRT.REPTOR.adult_whole-fly_site-specific-recombination_insertion:FBgn0039209	ENCSR460LRT	REPTOR	FBgn0039209	adult	adult	whole-fly	NA	adult.whole-fly	whole-fly,site-specific-recombination,insertion	remap2022_ENCSR460LRT.REPTOR.adult_whole-fly_site-specific-recombination_insertion:FBgn0039209_ENCFF028OWL,remap2022_ENCSR460LRT.REPTOR.adult_whole-fly_site-specific-recombination_insertion:FBgn0039209_ENCFF254CRJ
ENCSR461AXL.h.adult_whole-fly_site-specific-recombination_insertion:FBgn0001168	ENCSR461AXL	h	FBgn0001168	adult	adult	whole-fly	NA	adult.whole-fly	whole-fly,site-specific-recombination,insertion	remap2022_ENCSR461AXL.h.adult_whole-fly_site-specific-recombination_insertion:FBgn0001168_ENCFF630GEQ,remap2022_ENCSR461AXL.h.adult_whole-fly_site-specific-recombination_insertion:FBgn0001168_ENCFF827MQB,remap2022_ENCSR461AXL.h.adult_whole-fly_site-specific-recombination_insertion:FBgn0001168_ENCFF617LGV
ENCSR465HPZ.Abd-B.adult_whole-fly_site-specific-recombination_insertion:FBgn0000015	ENCSR465HPZ	Abd-B	FBgn0000015	adult	adult	whole-fly	NA	adult.whole-fly	whole-fly,site-specific-recombination,insertion	remap2022_ENCSR465HPZ.Abd-B.adult_whole-fly_site-specific-recombination_insertion:FBgn0000015_ENCFF969SEG,remap2022_ENCSR465HPZ.Abd-B.adult_whole-fly_site-specific-recombination_insertion:FBgn0000015_ENCFF469WCT
ENCSR469KTM.gem.adult_whole-fly_site-specific-recombination_insertion:FBgn0050011	ENCSR469KTM	gem	FBgn0050011	adult	adult	whole-fly	NA	adult.whole-fly	whole-fly,site-specific-recombination,insertion	remap2022_ENCSR469KTM.gem.adult_whole-fly_site-specific-recombination_insertion:FBgn0050011_ENCFF294RYL,remap2022_ENCSR469KTM.gem.adult_whole-fly_site-specific-recombination_insertion:FBgn0050011_ENCFF781SQT
ENCSR471GSA.Jra.adult_whole-fly_site-specific-recombination_insertion:FBgn0001291	ENCSR471GSA	Jra	FBgn0001291	adult	adult	whole-fly	NA	adult.whole-fly	whole-fly,site-specific-recombination,insertion	remap2022_ENCSR471GSA.Jra.adult_whole-fly_site-specific-recombination_insertion:FBgn0001291_ENCFF298AHP,remap2022_ENCSR471GSA.Jra.adult_whole-fly_site-specific-recombination_insertion:FBgn0001291_ENCFF888CHA
ENCSR471YQA.Eip78C.adult_whole-fly_site-specific-recombination_insertion:FBgn0004865	ENCSR471YQA	Eip78C	FBgn0004865	adult	adult	whole-fly	NA	adult.whole-fly	whole-fly,site-specific-recombination,insertion	remap2022_ENCSR471YQA.Eip78C.adult_whole-fly_site-specific-recombination_insertion:FBgn0004865_ENCFF629AOU,remap2022_ENCSR471YQA.Eip78C.adult_whole-fly_site-specific-recombination_insertion:FBgn0004865_ENCFF385CWJ,remap2022_ENCSR471YQA.Eip78C.adult_whole-fly_site-specific-recombination_insertion:FBgn0004865_ENCFF522EPU,remap2022_ENCSR471YQA.Eip78C.adult_whole-fly_site-specific-recombination_inser…
ENCSR472URU.gl.adult_whole-fly_site-specific-recombination_insertion:FBgn0004618	ENCSR472URU	gl	FBgn0004618	adult	adult	whole-fly	NA	adult.whole-fly	whole-fly,site-specific-recombination,insertion	remap2022_ENCSR472URU.gl.adult_whole-fly_site-specific-recombination_insertion:FBgn0004618_ENCFF571PYK,remap2022_ENCSR472URU.gl.adult_whole-fly_site-specific-recombination_insertion:FBgn0004618_ENCFF493QOA
ENCSR476LOS.Med.adult_whole-fly_site-specific-recombination_insertion:FBgn0011655	ENCSR476LOS	Med	FBgn0011655	adult	adult	whole-fly	NA	adult.whole-fly	whole-fly,site-specific-recombination,insertion	remap2022_ENCSR476LOS.Med.adult_whole-fly_site-specific-recombination_insertion:FBgn0011655_ENCFF715HMJ,remap2022_ENCSR476LOS.Med.adult_whole-fly_site-specific-recombination_insertion:FBgn0011655_ENCFF169VLN,remap2022_ENCSR476LOS.Med.adult_whole-fly_site-specific-recombination_insertion:FBgn0011655_ENCFF400LQU,remap2022_ENCSR476LOS.Med.adult_whole-fly_site-specific-recombination_insertion:FBgn001…
ENCSR476TPB.CG13204.adult_whole-fly_site-specific-recombination_insertion:FBgn0033627	ENCSR476TPB	CG13204	FBgn0033627	adult	adult	whole-fly	NA	adult.whole-fly	whole-fly,site-specific-recombination,insertion	remap2022_ENCSR476TPB.CG13204.adult_whole-fly_site-specific-recombination_insertion:FBgn0033627_ENCFF738THS,remap2022_ENCSR476TPB.CG13204.adult_whole-fly_site-specific-recombination_insertion:FBgn0033627_ENCFF415ILY
ENCSR483VVZ.CG12391.adult_whole-fly_site-specific-recombination_insertion:FBgn0033581	ENCSR483VVZ	CG12391	FBgn0033581	adult	adult	whole-fly	NA	adult.whole-fly	whole-fly,site-specific-recombination,insertion	remap2022_ENCSR483VVZ.CG12391.adult_whole-fly_site-specific-recombination_insertion:FBgn0033581_ENCFF722UGU,remap2022_ENCSR483VVZ.CG12391.adult_whole-fly_site-specific-recombination_insertion:FBgn0033581_ENCFF098BKE,remap2022_ENCSR483VVZ.CG12391.adult_whole-fly_site-specific-recombination_insertion:FBgn0033581_ENCFF244JIN
ENCSR484YRI.dl.adult_whole-fly_site-specific-recombination_insertion:FBgn0260632	ENCSR484YRI	dl	FBgn0260632	adult	adult	whole-fly	NA	adult.whole-fly	whole-fly,site-specific-recombination,insertion	remap2022_ENCSR484YRI.dl.adult_whole-fly_site-specific-recombination_insertion:FBgn0260632_ENCFF261RMY,remap2022_ENCSR484YRI.dl.adult_whole-fly_site-specific-recombination_insertion:FBgn0260632_ENCFF717BTC
ENCSR484ZCC.CG15269.adult_whole-fly_site-specific-recombination_insertion:FBgn0028878	ENCSR484ZCC	CG15269	FBgn0028878	adult	adult	whole-fly	NA	adult.whole-fly	whole-fly,site-specific-recombination,insertion	remap2022_ENCSR484ZCC.CG15269.adult_whole-fly_site-specific-recombination_insertion:FBgn0028878_ENCFF655URT,remap2022_ENCSR484ZCC.CG15269.adult_whole-fly_site-specific-recombination_insertion:FBgn0028878_ENCFF216ITG
ENCSR485SST.Ets97D.adult_whole-fly_site-specific-recombination_insertion:FBgn0004510	ENCSR485SST	Ets97D	FBgn0004510	adult	adult	whole-fly	NA	adult.whole-fly	whole-fly,site-specific-recombination,insertion	remap2022_ENCSR485SST.Ets97D.adult_whole-fly_site-specific-recombination_insertion:FBgn0004510_ENCFF319NEI,remap2022_ENCSR485SST.Ets97D.adult_whole-fly_site-specific-recombination_insertion:FBgn0004510_ENCFF904XNK,remap2022_ENCSR485SST.Ets97D.adult_whole-fly_site-specific-recombination_insertion:FBgn0004510_ENCFF126QIM
ENCSR485XWP.CG1529.adult_whole-fly_site-specific-recombination_insertion:FBgn0031144	ENCSR485XWP	CG1529	FBgn0031144	adult	adult	whole-fly	NA	adult.whole-fly	whole-fly,site-specific-recombination,insertion	remap2022_ENCSR485XWP.CG1529.adult_whole-fly_site-specific-recombination_insertion:FBgn0031144_ENCFF846BNL,remap2022_ENCSR485XWP.CG1529.adult_whole-fly_site-specific-recombination_insertion:FBgn0031144_ENCFF863BWM,remap2022_ENCSR485XWP.CG1529.adult_whole-fly_site-specific-recombination_insertion:FBgn0031144_ENCFF547WLI
ENCSR486EPD.ind.adult_whole-fly_site-specific-recombination_insertion:FBgn0025776	ENCSR486EPD	ind	FBgn0025776	adult	adult	whole-fly	NA	adult.whole-fly	whole-fly,site-specific-recombination,insertion	remap2022_ENCSR486EPD.ind.adult_whole-fly_site-specific-recombination_insertion:FBgn0025776_ENCFF664KFL,remap2022_ENCSR486EPD.ind.adult_whole-fly_site-specific-recombination_insertion:FBgn0025776_ENCFF751WZN,remap2022_ENCSR486EPD.ind.adult_whole-fly_site-specific-recombination_insertion:FBgn0025776_ENCFF590EEI
ENCSR486EQS.org-1.adult_whole-fly_site-specific-recombination_insertion:FBgn0021767	ENCSR486EQS	org-1	FBgn0021767	adult	adult	whole-fly	NA	adult.whole-fly	whole-fly,site-specific-recombination,insertion	remap2022_ENCSR486EQS.org-1.adult_whole-fly_site-specific-recombination_insertion:FBgn0021767_ENCFF382IWA,remap2022_ENCSR486EQS.org-1.adult_whole-fly_site-specific-recombination_insertion:FBgn0021767_ENCFF029MCW
ENCSR486MQI.CG11398.adult_whole-fly_site-specific-recombination_insertion:FBgn0040366	ENCSR486MQI	CG11398	FBgn0040366	adult	adult	whole-fly	NA	adult.whole-fly	whole-fly,site-specific-recombination,insertion	remap2022_ENCSR486MQI.CG11398.adult_whole-fly_site-specific-recombination_insertion:FBgn0040366_ENCFF739YSW,remap2022_ENCSR486MQI.CG11398.adult_whole-fly_site-specific-recombination_insertion:FBgn0040366_ENCFF813BAF
ENCSR488NXW.lov.adult_whole-fly:FBgn0266129	ENCSR488NXW	lov	FBgn0266129	adult	adult	whole-fly	NA	adult.whole-fly	whole-fly	remap2022_ENCSR488NXW.lov.adult_whole-fly:FBgn0266129_ENCFF880MKO,remap2022_ENCSR488NXW.lov.adult_whole-fly:FBgn0266129_ENCFF435MOI
ENCSR492FKR.Blimp-1.adult_whole-fly_site-specific-recombination_insertion:FBgn0035625	ENCSR492FKR	Blimp-1	FBgn0035625	adult	adult	whole-fly	NA	adult.whole-fly	whole-fly,site-specific-recombination,insertion	remap2022_ENCSR492FKR.Blimp-1.adult_whole-fly_site-specific-recombination_insertion:FBgn0035625_ENCFF648IVP,remap2022_ENCSR492FKR.Blimp-1.adult_whole-fly_site-specific-recombination_insertion:FBgn0035625_ENCFF734HSX,remap2022_ENCSR492FKR.Blimp-1.adult_whole-fly_site-specific-recombination_insertion:FBgn0035625_ENCFF483KZF
ENCSR492KRE.insv.adult_whole-fly_site-specific-recombination_insertion:FBgn0031434	ENCSR492KRE	insv	FBgn0031434	adult	adult	whole-fly	NA	adult.whole-fly	whole-fly,site-specific-recombination,insertion	remap2022_ENCSR492KRE.insv.adult_whole-fly_site-specific-recombination_insertion:FBgn0031434_ENCFF634EMX,remap2022_ENCSR492KRE.insv.adult_whole-fly_site-specific-recombination_insertion:FBgn0031434_ENCFF657STG,remap2022_ENCSR492KRE.insv.adult_whole-fly_site-specific-recombination_insertion:FBgn0031434_ENCFF490LWN
ENCSR493LWV.Hmx.adult_whole-fly_site-specific-recombination_insertion:FBgn0264005	ENCSR493LWV	Hmx	FBgn0264005	adult	adult	whole-fly	NA	adult.whole-fly	whole-fly,site-specific-recombination,insertion	remap2022_ENCSR493LWV.Hmx.adult_whole-fly_site-specific-recombination_insertion:FBgn0264005_ENCFF179YZD,remap2022_ENCSR493LWV.Hmx.adult_whole-fly_site-specific-recombination_insertion:FBgn0264005_ENCFF311CJT
ENCSR494UZY.Stat92E.adult_whole-fly_insertion:FBgn0016917	ENCSR494UZY	Stat92E	FBgn0016917	adult	adult	whole-fly	NA	adult.whole-fly	whole-fly,insertion	remap2022_ENCSR494UZY.Stat92E.adult_whole-fly_insertion:FBgn0016917_ENCFF199LTY,remap2022_ENCSR494UZY.Stat92E.adult_whole-fly_insertion:FBgn0016917_ENCFF052DLA
ENCSR497FYG.EcR.adult_whole-fly_insertion:FBgn0000546	ENCSR497FYG	EcR	FBgn0000546	adult	adult	whole-fly	NA	adult.whole-fly	whole-fly,insertion	remap2022_ENCSR497FYG.EcR.adult_whole-fly_insertion:FBgn0000546_ENCFF597DCI,remap2022_ENCSR497FYG.EcR.adult_whole-fly_insertion:FBgn0000546_ENCFF235QDC,remap2022_ENCSR497FYG.EcR.adult_whole-fly_insertion:FBgn0000546_ENCFF581DGB
ENCSR498KAT.fd102C.adult_whole-fly_site-specific-recombination_insertion:FBgn0039937	ENCSR498KAT	fd102C	FBgn0039937	adult	adult	whole-fly	NA	adult.whole-fly	whole-fly,site-specific-recombination,insertion	remap2022_ENCSR498KAT.fd102C.adult_whole-fly_site-specific-recombination_insertion:FBgn0039937_ENCFF756UES,remap2022_ENCSR498KAT.fd102C.adult_whole-fly_site-specific-recombination_insertion:FBgn0039937_ENCFF719PXW
ENCSR502JHR.tup.adult_whole-fly_site-specific-recombination_insertion:FBgn0003896	ENCSR502JHR	tup	FBgn0003896	adult	adult	whole-fly	NA	adult.whole-fly	whole-fly,site-specific-recombination,insertion	remap2022_ENCSR502JHR.tup.adult_whole-fly_site-specific-recombination_insertion:FBgn0003896_ENCFF936FOF,remap2022_ENCSR502JHR.tup.adult_whole-fly_site-specific-recombination_insertion:FBgn0003896_ENCFF672ZLH
ENCSR504AYW.Bdp1.adult_whole-fly_site-specific-recombination_insertion:FBgn0032512	ENCSR504AYW	Bdp1	FBgn0032512	adult	adult	whole-fly	NA	adult.whole-fly	whole-fly,site-specific-recombination,insertion	remap2022_ENCSR504AYW.Bdp1.adult_whole-fly_site-specific-recombination_insertion:FBgn0032512_ENCFF587RCD,remap2022_ENCSR504AYW.Bdp1.adult_whole-fly_site-specific-recombination_insertion:FBgn0032512_ENCFF287NJX,remap2022_ENCSR504AYW.Bdp1.adult_whole-fly_site-specific-recombination_insertion:FBgn0032512_ENCFF171TBF
ENCSR504JFN.eyg.adult_whole-fly_site-specific-recombination_insertion:FBgn0000625	ENCSR504JFN	eyg	FBgn0000625	adult	adult	whole-fly	NA	adult.whole-fly	whole-fly,site-specific-recombination,insertion	remap2022_ENCSR504JFN.eyg.adult_whole-fly_site-specific-recombination_insertion:FBgn0000625_ENCFF906ONR,remap2022_ENCSR504JFN.eyg.adult_whole-fly_site-specific-recombination_insertion:FBgn0000625_ENCFF598QYG,remap2022_ENCSR504JFN.eyg.adult_whole-fly_site-specific-recombination_insertion:FBgn0000625_ENCFF301OTD
ENCSR504XNN.cnc.adult_whole-fly:FBgn0262975	ENCSR504XNN	cnc	FBgn0262975	adult	adult	whole-fly	NA	adult.whole-fly	whole-fly	remap2022_ENCSR504XNN.cnc.adult_whole-fly:FBgn0262975_ENCFF057EIK,remap2022_ENCSR504XNN.cnc.adult_whole-fly:FBgn0262975_ENCFF748XKL
ENCSR505XFU.her.adult_whole-fly_site-specific-recombination_insertion:FBgn0001185	ENCSR505XFU	her	FBgn0001185	adult	adult	whole-fly	NA	adult.whole-fly	whole-fly,site-specific-recombination,insertion	remap2022_ENCSR505XFU.her.adult_whole-fly_site-specific-recombination_insertion:FBgn0001185_ENCFF836TXE,remap2022_ENCSR505XFU.her.adult_whole-fly_site-specific-recombination_insertion:FBgn0001185_ENCFF696RVT
ENCSR507PVB.CG17568.adult_whole-fly_site-specific-recombination_insertion:FBgn0032763	ENCSR507PVB	CG17568	FBgn0032763	adult	adult	whole-fly	NA	adult.whole-fly	whole-fly,site-specific-recombination,insertion	remap2022_ENCSR507PVB.CG17568.adult_whole-fly_site-specific-recombination_insertion:FBgn0032763_ENCFF639IHW,remap2022_ENCSR507PVB.CG17568.adult_whole-fly_site-specific-recombination_insertion:FBgn0032763_ENCFF481XJE
ENCSR515HRX.CG18011.adult_whole-fly_site-specific-recombination_insertion:FBgn0033491	ENCSR515HRX	CG18011	FBgn0033491	adult	adult	whole-fly	NA	adult.whole-fly	whole-fly,site-specific-recombination,insertion	remap2022_ENCSR515HRX.CG18011.adult_whole-fly_site-specific-recombination_insertion:FBgn0033491_ENCFF808PMN,remap2022_ENCSR515HRX.CG18011.adult_whole-fly_site-specific-recombination_insertion:FBgn0033491_ENCFF042UKR,remap2022_ENCSR515HRX.CG18011.adult_whole-fly_site-specific-recombination_insertion:FBgn0033491_ENCFF933EEH
ENCSR517HVR.Mes4.adult_whole-fly_site-specific-recombination_insertion:FBgn0034726	ENCSR517HVR	Mes4	FBgn0034726	adult	adult	whole-fly	NA	adult.whole-fly	whole-fly,site-specific-recombination,insertion	remap2022_ENCSR517HVR.Mes4.adult_whole-fly_site-specific-recombination_insertion:FBgn0034726_ENCFF350OLU,remap2022_ENCSR517HVR.Mes4.adult_whole-fly_site-specific-recombination_insertion:FBgn0034726_ENCFF049ZEX
ENCSR517LBX.M1BP.adult_whole-fly_site-specific-recombination_insertion:FBgn0037621	ENCSR517LBX	M1BP	FBgn0037621	adult	adult	whole-fly	NA	adult.whole-fly	whole-fly,site-specific-recombination,insertion	remap2022_ENCSR517LBX.M1BP.adult_whole-fly_site-specific-recombination_insertion:FBgn0037621_ENCFF090ZCB,remap2022_ENCSR517LBX.M1BP.adult_whole-fly_site-specific-recombination_insertion:FBgn0037621_ENCFF398BUH,remap2022_ENCSR517LBX.M1BP.adult_whole-fly_site-specific-recombination_insertion:FBgn0037621_ENCFF529FTA
ENCSR518FUJ.pdm3.adult_whole-fly_site-specific-recombination_insertion:FBgn0261588	ENCSR518FUJ	pdm3	FBgn0261588	adult	adult	whole-fly	NA	adult.whole-fly	whole-fly,site-specific-recombination,insertion	remap2022_ENCSR518FUJ.pdm3.adult_whole-fly_site-specific-recombination_insertion:FBgn0261588_ENCFF011ASS,remap2022_ENCSR518FUJ.pdm3.adult_whole-fly_site-specific-recombination_insertion:FBgn0261588_ENCFF138LOX,remap2022_ENCSR518FUJ.pdm3.adult_whole-fly_site-specific-recombination_insertion:FBgn0261588_ENCFF464JIA
ENCSR518MQL.Hnf4.adult_whole-fly_site-specific-recombination_insertion:FBgn0004914	ENCSR518MQL	Hnf4	FBgn0004914	adult	adult	whole-fly	NA	adult.whole-fly	whole-fly,site-specific-recombination,insertion	remap2022_ENCSR518MQL.Hnf4.adult_whole-fly_site-specific-recombination_insertion:FBgn0004914_ENCFF017XLR,remap2022_ENCSR518MQL.Hnf4.adult_whole-fly_site-specific-recombination_insertion:FBgn0004914_ENCFF602IWX
ENCSR519DDL.CG6683.adult_whole-fly_site-specific-recombination_insertion:FBgn0035902	ENCSR519DDL	CG6683	FBgn0035902	adult	adult	whole-fly	NA	adult.whole-fly	whole-fly,site-specific-recombination,insertion	remap2022_ENCSR519DDL.CG6683.adult_whole-fly_site-specific-recombination_insertion:FBgn0035902_ENCFF309YWC,remap2022_ENCSR519DDL.CG6683.adult_whole-fly_site-specific-recombination_insertion:FBgn0035902_ENCFF152UUZ
ENCSR521GRU.prd.adult_whole-fly:FBgn0003145	ENCSR521GRU	prd	FBgn0003145	adult	adult	whole-fly	NA	adult.whole-fly	whole-fly	remap2022_ENCSR521GRU.prd.adult_whole-fly:FBgn0003145_ENCFF848UIP,remap2022_ENCSR521GRU.prd.adult_whole-fly:FBgn0003145_ENCFF793HNG
ENCSR521NPD.CG12071.adult_whole-fly_site-specific-recombination_insertion:FBgn0039808	ENCSR521NPD	CG12071	FBgn0039808	adult	adult	whole-fly	NA	adult.whole-fly	whole-fly,site-specific-recombination,insertion	remap2022_ENCSR521NPD.CG12071.adult_whole-fly_site-specific-recombination_insertion:FBgn0039808_ENCFF266PXX,remap2022_ENCSR521NPD.CG12071.adult_whole-fly_site-specific-recombination_insertion:FBgn0039808_ENCFF634UAH,remap2022_ENCSR521NPD.CG12071.adult_whole-fly_site-specific-recombination_insertion:FBgn0039808_ENCFF681QIG
ENCSR522NJB.repo.adult_whole-fly_site-specific-recombination_insertion:FBgn0011701	ENCSR522NJB	repo	FBgn0011701	adult	adult	whole-fly	NA	adult.whole-fly	whole-fly,site-specific-recombination,insertion	remap2022_ENCSR522NJB.repo.adult_whole-fly_site-specific-recombination_insertion:FBgn0011701_ENCFF578CME,remap2022_ENCSR522NJB.repo.adult_whole-fly_site-specific-recombination_insertion:FBgn0011701_ENCFF153ZBF
ENCSR530BVF.CG5180.adult_whole-fly_site-specific-recombination_insertion:FBgn0043457	ENCSR530BVF	CG5180	FBgn0043457	adult	adult	whole-fly	NA	adult.whole-fly	whole-fly,site-specific-recombination,insertion	remap2022_ENCSR530BVF.CG5180.adult_whole-fly_site-specific-recombination_insertion:FBgn0043457_ENCFF297QQA,remap2022_ENCSR530BVF.CG5180.adult_whole-fly_site-specific-recombination_insertion:FBgn0043457_ENCFF499FVW,remap2022_ENCSR530BVF.CG5180.adult_whole-fly_site-specific-recombination_insertion:FBgn0043457_ENCFF832USB
ENCSR530MRJ.CG8319.adult_whole-fly_site-specific-recombination_insertion:FBgn0037722	ENCSR530MRJ	CG8319	FBgn0037722	adult	adult	whole-fly	NA	adult.whole-fly	whole-fly,site-specific-recombination,insertion	remap2022_ENCSR530MRJ.CG8319.adult_whole-fly_site-specific-recombination_insertion:FBgn0037722_ENCFF251ESE,remap2022_ENCSR530MRJ.CG8319.adult_whole-fly_site-specific-recombination_insertion:FBgn0037722_ENCFF837XPO,remap2022_ENCSR530MRJ.CG8319.adult_whole-fly_site-specific-recombination_insertion:FBgn0037722_ENCFF336EDQ
ENCSR532BHA.CrebB.adult_whole-fly_site-specific-recombination_insertion:FBgn0265784	ENCSR532BHA	CrebB	FBgn0265784	adult	adult	whole-fly	NA	adult.whole-fly	whole-fly,site-specific-recombination,insertion	remap2022_ENCSR532BHA.CrebB.adult_whole-fly_site-specific-recombination_insertion:FBgn0265784_ENCFF576ADQ,remap2022_ENCSR532BHA.CrebB.adult_whole-fly_site-specific-recombination_insertion:FBgn0265784_ENCFF112LEM,remap2022_ENCSR532BHA.CrebB.adult_whole-fly_site-specific-recombination_insertion:FBgn0265784_ENCFF543QST
ENCSR532YPP.disco-r.adult_whole-fly_site-specific-recombination_insertion:FBgn0285879	ENCSR532YPP	disco-r	FBgn0285879	adult	adult	whole-fly	NA	adult.whole-fly	whole-fly,site-specific-recombination,insertion	remap2022_ENCSR532YPP.disco-r.adult_whole-fly_site-specific-recombination_insertion:FBgn0285879_ENCFF658EPB,remap2022_ENCSR532YPP.disco-r.adult_whole-fly_site-specific-recombination_insertion:FBgn0285879_ENCFF121YMW
ENCSR533CXT.BEAF-32.adult_whole-fly_site-specific-recombination_insertion:FBgn0015602	ENCSR533CXT	BEAF-32	FBgn0015602	adult	adult	whole-fly	NA	adult.whole-fly	whole-fly,site-specific-recombination,insertion	remap2022_ENCSR533CXT.BEAF-32.adult_whole-fly_site-specific-recombination_insertion:FBgn0015602_ENCFF401NEA,remap2022_ENCSR533CXT.BEAF-32.adult_whole-fly_site-specific-recombination_insertion:FBgn0015602_ENCFF096DEO,remap2022_ENCSR533CXT.BEAF-32.adult_whole-fly_site-specific-recombination_insertion:FBgn0015602_ENCFF394GTJ
ENCSR547IVT.Dek.adult_whole-fly_site-specific-recombination_insertion:FBgn0026533	ENCSR547IVT	Dek	FBgn0026533	adult	adult	whole-fly	NA	adult.whole-fly	whole-fly,site-specific-recombination,insertion	remap2022_ENCSR547IVT.Dek.adult_whole-fly_site-specific-recombination_insertion:FBgn0026533_ENCFF048KFZ,remap2022_ENCSR547IVT.Dek.adult_whole-fly_site-specific-recombination_insertion:FBgn0026533_ENCFF331HKB,remap2022_ENCSR547IVT.Dek.adult_whole-fly_site-specific-recombination_insertion:FBgn0026533_ENCFF478DER
ENCSR547SRP.Eip74EF.adult_whole-fly_insertion:FBgn0000567	ENCSR547SRP	Eip74EF	FBgn0000567	adult	adult	whole-fly	NA	adult.whole-fly	whole-fly,insertion	remap2022_ENCSR547SRP.Eip74EF.adult_whole-fly_insertion:FBgn0000567_ENCFF247SSW,remap2022_ENCSR547SRP.Eip74EF.adult_whole-fly_insertion:FBgn0000567_ENCFF076OFZ
ENCSR548EHZ.foxo.adult_whole-fly_site-specific-recombination_insertion:FBgn0038197	ENCSR548EHZ	foxo	FBgn0038197	adult	adult	whole-fly	NA	adult.whole-fly	whole-fly,site-specific-recombination,insertion	remap2022_ENCSR548EHZ.foxo.adult_whole-fly_site-specific-recombination_insertion:FBgn0038197_ENCFF014ZWS,remap2022_ENCSR548EHZ.foxo.adult_whole-fly_site-specific-recombination_insertion:FBgn0038197_ENCFF899XPB
ENCSR550SQH.eve.adult_whole-fly_site-specific-recombination_insertion:FBgn0000606	ENCSR550SQH	eve	FBgn0000606	adult	adult	whole-fly	NA	adult.whole-fly	whole-fly,site-specific-recombination,insertion	remap2022_ENCSR550SQH.eve.adult_whole-fly_site-specific-recombination_insertion:FBgn0000606_ENCFF668DNV,remap2022_ENCSR550SQH.eve.adult_whole-fly_site-specific-recombination_insertion:FBgn0000606_ENCFF601MEL
ENCSR551HEY.CG8388.adult_whole-fly_site-specific-recombination_insertion:FBgn0034062	ENCSR551HEY	CG8388	FBgn0034062	adult	adult	whole-fly	NA	adult.whole-fly	whole-fly,site-specific-recombination,insertion	remap2022_ENCSR551HEY.CG8388.adult_whole-fly_site-specific-recombination_insertion:FBgn0034062_ENCFF778QDO,remap2022_ENCSR551HEY.CG8388.adult_whole-fly_site-specific-recombination_insertion:FBgn0034062_ENCFF748VFS
ENCSR551YOZ.CG1620.adult_whole-fly_site-specific-recombination_insertion:FBgn0033183	ENCSR551YOZ	CG1620	FBgn0033183	adult	adult	whole-fly	NA	adult.whole-fly	whole-fly,site-specific-recombination,insertion	remap2022_ENCSR551YOZ.CG1620.adult_whole-fly_site-specific-recombination_insertion:FBgn0033183_ENCFF089GZO,remap2022_ENCSR551YOZ.CG1620.adult_whole-fly_site-specific-recombination_insertion:FBgn0033183_ENCFF024NGE
ENCSR555TTB.Hr51.adult_whole-fly_site-specific-recombination_insertion:FBgn0034012	ENCSR555TTB	Hr51	FBgn0034012	adult	adult	whole-fly	NA	adult.whole-fly	whole-fly,site-specific-recombination,insertion	remap2022_ENCSR555TTB.Hr51.adult_whole-fly_site-specific-recombination_insertion:FBgn0034012_ENCFF296IJW,remap2022_ENCSR555TTB.Hr51.adult_whole-fly_site-specific-recombination_insertion:FBgn0034012_ENCFF452XOO
ENCSR559AJG.E-bx.adult_whole-fly_site-specific-recombination_insertion:FBgn0000541	ENCSR559AJG	E-bx	FBgn0000541	adult	adult	whole-fly	NA	adult.whole-fly	whole-fly,site-specific-recombination,insertion	remap2022_ENCSR559AJG.E-bx.adult_whole-fly_site-specific-recombination_insertion:FBgn0000541_ENCFF108AEW,remap2022_ENCSR559AJG.E-bx.adult_whole-fly_site-specific-recombination_insertion:FBgn0000541_ENCFF921AIS,remap2022_ENCSR559AJG.E-bx.adult_whole-fly_site-specific-recombination_insertion:FBgn0000541_ENCFF465XDQ
ENCSR564UWC.Vsx1.adult_whole-fly_site-specific-recombination_insertion:FBgn0263511	ENCSR564UWC	Vsx1	FBgn0263511	adult	adult	whole-fly	NA	adult.whole-fly	whole-fly,site-specific-recombination,insertion	remap2022_ENCSR564UWC.Vsx1.adult_whole-fly_site-specific-recombination_insertion:FBgn0263511_ENCFF980PPQ,remap2022_ENCSR564UWC.Vsx1.adult_whole-fly_site-specific-recombination_insertion:FBgn0263511_ENCFF366RQK
ENCSR566ZYE.EcR.adult_whole-fly_insertion:FBgn0000546	ENCSR566ZYE	EcR	FBgn0000546	adult	adult	whole-fly	NA	adult.whole-fly	whole-fly,insertion	remap2022_ENCSR566ZYE.EcR.adult_whole-fly_insertion:FBgn0000546_ENCFF148AVN,remap2022_ENCSR566ZYE.EcR.adult_whole-fly_insertion:FBgn0000546_ENCFF479TSS,remap2022_ENCSR566ZYE.EcR.adult_whole-fly_insertion:FBgn0000546_ENCFF206NXB
ENCSR568EBW.Camta.adult_whole-fly_site-specific-recombination_insertion:FBgn0259234	ENCSR568EBW	Camta	FBgn0259234	adult	adult	whole-fly	NA	adult.whole-fly	whole-fly,site-specific-recombination,insertion	remap2022_ENCSR568EBW.Camta.adult_whole-fly_site-specific-recombination_insertion:FBgn0259234_ENCFF758DYB,remap2022_ENCSR568EBW.Camta.adult_whole-fly_site-specific-recombination_insertion:FBgn0259234_ENCFF485IRT
ENCSR569AVN.CG8478.adult_whole-fly:FBgn0037746	ENCSR569AVN	CG8478	FBgn0037746	adult	adult	whole-fly	NA	adult.whole-fly	whole-fly	remap2022_ENCSR569AVN.CG8478.adult_whole-fly:FBgn0037746_ENCFF203ACX,remap2022_ENCSR569AVN.CG8478.adult_whole-fly:FBgn0037746_ENCFF161WHP
ENCSR570ADO.sv.adult_whole-fly_site-specific-recombination_insertion:FBgn0005561	ENCSR570ADO	sv	FBgn0005561	adult	adult	whole-fly	NA	adult.whole-fly	whole-fly,site-specific-recombination,insertion	remap2022_ENCSR570ADO.sv.adult_whole-fly_site-specific-recombination_insertion:FBgn0005561_ENCFF204LCM,remap2022_ENCSR570ADO.sv.adult_whole-fly_site-specific-recombination_insertion:FBgn0005561_ENCFF190PXU,remap2022_ENCSR570ADO.sv.adult_whole-fly_site-specific-recombination_insertion:FBgn0005561_ENCFF829PDK
ENCSR572ERS.CG31627.adult_whole-fly_site-specific-recombination_insertion:FBgn0051627	ENCSR572ERS	CG31627	FBgn0051627	adult	adult	whole-fly	NA	adult.whole-fly	whole-fly,site-specific-recombination,insertion	remap2022_ENCSR572ERS.CG31627.adult_whole-fly_site-specific-recombination_insertion:FBgn0051627_ENCFF600GVP,remap2022_ENCSR572ERS.CG31627.adult_whole-fly_site-specific-recombination_insertion:FBgn0051627_ENCFF123MQR,remap2022_ENCSR572ERS.CG31627.adult_whole-fly_site-specific-recombination_insertion:FBgn0051627_ENCFF581MYX
ENCSR572JUN.Ets96B.adult_whole-fly_site-specific-recombination_insertion:FBgn0039225	ENCSR572JUN	Ets96B	FBgn0039225	adult	adult	whole-fly	NA	adult.whole-fly	whole-fly,site-specific-recombination,insertion	remap2022_ENCSR572JUN.Ets96B.adult_whole-fly_site-specific-recombination_insertion:FBgn0039225_ENCFF211QBQ,remap2022_ENCSR572JUN.Ets96B.adult_whole-fly_site-specific-recombination_insertion:FBgn0039225_ENCFF805WRR
ENCSR577TRI.CG15710.adult_whole-fly_site-specific-recombination_insertion:FBgn0034120	ENCSR577TRI	CG15710	FBgn0034120	adult	adult	whole-fly	NA	adult.whole-fly	whole-fly,site-specific-recombination,insertion	remap2022_ENCSR577TRI.CG15710.adult_whole-fly_site-specific-recombination_insertion:FBgn0034120_ENCFF207VXH,remap2022_ENCSR577TRI.CG15710.adult_whole-fly_site-specific-recombination_insertion:FBgn0034120_ENCFF782UKC
ENCSR578RWH.pzg.adult_whole-fly_site-specific-recombination_insertion:FBgn0259785	ENCSR578RWH	pzg	FBgn0259785	adult	adult	whole-fly	NA	adult.whole-fly	whole-fly,site-specific-recombination,insertion	remap2022_ENCSR578RWH.pzg.adult_whole-fly_site-specific-recombination_insertion:FBgn0259785_ENCFF834XPW,remap2022_ENCSR578RWH.pzg.adult_whole-fly_site-specific-recombination_insertion:FBgn0259785_ENCFF477DDN,remap2022_ENCSR578RWH.pzg.adult_whole-fly_site-specific-recombination_insertion:FBgn0259785_ENCFF862TJH
ENCSR579WFC.kni.adult_whole-fly_site-specific-recombination_insertion:FBgn0001320	ENCSR579WFC	kni	FBgn0001320	adult	adult	whole-fly	NA	adult.whole-fly	whole-fly,site-specific-recombination,insertion	remap2022_ENCSR579WFC.kni.adult_whole-fly_site-specific-recombination_insertion:FBgn0001320_ENCFF880BYH,remap2022_ENCSR579WFC.kni.adult_whole-fly_site-specific-recombination_insertion:FBgn0001320_ENCFF209TVC,remap2022_ENCSR579WFC.kni.adult_whole-fly_site-specific-recombination_insertion:FBgn0001320_ENCFF761BZM
ENCSR581LRS.sc.adult_whole-fly_site-specific-recombination_insertion:FBgn0004170	ENCSR581LRS	sc	FBgn0004170	adult	adult	whole-fly	NA	adult.whole-fly	whole-fly,site-specific-recombination,insertion	remap2022_ENCSR581LRS.sc.adult_whole-fly_site-specific-recombination_insertion:FBgn0004170_ENCFF018CQB,remap2022_ENCSR581LRS.sc.adult_whole-fly_site-specific-recombination_insertion:FBgn0004170_ENCFF501PSH,remap2022_ENCSR581LRS.sc.adult_whole-fly_site-specific-recombination_insertion:FBgn0004170_ENCFF974PPT
ENCSR582OWB.CG44002.adult_whole-fly_site-specific-recombination_insertion:FBgn0264744	ENCSR582OWB	CG44002	FBgn0264744	adult	adult	whole-fly	NA	adult.whole-fly	whole-fly,site-specific-recombination,insertion	remap2022_ENCSR582OWB.CG44002.adult_whole-fly_site-specific-recombination_insertion:FBgn0264744_ENCFF622ABF,remap2022_ENCSR582OWB.CG44002.adult_whole-fly_site-specific-recombination_insertion:FBgn0264744_ENCFF264ETF,remap2022_ENCSR582OWB.CG44002.adult_whole-fly_site-specific-recombination_insertion:FBgn0264744_ENCFF723CMO
ENCSR583EFI.ss.adult_whole-fly_site-specific-recombination_insertion:FBgn0003513	ENCSR583EFI	ss	FBgn0003513	adult	adult	whole-fly	NA	adult.whole-fly	whole-fly,site-specific-recombination,insertion	remap2022_ENCSR583EFI.ss.adult_whole-fly_site-specific-recombination_insertion:FBgn0003513_ENCFF099AJG,remap2022_ENCSR583EFI.ss.adult_whole-fly_site-specific-recombination_insertion:FBgn0003513_ENCFF789SWA
ENCSR584XDP.CG7368.adult_whole-fly_site-specific-recombination_insertion:FBgn0036179	ENCSR584XDP	CG7368	FBgn0036179	adult	adult	whole-fly	NA	adult.whole-fly	whole-fly,site-specific-recombination,insertion	remap2022_ENCSR584XDP.CG7368.adult_whole-fly_site-specific-recombination_insertion:FBgn0036179_ENCFF500DPZ,remap2022_ENCSR584XDP.CG7368.adult_whole-fly_site-specific-recombination_insertion:FBgn0036179_ENCFF622LCL,remap2022_ENCSR584XDP.CG7368.adult_whole-fly_site-specific-recombination_insertion:FBgn0036179_ENCFF361WVW
ENCSR587CWK.Deaf1.adult_whole-fly_site-specific-recombination_insertion:FBgn0013799	ENCSR587CWK	Deaf1	FBgn0013799	adult	adult	whole-fly	NA	adult.whole-fly	whole-fly,site-specific-recombination,insertion	remap2022_ENCSR587CWK.Deaf1.adult_whole-fly_site-specific-recombination_insertion:FBgn0013799_ENCFF820HZZ,remap2022_ENCSR587CWK.Deaf1.adult_whole-fly_site-specific-recombination_insertion:FBgn0013799_ENCFF057YUR,remap2022_ENCSR587CWK.Deaf1.adult_whole-fly_site-specific-recombination_insertion:FBgn0013799_ENCFF644IMR
ENCSR588OSO.CG17801.adult_ovary_site-specific-recombination_insertion:FBgn0038550	ENCSR588OSO	CG17801	FBgn0038550	adult	adult	ovary	NA	adult.ovary	ovary,site-specific-recombination,insertion	remap2022_ENCSR588OSO.CG17801.adult_ovary_site-specific-recombination_insertion:FBgn0038550_ENCFF328NYG,remap2022_ENCSR588OSO.CG17801.adult_ovary_site-specific-recombination_insertion:FBgn0038550_ENCFF763FHM
ENCSR589XWJ.Su-var-3-7.adult_whole-fly_site-specific-recombination_insertion:FBgn0003598	ENCSR589XWJ	Su-var-3-7	FBgn0003598	adult	adult	whole-fly	NA	adult.whole-fly	whole-fly,site-specific-recombination,insertion	remap2022_ENCSR589XWJ.Su-var-3-7.adult_whole-fly_site-specific-recombination_insertion:FBgn0003598_ENCFF717TBL,remap2022_ENCSR589XWJ.Su-var-3-7.adult_whole-fly_site-specific-recombination_insertion:FBgn0003598_ENCFF459YIY,remap2022_ENCSR589XWJ.Su-var-3-7.adult_whole-fly_site-specific-recombination_insertion:FBgn0003598_ENCFF931WLM
ENCSR591PRH.sd.adult_whole-fly_site-specific-recombination_insertion:FBgn0003345	ENCSR591PRH	sd	FBgn0003345	adult	adult	whole-fly	NA	adult.whole-fly	whole-fly,site-specific-recombination,insertion	remap2022_ENCSR591PRH.sd.adult_whole-fly_site-specific-recombination_insertion:FBgn0003345_ENCFF520ZXP,remap2022_ENCSR591PRH.sd.adult_whole-fly_site-specific-recombination_insertion:FBgn0003345_ENCFF164AIR,remap2022_ENCSR591PRH.sd.adult_whole-fly_site-specific-recombination_insertion:FBgn0003345_ENCFF273CXP
ENCSR593ZMJ.mirr.adult_whole-fly_site-specific-recombination_insertion:FBgn0014343	ENCSR593ZMJ	mirr	FBgn0014343	adult	adult	whole-fly	NA	adult.whole-fly	whole-fly,site-specific-recombination,insertion	remap2022_ENCSR593ZMJ.mirr.adult_whole-fly_site-specific-recombination_insertion:FBgn0014343_ENCFF077FPL,remap2022_ENCSR593ZMJ.mirr.adult_whole-fly_site-specific-recombination_insertion:FBgn0014343_ENCFF461UTB,remap2022_ENCSR593ZMJ.mirr.adult_whole-fly_site-specific-recombination_insertion:FBgn0014343_ENCFF101VCK
ENCSR596YNC.Crg-1.adult_whole-fly_site-specific-recombination_insertion:FBgn0021738	ENCSR596YNC	Crg-1	FBgn0021738	adult	adult	whole-fly	NA	adult.whole-fly	whole-fly,site-specific-recombination,insertion	remap2022_ENCSR596YNC.Crg-1.adult_whole-fly_site-specific-recombination_insertion:FBgn0021738_ENCFF653FGC,remap2022_ENCSR596YNC.Crg-1.adult_whole-fly_site-specific-recombination_insertion:FBgn0021738_ENCFF966AQI
ENCSR599DVZ.Tbp.adult_whole-fly_insertion:FBgn0003687	ENCSR599DVZ	Tbp	FBgn0003687	adult	adult	whole-fly	NA	adult.whole-fly	whole-fly,insertion	remap2022_ENCSR599DVZ.Tbp.adult_whole-fly_insertion:FBgn0003687_ENCFF250BXJ,remap2022_ENCSR599DVZ.Tbp.adult_whole-fly_insertion:FBgn0003687_ENCFF809IEZ
ENCSR599WVE.CG10147.adult_whole-fly_site-specific-recombination_insertion:FBgn0035702	ENCSR599WVE	CG10147	FBgn0035702	adult	adult	whole-fly	NA	adult.whole-fly	whole-fly,site-specific-recombination,insertion	remap2022_ENCSR599WVE.CG10147.adult_whole-fly_site-specific-recombination_insertion:FBgn0035702_ENCFF798DAS,remap2022_ENCSR599WVE.CG10147.adult_whole-fly_site-specific-recombination_insertion:FBgn0035702_ENCFF186ITI
ENCSR603LBA.Sp1.adult_whole-fly_site-specific-recombination_insertion:FBgn0020378	ENCSR603LBA	Sp1	FBgn0020378	adult	adult	whole-fly	NA	adult.whole-fly	whole-fly,site-specific-recombination,insertion	remap2022_ENCSR603LBA.Sp1.adult_whole-fly_site-specific-recombination_insertion:FBgn0020378_ENCFF173GBZ,remap2022_ENCSR603LBA.Sp1.adult_whole-fly_site-specific-recombination_insertion:FBgn0020378_ENCFF460GDR,remap2022_ENCSR603LBA.Sp1.adult_whole-fly_site-specific-recombination_insertion:FBgn0020378_ENCFF340GCS
ENCSR603QIJ.emc.adult_whole-fly_site-specific-recombination_insertion:FBgn0000575	ENCSR603QIJ	emc	FBgn0000575	adult	adult	whole-fly	NA	adult.whole-fly	whole-fly,site-specific-recombination,insertion	remap2022_ENCSR603QIJ.emc.adult_whole-fly_site-specific-recombination_insertion:FBgn0000575_ENCFF960WSH,remap2022_ENCSR603QIJ.emc.adult_whole-fly_site-specific-recombination_insertion:FBgn0000575_ENCFF142KBK
ENCSR605NFY.Fer2.adult_whole-fly_site-specific-recombination_insertion:FBgn0038402	ENCSR605NFY	Fer2	FBgn0038402	adult	adult	whole-fly	NA	adult.whole-fly	whole-fly,site-specific-recombination,insertion	remap2022_ENCSR605NFY.Fer2.adult_whole-fly_site-specific-recombination_insertion:FBgn0038402_ENCFF889YGT,remap2022_ENCSR605NFY.Fer2.adult_whole-fly_site-specific-recombination_insertion:FBgn0038402_ENCFF876UYC
ENCSR606GOU.lola.adult_whole-fly_insertion:FBgn0283521	ENCSR606GOU	lola	FBgn0283521	adult	adult	whole-fly	NA	adult.whole-fly	whole-fly,insertion	remap2022_ENCSR606GOU.lola.adult_whole-fly_insertion:FBgn0283521_ENCFF550HGG,remap2022_ENCSR606GOU.lola.adult_whole-fly_insertion:FBgn0283521_ENCFF424UUW
ENCSR608VFH.CG15011.adult_whole-fly_site-specific-recombination_insertion:FBgn0035518	ENCSR608VFH	CG15011	FBgn0035518	adult	adult	whole-fly	NA	adult.whole-fly	whole-fly,site-specific-recombination,insertion	remap2022_ENCSR608VFH.CG15011.adult_whole-fly_site-specific-recombination_insertion:FBgn0035518_ENCFF044OXY,remap2022_ENCSR608VFH.CG15011.adult_whole-fly_site-specific-recombination_insertion:FBgn0035518_ENCFF806MZZ,remap2022_ENCSR608VFH.CG15011.adult_whole-fly_site-specific-recombination_insertion:FBgn0035518_ENCFF127NLP
ENCSR609JDR.abd-A.adult_whole-fly_site-specific-recombination_insertion:FBgn0000014	ENCSR609JDR	abd-A	FBgn0000014	adult	adult	whole-fly	NA	adult.whole-fly	whole-fly,site-specific-recombination,insertion	remap2022_ENCSR609JDR.abd-A.adult_whole-fly_site-specific-recombination_insertion:FBgn0000014_ENCFF999PWE,remap2022_ENCSR609JDR.abd-A.adult_whole-fly_site-specific-recombination_insertion:FBgn0000014_ENCFF646QDZ,remap2022_ENCSR609JDR.abd-A.adult_whole-fly_site-specific-recombination_insertion:FBgn0000014_ENCFF036RZV
ENCSR609RLI.mio.adult_whole-fly_site-specific-recombination_insertion:FBgn0031399	ENCSR609RLI	mio	FBgn0031399	adult	adult	whole-fly	NA	adult.whole-fly	whole-fly,site-specific-recombination,insertion	remap2022_ENCSR609RLI.mio.adult_whole-fly_site-specific-recombination_insertion:FBgn0031399_ENCFF500PYX,remap2022_ENCSR609RLI.mio.adult_whole-fly_site-specific-recombination_insertion:FBgn0031399_ENCFF402RFN
ENCSR613JPW.Snoo.adult_whole-fly_site-specific-recombination_insertion:FBgn0085450	ENCSR613JPW	Snoo	FBgn0085450	adult	adult	whole-fly	NA	adult.whole-fly	whole-fly,site-specific-recombination,insertion	remap2022_ENCSR613JPW.Snoo.adult_whole-fly_site-specific-recombination_insertion:FBgn0085450_ENCFF994NLN,remap2022_ENCSR613JPW.Snoo.adult_whole-fly_site-specific-recombination_insertion:FBgn0085450_ENCFF668CIV,remap2022_ENCSR613JPW.Snoo.adult_whole-fly_site-specific-recombination_insertion:FBgn0085450_ENCFF698UUX
ENCSR615RMC.D19B.adult_whole-fly_site-specific-recombination_insertion:FBgn0022699	ENCSR615RMC	D19B	FBgn0022699	adult	adult	whole-fly	NA	adult.whole-fly	whole-fly,site-specific-recombination,insertion	remap2022_ENCSR615RMC.D19B.adult_whole-fly_site-specific-recombination_insertion:FBgn0022699_ENCFF513MUL,remap2022_ENCSR615RMC.D19B.adult_whole-fly_site-specific-recombination_insertion:FBgn0022699_ENCFF265URJ,remap2022_ENCSR615RMC.D19B.adult_whole-fly_site-specific-recombination_insertion:FBgn0022699_ENCFF189FHS,remap2022_ENCSR615RMC.D19B.adult_whole-fly_site-specific-recombination_insertion:FBg…
ENCSR619HLP.CG8944.adult_whole-fly_site-specific-recombination_insertion:FBgn0030680	ENCSR619HLP	CG8944	FBgn0030680	adult	adult	whole-fly	NA	adult.whole-fly	whole-fly,site-specific-recombination,insertion	remap2022_ENCSR619HLP.CG8944.adult_whole-fly_site-specific-recombination_insertion:FBgn0030680_ENCFF915BYG,remap2022_ENCSR619HLP.CG8944.adult_whole-fly_site-specific-recombination_insertion:FBgn0030680_ENCFF693RXE,remap2022_ENCSR619HLP.CG8944.adult_whole-fly_site-specific-recombination_insertion:FBgn0030680_ENCFF764RHX
ENCSR621PCK.gfzf.adult_whole-fly_site-specific-recombination_insertion:FBgn0250732	ENCSR621PCK	gfzf	FBgn0250732	adult	adult	whole-fly	NA	adult.whole-fly	whole-fly,site-specific-recombination,insertion	remap2022_ENCSR621PCK.gfzf.adult_whole-fly_site-specific-recombination_insertion:FBgn0250732_ENCFF186OFE,remap2022_ENCSR621PCK.gfzf.adult_whole-fly_site-specific-recombination_insertion:FBgn0250732_ENCFF293XHC
ENCSR624PKN.CG9727.adult_whole-fly_site-specific-recombination_insertion:FBgn0037445	ENCSR624PKN	CG9727	FBgn0037445	adult	adult	whole-fly	NA	adult.whole-fly	whole-fly,site-specific-recombination,insertion	remap2022_ENCSR624PKN.CG9727.adult_whole-fly_site-specific-recombination_insertion:FBgn0037445_ENCFF057PKR,remap2022_ENCSR624PKN.CG9727.adult_whole-fly_site-specific-recombination_insertion:FBgn0037445_ENCFF968XCZ,remap2022_ENCSR624PKN.CG9727.adult_whole-fly_site-specific-recombination_insertion:FBgn0037445_ENCFF101OXX
ENCSR629WQT.Trl.adult_whole-fly_site-specific-recombination_insertion:FBgn0013263	ENCSR629WQT	Trl	FBgn0013263	adult	adult	whole-fly	NA	adult.whole-fly	whole-fly,site-specific-recombination,insertion	remap2022_ENCSR629WQT.Trl.adult_whole-fly_site-specific-recombination_insertion:FBgn0013263_ENCFF097AIN,remap2022_ENCSR629WQT.Trl.adult_whole-fly_site-specific-recombination_insertion:FBgn0013263_ENCFF383LLP,remap2022_ENCSR629WQT.Trl.adult_whole-fly_site-specific-recombination_insertion:FBgn0013263_ENCFF481BWD
ENCSR631PLV.fru.adult_whole-fly_site-specific-recombination_insertion:FBgn0004652	ENCSR631PLV	fru	FBgn0004652	adult	adult	whole-fly	NA	adult.whole-fly	whole-fly,site-specific-recombination,insertion	remap2022_ENCSR631PLV.fru.adult_whole-fly_site-specific-recombination_insertion:FBgn0004652_ENCFF780NKK,remap2022_ENCSR631PLV.fru.adult_whole-fly_site-specific-recombination_insertion:FBgn0004652_ENCFF608QBA,remap2022_ENCSR631PLV.fru.adult_whole-fly_site-specific-recombination_insertion:FBgn0004652_ENCFF085EVE
ENCSR633IKC.Ssrp.adult_whole-fly_site-specific-recombination_insertion:FBgn0010278	ENCSR633IKC	Ssrp	FBgn0010278	adult	adult	whole-fly	NA	adult.whole-fly	whole-fly,site-specific-recombination,insertion	remap2022_ENCSR633IKC.Ssrp.adult_whole-fly_site-specific-recombination_insertion:FBgn0010278_ENCFF990PCM,remap2022_ENCSR633IKC.Ssrp.adult_whole-fly_site-specific-recombination_insertion:FBgn0010278_ENCFF766ONG
ENCSR636FRF.pan.adult_whole-fly:FBgn0085432	ENCSR636FRF	pan	FBgn0085432	adult	adult	whole-fly	NA	adult.whole-fly	whole-fly	remap2022_ENCSR636FRF.pan.adult_whole-fly:FBgn0085432_ENCFF509JTJ,remap2022_ENCSR636FRF.pan.adult_whole-fly:FBgn0085432_ENCFF994OSM,remap2022_ENCSR636FRF.pan.adult_whole-fly:FBgn0085432_ENCFF374HTX
ENCSR636TIL.maf-S.adult_whole-fly_site-specific-recombination_insertion:FBgn0034534	ENCSR636TIL	maf-S	FBgn0034534	adult	adult	whole-fly	NA	adult.whole-fly	whole-fly,site-specific-recombination,insertion	remap2022_ENCSR636TIL.maf-S.adult_whole-fly_site-specific-recombination_insertion:FBgn0034534_ENCFF613ZRP,remap2022_ENCSR636TIL.maf-S.adult_whole-fly_site-specific-recombination_insertion:FBgn0034534_ENCFF381TRN
ENCSR637FPY.slou.adult_whole-fly_site-specific-recombination_insertion:FBgn0002941	ENCSR637FPY	slou	FBgn0002941	adult	adult	whole-fly	NA	adult.whole-fly	whole-fly,site-specific-recombination,insertion	remap2022_ENCSR637FPY.slou.adult_whole-fly_site-specific-recombination_insertion:FBgn0002941_ENCFF415SNY,remap2022_ENCSR637FPY.slou.adult_whole-fly_site-specific-recombination_insertion:FBgn0002941_ENCFF372BZO,remap2022_ENCSR637FPY.slou.adult_whole-fly_site-specific-recombination_insertion:FBgn0002941_ENCFF232FOF
ENCSR637GDK.Su-var-2-10.adult_whole-fly_site-specific-recombination_insertion:FBgn0003612	ENCSR637GDK	Su-var-2-10	FBgn0003612	adult	adult	whole-fly	NA	adult.whole-fly	whole-fly,site-specific-recombination,insertion	remap2022_ENCSR637GDK.Su-var-2-10.adult_whole-fly_site-specific-recombination_insertion:FBgn0003612_ENCFF305VYG,remap2022_ENCSR637GDK.Su-var-2-10.adult_whole-fly_site-specific-recombination_insertion:FBgn0003612_ENCFF984GML
ENCSR641KZS.E-spl-m5-HLH.adult_whole-fly_site-specific-recombination_insertion:FBgn0002631	ENCSR641KZS	E-spl-m5-HLH	FBgn0002631	adult	adult	whole-fly	NA	adult.whole-fly	whole-fly,site-specific-recombination,insertion	remap2022_ENCSR641KZS.E-spl-m5-HLH.adult_whole-fly_site-specific-recombination_insertion:FBgn0002631_ENCFF694NLJ,remap2022_ENCSR641KZS.E-spl-m5-HLH.adult_whole-fly_site-specific-recombination_insertion:FBgn0002631_ENCFF929JEN
ENCSR643EOU.l-3-neo38.adult_whole-fly_site-specific-recombination_insertion:FBgn0265276	ENCSR643EOU	l-3-neo38	FBgn0265276	adult	adult	whole-fly	NA	adult.whole-fly	whole-fly,site-specific-recombination,insertion	remap2022_ENCSR643EOU.l-3-neo38.adult_whole-fly_site-specific-recombination_insertion:FBgn0265276_ENCFF086ZSJ,remap2022_ENCSR643EOU.l-3-neo38.adult_whole-fly_site-specific-recombination_insertion:FBgn0265276_ENCFF636HDD
ENCSR643MOM.odd.adult_whole-fly_site-specific-recombination_insertion:FBgn0002985	ENCSR643MOM	odd	FBgn0002985	adult	adult	whole-fly	NA	adult.whole-fly	whole-fly,site-specific-recombination,insertion	remap2022_ENCSR643MOM.odd.adult_whole-fly_site-specific-recombination_insertion:FBgn0002985_ENCFF106IYI,remap2022_ENCSR643MOM.odd.adult_whole-fly_site-specific-recombination_insertion:FBgn0002985_ENCFF007AAS
ENCSR645UUT.CG12219.adult_whole-fly_site-specific-recombination_insertion:FBgn0043796	ENCSR645UUT	CG12219	FBgn0043796	adult	adult	whole-fly	NA	adult.whole-fly	whole-fly,site-specific-recombination,insertion	remap2022_ENCSR645UUT.CG12219.adult_whole-fly_site-specific-recombination_insertion:FBgn0043796_ENCFF922XSE,remap2022_ENCSR645UUT.CG12219.adult_whole-fly_site-specific-recombination_insertion:FBgn0043796_ENCFF229JLG,remap2022_ENCSR645UUT.CG12219.adult_whole-fly_site-specific-recombination_insertion:FBgn0043796_ENCFF121JNW
ENCSR648YVN.CG3163.adult_whole-fly_site-specific-recombination_insertion:FBgn0034961	ENCSR648YVN	CG3163	FBgn0034961	adult	adult	whole-fly	NA	adult.whole-fly	whole-fly,site-specific-recombination,insertion	remap2022_ENCSR648YVN.CG3163.adult_whole-fly_site-specific-recombination_insertion:FBgn0034961_ENCFF288PSQ,remap2022_ENCSR648YVN.CG3163.adult_whole-fly_site-specific-recombination_insertion:FBgn0034961_ENCFF582PTB,remap2022_ENCSR648YVN.CG3163.adult_whole-fly_site-specific-recombination_insertion:FBgn0034961_ENCFF882RKK
ENCSR652KCU.CG6813.adult_whole-fly_site-specific-recombination_insertion:FBgn0037923	ENCSR652KCU	CG6813	FBgn0037923	adult	adult	whole-fly	NA	adult.whole-fly	whole-fly,site-specific-recombination,insertion	remap2022_ENCSR652KCU.CG6813.adult_whole-fly_site-specific-recombination_insertion:FBgn0037923_ENCFF341FVB,remap2022_ENCSR652KCU.CG6813.adult_whole-fly_site-specific-recombination_insertion:FBgn0037923_ENCFF837TBH
ENCSR655FTR.CG4820.adult_whole-fly_site-specific-recombination_insertion:FBgn0037876	ENCSR655FTR	CG4820	FBgn0037876	adult	adult	whole-fly	NA	adult.whole-fly	whole-fly,site-specific-recombination,insertion	remap2022_ENCSR655FTR.CG4820.adult_whole-fly_site-specific-recombination_insertion:FBgn0037876_ENCFF262UDK,remap2022_ENCSR655FTR.CG4820.adult_whole-fly_site-specific-recombination_insertion:FBgn0037876_ENCFF944TOM,remap2022_ENCSR655FTR.CG4820.adult_whole-fly_site-specific-recombination_insertion:FBgn0037876_ENCFF786RBZ
ENCSR657ULJ.su-Hw.adult_whole-fly:FBgn0003567	ENCSR657ULJ	su-Hw	FBgn0003567	adult	adult	whole-fly	NA	adult.whole-fly	whole-fly	remap2022_ENCSR657ULJ.su-Hw.adult_whole-fly:FBgn0003567_ENCFF496OCG,remap2022_ENCSR657ULJ.su-Hw.adult_whole-fly:FBgn0003567_ENCFF031LPJ
ENCSR658VWK.scrt.adult_whole-fly_site-specific-recombination_insertion:FBgn0004880	ENCSR658VWK	scrt	FBgn0004880	adult	adult	whole-fly	NA	adult.whole-fly	whole-fly,site-specific-recombination,insertion	remap2022_ENCSR658VWK.scrt.adult_whole-fly_site-specific-recombination_insertion:FBgn0004880_ENCFF787AUX,remap2022_ENCSR658VWK.scrt.adult_whole-fly_site-specific-recombination_insertion:FBgn0004880_ENCFF204ZHW
ENCSR660AYK.CG45071.adult_whole-fly_site-specific-recombination_insertion:FBgn0266441	ENCSR660AYK	CG45071	FBgn0266441	adult	adult	whole-fly	NA	adult.whole-fly	whole-fly,site-specific-recombination,insertion	remap2022_ENCSR660AYK.CG45071.adult_whole-fly_site-specific-recombination_insertion:FBgn0266441_ENCFF525YID,remap2022_ENCSR660AYK.CG45071.adult_whole-fly_site-specific-recombination_insertion:FBgn0266441_ENCFF556BRS
ENCSR661BEZ.CTCF.adult_whole-fly_site-specific-recombination_insertion:FBgn0035769	ENCSR661BEZ	CTCF	FBgn0035769	adult	adult	whole-fly	NA	adult.whole-fly	whole-fly,site-specific-recombination,insertion	remap2022_ENCSR661BEZ.CTCF.adult_whole-fly_site-specific-recombination_insertion:FBgn0035769_ENCFF040HHO,remap2022_ENCSR661BEZ.CTCF.adult_whole-fly_site-specific-recombination_insertion:FBgn0035769_ENCFF698ZRB,remap2022_ENCSR661BEZ.CTCF.adult_whole-fly_site-specific-recombination_insertion:FBgn0035769_ENCFF988KQK,remap2022_ENCSR661BEZ.CTCF.adult_whole-fly_site-specific-recombination_insertion:FBg…
ENCSR663AGU.Sox100B.adult_whole-fly_site-specific-recombination_insertion:FBgn0024288	ENCSR663AGU	Sox100B	FBgn0024288	adult	adult	whole-fly	NA	adult.whole-fly	whole-fly,site-specific-recombination,insertion	remap2022_ENCSR663AGU.Sox100B.adult_whole-fly_site-specific-recombination_insertion:FBgn0024288_ENCFF664ERC,remap2022_ENCSR663AGU.Sox100B.adult_whole-fly_site-specific-recombination_insertion:FBgn0024288_ENCFF734CVT,remap2022_ENCSR663AGU.Sox100B.adult_whole-fly_site-specific-recombination_insertion:FBgn0024288_ENCFF484PFN
ENCSR671XAK.E-spl-m3-HLH.adult_whole-fly_site-specific-recombination_insertion:FBgn0002609	ENCSR671XAK	E-spl-m3-HLH	FBgn0002609	adult	adult	whole-fly	NA	adult.whole-fly	whole-fly,site-specific-recombination,insertion	remap2022_ENCSR671XAK.E-spl-m3-HLH.adult_whole-fly_site-specific-recombination_insertion:FBgn0002609_ENCFF406YNO,remap2022_ENCSR671XAK.E-spl-m3-HLH.adult_whole-fly_site-specific-recombination_insertion:FBgn0002609_ENCFF644MUQ
ENCSR672KPS.Max.adult_whole-fly_site-specific-recombination_insertion:FBgn0017578	ENCSR672KPS	Max	FBgn0017578	adult	adult	whole-fly	NA	adult.whole-fly	whole-fly,site-specific-recombination,insertion	remap2022_ENCSR672KPS.Max.adult_whole-fly_site-specific-recombination_insertion:FBgn0017578_ENCFF833RVK,remap2022_ENCSR672KPS.Max.adult_whole-fly_site-specific-recombination_insertion:FBgn0017578_ENCFF500WIE
ENCSR672NRQ.Hr39.adult_whole-fly:FBgn0261239	ENCSR672NRQ	Hr39	FBgn0261239	adult	adult	whole-fly	NA	adult.whole-fly	whole-fly	remap2022_ENCSR672NRQ.Hr39.adult_whole-fly:FBgn0261239_ENCFF163STL,remap2022_ENCSR672NRQ.Hr39.adult_whole-fly:FBgn0261239_ENCFF462ALE
ENCSR672VJL.CG4617.adult_whole-fly_site-specific-recombination_insertion:FBgn0029936	ENCSR672VJL	CG4617	FBgn0029936	adult	adult	whole-fly	NA	adult.whole-fly	whole-fly,site-specific-recombination,insertion	remap2022_ENCSR672VJL.CG4617.adult_whole-fly_site-specific-recombination_insertion:FBgn0029936_ENCFF559AWC,remap2022_ENCSR672VJL.CG4617.adult_whole-fly_site-specific-recombination_insertion:FBgn0029936_ENCFF694WRO,remap2022_ENCSR672VJL.CG4617.adult_whole-fly_site-specific-recombination_insertion:FBgn0029936_ENCFF260QLG
ENCSR673MPB.CG3032.adult_whole-fly_site-specific-recombination_insertion:FBgn0029928	ENCSR673MPB	CG3032	FBgn0029928	adult	adult	whole-fly	NA	adult.whole-fly	whole-fly,site-specific-recombination,insertion	remap2022_ENCSR673MPB.CG3032.adult_whole-fly_site-specific-recombination_insertion:FBgn0029928_ENCFF310ZLF,remap2022_ENCSR673MPB.CG3032.adult_whole-fly_site-specific-recombination_insertion:FBgn0029928_ENCFF203MPV
ENCSR676ZTM.CG12104.adult_whole-fly_site-specific-recombination_insertion:FBgn0035238	ENCSR676ZTM	CG12104	FBgn0035238	adult	adult	whole-fly	NA	adult.whole-fly	whole-fly,site-specific-recombination,insertion	remap2022_ENCSR676ZTM.CG12104.adult_whole-fly_site-specific-recombination_insertion:FBgn0035238_ENCFF153GBI,remap2022_ENCSR676ZTM.CG12104.adult_whole-fly_site-specific-recombination_insertion:FBgn0035238_ENCFF187TTJ,remap2022_ENCSR676ZTM.CG12104.adult_whole-fly_site-specific-recombination_insertion:FBgn0035238_ENCFF824ZBH
ENCSR680NFF.CG1603.adult_whole-fly_site-specific-recombination_insertion:FBgn0033185	ENCSR680NFF	CG1603	FBgn0033185	adult	adult	whole-fly	NA	adult.whole-fly	whole-fly,site-specific-recombination,insertion	remap2022_ENCSR680NFF.CG1603.adult_whole-fly_site-specific-recombination_insertion:FBgn0033185_ENCFF684IFQ,remap2022_ENCSR680NFF.CG1603.adult_whole-fly_site-specific-recombination_insertion:FBgn0033185_ENCFF468NGL
ENCSR681RZY.CG7987.adult_whole-fly_site-specific-recombination_insertion:FBgn0038244	ENCSR681RZY	CG7987	FBgn0038244	adult	adult	whole-fly	NA	adult.whole-fly	whole-fly,site-specific-recombination,insertion	remap2022_ENCSR681RZY.CG7987.adult_whole-fly_site-specific-recombination_insertion:FBgn0038244_ENCFF467MFV,remap2022_ENCSR681RZY.CG7987.adult_whole-fly_site-specific-recombination_insertion:FBgn0038244_ENCFF609BZR
ENCSR681YMA.pho.adult_whole-fly_site-specific-recombination_insertion:FBgn0002521	ENCSR681YMA	pho	FBgn0002521	adult	adult	whole-fly	NA	adult.whole-fly	whole-fly,site-specific-recombination,insertion	remap2022_ENCSR681YMA.pho.adult_whole-fly_site-specific-recombination_insertion:FBgn0002521_ENCFF423TDS,remap2022_ENCSR681YMA.pho.adult_whole-fly_site-specific-recombination_insertion:FBgn0002521_ENCFF459YTB
ENCSR682NHG.NC2-beta.adult_whole-fly_site-specific-recombination_insertion:FBgn0028926	ENCSR682NHG	NC2-beta	FBgn0028926	adult	adult	whole-fly	NA	adult.whole-fly	whole-fly,site-specific-recombination,insertion	remap2022_ENCSR682NHG.NC2-beta.adult_whole-fly_site-specific-recombination_insertion:FBgn0028926_ENCFF379RLK,remap2022_ENCSR682NHG.NC2-beta.adult_whole-fly_site-specific-recombination_insertion:FBgn0028926_ENCFF962IKJ
ENCSR682YQM.pros.adult_whole-fly_site-specific-recombination_insertion:FBgn0004595	ENCSR682YQM	pros	FBgn0004595	adult	adult	whole-fly	NA	adult.whole-fly	whole-fly,site-specific-recombination,insertion	remap2022_ENCSR682YQM.pros.adult_whole-fly_site-specific-recombination_insertion:FBgn0004595_ENCFF492XBL,remap2022_ENCSR682YQM.pros.adult_whole-fly_site-specific-recombination_insertion:FBgn0004595_ENCFF968XWD,remap2022_ENCSR682YQM.pros.adult_whole-fly_site-specific-recombination_insertion:FBgn0004595_ENCFF569XPC
ENCSR690WSD.Hr3.adult_whole-fly_site-specific-recombination_insertion:FBgn0000448	ENCSR690WSD	Hr3	FBgn0000448	adult	adult	whole-fly	NA	adult.whole-fly	whole-fly,site-specific-recombination,insertion	remap2022_ENCSR690WSD.Hr3.adult_whole-fly_site-specific-recombination_insertion:FBgn0000448_ENCFF102HMP,remap2022_ENCSR690WSD.Hr3.adult_whole-fly_site-specific-recombination_insertion:FBgn0000448_ENCFF354JTX,remap2022_ENCSR690WSD.Hr3.adult_whole-fly_site-specific-recombination_insertion:FBgn0000448_ENCFF912CJB
ENCSR692JFG.hkb.adult_whole-fly:FBgn0261434	ENCSR692JFG	hkb	FBgn0261434	adult	adult	whole-fly	NA	adult.whole-fly	whole-fly	remap2022_ENCSR692JFG.hkb.adult_whole-fly:FBgn0261434_ENCFF861KUQ,remap2022_ENCSR692JFG.hkb.adult_whole-fly:FBgn0261434_ENCFF485GIG
ENCSR692UBK.Abd-B.adult_whole-fly_site-specific-recombination_insertion:FBgn0000015	ENCSR692UBK	Abd-B	FBgn0000015	adult	adult	whole-fly	NA	adult.whole-fly	whole-fly,site-specific-recombination,insertion	remap2022_ENCSR692UBK.Abd-B.adult_whole-fly_site-specific-recombination_insertion:FBgn0000015_ENCFF252IVG,remap2022_ENCSR692UBK.Abd-B.adult_whole-fly_site-specific-recombination_insertion:FBgn0000015_ENCFF820QJV
ENCSR698IEF.Xbp1.adult_whole-fly_site-specific-recombination_insertion:FBgn0021872	ENCSR698IEF	Xbp1	FBgn0021872	adult	adult	whole-fly	NA	adult.whole-fly	whole-fly,site-specific-recombination,insertion	remap2022_ENCSR698IEF.Xbp1.adult_whole-fly_site-specific-recombination_insertion:FBgn0021872_ENCFF374UCJ,remap2022_ENCSR698IEF.Xbp1.adult_whole-fly_site-specific-recombination_insertion:FBgn0021872_ENCFF494SCW,remap2022_ENCSR698IEF.Xbp1.adult_whole-fly_site-specific-recombination_insertion:FBgn0021872_ENCFF715PCW
ENCSR709YEU.CG2678.adult_whole-fly_site-specific-recombination_insertion:FBgn0014931	ENCSR709YEU	CG2678	FBgn0014931	adult	adult	whole-fly	NA	adult.whole-fly	whole-fly,site-specific-recombination,insertion	remap2022_ENCSR709YEU.CG2678.adult_whole-fly_site-specific-recombination_insertion:FBgn0014931_ENCFF842IJQ,remap2022_ENCSR709YEU.CG2678.adult_whole-fly_site-specific-recombination_insertion:FBgn0014931_ENCFF327JAZ,remap2022_ENCSR709YEU.CG2678.adult_whole-fly_site-specific-recombination_insertion:FBgn0014931_ENCFF167IOA
ENCSR711BGO.usp.adult_whole-fly_insertion:FBgn0003964	ENCSR711BGO	usp	FBgn0003964	adult	adult	whole-fly	NA	adult.whole-fly	whole-fly,insertion	remap2022_ENCSR711BGO.usp.adult_whole-fly_insertion:FBgn0003964_ENCFF454XJP,remap2022_ENCSR711BGO.usp.adult_whole-fly_insertion:FBgn0003964_ENCFF383IGC,remap2022_ENCSR711BGO.usp.adult_whole-fly_insertion:FBgn0003964_ENCFF400ZEW
ENCSR711UTK.CTCF.Schneider-2:FBgn0035769	ENCSR711UTK	CTCF	FBgn0035769	Schneider-2:FBgn0035769	S2	S2	NA	S2		remap2022_ENCSR711UTK.CTCF.Schneider-2:FBgn0035769_ENCFF654PRC,remap2022_ENCSR711UTK.CTCF.Schneider-2:FBgn0035769_ENCFF621QJT
ENCSR713FWS.CG4282.adult_whole-fly_site-specific-recombination_insertion:FBgn0034114	ENCSR713FWS	CG4282	FBgn0034114	adult	adult	whole-fly	NA	adult.whole-fly	whole-fly,site-specific-recombination,insertion	remap2022_ENCSR713FWS.CG4282.adult_whole-fly_site-specific-recombination_insertion:FBgn0034114_ENCFF664HJE,remap2022_ENCSR713FWS.CG4282.adult_whole-fly_site-specific-recombination_insertion:FBgn0034114_ENCFF977LYM
ENCSR713PDJ.insv.adult_whole-fly_site-specific-recombination_insertion:FBgn0031434	ENCSR713PDJ	insv	FBgn0031434	adult	adult	whole-fly	NA	adult.whole-fly	whole-fly,site-specific-recombination,insertion	remap2022_ENCSR713PDJ.insv.adult_whole-fly_site-specific-recombination_insertion:FBgn0031434_ENCFF312SZI,remap2022_ENCSR713PDJ.insv.adult_whole-fly_site-specific-recombination_insertion:FBgn0031434_ENCFF310PQY,remap2022_ENCSR713PDJ.insv.adult_whole-fly_site-specific-recombination_insertion:FBgn0031434_ENCFF195KCZ
ENCSR718USP.CG13894.adult_whole-fly_site-specific-recombination_insertion:FBgn0035157	ENCSR718USP	CG13894	FBgn0035157	adult	adult	whole-fly	NA	adult.whole-fly	whole-fly,site-specific-recombination,insertion	remap2022_ENCSR718USP.CG13894.adult_whole-fly_site-specific-recombination_insertion:FBgn0035157_ENCFF631OAA,remap2022_ENCSR718USP.CG13894.adult_whole-fly_site-specific-recombination_insertion:FBgn0035157_ENCFF540TRA,remap2022_ENCSR718USP.CG13894.adult_whole-fly_site-specific-recombination_insertion:FBgn0035157_ENCFF976CCP
ENCSR722RUT.dpn.adult_whole-fly_site-specific-recombination_insertion:FBgn0010109	ENCSR722RUT	dpn	FBgn0010109	adult	adult	whole-fly	NA	adult.whole-fly	whole-fly,site-specific-recombination,insertion	remap2022_ENCSR722RUT.dpn.adult_whole-fly_site-specific-recombination_insertion:FBgn0010109_ENCFF239GCK,remap2022_ENCSR722RUT.dpn.adult_whole-fly_site-specific-recombination_insertion:FBgn0010109_ENCFF335CQS,remap2022_ENCSR722RUT.dpn.adult_whole-fly_site-specific-recombination_insertion:FBgn0010109_ENCFF267GJX
ENCSR724XTR.Trl.adult_whole-fly:FBgn0013263	ENCSR724XTR	Trl	FBgn0013263	adult	adult	whole-fly	NA	adult.whole-fly	whole-fly	remap2022_ENCSR724XTR.Trl.adult_whole-fly:FBgn0013263_ENCFF220GHK,remap2022_ENCSR724XTR.Trl.adult_whole-fly:FBgn0013263_ENCFF725JVW
ENCSR731HHO.Sox102F.adult_whole-fly_site-specific-recombination_insertion:FBgn0039938	ENCSR731HHO	Sox102F	FBgn0039938	adult	adult	whole-fly	NA	adult.whole-fly	whole-fly,site-specific-recombination,insertion	remap2022_ENCSR731HHO.Sox102F.adult_whole-fly_site-specific-recombination_insertion:FBgn0039938_ENCFF156OYI,remap2022_ENCSR731HHO.Sox102F.adult_whole-fly_site-specific-recombination_insertion:FBgn0039938_ENCFF287MZD
ENCSR741KZZ.ftz-f1.adult_whole-fly_site-specific-recombination_insertion:FBgn0001078	ENCSR741KZZ	ftz-f1	FBgn0001078	adult	adult	whole-fly	NA	adult.whole-fly	whole-fly,site-specific-recombination,insertion	remap2022_ENCSR741KZZ.ftz-f1.adult_whole-fly_site-specific-recombination_insertion:FBgn0001078_ENCFF006MPW,remap2022_ENCSR741KZZ.ftz-f1.adult_whole-fly_site-specific-recombination_insertion:FBgn0001078_ENCFF406UBM,remap2022_ENCSR741KZZ.ftz-f1.adult_whole-fly_site-specific-recombination_insertion:FBgn0001078_ENCFF116MQJ
ENCSR745UIJ.Sox14.adult_whole-fly_site-specific-recombination_insertion:FBgn0005612	ENCSR745UIJ	Sox14	FBgn0005612	adult	adult	whole-fly	NA	adult.whole-fly	whole-fly,site-specific-recombination,insertion	remap2022_ENCSR745UIJ.Sox14.adult_whole-fly_site-specific-recombination_insertion:FBgn0005612_ENCFF255HSY,remap2022_ENCSR745UIJ.Sox14.adult_whole-fly_site-specific-recombination_insertion:FBgn0005612_ENCFF806FAQ,remap2022_ENCSR745UIJ.Sox14.adult_whole-fly_site-specific-recombination_insertion:FBgn0005612_ENCFF466NKR
ENCSR748DHJ.tio.adult_whole-fly_site-specific-recombination_insertion:FBgn0028979	ENCSR748DHJ	tio	FBgn0028979	adult	adult	whole-fly	NA	adult.whole-fly	whole-fly,site-specific-recombination,insertion	remap2022_ENCSR748DHJ.tio.adult_whole-fly_site-specific-recombination_insertion:FBgn0028979_ENCFF959OVX,remap2022_ENCSR748DHJ.tio.adult_whole-fly_site-specific-recombination_insertion:FBgn0028979_ENCFF453VZS
ENCSR748WWE.psq.adult_whole-fly_site-specific-recombination_insertion:FBgn0263102	ENCSR748WWE	psq	FBgn0263102	adult	adult	whole-fly	NA	adult.whole-fly	whole-fly,site-specific-recombination,insertion	remap2022_ENCSR748WWE.psq.adult_whole-fly_site-specific-recombination_insertion:FBgn0263102_ENCFF968UJR,remap2022_ENCSR748WWE.psq.adult_whole-fly_site-specific-recombination_insertion:FBgn0263102_ENCFF596YDN,remap2022_ENCSR748WWE.psq.adult_whole-fly_site-specific-recombination_insertion:FBgn0263102_ENCFF918XIM
ENCSR748ZJA.Dif.adult_whole-fly_site-specific-recombination_insertion:FBgn0011274	ENCSR748ZJA	Dif	FBgn0011274	adult	adult	whole-fly	NA	adult.whole-fly	whole-fly,site-specific-recombination,insertion	remap2022_ENCSR748ZJA.Dif.adult_whole-fly_site-specific-recombination_insertion:FBgn0011274_ENCFF575ERU,remap2022_ENCSR748ZJA.Dif.adult_whole-fly_site-specific-recombination_insertion:FBgn0011274_ENCFF902DBO
ENCSR749USJ.jing.adult_whole-fly_site-specific-recombination_insertion:FBgn0086655	ENCSR749USJ	jing	FBgn0086655	adult	adult	whole-fly	NA	adult.whole-fly	whole-fly,site-specific-recombination,insertion	remap2022_ENCSR749USJ.jing.adult_whole-fly_site-specific-recombination_insertion:FBgn0086655_ENCFF277BNE,remap2022_ENCSR749USJ.jing.adult_whole-fly_site-specific-recombination_insertion:FBgn0086655_ENCFF519SHS
ENCSR751FSX.CG10631.adult_whole-fly_site-specific-recombination_insertion:FBgn0032817	ENCSR751FSX	CG10631	FBgn0032817	adult	adult	whole-fly	NA	adult.whole-fly	whole-fly,site-specific-recombination,insertion	remap2022_ENCSR751FSX.CG10631.adult_whole-fly_site-specific-recombination_insertion:FBgn0032817_ENCFF627SOE,remap2022_ENCSR751FSX.CG10631.adult_whole-fly_site-specific-recombination_insertion:FBgn0032817_ENCFF277YNA
ENCSR755ZOR.CG45071.adult_whole-fly_site-specific-recombination_insertion:FBgn0266441	ENCSR755ZOR	CG45071	FBgn0266441	adult	adult	whole-fly	NA	adult.whole-fly	whole-fly,site-specific-recombination,insertion	remap2022_ENCSR755ZOR.CG45071.adult_whole-fly_site-specific-recombination_insertion:FBgn0266441_ENCFF316XVF,remap2022_ENCSR755ZOR.CG45071.adult_whole-fly_site-specific-recombination_insertion:FBgn0266441_ENCFF517YCF,remap2022_ENCSR755ZOR.CG45071.adult_whole-fly_site-specific-recombination_insertion:FBgn0266441_ENCFF422WPO
ENCSR756AUU.sage.adult_whole-fly_site-specific-recombination_insertion:FBgn0037672	ENCSR756AUU	sage	FBgn0037672	adult	adult	whole-fly	NA	adult.whole-fly	whole-fly,site-specific-recombination,insertion	remap2022_ENCSR756AUU.sage.adult_whole-fly_site-specific-recombination_insertion:FBgn0037672_ENCFF630FGP,remap2022_ENCSR756AUU.sage.adult_whole-fly_site-specific-recombination_insertion:FBgn0037672_ENCFF568TRU
ENCSR761TCG.su-Hw.adult_whole-fly_site-specific-recombination_insertion:FBgn0003567	ENCSR761TCG	su-Hw	FBgn0003567	adult	adult	whole-fly	NA	adult.whole-fly	whole-fly,site-specific-recombination,insertion	remap2022_ENCSR761TCG.su-Hw.adult_whole-fly_site-specific-recombination_insertion:FBgn0003567_ENCFF922TFY,remap2022_ENCSR761TCG.su-Hw.adult_whole-fly_site-specific-recombination_insertion:FBgn0003567_ENCFF794QAW,remap2022_ENCSR761TCG.su-Hw.adult_whole-fly_site-specific-recombination_insertion:FBgn0003567_ENCFF470XXH
ENCSR763HRS.Ets21C.adult_whole-fly_site-specific-recombination_insertion:FBgn0005660	ENCSR763HRS	Ets21C	FBgn0005660	adult	adult	whole-fly	NA	adult.whole-fly	whole-fly,site-specific-recombination,insertion	remap2022_ENCSR763HRS.Ets21C.adult_whole-fly_site-specific-recombination_insertion:FBgn0005660_ENCFF594MPW,remap2022_ENCSR763HRS.Ets21C.adult_whole-fly_site-specific-recombination_insertion:FBgn0005660_ENCFF591KUG,remap2022_ENCSR763HRS.Ets21C.adult_whole-fly_site-specific-recombination_insertion:FBgn0005660_ENCFF989ADP
ENCSR764LDS.CG8089.adult_whole-fly_site-specific-recombination_insertion:FBgn0033993	ENCSR764LDS	CG8089	FBgn0033993	adult	adult	whole-fly	NA	adult.whole-fly	whole-fly,site-specific-recombination,insertion	remap2022_ENCSR764LDS.CG8089.adult_whole-fly_site-specific-recombination_insertion:FBgn0033993_ENCFF953CWP,remap2022_ENCSR764LDS.CG8089.adult_whole-fly_site-specific-recombination_insertion:FBgn0033993_ENCFF780WOZ,remap2022_ENCSR764LDS.CG8089.adult_whole-fly_site-specific-recombination_insertion:FBgn0033993_ENCFF038IBC
ENCSR766CLL.cg.adult_whole-fly_site-specific-recombination_insertion:FBgn0000289	ENCSR766CLL	cg	FBgn0000289	adult	adult	whole-fly	NA	adult.whole-fly	whole-fly,site-specific-recombination,insertion	remap2022_ENCSR766CLL.cg.adult_whole-fly_site-specific-recombination_insertion:FBgn0000289_ENCFF083NGK,remap2022_ENCSR766CLL.cg.adult_whole-fly_site-specific-recombination_insertion:FBgn0000289_ENCFF602HSX,remap2022_ENCSR766CLL.cg.adult_whole-fly_site-specific-recombination_insertion:FBgn0000289_ENCFF791XXW
ENCSR769SFV.bab2.adult_whole-fly_site-specific-recombination_insertion:FBgn0025525	ENCSR769SFV	bab2	FBgn0025525	adult	adult	whole-fly	NA	adult.whole-fly	whole-fly,site-specific-recombination,insertion	remap2022_ENCSR769SFV.bab2.adult_whole-fly_site-specific-recombination_insertion:FBgn0025525_ENCFF013AEG,remap2022_ENCSR769SFV.bab2.adult_whole-fly_site-specific-recombination_insertion:FBgn0025525_ENCFF807RXK
ENCSR770AUN.luna.adult_whole-fly_site-specific-recombination_insertion:FBgn0040765	ENCSR770AUN	luna	FBgn0040765	adult	adult	whole-fly	NA	adult.whole-fly	whole-fly,site-specific-recombination,insertion	remap2022_ENCSR770AUN.luna.adult_whole-fly_site-specific-recombination_insertion:FBgn0040765_ENCFF299CPI,remap2022_ENCSR770AUN.luna.adult_whole-fly_site-specific-recombination_insertion:FBgn0040765_ENCFF257EOV
ENCSR771CMI.ems.adult_whole-fly_site-specific-recombination_insertion:FBgn0000576	ENCSR771CMI	ems	FBgn0000576	adult	adult	whole-fly	NA	adult.whole-fly	whole-fly,site-specific-recombination,insertion	remap2022_ENCSR771CMI.ems.adult_whole-fly_site-specific-recombination_insertion:FBgn0000576_ENCFF020LXO,remap2022_ENCSR771CMI.ems.adult_whole-fly_site-specific-recombination_insertion:FBgn0000576_ENCFF501URX,remap2022_ENCSR771CMI.ems.adult_whole-fly_site-specific-recombination_insertion:FBgn0000576_ENCFF173KYX
ENCSR775WXN.Meics.adult_whole-fly_site-specific-recombination_insertion:FBgn0025874	ENCSR775WXN	Meics	FBgn0025874	adult	adult	whole-fly	NA	adult.whole-fly	whole-fly,site-specific-recombination,insertion	remap2022_ENCSR775WXN.Meics.adult_whole-fly_site-specific-recombination_insertion:FBgn0025874_ENCFF948HEE,remap2022_ENCSR775WXN.Meics.adult_whole-fly_site-specific-recombination_insertion:FBgn0025874_ENCFF761UEY
ENCSR776AVR.CG7786.adult_whole-fly_site-specific-recombination_insertion:FBgn0034096	ENCSR776AVR	CG7786	FBgn0034096	adult	adult	whole-fly	NA	adult.whole-fly	whole-fly,site-specific-recombination,insertion	remap2022_ENCSR776AVR.CG7786.adult_whole-fly_site-specific-recombination_insertion:FBgn0034096_ENCFF111QCZ,remap2022_ENCSR776AVR.CG7786.adult_whole-fly_site-specific-recombination_insertion:FBgn0034096_ENCFF258YIY
ENCSR776VNR.gcm.adult_whole-fly_site-specific-recombination_insertion:FBgn0014179	ENCSR776VNR	gcm	FBgn0014179	adult	adult	whole-fly	NA	adult.whole-fly	whole-fly,site-specific-recombination,insertion	remap2022_ENCSR776VNR.gcm.adult_whole-fly_site-specific-recombination_insertion:FBgn0014179_ENCFF286TFM,remap2022_ENCSR776VNR.gcm.adult_whole-fly_site-specific-recombination_insertion:FBgn0014179_ENCFF664AMV
ENCSR785GVH.cnc.adult_whole-fly:FBgn0262975	ENCSR785GVH	cnc	FBgn0262975	adult	adult	whole-fly	NA	adult.whole-fly	whole-fly	remap2022_ENCSR785GVH.cnc.adult_whole-fly:FBgn0262975_ENCFF651HHO,remap2022_ENCSR785GVH.cnc.adult_whole-fly:FBgn0262975_ENCFF066CVP
ENCSR786ALB.fkh.adult_whole-fly_site-specific-recombination_insertion:FBgn0000659	ENCSR786ALB	fkh	FBgn0000659	adult	adult	whole-fly	NA	adult.whole-fly	whole-fly,site-specific-recombination,insertion	remap2022_ENCSR786ALB.fkh.adult_whole-fly_site-specific-recombination_insertion:FBgn0000659_ENCFF848ESX,remap2022_ENCSR786ALB.fkh.adult_whole-fly_site-specific-recombination_insertion:FBgn0000659_ENCFF405MHL,remap2022_ENCSR786ALB.fkh.adult_whole-fly_site-specific-recombination_insertion:FBgn0000659_ENCFF289WBG
ENCSR789TLW.CG13296.adult_whole-fly_site-specific-recombination_insertion:FBgn0035687	ENCSR789TLW	CG13296	FBgn0035687	adult	adult	whole-fly	NA	adult.whole-fly	whole-fly,site-specific-recombination,insertion	remap2022_ENCSR789TLW.CG13296.adult_whole-fly_site-specific-recombination_insertion:FBgn0035687_ENCFF409RBG,remap2022_ENCSR789TLW.CG13296.adult_whole-fly_site-specific-recombination_insertion:FBgn0035687_ENCFF343HPO,remap2022_ENCSR789TLW.CG13296.adult_whole-fly_site-specific-recombination_insertion:FBgn0035687_ENCFF250OTA
ENCSR790NPU.CG8159.adult_whole-fly_site-specific-recombination_insertion:FBgn0037619	ENCSR790NPU	CG8159	FBgn0037619	adult	adult	whole-fly	NA	adult.whole-fly	whole-fly,site-specific-recombination,insertion	remap2022_ENCSR790NPU.CG8159.adult_whole-fly_site-specific-recombination_insertion:FBgn0037619_ENCFF622AGO,remap2022_ENCSR790NPU.CG8159.adult_whole-fly_site-specific-recombination_insertion:FBgn0037619_ENCFF482XTU,remap2022_ENCSR790NPU.CG8159.adult_whole-fly_site-specific-recombination_insertion:FBgn0037619_ENCFF019HQS
ENCSR791TWT.CHES-1-like.adult_whole-fly_site-specific-recombination_insertion:FBgn0029504	ENCSR791TWT	CHES-1-like	FBgn0029504	adult	adult	whole-fly	NA	adult.whole-fly	whole-fly,site-specific-recombination,insertion	remap2022_ENCSR791TWT.CHES-1-like.adult_whole-fly_site-specific-recombination_insertion:FBgn0029504_ENCFF114ZDV,remap2022_ENCSR791TWT.CHES-1-like.adult_whole-fly_site-specific-recombination_insertion:FBgn0029504_ENCFF169GAN
ENCSR792RAL.CG43347.adult_whole-fly_site-specific-recombination_insertion:FBgn0263072	ENCSR792RAL	CG43347	FBgn0263072	adult	adult	whole-fly	NA	adult.whole-fly	whole-fly,site-specific-recombination,insertion	remap2022_ENCSR792RAL.CG43347.adult_whole-fly_site-specific-recombination_insertion:FBgn0263072_ENCFF184JQP,remap2022_ENCSR792RAL.CG43347.adult_whole-fly_site-specific-recombination_insertion:FBgn0263072_ENCFF062LSB
ENCSR793JPA.tx.adult_whole-fly_site-specific-recombination_insertion:FBgn0263118	ENCSR793JPA	tx	FBgn0263118	adult	adult	whole-fly	NA	adult.whole-fly	whole-fly,site-specific-recombination,insertion	remap2022_ENCSR793JPA.tx.adult_whole-fly_site-specific-recombination_insertion:FBgn0263118_ENCFF381HMN,remap2022_ENCSR793JPA.tx.adult_whole-fly_site-specific-recombination_insertion:FBgn0263118_ENCFF565IPQ
ENCSR794HZG.HmgZ.adult_whole-fly_site-specific-recombination_insertion:FBgn0010228	ENCSR794HZG	HmgZ	FBgn0010228	adult	adult	whole-fly	NA	adult.whole-fly	whole-fly,site-specific-recombination,insertion	remap2022_ENCSR794HZG.HmgZ.adult_whole-fly_site-specific-recombination_insertion:FBgn0010228_ENCFF759BQK,remap2022_ENCSR794HZG.HmgZ.adult_whole-fly_site-specific-recombination_insertion:FBgn0010228_ENCFF091QRE
ENCSR795MVJ.B-H2.adult_whole-fly_site-specific-recombination_insertion:FBgn0004854	ENCSR795MVJ	B-H2	FBgn0004854	adult	adult	whole-fly	NA	adult.whole-fly	whole-fly,site-specific-recombination,insertion	remap2022_ENCSR795MVJ.B-H2.adult_whole-fly_site-specific-recombination_insertion:FBgn0004854_ENCFF110MDN,remap2022_ENCSR795MVJ.B-H2.adult_whole-fly_site-specific-recombination_insertion:FBgn0004854_ENCFF289NEY
ENCSR796DJB.fd96Cb.adult_whole-fly_site-specific-recombination_insertion:FBgn0004898	ENCSR796DJB	fd96Cb	FBgn0004898	adult	adult	whole-fly	NA	adult.whole-fly	whole-fly,site-specific-recombination,insertion	remap2022_ENCSR796DJB.fd96Cb.adult_whole-fly_site-specific-recombination_insertion:FBgn0004898_ENCFF835GUO,remap2022_ENCSR796DJB.fd96Cb.adult_whole-fly_site-specific-recombination_insertion:FBgn0004898_ENCFF538VMX
ENCSR796JXT.CG11723.adult_whole-fly_site-specific-recombination_insertion:FBgn0031391	ENCSR796JXT	CG11723	FBgn0031391	adult	adult	whole-fly	NA	adult.whole-fly	whole-fly,site-specific-recombination,insertion	remap2022_ENCSR796JXT.CG11723.adult_whole-fly_site-specific-recombination_insertion:FBgn0031391_ENCFF462RQD,remap2022_ENCSR796JXT.CG11723.adult_whole-fly_site-specific-recombination_insertion:FBgn0031391_ENCFF647WGY
ENCSR796MDV.BuGZ.adult_whole-fly_site-specific-recombination_insertion:FBgn0032600	ENCSR796MDV	BuGZ	FBgn0032600	adult	adult	whole-fly	NA	adult.whole-fly	whole-fly,site-specific-recombination,insertion	remap2022_ENCSR796MDV.BuGZ.adult_whole-fly_site-specific-recombination_insertion:FBgn0032600_ENCFF112NPM,remap2022_ENCSR796MDV.BuGZ.adult_whole-fly_site-specific-recombination_insertion:FBgn0032600_ENCFF992RJN
ENCSR797YWF.E-spl-m7-HLH.adult_whole-fly_site-specific-recombination_insertion:FBgn0002633	ENCSR797YWF	E-spl-m7-HLH	FBgn0002633	adult	adult	whole-fly	NA	adult.whole-fly	whole-fly,site-specific-recombination,insertion	remap2022_ENCSR797YWF.E-spl-m7-HLH.adult_whole-fly_site-specific-recombination_insertion:FBgn0002633_ENCFF186OPT,remap2022_ENCSR797YWF.E-spl-m7-HLH.adult_whole-fly_site-specific-recombination_insertion:FBgn0002633_ENCFF147BFZ,remap2022_ENCSR797YWF.E-spl-m7-HLH.adult_whole-fly_site-specific-recombination_insertion:FBgn0002633_ENCFF814GZG
ENCSR798RBJ.zf30C.adult_whole-fly_site-specific-recombination_insertion:FBgn0270924	ENCSR798RBJ	zf30C	FBgn0270924	adult	adult	whole-fly	NA	adult.whole-fly	whole-fly,site-specific-recombination,insertion	remap2022_ENCSR798RBJ.zf30C.adult_whole-fly_site-specific-recombination_insertion:FBgn0270924_ENCFF430RLQ,remap2022_ENCSR798RBJ.zf30C.adult_whole-fly_site-specific-recombination_insertion:FBgn0270924_ENCFF313BEQ,remap2022_ENCSR798RBJ.zf30C.adult_whole-fly_site-specific-recombination_insertion:FBgn0270924_ENCFF250WCL
ENCSR800TLY.CG15514.adult_whole-fly_site-specific-recombination_insertion:FBgn0039712	ENCSR800TLY	CG15514	FBgn0039712	adult	adult	whole-fly	NA	adult.whole-fly	whole-fly,site-specific-recombination,insertion	remap2022_ENCSR800TLY.CG15514.adult_whole-fly_site-specific-recombination_insertion:FBgn0039712_ENCFF278AWL,remap2022_ENCSR800TLY.CG15514.adult_whole-fly_site-specific-recombination_insertion:FBgn0039712_ENCFF412WKH,remap2022_ENCSR800TLY.CG15514.adult_whole-fly_site-specific-recombination_insertion:FBgn0039712_ENCFF463KKZ
ENCSR800UAU.D1.adult_whole-fly_site-specific-recombination_insertion:FBgn0000412	ENCSR800UAU	D1	FBgn0000412	adult	adult	whole-fly	NA	adult.whole-fly	whole-fly,site-specific-recombination,insertion	remap2022_ENCSR800UAU.D1.adult_whole-fly_site-specific-recombination_insertion:FBgn0000412_ENCFF175HRZ,remap2022_ENCSR800UAU.D1.adult_whole-fly_site-specific-recombination_insertion:FBgn0000412_ENCFF849RJF
ENCSR801AQB.lilli.adult_whole-fly_site-specific-recombination_insertion:FBgn0041111	ENCSR801AQB	lilli	FBgn0041111	adult	adult	whole-fly	NA	adult.whole-fly	whole-fly,site-specific-recombination,insertion	remap2022_ENCSR801AQB.lilli.adult_whole-fly_site-specific-recombination_insertion:FBgn0041111_ENCFF053RCH,remap2022_ENCSR801AQB.lilli.adult_whole-fly_site-specific-recombination_insertion:FBgn0041111_ENCFF600QHJ,remap2022_ENCSR801AQB.lilli.adult_whole-fly_site-specific-recombination_insertion:FBgn0041111_ENCFF377EHU
ENCSR804FUX.CG5204.adult_whole-fly_site-specific-recombination_insertion:FBgn0032473	ENCSR804FUX	CG5204	FBgn0032473	adult	adult	whole-fly	NA	adult.whole-fly	whole-fly,site-specific-recombination,insertion	remap2022_ENCSR804FUX.CG5204.adult_whole-fly_site-specific-recombination_insertion:FBgn0032473_ENCFF840RAU,remap2022_ENCSR804FUX.CG5204.adult_whole-fly_site-specific-recombination_insertion:FBgn0032473_ENCFF262YZM
ENCSR805JGA.btn.adult_whole-fly_site-specific-recombination_insertion:FBgn0014949	ENCSR805JGA	btn	FBgn0014949	adult	adult	whole-fly	NA	adult.whole-fly	whole-fly,site-specific-recombination,insertion	remap2022_ENCSR805JGA.btn.adult_whole-fly_site-specific-recombination_insertion:FBgn0014949_ENCFF736JFT,remap2022_ENCSR805JGA.btn.adult_whole-fly_site-specific-recombination_insertion:FBgn0014949_ENCFF455RBL
ENCSR808XNJ.p53.adult_whole-fly_site-specific-recombination_insertion:FBgn0039044	ENCSR808XNJ	p53	FBgn0039044	adult	adult	whole-fly	NA	adult.whole-fly	whole-fly,site-specific-recombination,insertion	remap2022_ENCSR808XNJ.p53.adult_whole-fly_site-specific-recombination_insertion:FBgn0039044_ENCFF389CAR,remap2022_ENCSR808XNJ.p53.adult_whole-fly_site-specific-recombination_insertion:FBgn0039044_ENCFF409PZO
ENCSR810MLF.CG17829.adult_whole-fly_site-specific-recombination_insertion:FBgn0025635	ENCSR810MLF	CG17829	FBgn0025635	adult	adult	whole-fly	NA	adult.whole-fly	whole-fly,site-specific-recombination,insertion	remap2022_ENCSR810MLF.CG17829.adult_whole-fly_site-specific-recombination_insertion:FBgn0025635_ENCFF145JXM,remap2022_ENCSR810MLF.CG17829.adult_whole-fly_site-specific-recombination_insertion:FBgn0025635_ENCFF550NXO
ENCSR810MQU.Klf15.adult_whole-fly_site-specific-recombination_insertion:FBgn0025679	ENCSR810MQU	Klf15	FBgn0025679	adult	adult	whole-fly	NA	adult.whole-fly	whole-fly,site-specific-recombination,insertion	remap2022_ENCSR810MQU.Klf15.adult_whole-fly_site-specific-recombination_insertion:FBgn0025679_ENCFF725WEE,remap2022_ENCSR810MQU.Klf15.adult_whole-fly_site-specific-recombination_insertion:FBgn0025679_ENCFF587WYB
ENCSR811GFT.Ets65A.adult_whole-fly_site-specific-recombination_insertion:FBgn0005658	ENCSR811GFT	Ets65A	FBgn0005658	adult	adult	whole-fly	NA	adult.whole-fly	whole-fly,site-specific-recombination,insertion	remap2022_ENCSR811GFT.Ets65A.adult_whole-fly_site-specific-recombination_insertion:FBgn0005658_ENCFF625AUQ,remap2022_ENCSR811GFT.Ets65A.adult_whole-fly_site-specific-recombination_insertion:FBgn0005658_ENCFF520JXQ,remap2022_ENCSR811GFT.Ets65A.adult_whole-fly_site-specific-recombination_insertion:FBgn0005658_ENCFF186ZYD
ENCSR816TQX.Vsx2.adult_whole-fly_site-specific-recombination_insertion:FBgn0263512	ENCSR816TQX	Vsx2	FBgn0263512	adult	adult	whole-fly	NA	adult.whole-fly	whole-fly,site-specific-recombination,insertion	remap2022_ENCSR816TQX.Vsx2.adult_whole-fly_site-specific-recombination_insertion:FBgn0263512_ENCFF582MOU,remap2022_ENCSR816TQX.Vsx2.adult_whole-fly_site-specific-recombination_insertion:FBgn0263512_ENCFF875RTM
ENCSR821PDI.E-spl-m-beta-HLH.adult_whole-fly_site-specific-recombination_insertion:FBgn0002733	ENCSR821PDI	E-spl-m-beta-HLH	FBgn0002733	adult	adult	whole-fly	NA	adult.whole-fly	whole-fly,site-specific-recombination,insertion	remap2022_ENCSR821PDI.E-spl-m-beta-HLH.adult_whole-fly_site-specific-recombination_insertion:FBgn0002733_ENCFF700XPT,remap2022_ENCSR821PDI.E-spl-m-beta-HLH.adult_whole-fly_site-specific-recombination_insertion:FBgn0002733_ENCFF348IUU,remap2022_ENCSR821PDI.E-spl-m-beta-HLH.adult_whole-fly_site-specific-recombination_insertion:FBgn0002733_ENCFF736NGQ
ENCSR821QQH.h.adult_whole-fly:FBgn0001168	ENCSR821QQH	h	FBgn0001168	adult	adult	whole-fly	NA	adult.whole-fly	whole-fly	remap2022_ENCSR821QQH.h.adult_whole-fly:FBgn0001168_ENCFF264JTQ,remap2022_ENCSR821QQH.h.adult_whole-fly:FBgn0001168_ENCFF500OQN
ENCSR824HQS.OdsH.adult_whole-fly_site-specific-recombination_insertion:FBgn0026058	ENCSR824HQS	OdsH	FBgn0026058	adult	adult	whole-fly	NA	adult.whole-fly	whole-fly,site-specific-recombination,insertion	remap2022_ENCSR824HQS.OdsH.adult_whole-fly_site-specific-recombination_insertion:FBgn0026058_ENCFF351BCH,remap2022_ENCSR824HQS.OdsH.adult_whole-fly_site-specific-recombination_insertion:FBgn0026058_ENCFF093LKL
ENCSR824RLH.br.adult_whole-fly_site-specific-recombination_insertion:FBgn0283451	ENCSR824RLH	br	FBgn0283451	adult	adult	whole-fly	NA	adult.whole-fly	whole-fly,site-specific-recombination,insertion	remap2022_ENCSR824RLH.br.adult_whole-fly_site-specific-recombination_insertion:FBgn0283451_ENCFF883WLZ,remap2022_ENCSR824RLH.br.adult_whole-fly_site-specific-recombination_insertion:FBgn0283451_ENCFF985IXE
ENCSR826CFP.ouib.adult_whole-fly_site-specific-recombination_insertion:FBgn0037618	ENCSR826CFP	ouib	FBgn0037618	adult	adult	whole-fly	NA	adult.whole-fly	whole-fly,site-specific-recombination,insertion	remap2022_ENCSR826CFP.ouib.adult_whole-fly_site-specific-recombination_insertion:FBgn0037618_ENCFF614OSZ,remap2022_ENCSR826CFP.ouib.adult_whole-fly_site-specific-recombination_insertion:FBgn0037618_ENCFF685GOJ,remap2022_ENCSR826CFP.ouib.adult_whole-fly_site-specific-recombination_insertion:FBgn0037618_ENCFF667JHF
ENCSR829XOQ.Asciz.adult_whole-fly_site-specific-recombination_insertion:FBgn0035407	ENCSR829XOQ	Asciz	FBgn0035407	adult	adult	whole-fly	NA	adult.whole-fly	whole-fly,site-specific-recombination,insertion	remap2022_ENCSR829XOQ.Asciz.adult_whole-fly_site-specific-recombination_insertion:FBgn0035407_ENCFF514ODM,remap2022_ENCSR829XOQ.Asciz.adult_whole-fly_site-specific-recombination_insertion:FBgn0035407_ENCFF504SWX
ENCSR829ZIC.N.adult_whole-fly_insertion:FBgn0004647	ENCSR829ZIC	N	FBgn0004647	adult	adult	whole-fly	NA	adult.whole-fly	whole-fly,insertion	remap2022_ENCSR829ZIC.N.adult_whole-fly_insertion:FBgn0004647_ENCFF755XXR,remap2022_ENCSR829ZIC.N.adult_whole-fly_insertion:FBgn0004647_ENCFF795RLZ
ENCSR833EEQ.CG34376.adult_whole-fly_site-specific-recombination_insertion:FBgn0085405	ENCSR833EEQ	CG34376	FBgn0085405	adult	adult	whole-fly	NA	adult.whole-fly	whole-fly,site-specific-recombination,insertion	remap2022_ENCSR833EEQ.CG34376.adult_whole-fly_site-specific-recombination_insertion:FBgn0085405_ENCFF684AEI,remap2022_ENCSR833EEQ.CG34376.adult_whole-fly_site-specific-recombination_insertion:FBgn0085405_ENCFF766UNF
ENCSR833LUF.OdsH.adult_whole-fly_site-specific-recombination_insertion:FBgn0026058	ENCSR833LUF	OdsH	FBgn0026058	adult	adult	whole-fly	NA	adult.whole-fly	whole-fly,site-specific-recombination,insertion	remap2022_ENCSR833LUF.OdsH.adult_whole-fly_site-specific-recombination_insertion:FBgn0026058_ENCFF278KQX,remap2022_ENCSR833LUF.OdsH.adult_whole-fly_site-specific-recombination_insertion:FBgn0026058_ENCFF338KHD,remap2022_ENCSR833LUF.OdsH.adult_whole-fly_site-specific-recombination_insertion:FBgn0026058_ENCFF943SZY
ENCSR836VAV.usp.adult_whole-fly_insertion:FBgn0003964	ENCSR836VAV	usp	FBgn0003964	adult	adult	whole-fly	NA	adult.whole-fly	whole-fly,insertion	remap2022_ENCSR836VAV.usp.adult_whole-fly_insertion:FBgn0003964_ENCFF062CCL,remap2022_ENCSR836VAV.usp.adult_whole-fly_insertion:FBgn0003964_ENCFF393BQV,remap2022_ENCSR836VAV.usp.adult_whole-fly_insertion:FBgn0003964_ENCFF352CUZ
ENCSR842URM.psq.Kc167:FBgn0263102	ENCSR842URM	psq	FBgn0263102	Kc167:FBgn0263102	Kc	Kc	NA	Kc		remap2022_ENCSR842URM.psq.Kc167:FBgn0263102_ENCFF582WLV,remap2022_ENCSR842URM.psq.Kc167:FBgn0263102_ENCFF296UXE
ENCSR844XMJ.CG10431.adult_whole-fly_site-specific-recombination_insertion:FBgn0032730	ENCSR844XMJ	CG10431	FBgn0032730	adult	adult	whole-fly	NA	adult.whole-fly	whole-fly,site-specific-recombination,insertion	remap2022_ENCSR844XMJ.CG10431.adult_whole-fly_site-specific-recombination_insertion:FBgn0032730_ENCFF713BFY,remap2022_ENCSR844XMJ.CG10431.adult_whole-fly_site-specific-recombination_insertion:FBgn0032730_ENCFF810JBZ,remap2022_ENCSR844XMJ.CG10431.adult_whole-fly_site-specific-recombination_insertion:FBgn0032730_ENCFF966TWT
ENCSR846PTH.CG16779.adult_whole-fly_site-specific-recombination_insertion:FBgn0037698	ENCSR846PTH	CG16779	FBgn0037698	adult	adult	whole-fly	NA	adult.whole-fly	whole-fly,site-specific-recombination,insertion	remap2022_ENCSR846PTH.CG16779.adult_whole-fly_site-specific-recombination_insertion:FBgn0037698_ENCFF695XIW,remap2022_ENCSR846PTH.CG16779.adult_whole-fly_site-specific-recombination_insertion:FBgn0037698_ENCFF256HRN,remap2022_ENCSR846PTH.CG16779.adult_whole-fly_site-specific-recombination_insertion:FBgn0037698_ENCFF675HBZ
ENCSR848GYF.CG16863.adult_whole-fly_site-specific-recombination_insertion:FBgn0028931	ENCSR848GYF	CG16863	FBgn0028931	adult	adult	whole-fly	NA	adult.whole-fly	whole-fly,site-specific-recombination,insertion	remap2022_ENCSR848GYF.CG16863.adult_whole-fly_site-specific-recombination_insertion:FBgn0028931_ENCFF480WWA,remap2022_ENCSR848GYF.CG16863.adult_whole-fly_site-specific-recombination_insertion:FBgn0028931_ENCFF729ZWT,remap2022_ENCSR848GYF.CG16863.adult_whole-fly_site-specific-recombination_insertion:FBgn0028931_ENCFF563XFM
ENCSR850IRM.CG6765.adult_whole-fly_site-specific-recombination_insertion:FBgn0035903	ENCSR850IRM	CG6765	FBgn0035903	adult	adult	whole-fly	NA	adult.whole-fly	whole-fly,site-specific-recombination,insertion	remap2022_ENCSR850IRM.CG6765.adult_whole-fly_site-specific-recombination_insertion:FBgn0035903_ENCFF035OHQ,remap2022_ENCSR850IRM.CG6765.adult_whole-fly_site-specific-recombination_insertion:FBgn0035903_ENCFF251OIU,remap2022_ENCSR850IRM.CG6765.adult_whole-fly_site-specific-recombination_insertion:FBgn0035903_ENCFF806VYL
ENCSR851UBK.dac.adult_whole-fly_site-specific-recombination_insertion:FBgn0005677	ENCSR851UBK	dac	FBgn0005677	adult	adult	whole-fly	NA	adult.whole-fly	whole-fly,site-specific-recombination,insertion	remap2022_ENCSR851UBK.dac.adult_whole-fly_site-specific-recombination_insertion:FBgn0005677_ENCFF023LPN,remap2022_ENCSR851UBK.dac.adult_whole-fly_site-specific-recombination_insertion:FBgn0005677_ENCFF285QQE
ENCSR855AGQ.ey.adult_whole-fly_site-specific-recombination_insertion:FBgn0005558	ENCSR855AGQ	ey	FBgn0005558	adult	adult	whole-fly	NA	adult.whole-fly	whole-fly,site-specific-recombination,insertion	remap2022_ENCSR855AGQ.ey.adult_whole-fly_site-specific-recombination_insertion:FBgn0005558_ENCFF796TBM,remap2022_ENCSR855AGQ.ey.adult_whole-fly_site-specific-recombination_insertion:FBgn0005558_ENCFF971TYP
ENCSR855JSV.CG8301.adult_whole-fly_site-specific-recombination_insertion:FBgn0037717	ENCSR855JSV	CG8301	FBgn0037717	adult	adult	whole-fly	NA	adult.whole-fly	whole-fly,site-specific-recombination,insertion	remap2022_ENCSR855JSV.CG8301.adult_whole-fly_site-specific-recombination_insertion:FBgn0037717_ENCFF974CKL,remap2022_ENCSR855JSV.CG8301.adult_whole-fly_site-specific-recombination_insertion:FBgn0037717_ENCFF425PES
ENCSR855PBX.Mnt.adult_whole-fly_site-specific-recombination_insertion:FBgn0023215	ENCSR855PBX	Mnt	FBgn0023215	adult	adult	whole-fly	NA	adult.whole-fly	whole-fly,site-specific-recombination,insertion	remap2022_ENCSR855PBX.Mnt.adult_whole-fly_site-specific-recombination_insertion:FBgn0023215_ENCFF814ZUX,remap2022_ENCSR855PBX.Mnt.adult_whole-fly_site-specific-recombination_insertion:FBgn0023215_ENCFF430IRG
ENCSR856SZD.ADD1.adult_whole-fly_site-specific-recombination_insertion:FBgn0026573	ENCSR856SZD	ADD1	FBgn0026573	adult	adult	whole-fly	NA	adult.whole-fly	whole-fly,site-specific-recombination,insertion	remap2022_ENCSR856SZD.ADD1.adult_whole-fly_site-specific-recombination_insertion:FBgn0026573_ENCFF598NDY,remap2022_ENCSR856SZD.ADD1.adult_whole-fly_site-specific-recombination_insertion:FBgn0026573_ENCFF514RYM
ENCSR857XGK.Su-var-205.adult_whole-fly:FBgn0003607	ENCSR857XGK	Su-var-205	FBgn0003607	adult	adult	whole-fly	NA	adult.whole-fly	whole-fly	remap2022_ENCSR857XGK.Su-var-205.adult_whole-fly:FBgn0003607_ENCFF888THP,remap2022_ENCSR857XGK.Su-var-205.adult_whole-fly:FBgn0003607_ENCFF434MQL
ENCSR860FUA.CG4854.adult_whole-fly_site-specific-recombination_insertion:FBgn0038766	ENCSR860FUA	CG4854	FBgn0038766	adult	adult	whole-fly	NA	adult.whole-fly	whole-fly,site-specific-recombination,insertion	remap2022_ENCSR860FUA.CG4854.adult_whole-fly_site-specific-recombination_insertion:FBgn0038766_ENCFF002YND,remap2022_ENCSR860FUA.CG4854.adult_whole-fly_site-specific-recombination_insertion:FBgn0038766_ENCFF910NSS,remap2022_ENCSR860FUA.CG4854.adult_whole-fly_site-specific-recombination_insertion:FBgn0038766_ENCFF073ISE,remap2022_ENCSR860FUA.CG4854.adult_whole-fly_site-specific-recombination_inser…
ENCSR861RPB.CG13775.adult_whole-fly_site-specific-recombination_insertion:FBgn0031874	ENCSR861RPB	CG13775	FBgn0031874	adult	adult	whole-fly	NA	adult.whole-fly	whole-fly,site-specific-recombination,insertion	remap2022_ENCSR861RPB.CG13775.adult_whole-fly_site-specific-recombination_insertion:FBgn0031874_ENCFF017MCB,remap2022_ENCSR861RPB.CG13775.adult_whole-fly_site-specific-recombination_insertion:FBgn0031874_ENCFF329GFA,remap2022_ENCSR861RPB.CG13775.adult_whole-fly_site-specific-recombination_insertion:FBgn0031874_ENCFF266IEP
ENCSR861XSB.mod-mdg4.adult_whole-fly_site-specific-recombination_insertion:FBgn0002781	ENCSR861XSB	mod-mdg4	FBgn0002781	adult	adult	whole-fly	NA	adult.whole-fly	whole-fly,site-specific-recombination,insertion	remap2022_ENCSR861XSB.mod-mdg4.adult_whole-fly_site-specific-recombination_insertion:FBgn0002781_ENCFF321HZE,remap2022_ENCSR861XSB.mod-mdg4.adult_whole-fly_site-specific-recombination_insertion:FBgn0002781_ENCFF073PXC,remap2022_ENCSR861XSB.mod-mdg4.adult_whole-fly_site-specific-recombination_insertion:FBgn0002781_ENCFF420XIT,remap2022_ENCSR861XSB.mod-mdg4.adult_whole-fly_site-specific-recombinati…
ENCSR864LDV.CG10462.adult_whole-fly_site-specific-recombination_insertion:FBgn0032815	ENCSR864LDV	CG10462	FBgn0032815	adult	adult	whole-fly	NA	adult.whole-fly	whole-fly,site-specific-recombination,insertion	remap2022_ENCSR864LDV.CG10462.adult_whole-fly_site-specific-recombination_insertion:FBgn0032815_ENCFF668GOQ,remap2022_ENCSR864LDV.CG10462.adult_whole-fly_site-specific-recombination_insertion:FBgn0032815_ENCFF109ALV
ENCSR864SNW.Hr51.adult_whole-fly_site-specific-recombination_insertion:FBgn0034012	ENCSR864SNW	Hr51	FBgn0034012	adult	adult	whole-fly	NA	adult.whole-fly	whole-fly,site-specific-recombination,insertion	remap2022_ENCSR864SNW.Hr51.adult_whole-fly_site-specific-recombination_insertion:FBgn0034012_ENCFF815OSU,remap2022_ENCSR864SNW.Hr51.adult_whole-fly_site-specific-recombination_insertion:FBgn0034012_ENCFF432FXX,remap2022_ENCSR864SNW.Hr51.adult_whole-fly_site-specific-recombination_insertion:FBgn0034012_ENCFF943JGK
ENCSR867MPT.toe.adult_whole-fly_site-specific-recombination_insertion:FBgn0036285	ENCSR867MPT	toe	FBgn0036285	adult	adult	whole-fly	NA	adult.whole-fly	whole-fly,site-specific-recombination,insertion	remap2022_ENCSR867MPT.toe.adult_whole-fly_site-specific-recombination_insertion:FBgn0036285_ENCFF934YBE,remap2022_ENCSR867MPT.toe.adult_whole-fly_site-specific-recombination_insertion:FBgn0036285_ENCFF812JYF
ENCSR867RUX.Su-var-2-HP2.adult_whole-fly_site-specific-recombination_insertion:FBgn0026427	ENCSR867RUX	Su-var-2-HP2	FBgn0026427	adult	adult	whole-fly	NA	adult.whole-fly	whole-fly,site-specific-recombination,insertion	remap2022_ENCSR867RUX.Su-var-2-HP2.adult_whole-fly_site-specific-recombination_insertion:FBgn0026427_ENCFF336XEG,remap2022_ENCSR867RUX.Su-var-2-HP2.adult_whole-fly_site-specific-recombination_insertion:FBgn0026427_ENCFF203KON
ENCSR869ZGG.TFAM.adult_whole-fly_site-specific-recombination_insertion:FBgn0038805	ENCSR869ZGG	TFAM	FBgn0038805	adult	adult	whole-fly	NA	adult.whole-fly	whole-fly,site-specific-recombination,insertion	remap2022_ENCSR869ZGG.TFAM.adult_whole-fly_site-specific-recombination_insertion:FBgn0038805_ENCFF416XRW,remap2022_ENCSR869ZGG.TFAM.adult_whole-fly_site-specific-recombination_insertion:FBgn0038805_ENCFF989OOT
ENCSR870BBY.fd59A.adult_whole-fly_site-specific-recombination_insertion:FBgn0004896	ENCSR870BBY	fd59A	FBgn0004896	adult	adult	whole-fly	NA	adult.whole-fly	whole-fly,site-specific-recombination,insertion	remap2022_ENCSR870BBY.fd59A.adult_whole-fly_site-specific-recombination_insertion:FBgn0004896_ENCFF516CRV,remap2022_ENCSR870BBY.fd59A.adult_whole-fly_site-specific-recombination_insertion:FBgn0004896_ENCFF220RTM
ENCSR870KTR.CG16815.adult_whole-fly_site-specific-recombination_insertion:FBgn0032491	ENCSR870KTR	CG16815	FBgn0032491	adult	adult	whole-fly	NA	adult.whole-fly	whole-fly,site-specific-recombination,insertion	remap2022_ENCSR870KTR.CG16815.adult_whole-fly_site-specific-recombination_insertion:FBgn0032491_ENCFF998PJS,remap2022_ENCSR870KTR.CG16815.adult_whole-fly_site-specific-recombination_insertion:FBgn0032491_ENCFF729FOL,remap2022_ENCSR870KTR.CG16815.adult_whole-fly_site-specific-recombination_insertion:FBgn0032491_ENCFF919NRB
ENCSR872ZXK.HLH54F.adult_whole-fly_site-specific-recombination_insertion:FBgn0022740	ENCSR872ZXK	HLH54F	FBgn0022740	adult	adult	whole-fly	NA	adult.whole-fly	whole-fly,site-specific-recombination,insertion	remap2022_ENCSR872ZXK.HLH54F.adult_whole-fly_site-specific-recombination_insertion:FBgn0022740_ENCFF729QGT,remap2022_ENCSR872ZXK.HLH54F.adult_whole-fly_site-specific-recombination_insertion:FBgn0022740_ENCFF013BJZ,remap2022_ENCSR872ZXK.HLH54F.adult_whole-fly_site-specific-recombination_insertion:FBgn0022740_ENCFF605SSD
ENCSR875FVD.Mad.adult_whole-fly_site-specific-recombination_insertion:FBgn0011648	ENCSR875FVD	Mad	FBgn0011648	adult	adult	whole-fly	NA	adult.whole-fly	whole-fly,site-specific-recombination,insertion	remap2022_ENCSR875FVD.Mad.adult_whole-fly_site-specific-recombination_insertion:FBgn0011648_ENCFF393IYJ,remap2022_ENCSR875FVD.Mad.adult_whole-fly_site-specific-recombination_insertion:FBgn0011648_ENCFF309OZV
ENCSR875UKH.CG9705.adult_whole-fly_site-specific-recombination_insertion:FBgn0036661	ENCSR875UKH	CG9705	FBgn0036661	adult	adult	whole-fly	NA	adult.whole-fly	whole-fly,site-specific-recombination,insertion	remap2022_ENCSR875UKH.CG9705.adult_whole-fly_site-specific-recombination_insertion:FBgn0036661_ENCFF971HEH,remap2022_ENCSR875UKH.CG9705.adult_whole-fly_site-specific-recombination_insertion:FBgn0036661_ENCFF821YFP
ENCSR878RMZ.HHEX.adult_whole-fly_site-specific-recombination_insertion:FBgn0038852	ENCSR878RMZ	HHEX	FBgn0038852	adult	adult	whole-fly	NA	adult.whole-fly	whole-fly,site-specific-recombination,insertion	remap2022_ENCSR878RMZ.HHEX.adult_whole-fly_site-specific-recombination_insertion:FBgn0038852_ENCFF745XEK,remap2022_ENCSR878RMZ.HHEX.adult_whole-fly_site-specific-recombination_insertion:FBgn0038852_ENCFF558FAH,remap2022_ENCSR878RMZ.HHEX.adult_whole-fly_site-specific-recombination_insertion:FBgn0038852_ENCFF565IAQ
ENCSR888UWA.bab1.adult_whole-fly_site-specific-recombination_insertion:FBgn0004870	ENCSR888UWA	bab1	FBgn0004870	adult	adult	whole-fly	NA	adult.whole-fly	whole-fly,site-specific-recombination,insertion	remap2022_ENCSR888UWA.bab1.adult_whole-fly_site-specific-recombination_insertion:FBgn0004870_ENCFF512MRG,remap2022_ENCSR888UWA.bab1.adult_whole-fly_site-specific-recombination_insertion:FBgn0004870_ENCFF357ZUC,remap2022_ENCSR888UWA.bab1.adult_whole-fly_site-specific-recombination_insertion:FBgn0004870_ENCFF345XRE
ENCSR890AWM.CG17359.adult_whole-fly_site-specific-recombination_insertion:FBgn0036396	ENCSR890AWM	CG17359	FBgn0036396	adult	adult	whole-fly	NA	adult.whole-fly	whole-fly,site-specific-recombination,insertion	remap2022_ENCSR890AWM.CG17359.adult_whole-fly_site-specific-recombination_insertion:FBgn0036396_ENCFF357EMT,remap2022_ENCSR890AWM.CG17359.adult_whole-fly_site-specific-recombination_insertion:FBgn0036396_ENCFF816WKJ,remap2022_ENCSR890AWM.CG17359.adult_whole-fly_site-specific-recombination_insertion:FBgn0036396_ENCFF615EYF
ENCSR890OUH.lz.adult_whole-fly_site-specific-recombination_insertion:FBgn0002576	ENCSR890OUH	lz	FBgn0002576	adult	adult	whole-fly	NA	adult.whole-fly	whole-fly,site-specific-recombination,insertion	remap2022_ENCSR890OUH.lz.adult_whole-fly_site-specific-recombination_insertion:FBgn0002576_ENCFF578ISX,remap2022_ENCSR890OUH.lz.adult_whole-fly_site-specific-recombination_insertion:FBgn0002576_ENCFF142PAS,remap2022_ENCSR890OUH.lz.adult_whole-fly_site-specific-recombination_insertion:FBgn0002576_ENCFF360KID
ENCSR891UUT.CG3838.adult_whole-fly_site-specific-recombination_insertion:FBgn0032130	ENCSR891UUT	CG3838	FBgn0032130	adult	adult	whole-fly	NA	adult.whole-fly	whole-fly,site-specific-recombination,insertion	remap2022_ENCSR891UUT.CG3838.adult_whole-fly_site-specific-recombination_insertion:FBgn0032130_ENCFF918WBE,remap2022_ENCSR891UUT.CG3838.adult_whole-fly_site-specific-recombination_insertion:FBgn0032130_ENCFF709FZZ,remap2022_ENCSR891UUT.CG3838.adult_whole-fly_site-specific-recombination_insertion:FBgn0032130_ENCFF565ESU
ENCSR893CTZ.ss.adult_whole-fly_site-specific-recombination_insertion:FBgn0003513	ENCSR893CTZ	ss	FBgn0003513	adult	adult	whole-fly	NA	adult.whole-fly	whole-fly,site-specific-recombination,insertion	remap2022_ENCSR893CTZ.ss.adult_whole-fly_site-specific-recombination_insertion:FBgn0003513_ENCFF155EVF,remap2022_ENCSR893CTZ.ss.adult_whole-fly_site-specific-recombination_insertion:FBgn0003513_ENCFF845EDY,remap2022_ENCSR893CTZ.ss.adult_whole-fly_site-specific-recombination_insertion:FBgn0003513_ENCFF724CQJ
ENCSR894GQA.D.adult_whole-fly_site-specific-recombination_insertion:FBgn0000411	ENCSR894GQA	D	FBgn0000411	adult	adult	whole-fly	NA	adult.whole-fly	whole-fly,site-specific-recombination,insertion	remap2022_ENCSR894GQA.D.adult_whole-fly_site-specific-recombination_insertion:FBgn0000411_ENCFF763TPN,remap2022_ENCSR894GQA.D.adult_whole-fly_site-specific-recombination_insertion:FBgn0000411_ENCFF507ULD,remap2022_ENCSR894GQA.D.adult_whole-fly_site-specific-recombination_insertion:FBgn0000411_ENCFF734FNT
ENCSR896OQW.ZnT49B.adult_whole-fly_site-specific-recombination_insertion:FBgn0033762	ENCSR896OQW	ZnT49B	FBgn0033762	adult	adult	whole-fly	NA	adult.whole-fly	whole-fly,site-specific-recombination,insertion	remap2022_ENCSR896OQW.ZnT49B.adult_whole-fly_site-specific-recombination_insertion:FBgn0033762_ENCFF274WCP,remap2022_ENCSR896OQW.ZnT49B.adult_whole-fly_site-specific-recombination_insertion:FBgn0033762_ENCFF713DAQ,remap2022_ENCSR896OQW.ZnT49B.adult_whole-fly_site-specific-recombination_insertion:FBgn0033762_ENCFF368DCF
ENCSR900SLE.dmrt93B.adult_whole-fly_site-specific-recombination_insertion:FBgn0038851	ENCSR900SLE	dmrt93B	FBgn0038851	adult	adult	whole-fly	NA	adult.whole-fly	whole-fly,site-specific-recombination,insertion	remap2022_ENCSR900SLE.dmrt93B.adult_whole-fly_site-specific-recombination_insertion:FBgn0038851_ENCFF131MZA,remap2022_ENCSR900SLE.dmrt93B.adult_whole-fly_site-specific-recombination_insertion:FBgn0038851_ENCFF703TVS,remap2022_ENCSR900SLE.dmrt93B.adult_whole-fly_site-specific-recombination_insertion:FBgn0038851_ENCFF188LLD
ENCSR900TNL.cwo.adult_whole-fly_site-specific-recombination_insertion:FBgn0259938	ENCSR900TNL	cwo	FBgn0259938	adult	adult	whole-fly	NA	adult.whole-fly	whole-fly,site-specific-recombination,insertion	remap2022_ENCSR900TNL.cwo.adult_whole-fly_site-specific-recombination_insertion:FBgn0259938_ENCFF651HOW,remap2022_ENCSR900TNL.cwo.adult_whole-fly_site-specific-recombination_insertion:FBgn0259938_ENCFF133CFL,remap2022_ENCSR900TNL.cwo.adult_whole-fly_site-specific-recombination_insertion:FBgn0259938_ENCFF469REE
ENCSR903DUB.psq.adult_whole-fly_site-specific-recombination_insertion:FBgn0263102	ENCSR903DUB	psq	FBgn0263102	adult	adult	whole-fly	NA	adult.whole-fly	whole-fly,site-specific-recombination,insertion	remap2022_ENCSR903DUB.psq.adult_whole-fly_site-specific-recombination_insertion:FBgn0263102_ENCFF481LIN,remap2022_ENCSR903DUB.psq.adult_whole-fly_site-specific-recombination_insertion:FBgn0263102_ENCFF140WPC,remap2022_ENCSR903DUB.psq.adult_whole-fly_site-specific-recombination_insertion:FBgn0263102_ENCFF660OWR
ENCSR904ALL.ERR.adult_whole-fly_site-specific-recombination_insertion:FBgn0035849	ENCSR904ALL	ERR	FBgn0035849	adult	adult	whole-fly	NA	adult.whole-fly	whole-fly,site-specific-recombination,insertion	remap2022_ENCSR904ALL.ERR.adult_whole-fly_site-specific-recombination_insertion:FBgn0035849_ENCFF279CRU,remap2022_ENCSR904ALL.ERR.adult_whole-fly_site-specific-recombination_insertion:FBgn0035849_ENCFF813PEZ
ENCSR904GFO.Clk.adult_whole-fly_site-specific-recombination_insertion:FBgn0023076	ENCSR904GFO	Clk	FBgn0023076	adult	adult	whole-fly	NA	adult.whole-fly	whole-fly,site-specific-recombination,insertion	remap2022_ENCSR904GFO.Clk.adult_whole-fly_site-specific-recombination_insertion:FBgn0023076_ENCFF323BSN,remap2022_ENCSR904GFO.Clk.adult_whole-fly_site-specific-recombination_insertion:FBgn0023076_ENCFF969YVU
ENCSR907HKG.CG7839.adult_whole-fly_site-specific-recombination_insertion:FBgn0036124	ENCSR907HKG	CG7839	FBgn0036124	adult	adult	whole-fly	NA	adult.whole-fly	whole-fly,site-specific-recombination,insertion	remap2022_ENCSR907HKG.CG7839.adult_whole-fly_site-specific-recombination_insertion:FBgn0036124_ENCFF126MBW,remap2022_ENCSR907HKG.CG7839.adult_whole-fly_site-specific-recombination_insertion:FBgn0036124_ENCFF590KFF,remap2022_ENCSR907HKG.CG7839.adult_whole-fly_site-specific-recombination_insertion:FBgn0036124_ENCFF357QRS
ENCSR909HKS.noc.adult_whole-fly_site-specific-recombination_insertion:FBgn0005771	ENCSR909HKS	noc	FBgn0005771	adult	adult	whole-fly	NA	adult.whole-fly	whole-fly,site-specific-recombination,insertion	remap2022_ENCSR909HKS.noc.adult_whole-fly_site-specific-recombination_insertion:FBgn0005771_ENCFF712FKU,remap2022_ENCSR909HKS.noc.adult_whole-fly_site-specific-recombination_insertion:FBgn0005771_ENCFF837VJI,remap2022_ENCSR909HKS.noc.adult_whole-fly_site-specific-recombination_insertion:FBgn0005771_ENCFF181XOC
ENCSR909QHH.grn.adult_whole-fly_site-specific-recombination_insertion:FBgn0001138	ENCSR909QHH	grn	FBgn0001138	adult	adult	whole-fly	NA	adult.whole-fly	whole-fly,site-specific-recombination,insertion	remap2022_ENCSR909QHH.grn.adult_whole-fly_site-specific-recombination_insertion:FBgn0001138_ENCFF229HVV,remap2022_ENCSR909QHH.grn.adult_whole-fly_site-specific-recombination_insertion:FBgn0001138_ENCFF081AMU,remap2022_ENCSR909QHH.grn.adult_whole-fly_site-specific-recombination_insertion:FBgn0001138_ENCFF547NLI
ENCSR909WNS.br.adult_whole-fly:FBgn0283451	ENCSR909WNS	br	FBgn0283451	adult	adult	whole-fly	NA	adult.whole-fly	whole-fly	remap2022_ENCSR909WNS.br.adult_whole-fly:FBgn0283451_ENCFF184GUS,remap2022_ENCSR909WNS.br.adult_whole-fly:FBgn0283451_ENCFF379WSB
ENCSR909XXF.PHDP.adult_whole-fly_site-specific-recombination_insertion:FBgn0025334	ENCSR909XXF	PHDP	FBgn0025334	adult	adult	whole-fly	NA	adult.whole-fly	whole-fly,site-specific-recombination,insertion	remap2022_ENCSR909XXF.PHDP.adult_whole-fly_site-specific-recombination_insertion:FBgn0025334_ENCFF138NSL,remap2022_ENCSR909XXF.PHDP.adult_whole-fly_site-specific-recombination_insertion:FBgn0025334_ENCFF317UWU,remap2022_ENCSR909XXF.PHDP.adult_whole-fly_site-specific-recombination_insertion:FBgn0025334_ENCFF616KEN
ENCSR918GXT.CTCF.Schneider-2:FBgn0035769	ENCSR918GXT	CTCF	FBgn0035769	Schneider-2:FBgn0035769	S2	S2	NA	S2		remap2022_ENCSR918GXT.CTCF.Schneider-2:FBgn0035769_ENCFF256WRP,remap2022_ENCSR918GXT.CTCF.Schneider-2:FBgn0035769_ENCFF127RRR
ENCSR919WAW.CG11902.adult_whole-fly_site-specific-recombination_insertion:FBgn0028647	ENCSR919WAW	CG11902	FBgn0028647	adult	adult	whole-fly	NA	adult.whole-fly	whole-fly,site-specific-recombination,insertion	remap2022_ENCSR919WAW.CG11902.adult_whole-fly_site-specific-recombination_insertion:FBgn0028647_ENCFF425XAX,remap2022_ENCSR919WAW.CG11902.adult_whole-fly_site-specific-recombination_insertion:FBgn0028647_ENCFF086BBS,remap2022_ENCSR919WAW.CG11902.adult_whole-fly_site-specific-recombination_insertion:FBgn0028647_ENCFF832OFI,remap2022_ENCSR919WAW.CG11902.adult_whole-fly_site-specific-recombination_i…
ENCSR923RDP.CG12768.adult_whole-fly_site-specific-recombination_insertion:FBgn0037206	ENCSR923RDP	CG12768	FBgn0037206	adult	adult	whole-fly	NA	adult.whole-fly	whole-fly,site-specific-recombination,insertion	remap2022_ENCSR923RDP.CG12768.adult_whole-fly_site-specific-recombination_insertion:FBgn0037206_ENCFF335KNW,remap2022_ENCSR923RDP.CG12768.adult_whole-fly_site-specific-recombination_insertion:FBgn0037206_ENCFF569SUQ
ENCSR923VWW.sqz.adult_whole-fly_site-specific-recombination_insertion:FBgn0010768	ENCSR923VWW	sqz	FBgn0010768	adult	adult	whole-fly	NA	adult.whole-fly	whole-fly,site-specific-recombination,insertion	remap2022_ENCSR923VWW.sqz.adult_whole-fly_site-specific-recombination_insertion:FBgn0010768_ENCFF156YTQ,remap2022_ENCSR923VWW.sqz.adult_whole-fly_site-specific-recombination_insertion:FBgn0010768_ENCFF008INY,remap2022_ENCSR923VWW.sqz.adult_whole-fly_site-specific-recombination_insertion:FBgn0010768_ENCFF320VKX
ENCSR924PXF.CG7271.adult_whole-fly_site-specific-recombination_insertion:FBgn0036791	ENCSR924PXF	CG7271	FBgn0036791	adult	adult	whole-fly	NA	adult.whole-fly	whole-fly,site-specific-recombination,insertion	remap2022_ENCSR924PXF.CG7271.adult_whole-fly_site-specific-recombination_insertion:FBgn0036791_ENCFF888TNV,remap2022_ENCSR924PXF.CG7271.adult_whole-fly_site-specific-recombination_insertion:FBgn0036791_ENCFF116PHN
ENCSR929RAT.E-var-3-9.adult_whole-fly_site-specific-recombination_insertion:FBgn0260243	ENCSR929RAT	E-var-3-9	FBgn0260243	adult	adult	whole-fly	NA	adult.whole-fly	whole-fly,site-specific-recombination,insertion	remap2022_ENCSR929RAT.E-var-3-9.adult_whole-fly_site-specific-recombination_insertion:FBgn0260243_ENCFF685CYE,remap2022_ENCSR929RAT.E-var-3-9.adult_whole-fly_site-specific-recombination_insertion:FBgn0260243_ENCFF959FGW
ENCSR931AHZ.ttk.Kc167:FBgn0003870	ENCSR931AHZ	ttk	FBgn0003870	Kc167:FBgn0003870	Kc	Kc	NA	Kc		remap2022_ENCSR931AHZ.ttk.Kc167:FBgn0003870_ENCFF973VHP,remap2022_ENCSR931AHZ.ttk.Kc167:FBgn0003870_ENCFF234GDQ
ENCSR932STL.Elba2.adult_whole-fly_site-specific-recombination_insertion:FBgn0031435	ENCSR932STL	Elba2	FBgn0031435	adult	adult	whole-fly	NA	adult.whole-fly	whole-fly,site-specific-recombination,insertion	remap2022_ENCSR932STL.Elba2.adult_whole-fly_site-specific-recombination_insertion:FBgn0031435_ENCFF635LCU,remap2022_ENCSR932STL.Elba2.adult_whole-fly_site-specific-recombination_insertion:FBgn0031435_ENCFF345QOO,remap2022_ENCSR932STL.Elba2.adult_whole-fly_site-specific-recombination_insertion:FBgn0031435_ENCFF444ICY
ENCSR933LXL.woc.adult_whole-fly_site-specific-recombination_insertion:FBgn0010328	ENCSR933LXL	woc	FBgn0010328	adult	adult	whole-fly	NA	adult.whole-fly	whole-fly,site-specific-recombination,insertion	remap2022_ENCSR933LXL.woc.adult_whole-fly_site-specific-recombination_insertion:FBgn0010328_ENCFF127JGQ,remap2022_ENCSR933LXL.woc.adult_whole-fly_site-specific-recombination_insertion:FBgn0010328_ENCFF107FLZ
ENCSR943QAF.salr.adult_whole-fly_site-specific-recombination_insertion:FBgn0000287	ENCSR943QAF	salr	FBgn0000287	adult	adult	whole-fly	NA	adult.whole-fly	whole-fly,site-specific-recombination,insertion	remap2022_ENCSR943QAF.salr.adult_whole-fly_site-specific-recombination_insertion:FBgn0000287_ENCFF168QGV,remap2022_ENCSR943QAF.salr.adult_whole-fly_site-specific-recombination_insertion:FBgn0000287_ENCFF037JFD,remap2022_ENCSR943QAF.salr.adult_whole-fly_site-specific-recombination_insertion:FBgn0000287_ENCFF481WLT
ENCSR944MGS.CG8281.adult_whole-fly_site-specific-recombination_insertion:FBgn0035824	ENCSR944MGS	CG8281	FBgn0035824	adult	adult	whole-fly	NA	adult.whole-fly	whole-fly,site-specific-recombination,insertion	remap2022_ENCSR944MGS.CG8281.adult_whole-fly_site-specific-recombination_insertion:FBgn0035824_ENCFF615RPO,remap2022_ENCSR944MGS.CG8281.adult_whole-fly_site-specific-recombination_insertion:FBgn0035824_ENCFF273ZMF
ENCSR945XEH.Pif1A.adult_whole-fly_site-specific-recombination_insertion:FBgn0261015	ENCSR945XEH	Pif1A	FBgn0261015	adult	adult	whole-fly	NA	adult.whole-fly	whole-fly,site-specific-recombination,insertion	remap2022_ENCSR945XEH.Pif1A.adult_whole-fly_site-specific-recombination_insertion:FBgn0261015_ENCFF649PFB,remap2022_ENCSR945XEH.Pif1A.adult_whole-fly_site-specific-recombination_insertion:FBgn0261015_ENCFF450NHT,remap2022_ENCSR945XEH.Pif1A.adult_whole-fly_site-specific-recombination_insertion:FBgn0261015_ENCFF674SKC
ENCSR946EAE.pb.adult_whole-fly_site-specific-recombination_insertion:FBgn0051481	ENCSR946EAE	pb	FBgn0051481	adult	adult	whole-fly	NA	adult.whole-fly	whole-fly,site-specific-recombination,insertion	remap2022_ENCSR946EAE.pb.adult_whole-fly_site-specific-recombination_insertion:FBgn0051481_ENCFF723MCZ,remap2022_ENCSR946EAE.pb.adult_whole-fly_site-specific-recombination_insertion:FBgn0051481_ENCFF517QTH,remap2022_ENCSR946EAE.pb.adult_whole-fly_site-specific-recombination_insertion:FBgn0051481_ENCFF962JZA
ENCSR946VDB.jumu.adult_whole-fly_site-specific-recombination_insertion:FBgn0015396	ENCSR946VDB	jumu	FBgn0015396	adult	adult	whole-fly	NA	adult.whole-fly	whole-fly,site-specific-recombination,insertion	remap2022_ENCSR946VDB.jumu.adult_whole-fly_site-specific-recombination_insertion:FBgn0015396_ENCFF808IQP,remap2022_ENCSR946VDB.jumu.adult_whole-fly_site-specific-recombination_insertion:FBgn0015396_ENCFF113MEO,remap2022_ENCSR946VDB.jumu.adult_whole-fly_site-specific-recombination_insertion:FBgn0015396_ENCFF605TRO
ENCSR948EEN.dmrt99B.adult_whole-fly_site-specific-recombination_insertion:FBgn0039683	ENCSR948EEN	dmrt99B	FBgn0039683	adult	adult	whole-fly	NA	adult.whole-fly	whole-fly,site-specific-recombination,insertion	remap2022_ENCSR948EEN.dmrt99B.adult_whole-fly_site-specific-recombination_insertion:FBgn0039683_ENCFF475TTQ,remap2022_ENCSR948EEN.dmrt99B.adult_whole-fly_site-specific-recombination_insertion:FBgn0039683_ENCFF107JLU
ENCSR948RHA.mam.adult_whole-fly_site-specific-recombination_insertion:FBgn0002643	ENCSR948RHA	mam	FBgn0002643	adult	adult	whole-fly	NA	adult.whole-fly	whole-fly,site-specific-recombination,insertion	remap2022_ENCSR948RHA.mam.adult_whole-fly_site-specific-recombination_insertion:FBgn0002643_ENCFF160ITX,remap2022_ENCSR948RHA.mam.adult_whole-fly_site-specific-recombination_insertion:FBgn0002643_ENCFF114IHP,remap2022_ENCSR948RHA.mam.adult_whole-fly_site-specific-recombination_insertion:FBgn0002643_ENCFF743FDM
ENCSR949RDZ.Myc.Kc167:FBgn0262656	ENCSR949RDZ	Myc	FBgn0262656	Kc167:FBgn0262656	Kc	Kc	NA	Kc		remap2022_ENCSR949RDZ.Myc.Kc167:FBgn0262656_ENCFF957ISH,remap2022_ENCSR949RDZ.Myc.Kc167:FBgn0262656_ENCFF014MOQ
ENCSR949XGL.chif.adult_whole-fly_site-specific-recombination_insertion:FBgn0000307	ENCSR949XGL	chif	FBgn0000307	adult	adult	whole-fly	NA	adult.whole-fly	whole-fly,site-specific-recombination,insertion	remap2022_ENCSR949XGL.chif.adult_whole-fly_site-specific-recombination_insertion:FBgn0000307_ENCFF600UBF,remap2022_ENCSR949XGL.chif.adult_whole-fly_site-specific-recombination_insertion:FBgn0000307_ENCFF384WUC,remap2022_ENCSR949XGL.chif.adult_whole-fly_site-specific-recombination_insertion:FBgn0000307_ENCFF224LMZ
ENCSR950LBC.CG12744.adult_whole-fly_site-specific-recombination_insertion:FBgn0033459	ENCSR950LBC	CG12744	FBgn0033459	adult	adult	whole-fly	NA	adult.whole-fly	whole-fly,site-specific-recombination,insertion	remap2022_ENCSR950LBC.CG12744.adult_whole-fly_site-specific-recombination_insertion:FBgn0033459_ENCFF934CQN,remap2022_ENCSR950LBC.CG12744.adult_whole-fly_site-specific-recombination_insertion:FBgn0033459_ENCFF619EDD
ENCSR951FDL.rgr.adult_whole-fly_site-specific-recombination_insertion:FBgn0267792	ENCSR951FDL	rgr	FBgn0267792	adult	adult	whole-fly	NA	adult.whole-fly	whole-fly,site-specific-recombination,insertion	remap2022_ENCSR951FDL.rgr.adult_whole-fly_site-specific-recombination_insertion:FBgn0267792_ENCFF640KBX,remap2022_ENCSR951FDL.rgr.adult_whole-fly_site-specific-recombination_insertion:FBgn0267792_ENCFF491QKT,remap2022_ENCSR951FDL.rgr.adult_whole-fly_site-specific-recombination_insertion:FBgn0267792_ENCFF616IYP
ENCSR952TDU.en.adult_whole-fly_site-specific-recombination_insertion:FBgn0000577	ENCSR952TDU	en	FBgn0000577	adult	adult	whole-fly	NA	adult.whole-fly	whole-fly,site-specific-recombination,insertion	remap2022_ENCSR952TDU.en.adult_whole-fly_site-specific-recombination_insertion:FBgn0000577_ENCFF643CJO,remap2022_ENCSR952TDU.en.adult_whole-fly_site-specific-recombination_insertion:FBgn0000577_ENCFF860ZUN
ENCSR957HDY.ADD1.adult_whole-fly_site-specific-recombination_insertion:FBgn0026573	ENCSR957HDY	ADD1	FBgn0026573	adult	adult	whole-fly	NA	adult.whole-fly	whole-fly,site-specific-recombination,insertion	remap2022_ENCSR957HDY.ADD1.adult_whole-fly_site-specific-recombination_insertion:FBgn0026573_ENCFF610VFE,remap2022_ENCSR957HDY.ADD1.adult_whole-fly_site-specific-recombination_insertion:FBgn0026573_ENCFF781YZU
ENCSR957XDI.CG18764.adult_whole-fly_site-specific-recombination_insertion:FBgn0042205	ENCSR957XDI	CG18764	FBgn0042205	adult	adult	whole-fly	NA	adult.whole-fly	whole-fly,site-specific-recombination,insertion	remap2022_ENCSR957XDI.CG18764.adult_whole-fly_site-specific-recombination_insertion:FBgn0042205_ENCFF896BEB,remap2022_ENCSR957XDI.CG18764.adult_whole-fly_site-specific-recombination_insertion:FBgn0042205_ENCFF248JBC,remap2022_ENCSR957XDI.CG18764.adult_whole-fly_site-specific-recombination_insertion:FBgn0042205_ENCFF847KNF
ENCSR959SWC.achi.adult_whole-fly_site-specific-recombination_insertion:FBgn0033749	ENCSR959SWC	achi	FBgn0033749	adult	adult	whole-fly	NA	adult.whole-fly	whole-fly,site-specific-recombination,insertion	remap2022_ENCSR959SWC.achi.adult_whole-fly_site-specific-recombination_insertion:FBgn0033749_ENCFF979YUJ,remap2022_ENCSR959SWC.achi.adult_whole-fly_site-specific-recombination_insertion:FBgn0033749_ENCFF721FQK,remap2022_ENCSR959SWC.achi.adult_whole-fly_site-specific-recombination_insertion:FBgn0033749_ENCFF881ITO
ENCSR961TSV.CG5245.adult_whole-fly_site-specific-recombination_insertion:FBgn0038047	ENCSR961TSV	CG5245	FBgn0038047	adult	adult	whole-fly	NA	adult.whole-fly	whole-fly,site-specific-recombination,insertion	remap2022_ENCSR961TSV.CG5245.adult_whole-fly_site-specific-recombination_insertion:FBgn0038047_ENCFF917LFY,remap2022_ENCSR961TSV.CG5245.adult_whole-fly_site-specific-recombination_insertion:FBgn0038047_ENCFF423VBE,remap2022_ENCSR961TSV.CG5245.adult_whole-fly_site-specific-recombination_insertion:FBgn0038047_ENCFF480VBJ
ENCSR963YPQ.Atf-2.adult_whole-fly_site-specific-recombination_insertion:FBgn0265193	ENCSR963YPQ	Atf-2	FBgn0265193	adult	adult	whole-fly	NA	adult.whole-fly	whole-fly,site-specific-recombination,insertion	remap2022_ENCSR963YPQ.Atf-2.adult_whole-fly_site-specific-recombination_insertion:FBgn0265193_ENCFF922ADL,remap2022_ENCSR963YPQ.Atf-2.adult_whole-fly_site-specific-recombination_insertion:FBgn0265193_ENCFF020KMR
ENCSR964LIH.Su-var-3-9.adult_whole-fly:FBgn0263755	ENCSR964LIH	Su-var-3-9	FBgn0263755	adult	adult	whole-fly	NA	adult.whole-fly	whole-fly	remap2022_ENCSR964LIH.Su-var-3-9.adult_whole-fly:FBgn0263755_ENCFF190EFF,remap2022_ENCSR964LIH.Su-var-3-9.adult_whole-fly:FBgn0263755_ENCFF568FLU
ENCSR964YKJ.CG12769.adult_whole-fly_site-specific-recombination_insertion:FBgn0033252	ENCSR964YKJ	CG12769	FBgn0033252	adult	adult	whole-fly	NA	adult.whole-fly	whole-fly,site-specific-recombination,insertion	remap2022_ENCSR964YKJ.CG12769.adult_whole-fly_site-specific-recombination_insertion:FBgn0033252_ENCFF970GLM,remap2022_ENCSR964YKJ.CG12769.adult_whole-fly_site-specific-recombination_insertion:FBgn0033252_ENCFF280WTH
ENCSR965GGK.CG32264.adult_whole-fly_site-specific-recombination_insertion:FBgn0052264	ENCSR965GGK	CG32264	FBgn0052264	adult	adult	whole-fly	NA	adult.whole-fly	whole-fly,site-specific-recombination,insertion	remap2022_ENCSR965GGK.CG32264.adult_whole-fly_site-specific-recombination_insertion:FBgn0052264_ENCFF139PXO,remap2022_ENCSR965GGK.CG32264.adult_whole-fly_site-specific-recombination_insertion:FBgn0052264_ENCFF071VRV
ENCSR965XSS.hng1.adult_whole-fly_site-specific-recombination_insertion:FBgn0034599	ENCSR965XSS	hng1	FBgn0034599	adult	adult	whole-fly	NA	adult.whole-fly	whole-fly,site-specific-recombination,insertion	remap2022_ENCSR965XSS.hng1.adult_whole-fly_site-specific-recombination_insertion:FBgn0034599_ENCFF818DJQ,remap2022_ENCSR965XSS.hng1.adult_whole-fly_site-specific-recombination_insertion:FBgn0034599_ENCFF432EZU
ENCSR968GUV.CG10669.adult_whole-fly_site-specific-recombination_insertion:FBgn0039329	ENCSR968GUV	CG10669	FBgn0039329	adult	adult	whole-fly	NA	adult.whole-fly	whole-fly,site-specific-recombination,insertion	remap2022_ENCSR968GUV.CG10669.adult_whole-fly_site-specific-recombination_insertion:FBgn0039329_ENCFF264VXH,remap2022_ENCSR968GUV.CG10669.adult_whole-fly_site-specific-recombination_insertion:FBgn0039329_ENCFF117DPQ,remap2022_ENCSR968GUV.CG10669.adult_whole-fly_site-specific-recombination_insertion:FBgn0039329_ENCFF602OXI
ENCSR969SUB.Eip93F.adult_whole-fly_site-specific-recombination_insertion:FBgn0264490	ENCSR969SUB	Eip93F	FBgn0264490	adult	adult	whole-fly	NA	adult.whole-fly	whole-fly,site-specific-recombination,insertion	remap2022_ENCSR969SUB.Eip93F.adult_whole-fly_site-specific-recombination_insertion:FBgn0264490_ENCFF103QLO,remap2022_ENCSR969SUB.Eip93F.adult_whole-fly_site-specific-recombination_insertion:FBgn0264490_ENCFF059CRJ
ENCSR969UGO.Dad.adult_whole-fly_site-specific-recombination_insertion:FBgn0020493	ENCSR969UGO	Dad	FBgn0020493	adult	adult	whole-fly	NA	adult.whole-fly	whole-fly,site-specific-recombination,insertion	remap2022_ENCSR969UGO.Dad.adult_whole-fly_site-specific-recombination_insertion:FBgn0020493_ENCFF178LKS,remap2022_ENCSR969UGO.Dad.adult_whole-fly_site-specific-recombination_insertion:FBgn0020493_ENCFF948WMD,remap2022_ENCSR969UGO.Dad.adult_whole-fly_site-specific-recombination_insertion:FBgn0020493_ENCFF253WEN
ENCSR972RZE.sens.adult_whole-fly_site-specific-recombination_insertion:FBgn0002573	ENCSR972RZE	sens	FBgn0002573	adult	adult	whole-fly	NA	adult.whole-fly	whole-fly,site-specific-recombination,insertion	remap2022_ENCSR972RZE.sens.adult_whole-fly_site-specific-recombination_insertion:FBgn0002573_ENCFF889SPR,remap2022_ENCSR972RZE.sens.adult_whole-fly_site-specific-recombination_insertion:FBgn0002573_ENCFF076GTG,remap2022_ENCSR972RZE.sens.adult_whole-fly_site-specific-recombination_insertion:FBgn0002573_ENCFF435YIT,remap2022_ENCSR972RZE.sens.adult_whole-fly_site-specific-recombination_insertion:FBg…
ENCSR973GNK.zen.adult_whole-fly_site-specific-recombination_insertion:FBgn0004053	ENCSR973GNK	zen	FBgn0004053	adult	adult	whole-fly	NA	adult.whole-fly	whole-fly,site-specific-recombination,insertion	remap2022_ENCSR973GNK.zen.adult_whole-fly_site-specific-recombination_insertion:FBgn0004053_ENCFF022EBY,remap2022_ENCSR973GNK.zen.adult_whole-fly_site-specific-recombination_insertion:FBgn0004053_ENCFF565KZX,remap2022_ENCSR973GNK.zen.adult_whole-fly_site-specific-recombination_insertion:FBgn0004053_ENCFF912KCK
ENCSR974OVB.exex.adult_whole-fly_site-specific-recombination_insertion:FBgn0041156	ENCSR974OVB	exex	FBgn0041156	adult	adult	whole-fly	NA	adult.whole-fly	whole-fly,site-specific-recombination,insertion	remap2022_ENCSR974OVB.exex.adult_whole-fly_site-specific-recombination_insertion:FBgn0041156_ENCFF437EJI,remap2022_ENCSR974OVB.exex.adult_whole-fly_site-specific-recombination_insertion:FBgn0041156_ENCFF194WKM,remap2022_ENCSR974OVB.exex.adult_whole-fly_site-specific-recombination_insertion:FBgn0041156_ENCFF369TRI,remap2022_ENCSR974OVB.exex.adult_whole-fly_site-specific-recombination_insertion:FBg…
ENCSR976PEM.Sin3A.adult_whole-fly:FBgn0022764	ENCSR976PEM	Sin3A	FBgn0022764	adult	adult	whole-fly	NA	adult.whole-fly	whole-fly	remap2022_ENCSR976PEM.Sin3A.adult_whole-fly:FBgn0022764_ENCFF960AKF,remap2022_ENCSR976PEM.Sin3A.adult_whole-fly:FBgn0022764_ENCFF266SXZ
ENCSR978CMG.esn.adult_whole-fly_site-specific-recombination_insertion:FBgn0263934	ENCSR978CMG	esn	FBgn0263934	adult	adult	whole-fly	NA	adult.whole-fly	whole-fly,site-specific-recombination,insertion	remap2022_ENCSR978CMG.esn.adult_whole-fly_site-specific-recombination_insertion:FBgn0263934_ENCFF075GXI,remap2022_ENCSR978CMG.esn.adult_whole-fly_site-specific-recombination_insertion:FBgn0263934_ENCFF348OSJ
ENCSR978WED.jim.adult_whole-fly_site-specific-recombination_insertion:FBgn0027339	ENCSR978WED	jim	FBgn0027339	adult	adult	whole-fly	NA	adult.whole-fly	whole-fly,site-specific-recombination,insertion	remap2022_ENCSR978WED.jim.adult_whole-fly_site-specific-recombination_insertion:FBgn0027339_ENCFF333NEJ,remap2022_ENCSR978WED.jim.adult_whole-fly_site-specific-recombination_insertion:FBgn0027339_ENCFF969EHB
ENCSR978WWC.tHMG1.adult_whole-fly_site-specific-recombination_insertion:FBgn0038978	ENCSR978WWC	tHMG1	FBgn0038978	adult	adult	whole-fly	NA	adult.whole-fly	whole-fly,site-specific-recombination,insertion	remap2022_ENCSR978WWC.tHMG1.adult_whole-fly_site-specific-recombination_insertion:FBgn0038978_ENCFF488OWJ,remap2022_ENCSR978WWC.tHMG1.adult_whole-fly_site-specific-recombination_insertion:FBgn0038978_ENCFF486PCP
ENCSR981DLO.gro.adult_whole-fly_site-specific-recombination_insertion:FBgn0001139	ENCSR981DLO	gro	FBgn0001139	adult	adult	whole-fly	NA	adult.whole-fly	whole-fly,site-specific-recombination,insertion	remap2022_ENCSR981DLO.gro.adult_whole-fly_site-specific-recombination_insertion:FBgn0001139_ENCFF373ZES,remap2022_ENCSR981DLO.gro.adult_whole-fly_site-specific-recombination_insertion:FBgn0001139_ENCFF217IEH
ENCSR982KSB.CG8478.Schneider-2:FBgn0037746	ENCSR982KSB	CG8478	FBgn0037746	Schneider-2:FBgn0037746	S2	S2	NA	S2		remap2022_ENCSR982KSB.CG8478.Schneider-2:FBgn0037746_ENCFF800YKU,remap2022_ENCSR982KSB.CG8478.Schneider-2:FBgn0037746_ENCFF715CYF
ENCSR982LVI.Hr39.adult_whole-fly_site-specific-recombination_insertion:FBgn0261239	ENCSR982LVI	Hr39	FBgn0261239	adult	adult	whole-fly	NA	adult.whole-fly	whole-fly,site-specific-recombination,insertion	remap2022_ENCSR982LVI.Hr39.adult_whole-fly_site-specific-recombination_insertion:FBgn0261239_ENCFF483QRU,remap2022_ENCSR982LVI.Hr39.adult_whole-fly_site-specific-recombination_insertion:FBgn0261239_ENCFF398MZM,remap2022_ENCSR982LVI.Hr39.adult_whole-fly_site-specific-recombination_insertion:FBgn0261239_ENCFF472HZT
ENCSR982RGH.CG13123.adult_whole-fly_site-specific-recombination_insertion:FBgn0032150	ENCSR982RGH	CG13123	FBgn0032150	adult	adult	whole-fly	NA	adult.whole-fly	whole-fly,site-specific-recombination,insertion	remap2022_ENCSR982RGH.CG13123.adult_whole-fly_site-specific-recombination_insertion:FBgn0032150_ENCFF325ALB,remap2022_ENCSR982RGH.CG13123.adult_whole-fly_site-specific-recombination_insertion:FBgn0032150_ENCFF551ZZU
ENCSR984IRI.lola.adult_whole-fly_insertion:FBgn0283521	ENCSR984IRI	lola	FBgn0283521	adult	adult	whole-fly	NA	adult.whole-fly	whole-fly,insertion	remap2022_ENCSR984IRI.lola.adult_whole-fly_insertion:FBgn0283521_ENCFF401DVQ,remap2022_ENCSR984IRI.lola.adult_whole-fly_insertion:FBgn0283521_ENCFF004IMW
ENCSR985TNB.foxo.adult_whole-fly_site-specific-recombination_insertion:FBgn0038197	ENCSR985TNB	foxo	FBgn0038197	adult	adult	whole-fly	NA	adult.whole-fly	whole-fly,site-specific-recombination,insertion	remap2022_ENCSR985TNB.foxo.adult_whole-fly_site-specific-recombination_insertion:FBgn0038197_ENCFF496AUM,remap2022_ENCSR985TNB.foxo.adult_whole-fly_site-specific-recombination_insertion:FBgn0038197_ENCFF638SZR,remap2022_ENCSR985TNB.foxo.adult_whole-fly_site-specific-recombination_insertion:FBgn0038197_ENCFF502PWQ,remap2022_ENCSR985TNB.foxo.adult_whole-fly_site-specific-recombination_insertion:FBg…
ENCSR989SYT.insv.Kc167:FBgn0031434	ENCSR989SYT	insv	FBgn0031434	Kc167:FBgn0031434	Kc	Kc	NA	Kc		remap2022_ENCSR989SYT.insv.Kc167:FBgn0031434_ENCFF813DUB,remap2022_ENCSR989SYT.insv.Kc167:FBgn0031434_ENCFF414EHZ,remap2022_ENCSR989SYT.insv.Kc167:FBgn0031434_ENCFF553ZFV
ENCSR990VZW.lab.adult_whole-fly_site-specific-recombination_insertion:FBgn0002522	ENCSR990VZW	lab	FBgn0002522	adult	adult	whole-fly	NA	adult.whole-fly	whole-fly,site-specific-recombination,insertion	remap2022_ENCSR990VZW.lab.adult_whole-fly_site-specific-recombination_insertion:FBgn0002522_ENCFF886EWF,remap2022_ENCSR990VZW.lab.adult_whole-fly_site-specific-recombination_insertion:FBgn0002522_ENCFF594CVM,remap2022_ENCSR990VZW.lab.adult_whole-fly_site-specific-recombination_insertion:FBgn0002522_ENCFF160BJL
ENCSR997UIM.pnt.adult_whole-fly_site-specific-recombination_insertion:FBgn0003118	ENCSR997UIM	pnt	FBgn0003118	adult	adult	whole-fly	NA	adult.whole-fly	whole-fly,site-specific-recombination,insertion	remap2022_ENCSR997UIM.pnt.adult_whole-fly_site-specific-recombination_insertion:FBgn0003118_ENCFF785OXH,remap2022_ENCSR997UIM.pnt.adult_whole-fly_site-specific-recombination_insertion:FBgn0003118_ENCFF601VET,remap2022_ENCSR997UIM.pnt.adult_whole-fly_site-specific-recombination_insertion:FBgn0003118_ENCFF884ZLO
ENCSR998ZQZ.usp.adult_whole-fly_insertion:FBgn0003964	ENCSR998ZQZ	usp	FBgn0003964	adult	adult	whole-fly	NA	adult.whole-fly	whole-fly,insertion	remap2022_ENCSR998ZQZ.usp.adult_whole-fly_insertion:FBgn0003964_ENCFF008EGS,remap2022_ENCSR998ZQZ.usp.adult_whole-fly_insertion:FBgn0003964_ENCFF357EAH
ENCSR999ZCR.Myc.adult_whole-fly_site-specific-recombination_insertion:FBgn0262656	ENCSR999ZCR	Myc	FBgn0262656	adult	adult	whole-fly	NA	adult.whole-fly	whole-fly,site-specific-recombination,insertion	remap2022_ENCSR999ZCR.Myc.adult_whole-fly_site-specific-recombination_insertion:FBgn0262656_ENCFF182UJH,remap2022_ENCSR999ZCR.Myc.adult_whole-fly_site-specific-recombination_insertion:FBgn0262656_ENCFF719VBI,remap2022_ENCSR999ZCR.Myc.adult_whole-fly_site-specific-recombination_insertion:FBgn0262656_ENCFF816IMQ
GSE101365.AGO2.Kc167:FBgn0087035	GSE101365	AGO2	FBgn0087035	Kc167:FBgn0087035	Kc	Kc	NA	Kc		remap2022_GSE101365.AGO2.Kc167:FBgn0087035_SRR5832216,remap2022_GSE101365.AGO2.Kc167:FBgn0087035_SRR5832217	remap2022_GSE101365.Input.AGO2.Kc167:FBgn0087035_SRR5832220,remap2022_GSE101365.Input.AGO2.Kc167:FBgn0087035_SRR5832221
GSE101365.AGO2.Kc167_dslaminb:FBgn0087035	GSE101365	AGO2	FBgn0087035	Kc167	Kc	Kc	NA	Kc	dslaminb	remap2022_GSE101365.AGO2.Kc167_dslaminb:FBgn0087035_SRR5832218,remap2022_GSE101365.AGO2.Kc167_dslaminb:FBgn0087035_SRR5832219	remap2022_GSE101365.Input.AGO2.Kc167_dslaminb:FBgn0087035_SRR5832222,remap2022_GSE101365.Input.AGO2.Kc167_dslaminb:FBgn0087035_SRR5832223
GSE101554.E-z.S2-DRSC_SC-dN-20:FBgn0000629	GSE101554	E-z	FBgn0000629	S2-DRSC	S2	S2	NA	S2	SC-dN-20	remap2022_GSE101554.E-z.S2-DRSC_SC-dN-20:FBgn0000629_SRR5834726,remap2022_GSE101554.E-z.S2-DRSC_SC-dN-20:FBgn0000629_SRR5834727	remap2022_GSE101554.Input.E-z.S2-DRSC_SC-dN-20:FBgn0000629_SRR5834731,remap2022_GSE101554.Input.E-z.S2-DRSC_SC-dN-20:FBgn0000629_SRR5834732
GSE101554.E-z.S2-DRSC_abd-A-HA_SC-dN-20:FBgn0000629	GSE101554	E-z	FBgn0000629	S2-DRSC	S2	S2	NA	S2	abd-A-HA,SC-dN-20	remap2022_GSE101554.E-z.S2-DRSC_abd-A-HA_SC-dN-20:FBgn0000629_SRR5834728,remap2022_GSE101554.E-z.S2-DRSC_abd-A-HA_SC-dN-20:FBgn0000629_SRR5834729	remap2022_GSE101554.Input.E-z.S2-DRSC_abd-A-HA_SC-dN-20:FBgn0000629_SRR5834734,remap2022_GSE101554.Input.E-z.S2-DRSC_abd-A-HA_SC-dN-20:FBgn0000629_SRR5834735
GSE101554.M1BP.S2-DRSC:FBgn0037621	GSE101554	M1BP	FBgn0037621	S2-DRSC:FBgn0037621	S2	S2	NA	S2		remap2022_GSE101554.M1BP.S2-DRSC:FBgn0037621_SRR5834714,remap2022_GSE101554.M1BP.S2-DRSC:FBgn0037621_SRR5834715	remap2022_GSE101554.Input.M1BP.S2-DRSC:FBgn0037621_SRR5834731,remap2022_GSE101554.Input.M1BP.S2-DRSC:FBgn0037621_SRR5834732
GSE101554.M1BP.S2-DRSC_abd-A-HA:FBgn0037621	GSE101554	M1BP	FBgn0037621	S2-DRSC	S2	S2	NA	S2	abd-A-HA	remap2022_GSE101554.M1BP.S2-DRSC_abd-A-HA:FBgn0037621_SRR5834716,remap2022_GSE101554.M1BP.S2-DRSC_abd-A-HA:FBgn0037621_SRR5834717	remap2022_GSE101554.Input.M1BP.S2-DRSC_abd-A-HA:FBgn0037621_SRR5834734,remap2022_GSE101554.Input.M1BP.S2-DRSC_abd-A-HA:FBgn0037621_SRR5834735
GSE101554.Sce.S2-DRSC:FBgn0003330	GSE101554	Sce	FBgn0003330	S2-DRSC:FBgn0003330	S2	S2	NA	S2		remap2022_GSE101554.Sce.S2-DRSC:FBgn0003330_SRR5834722,remap2022_GSE101554.Sce.S2-DRSC:FBgn0003330_SRR5834723	remap2022_GSE101554.Input.Sce.S2-DRSC:FBgn0003330_SRR5834731,remap2022_GSE101554.Input.Sce.S2-DRSC:FBgn0003330_SRR5834732
GSE101554.Sce.S2-DRSC_abd-A-HA:FBgn0003330	GSE101554	Sce	FBgn0003330	S2-DRSC	S2	S2	NA	S2	abd-A-HA	remap2022_GSE101554.Sce.S2-DRSC_abd-A-HA:FBgn0003330_SRR5834724,remap2022_GSE101554.Sce.S2-DRSC_abd-A-HA:FBgn0003330_SRR5834725	remap2022_GSE101554.Input.Sce.S2-DRSC_abd-A-HA:FBgn0003330_SRR5834734,remap2022_GSE101554.Input.Sce.S2-DRSC_abd-A-HA:FBgn0003330_SRR5834735
GSE101554.Trl.S2-DRSC:FBgn0013263	GSE101554	Trl	FBgn0013263	S2-DRSC:FBgn0013263	S2	S2	NA	S2		remap2022_GSE101554.Trl.S2-DRSC:FBgn0013263_SRR5834718,remap2022_GSE101554.Trl.S2-DRSC:FBgn0013263_SRR5834719	remap2022_GSE101554.Input.Trl.S2-DRSC:FBgn0013263_SRR5834731,remap2022_GSE101554.Input.Trl.S2-DRSC:FBgn0013263_SRR5834732
GSE101554.Trl.S2-DRSC_abd-A-HA:FBgn0013263	GSE101554	Trl	FBgn0013263	S2-DRSC	S2	S2	NA	S2	abd-A-HA	remap2022_GSE101554.Trl.S2-DRSC_abd-A-HA:FBgn0013263_SRR5834720,remap2022_GSE101554.Trl.S2-DRSC_abd-A-HA:FBgn0013263_SRR5834721	remap2022_GSE101554.Input.Trl.S2-DRSC_abd-A-HA:FBgn0013263_SRR5834733
GSE101554.abd-A.S2-DRSC:FBgn0000014	GSE101554	abd-A	FBgn0000014	S2-DRSC:FBgn0000014	S2	S2	NA	S2		remap2022_GSE101554.abd-A.S2-DRSC:FBgn0000014_SRR5834704,remap2022_GSE101554.abd-A.S2-DRSC:FBgn0000014_SRR5834705	remap2022_GSE101554.Input.abd-A.S2-DRSC:FBgn0000014_SRR5834733
GSE102043.Dp.pharate_flight-muscle:FBgn0011763	GSE102043	Dp	FBgn0011763	pharate	pharate	flight-muscle	NA	pharate.flight-muscle	flight-muscle	remap2022_GSE102043.Dp.pharate_flight-muscle:FBgn0011763_SRR8424027,remap2022_GSE102043.Dp.pharate_flight-muscle:FBgn0011763_SRR8424028	remap2022_GSE102043.Input.Dp.pharate_flight-muscle:FBgn0011763_SRR5883310,remap2022_GSE102043.Input.Dp.pharate_flight-muscle:FBgn0011763_SRR5883311
GSE102043.Rbf.pharate_flight-muscle:FBgn0015799	GSE102043	Rbf	FBgn0015799	pharate	pharate	flight-muscle	NA	pharate.flight-muscle	flight-muscle	remap2022_GSE102043.Rbf.pharate_flight-muscle:FBgn0015799_SRR5883312,remap2022_GSE102043.Rbf.pharate_flight-muscle:FBgn0015799_SRR5883313	remap2022_GSE102043.Input.Rbf.pharate_flight-muscle:FBgn0015799_SRR5883310,remap2022_GSE102043.Input.Rbf.pharate_flight-muscle:FBgn0015799_SRR5883311
GSE102339.E-z.third-instar_Spps-KO_imaginal-discs-and-brains:FBgn0000629	GSE102339	E-z	FBgn0000629	third-instar	third_instar_larva	imaginal-disc,brain	NA	third_instar_larva.imaginal-disc,brain	Spps-KO,imaginal-discs-and-brains	remap2022_GSE102339.E-z.third-instar_Spps-KO_imaginal-discs-and-brains:FBgn0000629_SRR5907448,remap2022_GSE102339.E-z.third-instar_Spps-KO_imaginal-discs-and-brains:FBgn0000629_SRR5907449,remap2022_GSE102339.E-z.third-instar_Spps-KO_imaginal-discs-and-brains:FBgn0000629_SRR5907450	remap2022_GSE102339.Input.E-z.third-instar_Spps-KO_imaginal-discs-and-brains:FBgn0000629_SRR5907459,remap2022_GSE102339.Input.E-z.third-instar_Spps-KO_imaginal-discs-and-brains:FBgn0000629_SRR5907460
GSE102339.E-z.third-instar_imaginal-discs-and-brains:FBgn0000629	GSE102339	E-z	FBgn0000629	third-instar	third_instar_larva	imaginal-disc,brain	NA	third_instar_larva.imaginal-disc,brain	imaginal-discs-and-brains	remap2022_GSE102339.E-z.third-instar_imaginal-discs-and-brains:FBgn0000629_SRR5907429,remap2022_GSE102339.E-z.third-instar_imaginal-discs-and-brains:FBgn0000629_SRR5907430,remap2022_GSE102339.E-z.third-instar_imaginal-discs-and-brains:FBgn0000629_SRR5907431	remap2022_GSE102339.Input.E-z.third-instar_imaginal-discs-and-brains:FBgn0000629_SRR5907443,remap2022_GSE102339.Input.E-z.third-instar_imaginal-discs-and-brains:FBgn0000629_SRR5907444
GSE102339.Pc.third-instar_imaginal-discs-and-brains_SC-25762:FBgn0003042	GSE102339	Pc	FBgn0003042	third-instar	third_instar_larva	imaginal-disc,brain	NA	third_instar_larva.imaginal-disc,brain	imaginal-discs-and-brains,SC-25762	remap2022_GSE102339.Pc.third-instar_imaginal-discs-and-brains_SC-25762:FBgn0003042_SRR5907432,remap2022_GSE102339.Pc.third-instar_imaginal-discs-and-brains_SC-25762:FBgn0003042_SRR5907433	remap2022_GSE102339.Input.Pc.third-instar_imaginal-discs-and-brains_SC-25762:FBgn0003042_SRR5907443,remap2022_GSE102339.Input.Pc.third-instar_imaginal-discs-and-brains_SC-25762:FBgn0003042_SRR5907444
GSE102339.Psc.third-instar_Spps-KO_imaginal-discs-and-brains:FBgn0005624	GSE102339	Psc	FBgn0005624	third-instar	third_instar_larva	imaginal-disc,brain	NA	third_instar_larva.imaginal-disc,brain	Spps-KO,imaginal-discs-and-brains	remap2022_GSE102339.Psc.third-instar_Spps-KO_imaginal-discs-and-brains:FBgn0005624_SRR5907456,remap2022_GSE102339.Psc.third-instar_Spps-KO_imaginal-discs-and-brains:FBgn0005624_SRR5907457,remap2022_GSE102339.Psc.third-instar_Spps-KO_imaginal-discs-and-brains:FBgn0005624_SRR5907458	remap2022_GSE102339.Input.Psc.third-instar_Spps-KO_imaginal-discs-and-brains:FBgn0005624_SRR5907459,remap2022_GSE102339.Input.Psc.third-instar_Spps-KO_imaginal-discs-and-brains:FBgn0005624_SRR5907460
GSE102339.Psc.third-instar_imaginal-discs-and-brains:FBgn0005624	GSE102339	Psc	FBgn0005624	third-instar	third_instar_larva	imaginal-disc,brain	NA	third_instar_larva.imaginal-disc,brain	imaginal-discs-and-brains	remap2022_GSE102339.Psc.third-instar_imaginal-discs-and-brains:FBgn0005624_SRR5907439,remap2022_GSE102339.Psc.third-instar_imaginal-discs-and-brains:FBgn0005624_SRR5907440	remap2022_GSE102339.Input.Psc.third-instar_imaginal-discs-and-brains:FBgn0005624_SRR5907443,remap2022_GSE102339.Input.Psc.third-instar_imaginal-discs-and-brains:FBgn0005624_SRR5907444
GSE102339.Spps.third-instar_imaginal-discs-and-brains:FBgn0039169	GSE102339	Spps	FBgn0039169	third-instar	third_instar_larva	imaginal-disc,brain	NA	third_instar_larva.imaginal-disc,brain	imaginal-discs-and-brains	remap2022_GSE102339.Spps.third-instar_imaginal-discs-and-brains:FBgn0039169_SRR5907441,remap2022_GSE102339.Spps.third-instar_imaginal-discs-and-brains:FBgn0039169_SRR5907442	remap2022_GSE102339.Input.Spps.third-instar_imaginal-discs-and-brains:FBgn0039169_SRR5907443,remap2022_GSE102339.Input.Spps.third-instar_imaginal-discs-and-brains:FBgn0039169_SRR5907444
GSE102339.ph.third-instar_Pho-KO_imaginal-discs-and-brains:FBgn0004861-FBgn0004860	GSE102339	ph	FBgn0004861-FBgn0004860	third-instar	third_instar_larva	imaginal-disc,brain	NA	third_instar_larva.imaginal-disc,brain	Pho-KO,imaginal-discs-and-brains	remap2022_GSE102339.ph.third-instar_Pho-KO_imaginal-discs-and-brains:FBgn0004861-FBgn0004860_SRR5907464,remap2022_GSE102339.ph.third-instar_Pho-KO_imaginal-discs-and-brains:FBgn0004861-FBgn0004860_SRR5907465,remap2022_GSE102339.ph.third-instar_Pho-KO_imaginal-discs-and-brains:FBgn0004861-FBgn0004860_SRR5907466	remap2022_GSE102339.Input.ph.third-instar_Pho-KO_imaginal-discs-and-brains:FBgn0004861-FBgn0004860_SRR5907467,remap2022_GSE102339.Input.ph.third-instar_Pho-KO_imaginal-discs-and-brains:FBgn0004861-FBgn0004860_SRR5907468
GSE102339.ph.third-instar_Spps-KO_imaginal-discs-and-brains:FBgn0004861-FBgn0004860	GSE102339	ph	FBgn0004861-FBgn0004860	third-instar	third_instar_larva	imaginal-disc,brain	NA	third_instar_larva.imaginal-disc,brain	Spps-KO,imaginal-discs-and-brains	remap2022_GSE102339.ph.third-instar_Spps-KO_imaginal-discs-and-brains:FBgn0004861-FBgn0004860_SRR5907451,remap2022_GSE102339.ph.third-instar_Spps-KO_imaginal-discs-and-brains:FBgn0004861-FBgn0004860_SRR5907452,remap2022_GSE102339.ph.third-instar_Spps-KO_imaginal-discs-and-brains:FBgn0004861-FBgn0004860_SRR5907453	remap2022_GSE102339.Input.ph.third-instar_Spps-KO_imaginal-discs-and-brains:FBgn0004861-FBgn0004860_SRR5907459,remap2022_GSE102339.Input.ph.third-instar_Spps-KO_imaginal-discs-and-brains:FBgn0004861-FBgn0004860_SRR5907460
GSE102339.ph.third-instar_imaginal-discs-and-brains:FBgn0004861-FBgn0004860	GSE102339	ph	FBgn0004861-FBgn0004860	third-instar	third_instar_larva	imaginal-disc,brain	NA	third_instar_larva.imaginal-disc,brain	imaginal-discs-and-brains	remap2022_GSE102339.ph.third-instar_imaginal-discs-and-brains:FBgn0004861-FBgn0004860_SRR5907434,remap2022_GSE102339.ph.third-instar_imaginal-discs-and-brains:FBgn0004861-FBgn0004860_SRR6490544	remap2022_GSE102339.Input.ph.third-instar_imaginal-discs-and-brains:FBgn0004861-FBgn0004860_SRR5907443,remap2022_GSE102339.Input.ph.third-instar_imaginal-discs-and-brains:FBgn0004861-FBgn0004860_SRR5907444
GSE102339.pho.third-instar_Spps-KO_imaginal-discs-and-brains:FBgn0002521	GSE102339	pho	FBgn0002521	third-instar	third_instar_larva	imaginal-disc,brain	NA	third_instar_larva.imaginal-disc,brain	Spps-KO,imaginal-discs-and-brains	remap2022_GSE102339.pho.third-instar_Spps-KO_imaginal-discs-and-brains:FBgn0002521_SRR5907454,remap2022_GSE102339.pho.third-instar_Spps-KO_imaginal-discs-and-brains:FBgn0002521_SRR5907455	remap2022_GSE102339.Input.pho.third-instar_Spps-KO_imaginal-discs-and-brains:FBgn0002521_SRR5907459,remap2022_GSE102339.Input.pho.third-instar_Spps-KO_imaginal-discs-and-brains:FBgn0002521_SRR5907460
GSE102339.pho.third-instar_imaginal-discs-and-brains:FBgn0002521	GSE102339	pho	FBgn0002521	third-instar	third_instar_larva	imaginal-disc,brain	NA	third_instar_larva.imaginal-disc,brain	imaginal-discs-and-brains	remap2022_GSE102339.pho.third-instar_imaginal-discs-and-brains:FBgn0002521_SRR5907436,remap2022_GSE102339.pho.third-instar_imaginal-discs-and-brains:FBgn0002521_SRR5907437,remap2022_GSE102339.pho.third-instar_imaginal-discs-and-brains:FBgn0002521_SRR5907438	remap2022_GSE102339.Input.pho.third-instar_imaginal-discs-and-brains:FBgn0002521_SRR5907443,remap2022_GSE102339.Input.pho.third-instar_imaginal-discs-and-brains:FBgn0002521_SRR5907444
GSE102550.grh.embryo_13h-16h:FBgn0259211	GSE102550	grh	FBgn0259211	embryo	embryo	whole_embryo	13-16h	embryo.whole_embryo.13-16h	13h-16h	remap2022_GSE102550.grh.embryo_13h-16h:FBgn0259211_SRR5928309	remap2022_GSE102550.Input.grh.embryo_13h-16h:FBgn0259211_SRR5928310
GSE103601.Clamp.Kc167:FBgn0032979	GSE103601	Clamp	FBgn0032979	Kc167:FBgn0032979	Kc	Kc	NA	Kc		remap2022_GSE103601.Clamp.Kc167:FBgn0032979_SRR6014246,remap2022_GSE103601.Clamp.Kc167:FBgn0032979_SRR6014254	remap2022_GSE103601.Input.Clamp.Kc167:FBgn0032979_SRR6014247,remap2022_GSE103601.Input.Clamp.Kc167:FBgn0032979_SRR6014248,remap2022_GSE103601.Input.Clamp.Kc167:FBgn0032979_SRR6014249
GSE103601.Clamp.Kc167_abcam:FBgn0032979	GSE103601	Clamp	FBgn0032979	Kc167	Kc	Kc	NA	Kc	abcam	remap2022_GSE103601.Clamp.Kc167_abcam:FBgn0032979_SRR6014252,remap2022_GSE103601.Clamp.Kc167_abcam:FBgn0032979_SRR6014253	remap2022_GSE103601.Input.Clamp.Kc167_abcam:FBgn0032979_SRR6014258,remap2022_GSE103601.Input.Clamp.Kc167_abcam:FBgn0032979_SRR6014259
GSE103601.Cp190.Kc167:FBgn0000283	GSE103601	Cp190	FBgn0000283	Kc167:FBgn0000283	Kc	Kc	NA	Kc		remap2022_GSE103601.Cp190.Kc167:FBgn0000283_SRR6014250,remap2022_GSE103601.Cp190.Kc167:FBgn0000283_SRR6014255	remap2022_GSE103601.Input.Cp190.Kc167:FBgn0000283_SRR6014256
GSE103601.mod-mdg4.Kc167:FBgn0002781	GSE103601	mod-mdg4	FBgn0002781	Kc167:FBgn0002781	Kc	Kc	NA	Kc		remap2022_GSE103601.mod-mdg4.Kc167:FBgn0002781_SRR6014245,remap2022_GSE103601.mod-mdg4.Kc167:FBgn0002781_SRR6014251	remap2022_GSE103601.Input.mod-mdg4.Kc167:FBgn0002781_SRR6014257,remap2022_GSE103601.Input.mod-mdg4.Kc167:FBgn0002781_SRR6014248
GSE103601.su-Hw.Kc167:FBgn0003567	GSE103601	su-Hw	FBgn0003567	Kc167:FBgn0003567	Kc	Kc	NA	Kc		remap2022_GSE103601.su-Hw.Kc167:FBgn0003567_SRR6014243,remap2022_GSE103601.su-Hw.Kc167:FBgn0003567_SRR6014244	remap2022_GSE103601.Input.su-Hw.Kc167:FBgn0003567_SRR6014247,remap2022_GSE103601.Input.su-Hw.Kc167:FBgn0003567_SRR6014248,remap2022_GSE103601.Input.su-Hw.Kc167:FBgn0003567_SRR6014249
GSE103695.bcd.embryo_stage-3-5:FBgn0000166	GSE103695	bcd	FBgn0000166	embryo	embryo	whole_embryo	NA	embryo.whole_embryo	stage-3-5	remap2022_GSE103695.bcd.embryo_stage-3-5:FBgn0000166_SRR6025852	remap2022_GSE103695.Input.bcd.embryo_stage-3-5:FBgn0000166_SRR6025850
GSE104059.Br140.Schneider-2:FBgn0033155	GSE104059	Br140	FBgn0033155	Schneider-2:FBgn0033155	S2	S2	NA	S2		remap2022_GSE104059.Br140.Schneider-2:FBgn0033155_SRR6278160	remap2022_GSE104059.Input.Br140.Schneider-2:FBgn0033155_SRR6278161
GSE104059.Br140.embryo_12h-24h:FBgn0033155	GSE104059	Br140	FBgn0033155	embryo	embryo	whole_embryo	12-24h	embryo.whole_embryo.12-24h	12h-24h	remap2022_GSE104059.Br140.embryo_12h-24h:FBgn0033155_SRR6278150,remap2022_GSE104059.Br140.embryo_12h-24h:FBgn0033155_SRR6278152	remap2022_GSE104059.Input.Br140.embryo_12h-24h:FBgn0033155_SRR6278151,remap2022_GSE104059.Input.Br140.embryo_12h-24h:FBgn0033155_SRR6278153
GSE104059.fs-1-h.Schneider-2:FBgn0004656	GSE104059	fs-1-h	FBgn0004656	Schneider-2:FBgn0004656	S2	S2	NA	S2		remap2022_GSE104059.fs-1-h.Schneider-2:FBgn0004656_SRR6278162,remap2022_GSE104059.fs-1-h.Schneider-2:FBgn0004656_SRR6278164	remap2022_GSE104059.Input.fs-1-h.Schneider-2:FBgn0004656_SRR6278163,remap2022_GSE104059.Input.fs-1-h.Schneider-2:FBgn0004656_SRR6278165
GSE104059.fs-1-h.embryo_12h-24h:FBgn0004656	GSE104059	fs-1-h	FBgn0004656	embryo	embryo	whole_embryo	12-24h	embryo.whole_embryo.12-24h	12h-24h	remap2022_GSE104059.fs-1-h.embryo_12h-24h:FBgn0004656_SRR6278154,remap2022_GSE104059.fs-1-h.embryo_12h-24h:FBgn0004656_SRR6278156,remap2022_GSE104059.fs-1-h.embryo_12h-24h:FBgn0004656_SRR6278158	remap2022_GSE104059.Input.fs-1-h.embryo_12h-24h:FBgn0004656_SRR6278155,remap2022_GSE104059.Input.fs-1-h.embryo_12h-24h:FBgn0004656_SRR6278157,remap2022_GSE104059.Input.fs-1-h.embryo_12h-24h:FBgn0004656_SRR6278159
GSE104839.cic.embryo_2h-4h_gd7:FBgn0262582	GSE104839	cic	FBgn0262582	embryo	embryo	whole_embryo	2-4h	embryo.whole_embryo.2-4h	2h-4h,gd7	remap2022_GSE104839.cic.embryo_2h-4h_gd7:FBgn0262582_SRR6159396,remap2022_GSE104839.cic.embryo_2h-4h_gd7:FBgn0262582_SRR6159397	remap2022_GSE104839.Input.cic.embryo_2h-4h_gd7:FBgn0262582_SRR6159398,remap2022_GSE104839.Input.cic.embryo_2h-4h_gd7:FBgn0262582_SRR6159399
GSE104839.cic.embryo_2h-4h_toll10b:FBgn0262582	GSE104839	cic	FBgn0262582	embryo	embryo	whole_embryo	2-4h	embryo.whole_embryo.2-4h	2h-4h,toll10b	remap2022_GSE104839.cic.embryo_2h-4h_toll10b:FBgn0262582_SRR6159392,remap2022_GSE104839.cic.embryo_2h-4h_toll10b:FBgn0262582_SRR6159393	remap2022_GSE104839.Input.cic.embryo_2h-4h_toll10b:FBgn0262582_SRR6159394,remap2022_GSE104839.Input.cic.embryo_2h-4h_toll10b:FBgn0262582_SRR6159395
GSE104839.dl.embryo_2h-4h_toll10b:FBgn0260632	GSE104839	dl	FBgn0260632	embryo	embryo	whole_embryo	2-4h	embryo.whole_embryo.2-4h	2h-4h,toll10b	remap2022_GSE104839.dl.embryo_2h-4h_toll10b:FBgn0260632_SRR6159390,remap2022_GSE104839.dl.embryo_2h-4h_toll10b:FBgn0260632_SRR6159391	remap2022_GSE104839.Input.dl.embryo_2h-4h_toll10b:FBgn0260632_SRR6159394,remap2022_GSE104839.Input.dl.embryo_2h-4h_toll10b:FBgn0260632_SRR6159395
GSE107059.Clamp.Schneider-2_GFP:FBgn0032979	GSE107059	Clamp	FBgn0032979	Schneider-2	S2	S2	NA	S2	GFP	remap2022_GSE107059.Clamp.Schneider-2_GFP:FBgn0032979_SRR6303487,remap2022_GSE107059.Clamp.Schneider-2_GFP:FBgn0032979_SRR6303491,remap2022_GSE107059.Clamp.Schneider-2_GFP:FBgn0032979_SRR6303499	remap2022_GSE107059.Input.Clamp.Schneider-2_GFP:FBgn0032979_SRR6303486,remap2022_GSE107059.Input.Clamp.Schneider-2_GFP:FBgn0032979_SRR6303490,remap2022_GSE107059.Input.Clamp.Schneider-2_GFP:FBgn0032979_SRR6303498
GSE107059.Clamp.Schneider-2_Trl:FBgn0032979	GSE107059	Clamp	FBgn0032979	Schneider-2	S2	S2	NA	S2	Trl	remap2022_GSE107059.Clamp.Schneider-2_Trl:FBgn0032979_SRR6303503,remap2022_GSE107059.Clamp.Schneider-2_Trl:FBgn0032979_SRR6303507	remap2022_GSE107059.Input.Clamp.Schneider-2_Trl:FBgn0032979_SRR6303502,remap2022_GSE107059.Input.Clamp.Schneider-2_Trl:FBgn0032979_SRR6303506
GSE107059.Trl.Schneider-2_Clamp:FBgn0013263	GSE107059	Trl	FBgn0013263	Schneider-2	S2	S2	NA	S2	Clamp	remap2022_GSE107059.Trl.Schneider-2_Clamp:FBgn0013263_SRR6303520,remap2022_GSE107059.Trl.Schneider-2_Clamp:FBgn0013263_SRR6303524	remap2022_GSE107059.Input.Trl.Schneider-2_Clamp:FBgn0013263_SRR6303518,remap2022_GSE107059.Input.Trl.Schneider-2_Clamp:FBgn0013263_SRR6303522,remap2022_GSE107059.Input.Trl.Schneider-2_Clamp:FBgn0013263_SRR6303526
GSE107059.Trl.Schneider-2_GFP:FBgn0013263	GSE107059	Trl	FBgn0013263	Schneider-2	S2	S2	NA	S2	GFP	remap2022_GSE107059.Trl.Schneider-2_GFP:FBgn0013263_SRR6303488,remap2022_GSE107059.Trl.Schneider-2_GFP:FBgn0013263_SRR6303492,remap2022_GSE107059.Trl.Schneider-2_GFP:FBgn0013263_SRR6303496	remap2022_GSE107059.Input.Trl.Schneider-2_GFP:FBgn0013263_SRR6303486,remap2022_GSE107059.Input.Trl.Schneider-2_GFP:FBgn0013263_SRR6303494,remap2022_GSE107059.Input.Trl.Schneider-2_GFP:FBgn0013263_SRR6303490
GSE107059.Trl.Schneider-2_Trl:FBgn0013263	GSE107059	Trl	FBgn0013263	Schneider-2	S2	S2	NA	S2	Trl	remap2022_GSE107059.Trl.Schneider-2_Trl:FBgn0013263_SRR6303504,remap2022_GSE107059.Trl.Schneider-2_Trl:FBgn0013263_SRR6303508	remap2022_GSE107059.Input.Trl.Schneider-2_Trl:FBgn0013263_SRR6303502,remap2022_GSE107059.Input.Trl.Schneider-2_Trl:FBgn0013263_SRR6303506
GSE107059.msl-3.Schneider-2_GFP:FBgn0002775	GSE107059	msl-3	FBgn0002775	Schneider-2	S2	S2	NA	S2	GFP	remap2022_GSE107059.msl-3.Schneider-2_GFP:FBgn0002775_SRR6303489,remap2022_GSE107059.msl-3.Schneider-2_GFP:FBgn0002775_SRR6303493,remap2022_GSE107059.msl-3.Schneider-2_GFP:FBgn0002775_SRR6303497,remap2022_GSE107059.msl-3.Schneider-2_GFP:FBgn0002775_SRR6303501	remap2022_GSE107059.Input.msl-3.Schneider-2_GFP:FBgn0002775_SRR6303486,remap2022_GSE107059.Input.msl-3.Schneider-2_GFP:FBgn0002775_SRR6303494,remap2022_GSE107059.Input.msl-3.Schneider-2_GFP:FBgn0002775_SRR6303490,remap2022_GSE107059.Input.msl-3.Schneider-2_GFP:FBgn0002775_SRR6303498
GSE107059.msl-3.Schneider-2_Trl:FBgn0002775	GSE107059	msl-3	FBgn0002775	Schneider-2	S2	S2	NA	S2	Trl	remap2022_GSE107059.msl-3.Schneider-2_Trl:FBgn0002775_SRR6303505,remap2022_GSE107059.msl-3.Schneider-2_Trl:FBgn0002775_SRR6303509,remap2022_GSE107059.msl-3.Schneider-2_Trl:FBgn0002775_SRR6303513	remap2022_GSE107059.Input.msl-3.Schneider-2_Trl:FBgn0002775_SRR6303502,remap2022_GSE107059.Input.msl-3.Schneider-2_Trl:FBgn0002775_SRR6303506,remap2022_GSE107059.Input.msl-3.Schneider-2_Trl:FBgn0002775_SRR6303510
GSE109898.mle.third-instar_white-eyed_male:FBgn0002774	GSE109898	mle	FBgn0002774	third-instar	third_instar_larva	whole_larva	NA	third_instar_larva.whole_larva	white-eyed,male	remap2022_GSE109898.mle.third-instar_white-eyed_male:FBgn0002774_SRR6655558r1-SRR6655558r2	remap2022_GSE109898.Input.mle.third-instar_white-eyed_male:FBgn0002774_SRR6655559r1-SRR6655559r2
GSE109898.msl-2.third-instar_white-eyed_female:FBgn0005616	GSE109898	msl-2	FBgn0005616	third-instar	third_instar_larva	whole_larva	NA	third_instar_larva.whole_larva	white-eyed,female	remap2022_GSE109898.msl-2.third-instar_white-eyed_female:FBgn0005616_SRR6655529r1-SRR6655529r2,remap2022_GSE109898.msl-2.third-instar_white-eyed_female:FBgn0005616_SRR6655530r1-SRR6655530r2,remap2022_GSE109898.msl-2.third-instar_white-eyed_female:FBgn0005616_SRR6655531r1-SRR6655531r2	remap2022_GSE109898.Input.msl-2.third-instar_white-eyed_female:FBgn0005616_SRR6655532r1-SRR6655532r2,remap2022_GSE109898.Input.msl-2.third-instar_white-eyed_female:FBgn0005616_SRR6655533r1-SRR6655533r2,remap2022_GSE109898.Input.msl-2.third-instar_white-eyed_female:FBgn0005616_SRR6655534r1-SRR6655534r2
GSE109898.msl-2.third-instar_white-eyed_male:FBgn0005616	GSE109898	msl-2	FBgn0005616	third-instar	third_instar_larva	whole_larva	NA	third_instar_larva.whole_larva	white-eyed,male	remap2022_GSE109898.msl-2.third-instar_white-eyed_male:FBgn0005616_SRR6655560r1-SRR6655560r2,remap2022_GSE109898.msl-2.third-instar_white-eyed_male:FBgn0005616_SRR6655561r1-SRR6655561r2,remap2022_GSE109898.msl-2.third-instar_white-eyed_male:FBgn0005616_SRR6655562r1-SRR6655562r2,remap2022_GSE109898.msl-2.third-instar_white-eyed_male:FBgn0005616_SRR6655563r1-SRR6655563r2	remap2022_GSE109898.Input.msl-2.third-instar_white-eyed_male:FBgn0005616_SRR6655564r1-SRR6655564r2,remap2022_GSE109898.Input.msl-2.third-instar_white-eyed_male:FBgn0005616_SRR6655565r1-SRR6655565r2,remap2022_GSE109898.Input.msl-2.third-instar_white-eyed_male:FBgn0005616_SRR6655566r1-SRR6655566r2,remap2022_GSE109898.Input.msl-2.third-instar_white-eyed_male:FBgn0005616_SRR6655567r1-SRR6655567r2
GSE110331.Lsd-1.adult_ovary:FBgn0039114	GSE110331	Lsd-1	FBgn0039114	adult	adult	ovary	NA	adult.ovary	ovary	remap2022_GSE110331.Lsd-1.adult_ovary:FBgn0039114_SRR6686970,remap2022_GSE110331.Lsd-1.adult_ovary:FBgn0039114_SRR6686971,remap2022_GSE110331.Lsd-1.adult_ovary:FBgn0039114_SRR6686972	remap2022_GSE110331.Input.Lsd-1.adult_ovary:FBgn0039114_SRR6686976,remap2022_GSE110331.Input.Lsd-1.adult_ovary:FBgn0039114_SRR6686977,remap2022_GSE110331.Input.Lsd-1.adult_ovary:FBgn0039114_SRR6686978
GSE110687.ato.third-instar_Brain:FBgn0010433	GSE110687	ato	FBgn0010433	third-instar	third_instar_larva	Brain	NA	third_instar_larva.Brain	Brain	remap2022_GSE110687.ato.third-instar_Brain:FBgn0010433_SRR6750396,remap2022_GSE110687.ato.third-instar_Brain:FBgn0010433_SRR6750397,remap2022_GSE110687.ato.third-instar_Brain:FBgn0010433_SRR6750398,remap2022_GSE110687.ato.third-instar_Brain:FBgn0010433_SRR6750399,remap2022_GSE110687.ato.third-instar_Brain:FBgn0010433_SRR6750400,remap2022_GSE110687.ato.third-instar_Brain:FBgn0010433_SRR6750401,rem…	remap2022_GSE110687.Input.ato.third-instar_Brain:FBgn0010433_SRR6750404,remap2022_GSE110687.Input.ato.third-instar_Brain:FBgn0010433_SRR6750405,remap2022_GSE110687.Input.ato.third-instar_Brain:FBgn0010433_SRR6750406,remap2022_GSE110687.Input.ato.third-instar_Brain:FBgn0010433_SRR6750407,remap2022_GSE110687.Input.ato.third-instar_Brain:FBgn0010433_SRR6750408,remap2022_GSE110687.Input.ato.third-ins…
GSE112868.ey.third-instar_eye-antennal-disc:FBgn0005558	GSE112868	ey	FBgn0005558	third-instar	third_instar_larva	eye-antenna-imaginal-disc	NA	third_instar_larva.eye-antenna-imaginal-disc	eye-antennal-disc	remap2022_GSE112868.ey.third-instar_eye-antennal-disc:FBgn0005558_SRR6967846,remap2022_GSE112868.ey.third-instar_eye-antennal-disc:FBgn0005558_SRR6967847	remap2022_GSE112868.Input.ey.third-instar_eye-antennal-disc:FBgn0005558_SRR6967848,remap2022_GSE112868.Input.ey.third-instar_eye-antennal-disc:FBgn0005558_SRR6967849
GSE113470.Ssrp.Schneider-2_SSRP1dsRNA_a_homemade:FBgn0010278	GSE113470	Ssrp	FBgn0010278	Schneider-2	S2	S2	NA	S2	SSRP1dsRNA,a,homemade	remap2022_GSE113470.Ssrp.Schneider-2_SSRP1dsRNA_a_homemade:FBgn0010278_SRR7050523,remap2022_GSE113470.Ssrp.Schneider-2_SSRP1dsRNA_a_homemade:FBgn0010278_SRR7050524,remap2022_GSE113470.Ssrp.Schneider-2_SSRP1dsRNA_a_homemade:FBgn0010278_SRR7050525,remap2022_GSE113470.Ssrp.Schneider-2_SSRP1dsRNA_a_homemade:FBgn0010278_SRR7050526,remap2022_GSE113470.Ssrp.Schneider-2_SSRP1dsRNA_a_homemade:FBgn0010278_…	remap2022_GSE113470.Input.Ssrp.Schneider-2_SSRP1dsRNA_a_homemade:FBgn0010278_SRR7050467,remap2022_GSE113470.Input.Ssrp.Schneider-2_SSRP1dsRNA_a_homemade:FBgn0010278_SRR7050468,remap2022_GSE113470.Input.Ssrp.Schneider-2_SSRP1dsRNA_a_homemade:FBgn0010278_SRR7050469,remap2022_GSE113470.Input.Ssrp.Schneider-2_SSRP1dsRNA_a_homemade:FBgn0010278_SRR7050470,remap2022_GSE113470.Input.Ssrp.Schneider-2_SSRP…
GSE113470.Ssrp.Schneider-2_SSRP1dsRNA_b_homemade:FBgn0010278	GSE113470	Ssrp	FBgn0010278	Schneider-2	S2	S2	NA	S2	SSRP1dsRNA,b,homemade	remap2022_GSE113470.Ssrp.Schneider-2_SSRP1dsRNA_b_homemade:FBgn0010278_SRR7050531,remap2022_GSE113470.Ssrp.Schneider-2_SSRP1dsRNA_b_homemade:FBgn0010278_SRR7050532,remap2022_GSE113470.Ssrp.Schneider-2_SSRP1dsRNA_b_homemade:FBgn0010278_SRR7050533,remap2022_GSE113470.Ssrp.Schneider-2_SSRP1dsRNA_b_homemade:FBgn0010278_SRR7050534,remap2022_GSE113470.Ssrp.Schneider-2_SSRP1dsRNA_b_homemade:FBgn0010278_…	remap2022_GSE113470.Input.Ssrp.Schneider-2_SSRP1dsRNA_b_homemade:FBgn0010278_SRR7050475,remap2022_GSE113470.Input.Ssrp.Schneider-2_SSRP1dsRNA_b_homemade:FBgn0010278_SRR7050476,remap2022_GSE113470.Input.Ssrp.Schneider-2_SSRP1dsRNA_b_homemade:FBgn0010278_SRR7050477,remap2022_GSE113470.Input.Ssrp.Schneider-2_SSRP1dsRNA_b_homemade:FBgn0010278_SRR7050478,remap2022_GSE113470.Input.Ssrp.Schneider-2_SSRP…
GSE113470.Ssrp.Schneider-2_eGFPdsRNA_homemade:FBgn0010278	GSE113470	Ssrp	FBgn0010278	Schneider-2	S2	S2	NA	S2	eGFPdsRNA,homemade	remap2022_GSE113470.Ssrp.Schneider-2_eGFPdsRNA_homemade:FBgn0010278_SRR7050515,remap2022_GSE113470.Ssrp.Schneider-2_eGFPdsRNA_homemade:FBgn0010278_SRR7050516,remap2022_GSE113470.Ssrp.Schneider-2_eGFPdsRNA_homemade:FBgn0010278_SRR7050517,remap2022_GSE113470.Ssrp.Schneider-2_eGFPdsRNA_homemade:FBgn0010278_SRR7050518,remap2022_GSE113470.Ssrp.Schneider-2_eGFPdsRNA_homemade:FBgn0010278_SRR7050519,rema…	remap2022_GSE113470.Input.Ssrp.Schneider-2_eGFPdsRNA_homemade:FBgn0010278_SRR7050459,remap2022_GSE113470.Input.Ssrp.Schneider-2_eGFPdsRNA_homemade:FBgn0010278_SRR7050460,remap2022_GSE113470.Input.Ssrp.Schneider-2_eGFPdsRNA_homemade:FBgn0010278_SRR7050461,remap2022_GSE113470.Input.Ssrp.Schneider-2_eGFPdsRNA_homemade:FBgn0010278_SRR7050462,remap2022_GSE113470.Input.Ssrp.Schneider-2_eGFPdsRNA_homema…
GSE113470.dre4.Schneider-2_SSRP1dsRNA_a_homemade:FBgn0002183	GSE113470	dre4	FBgn0002183	Schneider-2	S2	S2	NA	S2	SSRP1dsRNA,a,homemade	remap2022_GSE113470.dre4.Schneider-2_SSRP1dsRNA_a_homemade:FBgn0002183_SRR7050547,remap2022_GSE113470.dre4.Schneider-2_SSRP1dsRNA_a_homemade:FBgn0002183_SRR7050548,remap2022_GSE113470.dre4.Schneider-2_SSRP1dsRNA_a_homemade:FBgn0002183_SRR7050549,remap2022_GSE113470.dre4.Schneider-2_SSRP1dsRNA_a_homemade:FBgn0002183_SRR7050550,remap2022_GSE113470.dre4.Schneider-2_SSRP1dsRNA_a_homemade:FBgn0002183_…	remap2022_GSE113470.Input.dre4.Schneider-2_SSRP1dsRNA_a_homemade:FBgn0002183_SRR7050491,remap2022_GSE113470.Input.dre4.Schneider-2_SSRP1dsRNA_a_homemade:FBgn0002183_SRR7050492,remap2022_GSE113470.Input.dre4.Schneider-2_SSRP1dsRNA_a_homemade:FBgn0002183_SRR7050493,remap2022_GSE113470.Input.dre4.Schneider-2_SSRP1dsRNA_a_homemade:FBgn0002183_SRR7050494,remap2022_GSE113470.Input.dre4.Schneider-2_SSRP…
GSE113470.dre4.Schneider-2_SSRP1dsRNA_b_homemade:FBgn0002183	GSE113470	dre4	FBgn0002183	Schneider-2	S2	S2	NA	S2	SSRP1dsRNA,b,homemade	remap2022_GSE113470.dre4.Schneider-2_SSRP1dsRNA_b_homemade:FBgn0002183_SRR7050555,remap2022_GSE113470.dre4.Schneider-2_SSRP1dsRNA_b_homemade:FBgn0002183_SRR7050556,remap2022_GSE113470.dre4.Schneider-2_SSRP1dsRNA_b_homemade:FBgn0002183_SRR7050557,remap2022_GSE113470.dre4.Schneider-2_SSRP1dsRNA_b_homemade:FBgn0002183_SRR7050558,remap2022_GSE113470.dre4.Schneider-2_SSRP1dsRNA_b_homemade:FBgn0002183_…	remap2022_GSE113470.Input.dre4.Schneider-2_SSRP1dsRNA_b_homemade:FBgn0002183_SRR7050499,remap2022_GSE113470.Input.dre4.Schneider-2_SSRP1dsRNA_b_homemade:FBgn0002183_SRR7050500,remap2022_GSE113470.Input.dre4.Schneider-2_SSRP1dsRNA_b_homemade:FBgn0002183_SRR7050501,remap2022_GSE113470.Input.dre4.Schneider-2_SSRP1dsRNA_b_homemade:FBgn0002183_SRR7050502,remap2022_GSE113470.Input.dre4.Schneider-2_SSRP…
GSE113470.dre4.Schneider-2_eGFPdsRNA_homemade:FBgn0002183	GSE113470	dre4	FBgn0002183	Schneider-2	S2	S2	NA	S2	eGFPdsRNA,homemade	remap2022_GSE113470.dre4.Schneider-2_eGFPdsRNA_homemade:FBgn0002183_SRR7050539,remap2022_GSE113470.dre4.Schneider-2_eGFPdsRNA_homemade:FBgn0002183_SRR7050540,remap2022_GSE113470.dre4.Schneider-2_eGFPdsRNA_homemade:FBgn0002183_SRR7050541,remap2022_GSE113470.dre4.Schneider-2_eGFPdsRNA_homemade:FBgn0002183_SRR7050542,remap2022_GSE113470.dre4.Schneider-2_eGFPdsRNA_homemade:FBgn0002183_SRR7050543,rema…	remap2022_GSE113470.Input.dre4.Schneider-2_eGFPdsRNA_homemade:FBgn0002183_SRR7050483,remap2022_GSE113470.Input.dre4.Schneider-2_eGFPdsRNA_homemade:FBgn0002183_SRR7050484,remap2022_GSE113470.Input.dre4.Schneider-2_eGFPdsRNA_homemade:FBgn0002183_SRR7050485,remap2022_GSE113470.Input.dre4.Schneider-2_eGFPdsRNA_homemade:FBgn0002183_SRR7050486,remap2022_GSE113470.Input.dre4.Schneider-2_eGFPdsRNA_homema…
GSE114092.aop.embryo_stage-11_pnt-Delta88:FBgn0000097	GSE114092	aop	FBgn0000097	embryo	embryo	whole_embryo	NA	embryo.whole_embryo	stage-11,pnt-Delta88	remap2022_GSE114092.aop.embryo_stage-11_pnt-Delta88:FBgn0000097_SRR7126159	remap2022_GSE114092.Input.aop.embryo_stage-11_pnt-Delta88:FBgn0000097_SRR7126158
GSE114092.aop.embryo_stage-11_w1118:FBgn0000097	GSE114092	aop	FBgn0000097	embryo	embryo	whole_embryo	NA	embryo.whole_embryo	stage-11,w1118	remap2022_GSE114092.aop.embryo_stage-11_w1118:FBgn0000097_SRR7126157	remap2022_GSE114092.Input.aop.embryo_stage-11_w1118:FBgn0000097_SRR7126156
GSE114092.gro.embryo_stage-11_pnt-Delta88:FBgn0001139	GSE114092	gro	FBgn0001139	embryo	embryo	whole_embryo	NA	embryo.whole_embryo	stage-11,pnt-Delta88	remap2022_GSE114092.gro.embryo_stage-11_pnt-Delta88:FBgn0001139_SRR7126163	remap2022_GSE114092.Input.gro.embryo_stage-11_pnt-Delta88:FBgn0001139_SRR7126162
GSE114092.gro.embryo_stage-11_w1118:FBgn0001139	GSE114092	gro	FBgn0001139	embryo	embryo	whole_embryo	NA	embryo.whole_embryo	stage-11,w1118	remap2022_GSE114092.gro.embryo_stage-11_w1118:FBgn0001139_SRR7126161	remap2022_GSE114092.Input.gro.embryo_stage-11_w1118:FBgn0001139_SRR7126160
GSE114832.pho.embryo_14h-16h:FBgn0002521	GSE114832	pho	FBgn0002521	embryo	embryo	whole_embryo	14-16h	embryo.whole_embryo.14-16h	14h-16h	remap2022_GSE114832.pho.embryo_14h-16h:FBgn0002521_SRR7208347r1-SRR7208347r2	remap2022_GSE114832.Input.pho.embryo_14h-16h:FBgn0002521_SRR7208346r1-SRR7208346r2
GSE114832.pho.embryo_2h-4h:FBgn0002521	GSE114832	pho	FBgn0002521	embryo	embryo	whole_embryo	2-4h	embryo.whole_embryo.2-4h	2h-4h	remap2022_GSE114832.pho.embryo_2h-4h:FBgn0002521_SRR7208344r1-SRR7208344r2	remap2022_GSE114832.Input.pho.embryo_2h-4h:FBgn0002521_SRR7208343r1-SRR7208343r2
GSE116362.Mrtf.adult_ovary_MAL:FBgn0052296	GSE116362	Mrtf	FBgn0052296	adult	adult	ovary	NA	adult.ovary	ovary,MAL	remap2022_GSE116362.Mrtf.adult_ovary_MAL:FBgn0052296_SRR7444502	remap2022_GSE116362.Input.Mrtf.adult_ovary_MAL:FBgn0052296_SRR7444500
GSE116362.Mrtf.adult_ovary_dMAL:FBgn0052296	GSE116362	Mrtf	FBgn0052296	adult	adult	ovary	NA	adult.ovary	ovary,dMAL	remap2022_GSE116362.Mrtf.adult_ovary_dMAL:FBgn0052296_SRR7444496	remap2022_GSE116362.Input.Mrtf.adult_ovary_dMAL:FBgn0052296_SRR7444495
GSE116882.Cdk9.Kc167:FBgn0019949	GSE116882	Cdk9	FBgn0019949	Kc167:FBgn0019949	Kc	Kc	NA	Kc		remap2022_GSE116882.Cdk9.Kc167:FBgn0019949_SRR7506468,remap2022_GSE116882.Cdk9.Kc167:FBgn0019949_SRR7506469	remap2022_GSE116882.Input.Cdk9.Kc167:FBgn0019949_SRR7506472,remap2022_GSE116882.Input.Cdk9.Kc167:FBgn0019949_SRR7506473
GSE116882.Cdk9.Kc167_siAGO2:FBgn0019949	GSE116882	Cdk9	FBgn0019949	Kc167	Kc	Kc	NA	Kc	siAGO2	remap2022_GSE116882.Cdk9.Kc167_siAGO2:FBgn0019949_SRR7506470,remap2022_GSE116882.Cdk9.Kc167_siAGO2:FBgn0019949_SRR7506471	remap2022_GSE116882.Input.Cdk9.Kc167_siAGO2:FBgn0019949_SRR7506474,remap2022_GSE116882.Input.Cdk9.Kc167_siAGO2:FBgn0019949_SRR7506475
GSE116887.AGO2.Kc167:FBgn0087035	GSE116887	AGO2	FBgn0087035	Kc167:FBgn0087035	Kc	Kc	NA	Kc		remap2022_GSE116887.AGO2.Kc167:FBgn0087035_SRR7506524,remap2022_GSE116887.AGO2.Kc167:FBgn0087035_SRR7506525	remap2022_GSE116887.Input.AGO2.Kc167:FBgn0087035_SRR7506520,remap2022_GSE116887.Input.AGO2.Kc167:FBgn0087035_SRR7506521
GSE116887.AGO2.Kc167_triptolide:FBgn0087035	GSE116887	AGO2	FBgn0087035	Kc167	Kc	Kc	NA	Kc	triptolide	remap2022_GSE116887.AGO2.Kc167_triptolide:FBgn0087035_SRR7506526,remap2022_GSE116887.AGO2.Kc167_triptolide:FBgn0087035_SRR7506527	remap2022_GSE116887.Input.AGO2.Kc167_triptolide:FBgn0087035_SRR7506522,remap2022_GSE116887.Input.AGO2.Kc167_triptolide:FBgn0087035_SRR7506523
GSE118047.EcR.Kc167:FBgn0000546	GSE118047	EcR	FBgn0000546	Kc167:FBgn0000546	Kc	Kc	NA	Kc		remap2022_GSE118047.EcR.Kc167:FBgn0000546_SRR7638405r1-SRR7638405r2,remap2022_GSE118047.EcR.Kc167:FBgn0000546_SRR7638406r1-SRR7638406r2
GSE118047.EcR.Kc167_20-HE:FBgn0000546	GSE118047	EcR	FBgn0000546	Kc167	Kc	Kc	NA	Kc	20-HE	remap2022_GSE118047.EcR.Kc167_20-HE:FBgn0000546_SRR7638411r1-SRR7638411r2
GSE118047.Pc.Kc167:FBgn0003042	GSE118047	Pc	FBgn0003042	Kc167:FBgn0003042	Kc	Kc	NA	Kc		remap2022_GSE118047.Pc.Kc167:FBgn0003042_SRR7638407r1-SRR7638407r2
GSE118047.Pc.Kc167_20-HE:FBgn0003042	GSE118047	Pc	FBgn0003042	Kc167	Kc	Kc	NA	Kc	20-HE	remap2022_GSE118047.Pc.Kc167_20-HE:FBgn0003042_SRR7638412r1-SRR7638412r2
GSE118047.psq.Kc167_20-HE:FBgn0263102	GSE118047	psq	FBgn0263102	Kc167	Kc	Kc	NA	Kc	20-HE	remap2022_GSE118047.psq.Kc167_20-HE:FBgn0263102_SRR7638409r1-SRR7638409r2,remap2022_GSE118047.psq.Kc167_20-HE:FBgn0263102_SRR7638410r1-SRR7638410r2
GSE118047.psq.Kc167_psqtot:FBgn0263102	GSE118047	psq	FBgn0263102	Kc167	Kc	Kc	NA	Kc	psqtot	remap2022_GSE118047.psq.Kc167_psqtot:FBgn0263102_SRR7638403r1-SRR7638403r2,remap2022_GSE118047.psq.Kc167_psqtot:FBgn0263102_SRR7638404r1-SRR7638404r2
GSE118047.psq_L.Kc167_20-HE:FBgn0263102	GSE118047	psq_L	FBgn0263102	Kc167	Kc	Kc	NA	Kc	20-HE	remap2022_GSE118047.psq_L.Kc167_20-HE:FBgn0263102_SRR7638408r1-SRR7638408r2
GSE118047.psq_L.Kc167_psqL:FBgn0263102	GSE118047	psq_L	FBgn0263102	Kc167	Kc	Kc	NA	Kc	psqL	remap2022_GSE118047.psq_L.Kc167_psqL:FBgn0263102_SRR7638401r1-SRR7638401r2,remap2022_GSE118047.psq_L.Kc167_psqL:FBgn0263102_SRR7638402r1-SRR7638402r2
GSE118291.Hmr.Schneider-2_induced:FBgn0001206	GSE118291	Hmr	FBgn0001206	Schneider-2	S2	S2	NA	S2	induced	remap2022_GSE118291.Hmr.Schneider-2_induced:FBgn0001206_SRR7659068,remap2022_GSE118291.Hmr.Schneider-2_induced:FBgn0001206_SRR7659072	remap2022_GSE118291.Input.Hmr.Schneider-2_induced:FBgn0001206_SRR7659067,remap2022_GSE118291.Input.Hmr.Schneider-2_induced:FBgn0001206_SRR7659070
GSE118291.Hmr.Schneider-2_uninduced:FBgn0001206	GSE118291	Hmr	FBgn0001206	Schneider-2	S2	S2	NA	S2	uninduced	remap2022_GSE118291.Hmr.Schneider-2_uninduced:FBgn0001206_SRR7659071	remap2022_GSE118291.Input.Hmr.Schneider-2_uninduced:FBgn0001206_SRR7659069
GSE118699.Clamp.Kc167:FBgn0032979	GSE118699	Clamp	FBgn0032979	Kc167:FBgn0032979	Kc	Kc	NA	Kc		remap2022_GSE118699.Clamp.Kc167:FBgn0032979_SRR7706255,remap2022_GSE118699.Clamp.Kc167:FBgn0032979_SRR7706257	remap2022_GSE118699.Input.Clamp.Kc167:FBgn0032979_SRR7706251,remap2022_GSE118699.Input.Clamp.Kc167:FBgn0032979_SRR7706252
GSE118699.Clamp.Kc167_dsCP190:FBgn0032979	GSE118699	Clamp	FBgn0032979	Kc167	Kc	Kc	NA	Kc	dsCP190	remap2022_GSE118699.Clamp.Kc167_dsCP190:FBgn0032979_SRR7706259,remap2022_GSE118699.Clamp.Kc167_dsCP190:FBgn0032979_SRR7706261	remap2022_GSE118699.Input.Clamp.Kc167_dsCP190:FBgn0032979_SRR7706253,remap2022_GSE118699.Input.Clamp.Kc167_dsCP190:FBgn0032979_SRR7706254
GSE118699.Cp190.Kc167:FBgn0000283	GSE118699	Cp190	FBgn0000283	Kc167:FBgn0000283	Kc	Kc	NA	Kc		remap2022_GSE118699.Cp190.Kc167:FBgn0000283_SRR7706256,remap2022_GSE118699.Cp190.Kc167:FBgn0000283_SRR7706258	remap2022_GSE118699.Input.Cp190.Kc167:FBgn0000283_SRR7706251,remap2022_GSE118699.Input.Cp190.Kc167:FBgn0000283_SRR7706252
GSE118699.Cp190.Kc167_dsCP190:FBgn0000283	GSE118699	Cp190	FBgn0000283	Kc167	Kc	Kc	NA	Kc	dsCP190	remap2022_GSE118699.Cp190.Kc167_dsCP190:FBgn0000283_SRR7706260,remap2022_GSE118699.Cp190.Kc167_dsCP190:FBgn0000283_SRR7706262	remap2022_GSE118699.Input.Cp190.Kc167_dsCP190:FBgn0000283_SRR7706253,remap2022_GSE118699.Input.Cp190.Kc167_dsCP190:FBgn0000283_SRR7706254
GSE118756.Cap-H2.Kc167:FBgn0037831	GSE118756	Cap-H2	FBgn0037831	Kc167:FBgn0037831	Kc	Kc	NA	Kc		remap2022_GSE118756.Cap-H2.Kc167:FBgn0037831_SRR7721037r1-SRR7721037r2
GSE118756.Cap-H2.Kc167_FLV:FBgn0037831	GSE118756	Cap-H2	FBgn0037831	Kc167	Kc	Kc	NA	Kc	FLV	remap2022_GSE118756.Cap-H2.Kc167_FLV:FBgn0037831_SRR7721038r1-SRR7721038r2
GSE118756.vtd.Kc167:FBgn0260987	GSE118756	vtd	FBgn0260987	Kc167:FBgn0260987	Kc	Kc	NA	Kc		remap2022_GSE118756.vtd.Kc167:FBgn0260987_SRR7721039r1-SRR7721039r2
GSE118756.vtd.Kc167_FLV:FBgn0260987	GSE118756	vtd	FBgn0260987	Kc167	Kc	Kc	NA	Kc	FLV	remap2022_GSE118756.vtd.Kc167_FLV:FBgn0260987_SRR7721040r1-SRR7721040r2
GSE119448.Clamp.embryo_female_nuclear-cycle-11:FBgn0032979	GSE119448	Clamp	FBgn0032979	embryo	embryo	whole_embryo	NA	embryo.whole_embryo	female,nuclear-cycle-11	remap2022_GSE119448.Clamp.embryo_female_nuclear-cycle-11:FBgn0032979_SRR7784124
GSE119448.Clamp.embryo_female_nuclear-cycle-12:FBgn0032979	GSE119448	Clamp	FBgn0032979	embryo	embryo	whole_embryo	NA	embryo.whole_embryo	female,nuclear-cycle-12	remap2022_GSE119448.Clamp.embryo_female_nuclear-cycle-12:FBgn0032979_SRR7784125,remap2022_GSE119448.Clamp.embryo_female_nuclear-cycle-12:FBgn0032979_SRR7784126
GSE119448.Clamp.embryo_female_nuclear-cycle-13:FBgn0032979	GSE119448	Clamp	FBgn0032979	embryo	embryo	whole_embryo	NA	embryo.whole_embryo	female,nuclear-cycle-13	remap2022_GSE119448.Clamp.embryo_female_nuclear-cycle-13:FBgn0032979_SRR7784127,remap2022_GSE119448.Clamp.embryo_female_nuclear-cycle-13:FBgn0032979_SRR7784128
GSE119448.Clamp.embryo_female_nuclear-cycle-14:FBgn0032979	GSE119448	Clamp	FBgn0032979	embryo	embryo	whole_embryo	NA	embryo.whole_embryo	female,nuclear-cycle-14	remap2022_GSE119448.Clamp.embryo_female_nuclear-cycle-14:FBgn0032979_SRR7784129,remap2022_GSE119448.Clamp.embryo_female_nuclear-cycle-14:FBgn0032979_SRR7784130
GSE119448.Clamp.embryo_female_nuclear-cycle-inf-10:FBgn0032979	GSE119448	Clamp	FBgn0032979	embryo	embryo	whole_embryo	NA	embryo.whole_embryo	female,nuclear-cycle-inf-10	remap2022_GSE119448.Clamp.embryo_female_nuclear-cycle-inf-10:FBgn0032979_SRR7784123
GSE119708.Clamp.Schneider-2_Clamp1_RNAi1:FBgn0032979	GSE119708	Clamp	FBgn0032979	Schneider-2	S2	S2	NA	S2	Clamp1,RNAi1	remap2022_GSE119708.Clamp.Schneider-2_Clamp1_RNAi1:FBgn0032979_SRR7813067	remap2022_GSE119708.Input.Clamp.Schneider-2_Clamp1_RNAi1:FBgn0032979_SRR7813077
GSE119708.Clamp.Schneider-2_Clamp1_RNAi3:FBgn0032979	GSE119708	Clamp	FBgn0032979	Schneider-2	S2	S2	NA	S2	Clamp1,RNAi3	remap2022_GSE119708.Clamp.Schneider-2_Clamp1_RNAi3:FBgn0032979_SRR7813068	remap2022_GSE119708.Input.Clamp.Schneider-2_Clamp1_RNAi3:FBgn0032979_SRR7813078
GSE119708.Clamp.Schneider-2_Clamp2_RNAi2:FBgn0032979	GSE119708	Clamp	FBgn0032979	Schneider-2	S2	S2	NA	S2	Clamp2,RNAi2	remap2022_GSE119708.Clamp.Schneider-2_Clamp2_RNAi2:FBgn0032979_SRR7813069	remap2022_GSE119708.Input.Clamp.Schneider-2_Clamp2_RNAi2:FBgn0032979_SRR7813079
GSE119708.Clamp.Schneider-2_Clamp2_RNAi3:FBgn0032979	GSE119708	Clamp	FBgn0032979	Schneider-2	S2	S2	NA	S2	Clamp2,RNAi3	remap2022_GSE119708.Clamp.Schneider-2_Clamp2_RNAi3:FBgn0032979_SRR7813070	remap2022_GSE119708.Input.Clamp.Schneider-2_Clamp2_RNAi3:FBgn0032979_SRR7813080
GSE119708.Clamp.Schneider-2_Trl_RNAi1:FBgn0032979	GSE119708	Clamp	FBgn0032979	Schneider-2	S2	S2	NA	S2	Trl,RNAi1	remap2022_GSE119708.Clamp.Schneider-2_Trl_RNAi1:FBgn0032979_SRR7813074	remap2022_GSE119708.Input.Clamp.Schneider-2_Trl_RNAi1:FBgn0032979_SRR7813084
GSE119708.Clamp.Schneider-2_Trl_RNAi2:FBgn0032979	GSE119708	Clamp	FBgn0032979	Schneider-2	S2	S2	NA	S2	Trl,RNAi2	remap2022_GSE119708.Clamp.Schneider-2_Trl_RNAi2:FBgn0032979_SRR7813075	remap2022_GSE119708.Input.Clamp.Schneider-2_Trl_RNAi2:FBgn0032979_SRR7813085
GSE119708.Clamp.Schneider-2_Trl_RNAi3:FBgn0032979	GSE119708	Clamp	FBgn0032979	Schneider-2	S2	S2	NA	S2	Trl,RNAi3	remap2022_GSE119708.Clamp.Schneider-2_Trl_RNAi3:FBgn0032979_SRR7813076	remap2022_GSE119708.Input.Clamp.Schneider-2_Trl_RNAi3:FBgn0032979_SRR7813086
GSE119708.Clamp.Schneider-2_gst_RNAi1:FBgn0032979	GSE119708	Clamp	FBgn0032979	Schneider-2	S2	S2	NA	S2	gst,RNAi1	remap2022_GSE119708.Clamp.Schneider-2_gst_RNAi1:FBgn0032979_SRR7813071	remap2022_GSE119708.Input.Clamp.Schneider-2_gst_RNAi1:FBgn0032979_SRR7813081
GSE119708.Clamp.Schneider-2_gst_RNAi2:FBgn0032979	GSE119708	Clamp	FBgn0032979	Schneider-2	S2	S2	NA	S2	gst,RNAi2	remap2022_GSE119708.Clamp.Schneider-2_gst_RNAi2:FBgn0032979_SRR7813072	remap2022_GSE119708.Input.Clamp.Schneider-2_gst_RNAi2:FBgn0032979_SRR7813082
GSE119708.Clamp.Schneider-2_gst_RNAi3:FBgn0032979	GSE119708	Clamp	FBgn0032979	Schneider-2	S2	S2	NA	S2	gst,RNAi3	remap2022_GSE119708.Clamp.Schneider-2_gst_RNAi3:FBgn0032979_SRR7813073	remap2022_GSE119708.Input.Clamp.Schneider-2_gst_RNAi3:FBgn0032979_SRR7813083
GSE119708.msl-2.Schneider-2_Clamp1_RNAi1:FBgn0005616	GSE119708	msl-2	FBgn0005616	Schneider-2	S2	S2	NA	S2	Clamp1,RNAi1	remap2022_GSE119708.msl-2.Schneider-2_Clamp1_RNAi1:FBgn0005616_SRR7813087	remap2022_GSE119708.Input.msl-2.Schneider-2_Clamp1_RNAi1:FBgn0005616_SRR7813077
GSE119708.msl-2.Schneider-2_Clamp1_RNAi3:FBgn0005616	GSE119708	msl-2	FBgn0005616	Schneider-2	S2	S2	NA	S2	Clamp1,RNAi3	remap2022_GSE119708.msl-2.Schneider-2_Clamp1_RNAi3:FBgn0005616_SRR7813088	remap2022_GSE119708.Input.msl-2.Schneider-2_Clamp1_RNAi3:FBgn0005616_SRR7813078
GSE119708.msl-2.Schneider-2_Clamp2_RNAi2:FBgn0005616	GSE119708	msl-2	FBgn0005616	Schneider-2	S2	S2	NA	S2	Clamp2,RNAi2	remap2022_GSE119708.msl-2.Schneider-2_Clamp2_RNAi2:FBgn0005616_SRR7813089	remap2022_GSE119708.Input.msl-2.Schneider-2_Clamp2_RNAi2:FBgn0005616_SRR7813079
GSE119708.msl-2.Schneider-2_Clamp2_RNAi3:FBgn0005616	GSE119708	msl-2	FBgn0005616	Schneider-2	S2	S2	NA	S2	Clamp2,RNAi3	remap2022_GSE119708.msl-2.Schneider-2_Clamp2_RNAi3:FBgn0005616_SRR7813090	remap2022_GSE119708.Input.msl-2.Schneider-2_Clamp2_RNAi3:FBgn0005616_SRR7813080
GSE119708.msl-2.Schneider-2_Trl_RNAi1:FBgn0005616	GSE119708	msl-2	FBgn0005616	Schneider-2	S2	S2	NA	S2	Trl,RNAi1	remap2022_GSE119708.msl-2.Schneider-2_Trl_RNAi1:FBgn0005616_SRR7813094	remap2022_GSE119708.Input.msl-2.Schneider-2_Trl_RNAi1:FBgn0005616_SRR7813084
GSE119708.msl-2.Schneider-2_Trl_RNAi2:FBgn0005616	GSE119708	msl-2	FBgn0005616	Schneider-2	S2	S2	NA	S2	Trl,RNAi2	remap2022_GSE119708.msl-2.Schneider-2_Trl_RNAi2:FBgn0005616_SRR7813095	remap2022_GSE119708.Input.msl-2.Schneider-2_Trl_RNAi2:FBgn0005616_SRR7813085
GSE119708.msl-2.Schneider-2_Trl_RNAi3:FBgn0005616	GSE119708	msl-2	FBgn0005616	Schneider-2	S2	S2	NA	S2	Trl,RNAi3	remap2022_GSE119708.msl-2.Schneider-2_Trl_RNAi3:FBgn0005616_SRR7813096	remap2022_GSE119708.Input.msl-2.Schneider-2_Trl_RNAi3:FBgn0005616_SRR7813086
GSE119708.msl-2.Schneider-2_gst_RNAi1:FBgn0005616	GSE119708	msl-2	FBgn0005616	Schneider-2	S2	S2	NA	S2	gst,RNAi1	remap2022_GSE119708.msl-2.Schneider-2_gst_RNAi1:FBgn0005616_SRR7813091	remap2022_GSE119708.Input.msl-2.Schneider-2_gst_RNAi1:FBgn0005616_SRR7813081
GSE119708.msl-2.Schneider-2_gst_RNAi2:FBgn0005616	GSE119708	msl-2	FBgn0005616	Schneider-2	S2	S2	NA	S2	gst,RNAi2	remap2022_GSE119708.msl-2.Schneider-2_gst_RNAi2:FBgn0005616_SRR7813092	remap2022_GSE119708.Input.msl-2.Schneider-2_gst_RNAi2:FBgn0005616_SRR7813082
GSE119708.msl-2.Schneider-2_gst_RNAi3:FBgn0005616	GSE119708	msl-2	FBgn0005616	Schneider-2	S2	S2	NA	S2	gst,RNAi3	remap2022_GSE119708.msl-2.Schneider-2_gst_RNAi3:FBgn0005616_SRR7813093	remap2022_GSE119708.Input.msl-2.Schneider-2_gst_RNAi3:FBgn0005616_SRR7813083
GSE119777.AGO2.adult_head_FLAG:FBgn0087035	GSE119777	AGO2	FBgn0087035	adult	adult	head	NA	adult.head	head,FLAG	remap2022_GSE119777.AGO2.adult_head_FLAG:FBgn0087035_SRR7817550,remap2022_GSE119777.AGO2.adult_head_FLAG:FBgn0087035_SRR7817551	remap2022_GSE119777.Input.AGO2.adult_head_FLAG:FBgn0087035_SRR7817583,remap2022_GSE119777.Input.AGO2.adult_head_FLAG:FBgn0087035_SRR7817584
GSE119777.Su-var-205.adult_head_AGO2-mut:FBgn0003607	GSE119777	Su-var-205	FBgn0003607	adult	adult	head	NA	adult.head	head,AGO2-mut	remap2022_GSE119777.Su-var-205.adult_head_AGO2-mut:FBgn0003607_SRR7817543,remap2022_GSE119777.Su-var-205.adult_head_AGO2-mut:FBgn0003607_SRR7817544	remap2022_GSE119777.Input.Su-var-205.adult_head_AGO2-mut:FBgn0003607_SRR7817576,remap2022_GSE119777.Input.Su-var-205.adult_head_AGO2-mut:FBgn0003607_SRR7817577
GSE119777.Su-var-205.adult_head_Top3b26:FBgn0003607	GSE119777	Su-var-205	FBgn0003607	adult	adult	head	NA	adult.head	head,Top3b26	remap2022_GSE119777.Su-var-205.adult_head_Top3b26:FBgn0003607_SRR7817545,remap2022_GSE119777.Su-var-205.adult_head_Top3b26:FBgn0003607_SRR7817546,remap2022_GSE119777.Su-var-205.adult_head_Top3b26:FBgn0003607_SRR7817547	remap2022_GSE119777.Input.Su-var-205.adult_head_Top3b26:FBgn0003607_SRR7817578,remap2022_GSE119777.Input.Su-var-205.adult_head_Top3b26:FBgn0003607_SRR7817579,remap2022_GSE119777.Input.Su-var-205.adult_head_Top3b26:FBgn0003607_SRR7817580
GSE119777.Su-var-205.adult_head_Top3b26_AGO2-mut:FBgn0003607	GSE119777	Su-var-205	FBgn0003607	adult	adult	head	NA	adult.head	head,Top3b26,AGO2-mut	remap2022_GSE119777.Su-var-205.adult_head_Top3b26_AGO2-mut:FBgn0003607_SRR7817548,remap2022_GSE119777.Su-var-205.adult_head_Top3b26_AGO2-mut:FBgn0003607_SRR7817549	remap2022_GSE119777.Input.Su-var-205.adult_head_Top3b26_AGO2-mut:FBgn0003607_SRR7817581,remap2022_GSE119777.Input.Su-var-205.adult_head_Top3b26_AGO2-mut:FBgn0003607_SRR7817582
GSE119777.Su-var-205.adult_head_Top3bWT_complementation:FBgn0003607	GSE119777	Su-var-205	FBgn0003607	adult	adult	head	NA	adult.head	head,Top3bWT,complementation	remap2022_GSE119777.Su-var-205.adult_head_Top3bWT_complementation:FBgn0003607_SRR7817570	remap2022_GSE119777.Input.Su-var-205.adult_head_Top3bWT_complementation:FBgn0003607_SRR7817592
GSE119777.Su-var-205.adult_head_Top3bY332F_complementation:FBgn0003607	GSE119777	Su-var-205	FBgn0003607	adult	adult	head	NA	adult.head	head,Top3bY332F,complementation	remap2022_GSE119777.Su-var-205.adult_head_Top3bY332F_complementation:FBgn0003607_SRR7817571	remap2022_GSE119777.Input.Su-var-205.adult_head_Top3bY332F_complementation:FBgn0003607_SRR7817593
GSE119777.Su-var-205.adult_head_Top3bdRGG_complementation:FBgn0003607	GSE119777	Su-var-205	FBgn0003607	adult	adult	head	NA	adult.head	head,Top3bdRGG,complementation	remap2022_GSE119777.Su-var-205.adult_head_Top3bdRGG_complementation:FBgn0003607_SRR7817572	remap2022_GSE119777.Input.Su-var-205.adult_head_Top3bdRGG_complementation:FBgn0003607_SRR7817594
GSE119777.Su-var-205.adult_head_w1118:FBgn0003607	GSE119777	Su-var-205	FBgn0003607	adult	adult	head	NA	adult.head	head,w1118	remap2022_GSE119777.Su-var-205.adult_head_w1118:FBgn0003607_SRR7817540,remap2022_GSE119777.Su-var-205.adult_head_w1118:FBgn0003607_SRR7817541,remap2022_GSE119777.Su-var-205.adult_head_w1118:FBgn0003607_SRR7817542	remap2022_GSE119777.Input.Su-var-205.adult_head_w1118:FBgn0003607_SRR7817573,remap2022_GSE119777.Input.Su-var-205.adult_head_w1118:FBgn0003607_SRR7817574,remap2022_GSE119777.Input.Su-var-205.adult_head_w1118:FBgn0003607_SRR7817575
GSE119777.Su-var-205.adult_head_w1118_complementation:FBgn0003607	GSE119777	Su-var-205	FBgn0003607	adult	adult	head	NA	adult.head	head,w1118,complementation	remap2022_GSE119777.Su-var-205.adult_head_w1118_complementation:FBgn0003607_SRR7817568	remap2022_GSE119777.Input.Su-var-205.adult_head_w1118_complementation:FBgn0003607_SRR7817590
GSE120880.mago.S2R-plus:FBgn0002736	GSE120880	mago	FBgn0002736	S2R-plus:FBgn0002736	S2	S2	NA	S2		remap2022_GSE120880.mago.S2R-plus:FBgn0002736_SRR7968391,remap2022_GSE120880.mago.S2R-plus:FBgn0002736_SRR7968392	remap2022_GSE120880.Input.mago.S2R-plus:FBgn0002736_SRR7968385
GSE120880.mago.S2R-plus_mago-KO:FBgn0002736	GSE120880	mago	FBgn0002736	S2R-plus	S2	S2	NA	S2	mago-KO	remap2022_GSE120880.mago.S2R-plus_mago-KO:FBgn0002736_SRR7968395,remap2022_GSE120880.mago.S2R-plus_mago-KO:FBgn0002736_SRR7968396	remap2022_GSE120880.Input.mago.S2R-plus_mago-KO:FBgn0002736_SRR7968386
GSE121102.foxo.adult_whole-fly_young:FBgn0038197	GSE121102	foxo	FBgn0038197	adult	adult	whole-fly	NA	adult.whole-fly	whole-fly,young	remap2022_GSE121102.foxo.adult_whole-fly_young:FBgn0038197_SRR7997149,remap2022_GSE121102.foxo.adult_whole-fly_young:FBgn0038197_SRR7997150	remap2022_GSE121102.Input.foxo.adult_whole-fly_young:FBgn0038197_SRR7997151,remap2022_GSE121102.Input.foxo.adult_whole-fly_young:FBgn0038197_SRR7997152
GSE122573.Abd-B.Kc167_Homothorax_stable:FBgn0000015	GSE122573	Abd-B	FBgn0000015	Kc167	Kc	Kc	NA	Kc	Homothorax,stable	remap2022_GSE122573.Abd-B.Kc167_Homothorax_stable:FBgn0000015_SRR8191485,remap2022_GSE122573.Abd-B.Kc167_Homothorax_stable:FBgn0000015_SRR8191486	remap2022_GSE122573.Input.Abd-B.Kc167_Homothorax_stable:FBgn0000015_SRR8191487
GSE122573.Abd-B.Kc167_stable:FBgn0000015	GSE122573	Abd-B	FBgn0000015	Kc167	Kc	Kc	NA	Kc	stable	remap2022_GSE122573.Abd-B.Kc167_stable:FBgn0000015_SRR8191482,remap2022_GSE122573.Abd-B.Kc167_stable:FBgn0000015_SRR8191483	remap2022_GSE122573.Input.Abd-B.Kc167_stable:FBgn0000015_SRR8191484
GSE122573.Dfd.Kc167_Gcm:FBgn0000439	GSE122573	Dfd	FBgn0000439	Kc167	Kc	Kc	NA	Kc	Gcm	remap2022_GSE122573.Dfd.Kc167_Gcm:FBgn0000439_SRR8191464,remap2022_GSE122573.Dfd.Kc167_Gcm:FBgn0000439_SRR8191465	remap2022_GSE122573.Input.Dfd.Kc167_Gcm:FBgn0000439_SRR8191466
GSE122573.Dfd.Kc167_Homothorax:FBgn0000439	GSE122573	Dfd	FBgn0000439	Kc167	Kc	Kc	NA	Kc	Homothorax	remap2022_GSE122573.Dfd.Kc167_Homothorax:FBgn0000439_SRR8191461,remap2022_GSE122573.Dfd.Kc167_Homothorax:FBgn0000439_SRR8191462	remap2022_GSE122573.Input.Dfd.Kc167_Homothorax:FBgn0000439_SRR8191463
GSE122573.Dfd.Kc167_Homothorax_Gcm:FBgn0000439	GSE122573	Dfd	FBgn0000439	Kc167	Kc	Kc	NA	Kc	Homothorax,Gcm	remap2022_GSE122573.Dfd.Kc167_Homothorax_Gcm:FBgn0000439_SRR8191467,remap2022_GSE122573.Dfd.Kc167_Homothorax_Gcm:FBgn0000439_SRR8191468	remap2022_GSE122573.Input.Dfd.Kc167_Homothorax_Gcm:FBgn0000439_SRR8191469
GSE122573.Dfd.Kc167_stable:FBgn0000439	GSE122573	Dfd	FBgn0000439	Kc167	Kc	Kc	NA	Kc	stable	remap2022_GSE122573.Dfd.Kc167_stable:FBgn0000439_SRR8191458,remap2022_GSE122573.Dfd.Kc167_stable:FBgn0000439_SRR8191459	remap2022_GSE122573.Input.Dfd.Kc167_stable:FBgn0000439_SRR8191460
GSE122573.Ubx.Kc167_Gcm:FBgn0003944	GSE122573	Ubx	FBgn0003944	Kc167	Kc	Kc	NA	Kc	Gcm	remap2022_GSE122573.Ubx.Kc167_Gcm:FBgn0003944_SRR8191476,remap2022_GSE122573.Ubx.Kc167_Gcm:FBgn0003944_SRR8191477	remap2022_GSE122573.Input.Ubx.Kc167_Gcm:FBgn0003944_SRR8191478
GSE122573.Ubx.Kc167_Homothorax:FBgn0003944	GSE122573	Ubx	FBgn0003944	Kc167	Kc	Kc	NA	Kc	Homothorax	remap2022_GSE122573.Ubx.Kc167_Homothorax:FBgn0003944_SRR8191473,remap2022_GSE122573.Ubx.Kc167_Homothorax:FBgn0003944_SRR8191474	remap2022_GSE122573.Input.Ubx.Kc167_Homothorax:FBgn0003944_SRR8191475
GSE122573.Ubx.Kc167_Homothorax_Gcm:FBgn0003944	GSE122573	Ubx	FBgn0003944	Kc167	Kc	Kc	NA	Kc	Homothorax,Gcm	remap2022_GSE122573.Ubx.Kc167_Homothorax_Gcm:FBgn0003944_SRR8191479,remap2022_GSE122573.Ubx.Kc167_Homothorax_Gcm:FBgn0003944_SRR8191480	remap2022_GSE122573.Input.Ubx.Kc167_Homothorax_Gcm:FBgn0003944_SRR8191481
GSE122573.Ubx.Kc167_stable:FBgn0003944	GSE122573	Ubx	FBgn0003944	Kc167	Kc	Kc	NA	Kc	stable	remap2022_GSE122573.Ubx.Kc167_stable:FBgn0003944_SRR8191470,remap2022_GSE122573.Ubx.Kc167_stable:FBgn0003944_SRR8191471	remap2022_GSE122573.Input.Ubx.Kc167_stable:FBgn0003944_SRR8191472
GSE122573.gcm.Kc167_stable:FBgn0014179	GSE122573	gcm	FBgn0014179	Kc167	Kc	Kc	NA	Kc	stable	remap2022_GSE122573.gcm.Kc167_stable:FBgn0014179_SRR8191488,remap2022_GSE122573.gcm.Kc167_stable:FBgn0014179_SRR8191489	remap2022_GSE122573.Input.gcm.Kc167_stable:FBgn0014179_SRR8191490
GSE122573.hth.Kc167_stable:FBgn0001235	GSE122573	hth	FBgn0001235	Kc167	Kc	Kc	NA	Kc	stable	remap2022_GSE122573.hth.Kc167_stable:FBgn0001235_SRR8191491,remap2022_GSE122573.hth.Kc167_stable:FBgn0001235_SRR8191492	remap2022_GSE122573.Input.hth.Kc167_stable:FBgn0001235_SRR8191493
GSE122574.Abd-B.Kc167:FBgn0000015	GSE122574	Abd-B	FBgn0000015	Kc167:FBgn0000015	Kc	Kc	NA	Kc		remap2022_GSE122574.Abd-B.Kc167:FBgn0000015_SRR8191536,remap2022_GSE122574.Abd-B.Kc167:FBgn0000015_SRR8191537	remap2022_GSE122574.Input.Abd-B.Kc167:FBgn0000015_SRR8191538
GSE122574.Antp.Kc167:FBgn0260642	GSE122574	Antp	FBgn0260642	Kc167:FBgn0260642	Kc	Kc	NA	Kc		remap2022_GSE122574.Antp.Kc167:FBgn0260642_SRR8191518,remap2022_GSE122574.Antp.Kc167:FBgn0260642_SRR8191519	remap2022_GSE122574.Input.Antp.Kc167:FBgn0260642_SRR8191520
GSE122574.Antp.Kc167_Hth:FBgn0260642	GSE122574	Antp	FBgn0260642	Kc167	Kc	Kc	NA	Kc	Hth	remap2022_GSE122574.Antp.Kc167_Hth:FBgn0260642_SRR8191521,remap2022_GSE122574.Antp.Kc167_Hth:FBgn0260642_SRR8191522	remap2022_GSE122574.Input.Antp.Kc167_Hth:FBgn0260642_SRR8191523
GSE122574.Dfd.Kc167:FBgn0000439	GSE122574	Dfd	FBgn0000439	Kc167:FBgn0000439	Kc	Kc	NA	Kc		remap2022_GSE122574.Dfd.Kc167:FBgn0000439_SRR8191506,remap2022_GSE122574.Dfd.Kc167:FBgn0000439_SRR8191507	remap2022_GSE122574.Input.Dfd.Kc167:FBgn0000439_SRR8191508
GSE122574.Dfd.Kc167_Hth:FBgn0000439	GSE122574	Dfd	FBgn0000439	Kc167	Kc	Kc	NA	Kc	Hth	remap2022_GSE122574.Dfd.Kc167_Hth:FBgn0000439_SRR8191509,remap2022_GSE122574.Dfd.Kc167_Hth:FBgn0000439_SRR8191510	remap2022_GSE122574.Input.Dfd.Kc167_Hth:FBgn0000439_SRR8191511
GSE122574.Scr.Kc167:FBgn0003339	GSE122574	Scr	FBgn0003339	Kc167:FBgn0003339	Kc	Kc	NA	Kc		remap2022_GSE122574.Scr.Kc167:FBgn0003339_SRR8191512,remap2022_GSE122574.Scr.Kc167:FBgn0003339_SRR8191513	remap2022_GSE122574.Input.Scr.Kc167:FBgn0003339_SRR8191514
GSE122574.Scr.Kc167_Hth:FBgn0003339	GSE122574	Scr	FBgn0003339	Kc167	Kc	Kc	NA	Kc	Hth	remap2022_GSE122574.Scr.Kc167_Hth:FBgn0003339_SRR8191515,remap2022_GSE122574.Scr.Kc167_Hth:FBgn0003339_SRR8191516	remap2022_GSE122574.Input.Scr.Kc167_Hth:FBgn0003339_SRR8191517
GSE122574.Ubx.Kc167:FBgn0003944	GSE122574	Ubx	FBgn0003944	Kc167:FBgn0003944	Kc	Kc	NA	Kc		remap2022_GSE122574.Ubx.Kc167:FBgn0003944_SRR8191524,remap2022_GSE122574.Ubx.Kc167:FBgn0003944_SRR8191525	remap2022_GSE122574.Input.Ubx.Kc167:FBgn0003944_SRR8191526
GSE122574.Ubx.Kc167_Hth:FBgn0003944	GSE122574	Ubx	FBgn0003944	Kc167	Kc	Kc	NA	Kc	Hth	remap2022_GSE122574.Ubx.Kc167_Hth:FBgn0003944_SRR8191527,remap2022_GSE122574.Ubx.Kc167_Hth:FBgn0003944_SRR8191528	remap2022_GSE122574.Input.Ubx.Kc167_Hth:FBgn0003944_SRR8191529
GSE122574.abd-A.Kc167:FBgn0000014	GSE122574	abd-A	FBgn0000014	Kc167:FBgn0000014	Kc	Kc	NA	Kc		remap2022_GSE122574.abd-A.Kc167:FBgn0000014_SRR8191530,remap2022_GSE122574.abd-A.Kc167:FBgn0000014_SRR8191531	remap2022_GSE122574.Input.abd-A.Kc167:FBgn0000014_SRR8191532
GSE122574.abd-A.Kc167_Hth:FBgn0000014	GSE122574	abd-A	FBgn0000014	Kc167	Kc	Kc	NA	Kc	Hth	remap2022_GSE122574.abd-A.Kc167_Hth:FBgn0000014_SRR8191533,remap2022_GSE122574.abd-A.Kc167_Hth:FBgn0000014_SRR8191534	remap2022_GSE122574.Input.abd-A.Kc167_Hth:FBgn0000014_SRR8191535
GSE122574.exd.Kc167_Hth:FBgn0000611	GSE122574	exd	FBgn0000611	Kc167	Kc	Kc	NA	Kc	Hth	remap2022_GSE122574.exd.Kc167_Hth:FBgn0000611_SRR8191545,remap2022_GSE122574.exd.Kc167_Hth:FBgn0000611_SRR8191546	remap2022_GSE122574.Input.exd.Kc167_Hth:FBgn0000611_SRR8191547
GSE122574.hth.Kc167:FBgn0001235	GSE122574	hth	FBgn0001235	Kc167:FBgn0001235	Kc	Kc	NA	Kc		remap2022_GSE122574.hth.Kc167:FBgn0001235_SRR8191542,remap2022_GSE122574.hth.Kc167:FBgn0001235_SRR8191543	remap2022_GSE122574.Input.hth.Kc167:FBgn0001235_SRR8191544
GSE122574.lab.Kc167:FBgn0002522	GSE122574	lab	FBgn0002522	Kc167:FBgn0002522	Kc	Kc	NA	Kc		remap2022_GSE122574.lab.Kc167:FBgn0002522_SRR8191494,remap2022_GSE122574.lab.Kc167:FBgn0002522_SRR8191495	remap2022_GSE122574.Input.lab.Kc167:FBgn0002522_SRR8191496
GSE122574.lab.Kc167_Hth:FBgn0002522	GSE122574	lab	FBgn0002522	Kc167	Kc	Kc	NA	Kc	Hth	remap2022_GSE122574.lab.Kc167_Hth:FBgn0002522_SRR8191497,remap2022_GSE122574.lab.Kc167_Hth:FBgn0002522_SRR8191498	remap2022_GSE122574.Input.lab.Kc167_Hth:FBgn0002522_SRR8191499
GSE122574.pb.Kc167:FBgn0051481	GSE122574	pb	FBgn0051481	Kc167:FBgn0051481	Kc	Kc	NA	Kc		remap2022_GSE122574.pb.Kc167:FBgn0051481_SRR8191500,remap2022_GSE122574.pb.Kc167:FBgn0051481_SRR8191501	remap2022_GSE122574.Input.pb.Kc167:FBgn0051481_SRR8191502
GSE122574.pb.Kc167_Hth:FBgn0051481	GSE122574	pb	FBgn0051481	Kc167	Kc	Kc	NA	Kc	Hth	remap2022_GSE122574.pb.Kc167_Hth:FBgn0051481_SRR8191503,remap2022_GSE122574.pb.Kc167_Hth:FBgn0051481_SRR8191504	remap2022_GSE122574.Input.pb.Kc167_Hth:FBgn0051481_SRR8191505
GSE122810.EcR.Schneider-2:FBgn0000546	GSE122810	EcR	FBgn0000546	Schneider-2:FBgn0000546	S2	S2	NA	S2		remap2022_GSE122810.EcR.Schneider-2:FBgn0000546_SRR8234810	remap2022_GSE122810.Input.EcR.Schneider-2:FBgn0000546_SRR8234812
GSE125604.EcR.adult_wing:FBgn0000546	GSE125604	EcR	FBgn0000546	adult	adult	wing	NA	adult.wing	wing	remap2022_GSE125604.EcR.adult_wing:FBgn0000546_SRR8483055,remap2022_GSE125604.EcR.adult_wing:FBgn0000546_SRR8483059	remap2022_GSE125604.Input.EcR.adult_wing:FBgn0000546_SRR8483056,remap2022_GSE125604.Input.EcR.adult_wing:FBgn0000546_SRR8483060
GSE125604.hth.adult_wing:FBgn0001235	GSE125604	hth	FBgn0001235	adult	adult	wing	NA	adult.wing	wing	remap2022_GSE125604.hth.adult_wing:FBgn0001235_SRR8483065	remap2022_GSE125604.Input.hth.adult_wing:FBgn0001235_SRR8483066
GSE126985.Psc.third-instar_eye-disc:FBgn0005624	GSE126985	Psc	FBgn0005624	third-instar	third_instar_larva	eye-disc	NA	third_instar_larva.eye-disc	eye-disc	remap2022_GSE126985.Psc.third-instar_eye-disc:FBgn0005624_SRR8617263,remap2022_GSE126985.Psc.third-instar_eye-disc:FBgn0005624_SRR8617264	remap2022_GSE126985.Input.Psc.third-instar_eye-disc:FBgn0005624_SRR8617257r1-SRR8617257r2,remap2022_GSE126985.Input.Psc.third-instar_eye-disc:FBgn0005624_SRR8617258r1-SRR8617258r2
GSE126985.Su-z-12.third-instar_eye-disc:FBgn0020887	GSE126985	Su-z-12	FBgn0020887	third-instar	third_instar_larva	eye-disc	NA	third_instar_larva.eye-disc	eye-disc	remap2022_GSE126985.Su-z-12.third-instar_eye-disc:FBgn0020887_SRR8617265,remap2022_GSE126985.Su-z-12.third-instar_eye-disc:FBgn0020887_SRR8617266	remap2022_GSE126985.Input.Su-z-12.third-instar_eye-disc:FBgn0020887_SRR8617259,remap2022_GSE126985.Input.Su-z-12.third-instar_eye-disc:FBgn0020887_SRR8617260
GSE128455.Jasper.Kc:FBgn0039743	GSE128455	Jasper	FBgn0039743	Kc:FBgn0039743	Kc	Kc	NA	Kc		remap2022_GSE128455.Jasper.Kc:FBgn0039743_SRR8956997,remap2022_GSE128455.Jasper.Kc:FBgn0039743_SRR8956998,remap2022_GSE128455.Jasper.Kc:FBgn0039743_SRR8956999	remap2022_GSE128455.Input.Jasper.Kc:FBgn0039743_SRR8743299
GSE128455.Jasper.Schneider-2:FBgn0039743	GSE128455	Jasper	FBgn0039743	Schneider-2:FBgn0039743	S2	S2	NA	S2		remap2022_GSE128455.Jasper.Schneider-2:FBgn0039743_SRR8957000,remap2022_GSE128455.Jasper.Schneider-2:FBgn0039743_SRR8957001,remap2022_GSE128455.Jasper.Schneider-2:FBgn0039743_SRR8957002,remap2022_GSE128455.Jasper.Schneider-2:FBgn0039743_SRR8957003	remap2022_GSE128455.Input.Jasper.Schneider-2:FBgn0039743_SRR8743309,remap2022_GSE128455.Input.Jasper.Schneider-2:FBgn0039743_SRR8743310,remap2022_GSE128455.Input.Jasper.Schneider-2:FBgn0039743_SRR8743311,remap2022_GSE128455.Input.Jasper.Schneider-2:FBgn0039743_SRR8743312,remap2022_GSE128455.Input.Jasper.Schneider-2:FBgn0039743_SRR8743313
GSE128456.Jasper.Schneider-2:FBgn0039743	GSE128456	Jasper	FBgn0039743	Schneider-2:FBgn0039743	S2	S2	NA	S2		remap2022_GSE128456.Jasper.Schneider-2:FBgn0039743_SRR8957017,remap2022_GSE128456.Jasper.Schneider-2:FBgn0039743_SRR8957018
GSE129795.msl-2.third-instar_male:FBgn0005616	GSE129795	msl-2	FBgn0005616	third-instar	third_instar_larva	whole_larva	NA	third_instar_larva.whole_larva	male	remap2022_GSE129795.msl-2.third-instar_male:FBgn0005616_SRR8895571r1-SRR8895571r2,remap2022_GSE129795.msl-2.third-instar_male:FBgn0005616_SRR8895572r1-SRR8895572r2	remap2022_GSE129795.Input.msl-2.third-instar_male:FBgn0005616_SRR8895573r1-SRR8895573r2,remap2022_GSE129795.Input.msl-2.third-instar_male:FBgn0005616_SRR8895574r1-SRR8895574r2
GSE130112.Jasper.Schneider-2_GFP:FBgn0039743	GSE130112	Jasper	FBgn0039743	Schneider-2	S2	S2	NA	S2	GFP	remap2022_GSE130112.Jasper.Schneider-2_GFP:FBgn0039743_SRR8936403	remap2022_GSE130112.Input.Jasper.Schneider-2_GFP:FBgn0039743_SRR8936397
GSE130112.Jasper.Schneider-2_GST:FBgn0039743	GSE130112	Jasper	FBgn0039743	Schneider-2	S2	S2	NA	S2	GST	remap2022_GSE130112.Jasper.Schneider-2_GST:FBgn0039743_SRR8936404,remap2022_GSE130112.Jasper.Schneider-2_GST:FBgn0039743_SRR8936405	remap2022_GSE130112.Input.Jasper.Schneider-2_GST:FBgn0039743_SRR8936398,remap2022_GSE130112.Input.Jasper.Schneider-2_GST:FBgn0039743_SRR8936399
GSE130112.Jasper.Schneider-2_JIL1:FBgn0039743	GSE130112	Jasper	FBgn0039743	Schneider-2	S2	S2	NA	S2	JIL1	remap2022_GSE130112.Jasper.Schneider-2_JIL1:FBgn0039743_SRR8936406	remap2022_GSE130112.Input.Jasper.Schneider-2_JIL1:FBgn0039743_SRR8936400
GSE130112.Jasper.Schneider-2_JIL2:FBgn0039743	GSE130112	Jasper	FBgn0039743	Schneider-2	S2	S2	NA	S2	JIL2	remap2022_GSE130112.Jasper.Schneider-2_JIL2:FBgn0039743_SRR8936407,remap2022_GSE130112.Jasper.Schneider-2_JIL2:FBgn0039743_SRR8936408	remap2022_GSE130112.Input.Jasper.Schneider-2_JIL2:FBgn0039743_SRR8936401,remap2022_GSE130112.Input.Jasper.Schneider-2_JIL2:FBgn0039743_SRR8936402
GSE130584.cic.embryo_OptoSOS_1min:FBgn0262582	GSE130584	cic	FBgn0262582	embryo	embryo	whole_embryo	NA	embryo.whole_embryo	OptoSOS,1min	remap2022_GSE130584.cic.embryo_OptoSOS_1min:FBgn0262582_SRR8997120,remap2022_GSE130584.cic.embryo_OptoSOS_1min:FBgn0262582_SRR8997121	remap2022_GSE130584.Input.cic.embryo_OptoSOS_1min:FBgn0262582_SRR8997122,remap2022_GSE130584.Input.cic.embryo_OptoSOS_1min:FBgn0262582_SRR8997123
GSE130584.cic.embryo_OptoSOS_30min:FBgn0262582	GSE130584	cic	FBgn0262582	embryo	embryo	whole_embryo	NA	embryo.whole_embryo	OptoSOS,30min	remap2022_GSE130584.cic.embryo_OptoSOS_30min:FBgn0262582_SRR8997130,remap2022_GSE130584.cic.embryo_OptoSOS_30min:FBgn0262582_SRR8997131,remap2022_GSE130584.cic.embryo_OptoSOS_30min:FBgn0262582_SRR8997132	remap2022_GSE130584.Input.cic.embryo_OptoSOS_30min:FBgn0262582_SRR8997133,remap2022_GSE130584.Input.cic.embryo_OptoSOS_30min:FBgn0262582_SRR8997134,remap2022_GSE130584.Input.cic.embryo_OptoSOS_30min:FBgn0262582_SRR8997135
GSE130584.cic.embryo_OptoSOS_5min:FBgn0262582	GSE130584	cic	FBgn0262582	embryo	embryo	whole_embryo	NA	embryo.whole_embryo	OptoSOS,5min	remap2022_GSE130584.cic.embryo_OptoSOS_5min:FBgn0262582_SRR8997124,remap2022_GSE130584.cic.embryo_OptoSOS_5min:FBgn0262582_SRR8997125,remap2022_GSE130584.cic.embryo_OptoSOS_5min:FBgn0262582_SRR8997126	remap2022_GSE130584.Input.cic.embryo_OptoSOS_5min:FBgn0262582_SRR8997127,remap2022_GSE130584.Input.cic.embryo_OptoSOS_5min:FBgn0262582_SRR8997128,remap2022_GSE130584.Input.cic.embryo_OptoSOS_5min:FBgn0262582_SRR8997129
GSE130584.cic.embryo_OptoSOS_NoLight:FBgn0262582	GSE130584	cic	FBgn0262582	embryo	embryo	whole_embryo	NA	embryo.whole_embryo	OptoSOS,NoLight	remap2022_GSE130584.cic.embryo_OptoSOS_NoLight:FBgn0262582_SRR8997114,remap2022_GSE130584.cic.embryo_OptoSOS_NoLight:FBgn0262582_SRR8997115,remap2022_GSE130584.cic.embryo_OptoSOS_NoLight:FBgn0262582_SRR8997116	remap2022_GSE130584.Input.cic.embryo_OptoSOS_NoLight:FBgn0262582_SRR8997117,remap2022_GSE130584.Input.cic.embryo_OptoSOS_NoLight:FBgn0262582_SRR8997118,remap2022_GSE130584.Input.cic.embryo_OptoSOS_NoLight:FBgn0262582_SRR8997119
GSE130584.cic.embryo_TorD:FBgn0262582	GSE130584	cic	FBgn0262582	embryo	embryo	whole_embryo	NA	embryo.whole_embryo	TorD	remap2022_GSE130584.cic.embryo_TorD:FBgn0262582_SRR8997136,remap2022_GSE130584.cic.embryo_TorD:FBgn0262582_SRR8997137,remap2022_GSE130584.cic.embryo_TorD:FBgn0262582_SRR8997138	remap2022_GSE130584.Input.cic.embryo_TorD:FBgn0262582_SRR8997139,remap2022_GSE130584.Input.cic.embryo_TorD:FBgn0262582_SRR8997140,remap2022_GSE130584.Input.cic.embryo_TorD:FBgn0262582_SRR8997141
GSE130584.cic.embryo_early-nuclear-cycle-14:FBgn0262582	GSE130584	cic	FBgn0262582	embryo	embryo	whole_embryo	NA	embryo.whole_embryo	early-nuclear-cycle-14	remap2022_GSE130584.cic.embryo_early-nuclear-cycle-14:FBgn0262582_SRR8997108,remap2022_GSE130584.cic.embryo_early-nuclear-cycle-14:FBgn0262582_SRR8997109,remap2022_GSE130584.cic.embryo_early-nuclear-cycle-14:FBgn0262582_SRR8997110	remap2022_GSE130584.Input.cic.embryo_early-nuclear-cycle-14:FBgn0262582_SRR8997111,remap2022_GSE130584.Input.cic.embryo_early-nuclear-cycle-14:FBgn0262582_SRR8997112,remap2022_GSE130584.Input.cic.embryo_early-nuclear-cycle-14:FBgn0262582_SRR8997113
GSE131160.Elba1.embryo_2h-4h:FBgn0000227	GSE131160	Elba1	FBgn0000227	embryo	embryo	whole_embryo	2-4h	embryo.whole_embryo.2-4h	2h-4h	remap2022_GSE131160.Elba1.embryo_2h-4h:FBgn0000227_SRR9051584	remap2022_GSE131160.Input.Elba1.embryo_2h-4h:FBgn0000227_SRR9051597
GSE131160.Elba1.embryo_2h-4h_Elba2-mut:FBgn0000227	GSE131160	Elba1	FBgn0000227	embryo	embryo	whole_embryo	2-4h	embryo.whole_embryo.2-4h	2h-4h,Elba2-mut	remap2022_GSE131160.Elba1.embryo_2h-4h_Elba2-mut:FBgn0000227_SRR9051572	remap2022_GSE131160.Input.Elba1.embryo_2h-4h_Elba2-mut:FBgn0000227_SRR9051594
GSE131160.Elba1.embryo_2h-4h_Insv-mut:FBgn0000227	GSE131160	Elba1	FBgn0000227	embryo	embryo	whole_embryo	2-4h	embryo.whole_embryo.2-4h	2h-4h,Insv-mut	remap2022_GSE131160.Elba1.embryo_2h-4h_Insv-mut:FBgn0000227_SRR9051580	remap2022_GSE131160.Input.Elba1.embryo_2h-4h_Insv-mut:FBgn0000227_SRR9051596
GSE131160.Elba1.embryo_2h-4h_nexus:FBgn0000227	GSE131160	Elba1	FBgn0000227	embryo	embryo	whole_embryo	2-4h	embryo.whole_embryo.2-4h	2h-4h,nexus	remap2022_GSE131160.Elba1.embryo_2h-4h_nexus:FBgn0000227_SRR9051598r1-SRR9051598r2
GSE131160.Elba2.embryo_2h-4h:FBgn0031435	GSE131160	Elba2	FBgn0031435	embryo	embryo	whole_embryo	2-4h	embryo.whole_embryo.2-4h	2h-4h	remap2022_GSE131160.Elba2.embryo_2h-4h:FBgn0031435_SRR9051585	remap2022_GSE131160.Input.Elba2.embryo_2h-4h:FBgn0031435_SRR9051597
GSE131160.Elba2.embryo_2h-4h_Elba1-mut:FBgn0031435	GSE131160	Elba2	FBgn0031435	embryo	embryo	whole_embryo	2-4h	embryo.whole_embryo.2-4h	2h-4h,Elba1-mut	remap2022_GSE131160.Elba2.embryo_2h-4h_Elba1-mut:FBgn0031435_SRR9051569	remap2022_GSE131160.Input.Elba2.embryo_2h-4h_Elba1-mut:FBgn0031435_SRR9051593
GSE131160.Elba2.embryo_2h-4h_Elba2-mut:FBgn0031435	GSE131160	Elba2	FBgn0031435	embryo	embryo	whole_embryo	2-4h	embryo.whole_embryo.2-4h	2h-4h,Elba2-mut	remap2022_GSE131160.Elba2.embryo_2h-4h_Elba2-mut:FBgn0031435_SRR9051573	remap2022_GSE131160.Input.Elba2.embryo_2h-4h_Elba2-mut:FBgn0031435_SRR9051594
GSE131160.Elba2.embryo_2h-4h_Elba3-mut:FBgn0031435	GSE131160	Elba2	FBgn0031435	embryo	embryo	whole_embryo	2-4h	embryo.whole_embryo.2-4h	2h-4h,Elba3-mut	remap2022_GSE131160.Elba2.embryo_2h-4h_Elba3-mut:FBgn0031435_SRR9051577	remap2022_GSE131160.Input.Elba2.embryo_2h-4h_Elba3-mut:FBgn0031435_SRR9051595
GSE131160.Elba2.embryo_2h-4h_Insv-mut:FBgn0031435	GSE131160	Elba2	FBgn0031435	embryo	embryo	whole_embryo	2-4h	embryo.whole_embryo.2-4h	2h-4h,Insv-mut	remap2022_GSE131160.Elba2.embryo_2h-4h_Insv-mut:FBgn0031435_SRR9051581	remap2022_GSE131160.Input.Elba2.embryo_2h-4h_Insv-mut:FBgn0031435_SRR9051596
GSE131160.Elba2.embryo_2h-4h_nexus:FBgn0031435	GSE131160	Elba2	FBgn0031435	embryo	embryo	whole_embryo	2-4h	embryo.whole_embryo.2-4h	2h-4h,nexus	remap2022_GSE131160.Elba2.embryo_2h-4h_nexus:FBgn0031435_SRR9051599r1-SRR9051599r2
GSE131160.Elba3.embryo_2h-4h:FBgn0031621	GSE131160	Elba3	FBgn0031621	embryo	embryo	whole_embryo	2-4h	embryo.whole_embryo.2-4h	2h-4h	remap2022_GSE131160.Elba3.embryo_2h-4h:FBgn0031621_SRR9051586	remap2022_GSE131160.Input.Elba3.embryo_2h-4h:FBgn0031621_SRR9051597
GSE131160.Elba3.embryo_2h-4h_Elba1-mut:FBgn0031621	GSE131160	Elba3	FBgn0031621	embryo	embryo	whole_embryo	2-4h	embryo.whole_embryo.2-4h	2h-4h,Elba1-mut	remap2022_GSE131160.Elba3.embryo_2h-4h_Elba1-mut:FBgn0031621_SRR9051570	remap2022_GSE131160.Input.Elba3.embryo_2h-4h_Elba1-mut:FBgn0031621_SRR9051593
GSE131160.Elba3.embryo_2h-4h_Elba2-mut:FBgn0031621	GSE131160	Elba3	FBgn0031621	embryo	embryo	whole_embryo	2-4h	embryo.whole_embryo.2-4h	2h-4h,Elba2-mut	remap2022_GSE131160.Elba3.embryo_2h-4h_Elba2-mut:FBgn0031621_SRR9051574	remap2022_GSE131160.Input.Elba3.embryo_2h-4h_Elba2-mut:FBgn0031621_SRR9051594
GSE131160.Elba3.embryo_2h-4h_Elba3-mut:FBgn0031621	GSE131160	Elba3	FBgn0031621	embryo	embryo	whole_embryo	2-4h	embryo.whole_embryo.2-4h	2h-4h,Elba3-mut	remap2022_GSE131160.Elba3.embryo_2h-4h_Elba3-mut:FBgn0031621_SRR9051578	remap2022_GSE131160.Input.Elba3.embryo_2h-4h_Elba3-mut:FBgn0031621_SRR9051595
GSE131160.Elba3.embryo_2h-4h_Insv-mut:FBgn0031621	GSE131160	Elba3	FBgn0031621	embryo	embryo	whole_embryo	2-4h	embryo.whole_embryo.2-4h	2h-4h,Insv-mut	remap2022_GSE131160.Elba3.embryo_2h-4h_Insv-mut:FBgn0031621_SRR9051582	remap2022_GSE131160.Input.Elba3.embryo_2h-4h_Insv-mut:FBgn0031621_SRR9051596
GSE131160.Elba3.embryo_2h-4h_nexus:FBgn0031621	GSE131160	Elba3	FBgn0031621	embryo	embryo	whole_embryo	2-4h	embryo.whole_embryo.2-4h	2h-4h,nexus	remap2022_GSE131160.Elba3.embryo_2h-4h_nexus:FBgn0031621_SRR9051600r1-SRR9051600r2
GSE131160.insv.embryo_2h-4h:FBgn0031434	GSE131160	insv	FBgn0031434	embryo	embryo	whole_embryo	2-4h	embryo.whole_embryo.2-4h	2h-4h	remap2022_GSE131160.insv.embryo_2h-4h:FBgn0031434_SRR9051587	remap2022_GSE131160.Input.insv.embryo_2h-4h:FBgn0031434_SRR9051597
GSE131160.insv.embryo_2h-4h_Elba1-mut:FBgn0031434	GSE131160	insv	FBgn0031434	embryo	embryo	whole_embryo	2-4h	embryo.whole_embryo.2-4h	2h-4h,Elba1-mut	remap2022_GSE131160.insv.embryo_2h-4h_Elba1-mut:FBgn0031434_SRR9051571	remap2022_GSE131160.Input.insv.embryo_2h-4h_Elba1-mut:FBgn0031434_SRR9051593
GSE131160.insv.embryo_2h-4h_Elba2-mut:FBgn0031434	GSE131160	insv	FBgn0031434	embryo	embryo	whole_embryo	2-4h	embryo.whole_embryo.2-4h	2h-4h,Elba2-mut	remap2022_GSE131160.insv.embryo_2h-4h_Elba2-mut:FBgn0031434_SRR9051575	remap2022_GSE131160.Input.insv.embryo_2h-4h_Elba2-mut:FBgn0031434_SRR9051594
GSE131160.insv.embryo_2h-4h_Elba3-mut:FBgn0031434	GSE131160	insv	FBgn0031434	embryo	embryo	whole_embryo	2-4h	embryo.whole_embryo.2-4h	2h-4h,Elba3-mut	remap2022_GSE131160.insv.embryo_2h-4h_Elba3-mut:FBgn0031434_SRR9051579	remap2022_GSE131160.Input.insv.embryo_2h-4h_Elba3-mut:FBgn0031434_SRR9051595
GSE131160.insv.embryo_2h-4h_Insv-mut:FBgn0031434	GSE131160	insv	FBgn0031434	embryo	embryo	whole_embryo	2-4h	embryo.whole_embryo.2-4h	2h-4h,Insv-mut	remap2022_GSE131160.insv.embryo_2h-4h_Insv-mut:FBgn0031434_SRR9051583	remap2022_GSE131160.Input.insv.embryo_2h-4h_Insv-mut:FBgn0031434_SRR9051596
GSE131160.insv.embryo_2h-4h_nexus:FBgn0031434	GSE131160	insv	FBgn0031434	embryo	embryo	whole_embryo	2-4h	embryo.whole_embryo.2-4h	2h-4h,nexus	remap2022_GSE131160.insv.embryo_2h-4h_nexus:FBgn0031434_SRR9051601r1-SRR9051601r2
GSE133637.Clamp.embryo_female:FBgn0032979	GSE133637	Clamp	FBgn0032979	embryo	embryo	whole_embryo	NA	embryo.whole_embryo	female	remap2022_GSE133637.Clamp.embryo_female:FBgn0032979_SRR9624514r1-SRR9624514r2	remap2022_GSE133637.Input.Clamp.embryo_female:FBgn0032979_SRR9624512r1-SRR9624512r2
GSE133637.Clamp.embryo_female_NC11:FBgn0032979	GSE133637	Clamp	FBgn0032979	embryo	embryo	whole_embryo	NA	embryo.whole_embryo	female,NC11	remap2022_GSE133637.Clamp.embryo_female_NC11:FBgn0032979_SRR9624457	remap2022_GSE133637.Input.Clamp.embryo_female_NC11:FBgn0032979_SRR9624455
GSE133637.Clamp.embryo_female_NC12:FBgn0032979	GSE133637	Clamp	FBgn0032979	embryo	embryo	whole_embryo	NA	embryo.whole_embryo	female,NC12	remap2022_GSE133637.Clamp.embryo_female_NC12:FBgn0032979_SRR9624468,remap2022_GSE133637.Clamp.embryo_female_NC12:FBgn0032979_SRR9624469	remap2022_GSE133637.Input.Clamp.embryo_female_NC12:FBgn0032979_SRR9624464,remap2022_GSE133637.Input.Clamp.embryo_female_NC12:FBgn0032979_SRR9624465
GSE133637.Clamp.embryo_female_NC13:FBgn0032979	GSE133637	Clamp	FBgn0032979	embryo	embryo	whole_embryo	NA	embryo.whole_embryo	female,NC13	remap2022_GSE133637.Clamp.embryo_female_NC13:FBgn0032979_SRR9624484,remap2022_GSE133637.Clamp.embryo_female_NC13:FBgn0032979_SRR9624485	remap2022_GSE133637.Input.Clamp.embryo_female_NC13:FBgn0032979_SRR9624480,remap2022_GSE133637.Input.Clamp.embryo_female_NC13:FBgn0032979_SRR9624481
GSE133637.Clamp.embryo_female_NC14:FBgn0032979	GSE133637	Clamp	FBgn0032979	embryo	embryo	whole_embryo	NA	embryo.whole_embryo	female,NC14	remap2022_GSE133637.Clamp.embryo_female_NC14:FBgn0032979_SRR9624500,remap2022_GSE133637.Clamp.embryo_female_NC14:FBgn0032979_SRR9624501	remap2022_GSE133637.Input.Clamp.embryo_female_NC14:FBgn0032979_SRR9624496,remap2022_GSE133637.Input.Clamp.embryo_female_NC14:FBgn0032979_SRR9624497
GSE133637.Clamp.embryo_male_NC11:FBgn0032979	GSE133637	Clamp	FBgn0032979	embryo	embryo	whole_embryo	NA	embryo.whole_embryo	male,NC11	remap2022_GSE133637.Clamp.embryo_male_NC11:FBgn0032979_SRR9624461	remap2022_GSE133637.Input.Clamp.embryo_male_NC11:FBgn0032979_SRR9624459
GSE133637.Clamp.embryo_male_NC12:FBgn0032979	GSE133637	Clamp	FBgn0032979	embryo	embryo	whole_embryo	NA	embryo.whole_embryo	male,NC12	remap2022_GSE133637.Clamp.embryo_male_NC12:FBgn0032979_SRR9624475,remap2022_GSE133637.Clamp.embryo_male_NC12:FBgn0032979_SRR9624476	remap2022_GSE133637.Input.Clamp.embryo_male_NC12:FBgn0032979_SRR9624471,remap2022_GSE133637.Input.Clamp.embryo_male_NC12:FBgn0032979_SRR9624472
GSE133637.Clamp.embryo_male_NC13:FBgn0032979	GSE133637	Clamp	FBgn0032979	embryo	embryo	whole_embryo	NA	embryo.whole_embryo	male,NC13	remap2022_GSE133637.Clamp.embryo_male_NC13:FBgn0032979_SRR9624491,remap2022_GSE133637.Clamp.embryo_male_NC13:FBgn0032979_SRR9624492	remap2022_GSE133637.Input.Clamp.embryo_male_NC13:FBgn0032979_SRR9624487,remap2022_GSE133637.Input.Clamp.embryo_male_NC13:FBgn0032979_SRR9624488
GSE133637.Clamp.embryo_male_NC14:FBgn0032979	GSE133637	Clamp	FBgn0032979	embryo	embryo	whole_embryo	NA	embryo.whole_embryo	male,NC14	remap2022_GSE133637.Clamp.embryo_male_NC14:FBgn0032979_SRR9624507,remap2022_GSE133637.Clamp.embryo_male_NC14:FBgn0032979_SRR9624508	remap2022_GSE133637.Input.Clamp.embryo_male_NC14:FBgn0032979_SRR9624503,remap2022_GSE133637.Input.Clamp.embryo_male_NC14:FBgn0032979_SRR9624504
GSE133637.msl-3.embryo_male_NC13:FBgn0002775	GSE133637	msl-3	FBgn0002775	embryo	embryo	whole_embryo	NA	embryo.whole_embryo	male,NC13	remap2022_GSE133637.msl-3.embryo_male_NC13:FBgn0002775_SRR9624493,remap2022_GSE133637.msl-3.embryo_male_NC13:FBgn0002775_SRR9624494	remap2022_GSE133637.Input.msl-3.embryo_male_NC13:FBgn0002775_SRR9624487,remap2022_GSE133637.Input.msl-3.embryo_male_NC13:FBgn0002775_SRR9624488
GSE133637.msl-3.embryo_male_NC14:FBgn0002775	GSE133637	msl-3	FBgn0002775	embryo	embryo	whole_embryo	NA	embryo.whole_embryo	male,NC14	remap2022_GSE133637.msl-3.embryo_male_NC14:FBgn0002775_SRR9624509,remap2022_GSE133637.msl-3.embryo_male_NC14:FBgn0002775_SRR9624510	remap2022_GSE133637.Input.msl-3.embryo_male_NC14:FBgn0002775_SRR9624503,remap2022_GSE133637.Input.msl-3.embryo_male_NC14:FBgn0002775_SRR9624504
GSE135771.fs-1-h.Schneider-2:FBgn0004656	GSE135771	fs-1-h	FBgn0004656	Schneider-2:FBgn0004656	S2	S2	NA	S2		remap2022_GSE135771.fs-1-h.Schneider-2:FBgn0004656_SRR9960707r1-SRR9960707r2,remap2022_GSE135771.fs-1-h.Schneider-2:FBgn0004656_SRR9960711r1-SRR9960711r2	remap2022_GSE135771.Input.fs-1-h.Schneider-2:FBgn0004656_SRR9960699r1-SRR9960699r2,remap2022_GSE135771.Input.fs-1-h.Schneider-2:FBgn0004656_SRR9960703r1-SRR9960703r2
GSE135771.fs-1-h.Schneider-2_GST:FBgn0004656	GSE135771	fs-1-h	FBgn0004656	Schneider-2	S2	S2	NA	S2	GST	remap2022_GSE135771.fs-1-h.Schneider-2_GST:FBgn0004656_SRR9960708r1-SRR9960708r2,remap2022_GSE135771.fs-1-h.Schneider-2_GST:FBgn0004656_SRR9960712r1-SRR9960712r2	remap2022_GSE135771.Input.fs-1-h.Schneider-2_GST:FBgn0004656_SRR9960700r1-SRR9960700r2,remap2022_GSE135771.Input.fs-1-h.Schneider-2_GST:FBgn0004656_SRR9960704r1-SRR9960704r2
GSE135771.fs-1-h.Schneider-2_MOF:FBgn0004656	GSE135771	fs-1-h	FBgn0004656	Schneider-2	S2	S2	NA	S2	MOF	remap2022_GSE135771.fs-1-h.Schneider-2_MOF:FBgn0004656_SRR9960710r1-SRR9960710r2,remap2022_GSE135771.fs-1-h.Schneider-2_MOF:FBgn0004656_SRR9960714r1-SRR9960714r2	remap2022_GSE135771.Input.fs-1-h.Schneider-2_MOF:FBgn0004656_SRR9960702r1-SRR9960702r2,remap2022_GSE135771.Input.fs-1-h.Schneider-2_MOF:FBgn0004656_SRR9960706r1-SRR9960706r2
GSE135771.fs-1-h.Schneider-2_NSL1:FBgn0004656	GSE135771	fs-1-h	FBgn0004656	Schneider-2	S2	S2	NA	S2	NSL1	remap2022_GSE135771.fs-1-h.Schneider-2_NSL1:FBgn0004656_SRR9960709r1-SRR9960709r2,remap2022_GSE135771.fs-1-h.Schneider-2_NSL1:FBgn0004656_SRR9960713r1-SRR9960713r2	remap2022_GSE135771.Input.fs-1-h.Schneider-2_NSL1:FBgn0004656_SRR9960701r1-SRR9960701r2,remap2022_GSE135771.Input.fs-1-h.Schneider-2_NSL1:FBgn0004656_SRR9960705r1-SRR9960705r2
GSE135771.fs-1-h.Schneider-2_ab:FBgn0004656	GSE135771	fs-1-h	FBgn0004656	Schneider-2	S2	S2	NA	S2	ab	remap2022_GSE135771.fs-1-h.Schneider-2_ab:FBgn0004656_SRR9960717r1-SRR9960717r2,remap2022_GSE135771.fs-1-h.Schneider-2_ab:FBgn0004656_SRR9960718r1-SRR9960718r2	remap2022_GSE135771.Input.fs-1-h.Schneider-2_ab:FBgn0004656_SRR9960715r1-SRR9960715r2,remap2022_GSE135771.Input.fs-1-h.Schneider-2_ab:FBgn0004656_SRR9960716r1-SRR9960716r2
GSE136407.CTCF.embryo:FBgn0035769	GSE136407	CTCF	FBgn0035769	embryo:FBgn0035769	embryo	whole_embryo	NA	embryo.whole_embryo		remap2022_GSE136407.CTCF.embryo:FBgn0035769_SRR10045475
GSE136407.Zaf1.embryo:FBgn0037921	GSE136407	Zaf1	FBgn0037921	embryo:FBgn0037921	embryo	whole_embryo	NA	embryo.whole_embryo		remap2022_GSE136407.Zaf1.embryo:FBgn0037921_SRR10045472,remap2022_GSE136407.Zaf1.embryo:FBgn0037921_SRR10045473
GSE138553.ato.third-instar_eye-disc:FBgn0010433	GSE138553	ato	FBgn0010433	third-instar	third_instar_larva	eye-disc	NA	third_instar_larva.eye-disc	eye-disc	remap2022_GSE138553.ato.third-instar_eye-disc:FBgn0010433_SRR10244299,remap2022_GSE138553.ato.third-instar_eye-disc:FBgn0010433_SRR10244300,remap2022_GSE138553.ato.third-instar_eye-disc:FBgn0010433_SRR10244301,remap2022_GSE138553.ato.third-instar_eye-disc:FBgn0010433_SRR10244302,remap2022_GSE138553.ato.third-instar_eye-disc:FBgn0010433_SRR10244303,remap2022_GSE138553.ato.third-instar_eye-disc:FBg…	remap2022_GSE138553.Input.ato.third-instar_eye-disc:FBgn0010433_SRR10244307,remap2022_GSE138553.Input.ato.third-instar_eye-disc:FBgn0010433_SRR10244308,remap2022_GSE138553.Input.ato.third-instar_eye-disc:FBgn0010433_SRR10244309,remap2022_GSE138553.Input.ato.third-instar_eye-disc:FBgn0010433_SRR10244310,remap2022_GSE138553.Input.ato.third-instar_eye-disc:FBgn0010433_SRR10244311,remap2022_GSE138553…
GSE139316.Cp190.Schneider-2_0h_CP190:FBgn0000283	GSE139316	Cp190	FBgn0000283	Schneider-2	S2	S2	0h	S2.0h	0h,CP190	remap2022_GSE139316.Cp190.Schneider-2_0h_CP190:FBgn0000283_SRR10340360r1-SRR10340360r2	remap2022_GSE139316.Input.Cp190.Schneider-2_0h_CP190:FBgn0000283_SRR10340364r1-SRR10340364r2
GSE139316.Cp190.Schneider-2_1h_CP190:FBgn0000283	GSE139316	Cp190	FBgn0000283	Schneider-2	S2	S2	1h	S2.1h	1h,CP190	remap2022_GSE139316.Cp190.Schneider-2_1h_CP190:FBgn0000283_SRR10340361r1-SRR10340361r2	remap2022_GSE139316.Input.Cp190.Schneider-2_1h_CP190:FBgn0000283_SRR10340363r1-SRR10340363r2
GSE139316.Cp190.prepupa_white:FBgn0000283	GSE139316	Cp190	FBgn0000283	prepupa	prepupa	whole-fly	NA	prepupa.whole-fly	white	remap2022_GSE139316.Cp190.prepupa_white:FBgn0000283_SRR10340365r1-SRR10340365r2	remap2022_GSE139316.Input.Cp190.prepupa_white:FBgn0000283_SRR10340366r1-SRR10340366r2
GSE139316.EcR.Schneider-2:FBgn0000546	GSE139316	EcR	FBgn0000546	Schneider-2:FBgn0000546	S2	S2	NA	S2		remap2022_GSE139316.EcR.Schneider-2:FBgn0000546_SRR10340350r1-SRR10340350r2	remap2022_GSE139316.Input.EcR.Schneider-2:FBgn0000546_SRR10340363r1-SRR10340363r2
GSE139316.usp.Schneider-2:FBgn0003964	GSE139316	usp	FBgn0003964	Schneider-2:FBgn0003964	S2	S2	NA	S2		remap2022_GSE139316.usp.Schneider-2:FBgn0003964_SRR10340353r1-SRR10340353r2	remap2022_GSE139316.Input.usp.Schneider-2:FBgn0003964_SRR10340363r1-SRR10340363r2
GSE139316.usp.Schneider-2_APEX2:FBgn0003964	GSE139316	usp	FBgn0003964	Schneider-2	S2	S2	NA	S2	APEX2	remap2022_GSE139316.usp.Schneider-2_APEX2:FBgn0003964_SRR10340355r1-SRR10340355r2	remap2022_GSE139316.Input.usp.Schneider-2_APEX2:FBgn0003964_SRR10340363r1-SRR10340363r2
GSE139316.usp.Schneider-2_BioID2:FBgn0003964	GSE139316	usp	FBgn0003964	Schneider-2	S2	S2	NA	S2	BioID2	remap2022_GSE139316.usp.Schneider-2_BioID2:FBgn0003964_SRR10340354r1-SRR10340354r2	remap2022_GSE139316.Input.usp.Schneider-2_BioID2:FBgn0003964_SRR10340363r1-SRR10340363r2
GSE140722.opa.embryo_early_homemade:FBgn0003002	GSE140722	opa	FBgn0003002	embryo	embryo	whole_embryo	NA	embryo.whole_embryo	early,homemade	remap2022_GSE140722.opa.embryo_early_homemade:FBgn0003002_SRR10502454,remap2022_GSE140722.opa.embryo_early_homemade:FBgn0003002_SRR10502455	remap2022_GSE140722.Input.opa.embryo_early_homemade:FBgn0003002_SRR10502456,remap2022_GSE140722.Input.opa.embryo_early_homemade:FBgn0003002_SRR10502457
GSE140722.opa.embryo_late_homemade:FBgn0003002	GSE140722	opa	FBgn0003002	embryo	embryo	whole_embryo	NA	embryo.whole_embryo	late,homemade	remap2022_GSE140722.opa.embryo_late_homemade:FBgn0003002_SRR10502458,remap2022_GSE140722.opa.embryo_late_homemade:FBgn0003002_SRR10502459	remap2022_GSE140722.Input.opa.embryo_late_homemade:FBgn0003002_SRR10502460,remap2022_GSE140722.Input.opa.embryo_late_homemade:FBgn0003002_SRR10502461
GSE141538.opa.embryo_blastoderm:FBgn0003002	GSE141538	opa	FBgn0003002	embryo	embryo	blastoderm	NA	embryo.blastoderm	blastoderm	remap2022_GSE141538.opa.embryo_blastoderm:FBgn0003002_SRR10597308,remap2022_GSE141538.opa.embryo_blastoderm:FBgn0003002_SRR10597309,remap2022_GSE141538.opa.embryo_blastoderm:FBgn0003002_SRR10597310
GSE141538.w.embryo_blastoderm:FBgn0003996	GSE141538	w	FBgn0003996	embryo	embryo	blastoderm	NA	embryo.blastoderm	blastoderm	remap2022_GSE141538.w.embryo_blastoderm:FBgn0003996_SRR10597305,remap2022_GSE141538.w.embryo_blastoderm:FBgn0003996_SRR10597306,remap2022_GSE141538.w.embryo_blastoderm:FBgn0003996_SRR10597307
GSE141738.Eip93F.adult_wing:FBgn0264490	GSE141738	Eip93F	FBgn0264490	adult	adult	wing	NA	adult.wing	wing	remap2022_GSE141738.Eip93F.adult_wing:FBgn0264490_SRR10620137,remap2022_GSE141738.Eip93F.adult_wing:FBgn0264490_SRR10620138	remap2022_GSE141738.Input.Eip93F.adult_wing:FBgn0264490_SRR10620139
GSE141738.Eip93F.adult_wing_HA:FBgn0264490	GSE141738	Eip93F	FBgn0264490	adult	adult	wing	NA	adult.wing	wing,HA	remap2022_GSE141738.Eip93F.adult_wing_HA:FBgn0264490_SRR10620140,remap2022_GSE141738.Eip93F.adult_wing_HA:FBgn0264490_SRR10620141	remap2022_GSE141738.Input.Eip93F.adult_wing_HA:FBgn0264490_SRR10620139
GSE143747.Lpt.Schneider-2:FBgn0263667	GSE143747	Lpt	FBgn0263667	Schneider-2:FBgn0263667	S2	S2	NA	S2		remap2022_GSE143747.Lpt.Schneider-2:FBgn0263667_SRR10901255	remap2022_GSE143747.Input.Lpt.Schneider-2:FBgn0263667_SRR10901256
GSE143747.Lpt.third-instar:FBgn0263667	GSE143747	Lpt	FBgn0263667	third-instar:FBgn0263667	third_instar_larva	whole_larva	NA	third_instar_larva.whole_larva		remap2022_GSE143747.Lpt.third-instar:FBgn0263667_SRR10901257	remap2022_GSE143747.Input.Lpt.third-instar:FBgn0263667_SRR10901258
GSE144763.ERR.adult_whole-fly_male_6d:FBgn0035849	GSE144763	ERR	FBgn0035849	adult	adult	whole-fly	6d	adult.whole-fly.6d	whole-fly,male,6d	remap2022_GSE144763.ERR.adult_whole-fly_male_6d:FBgn0035849_SRR11017730,remap2022_GSE144763.ERR.adult_whole-fly_male_6d:FBgn0035849_SRR11017731,remap2022_GSE144763.ERR.adult_whole-fly_male_6d:FBgn0035849_SRR11017732,remap2022_GSE144763.ERR.adult_whole-fly_male_6d:FBgn0035849_SRR11017733
GSE145282.ph.adult_ovary_pclGLKD:FBgn0004861-FBgn0004860	GSE145282	ph	FBgn0004861-FBgn0004860	adult	adult	ovary	NA	adult.ovary	ovary,pclGLKD	remap2022_GSE145282.ph.adult_ovary_pclGLKD:FBgn0004861-FBgn0004860_SRR11084675	remap2022_GSE145282.Input.ph.adult_ovary_pclGLKD:FBgn0004861-FBgn0004860_SRR11084674
GSE145282.pho.adult_ovary:FBgn0002521	GSE145282	pho	FBgn0002521	adult	adult	ovary	NA	adult.ovary	ovary	remap2022_GSE145282.pho.adult_ovary:FBgn0002521_SRR11084668	remap2022_GSE145282.Input.pho.adult_ovary:FBgn0002521_SRR11084667
GSE150297.Clamp.embryo_DWT:FBgn0032979	GSE150297	Clamp	FBgn0032979	embryo	embryo	whole_embryo	NA	embryo.whole_embryo	DWT	remap2022_GSE150297.Clamp.embryo_DWT:FBgn0032979_SRR11772152r1-SRR11772152r2,remap2022_GSE150297.Clamp.embryo_DWT:FBgn0032979_SRR11772153r1-SRR11772153r2	remap2022_GSE150297.Input.Clamp.embryo_DWT:FBgn0032979_SRR11772148r1-SRR11772148r2,remap2022_GSE150297.Input.Clamp.embryo_DWT:FBgn0032979_SRR11772149r1-SRR11772149r2
GSE150297.Clamp.embryo_PR:FBgn0032979	GSE150297	Clamp	FBgn0032979	embryo	embryo	whole_embryo	NA	embryo.whole_embryo	PR	remap2022_GSE150297.Clamp.embryo_PR:FBgn0032979_SRR11772158r1-SRR11772158r2,remap2022_GSE150297.Clamp.embryo_PR:FBgn0032979_SRR11772159r1-SRR11772159r2	remap2022_GSE150297.Input.Clamp.embryo_PR:FBgn0032979_SRR11772154r1-SRR11772154r2,remap2022_GSE150297.Input.Clamp.embryo_PR:FBgn0032979_SRR11772155r1-SRR11772155r2
GSE150642.CoRest.mushroom-body_light_CS-2278:FBgn0261573	GSE150642	CoRest	FBgn0261573	mushroom-body	adult	mushroom_body	NA	adult.mushroom_body	light,CS-2278	remap2022_GSE150642.CoRest.mushroom-body_light_CS-2278:FBgn0261573_SRR11795471r1-SRR11795471r2,remap2022_GSE150642.CoRest.mushroom-body_light_CS-2278:FBgn0261573_SRR11795472r1-SRR11795472r2,remap2022_GSE150642.CoRest.mushroom-body_light_CS-2278:FBgn0261573_SRR11795473r1-SRR11795473r2
GSE150642.CoRest.mushroom-body_naive_CS-2278:FBgn0261573	GSE150642	CoRest	FBgn0261573	mushroom-body	adult	mushroom_body	NA	adult.mushroom_body	naive,CS-2278	remap2022_GSE150642.CoRest.mushroom-body_naive_CS-2278:FBgn0261573_SRR11795468r1-SRR11795468r2,remap2022_GSE150642.CoRest.mushroom-body_naive_CS-2278:FBgn0261573_SRR11795469r1-SRR11795469r2,remap2022_GSE150642.CoRest.mushroom-body_naive_CS-2278:FBgn0261573_SRR11795470r1-SRR11795470r2	remap2022_GSE150642.Input.CoRest.mushroom-body_naive_CS-2278:FBgn0261573_SRR11795474r1-SRR11795474r2
GSE150642.HDAC1.mushroom-body_light_homemade:FBgn0015805	GSE150642	HDAC1	FBgn0015805	mushroom-body	adult	mushroom_body	NA	adult.mushroom_body	light,homemade	remap2022_GSE150642.HDAC1.mushroom-body_light_homemade:FBgn0015805_SRR11795465r1-SRR11795465r2,remap2022_GSE150642.HDAC1.mushroom-body_light_homemade:FBgn0015805_SRR11795466r1-SRR11795466r2,remap2022_GSE150642.HDAC1.mushroom-body_light_homemade:FBgn0015805_SRR11795467r1-SRR11795467r2
GSE150642.HDAC1.mushroom-body_naive_homemade:FBgn0015805	GSE150642	HDAC1	FBgn0015805	mushroom-body	adult	mushroom_body	NA	adult.mushroom_body	naive,homemade	remap2022_GSE150642.HDAC1.mushroom-body_naive_homemade:FBgn0015805_SRR11795462r1-SRR11795462r2,remap2022_GSE150642.HDAC1.mushroom-body_naive_homemade:FBgn0015805_SRR11795463r1-SRR11795463r2,remap2022_GSE150642.HDAC1.mushroom-body_naive_homemade:FBgn0015805_SRR11795464r1-SRR11795464r2	remap2022_GSE150642.Input.HDAC1.mushroom-body_naive_homemade:FBgn0015805_SRR11795474r1-SRR11795474r2
GSE150642.nej.mushroom-body_light_homemade:FBgn0261617	GSE150642	nej	FBgn0261617	mushroom-body	adult	mushroom_body	NA	adult.mushroom_body	light,homemade	remap2022_GSE150642.nej.mushroom-body_light_homemade:FBgn0261617_SRR11795459r1-SRR11795459r2,remap2022_GSE150642.nej.mushroom-body_light_homemade:FBgn0261617_SRR11795460r1-SRR11795460r2,remap2022_GSE150642.nej.mushroom-body_light_homemade:FBgn0261617_SRR11795461r1-SRR11795461r2
GSE150642.nej.mushroom-body_naive_homemade:FBgn0261617	GSE150642	nej	FBgn0261617	mushroom-body	adult	mushroom_body	NA	adult.mushroom_body	naive,homemade	remap2022_GSE150642.nej.mushroom-body_naive_homemade:FBgn0261617_SRR11795456r1-SRR11795456r2,remap2022_GSE150642.nej.mushroom-body_naive_homemade:FBgn0261617_SRR11795457r1-SRR11795457r2,remap2022_GSE150642.nej.mushroom-body_naive_homemade:FBgn0261617_SRR11795458r1-SRR11795458r2	remap2022_GSE150642.Input.nej.mushroom-body_naive_homemade:FBgn0261617_SRR11795474r1-SRR11795474r2
GSE156892.Fer2.adult_14d_head:FBgn0038402	GSE156892	Fer2	FBgn0038402	adult	adult	head	14d	adult.head.14d	14d,head	remap2022_GSE156892.Fer2.adult_14d_head:FBgn0038402_SRR12518270,remap2022_GSE156892.Fer2.adult_14d_head:FBgn0038402_SRR12518271	remap2022_GSE156892.Input.Fer2.adult_14d_head:FBgn0038402_SRR12518272,remap2022_GSE156892.Input.Fer2.adult_14d_head:FBgn0038402_SRR12518273
GSE157235.Trl.Schneider-2_BAPRNAi:FBgn0013263	GSE157235	Trl	FBgn0013263	Schneider-2	S2	S2	NA	S2	BAPRNAi	remap2022_GSE157235.Trl.Schneider-2_BAPRNAi:FBgn0013263_SRR12558899r1-SRR12558899r2,remap2022_GSE157235.Trl.Schneider-2_BAPRNAi:FBgn0013263_SRR12558900r1-SRR12558900r2
GSE157235.Trl.Schneider-2_GAFRNAi:FBgn0013263	GSE157235	Trl	FBgn0013263	Schneider-2	S2	S2	NA	S2	GAFRNAi	remap2022_GSE157235.Trl.Schneider-2_GAFRNAi:FBgn0013263_SRR12558901r1-SRR12558901r2,remap2022_GSE157235.Trl.Schneider-2_GAFRNAi:FBgn0013263_SRR12558902r1-SRR12558902r2
GSE157235.Trl.Schneider-2_LACZRNAi:FBgn0013263	GSE157235	Trl	FBgn0013263	Schneider-2	S2	S2	NA	S2	LACZRNAi	remap2022_GSE157235.Trl.Schneider-2_LACZRNAi:FBgn0013263_SRR12558903r1-SRR12558903r2,remap2022_GSE157235.Trl.Schneider-2_LACZRNAi:FBgn0013263_SRR12558904r1-SRR12558904r2
GSE16013.nej.adult_female:FBgn0261617	GSE16013	nej	FBgn0261617	adult	adult	whole-fly	NA	adult.whole-fly	female	remap2022_GSE16013.nej.adult_female:FBgn0261617_SRR030313	remap2022_GSE16013.Input.nej.adult_female:FBgn0261617_SRR030314
GSE16013.nej.adult_male:FBgn0261617	GSE16013	nej	FBgn0261617	adult	adult	whole-fly	NA	adult.whole-fly	male	remap2022_GSE16013.nej.adult_male:FBgn0261617_SRR030315	remap2022_GSE16013.Input.nej.adult_male:FBgn0261617_SRR030316
GSE16013.nej.embryo_0h-4h:FBgn0261617	GSE16013	nej	FBgn0261617	embryo	embryo	whole_embryo	0-4h	embryo.whole_embryo.0-4h	0h-4h	remap2022_GSE16013.nej.embryo_0h-4h:FBgn0261617_SRR030375	remap2022_GSE16013.Input.nej.embryo_0h-4h:FBgn0261617_SRR030270
GSE16013.nej.embryo_12h-16h:FBgn0261617	GSE16013	nej	FBgn0261617	embryo	embryo	whole_embryo	12-16h	embryo.whole_embryo.12-16h	12h-16h	remap2022_GSE16013.nej.embryo_12h-16h:FBgn0261617_SRR030317	remap2022_GSE16013.Input.nej.embryo_12h-16h:FBgn0261617_SRR030318
GSE16013.nej.embryo_16h-20h:FBgn0261617	GSE16013	nej	FBgn0261617	embryo	embryo	whole_embryo	16-20h	embryo.whole_embryo.16-20h	16h-20h	remap2022_GSE16013.nej.embryo_16h-20h:FBgn0261617_SRR030333	remap2022_GSE16013.Input.nej.embryo_16h-20h:FBgn0261617_SRR030272
GSE16013.nej.embryo_20h-24h:FBgn0261617	GSE16013	nej	FBgn0261617	embryo	embryo	whole_embryo	20-24h	embryo.whole_embryo.20-24h	20h-24h	remap2022_GSE16013.nej.embryo_20h-24h:FBgn0261617_SRR030374	remap2022_GSE16013.Input.nej.embryo_20h-24h:FBgn0261617_SRR030286
GSE16013.nej.embryo_8h-12h:FBgn0261617	GSE16013	nej	FBgn0261617	embryo	embryo	whole_embryo	8-12h	embryo.whole_embryo.8-12h	8h-12h	remap2022_GSE16013.nej.embryo_8h-12h:FBgn0261617_SRR030381	remap2022_GSE16013.Input.nej.embryo_8h-12h:FBgn0261617_SRR030382
GSE16013.nej.pupa:FBgn0261617	GSE16013	nej	FBgn0261617	pupa:FBgn0261617	pupa	whole-fly	NA	pupa.whole-fly		remap2022_GSE16013.nej.pupa:FBgn0261617_SRR030325	remap2022_GSE16013.Input.nej.pupa:FBgn0261617_SRR030326
GSE16013.nej.third-instar:FBgn0261617	GSE16013	nej	FBgn0261617	third-instar:FBgn0261617	third_instar_larva	whole_larva	NA	third_instar_larva.whole_larva		remap2022_GSE16013.nej.third-instar:FBgn0261617_SRR030323	remap2022_GSE16013.Input.nej.third-instar:FBgn0261617_SRR030324
GSE17697.Psc.Kc:FBgn0005624	GSE17697	Psc	FBgn0005624	Kc:FBgn0005624	Kc	Kc	NA	Kc		remap2022_GSE17697.Psc.Kc:FBgn0005624_SRR038617,remap2022_GSE17697.Psc.Kc:FBgn0005624_SRR038618,remap2022_GSE17697.Psc.Kc:FBgn0005624_SRR038619
GSE17729.msl-3-tap.larva:FBgn0002775-FBgn0015550	GSE17729	msl-3-tap	FBgn0002775-FBgn0015550	larva:FBgn0002775-FBgn0015550	larva	whole_larva	NA	larva.whole_larva		remap2022_GSE17729.msl-3-tap.larva:FBgn0002775-FBgn0015550_SRR027999	remap2022_GSE17729.Input.msl-3-tap.larva:FBgn0002775-FBgn0015550_SRR028000
GSE19025.Hsf.S2-DRSC:FBgn0001222	GSE19025	Hsf	FBgn0001222	S2-DRSC:FBgn0001222	S2	S2	NA	S2		remap2022_GSE19025.Hsf.S2-DRSC:FBgn0001222_SRR039093,remap2022_GSE19025.Hsf.S2-DRSC:FBgn0001222_SRR039094,remap2022_GSE19025.Hsf.S2-DRSC:FBgn0001222_SRR039095	remap2022_GSE19025.Input.Hsf.S2-DRSC:FBgn0001222_SRR039090,remap2022_GSE19025.Input.Hsf.S2-DRSC:FBgn0001222_SRR039091,remap2022_GSE19025.Input.Hsf.S2-DRSC:FBgn0001222_SRR039092
GSE19025.Hsf.S2-DRSC_KD:FBgn0001222	GSE19025	Hsf	FBgn0001222	S2-DRSC	S2	S2	NA	S2	KD	remap2022_GSE19025.Hsf.S2-DRSC_KD:FBgn0001222_SRR039096,remap2022_GSE19025.Hsf.S2-DRSC_KD:FBgn0001222_SRR039097,remap2022_GSE19025.Hsf.S2-DRSC_KD:FBgn0001222_SRR039098	remap2022_GSE19025.Input.Hsf.S2-DRSC_KD:FBgn0001222_SRR039090,remap2022_GSE19025.Input.Hsf.S2-DRSC_KD:FBgn0001222_SRR039091,remap2022_GSE19025.Input.Hsf.S2-DRSC_KD:FBgn0001222_SRR039092
GSE19025.Hsf.S2-DRSC_NHS:FBgn0001222	GSE19025	Hsf	FBgn0001222	S2-DRSC	S2	S2	NA	S2	NHS	remap2022_GSE19025.Hsf.S2-DRSC_NHS:FBgn0001222_SRR039099,remap2022_GSE19025.Hsf.S2-DRSC_NHS:FBgn0001222_SRR039100,remap2022_GSE19025.Hsf.S2-DRSC_NHS:FBgn0001222_SRR039101,remap2022_GSE19025.Hsf.S2-DRSC_NHS:FBgn0001222_SRR039102	remap2022_GSE19025.Input.Hsf.S2-DRSC_NHS:FBgn0001222_SRR039090,remap2022_GSE19025.Input.Hsf.S2-DRSC_NHS:FBgn0001222_SRR039091,remap2022_GSE19025.Input.Hsf.S2-DRSC_NHS:FBgn0001222_SRR039092
GSE19025.Hsf.S2-DRSC_NHS_KD:FBgn0001222	GSE19025	Hsf	FBgn0001222	S2-DRSC	S2	S2	NA	S2	NHS,KD	remap2022_GSE19025.Hsf.S2-DRSC_NHS_KD:FBgn0001222_SRR039103,remap2022_GSE19025.Hsf.S2-DRSC_NHS_KD:FBgn0001222_SRR039104	remap2022_GSE19025.Input.Hsf.S2-DRSC_NHS_KD:FBgn0001222_SRR039090,remap2022_GSE19025.Input.Hsf.S2-DRSC_NHS_KD:FBgn0001222_SRR039091,remap2022_GSE19025.Input.Hsf.S2-DRSC_NHS_KD:FBgn0001222_SRR039092
GSE20000.CTCF.Schneider-2_200:FBgn0035769	GSE20000	CTCF	FBgn0035769	Schneider-2	S2	S2	NA	S2	200	remap2022_GSE20000.CTCF.Schneider-2_200:FBgn0035769_SRR034720,remap2022_GSE20000.CTCF.Schneider-2_200:FBgn0035769_SRR034721	remap2022_GSE20000.Input.CTCF.Schneider-2_200:FBgn0035769_SRR034722
GSE20000.CTCF.Schneider-2_500:FBgn0035769	GSE20000	CTCF	FBgn0035769	Schneider-2	S2	S2	NA	S2	500	remap2022_GSE20000.CTCF.Schneider-2_500:FBgn0035769_SRR034723,remap2022_GSE20000.CTCF.Schneider-2_500:FBgn0035769_SRR034724	remap2022_GSE20000.Input.CTCF.Schneider-2_500:FBgn0035769_SRR034725
GSE20000.EcR.prepupa_WPP30-33:FBgn0000546	GSE20000	EcR	FBgn0000546	prepupa	prepupa	whole-fly	NA	prepupa.whole-fly	WPP30-33	remap2022_GSE20000.EcR.prepupa_WPP30-33:FBgn0000546_SRR034726,remap2022_GSE20000.EcR.prepupa_WPP30-33:FBgn0000546_SRR034727,remap2022_GSE20000.EcR.prepupa_WPP30-33:FBgn0000546_SRR034728	remap2022_GSE20000.Input.EcR.prepupa_WPP30-33:FBgn0000546_SRR034729,remap2022_GSE20000.Input.EcR.prepupa_WPP30-33:FBgn0000546_SRR034730,remap2022_GSE20000.Input.EcR.prepupa_WPP30-33:FBgn0000546_SRR034731
GSE20000.EcR.prepupa_WPP:FBgn0000546	GSE20000	EcR	FBgn0000546	prepupa	prepupa	whole-fly	NA	prepupa.whole-fly	WPP	remap2022_GSE20000.EcR.prepupa_WPP:FBgn0000546_SRR034732,remap2022_GSE20000.EcR.prepupa_WPP:FBgn0000546_SRR034733,remap2022_GSE20000.EcR.prepupa_WPP:FBgn0000546_SRR034734	remap2022_GSE20000.Input.EcR.prepupa_WPP:FBgn0000546_SRR034735,remap2022_GSE20000.Input.EcR.prepupa_WPP:FBgn0000546_SRR034736,remap2022_GSE20000.Input.EcR.prepupa_WPP:FBgn0000546_SRR034737
GSE20000.HDAC4.embryo_0h-12h:FBgn0041210	GSE20000	HDAC4	FBgn0041210	embryo	embryo	whole_embryo	0-12h	embryo.whole_embryo.0-12h	0h-12h	remap2022_GSE20000.HDAC4.embryo_0h-12h:FBgn0041210_SRR034693,remap2022_GSE20000.HDAC4.embryo_0h-12h:FBgn0041210_SRR034694	remap2022_GSE20000.Input.HDAC4.embryo_0h-12h:FBgn0041210_SRR034695
GSE20000.HDAC4.embryo_0h-12h_493:FBgn0041210	GSE20000	HDAC4	FBgn0041210	embryo	embryo	whole_embryo	0-12h	embryo.whole_embryo.0-12h	0h-12h,493	remap2022_GSE20000.HDAC4.embryo_0h-12h_493:FBgn0041210_SRR034696,remap2022_GSE20000.HDAC4.embryo_0h-12h_493:FBgn0041210_SRR034697	remap2022_GSE20000.Input.HDAC4.embryo_0h-12h_493:FBgn0041210_SRR034695
GSE20000.HDAC4.embryo_0h-12h_494:FBgn0041210	GSE20000	HDAC4	FBgn0041210	embryo	embryo	whole_embryo	0-12h	embryo.whole_embryo.0-12h	0h-12h,494	remap2022_GSE20000.HDAC4.embryo_0h-12h_494:FBgn0041210_SRR034698,remap2022_GSE20000.HDAC4.embryo_0h-12h_494:FBgn0041210_SRR034699	remap2022_GSE20000.Input.HDAC4.embryo_0h-12h_494:FBgn0041210_SRR034695
GSE20000.HDAC4.embryo_0h-12h_495:FBgn0041210	GSE20000	HDAC4	FBgn0041210	embryo	embryo	whole_embryo	0-12h	embryo.whole_embryo.0-12h	0h-12h,495	remap2022_GSE20000.HDAC4.embryo_0h-12h_495:FBgn0041210_SRR034700,remap2022_GSE20000.HDAC4.embryo_0h-12h_495:FBgn0041210_SRR034701	remap2022_GSE20000.Input.HDAC4.embryo_0h-12h_495:FBgn0041210_SRR034695
GSE20000.HDAC4.embryo_0h-12h_496:FBgn0041210	GSE20000	HDAC4	FBgn0041210	embryo	embryo	whole_embryo	0-12h	embryo.whole_embryo.0-12h	0h-12h,496	remap2022_GSE20000.HDAC4.embryo_0h-12h_496:FBgn0041210_SRR034702,remap2022_GSE20000.HDAC4.embryo_0h-12h_496:FBgn0041210_SRR034703	remap2022_GSE20000.Input.HDAC4.embryo_0h-12h_496:FBgn0041210_SRR034695
GSE20000.HDAC4.embryo_0h-12h_497:FBgn0041210	GSE20000	HDAC4	FBgn0041210	embryo	embryo	whole_embryo	0-12h	embryo.whole_embryo.0-12h	0h-12h,497	remap2022_GSE20000.HDAC4.embryo_0h-12h_497:FBgn0041210_SRR034704,remap2022_GSE20000.HDAC4.embryo_0h-12h_497:FBgn0041210_SRR034705	remap2022_GSE20000.Input.HDAC4.embryo_0h-12h_497:FBgn0041210_SRR034695
GSE20000.HDAC4.embryo_0h-12h_498:FBgn0041210	GSE20000	HDAC4	FBgn0041210	embryo	embryo	whole_embryo	0-12h	embryo.whole_embryo.0-12h	0h-12h,498	remap2022_GSE20000.HDAC4.embryo_0h-12h_498:FBgn0041210_SRR034706,remap2022_GSE20000.HDAC4.embryo_0h-12h_498:FBgn0041210_SRR034707	remap2022_GSE20000.Input.HDAC4.embryo_0h-12h_498:FBgn0041210_SRR034695
GSE20000.HDAC4.embryo_0h-12h_499:FBgn0041210	GSE20000	HDAC4	FBgn0041210	embryo	embryo	whole_embryo	0-12h	embryo.whole_embryo.0-12h	0h-12h,499	remap2022_GSE20000.HDAC4.embryo_0h-12h_499:FBgn0041210_SRR034708,remap2022_GSE20000.HDAC4.embryo_0h-12h_499:FBgn0041210_SRR034709	remap2022_GSE20000.Input.HDAC4.embryo_0h-12h_499:FBgn0041210_SRR034695
GSE20000.HDAC4.embryo_0h-12h_500:FBgn0041210	GSE20000	HDAC4	FBgn0041210	embryo	embryo	whole_embryo	0-12h	embryo.whole_embryo.0-12h	0h-12h,500	remap2022_GSE20000.HDAC4.embryo_0h-12h_500:FBgn0041210_SRR034710,remap2022_GSE20000.HDAC4.embryo_0h-12h_500:FBgn0041210_SRR034711	remap2022_GSE20000.Input.HDAC4.embryo_0h-12h_500:FBgn0041210_SRR034695
GSE20000.HDAC4.embryo_0h-12h_501:FBgn0041210	GSE20000	HDAC4	FBgn0041210	embryo	embryo	whole_embryo	0-12h	embryo.whole_embryo.0-12h	0h-12h,501	remap2022_GSE20000.HDAC4.embryo_0h-12h_501:FBgn0041210_SRR034712,remap2022_GSE20000.HDAC4.embryo_0h-12h_501:FBgn0041210_SRR034713	remap2022_GSE20000.Input.HDAC4.embryo_0h-12h_501:FBgn0041210_SRR034695
GSE20000.cad.embryo:FBgn0000251	GSE20000	cad	FBgn0000251	embryo:FBgn0000251	embryo	whole_embryo	NA	embryo.whole_embryo		remap2022_GSE20000.cad.embryo:FBgn0000251_SRR034691	remap2022_GSE20000.Input.cad.embryo:FBgn0000251_SRR034692
GSE20000.cad.embryo_0h-4h:FBgn0000251	GSE20000	cad	FBgn0000251	embryo	embryo	whole_embryo	0-4h	embryo.whole_embryo.0-4h	0h-4h	remap2022_GSE20000.cad.embryo_0h-4h:FBgn0000251_SRR034714,remap2022_GSE20000.cad.embryo_0h-4h:FBgn0000251_SRR034715	remap2022_GSE20000.Input.cad.embryo_0h-4h:FBgn0000251_SRR034716,remap2022_GSE20000.Input.cad.embryo_0h-4h:FBgn0000251_SRR034717
GSE20000.cad.embryo_0h-8h:FBgn0000251	GSE20000	cad	FBgn0000251	embryo	embryo	whole_embryo	0-8h	embryo.whole_embryo.0-8h	0h-8h	remap2022_GSE20000.cad.embryo_0h-8h:FBgn0000251_SRR034718	remap2022_GSE20000.Input.cad.embryo_0h-8h:FBgn0000251_SRR034719
GSE20000.cad.third-instar:FBgn0000251	GSE20000	cad	FBgn0000251	third-instar:FBgn0000251	third_instar_larva	whole_larva	NA	third_instar_larva.whole_larva		remap2022_GSE20000.cad.third-instar:FBgn0000251_SRR034738,remap2022_GSE20000.cad.third-instar:FBgn0000251_SRR034739,remap2022_GSE20000.cad.third-instar:FBgn0000251_SRR034740	remap2022_GSE20000.Input.cad.third-instar:FBgn0000251_SRR034741,remap2022_GSE20000.Input.cad.third-instar:FBgn0000251_SRR034742,remap2022_GSE20000.Input.cad.third-instar:FBgn0000251_SRR034743
GSE20887.Orc2.S2-DRSC:FBgn0015270	GSE20887	Orc2	FBgn0015270	S2-DRSC:FBgn0015270	S2	S2	NA	S2		remap2022_GSE20887.Orc2.S2-DRSC:FBgn0015270_SRR037519,remap2022_GSE20887.Orc2.S2-DRSC:FBgn0015270_SRR037520	remap2022_GSE20887.Input.Orc2.S2-DRSC:FBgn0015270_SRR037521
GSE20888.Orc2.third-instar:FBgn0015270	GSE20888	Orc2	FBgn0015270	third-instar:FBgn0015270	third_instar_larva	whole_larva	NA	third_instar_larva.whole_larva		remap2022_GSE20888.Orc2.third-instar:FBgn0015270_SRR037522,remap2022_GSE20888.Orc2.third-instar:FBgn0015270_SRR037523	remap2022_GSE20888.Input.Orc2.third-instar:FBgn0015270_SRR037524
GSE20889.Orc2.Kc167:FBgn0015270	GSE20889	Orc2	FBgn0015270	Kc167:FBgn0015270	Kc	Kc	NA	Kc		remap2022_GSE20889.Orc2.Kc167:FBgn0015270_SRR037528,remap2022_GSE20889.Orc2.Kc167:FBgn0015270_SRR037529	remap2022_GSE20889.Input.Orc2.Kc167:FBgn0015270_SRR037530
GSE22623.AGO2.Schneider-2:FBgn0087035	GSE22623	AGO2	FBgn0087035	Schneider-2:FBgn0087035	S2	S2	NA	S2		remap2022_GSE22623.AGO2.Schneider-2:FBgn0087035_SRR059122	remap2022_GSE22623.Input.AGO2.Schneider-2:FBgn0087035_SRR059123
GSE22623.AGO2.Schneider-2_Mueller:FBgn0087035	GSE22623	AGO2	FBgn0087035	Schneider-2	S2	S2	NA	S2	Mueller	remap2022_GSE22623.AGO2.Schneider-2_Mueller:FBgn0087035_SRR167348	remap2022_GSE22623.Input.AGO2.Schneider-2_Mueller:FBgn0087035_SRR167349
GSE22623.AGO2.Schneider-3:FBgn0087035	GSE22623	AGO2	FBgn0087035	Schneider-3:FBgn0087035	Schneider-3	S3	NA	Schneider-3.S3		remap2022_GSE22623.AGO2.Schneider-3:FBgn0087035_SRR059124	remap2022_GSE22623.Input.AGO2.Schneider-3:FBgn0087035_SRR059125
GSE24449.CTCF.prepupa_white_homemade:FBgn0035769	GSE24449	CTCF	FBgn0035769	prepupa	prepupa	whole-fly	NA	prepupa.whole-fly	white,homemade	remap2022_GSE24449.CTCF.prepupa_white_homemade:FBgn0035769_SRR066831,remap2022_GSE24449.CTCF.prepupa_white_homemade:FBgn0035769_SRR066832,remap2022_GSE24449.CTCF.prepupa_white_homemade:FBgn0035769_SRR066833	remap2022_GSE24449.Input.CTCF.prepupa_white_homemade:FBgn0035769_SRR066834,remap2022_GSE24449.Input.CTCF.prepupa_white_homemade:FBgn0035769_SRR066835,remap2022_GSE24449.Input.CTCF.prepupa_white_homemade:FBgn0035769_SRR066836
GSE24521.Pc.S2-DRSC:FBgn0003042	GSE24521	Pc	FBgn0003042	S2-DRSC:FBgn0003042	S2	S2	NA	S2		remap2022_GSE24521.Pc.S2-DRSC:FBgn0003042_SRR067906,remap2022_GSE24521.Pc.S2-DRSC:FBgn0003042_SRR067907	remap2022_GSE24521.Input.Pc.S2-DRSC:FBgn0003042_SRR067914,remap2022_GSE24521.Input.Pc.S2-DRSC:FBgn0003042_SRR067915
GSE24521.Psc.S2-DRSC:FBgn0005624	GSE24521	Psc	FBgn0005624	S2-DRSC:FBgn0005624	S2	S2	NA	S2		remap2022_GSE24521.Psc.S2-DRSC:FBgn0005624_SRR067910,remap2022_GSE24521.Psc.S2-DRSC:FBgn0005624_SRR067911	remap2022_GSE24521.Input.Psc.S2-DRSC:FBgn0005624_SRR067914,remap2022_GSE24521.Input.Psc.S2-DRSC:FBgn0005624_SRR067915
GSE24521.ph.S2-DRSC:FBgn0004861-FBgn0004860	GSE24521	ph	FBgn0004861-FBgn0004860	S2-DRSC:FBgn0004861-FBgn0004860	S2	S2	NA	S2		remap2022_GSE24521.ph.S2-DRSC:FBgn0004861-FBgn0004860_SRR067908,remap2022_GSE24521.ph.S2-DRSC:FBgn0004861-FBgn0004860_SRR067909	remap2022_GSE24521.Input.ph.S2-DRSC:FBgn0004861-FBgn0004860_SRR067914,remap2022_GSE24521.Input.ph.S2-DRSC:FBgn0004861-FBgn0004860_SRR067915
GSE24521.trx.S2-DRSC:FBgn0003862	GSE24521	trx	FBgn0003862	S2-DRSC:FBgn0003862	S2	S2	NA	S2		remap2022_GSE24521.trx.S2-DRSC:FBgn0003862_SRR067912,remap2022_GSE24521.trx.S2-DRSC:FBgn0003862_SRR067913	remap2022_GSE24521.Input.trx.S2-DRSC:FBgn0003862_SRR067914,remap2022_GSE24521.Input.trx.S2-DRSC:FBgn0003862_SRR067915
GSE27679.su-Hw.Schneider-2_p1a-p1b:FBgn0003567	GSE27679	su-Hw	FBgn0003567	Schneider-2	S2	S2	NA	S2	p1a-p1b	remap2022_GSE27679.su-Hw.Schneider-2_p1a-p1b:FBgn0003567_SRR121540r1-SRR121540r2	remap2022_GSE27679.Input.su-Hw.Schneider-2_p1a-p1b:FBgn0003567_SRR121524r1-SRR121524r2
GSE27679.su-Hw.Schneider-2_s1-s7:FBgn0003567	GSE27679	su-Hw	FBgn0003567	Schneider-2	S2	S2	NA	S2	s1-s7	remap2022_GSE27679.su-Hw.Schneider-2_s1-s7:FBgn0003567_SRR121533,remap2022_GSE27679.su-Hw.Schneider-2_s1-s7:FBgn0003567_SRR121534,remap2022_GSE27679.su-Hw.Schneider-2_s1-s7:FBgn0003567_SRR121535,remap2022_GSE27679.su-Hw.Schneider-2_s1-s7:FBgn0003567_SRR121536,remap2022_GSE27679.su-Hw.Schneider-2_s1-s7:FBgn0003567_SRR121537,remap2022_GSE27679.su-Hw.Schneider-2_s1-s7:FBgn0003567_SRR121538,remap2022…	remap2022_GSE27679.Input.su-Hw.Schneider-2_s1-s7:FBgn0003567_SRR121517,remap2022_GSE27679.Input.su-Hw.Schneider-2_s1-s7:FBgn0003567_SRR121518,remap2022_GSE27679.Input.su-Hw.Schneider-2_s1-s7:FBgn0003567_SRR121519,remap2022_GSE27679.Input.su-Hw.Schneider-2_s1-s7:FBgn0003567_SRR121520,remap2022_GSE27679.Input.su-Hw.Schneider-2_s1-s7:FBgn0003567_SRR121521,remap2022_GSE27679.Input.su-Hw.Schneider-2_s…
GSE29513.Ada2b.embryo_stage-15-16_muscle:FBgn0037555	GSE29513	Ada2b	FBgn0037555	embryo	embryo	muscle	NA	embryo.muscle	stage-15-16,muscle	remap2022_GSE29513.Ada2b.embryo_stage-15-16_muscle:FBgn0037555_SRR222069,remap2022_GSE29513.Ada2b.embryo_stage-15-16_muscle:FBgn0037555_SRR222070,remap2022_GSE29513.Ada2b.embryo_stage-15-16_muscle:FBgn0037555_SRR222071	remap2022_GSE29513.Input.Ada2b.embryo_stage-15-16_muscle:FBgn0037555_SRR222079
GSE29513.Ada2b.embryo_stage-15-16_neuron:FBgn0037555	GSE29513	Ada2b	FBgn0037555	embryo	embryo	neuron	NA	embryo.neuron	stage-15-16,neuron	remap2022_GSE29513.Ada2b.embryo_stage-15-16_neuron:FBgn0037555_SRR222072,remap2022_GSE29513.Ada2b.embryo_stage-15-16_neuron:FBgn0037555_SRR222073,remap2022_GSE29513.Ada2b.embryo_stage-15-16_neuron:FBgn0037555_SRR222074	remap2022_GSE29513.Input.Ada2b.embryo_stage-15-16_neuron:FBgn0037555_SRR222080
GSE30740.BEAF-32.Kc167_0h:FBgn0015602	GSE30740	BEAF-32	FBgn0015602	Kc167	Kc	Kc	0h	Kc.0h	0h	remap2022_GSE30740.BEAF-32.Kc167_0h:FBgn0015602_SRR317185	remap2022_GSE30740.Input.BEAF-32.Kc167_0h:FBgn0015602_SRR317188,remap2022_GSE30740.Input.BEAF-32.Kc167_0h:FBgn0015602_SRR317189
GSE30740.BEAF-32.Kc167_3h:FBgn0015602	GSE30740	BEAF-32	FBgn0015602	Kc167	Kc	Kc	3h	Kc.3h	3h	remap2022_GSE30740.BEAF-32.Kc167_3h:FBgn0015602_SRR317186
GSE30740.BEAF-32.Kc167_48h:FBgn0015602	GSE30740	BEAF-32	FBgn0015602	Kc167	Kc	Kc	48h	Kc.48h	48h	remap2022_GSE30740.BEAF-32.Kc167_48h:FBgn0015602_SRR317187
GSE30740.CTCF.Kc167_0h:FBgn0035769	GSE30740	CTCF	FBgn0035769	Kc167	Kc	Kc	0h	Kc.0h	0h	remap2022_GSE30740.CTCF.Kc167_0h:FBgn0035769_SRR317182	remap2022_GSE30740.Input.CTCF.Kc167_0h:FBgn0035769_SRR317188,remap2022_GSE30740.Input.CTCF.Kc167_0h:FBgn0035769_SRR317189
GSE30740.CTCF.Kc167_3h:FBgn0035769	GSE30740	CTCF	FBgn0035769	Kc167	Kc	Kc	3h	Kc.3h	3h	remap2022_GSE30740.CTCF.Kc167_3h:FBgn0035769_SRR317183
GSE30740.CTCF.Kc167_48h:FBgn0035769	GSE30740	CTCF	FBgn0035769	Kc167	Kc	Kc	48h	Kc.48h	48h	remap2022_GSE30740.CTCF.Kc167_48h:FBgn0035769_SRR317184
GSE30740.su-Hw.Kc167_0h:FBgn0003567	GSE30740	su-Hw	FBgn0003567	Kc167	Kc	Kc	0h	Kc.0h	0h	remap2022_GSE30740.su-Hw.Kc167_0h:FBgn0003567_SRR317179	remap2022_GSE30740.Input.su-Hw.Kc167_0h:FBgn0003567_SRR317188,remap2022_GSE30740.Input.su-Hw.Kc167_0h:FBgn0003567_SRR317189
GSE30740.su-Hw.Kc167_3h:FBgn0003567	GSE30740	su-Hw	FBgn0003567	Kc167	Kc	Kc	3h	Kc.3h	3h	remap2022_GSE30740.su-Hw.Kc167_3h:FBgn0003567_SRR317180
GSE30740.su-Hw.Kc167_48h:FBgn0003567	GSE30740	su-Hw	FBgn0003567	Kc167	Kc	Kc	48h	Kc.48h	48h	remap2022_GSE30740.su-Hw.Kc167_48h:FBgn0003567_SRR317181
GSE30757.zld.embryo_cycle-13:FBgn0259789	GSE30757	zld	FBgn0259789	embryo	embryo	whole_embryo	NA	embryo.whole_embryo	cycle-13	remap2022_GSE30757.zld.embryo_cycle-13:FBgn0259789_SRR314830
GSE30757.zld.embryo_cycle-14:FBgn0259789	GSE30757	zld	FBgn0259789	embryo	embryo	whole_embryo	NA	embryo.whole_embryo	cycle-14	remap2022_GSE30757.zld.embryo_cycle-14:FBgn0259789_SRR314831
GSE30757.zld.embryo_cycle-8:FBgn0259789	GSE30757	zld	FBgn0259789	embryo	embryo	whole_embryo	NA	embryo.whole_embryo	cycle-8	remap2022_GSE30757.zld.embryo_cycle-8:FBgn0259789_SRR314829
GSE30820.ash1.S2-DRSC_C-term:FBgn0005386	GSE30820	ash1	FBgn0005386	S2-DRSC	S2	S2	NA	S2	C-term	remap2022_GSE30820.ash1.S2-DRSC_C-term:FBgn0005386_SRR315119
GSE30820.ash1.S2-DRSC_N-term:FBgn0005386	GSE30820	ash1	FBgn0005386	S2-DRSC	S2	S2	NA	S2	N-term	remap2022_GSE30820.ash1.S2-DRSC_N-term:FBgn0005386_SRR315120
GSE30820.fs-1-h.S2-DRSC_ID166:FBgn0004656	GSE30820	fs-1-h	FBgn0004656	S2-DRSC	S2	S2	NA	S2	ID166	remap2022_GSE30820.fs-1-h.S2-DRSC_ID166:FBgn0004656_SRR315121
GSE30820.fs-1-h.S2-DRSC_ID173:FBgn0004656	GSE30820	fs-1-h	FBgn0004656	S2-DRSC	S2	S2	NA	S2	ID173	remap2022_GSE30820.fs-1-h.S2-DRSC_ID173:FBgn0004656_SRR315122
GSE31226.Hsp83.S2-DRSC:FBgn0001233	GSE31226	Hsp83	FBgn0001233	S2-DRSC:FBgn0001233	S2	S2	NA	S2		remap2022_GSE31226.Hsp83.S2-DRSC:FBgn0001233_SRR327604,remap2022_GSE31226.Hsp83.S2-DRSC:FBgn0001233_SRR327605	remap2022_GSE31226.Input.Hsp83.S2-DRSC:FBgn0001233_SRR504969,remap2022_GSE31226.Input.Hsp83.S2-DRSC:FBgn0001233_SRR504970
GSE31899.Orc2.third-instar_salivary-gland:FBgn0015270	GSE31899	Orc2	FBgn0015270	third-instar	third_instar_larva	salivary-gland	NA	third_instar_larva.salivary-gland	salivary-gland	remap2022_GSE31899.Orc2.third-instar_salivary-gland:FBgn0015270_SRR345248
GSE31899.Orc2.third-instar_salivary-gland_SuUR:FBgn0015270	GSE31899	Orc2	FBgn0015270	third-instar	third_instar_larva	salivary-gland	NA	third_instar_larva.salivary-gland	salivary-gland,SuUR	remap2022_GSE31899.Orc2.third-instar_salivary-gland_SuUR:FBgn0015270_SRR345249
GSE32120.Ice1.Schneider-2:FBgn0034853	GSE32120	Ice1	FBgn0034853	Schneider-2:FBgn0034853	S2	S2	NA	S2		remap2022_GSE32120.Ice1.Schneider-2:FBgn0034853_SRR345567	remap2022_GSE32120.Input.Ice1.Schneider-2:FBgn0034853_SRR345570
GSE32120.Su-Tpl.Schneider-2:FBgn0014037	GSE32120	Su-Tpl	FBgn0014037	Schneider-2:FBgn0014037	S2	S2	NA	S2		remap2022_GSE32120.Su-Tpl.Schneider-2:FBgn0014037_SRR345566	remap2022_GSE32120.Input.Su-Tpl.Schneider-2:FBgn0014037_SRR345570
GSE32120.Su-Tpl.Schneider-2_309:FBgn0014037	GSE32120	Su-Tpl	FBgn0014037	Schneider-2	S2	S2	NA	S2	309	remap2022_GSE32120.Su-Tpl.Schneider-2_309:FBgn0014037_SRR345571	remap2022_GSE32120.Input.Su-Tpl.Schneider-2_309:FBgn0014037_SRR345572
GSE32120.lilli.Schneider-2:FBgn0041111	GSE32120	lilli	FBgn0041111	Schneider-2:FBgn0041111	S2	S2	NA	S2		remap2022_GSE32120.lilli.Schneider-2:FBgn0041111_SRR345568	remap2022_GSE32120.Input.lilli.Schneider-2:FBgn0041111_SRR345570
GSE32584.BEAF-32.Kc_interphase:FBgn0015602	GSE32584	BEAF-32	FBgn0015602	Kc	Kc	Kc	NA	Kc	interphase	remap2022_GSE32584.BEAF-32.Kc_interphase:FBgn0015602_SRR351346
GSE32584.BEAF-32.Kc_mitosis:FBgn0015602	GSE32584	BEAF-32	FBgn0015602	Kc	Kc	Kc	NA	Kc	mitosis	remap2022_GSE32584.BEAF-32.Kc_mitosis:FBgn0015602_SRR351347
GSE32584.CTCF.Kc_interphase:FBgn0035769	GSE32584	CTCF	FBgn0035769	Kc	Kc	Kc	NA	Kc	interphase	remap2022_GSE32584.CTCF.Kc_interphase:FBgn0035769_SRR351344
GSE32584.CTCF.Kc_mitosis:FBgn0035769	GSE32584	CTCF	FBgn0035769	Kc	Kc	Kc	NA	Kc	mitosis	remap2022_GSE32584.CTCF.Kc_mitosis:FBgn0035769_SRR351345
GSE32584.Cp190.Kc_interphase:FBgn0000283	GSE32584	Cp190	FBgn0000283	Kc	Kc	Kc	NA	Kc	interphase	remap2022_GSE32584.Cp190.Kc_interphase:FBgn0000283_SRR351342
GSE32584.Cp190.Kc_mitosis:FBgn0000283	GSE32584	Cp190	FBgn0000283	Kc	Kc	Kc	NA	Kc	mitosis	remap2022_GSE32584.Cp190.Kc_mitosis:FBgn0000283_SRR351343
GSE32584.su-Hw.Kc_mitosis:FBgn0003567	GSE32584	su-Hw	FBgn0003567	Kc	Kc	Kc	NA	Kc	mitosis	remap2022_GSE32584.su-Hw.Kc_mitosis:FBgn0003567_SRR351348
GSE33052.su-Hw.adult_ovary:FBgn0003567	GSE33052	su-Hw	FBgn0003567	adult	adult	ovary	NA	adult.ovary	ovary	remap2022_GSE33052.su-Hw.adult_ovary:FBgn0003567_SRR353679	remap2022_GSE33052.Input.su-Hw.adult_ovary:FBgn0003567_SRR353681
GSE33052.su-Hw.adult_ovary_fv-strain:FBgn0003567	GSE33052	su-Hw	FBgn0003567	adult	adult	ovary	NA	adult.ovary	ovary,fv-strain	remap2022_GSE33052.su-Hw.adult_ovary_fv-strain:FBgn0003567_SRR353682	remap2022_GSE33052.Input.su-Hw.adult_ovary_fv-strain:FBgn0003567_SRR353684
GSE33052.su-Hw.adult_ovary_preimmune:FBgn0003567	GSE33052	su-Hw	FBgn0003567	adult	adult	ovary,preimmune	NA	adult.ovary,preimmune	ovary,preimmune	remap2022_GSE33052.su-Hw.adult_ovary_preimmune:FBgn0003567_SRR353680	remap2022_GSE33052.Input.su-Hw.adult_ovary_preimmune:FBgn0003567_SRR353681
GSE33052.su-Hw.adult_ovary_preimmune_fv-strain:FBgn0003567	GSE33052	su-Hw	FBgn0003567	adult	adult	ovary,preimmune	NA	adult.ovary,preimmune	ovary,preimmune,fv-strain	remap2022_GSE33052.su-Hw.adult_ovary_preimmune_fv-strain:FBgn0003567_SRR353683	remap2022_GSE33052.Input.su-Hw.adult_ovary_preimmune_fv-strain:FBgn0003567_SRR353684
GSE33546.Jarid2.third-instar:FBgn0036004	GSE33546	Jarid2	FBgn0036004	third-instar:FBgn0036004	third_instar_larva	whole_larva	NA	third_instar_larva.whole_larva		remap2022_GSE33546.Jarid2.third-instar:FBgn0036004_SRR363405,remap2022_GSE33546.Jarid2.third-instar:FBgn0036004_SRR363406	remap2022_GSE33546.Input.Jarid2.third-instar:FBgn0036004_SRR363409,remap2022_GSE33546.Input.Jarid2.third-instar:FBgn0036004_SRR363410
GSE33546.Jarid2.third-instar_e0:FBgn0036004	GSE33546	Jarid2	FBgn0036004	third-instar	third_instar_larva	whole_larva	NA	third_instar_larva.whole_larva	e0	remap2022_GSE33546.Jarid2.third-instar_e0:FBgn0036004_SRR363416	remap2022_GSE33546.Input.Jarid2.third-instar_e0:FBgn0036004_SRR363420
GSE33546.Jarid2.third-instar_mb:FBgn0036004	GSE33546	Jarid2	FBgn0036004	third-instar	third_instar_larva	whole_larva	NA	third_instar_larva.whole_larva	mb	remap2022_GSE33546.Jarid2.third-instar_mb:FBgn0036004_SRR363415	remap2022_GSE33546.Input.Jarid2.third-instar_mb:FBgn0036004_SRR363419
GSE33546.Su-z-12.larva_eye-antenna-imaginal-disc:FBgn0020887	GSE33546	Su-z-12	FBgn0020887	larva	larva	eye-antenna-imaginal-disc	NA	larva.eye-antenna-imaginal-disc	eye-antenna-imaginal-disc	remap2022_GSE33546.Su-z-12.larva_eye-antenna-imaginal-disc:FBgn0020887_SRR363425	remap2022_GSE33546.Input.Su-z-12.larva_eye-antenna-imaginal-disc:FBgn0020887_SRR363426
GSE33546.Su-z-12.larva_eye-antenna-imaginal-disc_mb:FBgn0020887	GSE33546	Su-z-12	FBgn0020887	larva	larva	eye-antenna-imaginal-disc	NA	larva.eye-antenna-imaginal-disc	eye-antenna-imaginal-disc,mb	remap2022_GSE33546.Su-z-12.larva_eye-antenna-imaginal-disc_mb:FBgn0020887_SRR363427	remap2022_GSE33546.Input.Su-z-12.larva_eye-antenna-imaginal-disc_mb:FBgn0020887_SRR363428
GSE33546.Su-z-12.third-instar:FBgn0020887	GSE33546	Su-z-12	FBgn0020887	third-instar:FBgn0020887	third_instar_larva	whole_larva	NA	third_instar_larva.whole_larva		remap2022_GSE33546.Su-z-12.third-instar:FBgn0020887_SRR363407,remap2022_GSE33546.Su-z-12.third-instar:FBgn0020887_SRR363408	remap2022_GSE33546.Input.Su-z-12.third-instar:FBgn0020887_SRR363409,remap2022_GSE33546.Input.Su-z-12.third-instar:FBgn0020887_SRR363410
GSE33546.Su-z-12.third-instar_e0:FBgn0020887	GSE33546	Su-z-12	FBgn0020887	third-instar	third_instar_larva	whole_larva	NA	third_instar_larva.whole_larva	e0	remap2022_GSE33546.Su-z-12.third-instar_e0:FBgn0020887_SRR363418	remap2022_GSE33546.Input.Su-z-12.third-instar_e0:FBgn0020887_SRR363420
GSE33546.Su-z-12.third-instar_mb:FBgn0020887	GSE33546	Su-z-12	FBgn0020887	third-instar	third_instar_larva	whole_larva	NA	third_instar_larva.whole_larva	mb	remap2022_GSE33546.Su-z-12.third-instar_mb:FBgn0020887_SRR363417	remap2022_GSE33546.Input.Su-z-12.third-instar_mb:FBgn0020887_SRR363419
GSE34040.aop.embryo_stage-11:FBgn0000097	GSE34040	aop	FBgn0000097	embryo	embryo	whole_embryo	NA	embryo.whole_embryo	stage-11	remap2022_GSE34040.aop.embryo_stage-11:FBgn0000097_SRR385747,remap2022_GSE34040.aop.embryo_stage-11:FBgn0000097_SRR385748	remap2022_GSE34040.Input.aop.embryo_stage-11:FBgn0000097_SRR385749
GSE35648.BEAF-32.embryo_0h-8h:FBgn0015602	GSE35648	BEAF-32	FBgn0015602	embryo	embryo	whole_embryo	0-8h	embryo.whole_embryo.0-8h	0h-8h	remap2022_GSE35648.BEAF-32.embryo_0h-8h:FBgn0015602_SRR407386	remap2022_GSE35648.Input.BEAF-32.embryo_0h-8h:FBgn0015602_SRR407387
GSE36374.JIL-1.Kc167:FBgn0020412	GSE36374	JIL-1	FBgn0020412	Kc167:FBgn0020412	Kc	Kc	NA	Kc		remap2022_GSE36374.JIL-1.Kc167:FBgn0020412_SRR442092r1-SRR442092r2
GSE36393.l-3-mbt.Kc167:FBgn0002441	GSE36393	l-3-mbt	FBgn0002441	Kc167:FBgn0002441	Kc	Kc	NA	Kc		remap2022_GSE36393.l-3-mbt.Kc167:FBgn0002441_SRR442322r1-SRR442322r2
GSE36393.mod-mdg4.Kc167:FBgn0002781	GSE36393	mod-mdg4	FBgn0002781	Kc167:FBgn0002781	Kc	Kc	NA	Kc		remap2022_GSE36393.mod-mdg4.Kc167:FBgn0002781_SRR442320r1-SRR442320r2
GSE36404.ash1.S2-DRSC_C:FBgn0005386	GSE36404	ash1	FBgn0005386	S2-DRSC	S2	S2	NA	S2	C	remap2022_GSE36404.ash1.S2-DRSC_C:FBgn0005386_SRR442240
GSE36404.ash1.S2-DRSC_N:FBgn0005386	GSE36404	ash1	FBgn0005386	S2-DRSC	S2	S2	NA	S2	N	remap2022_GSE36404.ash1.S2-DRSC_N:FBgn0005386_SRR442239
GSE36404.fs-1-h.S2-DRSC_S:FBgn0004656	GSE36404	fs-1-h	FBgn0004656	S2-DRSC	S2	S2	NA	S2	S	remap2022_GSE36404.fs-1-h.S2-DRSC_S:FBgn0004656_SRR442241
GSE36404.fs-1-h.S2-DRSC_SL:FBgn0004656	GSE36404	fs-1-h	FBgn0004656	S2-DRSC	S2	S2	NA	S2	SL	remap2022_GSE36404.fs-1-h.S2-DRSC_SL:FBgn0004656_SRR442242
GSE36735.BEAF-32.third-instar_wing-imaginal-disc:FBgn0015602	GSE36735	BEAF-32	FBgn0015602	third-instar	third_instar_larva	wing-imaginal-disc	NA	third_instar_larva.wing-imaginal-disc	wing-imaginal-disc	remap2022_GSE36735.BEAF-32.third-instar_wing-imaginal-disc:FBgn0015602_SRR447742,remap2022_GSE36735.BEAF-32.third-instar_wing-imaginal-disc:FBgn0015602_SRR447743,remap2022_GSE36735.BEAF-32.third-instar_wing-imaginal-disc:FBgn0015602_SRR447744,remap2022_GSE36735.BEAF-32.third-instar_wing-imaginal-disc:FBgn0015602_SRR447745	remap2022_GSE36735.Input.BEAF-32.third-instar_wing-imaginal-disc:FBgn0015602_SRR447746,remap2022_GSE36735.Input.BEAF-32.third-instar_wing-imaginal-disc:FBgn0015602_SRR447747
GSE37864.mof.Schneider-2:FBgn0014340	GSE37864	mof	FBgn0014340	Schneider-2:FBgn0014340	S2	S2	NA	S2		remap2022_GSE37864.mof.Schneider-2:FBgn0014340_SRR495372,remap2022_GSE37864.mof.Schneider-2:FBgn0014340_SRR495373r1-SRR495373r2	remap2022_GSE37864.Input.mof.Schneider-2:FBgn0014340_SRR495378,remap2022_GSE37864.Input.mof.Schneider-2:FBgn0014340_SRR495379,remap2022_GSE37864.Input.mof.Schneider-2:FBgn0014340_SRR495380r1-SRR495380r2
GSE38166.Psc.Schneider-2:FBgn0005624	GSE38166	Psc	FBgn0005624	Schneider-2:FBgn0005624	S2	S2	NA	S2		remap2022_GSE38166.Psc.Schneider-2:FBgn0005624_SRR500151,remap2022_GSE38166.Psc.Schneider-2:FBgn0005624_SRR500152	remap2022_GSE38166.Input.Psc.Schneider-2:FBgn0005624_SRR500155,remap2022_GSE38166.Input.Psc.Schneider-2:FBgn0005624_SRR500156
GSE38166.ph.Schneider-2:FBgn0004861-FBgn0004860	GSE38166	ph	FBgn0004861-FBgn0004860	Schneider-2:FBgn0004861-FBgn0004860	S2	S2	NA	S2		remap2022_GSE38166.ph.Schneider-2:FBgn0004861-FBgn0004860_SRR500158	remap2022_GSE38166.Input.ph.Schneider-2:FBgn0004861-FBgn0004860_SRR500160
GSE38166.ph.Schneider-2_mitotic:FBgn0004861-FBgn0004860	GSE38166	ph	FBgn0004861-FBgn0004860	Schneider-2	S2	S2	NA	S2	mitotic	remap2022_GSE38166.ph.Schneider-2_mitotic:FBgn0004861-FBgn0004860_SRR500157	remap2022_GSE38166.Input.ph.Schneider-2_mitotic:FBgn0004861-FBgn0004860_SRR500159
GSE38402.lmd.embryo_stage-11-12_primary-mesodermal:FBgn0039039	GSE38402	lmd	FBgn0039039	embryo	embryo	primary-mesodermal	NA	embryo.primary-mesodermal	stage-11-12,primary-mesodermal	remap2022_GSE38402.lmd.embryo_stage-11-12_primary-mesodermal:FBgn0039039_SRR503390r1-SRR503390r2,remap2022_GSE38402.lmd.embryo_stage-11-12_primary-mesodermal:FBgn0039039_SRR503391r1-SRR503391r2	remap2022_GSE38402.Input.lmd.embryo_stage-11-12_primary-mesodermal:FBgn0039039_SRR503392r1-SRR503392r2
GSE38594.Trl.embryo_8h-16h:FBgn0013263	GSE38594	Trl	FBgn0013263	embryo	embryo	whole_embryo	8-16h	embryo.whole_embryo.8-16h	8h-16h	remap2022_GSE38594.Trl.embryo_8h-16h:FBgn0013263_SRR504946,remap2022_GSE38594.Trl.embryo_8h-16h:FBgn0013263_SRR504947,remap2022_GSE38594.Trl.embryo_8h-16h:FBgn0013263_SRR504948	remap2022_GSE38594.Input.Trl.embryo_8h-16h:FBgn0013263_SRR504954
GSE38594.Trl.third-instar_wing-imaginal-disc:FBgn0013263	GSE38594	Trl	FBgn0013263	third-instar	third_instar_larva	wing-imaginal-disc	NA	third_instar_larva.wing-imaginal-disc	wing-imaginal-disc	remap2022_GSE38594.Trl.third-instar_wing-imaginal-disc:FBgn0013263_SRR504955,remap2022_GSE38594.Trl.third-instar_wing-imaginal-disc:FBgn0013263_SRR504956	remap2022_GSE38594.Input.Trl.third-instar_wing-imaginal-disc:FBgn0013263_SRR504958,remap2022_GSE38594.Input.Trl.third-instar_wing-imaginal-disc:FBgn0013263_SRR504959
GSE38594.yki.embryo_8h-16h:FBgn0034970	GSE38594	yki	FBgn0034970	embryo	embryo	whole_embryo	8-16h	embryo.whole_embryo.8-16h	8h-16h	remap2022_GSE38594.yki.embryo_8h-16h:FBgn0034970_SRR504949,remap2022_GSE38594.yki.embryo_8h-16h:FBgn0034970_SRR504950,remap2022_GSE38594.yki.embryo_8h-16h:FBgn0034970_SRR504951	remap2022_GSE38594.Input.yki.embryo_8h-16h:FBgn0034970_SRR504954
GSE38594.yki.third-instar_wing-imaginal-disc:FBgn0034970	GSE38594	yki	FBgn0034970	third-instar	third_instar_larva	wing-imaginal-disc	NA	third_instar_larva.wing-imaginal-disc	wing-imaginal-disc	remap2022_GSE38594.yki.third-instar_wing-imaginal-disc:FBgn0034970_SRR504957	remap2022_GSE38594.Input.yki.third-instar_wing-imaginal-disc:FBgn0034970_SRR504958,remap2022_GSE38594.Input.yki.third-instar_wing-imaginal-disc:FBgn0034970_SRR504959
GSE39271.Clamp.Kc:FBgn0032979	GSE39271	Clamp	FBgn0032979	Kc:FBgn0032979	Kc	Kc	NA	Kc		remap2022_GSE39271.Clamp.Kc:FBgn0032979_SRR520445,remap2022_GSE39271.Clamp.Kc:FBgn0032979_SRR520447	remap2022_GSE39271.Input.Clamp.Kc:FBgn0032979_SRR520444,remap2022_GSE39271.Input.Clamp.Kc:FBgn0032979_SRR520446
GSE39271.Clamp.Schneider-2:FBgn0032979	GSE39271	Clamp	FBgn0032979	Schneider-2:FBgn0032979	S2	S2	NA	S2		remap2022_GSE39271.Clamp.Schneider-2:FBgn0032979_SRR520453,remap2022_GSE39271.Clamp.Schneider-2:FBgn0032979_SRR520455	remap2022_GSE39271.Input.Clamp.Schneider-2:FBgn0032979_SRR520452,remap2022_GSE39271.Input.Clamp.Schneider-2:FBgn0032979_SRR520454
GSE39271.Clamp.Schneider-2_msl-2-RNAi:FBgn0032979	GSE39271	Clamp	FBgn0032979	Schneider-2	S2	S2	NA	S2	msl-2-RNAi	remap2022_GSE39271.Clamp.Schneider-2_msl-2-RNAi:FBgn0032979_SRR520449,remap2022_GSE39271.Clamp.Schneider-2_msl-2-RNAi:FBgn0032979_SRR520451	remap2022_GSE39271.Input.Clamp.Schneider-2_msl-2-RNAi:FBgn0032979_SRR520448,remap2022_GSE39271.Input.Clamp.Schneider-2_msl-2-RNAi:FBgn0032979_SRR520450
GSE39393.Dp1.S2R-plus:FBgn0027835	GSE39393	Dp1	FBgn0027835	S2R-plus:FBgn0027835	S2	S2	NA	S2		remap2022_GSE39393.Dp1.S2R-plus:FBgn0027835_SRR522006,remap2022_GSE39393.Dp1.S2R-plus:FBgn0027835_SRR522007	remap2022_GSE39393.Input.Dp1.S2R-plus:FBgn0027835_SRR522008
GSE39521.Myc.Kc_interphase_sc-28208:FBgn0262656	GSE39521	Myc	FBgn0262656	Kc	Kc	Kc	NA	Kc	interphase,sc-28208	remap2022_GSE39521.Myc.Kc_interphase_sc-28208:FBgn0262656_SRR525171,remap2022_GSE39521.Myc.Kc_interphase_sc-28208:FBgn0262656_SRR525172
GSE39521.Myc.Kc_mitosis_sc-28208:FBgn0262656	GSE39521	Myc	FBgn0262656	Kc	Kc	Kc	NA	Kc	mitosis,sc-28208	remap2022_GSE39521.Myc.Kc_mitosis_sc-28208:FBgn0262656_SRR525173,remap2022_GSE39521.Myc.Kc_mitosis_sc-28208:FBgn0262656_SRR525174
GSE39664.Dref.Kc167:FBgn0015664	GSE39664	Dref	FBgn0015664	Kc167:FBgn0015664	Kc	Kc	NA	Kc		remap2022_GSE39664.Dref.Kc167:FBgn0015664_SRR527322,remap2022_GSE39664.Dref.Kc167:FBgn0015664_SRR527323
GSE39664.Dref.Kc167_mitosis:FBgn0015664	GSE39664	Dref	FBgn0015664	Kc167	Kc	Kc	NA	Kc	mitosis	remap2022_GSE39664.Dref.Kc167_mitosis:FBgn0015664_SRR527324,remap2022_GSE39664.Dref.Kc167_mitosis:FBgn0015664_SRR527325
GSE40467.Clk.adult_5-10d_body:FBgn0023076	GSE40467	Clk	FBgn0023076	adult	adult	body	5-10d	adult.body.5-10d	5-10d,body	remap2022_GSE40467.Clk.adult_5-10d_body:FBgn0023076_SRR548168,remap2022_GSE40467.Clk.adult_5-10d_body:FBgn0023076_SRR548170	remap2022_GSE40467.Input.Clk.adult_5-10d_body:FBgn0023076_SRR548169,remap2022_GSE40467.Input.Clk.adult_5-10d_body:FBgn0023076_SRR548171
GSE40467.Clk.adult_5-10d_head:FBgn0023076	GSE40467	Clk	FBgn0023076	adult	adult	head	5-10d	adult.head.5-10d	5-10d,head	remap2022_GSE40467.Clk.adult_5-10d_head:FBgn0023076_SRR548156,remap2022_GSE40467.Clk.adult_5-10d_head:FBgn0023076_SRR548158	remap2022_GSE40467.Input.Clk.adult_5-10d_head:FBgn0023076_SRR548157,remap2022_GSE40467.Input.Clk.adult_5-10d_head:FBgn0023076_SRR548159
GSE40467.cyc.adult_5-10d_body:FBgn0023094	GSE40467	cyc	FBgn0023094	adult	adult	body	5-10d	adult.body.5-10d	5-10d,body	remap2022_GSE40467.cyc.adult_5-10d_body:FBgn0023094_SRR548172,remap2022_GSE40467.cyc.adult_5-10d_body:FBgn0023094_SRR548174	remap2022_GSE40467.Input.cyc.adult_5-10d_body:FBgn0023094_SRR548173,remap2022_GSE40467.Input.cyc.adult_5-10d_body:FBgn0023094_SRR548175
GSE40467.cyc.adult_5-10d_head:FBgn0023094	GSE40467	cyc	FBgn0023094	adult	adult	head	5-10d	adult.head.5-10d	5-10d,head	remap2022_GSE40467.cyc.adult_5-10d_head:FBgn0023094_SRR548160,remap2022_GSE40467.cyc.adult_5-10d_head:FBgn0023094_SRR548162	remap2022_GSE40467.Input.cyc.adult_5-10d_head:FBgn0023094_SRR548161,remap2022_GSE40467.Input.cyc.adult_5-10d_head:FBgn0023094_SRR548163
GSE40467.w.adult_5-10d_head:FBgn0003996	GSE40467	w	FBgn0003996	adult	adult	head	5-10d	adult.head.5-10d	5-10d,head	remap2022_GSE40467.w.adult_5-10d_head:FBgn0003996_SRR548164,remap2022_GSE40467.w.adult_5-10d_head:FBgn0003996_SRR548166	remap2022_GSE40467.Input.w.adult_5-10d_head:FBgn0003996_SRR548165,remap2022_GSE40467.Input.w.adult_5-10d_head:FBgn0003996_SRR548167
GSE40646.Trl.S2-DRSC:FBgn0013263	GSE40646	Trl	FBgn0013263	S2-DRSC:FBgn0013263	S2	S2	NA	S2		remap2022_GSE40646.Trl.S2-DRSC:FBgn0013263_SRR567536,remap2022_GSE40646.Trl.S2-DRSC:FBgn0013263_SRR567537
GSE40646.Trl.S2-DRSC_KD:FBgn0013263	GSE40646	Trl	FBgn0013263	S2-DRSC	S2	S2	NA	S2	KD	remap2022_GSE40646.Trl.S2-DRSC_KD:FBgn0013263_SRR567538,remap2022_GSE40646.Trl.S2-DRSC_KD:FBgn0013263_SRR567539
GSE40797.mod-mdg4.ML-DmBG3-c2:FBgn0002781	GSE40797	mod-mdg4	FBgn0002781	ML-DmBG3-c2:FBgn0002781	ML-DmBG3-c2	ML-DmBG3-c2	NA	ML-DmBG3-c2		remap2022_GSE40797.mod-mdg4.ML-DmBG3-c2:FBgn0002781_SRR567590	remap2022_GSE40797.Input.mod-mdg4.ML-DmBG3-c2:FBgn0002781_SRR567585
GSE40797.mod-mdg4.ML-DmBG3-c2_alternate-ab:FBgn0002781	GSE40797	mod-mdg4	FBgn0002781	ML-DmBG3-c2	ML-DmBG3-c2	ML-DmBG3-c2	NA	ML-DmBG3-c2	alternate-ab	remap2022_GSE40797.mod-mdg4.ML-DmBG3-c2_alternate-ab:FBgn0002781_SRR567589	remap2022_GSE40797.Input.mod-mdg4.ML-DmBG3-c2_alternate-ab:FBgn0002781_SRR567585
GSE40797.shep.ML-DmBG3-c2:FBgn0052423	GSE40797	shep	FBgn0052423	ML-DmBG3-c2:FBgn0052423	ML-DmBG3-c2	ML-DmBG3-c2	NA	ML-DmBG3-c2		remap2022_GSE40797.shep.ML-DmBG3-c2:FBgn0052423_SRR567587	remap2022_GSE40797.Input.shep.ML-DmBG3-c2:FBgn0052423_SRR567585
GSE40797.shep.ML-DmBG3-c2_alternate-ab:FBgn0052423	GSE40797	shep	FBgn0052423	ML-DmBG3-c2	ML-DmBG3-c2	ML-DmBG3-c2	NA	ML-DmBG3-c2	alternate-ab	remap2022_GSE40797.shep.ML-DmBG3-c2_alternate-ab:FBgn0052423_SRR567588	remap2022_GSE40797.Input.shep.ML-DmBG3-c2_alternate-ab:FBgn0052423_SRR567585
GSE40797.su-Hw.ML-DmBG3-c2:FBgn0003567	GSE40797	su-Hw	FBgn0003567	ML-DmBG3-c2:FBgn0003567	ML-DmBG3-c2	ML-DmBG3-c2	NA	ML-DmBG3-c2		remap2022_GSE40797.su-Hw.ML-DmBG3-c2:FBgn0003567_SRR567586	remap2022_GSE40797.Input.su-Hw.ML-DmBG3-c2:FBgn0003567_SRR567585
GSE40957.brk.third-instar_wing-imaginal-disc:FBgn0024250	GSE40957	brk	FBgn0024250	third-instar	third_instar_larva	wing-imaginal-disc	NA	third_instar_larva.wing-imaginal-disc	wing-imaginal-disc	remap2022_GSE40957.brk.third-instar_wing-imaginal-disc:FBgn0024250_SRR572652
GSE40958.cbt.third-instar_wing-imaginal-disc:FBgn0043364	GSE40958	cbt	FBgn0043364	third-instar	third_instar_larva	wing-imaginal-disc	NA	third_instar_larva.wing-imaginal-disc	wing-imaginal-disc	remap2022_GSE40958.cbt.third-instar_wing-imaginal-disc:FBgn0043364_SRR572653
GSE41354.CTCF.S2-DRSC:FBgn0035769	GSE41354	CTCF	FBgn0035769	S2-DRSC:FBgn0035769	S2	S2	NA	S2		remap2022_GSE41354.CTCF.S2-DRSC:FBgn0035769_SRR580343	remap2022_GSE41354.Input.CTCF.S2-DRSC:FBgn0035769_SRR580345
GSE41354.CTCF.S2-DRSC_3AB:FBgn0035769	GSE41354	CTCF	FBgn0035769	S2-DRSC	S2	S2	NA	S2	3AB	remap2022_GSE41354.CTCF.S2-DRSC_3AB:FBgn0035769_SRR580344	remap2022_GSE41354.Input.CTCF.S2-DRSC_3AB:FBgn0035769_SRR580346
GSE41354.Cp190.S2-DRSC:FBgn0000283	GSE41354	Cp190	FBgn0000283	S2-DRSC:FBgn0000283	S2	S2	NA	S2		remap2022_GSE41354.Cp190.S2-DRSC:FBgn0000283_SRR580337	remap2022_GSE41354.Input.Cp190.S2-DRSC:FBgn0000283_SRR580345
GSE41354.Cp190.S2-DRSC_3AB:FBgn0000283	GSE41354	Cp190	FBgn0000283	S2-DRSC	S2	S2	NA	S2	3AB	remap2022_GSE41354.Cp190.S2-DRSC_3AB:FBgn0000283_SRR580338	remap2022_GSE41354.Input.Cp190.S2-DRSC_3AB:FBgn0000283_SRR580346
GSE41354.mod-mdg4.S2-DRSC:FBgn0002781	GSE41354	mod-mdg4	FBgn0002781	S2-DRSC:FBgn0002781	S2	S2	NA	S2		remap2022_GSE41354.mod-mdg4.S2-DRSC:FBgn0002781_SRR580341	remap2022_GSE41354.Input.mod-mdg4.S2-DRSC:FBgn0002781_SRR580345
GSE41354.mod-mdg4.S2-DRSC_3AB:FBgn0002781	GSE41354	mod-mdg4	FBgn0002781	S2-DRSC	S2	S2	NA	S2	3AB	remap2022_GSE41354.mod-mdg4.S2-DRSC_3AB:FBgn0002781_SRR580342	remap2022_GSE41354.Input.mod-mdg4.S2-DRSC_3AB:FBgn0002781_SRR580346
GSE41354.su-Hw.S2-DRSC:FBgn0003567	GSE41354	su-Hw	FBgn0003567	S2-DRSC:FBgn0003567	S2	S2	NA	S2		remap2022_GSE41354.su-Hw.S2-DRSC:FBgn0003567_SRR580339	remap2022_GSE41354.Input.su-Hw.S2-DRSC:FBgn0003567_SRR580345
GSE41354.su-Hw.S2-DRSC_3AB:FBgn0003567	GSE41354	su-Hw	FBgn0003567	S2-DRSC	S2	S2	NA	S2	3AB	remap2022_GSE41354.su-Hw.S2-DRSC_3AB:FBgn0003567_SRR580340	remap2022_GSE41354.Input.su-Hw.S2-DRSC_3AB:FBgn0003567_SRR580346
GSE41440.Lpt.Schneider-2:FBgn0263667	GSE41440	Lpt	FBgn0263667	Schneider-2:FBgn0263667	S2	S2	NA	S2		remap2022_GSE41440.Lpt.Schneider-2:FBgn0263667_SRR585064	remap2022_GSE41440.Input.Lpt.Schneider-2:FBgn0263667_SRR585060
GSE41440.Lpt.Schneider-2_WT:FBgn0263667	GSE41440	Lpt	FBgn0263667	Schneider-2	S2	S2	NA	S2	WT	remap2022_GSE41440.Lpt.Schneider-2_WT:FBgn0263667_SRR585049	remap2022_GSE41440.Input.Lpt.Schneider-2_WT:FBgn0263667_SRR585043
GSE41440.trr.Schneider-2_WT:FBgn0023518	GSE41440	trr	FBgn0023518	Schneider-2	S2	S2	NA	S2	WT	remap2022_GSE41440.trr.Schneider-2_WT:FBgn0023518_SRR585047	remap2022_GSE41440.Input.trr.Schneider-2_WT:FBgn0023518_SRR585046
GSE41700.Tbp.embryo_MBT:FBgn0003687	GSE41700	Tbp	FBgn0003687	embryo	embryo	whole_embryo	NA	embryo.whole_embryo	MBT	remap2022_GSE41700.Tbp.embryo_MBT:FBgn0003687_SRR596998,remap2022_GSE41700.Tbp.embryo_MBT:FBgn0003687_SRR596999	remap2022_GSE41700.Input.Tbp.embryo_MBT:FBgn0003687_SRR597000
GSE41700.Tbp.embryo_pre-MBT:FBgn0003687	GSE41700	Tbp	FBgn0003687	embryo	embryo	whole_embryo	NA	embryo.whole_embryo	pre-MBT	remap2022_GSE41700.Tbp.embryo_pre-MBT:FBgn0003687_SRR597011,remap2022_GSE41700.Tbp.embryo_pre-MBT:FBgn0003687_SRR597012	remap2022_GSE41700.Input.Tbp.embryo_pre-MBT:FBgn0003687_SRR597013
GSE42086.fs-1-h.Kc167_L:FBgn0004656	GSE42086	fs-1-h	FBgn0004656	Kc167	Kc	Kc	NA	Kc	L	remap2022_GSE42086.fs-1-h.Kc167_L:FBgn0004656_SRR611533,remap2022_GSE42086.fs-1-h.Kc167_L:FBgn0004656_SRR611534,remap2022_GSE42086.fs-1-h.Kc167_L:FBgn0004656_SRR954563	remap2022_GSE42086.Input.fs-1-h.Kc167_L:FBgn0004656_SRR611537
GSE42086.fs-1-h.Kc167_LS:FBgn0004656	GSE42086	fs-1-h	FBgn0004656	Kc167	Kc	Kc	NA	Kc	LS	remap2022_GSE42086.fs-1-h.Kc167_LS:FBgn0004656_SRR611535,remap2022_GSE42086.fs-1-h.Kc167_LS:FBgn0004656_SRR611536,remap2022_GSE42086.fs-1-h.Kc167_LS:FBgn0004656_SRR954564	remap2022_GSE42086.Input.fs-1-h.Kc167_LS:FBgn0004656_SRR611537
GSE42928.ab.larva_eye-antennal-imaginal-disc:FBgn0264442	GSE42928	ab	FBgn0264442	larva	larva	eye-antenna-imaginal-disc	NA	larva.eye-antenna-imaginal-disc	eye-antennal-imaginal-disc	remap2022_GSE42928.ab.larva_eye-antennal-imaginal-disc:FBgn0264442_SRR631786	remap2022_GSE42928.Input.ab.larva_eye-antennal-imaginal-disc:FBgn0264442_SRR631788
GSE42928.ab.larva_eye-antennal-imaginal-disc_scrib1:FBgn0264442	GSE42928	ab	FBgn0264442	larva	larva	eye-antenna-imaginal-disc	NA	larva.eye-antenna-imaginal-disc	eye-antennal-imaginal-disc,scrib1	remap2022_GSE42928.ab.larva_eye-antennal-imaginal-disc_scrib1:FBgn0264442_SRR631787	remap2022_GSE42928.Input.ab.larva_eye-antennal-imaginal-disc_scrib1:FBgn0264442_SRR631789
GSE44686.foxo.adult_15d_whole-fly_female_IPC-mut:FBgn0038197	GSE44686	foxo	FBgn0038197	adult	adult	whole-fly	15d	adult.whole-fly.15d	15d,whole-fly,female,IPC-mut	remap2022_GSE44686.foxo.adult_15d_whole-fly_female_IPC-mut:FBgn0038197_SRR765858,remap2022_GSE44686.foxo.adult_15d_whole-fly_female_IPC-mut:FBgn0038197_SRR765860	remap2022_GSE44686.Input.foxo.adult_15d_whole-fly_female_IPC-mut:FBgn0038197_SRR765857,remap2022_GSE44686.Input.foxo.adult_15d_whole-fly_female_IPC-mut:FBgn0038197_SRR765859
GSE44686.foxo.adult_whole-fly_female_chico-mut:FBgn0038197	GSE44686	foxo	FBgn0038197	adult	adult	whole-fly	NA	adult.whole-fly	whole-fly,female,chico-mut	remap2022_GSE44686.foxo.adult_whole-fly_female_chico-mut:FBgn0038197_SRR765854,remap2022_GSE44686.foxo.adult_whole-fly_female_chico-mut:FBgn0038197_SRR765856	remap2022_GSE44686.Input.foxo.adult_whole-fly_female_chico-mut:FBgn0038197_SRR765853,remap2022_GSE44686.Input.foxo.adult_whole-fly_female_chico-mut:FBgn0038197_SRR765855
GSE45293.BEAF-32.Kc167:FBgn0015602	GSE45293	BEAF-32	FBgn0015602	Kc167:FBgn0015602	Kc	Kc	NA	Kc		remap2022_GSE45293.BEAF-32.Kc167:FBgn0015602_SRR786744r1-SRR786744r2	remap2022_GSE45293.Input.BEAF-32.Kc167:FBgn0015602_SRR786750r1-SRR786750r2
GSE45293.CTCF.Kc167:FBgn0035769	GSE45293	CTCF	FBgn0035769	Kc167:FBgn0035769	Kc	Kc	NA	Kc		remap2022_GSE45293.CTCF.Kc167:FBgn0035769_SRR786746r1-SRR786746r2	remap2022_GSE45293.Input.CTCF.Kc167:FBgn0035769_SRR786750r1-SRR786750r2
GSE45293.Cp190.Kc167:FBgn0000283	GSE45293	Cp190	FBgn0000283	Kc167:FBgn0000283	Kc	Kc	NA	Kc		remap2022_GSE45293.Cp190.Kc167:FBgn0000283_SRR786745r1-SRR786745r2	remap2022_GSE45293.Input.Cp190.Kc167:FBgn0000283_SRR786750r1-SRR786750r2
GSE45293.su-Hw.Kc167:FBgn0003567	GSE45293	su-Hw	FBgn0003567	Kc167:FBgn0003567	Kc	Kc	NA	Kc		remap2022_GSE45293.su-Hw.Kc167:FBgn0003567_SRR786747r1-SRR786747r2	remap2022_GSE45293.Input.su-Hw.Kc167:FBgn0003567_SRR786750r1-SRR786750r2
GSE46614.Cp190.Schneider-2:FBgn0000283	GSE46614	Cp190	FBgn0000283	Schneider-2:FBgn0000283	S2	S2	NA	S2		remap2022_GSE46614.Cp190.Schneider-2:FBgn0000283_SRR837791	remap2022_GSE46614.Input.Cp190.Schneider-2:FBgn0000283_SRR837790
GSE46614.Ibf1.Schneider-2:FBgn0037670	GSE46614	Ibf1	FBgn0037670	Schneider-2:FBgn0037670	S2	S2	NA	S2		remap2022_GSE46614.Ibf1.Schneider-2:FBgn0037670_SRR837792	remap2022_GSE46614.Input.Ibf1.Schneider-2:FBgn0037670_SRR837790
GSE46614.Ibf2.Schneider-2:FBgn0037669	GSE46614	Ibf2	FBgn0037669	Schneider-2:FBgn0037669	S2	S2	NA	S2		remap2022_GSE46614.Ibf2.Schneider-2:FBgn0037669_SRR837793	remap2022_GSE46614.Input.Ibf2.Schneider-2:FBgn0037669_SRR837790
GSE49102.pzg.Schneider-2:FBgn0259785	GSE49102	pzg	FBgn0259785	Schneider-2:FBgn0259785	S2	S2	NA	S2		remap2022_GSE49102.pzg.Schneider-2:FBgn0259785_SRR942040	remap2022_GSE49102.Input.pzg.Schneider-2:FBgn0259785_SRR942041,remap2022_GSE49102.Input.pzg.Schneider-2:FBgn0259785_SRR942042
GSE49102.row.Schneider-2:FBgn0033998	GSE49102	row	FBgn0033998	Schneider-2:FBgn0033998	S2	S2	NA	S2		remap2022_GSE49102.row.Schneider-2:FBgn0033998_SRR942039	remap2022_GSE49102.Input.row.Schneider-2:FBgn0033998_SRR942041,remap2022_GSE49102.Input.row.Schneider-2:FBgn0033998_SRR942042
GSE49102.woc.Schneider-2:FBgn0010328	GSE49102	woc	FBgn0010328	Schneider-2:FBgn0010328	S2	S2	NA	S2		remap2022_GSE49102.woc.Schneider-2:FBgn0010328_SRR942038	remap2022_GSE49102.Input.woc.Schneider-2:FBgn0010328_SRR942041,remap2022_GSE49102.Input.woc.Schneider-2:FBgn0010328_SRR942042
GSE50771.Kr.embryo_blastoderm:FBgn0001325	GSE50771	Kr	FBgn0001325	embryo	embryo	blastoderm	NA	embryo.blastoderm	blastoderm	remap2022_GSE50771.Kr.embryo_blastoderm:FBgn0001325_SRR976151	remap2022_GSE50771.Input.Kr.embryo_blastoderm:FBgn0001325_SRR976143,remap2022_GSE50771.Input.Kr.embryo_blastoderm:FBgn0001325_SRR976144
GSE50771.bcd.embryo_blastoderm:FBgn0000166	GSE50771	bcd	FBgn0000166	embryo	embryo	blastoderm	NA	embryo.blastoderm	blastoderm	remap2022_GSE50771.bcd.embryo_blastoderm:FBgn0000166_SRR976145	remap2022_GSE50771.Input.bcd.embryo_blastoderm:FBgn0000166_SRR976143,remap2022_GSE50771.Input.bcd.embryo_blastoderm:FBgn0000166_SRR976144
GSE50771.gt.embryo_blastoderm:FBgn0001150	GSE50771	gt	FBgn0001150	embryo	embryo	blastoderm	NA	embryo.blastoderm	blastoderm	remap2022_GSE50771.gt.embryo_blastoderm:FBgn0001150_SRR976147,remap2022_GSE50771.gt.embryo_blastoderm:FBgn0001150_SRR976148	remap2022_GSE50771.Input.gt.embryo_blastoderm:FBgn0001150_SRR976143,remap2022_GSE50771.Input.gt.embryo_blastoderm:FBgn0001150_SRR976144
GSE50771.hb.embryo_blastoderm:FBgn0001180	GSE50771	hb	FBgn0001180	embryo	embryo	blastoderm	NA	embryo.blastoderm	blastoderm	remap2022_GSE50771.hb.embryo_blastoderm:FBgn0001180_SRR976149	remap2022_GSE50771.Input.hb.embryo_blastoderm:FBgn0001180_SRR976143,remap2022_GSE50771.Input.hb.embryo_blastoderm:FBgn0001180_SRR976144
GSE50771.hb.embryo_blastoderm_V46:FBgn0001180	GSE50771	hb	FBgn0001180	embryo	embryo	blastoderm	NA	embryo.blastoderm	blastoderm,V46	remap2022_GSE50771.hb.embryo_blastoderm_V46:FBgn0001180_SRR976150	remap2022_GSE50771.Input.hb.embryo_blastoderm_V46:FBgn0001180_SRR976143,remap2022_GSE50771.Input.hb.embryo_blastoderm_V46:FBgn0001180_SRR976144
GSE51134.AGO2.Schneider-2:FBgn0087035	GSE51134	AGO2	FBgn0087035	Schneider-2:FBgn0087035	S2	S2	NA	S2		remap2022_GSE51134.AGO2.Schneider-2:FBgn0087035_SRR1002329,remap2022_GSE51134.AGO2.Schneider-2:FBgn0087035_SRR1002330	remap2022_GSE51134.Input.AGO2.Schneider-2:FBgn0087035_SRR1002328
GSE51462.Cp190.Kc167:FBgn0000283	GSE51462	Cp190	FBgn0000283	Kc167:FBgn0000283	Kc	Kc	NA	Kc		remap2022_GSE51462.Cp190.Kc167:FBgn0000283_SRR1013774	remap2022_GSE51462.Input.Cp190.Kc167:FBgn0000283_SRR1013776
GSE51462.mod-mdg4.Kc167_guinea-pig:FBgn0002781	GSE51462	mod-mdg4	FBgn0002781	Kc167	Kc	Kc	NA	Kc	guinea-pig	remap2022_GSE51462.mod-mdg4.Kc167_guinea-pig:FBgn0002781_SRR1013777	remap2022_GSE51462.Input.mod-mdg4.Kc167_guinea-pig:FBgn0002781_SRR1013775
GSE51462.mod-mdg4.Kc167_rabbit:FBgn0002781	GSE51462	mod-mdg4	FBgn0002781	Kc167	Kc	Kc	NA	Kc	rabbit	remap2022_GSE51462.mod-mdg4.Kc167_rabbit:FBgn0002781_SRR1013778	remap2022_GSE51462.Input.mod-mdg4.Kc167_rabbit:FBgn0002781_SRR1013775
GSE51462.shep.Kc167_guinea-pig:FBgn0052423	GSE51462	shep	FBgn0052423	Kc167	Kc	Kc	NA	Kc	guinea-pig	remap2022_GSE51462.shep.Kc167_guinea-pig:FBgn0052423_SRR1013781	remap2022_GSE51462.Input.shep.Kc167_guinea-pig:FBgn0052423_SRR1013775
GSE51462.shep.Kc167_rabbit:FBgn0052423	GSE51462	shep	FBgn0052423	Kc167	Kc	Kc	NA	Kc	rabbit	remap2022_GSE51462.shep.Kc167_rabbit:FBgn0052423_SRR1013782	remap2022_GSE51462.Input.shep.Kc167_rabbit:FBgn0052423_SRR1013775
GSE51462.su-Hw.Kc167_rabbit:FBgn0003567	GSE51462	su-Hw	FBgn0003567	Kc167	Kc	Kc	NA	Kc	rabbit	remap2022_GSE51462.su-Hw.Kc167_rabbit:FBgn0003567_SRR1013783	remap2022_GSE51462.Input.su-Hw.Kc167_rabbit:FBgn0003567_SRR1013775
GSE52029.Tbp.embryo_2h-4h_ab-517_homemade:FBgn0003687	GSE52029	Tbp	FBgn0003687	embryo	embryo	whole_embryo	2-4h	embryo.whole_embryo.2-4h	2h-4h,ab-517,homemade	remap2022_GSE52029.Tbp.embryo_2h-4h_ab-517_homemade:FBgn0003687_SRR1023762
GSE52029.Tbp.embryo_2h-4h_ab-518_homemade:FBgn0003687	GSE52029	Tbp	FBgn0003687	embryo	embryo	whole_embryo	2-4h	embryo.whole_embryo.2-4h	2h-4h,ab-518,homemade	remap2022_GSE52029.Tbp.embryo_2h-4h_ab-518_homemade:FBgn0003687_SRR1023763
GSE52029.Trf2.embryo_2h-4h_ab-274_homemade:FBgn0261793	GSE52029	Trf2	FBgn0261793	embryo	embryo	whole_embryo	2-4h	embryo.whole_embryo.2-4h	2h-4h,ab-274,homemade	remap2022_GSE52029.Trf2.embryo_2h-4h_ab-274_homemade:FBgn0261793_SRR1023764
GSE52029.Trf2.embryo_2h-4h_ab-275_homemade:FBgn0261793	GSE52029	Trf2	FBgn0261793	embryo	embryo	whole_embryo	2-4h	embryo.whole_embryo.2-4h	2h-4h,ab-275,homemade	remap2022_GSE52029.Trf2.embryo_2h-4h_ab-275_homemade:FBgn0261793_SRR1023765
GSE52240.Cp190.third-instar:FBgn0000283	GSE52240	Cp190	FBgn0000283	third-instar:FBgn0000283	third_instar_larva	whole_larva	NA	third_instar_larva.whole_larva		remap2022_GSE52240.Cp190.third-instar:FBgn0000283_SRR1027843	remap2022_GSE52240.Input.Cp190.third-instar:FBgn0000283_SRR1027842
GSE52240.Cp190.third-instar_Ibf2-cg9740-KO:FBgn0000283	GSE52240	Cp190	FBgn0000283	third-instar	third_instar_larva	whole_larva	NA	third_instar_larva.whole_larva	Ibf2-cg9740-KO	remap2022_GSE52240.Cp190.third-instar_Ibf2-cg9740-KO:FBgn0000283_SRR1027845	remap2022_GSE52240.Input.Cp190.third-instar_Ibf2-cg9740-KO:FBgn0000283_SRR1027844
GSE52886.Cp190.Schneider-2:FBgn0000283	GSE52886	Cp190	FBgn0000283	Schneider-2:FBgn0000283	S2	S2	NA	S2		remap2022_GSE52886.Cp190.Schneider-2:FBgn0000283_SRR1041448,remap2022_GSE52886.Cp190.Schneider-2:FBgn0000283_SRR1041449	remap2022_GSE52886.Input.Cp190.Schneider-2:FBgn0000283_SRR1041450
GSE52886.Cp190.Schneider-2_mut:FBgn0000283	GSE52886	Cp190	FBgn0000283	Schneider-2	S2	S2	NA	S2	mut	remap2022_GSE52886.Cp190.Schneider-2_mut:FBgn0000283_SRR1041451	remap2022_GSE52886.Input.Cp190.Schneider-2_mut:FBgn0000283_SRR1041450
GSE52943.so.third-instar_eye-antennal-imaginal_disc:FBgn0003460	GSE52943	so	FBgn0003460	third-instar	third_instar_larva	eye-antenna-imaginal-discdisc	NA	third_instar_larva.eye-antenna-imaginal-discdisc	eye-antennal-imaginal,disc	remap2022_GSE52943.so.third-instar_eye-antennal-imaginal_disc:FBgn0003460_SRR1041952,remap2022_GSE52943.so.third-instar_eye-antennal-imaginal_disc:FBgn0003460_SRR1041953
GSE52943.so.third-instar_eye-antennal-imaginal_disc_Ctrl:FBgn0003460	GSE52943	so	FBgn0003460	third-instar	third_instar_larva	eye-antenna-imaginal-discdisc	NA	third_instar_larva.eye-antenna-imaginal-discdisc	eye-antennal-imaginal,disc,Ctrl	remap2022_GSE52943.so.third-instar_eye-antennal-imaginal_disc_Ctrl:FBgn0003460_SRR1041954
GSE54337.ZIPIC.Schneider-2:FBgn0039740	GSE54337	ZIPIC	FBgn0039740	Schneider-2:FBgn0039740	S2	S2	NA	S2		remap2022_GSE54337.ZIPIC.Schneider-2:FBgn0039740_SRR1141009	remap2022_GSE54337.Input.ZIPIC.Schneider-2:FBgn0039740_SRR1141010
GSE54337.pita.Schneider-2:FBgn0034878	GSE54337	pita	FBgn0034878	Schneider-2:FBgn0034878	S2	S2	NA	S2		remap2022_GSE54337.pita.Schneider-2:FBgn0034878_SRR1141008	remap2022_GSE54337.Input.pita.Schneider-2:FBgn0034878_SRR1141010
GSE54438.JIL-1.third-instar_salivary-gland:FBgn0020412	GSE54438	JIL-1	FBgn0020412	third-instar	third_instar_larva	salivary-gland	NA	third_instar_larva.salivary-gland	salivary-gland	remap2022_GSE54438.JIL-1.third-instar_salivary-gland:FBgn0020412_SRR1145605,remap2022_GSE54438.JIL-1.third-instar_salivary-gland:FBgn0020412_SRR1145606	remap2022_GSE54438.Input.JIL-1.third-instar_salivary-gland:FBgn0020412_SRR1145612,remap2022_GSE54438.Input.JIL-1.third-instar_salivary-gland:FBgn0020412_SRR1145613,remap2022_GSE54438.Input.JIL-1.third-instar_salivary-gland:FBgn0020412_SRR1145614
GSE54529.Cap-H2.Kc167_CTCF-RNAi:FBgn0037831	GSE54529	Cap-H2	FBgn0037831	Kc167	Kc	Kc	NA	Kc	CTCF-RNAi	remap2022_GSE54529.Cap-H2.Kc167_CTCF-RNAi:FBgn0037831_SRR1217608r1-SRR1217608r2	remap2022_GSE54529.Input.Cap-H2.Kc167_CTCF-RNAi:FBgn0037831_SRR1217610r1-SRR1217610r2
GSE54529.Cap-H2.Kc167_asynchronous:FBgn0037831	GSE54529	Cap-H2	FBgn0037831	Kc167	Kc	Kc	NA	Kc	asynchronous	remap2022_GSE54529.Cap-H2.Kc167_asynchronous:FBgn0037831_SRR1151104r1-SRR1151104r2
GSE54529.Cap-H2.Kc167_interphase:FBgn0037831	GSE54529	Cap-H2	FBgn0037831	Kc167	Kc	Kc	NA	Kc	interphase	remap2022_GSE54529.Cap-H2.Kc167_interphase:FBgn0037831_SRR1151103r1-SRR1151103r2
GSE54529.Chro.Kc167:FBgn0044324	GSE54529	Chro	FBgn0044324	Kc167:FBgn0044324	Kc	Kc	NA	Kc		remap2022_GSE54529.Chro.Kc167:FBgn0044324_SRR1151105r1-SRR1151105r2
GSE54529.Cp190.Kc167:FBgn0000283	GSE54529	Cp190	FBgn0000283	Kc167:FBgn0000283	Kc	Kc	NA	Kc		remap2022_GSE54529.Cp190.Kc167:FBgn0000283_SRR1151107r1-SRR1151107r2
GSE54529.Cp190.Kc167_CTCF-RNAi:FBgn0000283	GSE54529	Cp190	FBgn0000283	Kc167	Kc	Kc	NA	Kc	CTCF-RNAi	remap2022_GSE54529.Cp190.Kc167_CTCF-RNAi:FBgn0000283_SRR1217609r1-SRR1217609r2	remap2022_GSE54529.Input.Cp190.Kc167_CTCF-RNAi:FBgn0000283_SRR1217610r1-SRR1217610r2
GSE54529.TfIIIC.Kc167:FBgn0017460	GSE54529	TfIIIC	FBgn0017460	Kc167:FBgn0017460	Kc	Kc	NA	Kc		remap2022_GSE54529.TfIIIC.Kc167:FBgn0017460_SRR1151097r1-SRR1151097r2,remap2022_GSE54529.TfIIIC.Kc167:FBgn0017460_SRR1151098r1-SRR1151098r2,remap2022_GSE54529.TfIIIC.Kc167:FBgn0017460_SRR1151099r1-SRR1151099r2
GSE54529.TfIIIC.Kc167_CTCF-RNAi:FBgn0017460	GSE54529	TfIIIC	FBgn0017460	Kc167	Kc	Kc	NA	Kc	CTCF-RNAi	remap2022_GSE54529.TfIIIC.Kc167_CTCF-RNAi:FBgn0017460_SRR1217606r1-SRR1217606r2	remap2022_GSE54529.Input.TfIIIC.Kc167_CTCF-RNAi:FBgn0017460_SRR1217610r1-SRR1217610r2
GSE54529.Trl.Kc167:FBgn0013263	GSE54529	Trl	FBgn0013263	Kc167:FBgn0013263	Kc	Kc	NA	Kc		remap2022_GSE54529.Trl.Kc167:FBgn0013263_SRR1151106r1-SRR1151106r2
GSE54529.barr.Kc167_interphase:FBgn0014127	GSE54529	barr	FBgn0014127	Kc167	Kc	Kc	NA	Kc	interphase	remap2022_GSE54529.barr.Kc167_interphase:FBgn0014127_SRR1151101r1-SRR1151101r2
GSE54529.vtd.Kc167:FBgn0260987	GSE54529	vtd	FBgn0260987	Kc167:FBgn0260987	Kc	Kc	NA	Kc		remap2022_GSE54529.vtd.Kc167:FBgn0260987_SRR1151100r1-SRR1151100r2
GSE54529.vtd.Kc167_CTCF-RNAi:FBgn0260987	GSE54529	vtd	FBgn0260987	Kc167	Kc	Kc	NA	Kc	CTCF-RNAi	remap2022_GSE54529.vtd.Kc167_CTCF-RNAi:FBgn0260987_SRR1217607r1-SRR1217607r2	remap2022_GSE54529.Input.vtd.Kc167_CTCF-RNAi:FBgn0260987_SRR1217610r1-SRR1217610r2
GSE54601.sd.third-instar_eye-disk:FBgn0003345	GSE54601	sd	FBgn0003345	third-instar	third_instar_larva	eye-disc	NA	third_instar_larva.eye-disc	eye-disk	remap2022_GSE54601.sd.third-instar_eye-disk:FBgn0003345_SRR1153274	remap2022_GSE54601.Input.sd.third-instar_eye-disk:FBgn0003345_SRR1153275
GSE54601.yki.third-instar_eye-disk:FBgn0034970	GSE54601	yki	FBgn0034970	third-instar	third_instar_larva	eye-disc	NA	third_instar_larva.eye-disc	eye-disk	remap2022_GSE54601.yki.third-instar_eye-disk:FBgn0034970_SRR1153273	remap2022_GSE54601.Input.yki.third-instar_eye-disk:FBgn0034970_SRR1153275
GSE55257.CTCF.embryo_5h-13h_PS7:FBgn0035769	GSE55257	CTCF	FBgn0035769	embryo	embryo	whole_embryo	5-13h	embryo.whole_embryo.5-13h	5h-13h,PS7	remap2022_GSE55257.CTCF.embryo_5h-13h_PS7:FBgn0035769_SRR1174430r1-SRR1174430r2,remap2022_GSE55257.CTCF.embryo_5h-13h_PS7:FBgn0035769_SRR1174431r1-SRR1174431r2	remap2022_GSE55257.Input.CTCF.embryo_5h-13h_PS7:FBgn0035769_SRR1174456r1-SRR1174456r2,remap2022_GSE55257.Input.CTCF.embryo_5h-13h_PS7:FBgn0035769_SRR1174457r1-SRR1174457r2
GSE55257.CTCF.embryo_5h-13h_mixed:FBgn0035769	GSE55257	CTCF	FBgn0035769	embryo	embryo	whole_embryo	5-13h	embryo.whole_embryo.5-13h	5h-13h,mixed	remap2022_GSE55257.CTCF.embryo_5h-13h_mixed:FBgn0035769_SRR1174429r1-SRR1174429r2,remap2022_GSE55257.CTCF.embryo_5h-13h_mixed:FBgn0035769_SRR1538975r1-SRR1538975r2	remap2022_GSE55257.Input.CTCF.embryo_5h-13h_mixed:FBgn0035769_SRR1174455r1-SRR1174455r2,remap2022_GSE55257.Input.CTCF.embryo_5h-13h_mixed:FBgn0035769_SRR1538988r1-SRR1538988r2
GSE55257.Cp190.embryo_5h-13h_PS7:FBgn0000283	GSE55257	Cp190	FBgn0000283	embryo	embryo	whole_embryo	5-13h	embryo.whole_embryo.5-13h	5h-13h,PS7	remap2022_GSE55257.Cp190.embryo_5h-13h_PS7:FBgn0000283_SRR1554221r1-SRR1554221r2,remap2022_GSE55257.Cp190.embryo_5h-13h_PS7:FBgn0000283_SRR1554222r1-SRR1554222r2	remap2022_GSE55257.Input.Cp190.embryo_5h-13h_PS7:FBgn0000283_SRR1554225r1-SRR1554225r2,remap2022_GSE55257.Input.Cp190.embryo_5h-13h_PS7:FBgn0000283_SRR1554226r1-SRR1554226r2
GSE55257.Cp190.embryo_5h-13h_mixed:FBgn0000283	GSE55257	Cp190	FBgn0000283	embryo	embryo	whole_embryo	5-13h	embryo.whole_embryo.5-13h	5h-13h,mixed	remap2022_GSE55257.Cp190.embryo_5h-13h_mixed:FBgn0000283_SRR1554219r1-SRR1554219r2,remap2022_GSE55257.Cp190.embryo_5h-13h_mixed:FBgn0000283_SRR1554220r1-SRR1554220r2	remap2022_GSE55257.Input.Cp190.embryo_5h-13h_mixed:FBgn0000283_SRR1554223r1-SRR1554223r2,remap2022_GSE55257.Input.Cp190.embryo_5h-13h_mixed:FBgn0000283_SRR1554224r1-SRR1554224r2
GSE55257.Pc.embryo_5h-13h_PS7:FBgn0003042	GSE55257	Pc	FBgn0003042	embryo	embryo	whole_embryo	5-13h	embryo.whole_embryo.5-13h	5h-13h,PS7	remap2022_GSE55257.Pc.embryo_5h-13h_PS7:FBgn0003042_SRR1538980r1-SRR1538980r2,remap2022_GSE55257.Pc.embryo_5h-13h_PS7:FBgn0003042_SRR1538981r1-SRR1538981r2	remap2022_GSE55257.Input.Pc.embryo_5h-13h_PS7:FBgn0003042_SRR1538992r1-SRR1538992r2,remap2022_GSE55257.Input.Pc.embryo_5h-13h_PS7:FBgn0003042_SRR1538993r1-SRR1538993r2
GSE55257.Pc.embryo_5h-13h_mixed:FBgn0003042	GSE55257	Pc	FBgn0003042	embryo	embryo	whole_embryo	5-13h	embryo.whole_embryo.5-13h	5h-13h,mixed	remap2022_GSE55257.Pc.embryo_5h-13h_mixed:FBgn0003042_SRR1538982r1-SRR1538982r2,remap2022_GSE55257.Pc.embryo_5h-13h_mixed:FBgn0003042_SRR1538983r1-SRR1538983r2	remap2022_GSE55257.Input.Pc.embryo_5h-13h_mixed:FBgn0003042_SRR1538994r1-SRR1538994r2,remap2022_GSE55257.Input.Pc.embryo_5h-13h_mixed:FBgn0003042_SRR1538995r1-SRR1538995r2
GSE55257.Su-z-12.embryo_5h-13h_PS7:FBgn0020887	GSE55257	Su-z-12	FBgn0020887	embryo	embryo	whole_embryo	5-13h	embryo.whole_embryo.5-13h	5h-13h,PS7	remap2022_GSE55257.Su-z-12.embryo_5h-13h_PS7:FBgn0020887_SRR1538984r1-SRR1538984r2,remap2022_GSE55257.Su-z-12.embryo_5h-13h_PS7:FBgn0020887_SRR1538985r1-SRR1538985r2	remap2022_GSE55257.Input.Su-z-12.embryo_5h-13h_PS7:FBgn0020887_SRR1538996r1-SRR1538996r2,remap2022_GSE55257.Input.Su-z-12.embryo_5h-13h_PS7:FBgn0020887_SRR1538997r1-SRR1538997r2
GSE55257.Su-z-12.embryo_5h-13h_mixed:FBgn0020887	GSE55257	Su-z-12	FBgn0020887	embryo	embryo	whole_embryo	5-13h	embryo.whole_embryo.5-13h	5h-13h,mixed	remap2022_GSE55257.Su-z-12.embryo_5h-13h_mixed:FBgn0020887_SRR1538986r1-SRR1538986r2,remap2022_GSE55257.Su-z-12.embryo_5h-13h_mixed:FBgn0020887_SRR1538987r1-SRR1538987r2	remap2022_GSE55257.Input.Su-z-12.embryo_5h-13h_mixed:FBgn0020887_SRR1538999r1-SRR1538999r2
GSE55257.ph.embryo_5h-13h_PS7:FBgn0004861-FBgn0004860	GSE55257	ph	FBgn0004861-FBgn0004860	embryo	embryo	whole_embryo	5-13h	embryo.whole_embryo.5-13h	5h-13h,PS7	remap2022_GSE55257.ph.embryo_5h-13h_PS7:FBgn0004861-FBgn0004860_SRR1174442r1-SRR1174442r2,remap2022_GSE55257.ph.embryo_5h-13h_PS7:FBgn0004861-FBgn0004860_SRR1174443r1-SRR1174443r2	remap2022_GSE55257.Input.ph.embryo_5h-13h_PS7:FBgn0004861-FBgn0004860_SRR1174467r1-SRR1174467r2,remap2022_GSE55257.Input.ph.embryo_5h-13h_PS7:FBgn0004861-FBgn0004860_SRR1174468r1-SRR1174468r2
GSE55257.ph.embryo_5h-13h_mixed:FBgn0004861-FBgn0004860	GSE55257	ph	FBgn0004861-FBgn0004860	embryo	embryo	whole_embryo	5-13h	embryo.whole_embryo.5-13h	5h-13h,mixed	remap2022_GSE55257.ph.embryo_5h-13h_mixed:FBgn0004861-FBgn0004860_SRR1174440r1-SRR1174440r2,remap2022_GSE55257.ph.embryo_5h-13h_mixed:FBgn0004861-FBgn0004860_SRR1174441r1-SRR1174441r2	remap2022_GSE55257.Input.ph.embryo_5h-13h_mixed:FBgn0004861-FBgn0004860_SRR1174466r1-SRR1174466r2
GSE55303.Pc.Schneider-2:FBgn0003042	GSE55303	Pc	FBgn0003042	Schneider-2:FBgn0003042	S2	S2	NA	S2		remap2022_GSE55303.Pc.Schneider-2:FBgn0003042_SRR1175639,remap2022_GSE55303.Pc.Schneider-2:FBgn0003042_SRR1175640,remap2022_GSE55303.Pc.Schneider-2:FBgn0003042_SRR1175641,remap2022_GSE55303.Pc.Schneider-2:FBgn0003042_SRR1175642,remap2022_GSE55303.Pc.Schneider-2:FBgn0003042_SRR1175643,remap2022_GSE55303.Pc.Schneider-2:FBgn0003042_SRR1175644,remap2022_GSE55303.Pc.Schneider-2:FBgn0003042_SRR1175645,…	remap2022_GSE55303.Input.Pc.Schneider-2:FBgn0003042_SRR1175664,remap2022_GSE55303.Input.Pc.Schneider-2:FBgn0003042_SRR1175665,remap2022_GSE55303.Input.Pc.Schneider-2:FBgn0003042_SRR1175666,remap2022_GSE55303.Input.Pc.Schneider-2:FBgn0003042_SRR1175667,remap2022_GSE55303.Input.Pc.Schneider-2:FBgn0003042_SRR1175668,remap2022_GSE55303.Input.Pc.Schneider-2:FBgn0003042_SRR1175669,remap2022_GSE55303.In…
GSE55303.smt3.Schneider-2:FBgn0264922	GSE55303	smt3	FBgn0264922	Schneider-2:FBgn0264922	S2	S2	NA	S2		remap2022_GSE55303.smt3.Schneider-2:FBgn0264922_SRR1175586,remap2022_GSE55303.smt3.Schneider-2:FBgn0264922_SRR1175587,remap2022_GSE55303.smt3.Schneider-2:FBgn0264922_SRR1175588,remap2022_GSE55303.smt3.Schneider-2:FBgn0264922_SRR1175589,remap2022_GSE55303.smt3.Schneider-2:FBgn0264922_SRR1175590,remap2022_GSE55303.smt3.Schneider-2:FBgn0264922_SRR1175591,remap2022_GSE55303.smt3.Schneider-2:FBgn02649…	remap2022_GSE55303.Input.smt3.Schneider-2:FBgn0264922_SRR1175664,remap2022_GSE55303.Input.smt3.Schneider-2:FBgn0264922_SRR1175665,remap2022_GSE55303.Input.smt3.Schneider-2:FBgn0264922_SRR1175666,remap2022_GSE55303.Input.smt3.Schneider-2:FBgn0264922_SRR1175667,remap2022_GSE55303.Input.smt3.Schneider-2:FBgn0264922_SRR1175668,remap2022_GSE55303.Input.smt3.Schneider-2:FBgn0264922_SRR1175669,remap2022…
GSE55303.velo.Schneider-2:FBgn0035713	GSE55303	velo	FBgn0035713	Schneider-2:FBgn0035713	S2	S2	NA	S2		remap2022_GSE55303.velo.Schneider-2:FBgn0035713_SRR1175612,remap2022_GSE55303.velo.Schneider-2:FBgn0035713_SRR1175613,remap2022_GSE55303.velo.Schneider-2:FBgn0035713_SRR1175614,remap2022_GSE55303.velo.Schneider-2:FBgn0035713_SRR1175615,remap2022_GSE55303.velo.Schneider-2:FBgn0035713_SRR1175616,remap2022_GSE55303.velo.Schneider-2:FBgn0035713_SRR1175617,remap2022_GSE55303.velo.Schneider-2:FBgn00357…	remap2022_GSE55303.Input.velo.Schneider-2:FBgn0035713_SRR1175664,remap2022_GSE55303.Input.velo.Schneider-2:FBgn0035713_SRR1175665,remap2022_GSE55303.Input.velo.Schneider-2:FBgn0035713_SRR1175666,remap2022_GSE55303.Input.velo.Schneider-2:FBgn0035713_SRR1175667,remap2022_GSE55303.Input.velo.Schneider-2:FBgn0035713_SRR1175668,remap2022_GSE55303.Input.velo.Schneider-2:FBgn0035713_SRR1175669,remap2022…
GSE55306.Max.Schneider-2_sc-28209:FBgn0017578	GSE55306	Max	FBgn0017578	Schneider-2	S2	S2	NA	S2	sc-28209	remap2022_GSE55306.Max.Schneider-2_sc-28209:FBgn0017578_SRR1185444
GSE55306.twi.embryo_2h-4h-AEL_homemade:FBgn0003900	GSE55306	twi	FBgn0003900	embryo	embryo	whole_embryo	2-4h	embryo.whole_embryo.2-4h	2h-4h-AEL,homemade	remap2022_GSE55306.twi.embryo_2h-4h-AEL_homemade:FBgn0003900_SRR4014594
GSE56101.ADD1.Schneider-2:FBgn0026573	GSE56101	ADD1	FBgn0026573	Schneider-2:FBgn0026573	S2	S2	NA	S2		remap2022_GSE56101.ADD1.Schneider-2:FBgn0026573_SRR1217232,remap2022_GSE56101.ADD1.Schneider-2:FBgn0026573_SRR1217234	remap2022_GSE56101.Input.ADD1.Schneider-2:FBgn0026573_SRR1217233,remap2022_GSE56101.Input.ADD1.Schneider-2:FBgn0026573_SRR1217235
GSE56101.HIPP1.Schneider-2:FBgn0037027	GSE56101	HIPP1	FBgn0037027	Schneider-2:FBgn0037027	S2	S2	NA	S2		remap2022_GSE56101.HIPP1.Schneider-2:FBgn0037027_SRR1217236,remap2022_GSE56101.HIPP1.Schneider-2:FBgn0037027_SRR1217238	remap2022_GSE56101.Input.HIPP1.Schneider-2:FBgn0037027_SRR1217237,remap2022_GSE56101.Input.HIPP1.Schneider-2:FBgn0037027_SRR1217239
GSE56101.Su-var-205.Schneider-2_priming:FBgn0003607	GSE56101	Su-var-205	FBgn0003607	Schneider-2	S2	S2	NA	S2	priming	remap2022_GSE56101.Su-var-205.Schneider-2_priming:FBgn0003607_SRR1391067,remap2022_GSE56101.Su-var-205.Schneider-2_priming:FBgn0003607_SRR1391069	remap2022_GSE56101.Input.Su-var-205.Schneider-2_priming:FBgn0003607_SRR1391068,remap2022_GSE56101.Input.Su-var-205.Schneider-2_priming:FBgn0003607_SRR1391070
GSE56101.msl-3.Schneider-2:FBgn0002775	GSE56101	msl-3	FBgn0002775	Schneider-2:FBgn0002775	S2	S2	NA	S2		remap2022_GSE56101.msl-3.Schneider-2:FBgn0002775_SRR1217228	remap2022_GSE56101.Input.msl-3.Schneider-2:FBgn0002775_SRR1217229
GSE56101.msl-3.Schneider-2_priming:FBgn0002775	GSE56101	msl-3	FBgn0002775	Schneider-2	S2	S2	NA	S2	priming	remap2022_GSE56101.msl-3.Schneider-2_priming:FBgn0002775_SRR1391063,remap2022_GSE56101.msl-3.Schneider-2_priming:FBgn0002775_SRR1391065	remap2022_GSE56101.Input.msl-3.Schneider-2_priming:FBgn0002775_SRR1391064,remap2022_GSE56101.Input.msl-3.Schneider-2_priming:FBgn0002775_SRR1391066
GSE56347.Su-var-205.third-instar_male:FBgn0003607	GSE56347	Su-var-205	FBgn0003607	third-instar	third_instar_larva	whole_larva	NA	third_instar_larva.whole_larva	male	remap2022_GSE56347.Su-var-205.third-instar_male:FBgn0003607_SRR1213166,remap2022_GSE56347.Su-var-205.third-instar_male:FBgn0003607_SRR1213167	remap2022_GSE56347.Input.Su-var-205.third-instar_male:FBgn0003607_SRR1213172
GSE56347.Su-var-205.third-instar_male_piwi-mut:FBgn0003607	GSE56347	Su-var-205	FBgn0003607	third-instar	third_instar_larva	whole_larva	NA	third_instar_larva.whole_larva	male,piwi-mut	remap2022_GSE56347.Su-var-205.third-instar_male_piwi-mut:FBgn0003607_SRR1213174,remap2022_GSE56347.Su-var-205.third-instar_male_piwi-mut:FBgn0003607_SRR1213175	remap2022_GSE56347.Input.Su-var-205.third-instar_male_piwi-mut:FBgn0003607_SRR1213180
GSE58821.msl-1.third-instar_salivary-glands_female_AA1-584:FBgn0005617	GSE58821	msl-1	FBgn0005617	third-instar	third_instar_larva	salivary-gland	NA	third_instar_larva.salivary-gland	salivary-glands,female,AA1-584	remap2022_GSE58821.msl-1.third-instar_salivary-glands_female_AA1-584:FBgn0005617_SRR1737835	remap2022_GSE58821.Input.msl-1.third-instar_salivary-glands_female_AA1-584:FBgn0005617_SRR1737836
GSE58821.msl-1.third-instar_salivary-glands_male_AA1-584:FBgn0005617	GSE58821	msl-1	FBgn0005617	third-instar	third_instar_larva	salivary-gland	NA	third_instar_larva.salivary-gland	salivary-glands,male,AA1-584	remap2022_GSE58821.msl-1.third-instar_salivary-glands_male_AA1-584:FBgn0005617_SRR1737833	remap2022_GSE58821.Input.msl-1.third-instar_salivary-glands_male_AA1-584:FBgn0005617_SRR1737834
GSE58935.zld.embryo:FBgn0259789	GSE58935	zld	FBgn0259789	embryo:FBgn0259789	embryo	whole_embryo	NA	embryo.whole_embryo		remap2022_GSE58935.zld.embryo:FBgn0259789_SRR1508419	remap2022_GSE58935.Input.zld.embryo:FBgn0259789_SRR1505738
GSE58935.zld.embryo_zld-mut:FBgn0259789	GSE58935	zld	FBgn0259789	embryo	embryo	whole_embryo	NA	embryo.whole_embryo	zld-mut	remap2022_GSE58935.zld.embryo_zld-mut:FBgn0259789_SRR1508420	remap2022_GSE58935.Input.zld.embryo_zld-mut:FBgn0259789_SRR1505738
GSE59078.CTCF.third-instar_eye-antennal-disc:FBgn0035769	GSE59078	CTCF	FBgn0035769	third-instar	third_instar_larva	eye-antenna-imaginal-disc	NA	third_instar_larva.eye-antenna-imaginal-disc	eye-antennal-disc	remap2022_GSE59078.CTCF.third-instar_eye-antennal-disc:FBgn0035769_SRR1506118	remap2022_GSE59078.Input.CTCF.third-instar_eye-antennal-disc:FBgn0035769_SRR1506119
GSE59192.E-z.embryo_0h-16h_rev:FBgn0000629	GSE59192	E-z	FBgn0000629	embryo	embryo	whole_embryo	0-16h	embryo.whole_embryo.0-16h	0h-16h,rev	remap2022_GSE59192.E-z.embryo_0h-16h_rev:FBgn0000629_SRR1508951	remap2022_GSE59192.Input.E-z.embryo_0h-16h_rev:FBgn0000629_SRR1508955
GSE59726.Su-H.embryo_2h-4h_goat-ab_sc-15813:FBgn0004837	GSE59726	Su-H	FBgn0004837	embryo	embryo	whole_embryo	2-4h	embryo.whole_embryo.2-4h	2h-4h,goat-ab,sc-15813	remap2022_GSE59726.Su-H.embryo_2h-4h_goat-ab_sc-15813:FBgn0004837_SRR1524297,remap2022_GSE59726.Su-H.embryo_2h-4h_goat-ab_sc-15813:FBgn0004837_SRR1524298	remap2022_GSE59726.Input.Su-H.embryo_2h-4h_goat-ab_sc-15813:FBgn0004837_SRR1524301,remap2022_GSE59726.Input.Su-H.embryo_2h-4h_goat-ab_sc-15813:FBgn0004837_SRR1524302,remap2022_GSE59726.Input.Su-H.embryo_2h-4h_goat-ab_sc-15813:FBgn0004837_SRR1524303
GSE59726.Su-H.embryo_2h-4h_rabbit-ab_sc-15813:FBgn0004837	GSE59726	Su-H	FBgn0004837	embryo	embryo	whole_embryo	2-4h	embryo.whole_embryo.2-4h	2h-4h,rabbit-ab,sc-15813	remap2022_GSE59726.Su-H.embryo_2h-4h_rabbit-ab_sc-15813:FBgn0004837_SRR1524299,remap2022_GSE59726.Su-H.embryo_2h-4h_rabbit-ab_sc-15813:FBgn0004837_SRR1524300	remap2022_GSE59726.Input.Su-H.embryo_2h-4h_rabbit-ab_sc-15813:FBgn0004837_SRR1524301,remap2022_GSE59726.Input.Su-H.embryo_2h-4h_rabbit-ab_sc-15813:FBgn0004837_SRR1524302,remap2022_GSE59726.Input.Su-H.embryo_2h-4h_rabbit-ab_sc-15813:FBgn0004837_SRR1524303
GSE60428.Dsp1.embryo_4h-12h:FBgn0278608	GSE60428	Dsp1	FBgn0278608	embryo	embryo	whole_embryo	4-12h	embryo.whole_embryo.4-12h	4h-12h	remap2022_GSE60428.Dsp1.embryo_4h-12h:FBgn0278608_SRR1552241,remap2022_GSE60428.Dsp1.embryo_4h-12h:FBgn0278608_SRR1552265	remap2022_GSE60428.Input.Dsp1.embryo_4h-12h:FBgn0278608_SRR1552243,remap2022_GSE60428.Input.Dsp1.embryo_4h-12h:FBgn0278608_SRR1552267
GSE60428.Pc.embryo_4h-12h:FBgn0003042	GSE60428	Pc	FBgn0003042	embryo	embryo	whole_embryo	4-12h	embryo.whole_embryo.4-12h	4h-12h	remap2022_GSE60428.Pc.embryo_4h-12h:FBgn0003042_SRR1552240,remap2022_GSE60428.Pc.embryo_4h-12h:FBgn0003042_SRR1552264	remap2022_GSE60428.Input.Pc.embryo_4h-12h:FBgn0003042_SRR1552243,remap2022_GSE60428.Input.Pc.embryo_4h-12h:FBgn0003042_SRR1552267
GSE60428.Pc.embryo_4h-12h_Phdel:FBgn0003042	GSE60428	Pc	FBgn0003042	embryo	embryo	whole_embryo	4-12h	embryo.whole_embryo.4-12h	4h-12h,Phdel	remap2022_GSE60428.Pc.embryo_4h-12h_Phdel:FBgn0003042_SRR1552295,remap2022_GSE60428.Pc.embryo_4h-12h_Phdel:FBgn0003042_SRR1552301	remap2022_GSE60428.Input.Pc.embryo_4h-12h_Phdel:FBgn0003042_SRR1552293,remap2022_GSE60428.Input.Pc.embryo_4h-12h_Phdel:FBgn0003042_SRR1552299
GSE60428.Pc.embryo_4h-12h_WT:FBgn0003042	GSE60428	Pc	FBgn0003042	embryo	embryo	whole_embryo	4-12h	embryo.whole_embryo.4-12h	4h-12h,WT	remap2022_GSE60428.Pc.embryo_4h-12h_WT:FBgn0003042_SRR1552292,remap2022_GSE60428.Pc.embryo_4h-12h_WT:FBgn0003042_SRR1552298	remap2022_GSE60428.Input.Pc.embryo_4h-12h_WT:FBgn0003042_SRR1552296
GSE60428.ph.embryo_16h-18h:FBgn0004861-FBgn0004860	GSE60428	ph	FBgn0004861-FBgn0004860	embryo	embryo	whole_embryo	16-18h	embryo.whole_embryo.16-18h	16h-18h	remap2022_GSE60428.ph.embryo_16h-18h:FBgn0004861-FBgn0004860_SRR3712752,remap2022_GSE60428.ph.embryo_16h-18h:FBgn0004861-FBgn0004860_SRR3712753	remap2022_GSE60428.Input.ph.embryo_16h-18h:FBgn0004861-FBgn0004860_SRR3712754,remap2022_GSE60428.Input.ph.embryo_16h-18h:FBgn0004861-FBgn0004860_SRR3712755
GSE60428.ph.embryo_4h-12h:FBgn0004861-FBgn0004860	GSE60428	ph	FBgn0004861-FBgn0004860	embryo	embryo	whole_embryo	4-12h	embryo.whole_embryo.4-12h	4h-12h	remap2022_GSE60428.ph.embryo_4h-12h:FBgn0004861-FBgn0004860_SRR1552239,remap2022_GSE60428.ph.embryo_4h-12h:FBgn0004861-FBgn0004860_SRR1552263	remap2022_GSE60428.Input.ph.embryo_4h-12h:FBgn0004861-FBgn0004860_SRR1552243,remap2022_GSE60428.Input.ph.embryo_4h-12h:FBgn0004861-FBgn0004860_SRR1552267
GSE60428.pho.embryo_4h-12h:FBgn0002521	GSE60428	pho	FBgn0002521	embryo	embryo	whole_embryo	4-12h	embryo.whole_embryo.4-12h	4h-12h	remap2022_GSE60428.pho.embryo_4h-12h:FBgn0002521_SRR1552282,remap2022_GSE60428.pho.embryo_4h-12h:FBgn0002521_SRR1552286	remap2022_GSE60428.Input.pho.embryo_4h-12h:FBgn0002521_SRR1552243,remap2022_GSE60428.Input.pho.embryo_4h-12h:FBgn0002521_SRR1552267
GSE60428.pho.embryo_4h-12h_Phdel:FBgn0002521	GSE60428	pho	FBgn0002521	embryo	embryo	whole_embryo	4-12h	embryo.whole_embryo.4-12h	4h-12h,Phdel	remap2022_GSE60428.pho.embryo_4h-12h_Phdel:FBgn0002521_SRR1552294,remap2022_GSE60428.pho.embryo_4h-12h_Phdel:FBgn0002521_SRR1552300	remap2022_GSE60428.Input.pho.embryo_4h-12h_Phdel:FBgn0002521_SRR1552293,remap2022_GSE60428.Input.pho.embryo_4h-12h_Phdel:FBgn0002521_SRR1552299
GSE60428.pho.embryo_4h-12h_WT:FBgn0002521	GSE60428	pho	FBgn0002521	embryo	embryo	whole_embryo	4-12h	embryo.whole_embryo.4-12h	4h-12h,WT	remap2022_GSE60428.pho.embryo_4h-12h_WT:FBgn0002521_SRR1552291,remap2022_GSE60428.pho.embryo_4h-12h_WT:FBgn0002521_SRR1552297	remap2022_GSE60428.Input.pho.embryo_4h-12h_WT:FBgn0002521_SRR1552296
GSE60686.ph.Schneider-2:FBgn0004861-FBgn0004860	GSE60686	ph	FBgn0004861-FBgn0004860	Schneider-2:FBgn0004861-FBgn0004860	S2	S2	NA	S2		remap2022_GSE60686.ph.Schneider-2:FBgn0004861-FBgn0004860_SRR1556383,remap2022_GSE60686.ph.Schneider-2:FBgn0004861-FBgn0004860_SRR1556384	remap2022_GSE60686.Input.ph.Schneider-2:FBgn0004861-FBgn0004860_SRR1556387,remap2022_GSE60686.Input.ph.Schneider-2:FBgn0004861-FBgn0004860_SRR1556388
GSE60686.ph.Schneider-2_ph-ML:FBgn0004861-FBgn0004860	GSE60686	ph	FBgn0004861-FBgn0004860	Schneider-2	S2	S2	NA	S2	ph-ML	remap2022_GSE60686.ph.Schneider-2_ph-ML:FBgn0004861-FBgn0004860_SRR1556385,remap2022_GSE60686.ph.Schneider-2_ph-ML:FBgn0004861-FBgn0004860_SRR1556386	remap2022_GSE60686.Input.ph.Schneider-2_ph-ML:FBgn0004861-FBgn0004860_SRR1556389,remap2022_GSE60686.Input.ph.Schneider-2_ph-ML:FBgn0004861-FBgn0004860_SRR1556390
GSE61308.Pc.embryo_EZ2-2:FBgn0003042	GSE61308	Pc	FBgn0003042	embryo	embryo	whole_embryo	NA	embryo.whole_embryo	EZ2-2	remap2022_GSE61308.Pc.embryo_EZ2-2:FBgn0003042_SRR1573161r1-SRR1573161r2,remap2022_GSE61308.Pc.embryo_EZ2-2:FBgn0003042_SRR1573162r1-SRR1573162r2
GSE61340.msl-1.third-instar_salivary-glands_female_AA1-584:FBgn0005617	GSE61340	msl-1	FBgn0005617	third-instar	third_instar_larva	salivary-gland	NA	third_instar_larva.salivary-gland	salivary-glands,female,AA1-584	remap2022_GSE61340.msl-1.third-instar_salivary-glands_female_AA1-584:FBgn0005617_SRR1573540	remap2022_GSE61340.Input.msl-1.third-instar_salivary-glands_female_AA1-584:FBgn0005617_SRR1573541
[truncated: 206 more rows]
